# Supplementary material for: Characterization of long non-coding RNA and messenger RNA profiles in laryngeal cancer by weighted gene co-expression network analysis
Source: PubMed Central journal article supplement (PMC6914418; doi:10.18632/aging.102419), 2019-11-18
Supplement: aging-11-102419-s003..pdf [file aging-11-102419-s003..pdf]

## SUPPLEMENTARY TABLES

**Supplementary Table 4. Analysis of network topology for various softthresholding powers.**

| <b>Power</b> | <b>SFT.R.<sup>sq</sup></b> | <b>slope</b> | <b>truncated.R.<sup>sq</sup></b> | <b>mean.k.</b> | <b>median.k.</b> | <b>max.k.</b> |
|--------------|----------------------------|--------------|----------------------------------|----------------|------------------|---------------|
| 1            | 0.7                        | 11.3         | 0.784                            | 723            | 7.07E+02         | 1190          |
| 2            | 0.156                      | 0.669        | 0.979                            | 170            | 1.55E+02         | 440           |
| 3            | 0.65                       | -1.56        | 0.986                            | 52.6           | 4.29E+01         | 206           |
| 4            | 0.811                      | -1.91        | 0.969                            | 19.7           | 1.37E+01         | 112           |
| 5            | 0.87                       | -1.95        | 0.975                            | 8.56           | 5.04E+00         | 67.5          |
| 6            | 0.898                      | -1.93        | 0.986                            | 4.18           | 2.06E+00         | 43.8          |
| 7            | 0.91                       | -1.9         | 0.986                            | 2.25           | 1.08E+00         | 30.1          |
| 8            | 0.91                       | -1.84        | 0.975                            | 1.32           | 5.59E-01         | 21.7          |
| 9            | 0.882                      | -1.65        | 0.959                            | 0.839          | 2.87E-01         | 16.2          |
| 10           | 0.814                      | -1.52        | 0.897                            | 0.57           | 1.55E-01         | 12.4          |
| 12           | 0.91                       | -1.8         | 0.932                            | 0.316          | 4.75E-02         | 7.67          |
| 13           | 0.86                       | -1.67        | 0.888                            | 0.254          | 2.80E-02         | 6.19          |
| 14           | 0.82                       | -1.48        | 0.866                            | 0.214          | 1.65E-02         | 5.06          |
| 15           | 0.759                      | -1.24        | 0.854                            | 0.186          | 9.72E-03         | 4.36          |
| 16           | 0.792                      | -1.62        | 0.812                            | 0.167          | 5.78E-03         | 3.82          |
| 17           | 0.801                      | -1.45        | 0.881                            | 0.153          | 3.51E-03         | 3.37          |
| 18           | 0.772                      | -1.32        | 0.848                            | 0.143          | 2.19E-03         | 2.99          |
| 19           | 0.737                      | -1.15        | 0.816                            | 0.135          | 1.39E-03         | 2.66          |
| 20           | 0.699                      | -0.824       | 0.826                            | 0.129          | 8.55E-04         | 2.38          |

Note:SFT= scale-free topology;sq=quare,k=number of clusters.

**Supplementary Table 5. List of genes in the co-expression pink module.**

| <b>Gene ID</b> | <b>Description</b>                                          |
|----------------|-------------------------------------------------------------|
| AP001610.5     | long intergenic non-protein coding RNA,AP001610.5           |
| C1R            | complement C1r                                              |
| C1S            | complement C1s                                              |
| C22orf46       | chromosome 22 open reading frame 46                         |
| C4orf33        | chromosome 4 open reading frame 33                          |
| CFH            | complement factor H                                         |
| CFI            | complement factor I                                         |
| CTD-2341M24.1  | long non-coding RNA CTD-2341M24.1                           |
| CTSL1          | cathepsin L                                                 |
| CYTOR          | cytoskeleton regulator RNA                                  |
| DANCR          | differentiation antagonizing non-protein coding RNA         |
| DDX60          | DExD/H-box helicase 60                                      |
| DDX60L         | DExD/H-box 60 like                                          |
| FLJ36031       | coiled-coil domain containing 71 like, C7orf74              |
| HCP5           | HLA complex P5                                              |
| HLA-C          | major histocompatibility complex, class I, C                |
| HLA-G          | major histocompatibility complex, class I, G                |
| HYI            | hydroxypyruvate isomerase (putative)                        |
| IFI6           | interferon alpha inducible protein 6                        |
| IFIT2          | interferon induced protein with tetratricopeptide repeats 2 |
| IFITM1         | interferon induced transmembrane protein 1                  |
| IFITM2         | interferon induced transmembrane protein 2                  |
| IFITM3         | interferon induced transmembrane protein 3                  |
| IL12RB2        | interleukin 12 receptor subunit beta 2                      |
| IL15           | interleukin 15                                              |
| LGALS3BP       | galectin 3 binding protein                                  |
| LGALS9C        | galectin 9C                                                 |
| LINC01869      | long intergenic non-protein coding RNA 1869                 |
| LINC01932      | long intergenic non-protein coding RNA 1932                 |
| LINC02012      | long intergenic non-protein coding RNA 2012                 |
| LINC02100      | long intergenic non-protein coding RNA 2100                 |
| MIR4435-2HG    | MIR4435-2 host gene                                         |
| MLKL           | mixed lineage kinase domain like pseudokinase               |
| OAS1           | 2'-5'-oligoadenylate synthetase 1                           |
| OAS2           | 2'-5'-oligoadenylate synthetase 2                           |
| OASL           | 2'-5'-oligoadenylate synthetase like                        |
| PARP10         | poly(ADP-ribose) polymerase family member 10                |
| PARP12         | poly(ADP-ribose) polymerase family member 12                |
| PCSK7          | proprotein convertase subtilisin/kexin type 7               |
| PLSCR1         | phospholipid scramblase 1                                   |
| RAC2           | Rac family small GTPase 2                                   |
| RP11-1398P2.1  | long non-coding RNA RP11-1398P2.1                           |
| RP11-20D14.6   | long non-coding RNA RP11-20D14.6                            |

|               |                                                                  |
|---------------|------------------------------------------------------------------|
| RP11-218C14.8 | long non-coding RNA RP11-218C14.8                                |
| RP11-247A12.2 | long non-coding RNA RP11-247A12.2                                |
| RP11-288L9.4  | long non-coding RNA RP11-288L9.4                                 |
| RP11-326G21.1 | long non-coding RNA RP11-326G21.1                                |
| RP1-137D17.2  | long non-coding RNA RP1-137D17.2                                 |
| RP11-38L15.3  | long non-coding RNA RP11-38L15.3                                 |
| RP11-430H10.3 | long non-coding RNA RP11-430H10.3                                |
| RP11-646E18.4 | long non-coding RNA RP11-646E18.4                                |
| RP11-661A12.4 | long non-coding RNA RP11-661A12.4                                |
| RP11-661A12.5 | long non-coding RNA RP11-661A12.5                                |
| RP11-977B10.2 | long non-coding RNA RP11-977B10.2                                |
| RP5-1185I7.1  | long non-coding RNA RP5-1185I7.1                                 |
| RP5-884M6.1   | long non-coding RNA RP5-884M6.1                                  |
| RSAD2         | radical S-adenosyl methionine domain containing 2                |
| SERPING1      | serpin family G member 1                                         |
| SIX5          | SIX homeobox 5                                                   |
| SLC22A3       | solute carrier family 22 member 3                                |
| SLC4A11       | solute carrier family 4 member 11                                |
| SP100         | SP100 nuclear antigen                                            |
| TDRD7         | tudor domain containing 7                                        |
| TNFSF10       | TNF superfamily member 10                                        |
| TRANK1        | tetratricopeptide repeat and ankyrin repeat containing 1         |
| TRIM21        | tripartite motif containing 21                                   |
| TRIM22        | tripartite motif containing 22                                   |
| TRIM5         | tripartite motif containing 5                                    |
| TRPV4         | transient receptor potential cation channel subfamily V member 4 |
| UBE2L6        | ubiquitin conjugating enzyme E2 L6                               |
| XAF1          | XIAP associated factor 1                                         |
| ZNF649-AS1    | ZNF649 antisense RNA 1, non coding RNA                           |
| ZNRD1ASP      | zinc ribbon domain containing 1 antisense, non coding RNA        |

---

**Supplementary Table 6. The hub genes in the co-expression pink module.**

| Hub genes | Description                                                 |
|-----------|-------------------------------------------------------------|
| IFIT2     | interferon induced protein with tetratricopeptide repeats 2 |
| XAF1      | XIAP associated factor 1                                    |
| UBE2L6    | ubiquitin conjugating enzyme E2 L6                          |
| IFITM3    | interferon induced transmembrane protein 3                  |
| HLA-C     | major histocompatibility complex, class I, C                |
| CTSL      | cathepsin L                                                 |
| ARHGDIB   | Rho GDP dissociation inhibitor beta                         |
| LGALS3BP  | galectin 3 binding protein                                  |
| IFITM1    | interferon induced transmembrane protein 1                  |
| MLKL      | mixed lineage kinase domain like pseudokinase               |
| SERPING1  | serpin family G member 1                                    |
| TRIM21    | tripartite motif containing 21                              |

**Supplementary Table 8. Gene ontology analysis that are involved with the genes in the co-expression pink module.**

| GO ID      | GO term                                                            | Group P value | Group P Value corrected with benjamini-hochberg | % Associated genes | Nr. genes | Associated genes found                                                                    |
|------------|--------------------------------------------------------------------|---------------|-------------------------------------------------|--------------------|-----------|-------------------------------------------------------------------------------------------|
| GO:0070206 | protein trimerization                                              | 0.00          | 0.00                                            | 6.78               | 4.00      | [MLKL, TRIM21, TRIM22, TRIM5]                                                             |
| GO:2000257 | regulation of protein activation cascade                           | 0.00          | 0.00                                            | 4.07               | 5.00      | [C1R, C1S, CFH, CFI, SERPING1]                                                            |
| GO:0030449 | regulation of complement activation                                | 0.00          | 0.00                                            | 4.13               | 5.00      | [C1R, C1S, CFH, CFI, SERPING1]                                                            |
| GO:0043901 | negative regulation of multi-organism process                      | 0.00          | 0.00                                            | 6.32               | 11.00     | [IFITM1, IFITM2, IFITM3, OAS1, OASL, PARP10, PLSCR1, RSAD2, SP100, TRIM21, TRIM5]         |
| GO:0043903 | regulation of symbiosis, encompassing mutualism through parasitism | 0.00          | 0.00                                            | 4.64               | 11.00     | [IFITM1, IFITM2, IFITM3, OAS1, OASL, PARP10, PLSCR1, RSAD2, SP100, TRIM21, TRIM5]         |
| GO:0034340 | response to type I interferon                                      | 0.00          | 0.00                                            | 14.29              | 13.00     | [HLA-C, HLA-G, IFI6, IFIT2, IFITM1, IFITM2, IFITM3, OAS1, OAS2, OASL, RSAD2, SP100, XAF1] |
| GO:0034341 | response to interferon-gamma                                       | 0.00          | 0.00                                            | 6.78               | 12.00     | [HLA-C, HLA-G, IFITM1, IFITM2, IFITM3, OAS1, OAS2, OASL, SP100, TRIM21, TRIM22, TRIM5]    |

|            |                                             |      |      |       |       |                                                                                              |
|------------|---------------------------------------------|------|------|-------|-------|----------------------------------------------------------------------------------------------|
| GO:0048525 | negative regulation of viral process        | 0.00 | 0.00 | 11.96 | 11.00 | [IFITM1, IFITM2, IFITM3, OAS1, OASL, PARP10, PLSCR1, RSAD2, SP100, TRIM21, TRIM5]            |
| GO:0050792 | regulation of viral process                 | 0.00 | 0.00 | 5.42  | 11.00 | [IFITM1, IFITM2, IFITM3, OAS1, OASL, PARP10, PLSCR1, RSAD2, SP100, TRIM21, TRIM5]            |
| GO:0051607 | defense response to virus                   | 0.00 | 0.00 | 5.56  | 13.00 | [DDX60, IFIT2, IFITM1, IFITM2, IFITM3, IL15, OAS1, OAS2, OASL, PLSCR1, RSAD2, TRIM22, TRIM5] |
| GO:0035455 | response to interferon-alpha                | 0.00 | 0.00 | 20.83 | 5.00  | [IFIT2, IFITM1, IFITM2, IFITM3, OAS1]                                                        |
| GO:0035456 | response to interferon-beta                 | 0.00 | 0.00 | 21.74 | 5.00  | [IFITM1, IFITM2, IFITM3, PLSCR1, XAF1]                                                       |
| GO:0019079 | viral genome replication                    | 0.00 | 0.00 | 7.21  | 8.00  | [IFITM1, IFITM2, IFITM3, OAS1, OASL, PARP10, PLSCR1, RSAD2]                                  |
| GO:0071346 | cellular response to interferon-gamma       | 0.00 | 0.00 | 5.73  | 9.00  | [HLA-C, HLA-G, OAS1, OAS2, OASL, SP100, TRIM21, TRIM22, TRIM5]                               |
| GO:0071357 | cellular response to type I interferon      | 0.00 | 0.00 | 14.94 | 13.00 | [HLA-C, HLA-G, IFI6, IFIT2, IFITM1, IFITM2, IFITM3, OAS1, OAS2, OASL, RSAD2, SP100, XAF1]    |
| GO:1903900 | regulation of viral life cycle              | 0.00 | 0.00 | 7.19  | 10.00 | [IFITM1, IFITM2, IFITM3, OAS1, OASL, PARP10, PLSCR1, RSAD2, TRIM21, TRIM5]                   |
| GO:1903901 | negative regulation of viral life cycle     | 0.00 | 0.00 | 13.33 | 10.00 | [IFITM1, IFITM2, IFITM3, OAS1, OASL, PARP10, PLSCR1, RSAD2, TRIM21, TRIM5]                   |
| GO:0032897 | negative regulation of viral transcription  | 0.00 | 0.00 | 12.00 | 3.00  | [IFITM3, SP100, TRIM21]                                                                      |
| GO:0046782 | regulation of viral transcription           | 0.00 | 0.00 | 4.41  | 3.00  | [IFITM3, SP100, TRIM21]                                                                      |
| GO:0060333 | interferon-gamma-mediated signaling pathway | 0.00 | 0.00 | 9.28  | 9.00  | [HLA-C, HLA-G, OAS1, OAS2, OASL, SP100, TRIM21, TRIM22, TRIM5]                               |
| GO:0060337 | type I interferon signaling pathway         | 0.00 | 0.00 | 14.94 | 13.00 | [HLA-C, HLA-G, IFI6, IFIT2, IFITM1, IFITM2, IFITM3, OAS1, OAS2, OASL, RSAD2, SP100]          |

|            |                                                   |      |      |       |      |                                                                     |
|------------|---------------------------------------------------|------|------|-------|------|---------------------------------------------------------------------|
| GO:0045069 | regulation of viral genome replication            | 0.00 | 0.00 | 9.64  | 8.00 | XAF1<br>[IFITM1, IFITM2, IFITM3, OAS1, OASL, PARP10, PLSCR1, RSAD2] |
| GO:0045071 | negative regulation of viral genome replication   | 0.00 | 0.00 | 15.69 | 8.00 | [IFITM1, IFITM2, IFITM3, OAS1, OASL, PARP10, PLSCR1, RSAD2]         |
| GO:0046718 | viral entry into host cell                        | 0.00 | 0.00 | 4.07  | 5.00 | [IFITM1, IFITM2, IFITM3, TRIM21, TRIM5]                             |
| GO:0046596 | regulation of viral entry into host cell          | 0.00 | 0.00 | 14.71 | 5.00 | [IFITM1, IFITM2, IFITM3, TRIM21, TRIM5]                             |
| GO:0046597 | negative regulation of viral entry into host cell | 0.00 | 0.00 | 20.00 | 4.00 | [IFITM1, IFITM2, IFITM3, TRIM5]                                     |

**Supplementary Table 9. The list of RNA molecules that were assessed on the cell lines.**

| RNA type | Primer name     | Primer sequence (from 5' to 3') |
|----------|-----------------|---------------------------------|
| lncRNA   | CYTOR-F         | CCACATTCCAACCTCCGTCTGC          |
|          | CYTOR-R         | TCGGCGGGCAACAGGTAGAG            |
|          | MIR4435-2HG-F   | GTTGCCCGCCGATCACAGC             |
|          | MIR4435-2HG-R   | ACCGACCAGACCAGCCCATG            |
|          | RP1-137D17.2-F  | CCAAGTTCTGCTGCTGCCTCAG          |
|          | RP1-137D17.2-R  | TCCCTCCCATGCCCTGAAACC           |
|          | RP11-247A12.2-F | AGGCTGGAGTGCGGTGGTG             |
|          | RP11-247A12.2-R | GGGAGGGTGAGGCAGGAGAATC          |
|          | RP11-646E18.4-F | GGGAGGGCTAGTCACGGAACG           |
|          | RP11-646E18.4-R | CCTCAGCCTCTGCTCCTCCAC           |
|          | RP11-661A12.4-F | ACCAGAAGGGGCTACCGCATAG          |
|          | RP11-661A12.4-R | TTGGCGAGAGAGCAGAGGTCAG          |
|          | RP11-661A12.5-F | AGAGCAGGAGAAGACGCAGGAG          |
|          | RP11-661A12.5-R | TGATCTGTGCAGTGCGGTTGTC          |
|          | RP11-977B10.2-F | GGTCTTGAGTGGGGCAATCAGC          |
|          | RP11-977B10.2-R | GAGGTCTTTCAGGAGCCGATG           |
|          | IFIT2-F         | AACCTACTGGCCTATCTAAAGC          |
|          | IFIT2-R         | CATGCTCTTGCTGGATTAATC           |
|          | XAF1-F          | AAGAGGTTCTGGTTTCAGGAAA          |
|          | XAF1-R          | CTGAGCTTGAGTATCTCCAGAG          |
| mRNA     | UBE2L6-F        | AGCTGGAGGATCTTCAGAAGAA          |
|          | UBE2L6-R        | TGGTTGTGAATTTGATCATGGG          |
|          | IFITM3-F        | CTTCTTCTCCTGTCAACAGT            |
|          | IFITM3-R        | GTTTCATGAAGAGGGTGTGTAAC         |
|          | HLA-C-F         | CTACGACGGCAAGGATTACATC          |
|          | HLA-C-R         | CTCATGGTCAGAGACGAGATG           |
|          | CTSL-F          | TATTTTGAGCCAGACTGTAGCA          |
|          | CTSL-R          | GATTCTGTGCTTTCAAATCCGT          |
|          | ARHGDIB-F       | GCAAGCTCAATTATAAGCCTCC          |
|          | ARHGDIB-R       | CTTCCAGATCTCCAGTAAGGTC          |
|          | LGALS3BP-F      | CAATGGTACTTCTACTCCCGAA          |
|          | LGALS3BP-R      | GAAGTGTAGGCAGAGCTTCTC           |
|          | IFITM1-F        | GTTCAACACCCTCTTCTTGAAC          |
|          | IFITM1-R        | CATCTTCCTGTCCCTAGACTTC          |
|          | MLKL-F          | TCCTCTGGGAAATCGCCACTGG          |
|          | MLKL-R          | GCTCCTGCTGCCGCTTAC              |
|          | SERPING1-F      | GATGCTATTCGTTGAACCCATC          |
|          | SERPING1-R      | CAAGTCAGAGCAGAGAGTAACA          |
|          | TRIM21-F        | TCCTTCTACAACATCACTGACC          |
|          | TRIM21-R        | CAATATTCAGTGGACAGAGGGT          |

Note: F means forward, and R means reverse.
