# Supplementary material for: Characterization of long non-coding RNA and messenger RNA profiles in laryngeal cancer by weighted gene co-expression network analysis
Source: Aging (Albany NY). 2019 Nov 18;11(22):10074–99. doi: 10.18632/aging.102419 (PMC6914418; doi:10.18632/aging.102419)
Supplement: Supplementary Table 1 [file aging-11-102419-s005..xlsx]

## Sheet: Sheet1
Supplementary Table 1. LncRNA expression of laryngeal cancers from TCGA database for the WGCNA analysis.
Sample	TCGA-BA-4076	TCGA-BA-4078	TCGA-BA-5555	TCGA-BA-6868	TCGA-BA-6869	TCGA-BA-6870	TCGA-BA-A6DA	TCGA-BA-A6DI	TCGA-BB-4217	TCGA-BB-7862	TCGA-BB-7864	TCGA-BB-7870	TCGA-CN-4722	TCGA-CN-4723	TCGA-CN-4727	TCGA-CN-4735	TCGA-CN-4738	TCGA-CN-4739	TCGA-CN-5355	TCGA-CN-5356	TCGA-CN-5360	TCGA-CN-5361	TCGA-CN-5363	TCGA-CN-6010	TCGA-CN-6012	TCGA-CN-6021	TCGA-CN-6022	TCGA-CN-6023	TCGA-CN-6988	TCGA-CN-6989	TCGA-CN-6992	TCGA-CN-6997	TCGA-CN-A497	TCGA-CN-A49B	TCGA-CN-A63T	TCGA-CN-A641	TCGA-CR-6474	TCGA-CR-7364	TCGA-CR-7370	TCGA-CR-7371	TCGA-CR-7374	TCGA-CR-7388	TCGA-CR-7389	TCGA-CR-7398	TCGA-CR-7399	TCGA-CR-7402	TCGA-CV-5430	TCGA-CV-5431	TCGA-CV-5432
H19	10.1163	14.6089	10.3134	9.45303	16.4692	11.7796	9.43436	16.8012	16.1466	12.1196	15.4151	16.6944	14.2048	12.5701	17.4343	10.6829	14.3556	16.9287	17.2235	15.9252	14.4952	13.6919	14.6303	10.4635	13.2622	13.0494	15.818	11.0737	16.6818	15.2799	12.3514	12.2309	15.5433	12.1962	16.4482	16.2881	15.1058	17.1915	16.2187	13.9646	12.7097	12.4228	12.88	16.1882	9.24897	13.3418	15.9262	13.1399	13.6218
MIR675	10.1163	14.6089	10.3134	9.45303	16.4692	11.7796	9.43436	16.8012	16.1466	12.1196	15.4151	16.6944	14.2048	12.5701	17.4343	10.6829	14.3556	16.9287	17.2235	15.9252	14.4952	13.6919	14.6303	10.4635	13.2622	13.0494	15.818	11.0737	16.6818	15.2799	12.3514	12.2309	15.5433	12.1962	16.4482	16.2881	15.1058	17.1915	16.2187	13.9646	12.7097	12.4228	12.88	16.1882	9.24897	13.3418	15.9262	13.1399	13.6218
CCAT1	7.516	6.91083	7.43367	9.98815	11.0884	7.79533	7.91082	10.4924	8.39886	11.2873	10.3051	9.62642	8.63315	11.0124	6.92313	7.60575	9.71753	9.16135	9.91839	9.35431	9.68823	7.38862	8.41512	10.4086	8.58213	9.5707	11.7797	11.0033	10.214	11.9398	11.6032	10.4712	10.8346	7.34467	12.0822	10.1914	7.72245	9.94374	10.6576	11.8712	9.66603	10.209	7.65565	7.2355	7.34304	8.68921	7.03728	9.3509	8.13091
WFDC21P	11.8454	10.0638	14.2441	8.45875	12.9144	11.2689	15.5293	13.3659	12.178	13.8926	13.5255	14.2121	12.3157	10.0036	12.4411	12.1102	13.0717	15.4044	11.9009	11.7379	12.3376	8.19374	8.29804	10.7267	12.5142	14.7385	10.0028	8.39818	15.1815	10.4514	10.6932	9.26172	10.4153	14.3124	12.407	15.4412	10.0685	13.2342	9.84705	11.8838	11.0847	11.4866	12.3493	11.3381	10.5611	11.6727	11.0816	12.4064	13.6772
RP11-69G7.1	7.40347	8.80088	9.84084	7.30279	8.8579	7.66586	7.55099	6.64609	7.03907	7.12562	6.8747	7.83582	9.2777	10.3877	9.18	11.1146	7.49463	7.92731	9.80725	10.1733	7.27368	7.77089	7.49318	9.75852	7.54969	7.58133	10.078	7.15111	6.53071	9.22002	11.0766	10.3887	10.6122	7.31495	10.3765	10.5258	7.72544	9.94079	11.059	7.35057	11.0146	7.80962	8.72936	9.03652	7.70898	8.14518	8.76298	9.17853	10.6155
RP11-110A12.2	7.5503	7.07917	7.41893	7.35223	10.7371	7.63781	9.46802	8.76464	8.19911	9.94962	7.77959	6.66736	9.57719	10.3583	8.67219	10.3394	7.47433	7.87401	7.66006	8.13984	7.31149	7.56642	7.49318	10.7076	8.98977	7.58133	7.92917	10.699	8.47156	9.24253	11.4083	9.81018	6.97726	7.35071	11.6507	10.6067	7.6844	7.65736	9.91761	10.0509	11.1409	10.3743	10.1095	8.05039	7.68497	10.3945	9.02529	7.8035	9.7209
LINC01133	8.80267	12.1625	12.7194	8.71241	11.9357	9.2556	9.37871	10.7729	8.86272	12.2139	13.2401	11.9841	9.78878	8.88355	10.4892	9.28174	9.91228	11.9256	10.8038	9.50308	10.9036	8.37618	7.96259	10.3052	11.9271	14.1183	7.28399	8.903	10.9232	11.1069	11.6414	10.6373	12.2564	11.4331	9.98552	11.6162	8.8261	10.1756	12.0229	11.6064	12.172	11.5545	12.6306	10.7597	9.48434	12.2641	9.99331	9.42724	11.4933
RP11-357H14.17	10.911	6.92459	7.48656	10.9087	6.92998	10.0639	10.4873	7.85981	9.69663	9.60625	7.72867	9.87676	7.74243	10.1617	6.5662	10.5379	10.2393	6.87495	8.60686	7.99847	7.43602	7.52832	7.5224	9.62863	7.66105	7.7288	10.9406	7.27562	6.55969	9.67153	9.43118	10.1306	6.99355	9.96676	10.4025	9.91157	9.8206	6.94385	7.77737	9.91285	9.95683	9.78579	7.69642	9.7296	10.545	7.44238	7.20556	10.0316	7.30162
FAM83A-AS1	11.9177	6.95708	9.55221	10.8621	9.15171	10.9936	12.6606	10.3717	9.23657	7.84414	8.54891	8.73761	10.1756	9.63736	8.5134	7.12394	11.713	10.2537	9.72437	10.6126	7.84443	7.62513	8.42427	7.9716	9.48788	8.11829	9.72197	7.16329	9.5914	9.67521	7.84292	8.69971	8.0302	9.17214	11.0982	7.73569	10.2302	9.80713	8.24718	9.85153	8.07274	9.44433	10.6637	7.14554	7.29625	8.85913	10.7134	8.31383	10.5578
CASC19	7.7002	6.97601	7.44557	9.03606	10.4863	7.65636	8.12798	8.96438	8.25518	9.99227	10.0726	9.84792	7.87497	10.3583	6.85327	7.34573	9.10843	8.28214	8.63393	8.31851	9.15649	7.4173	7.90562	9.50481	7.63656	8.2535	11.2307	10.152	8.59046	11.1911	10.0926	8.8614	10.6005	7.41096	11.3611	9.19651	7.81937	8.20617	8.96619	10.8182	8.5716	8.66958	7.72143	6.97325	7.22598	8.59822	7.03728	8.33512	7.28244
RP11-297P16.4	7.42951	6.9372	8.63027	7.27732	7.36699	7.63781	9.34133	7.62172	10.0707	7.12255	12.4033	9.66734	12.0982	11.3392	13.3503	7.15891	8.15598	8.8736	13.4769	8.6661	8.34343	7.37683	7.5887	12.1879	8.14364	7.94582	10.4258	7.1371	12.5513	11.6444	11.3007	10.729	6.89069	7.31495	9.01269	12.167	9.00282	7.36547	12.0642	10.5562	12.6314	11.0615	12.4424	12.602	6.99868	8.44757	7.03728	7.41063	9.23673
CTA-384D8.31	8.66173	8.31986	14.2373	10.2547	12.101	8.08207	8.91838	7.75641	8.69648	9.62013	9.84521	7.95063	7.7882	12.7587	9.22052	11.9869	8.86646	10.2869	7.65869	10.5194	11.3302	8.58046	7.73443	8.00542	8.59678	7.73833	8.81612	8.05084	10.1432	7.6766	7.91459	7.57089	10.6047	13.042	11.1375	10.5276	8.93722	11.1126	9.74308	9.11765	11.8638	9.16187	9.0495	8.97178	9.03027	11.1734	9.28927	12.7372	7.47567
LINC01160	10.4518	7.85646	7.83279	8.92696	10.5142	7.88239	8.38952	6.96214	7.42033	9.0991	7.42205	7.49465	10.2415	9.93539	10.0759	11.5907	9.40141	10.0112	9.68426	7.93078	7.95211	10.45	9.96212	9.14339	8.10148	7.98121	10.5425	8.89703	8.87893	8.27823	11.5053	11.111	10.2722	9.95695	7.40123	9.25219	9.86656	9.71823	8.4235	8.99625	8.55769	10.1403	10.4952	8.80051	8.13275	9.63633	9.11473	9.44824	9.98254
CTD-2319I12.2	11.0116	9.06953	12.7692	8.13674	11.5462	9.96721	14.2538	12.0108	10.7341	12.4904	12.2135	12.6827	11.3725	9.06622	11.3095	11.0168	11.6014	13.8123	10.7726	10.5845	10.8304	8.19349	8.16872	9.59866	11.411	13.3906	9.36829	7.89839	13.7058	9.49971	9.63099	8.51895	9.28936	13.1065	11.0975	13.9437	9.47493	11.6884	8.77307	10.5405	9.90802	10.0915	11.2208	9.94735	9.31698	10.481	9.83732	11.113	12.2976
LOC105371849	11.0116	9.06953	12.7692	8.13674	11.5462	9.96721	14.2538	12.0108	10.7341	12.4904	12.2135	12.6827	11.3725	9.06622	11.3095	11.0168	11.6014	13.8123	10.7726	10.5845	10.8304	8.19349	8.16872	9.59866	11.411	13.3906	9.36829	7.89839	13.7058	9.49971	9.63099	8.51895	9.28936	13.1065	11.0975	13.9437	9.47493	11.6884	8.77307	10.5405	9.90802	10.0915	11.2208	9.94735	9.31698	10.481	9.83732	11.113	12.2976
LINC00519	8.95461	8.53473	10.7439	9.23466	10.1739	11.3165	10.2992	11.1635	8.98308	10.7008	11.8378	10.1037	8.63734	9.07529	8.03717	8.46099	9.93458	7.97642	8.11804	8.59238	11.2019	9.07287	8.87544	11.8509	10.6916	10.123	7.86992	9.84446	9.88961	10.9015	11.8507	10.4859	9.05974	10.3762	9.63696	10.9734	11.0737	9.43848	11.1145	10.1013	9.55776	10.573	11.8688	8.05621	9.09893	11.0418	8.23207	8.67775	11.1945
IGFL2-AS1	10.3999	7.04472	7.48016	10.5742	6.98504	7.72895	12.1472	11.8549	7.53516	7.22074	7.33672	7.7972	8.0946	11.0642	6.64459	7.70087	9.22401	7.1239	9.02533	7.26327	7.87865	10.1955	9.05757	8.00392	9.33164	10.7986	8.90395	7.43663	7.29738	8.32664	9.18852	9.20795	10.5823	8.04363	7.58617	7.96352	11.6133	8.39047	11.5649	8.75812	9.79239	10.4555	12.0316	8.00504	7.03267	7.37377	7.74066	11.8354	9.65812
LINC01615	11.4159	8.89557	9.27455	14.5183	7.46138	9.79341	9.34125	8.79455	8.59182	8.77876	12.0099	6.81151	9.67899	8.51357	8.84436	7.36967	10.161	7.0231	9.2561	8.78053	10.4021	9.37763	13.3931	8.95566	8.12621	8.31465	9.28464	7.49951	6.78809	9.09873	7.97086	12.4421	7.7719	9.98846	10.042	9.03565	11.4624	7.2206	7.59183	8.70897	8.51065	10.2549	9.96638	7.69947	7.72679	7.76456	7.42265	8.42605	8.83105
LINC01139	9.4224	6.86295	7.41893	8.61083	6.72382	9.68843	7.37875	6.80118	8.78224	9.29463	9.0315	8.11535	8.28799	9.02922	7.45229	12.4136	7.5272	8.8614	6.94534	7.97467	10.1449	7.37725	7.59667	7.36957	7.43628	7.59482	8.43145	7.13894	8.75798	8.1601	9.38856	9.78961	9.89556	7.31495	9.33225	8.83436	9.4764	8.94515	10.0056	7.41077	10.2215	7.26681	7.68867	8.94108	9.02946	11.0661	10.8292	10.1806	7.20476
PAX8-AS1	11.4354	9.0058	9.26537	7.60112	7.23663	7.71999	7.73982	6.85624	7.81575	7.4501	7.29545	8.26967	9.8024	9.8716	9.70762	9.67405	10.3879	7.57691	10.5235	9.21135	9.48349	10.1799	8.92569	7.56196	8.18388	7.99076	10.2464	10.2407	6.7274	10.9326	9.93966	10.6054	10.2018	9.08761	7.38896	10.4394	8.333	8.33054	9.19595	7.81892	9.2147	8.93689	8.92435	9.71045	7.92695	10.3431	8.74579	9.52129	9.89985
MIR31HG	9.82602	7.20956	9.71925	9.40598	8.26444	8.94184	8.71194	9.60477	9.05072	7.9605	10.6437	6.50784	12.0545	9.47492	9.68102	7.21878	10.9252	9.56548	11.585	10.5735	8.17816	10.1231	7.51151	9.77652	8.0759	7.60903	7.17889	8.15215	8.65374	8.64986	7.42867	9.05994	7.55481	11.0857	9.35292	9.10414	11.3794	8.13829	7.74979	8.36704	7.16357	8.47142	11.3136	7.93553	9.22391	8.56949	7.23208	7.49128	9.61386
RP11-350J20.12	10.3978	6.85	8.60465	9.85285	9.22917	9.62351	12.2528	9.3412	9.19147	8.0978	7.36598	7.01154	9.07063	8.0006	7.27357	7.29972	9.04839	9.45259	8.54509	7.88726	8.98375	7.81218	8.36688	8.18533	8.75625	8.89553	8.37571	7.13203	10.9384	7.39957	8.31962	7.33139	8.07933	8.31617	8.70975	10.0523	8.69154	9.75153	7.25671	10.0247	7.32487	9.10702	10.7999	6.83852	7.70277	8.28124	8.8909	8.10918	7.48013
LINC00668	7.45853	7.89342	9.18162	8.83401	6.7614	7.66459	7.38492	6.68016	7.02418	8.13619	6.85598	6.54562	8.90745	9.32299	6.57583	9.97923	8.44294	6.81722	6.97135	10.3637	9.28833	8.93589	7.59105	7.84878	9.54428	7.91266	8.42819	9.14139	6.54589	7.58144	10.8671	7.33186	11.4063	7.31495	6.91919	8.69773	8.44514	8.92057	8.44784	9.60451	9.11138	9.48448	7.9289	8.43992	9.05482	12.3807	7.49028	7.39473	10.5494
RP11-109M17.2	7.40347	6.76083	9.28946	7.48398	8.92118	9.68866	12.845	11.0051	8.80312	9.04068	6.84898	8.47771	8.9781	7.03767	9.82571	7.18438	7.7477	9.72032	9.53726	7.90066	8.0815	9.76124	7.49318	7.94225	7.43628	7.58133	8.40176	9.86083	9.46347	7.58528	7.30214	7.22317	7.76493	10.0861	8.21201	9.91421	8.3168	7.7764	7.03732	7.72661	7.16357	9.2101	10.2618	6.91115	11.7619	9.91629	7.03728	8.97507	7.98707
RP11-706O15.3	8.54911	9.90853	7.65311	8.72517	8.4546	8.27578	7.45674	6.77265	7.27214	7.45854	9.59203	7.69142	7.97752	8.97482	7.03719	8.62031	9.49283	9.4877	7.14	7.86156	7.37578	9.33218	9.55545	7.51236	9.05544	11.0019	8.61295	9.38864	8.05654	8.55648	10.3441	7.28533	7.2255	8.05227	7.08796	8.05463	9.85646	9.34193	11.1234	9.94941	7.33991	9.97184	8.09402	9.22227	8.58457	10.4587	10.5337	7.57969	8.47505
LINC00839	9.20198	10.7851	10.7097	10.5795	9.10441	8.01251	8.16461	7.92215	8.45799	10.0287	6.88669	9.07802	8.85173	7.16042	10.5337	7.08847	7.92093	6.91101	7.3152	9.91928	8.98324	7.83749	7.87221	7.57815	8.51521	9.07653	8.6188	10.2472	6.70893	9.84181	8.48796	9.12797	8.44461	9.76709	10.0804	9.56169	8.95306	8.98039	7.08416	9.15235	9.25366	9.80444	8.10328	9.78031	10.3529	11.1841	7.24664	9.70973	7.37825
LINP1	9.10742	6.65749	10.2271	9.27725	7.55295	10.9919	10.2749	8.8649	9.67801	7.32004	8.53885	6.56753	8.29968	9.88754	7.15345	7.27533	9.07712	8.17177	10.0442	7.69685	8.23571	7.96654	9.80408	9.45589	7.6152	8.77229	7.61615	7.83096	7.37868	8.32563	7.49803	10.5779	6.85797	9.83752	9.36657	6.92176	10.2251	8.38302	7.59699	7.7815	7.35863	8.818	8.70664	7.64692	7.09399	7.80545	7.03728	7.38642	10.0483
LOC440173	10.4144	10.8727	8.06144	10.3273	6.78928	10.2117	11.3102	10.5657	9.2344	9.46009	6.86585	7.01732	9.2663	10.5989	6.67833	11.4126	11.2329	8.35744	9.00316	7.52819	8.51713	11.1152	10.9302	10.4262	8.72799	9.19165	8.9168	9.76435	6.57433	9.4929	9.56156	10.7544	6.88204	10.7335	8.59722	7.60069	7.73785	8.10166	10.1888	11.0761	10.7163	10.54	10.2438	8.72719	11.5128	7.46002	9.11519	9.96904	9.75514
RP11-276H19.2	10.4144	10.8727	8.06144	10.3273	6.78928	10.2117	11.3102	10.5657	9.2344	9.46009	6.86585	7.01732	9.2663	10.5989	6.67833	11.4126	11.2329	8.35744	9.00316	7.52819	8.51713	11.1152	10.9302	10.4262	8.72799	9.19165	8.9168	9.76435	6.57433	9.4929	9.56156	10.7544	6.88204	10.7335	8.59722	7.60069	7.73785	8.10166	10.1888	11.0761	10.7163	10.54	10.2438	8.72719	11.5128	7.46002	9.11519	9.96904	9.75514
CTC-490G23.2	9.33013	7.05173	8.80594	8.1338	10.4403	8.50519	12.5023	10.8865	9.72046	7.86275	6.96804	9.05845	10.4518	8.18701	7.3378	7.65404	8.45928	8.99475	11.227	7.83348	10.7921	7.48204	7.60605	9.36093	9.22086	11.2951	7.86447	8.14119	11.0846	8.41819	8.16093	7.95748	7.98669	9.36108	8.04809	8.19427	8.75964	9.28832	9.2504	11.1016	8.4316	9.93193	11.3363	7.31755	8.14464	9.38664	7.17887	7.9996	9.34565
HOXC13-AS	9.76171	7.32576	7.67584	10.9971	7.52217	10.191	8.69199	9.96447	8.30879	8.05314	8.36193	6.75607	9.91593	8.87632	6.5662	8.44913	10.1589	8.18656	8.10152	7.42577	8.61625	10.3328	10.0262	7.90872	8.50853	9.29973	10.056	7.6842	6.96352	8.44825	7.83194	7.71549	6.85797	10.227	7.98312	8.65238	8.9751	7.1876	7.52006	8.5483	8.11236	8.9127	10.9494	6.94821	7.22399	7.37303	9.05459	7.64134	10.8492
LOC105376382	8.98445	7.02636	9.61465	11.1004	6.99849	9.44478	9.0491	8.61997	8.66297	8.69057	7.70292	6.79743	9.67911	8.12976	8.0419	8.43626	9.56006	7.22379	7.87217	8.46552	7.35737	9.22118	8.85535	7.69629	8.20529	7.93566	10.8777	7.17249	7.07357	8.53218	7.30711	9.7046	7.9727	10.3123	11.0532	8.37108	11.569	8.38686	7.33132	8.72692	7.49536	8.83777	8.49602	7.07751	7.30855	7.59301	7.47576	8.56533	8.70343
RP13-463N16.6	8.98445	7.02636	9.61465	11.1004	6.99849	9.44478	9.0491	8.61997	8.66297	8.69057	7.70292	6.79743	9.67911	8.12976	8.0419	8.43626	9.56006	7.22379	7.87217	8.46552	7.35737	9.22118	8.85535	7.69629	8.20529	7.93566	10.8777	7.17249	7.07357	8.53218	7.30711	9.7046	7.9727	10.3123	11.0532	8.37108	11.569	8.38686	7.33132	8.72692	7.49536	8.83777	8.49602	7.07751	7.30855	7.59301	7.47576	8.56533	8.70343
CTA-384D8.35	10.3959	8.86226	12.6923	11.6734	11.6524	11.7983	13.2493	9.9659	9.52088	11.4979	11.6107	11.371	9.45713	11.5412	8.62775	11.2998	9.75994	8.87139	9.79242	10.0668	11.4267	11.8775	10.9666	9.06035	10.8718	10.0968	9.29482	9.63599	9.67376	9.89316	10.2538	8.79322	9.09313	13.9049	12.4827	11.3757	11.4689	11.2206	9.68028	12.0001	10.6918	11.7381	10.8212	8.70233	10.5611	11.0641	9.82558	11.6809	11.0638
C5orf66-AS1	7.86542	6.69917	10.0316	8.03303	10.3289	8.97691	9.29936	7.84996	9.08892	8.04654	9.32592	7.55714	7.86061	7.46506	8.60226	7.63938	9.40229	10.5518	7.65657	7.38104	8.2663	7.56499	7.57367	8.58732	9.06513	10.2307	8.1597	7.17488	10.815	9.37014	9.39037	8.80631	9.96299	8.86642	7.5881	9.28542	8.25779	8.2721	7.37489	10.1883	9.12513	10.295	7.94652	7.38286	8.9512	11.9698	12.1426	7.76711	9.08364
WNT5A-AS1	8.21622	9.62094	9.20268	7.90417	7.68009	8.60153	7.54553	7.8671	7.71017	9.43173	7.78554	6.80806	10.0573	9.35159	7.94225	7.82519	8.83186	7.63473	9.24581	9.93366	10.5879	9.03583	8.3742	12.0773	11.3806	9.77968	9.27419	11.3745	7.41255	10.0611	9.42962	9.0525	9.0436	8.05441	7.72853	7.72273	10.8652	8.99799	10.2551	10.1715	9.47903	9.97914	10.786	9.63292	9.14343	10.0248	9.38377	9.11667	9.38655
AL928768.3	7.46551	6.78316	9.08673	7.32076	9.31786	9.32396	8.36905	8.18974	10.2677	7.33186	8.19585	7.93845	9.93015	8.14143	6.63024	7.57954	9.67109	9.50447	9.39628	9.29379	9.67317	7.45952	8.69076	9.54802	9.74904	10.2939	7.42968	8.82118	7.01326	7.63642	8.30585	7.89212	8.25325	7.70607	8.95138	8.01316	9.46557	8.19329	8.17781	9.4533	9.3196	10.5266	10.683	7.21638	7.6179	9.77975	9.08531	8.86674	9.3668
AL450992.2	8.63873	8.74589	8.32329	7.73163	7.71638	8.54459	8.60938	7.66139	10.1099	8.16213	10.752	8.44026	8.67873	9.45523	11.9782	11.8467	9.14884	7.63085	7.65318	11.0388	9.20841	9.85789	7.8059	8.39801	8.81215	9.30182	10.9283	8.20438	9.89443	9.34531	9.87651	10.1133	10.412	9.07555	10.5853	7.18175	8.35393	10.2047	9.20702	9.01158	8.82607	8.82324	8.97327	10.591	11.0736	10.511	8.24999	9.57778	9.33193
LINC00665	9.46009	7.12296	10.6984	7.29859	7.53061	9.04504	7.85344	7.5351	7.93171	9.61285	10.1948	8.09478	7.90915	7.70198	10.4761	7.3305	8.94416	7.08145	7.27937	10.2107	9.64954	7.75992	9.56158	8.12274	9.57025	9.57208	9.99387	7.31369	8.98521	7.74036	9.21387	7.34472	9.73444	7.35451	10.0673	6.74293	8.57416	9.47291	7.34317	8.05737	9.8564	9.62145	9.78444	9.63146	7.14185	10.0032	7.31996	7.58061	7.33935
CTA-384D8.34	10.3054	8.86234	12.6191	11.5355	11.6303	11.7321	12.9456	9.90968	9.46513	11.4309	11.5315	10.8827	9.55499	11.5565	8.60294	11.1549	9.6952	8.93801	9.82995	9.93446	11.369	11.8181	10.744	8.89958	11.0794	10.0938	9.19547	9.66204	9.68753	9.91626	10.1755	8.95767	9.10827	13.7338	12.3337	11.2536	11.3801	11.0351	9.65061	11.9411	10.7036	11.7138	10.844	8.62322	10.4501	11.1034	9.87744	11.575	10.9063
LINC01605	11.5529	9.30853	9.59642	11.9272	9.63777	12.8915	9.45247	8.36894	9.75344	10.0779	11.1946	7.22522	10.6086	9.47497	6.88354	8.95525	10.0072	9.97161	11.3636	10.6692	10.3804	9.19226	9.596	9.17628	8.8677	8.08261	10.6323	8.26263	9.28426	10.5778	8.73806	8.3971	8.8311	8.96381	8.66246	9.61325	13.2086	8.27735	9.47514	8.12284	9.03566	9.8642	10.4029	8.09644	7.18139	10.5215	7.98458	8.41045	9.66901
CTA-221G9.12	7.54457	9.89681	10.0666	8.09511	9.0304	7.98648	7.37875	8.11315	7.73469	7.73891	9.83799	6.84086	8.38022	7.61001	6.82335	8.76828	9.12089	8.31073	8.20194	9.08328	11.2098	7.71928	7.9944	10.0204	10.8608	10.1306	8.76302	9.12922	8.26176	9.28976	10.0038	9.62041	9.73026	7.97071	9.00424	7.56578	8.68053	9.5647	10.1451	10.4613	9.46209	8.57892	8.4978	8.46395	8.39144	10.1268	10.5336	8.57329	7.79019
LOC100128531	7.54457	9.89681	10.0666	8.09511	9.0304	7.98648	7.37875	8.11315	7.73469	7.73891	9.83799	6.84086	8.38022	7.61001	6.82335	8.76828	9.12089	8.31073	8.20194	9.08328	11.2098	7.71928	7.9944	10.0204	10.8608	10.1306	8.76302	9.12922	8.26176	9.28976	10.0038	9.62041	9.73026	7.97071	9.00424	7.56578	8.68053	9.5647	10.1451	10.4613	9.46209	8.57892	8.4978	8.46395	8.39144	10.1268	10.5336	8.57329	7.79019
RP11-527N22.2	9.31747	8.58427	8.65665	10.8571	8.41921	11.6081	8.55709	7.56248	8.54435	9.47664	10.6445	6.66422	10.0725	8.81826	6.64614	8.142	8.53627	9.67874	10.52	9.3861	8.89683	8.18579	9.02776	8.78419	8.23855	7.84795	9.88314	7.40577	8.36582	9.75121	8.16831	7.86191	8.4218	8.35971	8.10521	9.35211	11.9208	7.78366	8.75466	7.54902	7.99648	8.56898	9.43025	7.60136	7.12339	9.64224	7.36487	7.64202	9.11204
RP11-284F21.7	10.378	7.0327	10.2868	7.94344	8.6852	8.34458	7.74876	7.15491	8.28	7.26256	10.6287	6.94308	8.68871	8.03765	10.4617	8.68713	8.15027	8.68399	7.48665	8.84633	9.5932	9.11503	7.49318	10.1616	9.96606	9.12452	8.53588	12.4597	8.50807	9.13409	10.6993	10.4444	9.55425	7.31495	7.97002	8.93651	7.6844	6.8437	10.2531	7.36933	7.81643	9.68648	8.21539	8.60561	6.99868	8.9414	7.13677	7.52878	7.40106
RP11-524H19.2	9.51569	9.19014	9.8054	7.71149	8.50836	8.59331	8.47577	9.22644	7.95879	7.7324	8.85679	7.62405	9.66719	8.88628	10.1308	9.0497	8.87928	7.76577	7.61638	12.5732	9.85505	11.8852	8.35323	8.12015	8.26201	10.2161	7.46607	10.3936	13.7001	9.44378	9.39886	10.2745	9.8772	7.74175	8.93143	10.0741	9.20662	9.67862	7.93032	9.39401	9.88301	9.00043	10.2793	8.21719	9.18901	10.214	7.85759	8.41694	10.7689
SNORD3B-1	9.13772	9.38699	9.9077	8.84893	10.7395	9.50806	11.0846	8.67181	10.648	10.1802	8.42906	12.3592	8.55121	9.78501	8.9581	10.0739	8.51895	10.1689	10.8681	10.8703	8.74176	10.7399	9.89285	8.95988	8.79757	9.25018	8.80142	8.86102	9.4606	9.31402	8.23505	8.51301	8.06359	9.12657	9.30051	9.62308	11.1814	7.94126	7.44861	8.61987	7.60216	7.73729	8.7285	7.85848	9.05677	8.7642	9.39503	9.58441	12.6489
RP11-150O12.6	7.54336	10.0742	10.8219	9.38256	10.1601	10.009	8.4684	7.47493	7.44104	8.47419	9.05248	9.04091	8.00322	7.71535	6.5662	8.86997	8.2225	8.28605	7.70481	7.53227	10.1269	8.11017	7.98092	10.2451	10.1366	9.2294	8.02163	9.3522	7.64793	9.32829	10.0456	8.84558	9.04477	7.58147	7.05864	7.43987	10.7081	8.19714	10.688	8.09544	10.2001	8.05321	7.75077	8.20072	7.9437	9.80573	7.74462	8.43862	8.09712
LOC105376805	7.93465	8.00144	10.0441	7.49036	8.74186	8.70223	9.2277	8.32549	9.67149	10.3435	8.47973	9.46768	8.86498	8.43899	7.00149	10.6192	9.05724	7.34294	9.04657	8.69342	10.1909	11.8603	8.86681	8.20946	8.18876	9.85273	9.97547	7.79756	8.39393	9.24581	8.17643	9.08731	8.83724	10.0955	8.08888	9.14745	8.89033	9.10234	7.9085	10.8269	7.64615	9.19344	9.05145	10.5998	9.55537	8.39731	10.5266	7.88445	9.83436
RP11-108M9.4	7.93465	8.00144	10.0441	7.49036	8.74186	8.70223	9.2277	8.32549	9.67149	10.3435	8.47973	9.46768	8.86498	8.43899	7.00149	10.6192	9.05724	7.34294	9.04657	8.69342	10.1909	11.8603	8.86681	8.20946	8.18876	9.85273	9.97547	7.79756	8.39393	9.24581	8.17643	9.08731	8.83724	10.0955	8.08888	9.14745	8.89033	9.10234	7.9085	10.8269	7.64615	9.19344	9.05145	10.5998	9.55537	8.39731	10.5266	7.88445	9.83436
ZFPM2-AS1	9.76115	7.13548	7.44719	8.2311	6.79799	8.36289	8.86013	6.8271	7.06095	7.2954	6.90928	7.20591	8.83598	9.8245	10.2412	7.30014	8.42541	8.406	8.43029	9.42392	7.82471	8.89685	9.50117	7.50179	8.87066	7.61984	8.55783	7.23065	6.58072	7.87018	7.49279	7.64894	8.8225	8.39211	9.08112	7.89649	9.72324	8.1968	7.15326	7.4646	7.24559	8.22748	8.92399	8.08657	7.62412	9.48112	8.80577	7.42778	7.45362
LOC100505664	8.40911	7.17455	7.48144	8.28698	6.90506	7.90728	8.65715	7.6521	7.16572	7.17959	8.2825	6.63599	8.89599	8.8797	6.5662	7.21	7.74501	6.82489	8.05643	7.24654	9.89903	11.1113	7.53494	7.45823	9.73916	8.83048	7.64848	10.5169	6.63377	7.91488	7.69649	10.2361	6.85797	9.61154	7.48832	8.1979	8.98311	7.07028	8.37806	8.04326	8.1944	10.8823	11.881	6.75054	7.35661	7.43192	7.18998	7.68188	9.42209
RP4-737E23.2	8.40911	7.17455	7.48144	8.28698	6.90506	7.90728	8.65715	7.6521	7.16572	7.17959	8.2825	6.63599	8.89599	8.8797	6.5662	7.21	7.74501	6.82489	8.05643	7.24654	9.89903	11.1113	7.53494	7.45823	9.73916	8.83048	7.64848	10.5169	6.63377	7.91488	7.69649	10.2361	6.85797	9.61154	7.48832	8.1979	8.98311	7.07028	8.37806	8.04326	8.1944	10.8823	11.881	6.75054	7.35661	7.43192	7.18998	7.68188	9.42209
LINC01436	7.44626	7.8351	7.76541	7.72979	8.20195	7.83616	7.73245	7.35523	7.52882	8.39534	9.33255	7.50431	8.86009	8.83559	6.85034	11.3878	9.60926	8.50828	9.33509	10.3545	8.99241	7.44709	7.70209	8.58067	8.25846	7.90891	7.40489	7.29506	6.78944	9.40181	9.06338	7.48391	9.59795	10.3812	9.53571	10.0127	10.3236	7.95221	8.26751	7.57707	8.18014	8.42707	8.18354	9.39612	8.80903	9.80874	7.32013	7.47846	8.3709
DUXAP8	10.068	10.0579	9.68811	10.1457	6.82327	9.08372	7.45795	8.7312	8.40379	8.67941	6.88847	7.44789	9.10906	9.05237	7.32958	9.51252	8.80077	9.40235	8.11853	10.0692	8.75001	10.3924	8.16919	8.97505	11.6789	7.72017	9.18649	9.25963	7.55055	9.74577	9.45634	8.50692	7.11201	7.51772	8.42679	9.27487	9.58794	8.88929	11.1143	9.00463	9.86768	9.27146	9.84466	9.68941	8.66228	10.21	10.3379	9.17976	9.0622
AFAP1-AS1	10.7309	6.79851	10.3817	7.37328	10.3778	7.63781	7.37875	6.66099	9.47638	10.4477	8.95016	9.01286	7.66289	8.92699	11.8205	11.3261	7.47433	11.1099	8.11775	12.7599	9.18882	10.4599	7.49318	7.56278	7.43628	7.8519	7.51641	7.13203	10.216	7.33388	7.27173	7.33579	8.8875	7.45402	10.8295	9.69062	7.6844	11.6394	7.18863	7.84187	7.92282	10.4272	7.78994	10.0321	10.7278	10.7702	7.03728	9.8817	9.47661
SNHG5	10.7411	12.2522	10.7025	12.6815	11.5198	11.6433	11.3402	10.6312	11.6072	13.8401	12.8163	14.0685	13.431	11.0012	12.2461	11.4342	12.1556	10.3267	10.623	12.7445	12.3703	11.0204	13.8894	12.5994	12.8571	10.1451	13.3107	14.0663	11.1787	13.1721	12.795	12.6302	13.0293	13.8833	11.8302	12.6655	12.5652	11.7506	11.9806	13.0495	11.0475	13.1609	12.0993	11.89	11.1053	12.877	12.8494	11.2617	10.923
TINCR	11.5136	11.9853	11.6681	11.8601	9.99342	10.5489	11.252	10.367	9.47504	11.8658	11.5842	10.5378	11.7796	9.96991	7.94026	9.03299	10.1969	10.7873	10.543	10.0093	11.1399	10.0885	10.6421	9.97677	10.4877	13.1523	9.76309	8.91325	11.6838	9.61418	11.6557	8.81243	10.3757	10.449	9.82232	9.65846	11.054	11.3133	10.4345	10.6473	10.4375	11.0377	12.3265	10.7556	8.66343	13.599	11.6244	7.67092	12.2469
LOC102723373	7.48352	8.70432	11.4942	8.08455	9.42654	8.91545	7.37875	7.36487	8.1865	8.48909	8.74296	8.77406	9.21315	7.39922	8.91935	9.29547	9.51312	9.7884	7.41608	7.27293	10.3599	8.77383	7.58557	9.71968	7.53416	8.00005	7.24716	9.6383	9.59854	8.96837	9.44465	9.53779	8.37185	8.81053	7.20677	8.47476	7.85568	7.73991	10.0118	9.48128	10.1247	8.62735	9.11999	8.8248	8.55426	7.56308	9.95453	9.4062	8.62463
RP11-44F14.2	7.48352	8.70432	11.4942	8.08455	9.42654	8.91545	7.37875	7.36487	8.1865	8.48909	8.74296	8.77406	9.21315	7.39922	8.91935	9.29547	9.51312	9.7884	7.41608	7.27293	10.3599	8.77383	7.58557	9.71968	7.53416	8.00005	7.24716	9.6383	9.59854	8.96837	9.44465	9.53779	8.37185	8.81053	7.20677	8.47476	7.85568	7.73991	10.0118	9.48128	10.1247	8.62735	9.11999	8.8248	8.55426	7.56308	9.95453	9.4062	8.62463
HCP5	12.7138	10.4188	13.9579	12.6686	11.9726	13.0437	11.9828	12.2329	11.8927	9.8586	8.47629	10.6649	10.8537	12.7201	11.8484	12.4547	12.8076	9.56118	10.9753	11.2839	12.6008	13.3004	13.6603	12.0499	11.9975	10.1241	11.8654	12.9378	9.39049	11.6449	12.0072	11.8008	10.8998	13.2478	12.2054	10.3888	13.2212	9.88314	11.0707	11.6756	13.0244	12.2289	13.7776	10.7543	10.851	12.2145	10.9686	12.3313	9.97193
JHDM1D-AS1	9.60895	8.99659	10.6563	9.74447	9.82782	10.766	12.2728	10.9415	10.0254	10.9073	11.4453	9.58822	11.723	10.247	8.8311	9.03061	11.3818	10.4074	11.2281	10.3447	10.6023	10.4027	9.51716	11.0727	11.5884	11.6452	9.80156	9.26916	9.38465	10.9074	10.6977	10.6087	8.69274	11.1852	10.9084	10.1992	10.2792	10.8271	9.42128	11.6785	9.40789	11.1839	10.6589	8.50457	9.76821	9.33202	9.12745	10.5262	11.4128
SNORD3A	8.99256	9.21213	10.1924	8.80738	10.3986	8.92229	10.4329	8.12128	10.9758	9.93979	7.98805	11.8524	8.60551	9.718	8.83619	10.1562	8.25866	10.4478	10.8222	10.5499	8.87964	11.1291	10.0142	8.69227	8.49133	9.31762	8.53993	8.55733	8.98708	9.24168	8.31751	8.60552	7.49664	9.21429	9.15082	8.91491	11.1801	8.09977	7.77948	8.42525	8.04067	7.93135	8.86893	8.10479	9.87137	8.66233	9.11638	9.14355	12.4304
RP11-129M6.1	8.95036	7.97214	8.57607	8.45073	6.72382	7.88511	9.02829	8.26801	7.08939	8.59983	8.09011	6.55932	8.45616	8.0693	6.5662	7.03912	8.66929	8.23856	7.03331	8.50984	7.30466	9.22236	7.49318	7.91719	8.19658	9.28013	8.07716	8.93156	6.54266	7.35853	7.58155	7.23971	6.85797	7.31495	6.83663	6.64505	8.89594	7.24204	9.10253	8.82662	8.7318	8.7296	8.42875	8.05816	8.56282	8.1721	7.03728	7.38642	10.0236
LINC01291	8.42514	8.83871	9.28294	8.68384	7.72602	8.81455	7.84771	8.50539	7.22012	7.12255	6.92077	6.52557	8.67473	7.10567	8.09982	8.3734	8.66676	6.74633	8.29217	7.25358	8.42643	9.03953	9.21165	8.60457	8.72234	9.22225	7.20283	7.1444	8.404	8.68853	8.03226	8.82659	6.85797	7.32513	6.85638	6.57894	7.89548	8.3287	8.11238	8.6909	7.37177	7.34865	9.13283	8.52777	7.06518	8.4713	8.09272	7.39609	8.65735
RP11-557H15.3	13.2	6.79381	8.28841	7.53687	9.19301	8.3683	9.49046	7.01441	7.90667	7.75365	7.1182	9.87619	10.3399	7.97728	9.38609	7.06797	9.35933	7.49942	7.84174	8.35854	9.25225	9.71436	7.79638	7.8193	8.79873	8.04408	8.40537	7.52604	7.76429	8.21941	11.1914	7.76744	8.03615	9.71313	8.97394	10.6804	8.48527	8.01434	7.38631	8.14946	7.63094	8.47306	8.27282	8.00906	7.06975	8.25038	7.05247	7.98805	7.42487
LINC00174	7.91894	9.98854	9.24818	8.87494	10.194	9.91611	8.66494	7.72939	7.73832	7.59642	7.40738	8.27417	9.0344	9.00972	7.63149	8.59922	9.24225	8.58534	9.63985	8.44752	8.44503	9.64337	7.9829	9.35092	8.87308	7.82827	9.21714	8.54885	10.277	9.49166	8.57212	9.6907	10.5143	9.35478	8.68222	10.0482	10.3732	7.10555	7.74985	9.01384	9.90984	8.5338	8.75077	7.80388	7.80322	7.77583	8.07222	10.889	8.73152
LINC01871	8.45862	7.39699	9.3457	7.3517	8.85609	8.71575	9.55552	7.65543	8.73915	7.58786	7.26901	8.27332	8.30636	8.82199	6.74777	8.88926	9.58247	8.43533	7.67828	8.21595	9.88927	8.59545	9.25441	8.66254	8.44291	8.30375	7.10317	8.69211	7.379	7.78504	8.24138	7.59929	8.23755	10.1556	9.69143	7.24553	8.93008	7.57961	8.38056	8.90605	8.05214	8.84521	8.40729	7.32991	10.2858	9.44097	8.86822	9.8002	8.55765
LOC101928100	9.09874	10.1246	10.1396	8.3917	9.95299	8.14114	8.06959	8.64225	7.62007	10.5333	8.66624	9.50397	8.46392	9.62721	9.28974	7.93291	8.31992	9.62334	8.04047	8.00344	9.65724	8.38294	8.29728	9.76702	10.1682	12.4854	7.44384	9.53363	8.50631	8.87786	9.52807	8.30182	10.7073	10.1417	8.03503	7.61366	9.10184	8.14401	9.31498	8.86006	9.85702	9.23639	10.1296	10.0919	8.72115	8.86648	9.89978	8.70709	10.1703
RP11-277P12.20	9.09874	10.1246	10.1396	8.3917	9.95299	8.14114	8.06959	8.64225	7.62007	10.5333	8.66624	9.50397	8.46392	9.62721	9.28974	7.93291	8.31992	9.62334	8.04047	8.00344	9.65724	8.38294	8.29728	9.76702	10.1682	12.4854	7.44384	9.53363	8.50631	8.87786	9.52807	8.30182	10.7073	10.1417	8.03503	7.61366	9.10184	8.14401	9.31498	8.86006	9.85702	9.23639	10.1296	10.0919	8.72115	8.86648	9.89978	8.70709	10.1703
ELF3-AS1	9.00456	9.1631	10.9833	9.46154	10.0471	9.28121	11.451	9.60927	8.24075	10.8269	9.52355	9.41064	8.69612	9.56666	9.30726	8.54044	10.3948	10.9656	7.72496	8.78601	9.75186	8.95743	7.56078	10.1604	10.6577	10.1914	8.47531	10.3576	10.81	8.48216	9.97131	10.4688	11.1233	10.512	9.78638	9.03689	8.69821	10.9394	10.5085	10.5587	10.7451	10.0358	9.84261	10.9716	9.68738	10.0569	9.98887	10.4108	8.86608
LINC00707	8.77717	6.76472	7.57705	8.72475	6.87916	9.96374	9.22817	8.49215	8.6226	7.36431	8.38763	6.57309	8.54169	8.5079	6.63307	7.05546	10.8316	6.83877	9.53977	7.719	8.04601	7.48348	7.97465	7.75592	7.50859	7.6471	7.56687	7.17212	6.66897	9.00665	7.53826	8.84595	6.97229	8.93893	8.62291	6.66545	8.20637	7.45589	7.14654	7.61909	7.37119	8.67915	8.38882	6.96738	7.02781	7.80472	7.05405	7.4635	9.60785
CTB-113P19.4	8.99076	8.30456	8.71687	7.26934	10.3276	8.27815	8.17133	8.62723	7.92938	10.0945	11.7961	10.5729	10.0285	9.2816	8.40005	8.90854	8.94395	9.53026	7.53193	9.27244	8.96267	8.86739	7.76682	9.01115	9.46136	9.23632	10.2965	8.86818	9.25285	9.51393	8.14977	8.46692	9.24845	8.73234	11.453	10.3358	8.38581	9.57005	8.87131	9.1465	8.68983	9.84636	9.03667	7.09854	8.2588	9.19494	8.7847	12.1159	9.13717
LOC105378231	8.99076	8.30456	8.71687	7.26934	10.3276	8.27815	8.17133	8.62723	7.92938	10.0945	11.7961	10.5729	10.0285	9.2816	8.40005	8.90854	8.94395	9.53026	7.53193	9.27244	8.96267	8.86739	7.76682	9.01115	9.46136	9.23632	10.2965	8.86818	9.25285	9.51393	8.14977	8.46692	9.24845	8.73234	11.453	10.3358	8.38581	9.57005	8.87131	9.1465	8.68983	9.84636	9.03667	7.09854	8.2588	9.19494	8.7847	12.1159	9.13717
LOC400043	7.93295	9.90912	8.17355	10.2044	7.3118	8.47951	8.131	6.91378	9.01562	10.1632	7.27752	7.15463	8.95254	9.79745	7.6842	10.9926	8.46603	7.91604	8.30168	8.63133	8.93523	10.4448	8.45098	8.4434	9.33008	9.71945	9.48083	8.59448	7.2364	8.75681	8.37419	8.56362	8.10393	8.18761	7.7331	6.94207	9.71846	7.8148	9.47782	10.0995	10.0059	9.66417	10.2884	8.87408	9.06204	8.9353	10.7684	8.84895	7.35835
RP11-834C11.4	7.93295	9.90912	8.17355	10.2044	7.3118	8.47951	8.131	6.91378	9.01562	10.1632	7.27752	7.15463	8.95254	9.79745	7.6842	10.9926	8.46603	7.91604	8.30168	8.63133	8.93523	10.4448	8.45098	8.4434	9.33008	9.71945	9.48083	8.59448	7.2364	8.75681	8.37419	8.56362	8.10393	8.18761	7.7331	6.94207	9.71846	7.8148	9.47782	10.0995	10.0059	9.66417	10.2884	8.87408	9.06204	8.9353	10.7684	8.84895	7.35835
RP11-758M4.4	8.13112	9.09212	9.46254	8.91418	8.96211	9.8345	10.0145	6.67825	7.01089	8.50213	8.8432	6.55354	7.66289	8.73359	6.5662	9.3594	7.48347	8.76759	8.41707	7.81139	7.25954	9.22476	9.22593	9.19771	9.29845	9.02997	9.0956	8.42027	6.53071	7.79604	8.74341	8.54801	6.92257	7.32084	7.02983	7.74164	8.42894	7.44581	8.86178	8.65914	8.59463	9.52074	9.26632	8.55419	8.58025	8.21702	9.76538	7.67466	8.42213
LINC01116	10.6699	9.44628	7.73562	9.71695	6.97745	9.30328	9.55362	7.70804	8.09335	8.01477	6.98576	8.22366	9.09369	9.09201	7.12696	8.5397	8.72124	7.1002	9.47509	7.73133	7.68271	11.1274	8.41224	9.49715	8.3879	8.1476	8.40915	8.4175	6.94123	8.99096	8.33132	7.95677	7.57959	8.80573	7.41109	6.82922	10.8264	7.4232	8.4798	8.15533	8.17735	8.82099	9.49969	8.27067	7.24639	7.89639	8.1266	8.19477	9.17153
MCF2L-AS1	7.53246	9.07854	8.0881	8.76135	8.54379	7.78594	7.59896	7.90772	8.1346	7.93414	7.44288	6.77584	7.7565	8.38917	6.5662	10.1314	8.23276	6.88618	7.72971	7.60415	8.24016	7.67188	7.49318	10.2961	9.6606	9.03498	7.57628	9.86169	6.94823	9.77273	9.24938	9.22118	9.69807	7.8967	7.36113	6.86576	7.88614	8.31753	8.50645	10.241	10.6242	9.54065	8.68395	7.75783	10.8591	8.70043	9.98259	9.76535	7.27461
MIR2117	7.53246	9.62525	8.02971	9.50511	10.215	7.86072	7.56669	9.74565	7.68158	7.41127	7.70888	6.50784	8.15931	7.49622	9.32633	7.10408	9.31429	7.41759	9.96414	8.21481	9.7636	8.30879	7.74284	10.0073	8.41033	8.48605	9.57471	7.52062	7.92918	9.815	10.1895	9.79688	9.89599	8.44904	6.99589	7.39107	8.40101	9.11415	8.70029	10.1171	8.37323	7.79139	7.96332	8.35688	7.1459	9.6283	7.43702	7.60716	7.59858
MIR2117HG	7.53246	9.62525	8.02971	9.50511	10.215	7.86072	7.56669	9.74565	7.68158	7.41127	7.70888	6.50784	8.15931	7.49622	9.32633	7.10408	9.31429	7.41759	9.96414	8.21481	9.7636	8.30879	7.74284	10.0073	8.41033	8.48605	9.57471	7.52062	7.92918	9.815	10.1895	9.79688	9.89599	8.44904	6.99589	7.39107	8.40101	9.11415	8.70029	10.1171	8.37323	7.79139	7.96332	8.35688	7.1459	9.6283	7.43702	7.60716	7.59858
LINC01705	10.1437	7.65976	7.60326	7.45143	7.03035	8.2415	8.86189	8.10454	7.16402	9.26111	7.11372	6.50784	8.799	7.91732	7.0484	8.83274	8.07214	6.79749	7.71534	7.67903	8.15467	9.65935	9.06326	7.97008	7.76149	8.63732	9.83098	7.22372	6.63271	11.3629	8.83247	8.83105	7.95261	8.13777	7.50951	6.56669	9.2657	7.23116	8.04057	7.98876	7.86691	8.46453	8.67955	7.17893	7.37403	7.32658	7.43716	9.50634	8.038
MIR612	11.1755	11.3678	9.61332	11.1545	10.1531	12.3135	11.7177	12.9432	10.4799	10.2623	10.9167	9.75372	11.0095	12.5441	10.7167	11.6919	13.0605	11.7255	10.2237	10.6789	11.1774	9.55759	9.76942	10.7869	11.2688	10.0072	10.4193	9.67238	12.4153	11.5356	10.1143	12.8218	11.7793	11.9668	11.0721	10.6013	9.46982	9.49548	11.9169	10.0775	10.5859	11.149	9.5925	12.0166	9.30227	10.5834	11.525	11.0839	10.0655
NEAT1	11.1755	11.3678	9.61332	11.1545	10.1531	12.3135	11.7177	12.9432	10.4799	10.2623	10.9167	9.75372	11.0095	12.5441	10.7167	11.6919	13.0605	11.7255	10.2237	10.6789	11.1774	9.55759	9.76942	10.7869	11.2688	10.0072	10.4193	9.67238	12.4153	11.5356	10.1143	12.8218	11.7793	11.9668	11.0721	10.6013	9.46982	9.49548	11.9169	10.0775	10.5859	11.149	9.5925	12.0166	9.30227	10.5834	11.525	11.0839	10.0655
RP11-363E6.3	10.2905	8.15608	8.57839	10.2936	7.7088	11.516	9.00592	10.1883	7.86482	8.16464	7.71283	6.66263	11.5771	11.8799	6.99747	7.41791	11.4501	9.10821	9.14802	9.57468	8.77083	9.43274	8.31688	8.17362	9.24681	8.2101	9.49588	7.58119	8.6561	8.63698	8.22248	8.2535	6.85797	9.24972	8.83304	8.77215	7.94056	8.08269	8.32313	7.99147	8.67696	10.0404	9.67039	8.46616	7.52918	8.98211	11.0368	7.38642	10.5311
RP11-104E19.1	8.447	6.69095	9.26302	7.37677	6.87961	8.20974	7.77863	7.93607	7.19126	7.34073	8.27777	6.50784	8.17149	7.45773	8.34055	7.10879	7.49386	7.95137	7.33178	8.90798	7.93142	8.84221	7.60051	9.85576	10.7891	10.3216	7.10317	7.78008	6.61909	7.9862	8.54249	7.676	6.85797	8.71073	7.32807	6.85051	9.46776	8.36923	9.57296	7.94366	8.21919	7.52324	8.30931	6.80856	7.06092	7.39465	7.1095	7.56791	10.0958
CTD-2619J13.13	8.89115	7.68956	8.8508	9.39796	10.3719	9.28037	12.7529	9.70545	10.6113	9.78524	9.37811	11.2568	12.118	7.94586	9.07441	7.30586	9.55253	9.94681	10.4939	9.05149	10.2527	10.2148	7.93229	9.97482	9.8722	11.0752	8.47035	8.99733	11.729	8.11107	9.31521	8.99141	9.8433	8.86342	11.0169	10.8408	9.46551	10.5343	7.92625	10.3712	8.5906	10.124	11.6114	9.35275	9.07203	10.2752	9.21918	8.47418	9.85309
AC016747.3	7.70061	8.99054	8.04926	9.6047	8.19224	9.83174	8.08291	8.2769	8.59772	7.70251	7.15072	7.09199	9.37338	8.8833	7.80031	8.9285	9.38951	7.38544	8.58502	7.81169	8.33175	10.1445	8.147	8.23702	8.31394	8.7501	10.0931	9.72157	8.23453	9.10859	7.82865	8.76694	7.96522	8.85164	7.90542	7.04667	9.08055	7.3047	9.29229	9.04751	9.41157	9.25116	8.81857	7.74211	9.9339	9.1596	7.75887	8.66264	7.76646
LOC339803	7.70061	8.99054	8.04926	9.6047	8.19224	9.83174	8.08291	8.2769	8.59772	7.70251	7.15072	7.09199	9.37338	8.8833	7.80031	8.9285	9.38951	7.38544	8.58502	7.81169	8.33175	10.1445	8.147	8.23702	8.31394	8.7501	10.0931	9.72157	8.23453	9.10859	7.82865	8.76694	7.96522	8.85164	7.90542	7.04667	9.08055	7.3047	9.29229	9.04751	9.41157	9.25116	8.81857	7.74211	9.9339	9.1596	7.75887	8.66264	7.76646
FZD10-AS1	8.27886	8.9445	7.84955	7.98486	6.97303	8.47946	7.96146	7.13303	8.01672	8.95321	7.52316	6.60665	8.97724	7.47845	6.76657	8.16312	8.10239	7.25697	7.3867	7.91573	9.29318	9.16552	9.35785	9.57828	9.7259	8.14895	7.41997	9.2916	7.0302	8.55479	9.22546	8.11206	7.32293	8.46821	7.30972	6.82946	9.19716	9.24529	9.81541	8.8055	8.03533	8.5155	8.73393	7.15609	8.18739	7.66576	8.36717	8.00619	9.23793
RP11-215P8.4	9.62574	6.65749	7.41893	7.2537	7.50182	8.68195	8.24305	6.68831	7.02833	11.5316	6.94764	6.61512	7.96019	10.6661	8.54872	10.4909	7.49887	7.44581	7.91757	7.28992	7.24231	7.60007	7.83631	8.42466	7.49433	7.6423	8.2099	7.56721	6.53071	8.1588	7.7298	9.77858	9.64277	9.32594	7.59986	8.42757	7.6844	6.8437	7.48456	7.92253	7.37878	8.6914	9.37847	7.13722	9.23288	8.74577	7.03728	8.78867	8.56224
SOX21-AS1	7.84001	9.32511	9.55727	7.96858	8.66659	8.39199	7.51827	9.55589	9.298	8.74558	8.53379	8.41937	8.68018	8.76285	8.40647	9.94209	9.44815	9.62663	8.22484	9.18214	9.95923	7.39954	7.49318	8.63676	10.4682	11.0146	7.25525	9.69708	10.1023	9.57107	10.7858	8.43816	10.0592	9.22552	9.19877	9.09323	8.57174	9.78887	9.70421	11.1689	10.505	9.9478	9.65238	10.2083	7.95516	10.2967	9.63013	8.89771	9.48219
LINC01614	8.40432	10.4819	7.54427	7.69433	6.82421	7.63781	7.37875	6.78533	7.65943	10.2146	7.63749	6.50784	8.00982	8.54924	7.06479	9.94601	7.64433	7.39341	8.80366	8.26323	7.76881	9.99642	10.073	8.77541	8.0974	7.67469	9.89084	7.61575	6.85551	11.3943	7.82628	8.82251	8.02362	8.47938	7.17746	6.66877	9.95253	6.8437	7.82896	7.54342	7.21682	8.1208	7.70032	8.27321	8.04206	7.32333	8.31277	9.53292	8.14282
RP13-401N8.1	8.25152	8.23368	7.85316	8.87763	7.18295	7.67835	7.37875	7.65329	7.31357	7.59434	6.93424	7.60081	8.16567	8.66047	6.98215	8.54327	8.50335	8.16898	7.86135	9.39369	7.47865	9.76864	8.12116	7.87434	10.3796	7.70599	8.14235	8.41803	6.93962	7.41792	8.85056	8.97116	7.79581	7.7697	7.54857	7.87939	7.76755	7.17572	8.78237	8.9895	9.72967	9.659	7.87534	8.49376	7.25325	9.92006	8.40071	7.38642	9.42571
CTD-2228K2.7	11.6328	8.76858	10.2907	10.0225	11.5199	10.5227	8.92259	10.9736	9.15365	8.38465	9.73742	8.17863	10.2767	9.78035	10.2041	8.50606	10.6999	9.77542	9.99124	8.21727	10.929	8.99736	8.31927	9.14423	11.5144	10.5229	9.55457	8.79774	10.3083	8.71448	9.5856	11.0898	10.2593	10.1019	8.47746	8.95348	8.52043	7.92617	9.07139	9.29184	9.65874	10.3847	10.5923	12.147	7.49392	9.42145	8.50369	9.92724	10.0921
SNORD87	9.35558	9.72456	8.44985	10.2923	8.82155	9.66683	9.1114	9.61576	9.62978	9.92509	9.88505	11.3244	8.47336	10.2292	8.21559	10.0673	9.39146	9.53274	8.48799	8.0464	9.39747	8.33347	8.20021	8.6151	9.58643	8.2006	9.27229	9.37112	9.29522	9.63029	9.76336	10.3705	9.66226	10.6904	10.0994	9.44167	8.5129	7.77226	8.99502	9.30982	9.55055	10.1073	8.52735	10.2075	10.0741	9.37596	10.1951	9.32568	9.69755
AF003625.3	7.58522	11.8223	7.6295	10.5009	6.79377	9.91289	8.64007	6.71577	6.9972	10.837	6.91988	6.62209	7.66289	10.9753	6.5662	9.34041	7.47433	6.77793	7.09002	7.36676	7.24231	7.35122	7.49318	8.05035	8.02442	7.76815	10.8666	7.71715	6.70881	8.98506	9.34187	7.33137	6.85797	7.31495	9.24708	6.56669	9.1967	6.92981	7.2486	8.89189	9.9061	9.0696	8.24023	6.75054	7.06137	7.32333	7.10456	10.9012	7.28238
RP11-379B8.1	8.26172	10.2596	10.5103	8.97023	9.94013	9.37015	7.97196	8.13759	8.01943	10.5164	9.23488	7.12826	8.90074	8.36897	7.50089	9.90282	9.28607	10.3694	7.63534	7.56004	9.12907	10.0354	8.79145	8.06433	9.01702	10.7013	8.06754	9.49365	7.9466	9.11128	8.62848	8.88028	8.31747	8.44413	7.0907	7.84014	9.0083	8.62247	7.22311	8.76257	9.51433	9.5653	10.4889	8.69515	9.58852	9.74128	9.7165	8.47885	7.86844
SNHG18	9.3426	9.76319	9.68367	12.2301	8.6144	10.6901	7.84854	9.25266	9.0003	8.64475	8.52954	7.20569	9.37287	10.1264	7.30973	10.5176	9.49504	10.5132	8.84707	9.16475	10.0721	9.48632	8.71899	9.49174	8.56004	8.35577	10.2551	7.63366	10.4013	9.18004	9.90493	8.53432	7.57147	8.20118	8.41659	8.4779	11.6979	9.67765	8.41512	9.15773	11.372	9.95022	11.6759	9.58634	11.0088	9.98413	8.66847	8.60444	8.78749
MRLN	7.42002	6.72132	9.03285	9.30124	10.1783	7.6546	7.37875	6.78628	7.11402	7.32798	8.71919	8.89053	10.3417	7.95456	7.07959	8.53175	7.66483	8.54975	8.80188	9.1116	7.8466	7.60315	7.63248	8.09292	7.5685	7.58133	8.5282	7.19098	10.1104	7.61774	8.19473	9.26313	8.63917	8.92963	8.65027	10.3393	8.16792	7.39536	8.20796	8.1099	7.16813	7.43313	7.71327	7.0885	7.41294	8.5143	7.05734	7.41123	9.02192
LINC01806	8.63393	6.75802	10.0622	8.02403	6.75189	9.38035	8.39728	9.44685	9.13997	8.07042	9.22581	7.65628	9.10869	9.12274	9.23459	9.39893	8.27057	8.90071	8.36823	9.05175	8.74707	9.83684	8.67174	9.71484	7.50017	7.65813	8.42276	8.4356	8.38555	8.5363	7.38286	9.67968	7.95936	8.70173	8.306	8.0662	8.84853	10.4883	8.09166	9.327	10.6816	7.57134	8.33878	8.38206	7.18836	7.71025	8.85008	9.39074	9.62175
PTCSC2	7.40347	8.52406	8.36479	7.75107	7.48923	7.8452	9.24922	7.57947	7.81073	7.62629	9.748	7.80321	8.23709	7.03767	6.67707	8.28596	8.36336	9.06656	7.68908	7.94222	7.63863	7.89028	7.49318	8.41754	8.7141	9.96062	7.18301	8.39967	9.83138	8.88742	9.10708	9.18563	8.06379	8.87372	8.94759	8.37862	7.6844	7.44457	7.76587	8.27922	9.22249	8.23193	8.21688	8.25917	7.89578	9.16257	7.03728	7.4151	8.82033
RP11-400K9.4	7.4778	8.43691	8.40136	8.54669	6.97963	8.38993	7.42832	9.10086	7.99853	7.30652	7.01215	6.55392	9.61944	9.30963	6.66147	8.40335	10.755	8.16819	7.46009	7.62214	9.05656	8.7465	10.4497	9.11744	8.86652	8.15933	7.85333	7.8515	6.89172	7.99963	7.70308	7.68765	6.93757	8.65305	7.72388	6.64343	8.80419	8.53229	9.15116	9.29545	8.56637	7.97088	11.049	7.04024	8.69822	7.72789	11.6005	8.41258	8.7882
LLPH-AS1	8.14234	8.15926	9.54525	8.10075	10.0312	7.67049	9.16043	7.20663	7.91431	7.9854	7.99878	7.35817	8.13065	9.22224	8.88776	9.6916	8.7787	8.60364	8.22438	8.31063	9.32332	10.7231	8.59272	10.2749	9.26006	8.82138	10.5408	9.59352	8.57299	8.62999	9.71068	10.3431	8.19052	8.19919	9.03276	7.2554	8.67378	8.66925	9.68221	8.2213	9.26122	7.71795	8.74016	6.92797	8.54647	8.54093	8.84319	10.3097	9.24836
LINC01468	9.9418	6.67916	7.6486	11.9903	6.7504	7.65747	7.429	7.6993	10.58	8.35664	8.21193	8.43126	8.08747	8.96245	7.91181	7.33338	8.90043	6.93559	7.04997	8.36638	7.56413	7.75584	7.79836	7.59179	7.78574	7.9684	7.1981	7.2901	6.87926	8.18103	7.85891	8.7988	6.85797	8.56101	11.0084	7.13168	8.54055	8.17826	7.5337	8.28583	7.54756	7.49766	7.70749	7.49095	7.64752	7.42531	7.03728	8.51517	7.83051
LOC105369635	9.8204	9.94693	10.3369	9.22325	9.43483	10.3056	10.8406	11.6309	9.65332	10.9779	9.18433	10.1501	9.75102	9.83562	10.0213	9.68663	10.8982	8.77071	9.29652	9.2962	10.1236	10.8578	8.9208	9.98622	9.92145	10.7758	9.21854	10.0129	10.6987	8.39111	9.83912	9.11259	11.2335	10.6414	10.6797	9.78436	10.5196	9.71865	9.11499	9.80486	9.49341	10.3764	9.69748	11.4938	11.2505	9.94539	11.7164	10.7586	11.1201
U47924.27	9.8204	9.94693	10.3369	9.22325	9.43483	10.3056	10.8406	11.6309	9.65332	10.9779	9.18433	10.1501	9.75102	9.83562	10.0213	9.68663	10.8982	8.77071	9.29652	9.2962	10.1236	10.8578	8.9208	9.98622	9.92145	10.7758	9.21854	10.0129	10.6987	8.39111	9.83912	9.11259	11.2335	10.6414	10.6797	9.78436	10.5196	9.71865	9.11499	9.80486	9.49341	10.3764	9.69748	11.4938	11.2505	9.94539	11.7164	10.7586	11.1201
RP11-499O7.7	7.4931	8.05548	8.16624	7.27904	9.22785	8.10328	8.4676	7.68034	7.14088	9.55118	8.36312	8.02022	7.85702	8.85886	6.93614	8.19804	8.27751	7.07671	7.22337	7.4854	8.82224	7.35122	7.49318	10.625	10.0428	8.66816	7.12044	8.70388	7.11272	8.67486	10.1308	10.9632	9.31827	8.63114	7.95924	7.20837	7.81342	7.01435	9.11192	7.48857	7.63507	8.1991	7.8472	7.09076	6.99868	7.74563	7.57487	8.22503	8.85402
LINC00885	7.88131	10.0004	7.77657	7.95244	8.64763	8.2516	7.71499	7.54564	7.39568	7.643	7.95855	7.06683	8.21454	8.02935	6.80652	9.04924	7.75372	7.33858	7.35903	7.54679	9.8781	10.4077	8.19556	9.46276	10.1839	10.0907	7.35443	8.41551	8.45766	8.81304	8.91952	8.88704	9.24952	7.9032	8.84262	6.70496	9.31015	8.23885	7.37726	9.95916	8.32099	8.02539	8.42003	7.6122	8.73422	8.04185	8.94781	9.24672	8.41969
RP11-791G15.2	9.39815	8.23935	8.00602	10.6239	7.88661	8.86818	7.59656	7.59139	8.4245	8.9854	7.45142	7.30437	8.15121	9.2534	6.68373	7.98198	7.73642	7.43355	7.98373	7.81753	8.3762	8.91326	8.83184	8.53231	9.15261	10.3514	8.55876	8.31598	7.42078	10.1639	9.34161	9.38516	9.59547	8.22925	7.80366	7.44213	8.91632	8.17382	9.92736	8.77347	8.22436	8.58414	8.3439	9.20956	9.33624	7.80141	8.29292	9.28298	7.90643
LINC02041	8.7904	9.84952	11.9048	8.63609	8.42921	8.92902	7.91	8.2236	7.5978	7.46372	7.34367	6.96273	7.78977	8.69835	6.74569	8.95366	8.9962	7.49571	7.21514	7.46814	8.59888	8.02686	8.57267	8.20831	8.43323	8.55216	7.23328	7.95281	9.31611	9.57961	8.82191	9.53429	8.0397	9.39777	8.43261	6.76186	8.47245	7.9085	8.29426	9.93837	8.75188	8.66176	8.72125	7.6365	7.36102	8.26798	8.35768	8.0335	8.29084
LINC01564	7.69933	7.94878	9.32718	7.55946	8.95248	7.976	8.65312	8.19071	7.4009	8.40609	9.83617	8.41446	7.99597	8.73729	8.1628	7.17146	7.99456	7.17459	7.23629	8.0315	9.03794	8.00028	8.38486	9.20237	9.89499	10.2284	7.13246	10.311	8.61025	9.60693	10.176	9.5989	9.09896	7.75821	8.5804	8.14527	8.04904	7.99766	8.13685	8.02555	8.01019	8.11348	7.73301	7.08652	7.64035	9.14555	8.40043	7.76236	9.16163
LINC01752	7.50382	9.12666	8.8678	7.76701	9.88485	8.23412	10.4793	9.68568	7.86052	9.36471	10.3012	7.53448	8.62711	7.3736	9.27486	7.56469	8.53854	9.10215	8.15956	8.68716	8.29046	9.4922	7.82772	9.54019	9.4684	9.39887	7.23987	9.20166	8.87236	9.16789	8.20647	9.70013	8.94018	9.54373	9.15698	9.54934	8.51681	8.18657	8.64309	9.07331	7.91583	8.87019	9.45028	7.41588	8.2641	8.95838	7.61431	8.58151	10.3888
MIR210HG	12.0426	9.3734	9.0038	11.0355	9.75205	10.2865	11.8842	10.5897	9.49536	10.2061	10.3059	9.42575	10.44	10.9955	9.39245	8.56723	10.4484	8.84269	9.30394	8.26141	10.2079	9.65654	9.38304	9.87986	10.5496	9.03349	9.78686	7.65951	8.77814	8.96654	9.21303	10.623	8.88851	9.83549	9.49212	8.21805	9.02826	8.74382	9.43836	10.0438	8.44216	9.86125	9.66989	8.91837	9.38607	9.91564	8.04925	10.2982	10.5741
MIR663A	7.49033	7.64626	8.1254	7.74819	8.00224	8.50985	8.90815	6.83009	7.86504	8.69777	7.20899	8.6323	8.17499	8.98125	6.92878	7.56524	8.84831	8.66407	9.33885	9.81385	8.0761	9.22274	10.2911	9.02289	8.23954	8.07106	8.30244	8.61393	7.9577	9.363	8.08814	8.71267	7.53481	8.92941	7.17909	7.53034	8.37605	6.85891	7.3044	7.757	8.21254	7.63521	7.87727	10.3756	10.9374	8.02043	10.4916	9.70797	9.04284
MIR663AHG	7.49033	7.64626	8.1254	7.74819	8.00224	8.50985	8.90815	6.83009	7.86504	8.69777	7.20899	8.6323	8.17499	8.98125	6.92878	7.56524	8.84831	8.66407	9.33885	9.81385	8.0761	9.22274	10.2911	9.02289	8.23954	8.07106	8.30244	8.61393	7.9577	9.363	8.08814	8.71267	7.53481	8.92941	7.17909	7.53034	8.37605	6.85891	7.3044	7.757	8.21254	7.63521	7.87727	10.3756	10.9374	8.02043	10.4916	9.70797	9.04284
RP11-400K9.3	7.4065	8.18212	8.10423	8.35764	6.84296	8.29041	7.61498	8.89243	7.89522	7.375	7.09909	6.54702	9.21527	8.92896	6.61548	7.93381	10.1671	7.86006	7.25254	7.4669	8.7959	8.71694	10.0905	8.74535	8.77499	7.88181	7.68584	7.7783	6.69982	7.73795	7.60581	7.77802	6.85797	8.78094	7.70269	6.58484	8.66371	8.4299	8.59243	8.88602	8.5369	7.7725	10.598	6.90695	8.62459	7.47547	11.1275	8.13366	8.70093
AC073046.25	9.24764	9.0308	10.6134	8.47841	7.40072	8.34818	7.83756	8.20044	9.26918	9.54649	9.21182	7.08286	10.0278	9.2762	8.63054	8.84174	10.9891	10.1227	9.83491	10.9372	10.8503	9.66017	8.8851	10.7183	10.9729	11.2351	9.12101	9.87208	9.86127	9.84225	10.9654	9.72486	8.8799	7.95201	7.95328	8.14005	9.95581	10.2704	10.0848	10.4824	10.6476	9.94014	9.86118	11.2918	9.4918	10.3331	10.6618	9.88949	8.83551
RP6-65G23.3	9.7784	7.61983	10.7125	10.4548	9.40046	8.26321	11.9349	10.2281	11.5524	8.50414	10.0199	9.34114	10.6577	9.52337	9.94679	8.91287	9.39074	10.458	9.07526	9.59969	9.28665	8.89409	9.16737	8.86503	8.93608	10.0513	11.1885	7.9944	11.7811	8.74929	8.29045	8.90441	8.98589	8.95757	11.432	10.6336	10.6865	10.6029	8.80416	10.5226	9.57024	9.18069	10.0796	8.32653	8.44155	9.54005	7.89872	8.15561	10.6794
UNC5B-AS1	8.9318	6.98316	8.3194	9.67335	9.06632	8.96441	10.8651	8.88485	7.99046	8.54505	12.4481	11.528	8.45838	7.82296	8.25963	8.91406	8.76585	8.73999	9.85505	7.32756	7.79871	8.92401	8.45408	8.72642	9.65459	8.3587	8.01586	8.13258	7.09672	8.63613	11.0431	8.86941	7.05159	9.9064	11.1518	11.1256	9.07589	6.98411	7.97489	10.4542	9.88985	8.88359	8.22038	10.5771	9.62326	7.58244	9.00764	9.2892	8.46275
GATA2-AS1	9.58709	8.2189	9.34285	8.75192	8.26535	9.28682	8.1147	8.95193	7.45069	7.36315	7.95767	7.47715	8.24482	8.62707	6.9448	7.26211	8.07122	9.59205	7.99624	8.54368	7.8978	9.25123	9.53666	9.27507	9.2919	10.442	8.64508	9.33054	9.2964	8.80639	8.55335	8.93612	8.38716	8.35234	7.15555	7.16951	9.16439	7.11222	8.98808	10.0646	9.11567	7.69281	10.409	9.58927	7.51866	7.71144	7.45727	7.63817	7.33997
RP3-460G2.2	8.07037	9.93173	9.3202	8.7558	6.72382	7.88977	7.37875	7.14529	7.29365	7.54287	7.02614	8.68152	8.91885	7.52217	10.6233	7.52375	7.84904	7.13664	7.13032	8.06031	9.74928	10.0266	7.93171	7.81878	8.92924	8.39504	9.39705	9.84776	8.29521	8.18481	7.64051	7.92005	7.55567	8.03738	8.22661	8.46728	8.18893	8.22222	7.12078	8.72854	8.62239	7.50096	7.74327	10.1035	10.1647	11.0848	7.32757	7.42684	9.61775
LOC101927136	7.40347	6.65749	7.81314	7.30914	9.592	8.08458	7.37875	6.7829	7.06673	7.68655	6.84898	6.54994	7.66289	9.66257	8.16435	7.07717	7.51181	6.74506	6.98659	7.25462	10.9853	7.3968	7.49318	12.1784	10.5004	9.37661	7.10317	12.6109	8.06866	11.9703	9.65754	8.93952	9.7651	7.31495	7.46833	7.59152	7.6844	6.8437	8.75634	7.32499	7.73626	10.4337	7.69964	6.75054	6.99868	8.55117	7.03852	7.47647	11.2051
RP1-27K12.2	7.40347	6.65749	7.81314	7.30914	9.592	8.08458	7.37875	6.7829	7.06673	7.68655	6.84898	6.54994	7.66289	9.66257	8.16435	7.07717	7.51181	6.74506	6.98659	7.25462	10.9853	7.3968	7.49318	12.1784	10.5004	9.37661	7.10317	12.6109	8.06866	11.9703	9.65754	8.93952	9.7651	7.31495	7.46833	7.59152	7.6844	6.8437	8.75634	7.32499	7.73626	10.4337	7.69964	6.75054	6.99868	8.55117	7.03852	7.47647	11.2051
RP11-132A1.4	7.77184	9.21769	10.4183	11.5753	10.5513	9.74591	9.47638	9.7621	11.7782	11.0649	10.6668	10.8457	10.5989	10.7456	9.98672	11.1716	9.4009	10.9487	10.4611	11.4548	9.71281	9.50519	11.0018	10.7629	9.88648	9.50688	8.82269	10.7089	9.77258	10.9013	8.98108	11.715	9.86013	11.9705	10.6308	8.28573	8.52294	9.16896	10.8584	9.43119	9.18968	9.02932	10.4172	8.9015	10.1084	10.0983	9.22052	12.4676	10.542
LINC00460	9.54156	6.86715	7.45947	11.4903	6.73927	8.53521	9.06365	6.98234	8.0738	7.54325	6.87833	6.61618	8.41554	7.99448	6.74885	8.80176	8.80789	6.83346	7.65617	7.91729	7.34711	10.5444	8.37858	7.36382	7.51815	7.66903	8.74382	7.18437	6.56887	8.24032	7.32491	8.19324	7.11974	7.42196	7.23699	6.625	11.064	7.25414	7.11772	7.60289	7.26661	8.93696	7.88122	7.07187	8.39989	8.11761	7.12363	9.62073	8.25016
LOC105369340	11.0914	8.79412	11.0348	11.2675	10.9334	11.2438	12.8556	11.8637	9.71509	11.3569	11.2066	9.8597	11.9876	9.87746	10.0225	9.0903	12.133	10.247	10.7655	10.3385	9.45687	10.4764	10.9134	9.60717	9.60301	10.4657	10.5562	8.8601	10.7417	9.73053	9.87805	10.3166	9.85302	11.4655	10.3549	11.3237	11.5585	10.4573	9.43655	11.1798	9.79638	10.9755	11.2211	10.3025	9.98459	11.2029	8.61074	9.33568	10.7224
RP11-783K16.5	11.0914	8.79412	11.0348	11.2675	10.9334	11.2438	12.8556	11.8637	9.71509	11.3569	11.2066	9.8597	11.9876	9.87746	10.0225	9.0903	12.133	10.247	10.7655	10.3385	9.45687	10.4764	10.9134	9.60717	9.60301	10.4657	10.5562	8.8601	10.7417	9.73053	9.87805	10.3166	9.85302	11.4655	10.3549	11.3237	11.5585	10.4573	9.43655	11.1798	9.79638	10.9755	11.2211	10.3025	9.98459	11.2029	8.61074	9.33568	10.7224
LINC00958	12.708	9.50085	10.2495	13.7097	11.5697	11.4924	11.2093	10.9141	10.9528	11.5793	11.4243	10.7683	12.1535	12.3925	10.7955	10.566	12.3705	9.28886	11.6248	12.287	10.8961	11.6296	7.52492	10.4054	10.9927	11.6479	11.661	7.14167	10.5894	9.09934	9.44883	11.0835	11.4708	11.8143	11.4878	11.6979	11.3614	11.207	10.9345	11.8419	10.4762	10.002	10.582	9.93007	10.0448	10.8592	10.6639	9.85745	11.2495
CTA-520D8.2	8.235	6.80008	7.41893	8.79081	7.81083	7.70562	7.70461	6.64609	6.9972	7.69838	7.44864	6.91698	8.59414	8.04226	6.6864	8.87234	8.24852	6.82214	8.05856	7.65829	7.24231	10.4382	9.73467	9.42434	8.31837	7.58133	7.87574	8.01236	8.92463	9.14579	8.50511	8.63867	7.06632	9.151	8.72066	8.42255	8.75117	8.55612	8.34951	7.97217	8.08816	8.80157	8.61165	6.93088	7.41497	7.7869	7.03728	7.91473	9.32558
MIR22	11.485	10.477	10.3912	10.9177	10.8849	11.1845	9.8881	11.8643	10.9686	9.87625	9.82203	9.23172	10.5864	9.81687	10.0427	8.84819	11.5448	9.48186	11.0281	10.6669	10.21	11.4401	10.1498	9.87892	10.7211	11.5668	10.2778	10.171	9.44218	10.7859	10.2843	9.33793	9.92731	10.6484	10.1353	10.4504	10.9023	9.60619	10.0953	9.88662	9.81936	11.0889	10.3967	8.80703	9.63242	10.5578	9.70124	10.4197	10.7411
MIR22HG	11.485	10.477	10.3912	10.9177	10.8849	11.1845	9.8881	11.8643	10.9686	9.87625	9.82203	9.23172	10.5864	9.81687	10.0427	8.84819	11.5448	9.48186	11.0281	10.6669	10.21	11.4401	10.1498	9.87892	10.7211	11.5668	10.2778	10.171	9.44218	10.7859	10.2843	9.33793	9.92731	10.6484	10.1353	10.4504	10.9023	9.60619	10.0953	9.88662	9.81936	11.0889	10.3967	8.80703	9.63242	10.5578	9.70124	10.4197	10.7411
MYOSLID	9.13285	8.2678	9.0929	13.025	8.12399	9.39063	9.17248	9.76872	8.10085	10.2556	8.54563	7.54695	9.12975	9.93452	9.46145	8.00947	9.59401	7.71141	8.41499	9.68554	7.85457	10.4123	9.56843	8.34305	8.30417	8.34632	12.9054	7.98656	8.05053	9.66676	7.973	8.32773	7.61171	9.12575	10.7268	8.19973	11.5017	8.20077	8.49294	9.42325	8.43677	9.11298	9.60392	8.14766	7.65009	8.67392	8.40482	8.78039	10.2751
LINC02081	10.0751	7.44713	7.46853	10.0135	6.94267	8.7722	8.44771	6.7439	7.5695	9.43754	6.84898	6.69379	8.01165	8.29881	6.7886	8.42858	8.70356	6.87951	8.03214	8.15122	7.51487	9.70143	9.49734	7.59001	7.69215	7.58133	8.88987	8.30974	6.66872	8.08201	7.46431	8.62403	7.20995	8.25247	7.56327	8.08124	9.68811	7.7618	7.32358	8.36987	8.33389	8.19328	7.69206	7.24949	7.96331	8.40616	7.39916	7.76403	9.49584
RP11-7K24.3	10.5917	8.02246	9.64628	9.30751	10.2893	11.2215	10.8014	9.49876	9.3642	9.03703	9.48311	9.10614	12.3032	9.74865	9.86994	7.97325	11.2298	9.59536	10.8137	9.25104	9.9737	9.14778	8.91007	9.87656	9.50042	10.9631	9.15753	9.13418	11.6061	10.0879	10.099	9.1056	8.35795	11.0355	8.56649	10.0168	8.55684	10.0112	8.5456	10.6899	8.96135	10.8047	11.5555	9.14634	8.15157	10.1902	7.54055	10.0545	9.04042
BMS1P17	9.11475	9.43514	8.56751	9.75249	6.83487	8.69034	7.48821	7.83158	7.76915	7.8644	6.93147	6.87537	9.26506	9.28759	6.75465	8.53643	8.99732	8.222	7.626	8.89725	8.91155	9.60421	7.70528	8.49994	11.2822	7.70462	9.56947	8.29729	7.59445	9.34844	8.8539	7.93363	7.1047	7.41011	7.92406	8.30376	8.63139	7.61017	9.38629	8.28924	9.66261	8.93701	8.93131	9.21709	8.10437	9.388	9.36234	8.41351	8.48468
LINC00342	8.15777	9.87327	8.30237	8.23812	8.57587	8.59431	7.76805	10.8989	8.83155	8.58305	9.0357	8.07408	8.37732	9.26345	7.79057	8.4482	11.1559	9.41322	7.76597	8.10022	9.37271	7.98163	7.77791	9.8555	9.83322	7.99066	8.02295	8.14517	9.36483	8.83622	9.04652	9.13136	9.73865	10.0903	9.10995	8.71384	8.15297	7.57147	8.61085	9.13064	9.05698	8.93216	8.48463	8.91433	7.86422	9.37981	7.8797	9.01253	8.55156
CTD-2521M24.6	8.23959	7.7197	9.99827	9.79523	8.61159	9.13828	7.37875	7.7637	8.42152	7.59108	9.12326	7.1715	9.14592	9.02883	7.97028	10.4544	9.20834	8.72733	7.66818	9.09661	10.0132	8.16174	9.11504	8.08551	10.4337	7.9524	7.89742	9.99003	9.35834	8.64522	8.02333	7.87128	8.96587	9.46213	9.0628	9.01273	9.37488	8.59979	7.82971	8.48455	9.4744	8.90256	9.78296	8.38511	8.6291	9.20577	8.67614	9.60239	7.58332
HAGLR	8.89033	9.03395	8.29626	9.33856	8.65274	9.2357	7.70884	8.12517	7.66835	9.43906	7.48732	8.79058	8.45568	8.29564	7.1363	9.70509	8.65847	7.19098	8.32048	7.82807	8.05223	10.6576	8.22301	10.6062	9.08071	8.30831	8.07205	10.2806	6.81882	9.12014	10.5055	8.44775	9.42098	9.29168	7.24929	7.28894	10.0569	8.19642	10.1136	9.2154	8.13399	8.38094	8.89981	9.0848	7.23817	7.78531	9.51752	7.81073	9.04605
PCED1B-AS1	7.8755	7.85533	8.15915	7.61095	7.62047	9.85195	8.60833	7.28463	10.7989	7.69428	7.33137	7.30315	8.87243	8.44104	6.8746	8.36637	9.00364	8.6358	7.99827	8.37552	9.271	8.24471	8.71366	8.58183	8.96056	8.7758	8.34306	9.07332	6.80379	8.95385	8.07151	7.74437	8.12493	9.08325	8.73972	7.06857	8.66488	7.78739	7.83191	8.82629	8.86424	9.1794	9.30193	7.31602	8.9999	9.19518	8.74744	10.3282	8.08672
POLR2J4	11.6203	10.7376	11.0206	11.2069	10.924	11.4137	11.5705	11.1189	11.5812	9.77166	11.4773	9.78615	12.4989	10.7291	10.9797	11.5808	12.3394	12.0105	11.7725	12.5547	11.5022	10.556	10.4069	11.1006	13.0805	13.0777	10.192	10.4751	12.5723	10.5316	11.6204	10.9429	10.7783	11.742	12.1413	11.9359	11.1426	13.7064	12.2317	11.9155	11.4448	12.2562	11.6916	10.8185	10.6922	10.601	10.6412	11.0893	12.2577
CASC9	9.30698	10.8129	10.437	10.619	10.529	11.358	10.067	9.71459	8.0096	10.11	9.79466	9.38265	10.7207	10.1401	8.80175	10.5737	10.3331	10.4325	9.89303	8.66587	9.18642	11.151	10.9681	10.2164	11.3246	10.9602	9.39705	9.94398	6.57456	10.0836	10.2651	11.0515	6.87445	11.3952	10.7729	9.4706	9.73497	9.88191	10.1799	9.61447	10.9509	10.689	10.5283	9.16446	10.9626	10.3414	12.0362	8.70564	11.2612
RP11-660L16.2	7.70955	11.1948	11.1014	9.59024	8.74947	9.7282	9.15797	9.89421	9.70957	8.9566	10.06	8.23766	8.31762	8.92997	8.96154	12.4048	9.88952	9.16175	9.6112	8.19856	8.43802	10.3432	9.9436	10.6002	10.6315	8.19611	9.40975	8.79003	9.21988	11.333	9.93348	9.64386	8.09618	11.5728	9.69283	8.36464	12.6681	8.30803	8.18761	11.1279	9.79382	10.5045	10.0193	9.43612	13.1821	10.7467	9.83413	8.78543	10.1182
LINC00467	9.65359	9.84371	11.3445	9.70201	9.79836	10.9638	9.649	10.8405	9.65456	9.19222	9.11352	8.42473	8.84913	9.65201	7.75482	10.9092	9.56761	8.77532	9.12924	7.7156	8.91323	9.01514	9.81295	10.2567	9.13907	10.4597	9.89725	9.46851	9.02609	10.2085	9.48903	10.4724	8.74101	10.6758	7.92688	8.09933	9.98182	8.29993	8.71532	9.22609	9.88015	9.86312	9.88098	8.65732	9.63696	8.4159	9.56739	8.75526	9.63969
RP11-197K6.1	7.40347	10.3079	7.97599	10.2265	9.98794	7.63781	9.09025	9.3415	6.9972	7.31719	9.85393	10.1971	7.70338	7.18397	11.975	7.03912	7.47433	9.61103	6.94534	10.6173	10.8793	10.8031	7.49318	7.38037	7.5825	8.23625	10.0583	7.17489	8.66587	7.34877	7.29626	7.2346	6.88197	7.31495	9.57963	8.92758	7.88103	9.17839	7.01734	9.02407	7.35021	7.2834	7.62438	8.3459	8.12522	11.6275	7.03728	7.38642	7.1692
LOC101927189	8.82535	7.47167	9.28201	7.39625	7.65408	8.8429	9.08057	8.41818	7.67439	7.26173	8.22131	7.2708	10.8	7.41812	6.99725	7.23542	8.21653	7.22189	8.53119	8.65872	9.16831	10.4387	7.56503	8.46246	8.8368	9.41528	7.1878	7.69726	9.14777	8.55191	9.28647	7.795	7.11814	8.07391	7.56528	8.96012	8.18075	8.73349	7.24523	8.41076	7.92208	9.00539	10.0008	6.97254	8.08851	8.75391	8.25255	7.71365	8.51147
RP11-411K7.1	8.82535	7.47167	9.28201	7.39625	7.65408	8.8429	9.08057	8.41818	7.67439	7.26173	8.22131	7.2708	10.8	7.41812	6.99725	7.23542	8.21653	7.22189	8.53119	8.65872	9.16831	10.4387	7.56503	8.46246	8.8368	9.41528	7.1878	7.69726	9.14777	8.55191	9.28647	7.795	7.11814	8.07391	7.56528	8.96012	8.18075	8.73349	7.24523	8.41076	7.92208	9.00539	10.0008	6.97254	8.08851	8.75391	8.25255	7.71365	8.51147
RP11-395G23.3	8.02241	7.8845	9.92496	8.57999	7.28816	8.10412	8.51919	7.93794	8.16385	10.3039	10.6343	8.765	8.3519	9.85968	9.65773	7.72384	8.72342	8.15795	8.04541	9.61829	8.43653	7.99448	8.50105	9.0886	8.40158	8.41761	8.62006	8.5443	7.93658	10.0204	8.58821	10.2518	7.88827	8.76351	9.84352	9.06858	9.35621	8.23328	9.18885	9.47816	8.65097	8.2441	8.7657	8.99472	7.90436	10.1769	8.28941	8.00979	10.1225
RP11-445P17.8	7.85261	6.86345	7.63604	7.38649	7.11841	7.95384	7.75887	6.96598	6.9972	7.90092	7.09165	6.5607	7.75423	7.53971	7.16422	7.77231	7.6166	6.88732	7.07149	7.5329	8.31157	7.63101	7.62331	10.9907	9.15986	7.93302	7.21937	8.71307	6.85164	8.43942	8.84029	9.67721	7.61361	7.74534	7.94663	6.94405	7.74496	7.06662	8.47525	7.65811	8.80402	8.15817	7.85707	6.82937	7.34306	7.63215	7.24597	7.95755	9.32374
RP11-34P13.14	10.4434	9.55651	8.99916	9.08476	8.46024	9.16619	7.55401	9.208	8.79055	8.19282	8.59155	6.56439	9.27761	11.324	8.65537	9.59028	10.4022	11.2293	9.15455	8.76258	10.2688	8.98785	8.52146	10.6927	10.6207	8.66188	9.11161	10.7724	9.58116	9.64051	10.8886	11.6493	9.12133	8.91155	8.3219	7.82082	8.44978	7.8311	10.7688	9.43009	9.48098	9.59273	9.01951	10.5648	8.21249	8.8517	9.6326	8.67057	8.37091
MELTF-AS1	8.37675	10.4261	10.3475	8.37305	8.40026	8.43939	8.51377	9.1633	8.11383	9.66002	8.63627	8.24988	7.87769	8.70466	7.24034	8.88844	8.37991	8.66094	7.89332	8.02297	10.3697	9.86789	8.38192	10.1119	9.82363	8.95881	8.64675	9.76349	8.47142	9.65293	10.0883	10.5739	10.2382	8.9687	9.52153	8.3894	9.44346	7.92332	10.2649	10.0512	9.66927	9.70431	9.93452	9.58061	10.0926	10.7259	9.00379	9.97849	9.57198
VPS9D1-AS1	8.09815	8.85205	13.1611	11.5082	11.1495	11.0368	10.7309	10.1776	11.0651	10.9652	10.4801	9.92141	10.6957	10.5872	11.3062	10.3769	11.4115	11.0374	11.0399	12.2346	9.92775	10.072	7.65564	12.1443	10.9954	10.4743	11.1089	11.0907	11.3274	9.11385	11.352	11.7379	10.6332	9.94087	11.252	10.0275	10.7532	10.3918	10.4038	12.1258	11.4524	11.0298	10.269	10.4786	11.4674	9.31091	7.77527	12.0108	10.7583
AC073957.15	9.67371	8.78508	8.50368	10.0565	9.02825	7.85081	7.53519	6.64609	6.9972	7.12255	7.88076	6.50784	8.37468	9.03189	8.41587	9.00087	7.47433	7.52748	8.39046	7.24654	7.31829	7.35122	7.82597	9.36692	7.47211	7.58133	9.0946	7.24936	8.27069	7.38927	7.27173	10.0928	6.85797	7.39255	8.38886	9.12025	8.86151	7.55339	7.08373	7.38585	7.34835	8.5612	8.26597	6.81877	7.42112	8.10067	7.03728	8.43604	9.23813
CTD-3252C9.4	12.1304	12.3037	9.20583	11.9684	10.6335	12.0531	11.2355	12.6606	10.4978	12.153	10.8861	10.1423	10.2217	11.9134	10.0711	12.2616	12.2624	10.5406	10.5868	9.91405	10.4196	9.5428	9.01824	10.4563	12.2512	9.8434	10.3478	9.74773	10.2431	11.4312	10.3716	11.4168	11.6855	11.842	11.4063	11.9032	10.9787	9.52592	11.2844	10.2788	11.0402	10.9685	10.2045	10.3558	9.58938	10.6762	9.8295	11.2272	10.4094
MIR24-2	12.1304	12.3037	9.20583	11.9684	10.6335	12.0531	11.2355	12.6606	10.4978	12.153	10.8861	10.1423	10.2217	11.9134	10.0711	12.2616	12.2624	10.5406	10.5868	9.91405	10.4196	9.5428	9.01824	10.4563	12.2512	9.8434	10.3478	9.74773	10.2431	11.4312	10.3716	11.4168	11.6855	11.842	11.4063	11.9032	10.9787	9.52592	11.2844	10.2788	11.0402	10.9685	10.2045	10.3558	9.58938	10.6762	9.8295	11.2272	10.4094
LINC01679	9.82914	7.97695	8.40086	9.36494	7.29475	9.68721	7.94882	7.50095	8.70764	8.24951	7.90004	7.41254	8.6267	8.91531	7.11621	8.61562	9.76242	7.28122	8.04415	7.84918	8.74085	9.66784	8.76095	7.87079	8.54286	8.28615	8.1885	7.63812	7.41062	8.15604	8.03798	8.02773	8.73961	8.99343	8.21954	7.25661	9.76373	7.62988	7.76249	8.10682	8.74422	8.6232	8.74872	9.74977	9.38993	8.19009	8.78701	9.4299	9.66878
MALAT1	11.8523	12.4444	10.2725	12.1098	11.5659	12.2729	11.9827	12.4773	11.6692	11.9183	11.051	10.0827	11.9313	12.4261	11.0744	11.6793	12.7815	11.5187	10.835	10.467	11.7617	10.1574	10.3973	11.2836	11.5338	11.0846	10.5851	11.0931	10.7134	10.8441	10.7293	12.4274	11.9959	11.9973	10.925	9.72079	10.8255	9.65721	12.1236	11.2379	11.4494	12.6931	10.6735	10.6117	10.2581	11.8749	11.9858	10.9877	10.6966
SNHG19	11.561	11.0735	11.8152	11.7591	11.194	12.0588	12.8369	12.2286	12.6752	13.9727	13.4565	12.5915	12.4942	12.4634	10.0642	12.2619	11.0916	11.2423	10.4543	10.7651	11.5189	11.2666	11.3266	12.6362	11.5761	12.4584	12.0602	11.7821	12.005	11.4661	12.5386	12.5444	13.0187	11.4792	12.2368	11.8439	12.3996	8.96099	11.0098	12.052	11.2461	12.7019	13.0231	12.5444	13.1404	11.186	11.446	11.0957	12.4669
RP11-337N6.1	7.40347	8.26404	7.46145	8.00766	7.82186	8.18726	7.99095	6.8406	7.02627	8.99155	6.97456	6.5405	7.9361	7.83476	6.5662	7.03912	7.5872	7.24808	7.10504	7.24654	7.63883	8.21092	9.08347	7.99294	9.10917	7.72199	7.10317	9.99918	8.15314	11.1143	8.63914	7.48483	7.10368	7.32984	8.3356	7.16362	8.5504	7.43302	10.6593	8.18406	8.2401	8.25502	7.9193	9.04814	7.05111	10.4563	7.12631	7.49034	8.39375
AC128709.3	8.01653	10.041	9.69736	7.2537	11.0219	7.68421	8.11303	7.049	7.12835	7.28027	9.70553	7.10838	7.74803	7.42399	7.1223	7.641	7.5607	9.35412	7.87154	7.81763	9.07661	8.18821	7.49318	8.62402	9.06904	8.1436	7.19051	7.31742	9.59472	8.40777	8.65363	8.239	9.41087	7.56039	10.1377	9.34815	7.91498	10.1553	9.01689	8.86503	9.12166	8.2276	7.7122	8.12655	7.52001	10.7731	7.17019	8.10524	7.91542
HAGLROS	8.55835	9.13961	8.6044	8.77127	8.35792	9.46276	7.79554	8.33658	7.4496	9.05297	8.37972	9.40071	8.62422	7.72134	6.64609	8.08177	8.088	6.96737	8.58151	7.60535	8.03726	9.99347	8.68036	9.51946	9.28947	8.22789	7.98093	9.29698	6.70468	8.21055	9.35377	8.15517	8.53287	9.00565	7.44668	7.18005	9.85988	7.90613	9.3941	9.04909	8.51405	8.08679	8.03131	9.50223	7.2215	7.4517	9.31178	7.62527	9.26642
LOC102724094	8.08729	10.5885	8.14199	9.46838	7.53793	8.5121	8.08403	8.19152	9.64553	7.60028	8.86722	6.67293	8.06759	8.17275	6.80121	10.6965	8.70846	7.64155	7.71243	7.73964	8.68918	8.37996	8.54513	8.21806	8.53888	7.84842	7.89685	7.47251	9.11553	9.72252	7.84292	8.89576	8.71283	10.3183	9.27254	7.03006	8.30593	8.76885	7.18618	8.81243	7.88767	9.6264	8.30503	8.42092	9.47489	10.3294	7.53741	8.88332	9.15338
RP11-395B7.4	8.08729	10.5885	8.14199	9.46838	7.53793	8.5121	8.08403	8.19152	9.64553	7.60028	8.86722	6.67293	8.06759	8.17275	6.80121	10.6965	8.70846	7.64155	7.71243	7.73964	8.68918	8.37996	8.54513	8.21806	8.53888	7.84842	7.89685	7.47251	9.11553	9.72252	7.84292	8.89576	8.71283	10.3183	9.27254	7.03006	8.30593	8.76885	7.18618	8.81243	7.88767	9.6264	8.30503	8.42092	9.47489	10.3294	7.53741	8.88332	9.15338
CTD-2547L24.4	8.73514	7.05525	8.55127	8.76711	7.97226	9.10307	9.36092	8.4711	8.10376	7.34409	7.65229	6.97731	8.89185	9.28315	6.67972	7.33941	9.11507	7.30918	8.87636	8.74902	8.14396	9.95927	10.7872	7.72917	7.73002	7.79707	9.15671	7.54813	7.94582	8.05666	7.51082	8.34923	7.51438	8.04621	7.9135	8.27493	10.7992	8.52491	7.40695	8.27075	7.64901	8.49881	9.28706	6.90142	7.08168	8.19136	7.1772	8.20854	8.26472
SAPCD1-AS1	8.19939	7.14148	9.54778	9.1906	9.05094	8.79559	7.37875	7.8499	8.82308	8.12901	7.51524	8.26166	8.13219	7.36911	10.047	7.64731	10.0235	8.48672	7.54561	8.0851	9.39732	10.4659	8.06839	9.24759	8.83507	9.47411	7.45993	8.09516	6.84622	8.03717	8.5405	8.18868	9.42068	7.96833	8.22559	7.83014	9.05735	8.15493	7.37683	8.23028	7.52455	8.4952	8.60107	9.08315	7.4707	10.9538	7.68659	9.15384	7.62925
LINC02178	8.47626	6.6806	8.18123	8.60783	7.1041	10.2896	12.5319	8.49664	8.10751	7.76916	8.49175	8.02329	9.34128	8.37501	7.47099	7.11614	8.89694	8.18378	9.61949	7.8432	7.65037	7.7348	7.96227	7.54531	7.52484	7.76157	7.67181	7.13203	8.46444	7.93397	7.46017	7.27226	6.85797	8.95096	8.30717	8.1402	9.33795	7.31109	7.09805	8.43387	8.45609	7.92405	8.66728	7.03932	6.99868	7.54198	7.03728	7.51642	7.56523
RP11-157P1.4	9.88919	9.68787	8.87793	10.9751	8.94435	10.3212	10.2566	9.93182	8.28451	8.81871	10.024	9.32516	8.7769	11.1506	9.13042	9.6772	10.3241	10.053	8.50851	8.3174	9.05698	8.65889	8.6152	8.82865	9.79373	9.19994	9.09236	8.41176	9.26657	8.30538	9.51247	9.58797	10.8481	11.3298	10.0545	8.59722	8.83991	8.8524	9.27616	8.34416	9.2303	9.5905	8.7126	9.37304	8.3804	9.02375	8.40629	8.06967	10.3654
MIR205	12.5584	12.1238	12.2303	11.5866	12.7219	12.6742	12.2362	12.2526	11.8685	10.3183	11.0502	12.1561	11.7486	12.8953	11.8684	11.7983	12.3553	11.2539	10.2743	11.3474	11.5275	13.7155	11.0533	11.276	11.4303	10.9389	11.2859	11.3132	9.59259	10.031	10.8721	10.8536	12.2486	12.8	10.8871	11.5323	12.6214	11.0102	10.7346	10.5553	9.61618	13.167	11.5611	11.6275	13.0252	13.281	11.3318	14.1006	12.8284
MIR205HG	12.5584	12.1238	12.2303	11.5866	12.7219	12.6742	12.2362	12.2526	11.8685	10.3183	11.0502	12.1561	11.7486	12.8953	11.8684	11.7983	12.3553	11.2539	10.2743	11.3474	11.5275	13.7155	11.0533	11.276	11.4303	10.9389	11.2859	11.3132	9.59259	10.031	10.8721	10.8536	12.2486	12.8	10.8871	11.5323	12.6214	11.0102	10.7346	10.5553	9.61618	13.167	11.5611	11.6275	13.0252	13.281	11.3318	14.1006	12.8284
MIR4458	8.57834	8.852	9.27728	7.28738	7.89631	7.75706	8.44958	7.57213	7.91494	8.07278	8.56661	8.55268	7.71821	8.90069	7.96159	7.99589	8.32662	8.80824	8.24065	7.99394	8.29912	8.30787	8.12145	7.56909	7.53983	8.6525	7.54803	7.24291	8.35066	8.17187	7.44755	7.61328	8.04364	7.42758	8.71356	7.66234	9.597	6.97674	7.11986	8.14885	8.76389	8.30466	8.98852	9.43493	9.57618	8.10142	8.18236	7.61079	8.23062
MIR4458HG	8.57834	8.852	9.27728	7.28738	7.89631	7.75706	8.44958	7.57213	7.91494	8.07278	8.56661	8.55268	7.71821	8.90069	7.96159	7.99589	8.32662	8.80824	8.24065	7.99394	8.29912	8.30787	8.12145	7.56909	7.53983	8.6525	7.54803	7.24291	8.35066	8.17187	7.44755	7.61328	8.04364	7.42758	8.71356	7.66234	9.597	6.97674	7.11986	8.14885	8.76389	8.30466	8.98852	9.43493	9.57618	8.10142	8.18236	7.61079	8.23062
CTD-3157E16.1	9.85413	8.66793	8.32836	8.97484	7.40062	9.12619	7.46297	8.2775	7.93595	8.51291	7.69833	7.0131	9.39068	9.54418	7.96014	9.92809	10.0452	7.9564	8.82375	8.30958	9.76322	9.07533	8.76915	9.83279	8.59863	9.01526	10.3574	10.7756	7.02484	9.72137	10.3206	9.28873	8.44232	9.26808	7.90274	7.14333	10.8363	8.83174	9.41499	10.0265	9.91166	9.75801	9.85442	8.67674	9.01544	8.63046	8.91918	8.72555	8.45705
PCAT6	10.0931	7.81228	11.5334	11.4359	9.58185	10.8497	11.3039	11.5846	9.55676	9.56176	10.1903	9.02576	10.6379	9.5323	8.46138	9.61147	9.70665	10.1866	9.09194	9.30624	9.1523	10.1236	9.43994	10.2568	10.4815	10.8757	9.31127	8.76001	9.46622	9.43026	10.2569	9.78671	10.5957	9.68942	8.91856	9.16742	11.0301	9.9257	9.11146	10.262	9.68194	11.0785	11.8205	10.4799	8.93896	10.4952	9.89503	10.0295	10.8225
CTD-2033A16.3	9.12266	6.65749	8.98826	8.19572	7.77648	8.1761	8.71963	7.56361	7.62568	7.54434	8.70336	7.0179	8.14929	8.79149	8.52086	8.50707	7.75424	7.27772	7.15346	7.56912	8.09816	8.81868	7.97721	9.67802	9.03593	8.74617	9.28639	8.8354	8.46696	8.88068	9.62579	9.79429	7.73374	8.88117	8.5212	8.36799	8.95477	8.33734	8.94421	8.70049	9.18286	9.25672	8.43705	7.40087	8.35302	8.3464	7.03728	8.62975	9.71307
RP11-613M10.6	8.80703	9.08684	9.03999	9.43769	8.71357	9.35348	8.59586	8.45825	9.10906	8.89468	10.0603	8.94965	10.1435	9.0195	9.01269	8.6927	9.39529	9.27516	10.0022	10.7149	9.89278	8.65974	9.14563	9.8723	10.0823	9.90125	9.41714	11.222	8.66594	9.99613	8.92361	9.05898	8.52822	9.85494	8.59042	8.67568	9.26979	8.04032	10.1165	9.64239	9.26846	9.03689	9.69691	8.61995	10.4334	10.1737	8.2697	10.2602	9.73156
AC006116.24	9.79824	7.87641	9.99139	7.42433	7.2172	9.20759	7.37875	8.1202	8.55869	9.1786	9.21855	7.27182	8.80953	9.49775	9.6213	7.94498	9.12508	7.50165	8.72435	9.40859	8.8447	8.47735	8.42539	8.76001	8.54807	8.32119	8.66966	7.76263	7.03773	9.31772	8.37382	7.96305	9.00788	7.63098	7.5273	6.84219	9.0338	9.67913	8.19964	8.67962	9.29373	9.63617	10.3822	9.86781	7.76696	10.7377	7.9245	8.26713	7.40062
RP11-44F14.8	7.48606	8.08518	10.2976	7.99344	8.88301	9.26599	7.51282	7.27165	7.82705	8.12372	8.2137	9.04124	8.6181	7.18504	8.53699	8.76392	8.67664	8.91869	7.35618	7.28052	9.27227	8.62679	7.60172	8.69235	7.49854	7.93515	7.26568	8.92013	9.36133	8.71816	8.94921	9.10655	8.51294	9.09138	7.45664	8.51301	7.75915	7.68053	9.1512	8.86516	9.51642	8.15397	8.72852	8.31938	8.16029	7.60351	9.24724	8.66335	7.9321
LINC01980	8.74406	10.7292	10.2452	9.26878	10.1854	10.1037	10.4413	6.65911	7.04333	10.4494	6.88505	6.69007	10.1876	9.10298	9.12847	10.3076	7.54347	9.68536	8.37685	9.62736	9.14276	10.813	10.7464	11.0177	9.60879	9.98569	8.13307	10.4113	8.90217	9.38688	10.2245	9.72265	8.8396	10.1921	7.8096	9.98106	7.74183	9.20693	9.38907	9.67868	10.3301	9.33715	9.75903	9.58236	11.0503	9.51142	9.95941	10.4164	9.4034
RP11-465B22.8	8.90871	9.30855	8.50622	9.1274	8.33717	10.2787	9.52075	10.4658	8.15581	7.24802	9.0235	9.60031	8.46011	9.02707	8.29273	8.79228	10.2911	9.76055	8.08159	7.7516	9.064	8.04984	7.67251	9.27333	10.3534	8.42744	8.27555	8.71544	9.5437	8.53603	9.18338	8.77903	9.50101	9.1359	9.60358	8.51813	8.11954	7.2506	9.30679	8.73239	9.41421	9.66488	8.76478	10.7924	7.70908	8.85287	8.96139	8.39596	8.30132
RP11-863P13.3	8.03739	9.1553	7.66028	9.74041	7.20173	8.46697	8.51201	7.09181	7.64245	9.95946	7.53379	6.9555	7.91149	9.47111	7.67823	7.69497	8.16084	7.08508	8.67389	8.19489	7.55466	9.59429	9.29014	8.56471	8.25262	7.93139	8.58471	7.41629	6.85002	11.6059	7.96405	8.85381	7.85215	9.13728	8.2022	6.70788	10.1289	7.06178	7.95412	7.8515	7.65606	8.52621	8.07223	9.30584	7.61148	7.81276	7.53971	9.96452	8.33206
LINC01137	10.4157	8.78516	10.0978	11.7965	9.49769	10.8946	11.8625	10.4973	9.8966	9.78795	10.7037	8.40694	10.8282	10.5391	9.75567	9.80951	9.98556	10.0076	10.7262	9.36181	9.58716	11.5082	10.4391	10.2525	10.0303	10.2824	10.226	9.44314	10.0132	9.60464	9.21892	10.0718	9.56597	10.9307	9.78224	11.0647	11.0189	10.5687	9.14164	9.37174	9.53379	10.3393	11.7453	8.91036	8.7554	8.27908	9.31272	9.79333	11.2764
AC012363.4	10.8068	6.91959	7.41893	8.88001	6.80372	8.5158	7.37875	6.77642	6.9972	7.12255	7.27299	7.15086	8.75047	8.7779	8.27786	7.8015	7.47433	6.74506	8.83708	7.32486	7.41595	8.43379	7.49318	7.62568	9.36746	7.7224	8.77655	9.70738	6.75525	9.15019	9.47273	9.56129	7.69056	7.31495	6.9266	7.88403	7.6844	8.18317	8.26079	7.35741	8.55768	8.79242	8.15058	8.78111	6.99868	8.14452	7.03728	7.38642	8.13208
DANCR	11.1357	11.5811	11.5272	11.1104	12.6768	11.5454	9.74587	13.19	12.2747	12.9284	13.2391	12.1243	12.3712	11.564	11.4082	11.2282	11.1191	11.8669	11.7586	11.8444	12.1051	11.796	12.1538	13.8722	11.4009	12.4578	11.3478	12.3739	12.1272	12.1331	12.4806	11.7705	11.5669	11.6484	11.0765	12.6008	12.6601	11.9075	10.7775	12.0917	11.782	12.4904	13.1568	12.1114	13.2155	12.1215	11.475	11.9948	13.1584
RMRP	10.6115	8.71745	8.03317	8.85747	11.3373	9.07153	9.82147	7.73575	9.0608	10.7425	7.46255	8.23489	8.61012	8.59153	7.7142	8.78234	8.22712	8.33855	9.05081	9.31705	9.04262	9.58614	9.11223	8.89559	9.02505	9.137	9.30331	9.49037	7.6365	7.96331	8.20072	8.236	7.77187	8.81081	8.3352	8.36665	11.7393	7.24816	7.81112	9.55428	7.51155	8.26059	9.59465	8.04333	7.85769	9.8352	8.74483	8.94146	8.85557
NOP14-AS1	10.4751	8.76068	10.1903	10.7786	10.0977	11.3712	11.273	10.5878	10.6001	10.6236	9.27108	9.14507	10.5849	9.30993	9.51791	8.60595	10.9055	9.46113	10.3668	10.069	9.11247	10.0531	9.09072	9.79706	9.52344	9.02936	10.7887	9.6646	10.3005	9.0037	9.2639	9.64817	8.68438	9.24193	9.62037	9.14466	11.2787	10.3457	8.76933	9.79753	9.06467	9.36626	10.7326	9.55048	9.60625	9.91347	9.34598	10.4302	10.0205
LOC105371049	8.39895	8.63793	7.85927	8.42697	7.64	8.44266	8.84226	8.1761	7.26499	8.07293	10.7836	10.3089	8.05644	8.69388	11.5241	8.42237	9.05256	10.1307	8.84598	7.61293	9.49807	8.85777	7.61213	8.65656	10.4258	7.69125	8.61065	7.7951	10.7494	7.71263	8.69786	8.72726	8.98196	8.62053	8.35717	10.6183	7.91817	8.64357	8.41765	8.36051	8.18982	9.49683	8.43286	9.1994	7.49818	8.38092	7.69867	8.10051	8.95445
RP11-304L19.1	8.39895	8.63793	7.85927	8.42697	7.64	8.44266	8.84226	8.1761	7.26499	8.07293	10.7836	10.3089	8.05644	8.69388	11.5241	8.42237	9.05256	10.1307	8.84598	7.61293	9.49807	8.85777	7.61213	8.65656	10.4258	7.69125	8.61065	7.7951	10.7494	7.71263	8.69786	8.72726	8.98196	8.62053	8.35717	10.6183	7.91817	8.64357	8.41765	8.36051	8.18982	9.49683	8.43286	9.1994	7.49818	8.38092	7.69867	8.10051	8.95445
SMAD5-AS1	8.25396	10.2387	8.43653	7.2537	7.76305	8.2532	9.25606	7.31697	7.66048	7.28901	7.36546	8.228	8.71183	7.51962	6.5662	7.95735	7.76318	7.142	7.7194	7.34988	9.10408	8.15643	8.45765	8.03567	9.01861	9.93956	7.29755	7.25482	7.12968	8.12642	8.6422	7.51726	7.31137	8.10589	7.37509	8.76197	7.95596	7.54727	8.00529	7.83718	8.23224	8.28639	8.66913	7.05566	7.20259	9.19105	8.23636	7.38642	8.58574
CTD-2139B15.2	12.2557	11.7859	12.2799	12.8699	11.5253	12.4191	12.5188	11.5093	11.2869	12.2904	11.2634	10.6266	10.7384	12.2577	11.4074	11.5147	12.1853	10.9282	11.6037	11.4011	12.2594	11.4395	12.3283	13.3392	12.116	12.4493	12.2795	12.4989	10.7594	13.1629	11.4294	12.8218	12.0025	12.5315	11.7919	10.4084	13.8647	11.3207	13.114	12.2398	12.3365	12.2933	12.164	11.5243	12.333	11.7456	11.3461	12.1248	12.4518
FEZF1-AS1	7.40347	8.74942	7.89386	7.67241	8.38255	8.28012	7.63335	6.72671	7.00332	8.55906	8.61954	9.45431	7.7671	7.84299	7.054	7.44066	7.49863	8.37915	7.9217	8.52207	10.3363	8.02931	7.51051	8.62823	9.58223	9.7347	7.19254	7.94255	7.84722	9.15472	8.53591	7.47545	6.85797	7.8782	10.2325	9.83303	7.68946	8.24455	10.4321	9.37484	9.75192	7.47439	7.84425	10.5435	7.2549	7.32333	8.98144	8.50767	7.24888
RP11-44F21.5	8.9241	10.9014	9.12775	9.01953	10.4862	9.16538	8.42505	9.46367	8.6903	10.0583	8.73078	9.44909	8.54446	8.02496	6.85873	10.0179	8.51852	8.91391	7.13476	8.78082	9.16826	11.326	8.34194	10.3784	8.87998	9.41985	7.151	8.89714	8.93807	8.38068	9.58661	9.34873	6.97156	9.22634	8.65326	7.86754	9.65972	8.89509	8.20704	9.78699	9.03619	9.05875	9.89641	9.3011	9.8944	8.49174	11.3967	9.46681	8.61408
RP11-98D18.3	7.64851	7.32968	8.98556	8.02909	8.07875	8.20554	7.48579	7.14433	7.68167	7.40448	6.84898	6.85539	7.91255	7.84517	7.24185	9.8445	9.33233	7.17325	6.94534	8.07266	7.93482	10.748	9.57011	7.86881	7.76244	8.06266	7.78815	8.22682	6.66878	7.94102	8.17247	8.75184	8.63064	9.61017	7.27473	7.65918	8.23837	8.73886	7.5885	8.12172	8.25294	8.10893	7.89123	6.75054	9.45385	7.82876	7.87956	9.53209	7.66197
DHRS4-AS1	10.8462	9.5578	10.4289	9.01699	9.77093	9.1581	8.23147	8.90334	9.2316	8.53826	10.268	7.90285	10.3141	10.3327	9.08019	9.89073	10.0518	9.31597	8.6901	10.5376	11.4529	10.303	10.1437	10.7442	11.7125	11.6656	9.60011	9.93097	9.89857	9.51466	11.2687	10.7927	10.4246	8.83419	9.40022	9.05293	10.3068	10.4896	10.9952	10.8217	10.6158	10.0374	9.91143	9.14451	9.25189	11.1775	10.9768	9.74354	10.4007
RP11-1049A21.2	7.40347	7.91241	8.49818	7.37367	7.00188	8.07039	7.37875	7.07052	9.84669	7.90521	7.05222	6.50784	8.68029	8.40791	6.72947	9.39947	9.28624	8.47284	7.74242	8.82036	9.71505	8.53953	7.79368	8.42023	8.98666	8.40387	8.61178	9.00733	6.65039	9.3215	7.74764	7.58036	7.46626	8.31982	7.13145	7.13063	8.88577	8.13048	7.92454	9.09685	8.58627	9.65548	9.06624	7.90702	9.40704	8.04436	8.63363	8.93469	7.7673
LOC100996732	8.79378	10.5158	11.6904	12.3197	10.1208	9.81876	11.0704	11.5826	10.6003	10.1335	9.38436	10.0003	10.4386	11.5531	10.0476	9.29491	10.8865	8.06106	10.5563	11.5499	10.233	9.55845	11.5974	10.4765	10.3764	11.4257	11.3901	10.6256	7.46201	11.2782	11.4594	9.48993	9.61337	9.13336	10.9495	10.5814	10.7471	9.66149	10.3125	9.71254	10.5835	11.0415	9.96022	10.9282	10.0351	11.1457	10.9517	10.0211	11.6024
RP11-14N7.2	8.79378	10.5158	11.6904	12.3197	10.1208	9.81876	11.0704	11.5826	10.6003	10.1335	9.38436	10.0003	10.4386	11.5531	10.0476	9.29491	10.8865	8.06106	10.5563	11.5499	10.233	9.55845	11.5974	10.4765	10.3764	11.4257	11.3901	10.6256	7.46201	11.2782	11.4594	9.48993	9.61337	9.13336	10.9495	10.5814	10.7471	9.66149	10.3125	9.71254	10.5835	11.0415	9.96022	10.9282	10.0351	11.1457	10.9517	10.0211	11.6024
CYTOR	10.7008	10.0158	10.3541	10.9418	9.02593	11.0305	11.9825	9.93327	11.1224	11.2329	8.6968	9.17757	10.2559	10.4177	9.37024	9.91851	10.3212	9.06539	10.3431	10.5275	9.88022	11.3474	11.5492	10.7985	10.2913	9.56718	11.2239	11.3686	8.0704	12.1013	9.39049	11.6415	9.35464	10.9275	10.766	8.77608	12.1758	9.25646	9.68562	11.1372	9.53876	10.0981	10.0528	9.41503	10.0818	9.43217	9.32372	11.909	10.1175
AP000695.6	9.58853	7.764	7.79992	9.1615	8.39347	9.05012	7.73525	7.67462	7.87632	9.09075	7.15319	6.63663	7.96918	8.27067	7.3607	8.62339	8.22688	7.06434	8.71483	8.29697	7.81306	9.77408	8.68875	7.60398	7.84824	7.96785	8.03938	7.40734	6.99525	9.42951	7.94112	9.15413	7.80676	8.43324	7.34625	7.30948	9.65881	8.30389	7.46215	8.37198	7.63303	8.10597	8.82047	7.47436	7.52378	8.86531	7.81323	8.34693	8.15168
RP11-783K16.13	10.4838	8.29849	10.2101	10.5391	10.043	10.4999	11.8994	11.0044	9.04149	10.3435	10.267	9.04283	11.051	9.44838	9.43721	8.72172	11.2237	9.33101	9.89263	9.62927	8.80363	9.49555	10.0543	9.10189	9.1393	9.3924	9.92961	8.51219	9.78275	9.17351	9.22881	9.96202	9.10999	10.6268	9.46192	10.3207	10.7101	9.49929	9.01931	10.2879	9.08348	10.2498	10.3521	9.1967	8.67953	10.4506	7.8649	8.68856	9.78019
LINC01269	7.73986	6.74373	9.40331	7.44508	8.42372	7.66532	8.45767	8.97626	7.65472	7.58784	8.97252	7.40741	9.31108	7.75077	7.9639	7.03912	9.79362	8.23113	7.46161	9.49647	8.92836	7.38437	7.49318	8.56101	9.32356	9.66069	7.41426	8.45217	10.2639	7.79675	7.99344	7.40931	7.88213	8.79341	9.71114	9.77126	7.94316	8.81941	8.23652	9.54989	7.78268	8.82095	9.24074	7.00918	7.14146	8.34383	7.81809	7.44683	8.06773
RP11-134G8.10	9.91236	9.5007	10.1678	10.7812	9.70472	11.4756	11.5874	10.3175	9.93122	10.1216	8.42905	10.5134	11.1144	9.47246	8.90797	10.4106	10.4585	9.3073	9.59943	10.1694	9.60707	11.0275	10.0908	9.93874	9.53274	9.72811	10.6031	9.71734	9.0498	10.7957	9.74241	10.0545	9.38406	10.5329	10.049	9.66386	10.5542	9.94746	9.69957	9.85796	9.70552	10.7221	10.5288	9.2422	10.226	9.48388	10.7339	10.6791	10.8068
CTD-2134A5.3	9.12505	7.67097	8.49197	9.08307	7.70832	8.4336	7.63582	7.47198	8.13829	7.21005	6.98266	6.72317	7.67823	8.58775	7.48673	8.45628	8.09394	7.52596	7.69991	8.15199	8.84675	8.44324	8.47314	8.96523	9.02838	8.81556	8.05835	7.52394	7.93096	8.33236	8.10984	9.31271	7.74516	8.24807	6.99148	7.03337	8.77349	8.1231	8.9632	8.18171	9.17007	8.7561	9.04424	7.09522	7.59017	9.30801	7.50793	8.55972	9.15604
ANKRD10-IT1	8.68883	8.91572	8.17788	9.37841	7.48628	8.71911	7.58159	8.86574	9.15376	8.47031	7.80436	6.99029	8.49201	9.78355	8.3474	10.9375	9.85034	8.70949	8.21586	8.44005	9.41194	8.75736	8.675	9.22171	9.35827	7.99889	9.59813	8.96972	8.01677	9.91297	9.51147	11.3665	9.50504	9.12411	8.12386	7.46222	9.03215	7.26673	9.42212	8.91446	9.33037	9.41347	8.72447	10.0573	9.04485	8.79057	9.16866	9.80781	8.30653
CTA-373H7.7	7.61304	8.05749	7.83821	8.37462	7.09581	7.95551	7.49864	7.35894	8.9332	7.48997	7.91899	6.65001	8.25039	9.00135	7.00582	8.10385	9.078	9.0063	7.65448	8.06592	9.98232	8.24583	7.7162	9.27814	9.68573	8.08159	7.82314	8.64072	6.85827	10.0332	10.8475	8.30455	9.01645	8.11342	8.2054	6.80575	8.38107	7.28964	8.33375	8.937	9.4048	9.93959	8.12482	9.15004	8.02339	8.25366	8.14032	9.07427	7.83845
RP11-336A10.4	8.03551	6.85936	8.2778	7.94884	7.64866	8.04132	7.37875	7.9214	11.0541	7.21732	7.15741	6.84779	9.20251	7.72349	7.64091	7.96321	8.40075	7.01304	7.20537	7.8518	7.5552	8.39487	7.54166	7.6349	7.57691	7.73828	8.41425	7.15313	7.02834	7.47042	7.42871	8.1417	8.0689	9.14015	9.21915	8.77405	8.59663	10.1982	7.17954	7.84283	7.73241	8.26069	8.85864	7.20913	7.19273	7.63283	7.15093	8.50177	7.8606
FAM83H-AS1	12.2949	10.1637	12.0863	10.6248	11.5256	10.8099	9.66484	10.9445	11.3527	10.2986	12.5177	10.6953	12.2768	11.3429	11.2266	9.96433	12.2553	11.86	11.3943	12.6652	11.3064	11.648	10.2839	12.1659	12.8608	12.1015	10.019	11.8923	12.0679	11.4272	12.3789	11.5655	11.2201	10.6835	11.9396	11.1872	11.5159	11.7305	12.6692	12.5611	12.2771	11.437	10.9233	11.5806	11.4125	10.3925	12.1825	11.3094	11.8857
RP11-479G22.8	8.36972	8.81068	7.98985	9.29182	7.50846	9.50004	8.17143	7.81437	9.11202	9.41657	7.59338	7.21229	9.10644	8.59102	9.8078	7.97193	9.14428	7.61637	8.89208	10.8096	8.46115	9.32754	8.77896	7.84941	8.31567	8.92062	10.8148	8.21718	7.18407	9.58519	8.36788	8.25811	8.12167	8.79052	7.79769	7.66128	9.19485	7.7549	8.25119	8.5852	7.82548	8.86279	8.7735	7.74977	8.6676	8.19258	7.86827	7.99075	9.47755
TPRG1-AS1	7.67182	8.73909	8.38827	8.63494	8.38706	8.19296	7.37875	7.30907	7.18204	8.7224	8.49176	6.71412	9.71638	7.60367	7.67514	7.98272	10.0532	7.4135	7.9094	9.74947	8.28445	8.80341	8.60648	10.2105	8.42126	8.2609	9.10915	8.41483	8.09532	8.65971	8.05093	8.53581	8.86334	7.69621	10.1922	9.18567	7.72459	8.59088	7.99302	8.81922	8.28091	8.36226	7.74646	7.71946	8.04679	8.5355	7.18373	8.44085	8.28303
AC007193.6	8.48591	7.23432	7.4347	8.63378	6.74063	7.75205	10.3534	9.91671	7.24142	7.14271	6.92821	6.60064	8.05237	9.55045	6.5662	7.36702	8.4183	6.91452	7.62305	7.29024	8.0959	8.95982	7.931	7.63216	8.58621	9.19254	7.95104	7.30427	6.86447	7.97825	8.28037	7.64631	9.13213	7.8398	7.10347	6.82045	9.08161	7.93156	10.0549	7.7985	8.49259	8.55902	9.39788	7.45609	7.2336	7.35601	7.36446	10.087	8.25194
CTD-2555C10.3	9.11819	6.82695	8.92285	9.17086	9.01478	8.50029	8.54612	9.1668	8.07981	7.61436	8.74709	7.32065	9.2657	7.95784	7.44651	7.13054	8.68145	8.30135	7.78523	9.63697	7.65796	7.73748	8.32502	7.64368	8.83693	7.81019	8.43177	7.26143	7.78368	7.79932	7.62786	7.78823	7.35255	7.80118	9.83309	7.78911	9.5519	8.33462	9.1489	8.85944	7.73683	8.37845	8.04039	7.9093	7.34406	8.21392	7.21531	7.90897	10.2534
LOC105370681	9.11819	6.82695	8.92285	9.17086	9.01478	8.50029	8.54612	9.1668	8.07981	7.61436	8.74709	7.32065	9.2657	7.95784	7.44651	7.13054	8.68145	8.30135	7.78523	9.63697	7.65796	7.73748	8.32502	7.64368	8.83693	7.81019	8.43177	7.26143	7.78368	7.79932	7.62786	7.78823	7.35255	7.80118	9.83309	7.78911	9.5519	8.33462	9.1489	8.85944	7.73683	8.37845	8.04039	7.9093	7.34406	8.21392	7.21531	7.90897	10.2534
RP1-257A7.5	8.17228	8.46036	8.62313	9.05554	7.90265	9.68123	10.0055	7.91307	10.0808	8.43281	7.61692	8.08214	8.18015	9.29932	7.26038	9.44322	8.95858	8.19663	8.0853	8.29517	8.77454	8.46841	8.44554	9.63391	9.01974	8.7511	9.89861	8.36549	7.31342	9.55628	8.97533	8.02136	9.00084	8.74552	9.04997	7.75787	9.33644	8.49081	8.01948	9.33096	8.68069	9.40755	9.07826	8.77822	8.55698	8.64782	8.7881	9.45882	8.22549
RP11-20I20.4	8.32433	8.73907	7.75051	9.65894	7.61687	10.5777	9.67131	8.9506	8.61221	8.26976	8.22658	8.39063	8.98108	9.24825	7.11476	8.55548	9.23123	8.24382	9.59008	8.15579	8.12882	8.81986	8.85154	8.56228	8.5071	7.7773	9.0298	7.64059	7.48824	9.65278	9.4228	8.80748	8.26986	8.11925	7.98396	6.94501	9.85988	7.72611	9.03998	8.30748	9.68473	8.65917	8.44266	8.93631	7.7208	8.68858	7.93332	8.57394	8.54282
UCA1	9.50876	6.8735	7.9759	10.0989	6.9536	7.975	8.03932	10.05	8.41714	7.6028	8.3626	6.81529	8.14369	8.50587	6.86112	7.38358	8.54395	7.29686	7.54802	7.99833	8.40764	7.38592	7.64847	7.46994	7.96208	10.0457	11.4538	7.2359	7.32966	9.18942	9.2947	7.48508	8.68583	8.11327	8.86841	7.06151	8.13401	7.91056	7.74386	9.19697	7.98958	9.29793	9.4304	8.03155	7.11201	7.41833	7.30392	7.4447	7.43249
RP11-1038A11.3	7.45914	10.0434	8.74644	8.47521	7.76524	8.48647	7.37875	7.29843	7.6047	9.17058	7.52144	6.5805	8.83152	7.84635	7.62046	9.18613	8.72705	7.86328	7.24446	7.3898	8.98416	9.56999	8.65158	8.6143	8.78107	8.80161	7.43255	7.70527	7.3702	8.19125	8.66074	9.28596	6.85797	8.95017	7.65033	6.97679	8.74067	8.65053	8.61659	8.51797	9.46693	8.88687	8.00984	9.30233	8.30529	9.1771	9.82579	9.0032	8.35722
TRPM2-AS	8.91926	8.48935	9.18141	8.05845	8.62903	7.69414	7.37875	6.74204	7.11424	7.88909	6.87118	7.12446	8.68441	8.52413	8.07729	8.41795	7.57776	7.7701	7.00389	7.92901	7.26772	7.57091	7.54372	8.65441	8.39884	9.89219	8.00875	9.14177	8.24173	8.70362	8.6459	9.11647	9.11351	7.67489	7.58349	8.38479	7.69421	7.96561	8.34908	8.75872	8.88033	8.32681	7.86603	8.92163	8.0721	9.01931	7.22604	8.12502	8.43582
AC093673.5	9.15429	10.0101	10.0604	10.5273	9.49503	10.622	10.1808	10.5176	10.4083	11.0196	10.3873	9.66136	9.43533	10.56	9.567	9.68554	10.7919	9.50793	9.78003	9.88083	11.0578	12.3555	10.7354	11.0187	9.83084	10.8072	11.5167	9.73898	9.08213	10.8756	10.3543	10.3044	9.86692	10.5458	10.1057	9.99883	11.0535	9.62841	9.48212	11.4052	9.18594	10.6264	11.559	8.92577	10.0125	10.6176	9.50566	10.1356	11.5983
MIR193BHG	10.2209	6.96973	8.40585	9.81204	8.12768	8.88219	10.3946	9.31689	8.29688	8.0663	8.81498	6.67434	8.58655	8.78312	8.14841	7.8075	9.8446	7.15786	8.95314	8.09545	7.66455	8.00893	8.86328	8.62751	8.03719	8.26492	8.10554	7.69865	8.69135	8.3417	7.33052	8.16876	8.76482	8.26958	8.33574	8.68983	8.9811	7.86356	7.3844	7.92893	7.42337	7.69384	7.99959	7.86202	7.34681	8.55339	7.52551	8.60082	8.5982
RP4-545C24.1	8.69945	8.79932	9.30984	8.60999	9.58618	8.82639	9.94077	9.04065	8.37007	9.79097	9.60896	9.97797	8.62285	9.02134	9.25622	9.05033	9.31765	8.85462	8.07081	9.3674	11.9898	9.92605	10.5527	11.8354	10.2205	10.1436	8.80626	12.1718	8.60371	9.93923	10.2271	10.1912	9.33171	9.54769	10.4206	10.1698	9.0899	9.92454	10.2779	10.2784	9.18128	9.9617	9.17636	9.94841	8.2335	9.94463	9.24427	8.39824	9.49434
ZBED5-AS1	10.0594	10.0662	9.81188	9.48813	9.0287	10.207	9.96719	10.9196	10.3409	9.36965	9.21933	8.79767	9.61178	9.84753	8.64337	9.2422	10.7872	8.9936	9.31712	8.85752	9.84695	10.5623	9.78896	10.6108	9.94764	10.3502	9.42733	9.77022	9.0689	9.65908	9.15965	11.6194	9.18575	9.82552	9.34167	8.7852	11.6823	11.2213	10.1243	10.748	10.8805	10.262	10.6394	8.9667	10.5666	9.6759	9.27995	10.2467	10.2192
RP11-863P13.1	7.8152	8.80273	7.52627	9.53976	7.12744	8.31895	8.51586	7.06135	7.41894	9.55118	7.29107	6.73639	7.81309	9.20332	7.45446	7.50598	8.27176	7.1017	8.37021	8.0528	7.50505	9.48248	9.1108	8.34498	8.17197	7.81843	8.57332	7.36019	6.79837	11.3367	7.82832	8.67065	7.84986	9.10395	8.2723	6.79236	9.79944	6.96755	7.90131	7.776	7.60749	8.34595	8.0582	9.22152	7.55092	7.80943	7.53008	9.75274	8.25448
ABHD11-AS1	7.82934	6.85753	7.98214	7.2972	8.48248	8.37596	7.39551	8.63913	7.33626	8.50556	7.1495	7.08945	8.48895	7.7656	8.06019	7.76724	8.57713	8.61829	6.94534	7.67544	8.65387	8.80007	7.65288	9.77088	9.46946	10.2738	7.32151	8.04574	8.60977	7.67618	7.82945	8.16354	7.34404	8.06861	8.46648	6.731	8.71711	9.2398	7.73994	8.27511	7.78605	8.29461	8.44183	7.15601	7.49433	7.91531	8.54536	8.31327	8.27881
RP11-11N9.4	7.72742	7.00756	9.0947	7.47936	9.97739	7.88966	7.51325	6.92446	7.88976	7.24413	9.99768	10.4275	8.80726	9.29096	6.71221	7.53447	7.93145	9.64368	8.50159	10.6708	10.0082	7.85708	7.93182	7.51944	7.90813	8.03057	9.47304	7.59165	9.84737	7.90436	9.11929	7.3533	7.03779	7.95053	10.563	8.88712	8.42631	9.28409	7.89313	7.63989	11.8845	7.70527	7.90258	6.90485	8.60895	10.4139	7.5396	7.76214	9.80038
CTD-2008L17.1	7.90944	9.95052	8.80846	7.66752	8.61864	8.08604	8.15567	7.47129	7.56372	8.35983	8.42754	7.47913	8.84048	7.69739	7.25352	8.6208	9.08003	7.79852	8.07861	8.15008	8.55957	8.58569	8.76433	9.30991	8.14451	9.32545	7.62296	8.65103	8.00267	7.67879	8.91138	9.12597	6.95688	9.18021	8.33633	6.5961	8.12745	8.41609	8.24251	9.16887	8.78884	8.84514	8.76783	9.5037	8.33004	8.88744	8.24285	8.20611	7.96843
MIR100HG	7.92208	8.22274	7.80872	8.57165	7.13562	8.19493	7.62399	7.12998	9.51685	10.0333	7.59382	6.62891	9.22171	8.21209	7.13539	9.10584	8.78149	7.46585	8.43955	8.23851	8.83983	8.7914	9.04287	8.16979	8.00584	7.94575	8.63062	7.48423	6.86973	10.6029	8.3757	8.44963	7.84088	8.35346	7.69027	6.86781	10.2403	7.35117	8.04812	8.54545	7.81297	8.12978	8.77154	7.78597	8.66964	7.91528	8.0881	8.99983	7.57327
AC090587.5	9.34367	8.22535	9.55445	8.46264	8.65803	8.38456	8.27015	8.68136	9.16833	9.71797	8.87252	6.62472	9.86975	9.51021	8.48382	8.0134	10.1782	9.13179	9.1472	8.80335	10.9512	9.81285	9.60043	10.3284	10.1747	10.4437	9.93515	9.59486	8.62864	9.07291	9.27536	9.15208	9.12522	8.85512	8.7522	8.75266	9.5081	8.12047	9.94677	10.7657	9.78643	9.21556	9.99969	9.73947	8.88133	10.4434	9.1675	8.70217	9.33139
LOC105376527	9.34367	8.22535	9.55445	8.46264	8.65803	8.38456	8.27015	8.68136	9.16833	9.71797	8.87252	6.62472	9.86975	9.51021	8.48382	8.0134	10.1782	9.13179	9.1472	8.80335	10.9512	9.81285	9.60043	10.3284	10.1747	10.4437	9.93515	9.59486	8.62864	9.07291	9.27536	9.15208	9.12522	8.85512	8.7522	8.75266	9.5081	8.12047	9.94677	10.7657	9.78643	9.21556	9.99969	9.73947	8.88133	10.4434	9.1675	8.70217	9.33139
RP11-54O7.17	7.92056	7.99258	8.49171	9.56824	7.04303	7.88101	8.31453	8.23576	7.31009	7.37677	8.94645	8.59475	8.8237	9.62397	8.57982	7.82455	7.89176	9.43203	8.67369	7.53628	8.4422	8.2455	7.74493	8.3897	8.06385	7.7596	9.16614	8.06133	8.3621	8.20758	9.21197	7.76265	9.13208	10.0225	8.02071	7.5927	8.36718	7.26542	7.4512	7.70244	8.50366	8.43912	8.65168	9.29819	9.95408	8.42987	7.43958	9.37244	8.11274
KB-1562D12.1	8.44123	7.20391	8.11425	7.62655	7.53078	8.37759	9.89857	9.37896	9.75447	7.47828	7.48358	7.25377	10.1068	7.36796	6.66906	8.31522	8.37236	8.12171	8.1254	7.50573	8.0905	8.06428	8.25256	8.45478	8.47363	8.05945	7.15599	9.06032	9.50736	7.6692	7.90338	9.42729	8.44354	8.76894	7.99309	7.43318	8.21443	9.06252	7.82385	8.21437	8.13025	8.06372	10.7957	6.79231	9.38755	8.14879	10.1651	8.77366	7.23061
LOC101929574	7.47979	8.12738	7.58317	8.82857	8.17521	8.23913	7.48846	6.98062	8.34094	7.12255	7.39958	6.62188	8.35764	7.21022	6.80445	8.66382	8.54321	7.64687	7.57611	8.63374	7.42119	7.51325	8.8773	8.96658	7.76462	7.58133	8.07652	9.00447	7.0366	7.52824	8.54476	8.16636	8.18368	8.51006	7.76216	7.57021	8.3465	7.62126	8.08302	8.52343	8.79548	8.71348	7.71703	8.29186	8.71548	8.91201	7.45725	8.09854	7.59983
RP11-137H2.4	7.47979	8.12738	7.58317	8.82857	8.17521	8.23913	7.48846	6.98062	8.34094	7.12255	7.39958	6.62188	8.35764	7.21022	6.80445	8.66382	8.54321	7.64687	7.57611	8.63374	7.42119	7.51325	8.8773	8.96658	7.76462	7.58133	8.07652	9.00447	7.0366	7.52824	8.54476	8.16636	8.18368	8.51006	7.76216	7.57021	8.3465	7.62126	8.08302	8.52343	8.79548	8.71348	7.71703	8.29186	8.71548	8.91201	7.45725	8.09854	7.59983
PRR34-AS1	9.65154	8.85261	9.4627	9.6305	9.01042	9.61108	11.2558	9.56334	9.26207	9.68468	9.67576	10.4177	10.069	8.88881	9.35298	9.34741	9.07387	8.36594	8.99075	9.1059	8.94662	9.83549	10.0452	10.1411	9.30808	10.0133	10.1594	8.79952	8.58279	9.23449	9.12809	8.92714	8.9909	9.43185	10.2351	8.63569	11.0464	8.56247	8.76746	10.8141	8.82181	9.47099	10.2014	8.27405	9.19818	8.94695	8.01834	9.61464	10.3943
RP11-95M15.1	7.60376	8.8238	9.1414	7.63301	8.78877	8.2972	8.60904	7.81533	7.23568	7.34206	7.63892	7.59867	8.80794	7.28063	7.75854	7.30054	7.49528	8.9122	7.8387	7.55976	7.40562	7.35122	7.58057	8.23667	9.05963	10.0778	7.10317	7.1857	8.15131	7.97632	7.48189	7.88462	6.85797	10.0641	7.33276	8.86404	7.78348	7.85741	7.29826	8.38139	8.11284	9.03327	12.0046	6.88547	7.44014	9.87252	7.49862	7.78748	9.01099
LOXL1-AS1	8.96041	9.82438	8.60759	8.80381	8.28952	8.0806	8.00063	8.3182	8.444	8.04507	7.26606	8.06305	8.16709	8.98312	7.07644	9.11167	8.36374	8.05649	8.25783	8.71306	9.09381	8.96378	8.03267	9.6869	9.19526	9.42455	7.93175	8.11179	7.54239	9.13967	9.77206	9.249	8.53553	8.59661	8.11892	8.04479	9.1371	9.22403	9.4336	9.59676	9.15104	9.04929	9.02104	8.33959	9.59958	8.96287	8.80091	9.17203	9.50758
RP11-286B14.2	7.71037	7.58084	8.07141	7.42867	6.76718	7.68294	7.37875	7.12556	7.12595	7.6407	7.12972	6.50784	8.32562	7.33515	7.01689	8.20043	7.71301	6.96859	6.94534	7.26794	7.38087	10.322	7.49318	8.69274	8.61806	7.6679	7.2154	8.00667	6.58154	8.04619	7.98265	8.90558	6.85797	7.31495	6.97724	6.60595	8.18431	7.09962	7.10718	8.03937	9.31803	8.9679	8.19374	6.87274	6.99868	7.53231	7.69347	7.45533	7.79359
SNHG15	11.1807	10.1596	10.4012	10.4492	10.3113	11.2868	10.7196	9.77635	10.132	10.3169	10.5929	11.2488	10.4538	10.3731	9.69083	10.0891	10.5157	9.97246	10.2494	8.79677	8.94447	10.2398	9.97057	9.8983	10.4268	9.31443	9.69533	11.1123	9.86794	10.1067	11.2052	11.2058	9.40568	11.304	10.9985	11.1259	10.9472	8.23811	10.2406	9.64887	9.70331	9.88752	10.1113	10.6931	10.0443	9.7326	10.2712	11.5416	10.4297
RP11-440D17.3	10.3818	10.2946	9.71833	10.0497	9.95435	9.98833	7.976	8.88449	9.45888	7.87228	9.99282	8.40971	9.13466	9.42439	9.34186	10.4881	10.1561	9.4365	8.72372	9.47946	10.8691	10.9995	9.10592	8.8883	10.7895	9.83875	9.58882	7.70403	11.5751	10.1917	10.4025	9.95631	9.98223	9.32745	9.46972	9.1072	10.0277	9.66188	8.60291	9.55066	10.6594	9.92104	8.41508	10.1628	9.41936	9.29259	10.846	10.3192	10.1893
RP3-508I15.21	9.18045	10.59	8.04093	8.5442	8.75978	9.22507	11.1746	8.79595	9.08915	8.30437	8.12604	9.02197	8.38724	9.7371	7.76774	9.14251	9.25233	9.05032	8.11016	8.42406	9.45827	8.1741	8.59579	8.81075	9.58026	8.54093	8.3112	8.33202	8.91224	8.85553	9.31285	8.93949	9.51178	10.2276	10.0612	9.155	8.50363	7.52435	8.82451	8.20116	9.52838	8.86099	8.51149	9.01261	8.04736	8.33684	8.22553	9.78349	8.50223
MIAT	7.69416	8.20622	7.75059	8.53008	7.16337	8.15403	7.8052	7.54196	8.99786	7.60707	8.07059	6.74958	8.29877	9.01407	6.89723	8.19024	8.98618	8.85582	7.65727	8.05518	9.824	8.19602	7.78485	9.30644	9.6485	8.09964	7.98551	8.77335	6.87246	10.1647	10.8911	8.32408	9.13743	8.16315	8.64919	6.91457	8.35266	7.18083	8.39386	8.92466	9.40776	10.1447	8.12192	9.25878	8.1169	8.25025	8.16743	9.10966	7.79327
AC011288.2	8.56943	8.4909	7.46475	8.05106	6.83803	9.15767	7.51535	6.93296	7.69398	9.30726	7.33618	6.68972	8.53113	8.08567	6.58734	9.57665	8.83958	7.06895	7.97529	7.79358	8.21688	8.75137	7.68786	8.96836	10.5776	8.38576	8.22727	9.30255	7.84117	7.95653	8.6348	8.74452	6.90453	8.01511	6.91244	7.23891	9.32409	8.37941	9.1837	8.71277	8.59646	8.78478	8.52268	8.57988	8.15126	7.85294	8.97385	8.1732	7.67976
LINC00941	8.68868	7.00963	8.39402	8.78147	8.23941	7.96685	7.56623	8.46043	8.62438	9.86916	7.13752	6.71388	8.24635	8.5913	8.92366	7.21615	7.967	7.26525	8.34572	10.5169	7.87486	8.81656	8.63226	8.5149	7.77303	9.45764	9.44313	7.19758	8.25503	8.14809	7.74986	8.89457	8.23547	8.96012	8.17022	7.91212	9.4251	8.30259	8.14425	8.39023	8.17936	7.74539	7.79486	7.44674	7.27802	8.019	7.13372	8.32779	8.52443
RP11-123O10.4	8.5621	7.91417	8.1147	7.8541	6.88939	8.73672	7.37875	7.93956	7.81379	7.4921	7.63833	6.50784	8.72276	8.34713	6.5662	8.24613	8.92028	7.00233	8.41828	9.18919	7.69694	9.5192	7.92324	8.59977	9.11692	8.37874	8.53303	7.13203	6.66596	8.74336	8.20082	8.15787	6.85797	9.33093	7.03813	6.7596	8.78355	8.42093	8.20494	8.4186	8.50325	8.91268	8.6111	7.94075	8.17026	8.51121	9.16604	8.09194	8.23015
SNHG12	9.30532	9.46174	8.5435	9.98069	9.41741	9.8291	9.20173	9.23141	9.86131	9.05477	9.37825	10.4341	8.87887	10.4547	7.91561	9.98852	9.81428	9.9173	8.82117	9.14492	9.13617	9.1014	8.56315	9.60806	9.20608	7.9112	9.77106	9.55919	9.18506	9.18245	9.48692	9.56344	9.92672	10.8672	9.70637	10.4724	8.32029	7.39103	8.59388	8.51955	8.70365	9.39984	8.35551	9.69582	9.59507	8.92597	10.2778	10.2438	9.26019
RP11-20G13.1	9.66522	7.04179	8.27097	8.4405	7.69146	8.43391	7.59092	7.18723	7.11782	7.49688	7.15247	6.50784	8.91472	7.91882	6.81813	7.43583	7.86441	7.72105	8.22207	7.83839	9.3053	7.7424	7.8733	8.19923	9.71912	8.58406	7.29942	7.21066	8.3132	7.94441	8.97467	7.55299	8.35144	8.07865	8.35277	9.11214	9.29094	8.3509	7.65354	8.46449	9.27303	9.14901	7.90373	7.65178	7.06693	9.11561	7.4347	7.38642	8.26546
LINC00865	7.65688	9.36461	7.64742	8.17144	7.15358	7.8633	7.42041	8.33376	7.71481	7.47947	7.11142	6.64896	8.17231	8.07872	6.66201	8.31736	8.24955	7.34071	7.25545	7.84707	8.75105	8.75726	7.72687	9.22613	8.31612	8.75888	7.77421	8.52934	7.21306	8.24819	9.00481	8.95226	7.22002	7.96138	7.53843	6.8985	8.08895	8.16895	8.29046	10.0591	9.13998	9.00483	8.24312	7.68538	7.9202	8.09235	9.0914	7.85011	7.48236
RP11-257P3.3	11.4737	10.986	11.136	11.7141	10.5332	11.4941	11.6373	10.1795	10.3531	11.0581	10.1773	10.1544	9.88626	11.5505	10.7452	11.0043	11.0782	9.79759	10.6678	10.5488	11.4732	10.5824	11.4583	12.2248	11.1996	11.4425	11.2622	11.3594	9.71583	12.0887	10.2785	11.6238	10.9465	11.5757	10.6324	9.23483	12.6879	10.3527	12.2038	11.2853	11.3523	11.3156	11.2506	10.4548	11.3625	10.6559	10.2368	11.086	11.5192
SNHG9	9.48144	8.60062	9.57096	9.22261	8.03472	9.35192	10.2332	9.6219	9.69604	10.9726	9.63969	10.24	10.3333	9.32555	7.84094	9.76246	9.44624	9.92273	8.13777	8.33767	10.0159	8.67225	8.65974	10.145	9.92402	10.3427	9.31853	9.71472	9.52705	9.15584	9.49559	9.50302	10.1845	9.35606	8.85655	8.53167	9.7312	8.4857	8.92883	9.07819	9.30299	10.5984	10.4983	9.90617	10.1622	10.2334	9.03083	9.81109	9.55437
CTA-29F11.1	10.0743	10.524	11.0767	10.1922	10.057	9.38402	11.0249	10.4481	10.6723	11.3822	10.0849	10.5536	9.0525	10.576	8.44407	9.63449	9.12546	8.70371	9.44195	8.92215	9.355	10.1703	9.91617	9.96463	10.3404	10.3975	9.84017	9.50577	9.05736	9.56286	9.81514	10.5458	9.89791	10.302	10.1952	9.91086	11.4771	9.57283	9.40159	10.9756	9.60644	10.1959	10.1926	9.08969	10.0636	9.56728	9.75373	9.87988	10.6046
AC010761.9	7.97653	8.38812	8.48125	9.38663	7.83564	8.88442	7.37875	9.17403	7.53849	7.9573	8.26186	6.50784	8.40999	9.28759	7.74212	8.7032	9.58142	9.47015	7.66307	8.32153	8.8425	7.50548	7.91564	8.37082	9.23423	8.04439	9.0875	9.09163	8.74004	8.70696	9.24218	9.56234	7.50755	8.41426	7.66336	7.56515	7.93704	7.52379	8.39389	8.09389	8.82801	9.11098	8.25587	8.26364	8.19444	9.42603	9.7459	8.5104	8.12593
SOX2-OT	7.42958	8.74183	7.89267	7.29529	7.05359	7.67074	7.45288	6.94308	7.18228	7.77515	7.71055	6.68271	7.69376	7.20406	6.78396	7.68717	7.60137	6.92653	7.10735	7.34149	8.06553	8.36725	7.57003	8.89596	8.14544	8.50822	7.11622	9.83132	6.95379	8.93536	12.0489	8.1138	8.26371	8.194	8.76094	6.70597	7.75731	6.97627	9.73056	8.75993	10.3297	8.35924	7.77335	8.1971	7.40618	8.41396	7.13973	7.49498	7.345
RP11-521B24.5	9.24647	9.17648	8.16104	9.24444	7.95314	8.82203	8.0786	9.04594	8.3313	8.73107	8.56283	7.5537	8.98765	10.5189	8.31759	8.35567	9.92133	9.51336	8.0937	8.58167	9.5012	8.24831	8.01045	9.06534	9.65274	8.51564	8.46511	8.69211	8.72619	8.76463	8.88355	9.9109	9.57486	9.09554	8.39669	8.33139	8.55298	7.72155	10.0071	8.74172	9.71282	10.134	8.95634	9.75145	8.02274	9.11052	9.27722	9.90122	8.92041
RP11-1398P2.1	7.95258	7.18964	8.16766	8.68247	7.20177	9.92941	9.75212	8.32576	8.21466	8.43571	7.57515	7.13757	8.25527	7.62171	7.11185	8.08521	8.19596	7.34105	8.07599	7.98741	8.12657	8.68155	8.77494	8.111	8.59333	8.20069	8.45182	8.26167	7.22997	8.75968	7.85965	7.67044	7.40913	8.65398	7.73276	6.80957	8.9725	7.12687	7.98963	8.15967	7.60291	8.80931	9.33046	7.33651	7.50825	8.28286	8.64761	8.09664	7.50518
RP11-311F12.2	7.40347	6.74402	8.54517	7.2537	7.32634	8.20173	7.37875	8.36006	6.9972	8.16174	8.34887	6.64223	8.26234	7.36392	6.65423	7.16342	7.53815	6.95994	7.2605	7.48986	8.66592	7.35122	7.49318	10.4156	9.57948	7.83429	7.10317	10.7967	7.66146	9.43019	9.36087	8.59766	7.80542	7.31495	7.07894	7.10277	7.85755	7.74378	9.52222	7.72138	7.52226	7.80866	7.852	6.7744	7.10489	7.93889	7.03728	7.38642	8.18556
RP11-73M18.10	10.5692	9.79754	10.6033	10.6232	8.89218	10.3138	9.24912	10.0479	10.3799	9.46367	9.80282	8.66981	11.6434	10.6924	10.0187	9.15923	11.6184	9.59928	11.0209	11.2848	10.8707	10.5348	11.2289	10.5773	10.6412	11.2354	11.3137	9.84963	9.6313	11.1132	10.0445	10.3938	9.68504	9.89915	9.60117	9.71879	10.5463	9.86748	11.054	11.1739	10.1641	11.0386	11.8953	9.67152	8.53297	10.5745	9.09826	10.0913	10.4769
AP001372.2	8.93948	9.0038	9.60441	8.9473	8.30292	9.63626	7.89637	9.30699	8.34194	9.02425	8.07305	7.77012	9.11769	8.51812	7.28344	8.2814	9.51369	8.1866	8.61029	8.27129	8.66927	9.40536	8.98794	10.115	10.085	9.35569	8.39258	9.88305	8.22498	9.00186	9.46785	8.76557	9.32908	8.34822	8.16218	8.18953	9.06182	8.36097	10.2889	10.789	9.95038	9.45625	9.47996	9.14367	8.71669	8.54489	9.48794	8.31786	9.23868
RP11-1246C19.1	8.56802	8.77033	7.62639	9.13522	7.07264	8.3049	7.56509	7.76086	7.40464	8.29909	7.28006	6.73693	8.26218	8.18748	7.19936	7.65238	8.43714	7.57826	7.71065	7.59238	8.39825	8.28143	8.09371	8.76073	9.39119	8.56744	8.30638	8.23081	7.09301	8.21025	8.3336	8.47568	7.62356	8.15549	7.1529	7.33428	8.10892	7.16226	8.91854	7.79055	8.51731	8.44524	9.06535	7.52392	8.26419	8.06606	7.76377	9.1699	8.53835
CTC-499J9.1	8.55843	9.17771	8.7041	8.18134	8.8263	8.31882	9.1035	7.42091	6.9972	8.17895	8.77617	7.60785	7.90181	8.12003	7.69138	9.76075	7.47433	7.82526	7.06905	8.56386	8.424	9.44734	7.57425	8.99429	8.7759	9.13307	8.28533	8.92539	6.99011	8.81045	8.38254	9.03533	8.23758	7.31495	8.52847	8.41924	7.90065	7.5035	8.65625	8.61698	9.58415	9.61637	9.01121	8.73914	7.8269	9.06528	8.61595	7.66782	8.39622
RP11-703I16.1	10.5363	8.76187	9.25895	8.80345	10.5059	9.37396	10.2835	8.13547	7.80519	10.7473	9.04887	10.511	10.2789	8.25379	7.61986	9.24402	9.06146	8.19848	8.70305	8.42987	9.12505	9.17983	9.94247	8.90282	9.54079	8.65759	9.46838	8.13854	9.63196	8.50884	8.96283	8.5778	11.3702	9.04745	8.90425	10.1767	9.31996	9.5372	8.67429	8.91141	8.40925	9.6782	10.4564	9.33819	9.2294	11.4105	7.95554	8.643	10.2905
RP11-159F24.6	8.86809	10.081	9.61487	9.80527	9.72049	8.46421	8.31591	7.15603	8.97508	9.45805	8.64913	6.98179	9.51822	9.18392	7.29891	9.11472	10.4677	8.31385	8.65963	9.12293	9.66309	10.1276	9.4624	9.8638	9.604	9.19935	9.95381	10.2231	9.56448	9.27537	10.1152	10.4346	9.44142	9.77388	8.87544	8.88706	9.27273	8.23406	9.77433	9.43877	9.40754	9.46258	11.0892	9.20996	8.10426	8.94847	7.45595	8.80804	9.20756
CTD-3094K11.1	7.40347	10.1921	8.48234	7.69004	8.52291	8.13567	9.39656	7.25542	7.35833	8.1552	7.45152	6.94432	9.09342	7.47482	7.05713	8.537	8.10887	8.31387	7.91354	8.02454	8.95128	8.53613	7.89822	8.94848	8.54647	9.35285	7.32181	7.51988	8.58635	7.48463	9.2216	7.53583	9.01281	7.48472	8.95862	7.85205	9.19994	9.12352	7.31186	9.32006	9.20552	8.93741	9.32505	8.17328	8.27749	8.15547	8.73618	8.71903	8.50247
LOC100506100	10.4495	9.6228	10.121	11.081	10.3987	10.1041	10.9759	9.827	9.74538	10.0275	11.3873	9.25672	9.30156	9.4891	9.2187	9.08787	9.45921	9.57331	10.3202	9.05363	9.39548	9.4337	10.7196	10.1303	9.48058	10.4225	8.98004	10.3275	9.40795	9.53675	8.85238	10.4329	9.13694	10.4317	10.4395	10.2709	9.49251	8.87984	9.17086	9.66382	9.49591	9.52023	9.94472	9.03589	10.2506	10.401	9.073	9.53145	11.1733
RP11-545E17.3	10.4495	9.6228	10.121	11.081	10.3987	10.1041	10.9759	9.827	9.74538	10.0275	11.3873	9.25672	9.30156	9.4891	9.2187	9.08787	9.45921	9.57331	10.3202	9.05363	9.39548	9.4337	10.7196	10.1303	9.48058	10.4225	8.98004	10.3275	9.40795	9.53675	8.85238	10.4329	9.13694	10.4317	10.4395	10.2709	9.49251	8.87984	9.17086	9.66382	9.49591	9.52023	9.94472	9.03589	10.2506	10.401	9.073	9.53145	11.1733
RP11-73M18.7	10.5115	9.73709	10.5002	10.5632	8.81083	10.263	9.21345	9.93926	10.306	9.38248	9.76339	8.5675	11.4665	10.5815	9.97717	9.07228	11.5019	9.52034	10.9323	11.197	10.7745	10.4237	11.1501	10.4898	10.549	11.147	11.2354	9.76829	9.58568	10.9712	9.96926	10.3167	9.67928	9.79455	9.58196	9.70745	10.4409	9.77737	10.9502	11.0832	10.117	10.9759	11.7906	9.61705	8.52321	10.4745	9.06621	10.0616	10.4255
MAFG-AS1	8.66104	9.06853	10.3989	8.86259	8.63938	8.86275	8.56103	8.2252	8.97076	10.3102	8.43326	9.56333	8.89079	7.90127	7.93281	9.18961	8.78525	8.00718	8.75432	8.76517	9.00973	9.73901	8.7458	10.089	10.2889	10.6433	8.71712	11.0074	10.0805	9.03764	9.9166	9.55034	9.61016	8.05614	8.31398	9.9027	9.42922	8.82215	9.855	10.2742	9.07982	9.21808	9.21779	10.6963	10.2313	10.0354	9.33186	9.69413	10.135
RP5-884M6.1	7.52658	6.76948	8.62766	7.98843	6.7706	9.72025	7.75425	8.26027	7.87961	7.66231	7.2032	6.54931	7.76511	9.37136	6.57283	9.22305	8.98959	7.13017	8.26439	7.62892	7.58382	9.17362	9.32339	7.55918	7.92594	7.67709	8.31593	7.1909	6.56207	8.0055	7.28924	9.87705	7.02077	10.8225	7.38771	6.86813	9.03318	6.96231	7.17968	8.1414	8.2465	8.47377	9.16719	6.77669	7.31085	7.33376	7.16991	7.49274	7.41943
RP11-589N15.2	8.70836	8.456	9.98596	9.83602	8.66645	9.09338	9.25437	9.14283	8.25059	8.74798	8.86638	9.03628	10.5785	10.7495	6.88934	9.0602	10.0226	8.48036	9.02557	8.15425	8.42826	8.86388	9.14455	10.0566	9.28859	10.4764	8.9651	9.1076	8.7171	9.53983	9.09617	9.19177	8.43724	9.32643	9.23759	7.79786	9.56889	8.44335	8.90382	9.43173	9.22464	8.85764	11.208	8.54719	8.47175	8.31833	8.29463	9.04832	8.93219
RP11-488I20.8	8.91985	6.65749	7.41893	7.2537	6.72382	8.90415	7.37875	6.64609	7.01026	7.12255	6.84898	6.50784	9.11041	8.34199	6.5662	7.06552	8.26435	6.95062	8.35968	7.24654	7.24231	7.35122	7.49318	7.97657	8.98376	7.58133	9.73907	7.38586	6.53071	7.33388	7.91198	7.46341	6.85797	7.31495	6.83663	6.56669	7.6844	6.8437	7.6384	7.6253	7.41511	9.17846	8.10131	6.8083	6.99868	8.82885	7.03728	7.38642	8.48459
LOC101927686	9.11804	10.3281	8.49033	11.0937	9.58954	8.86474	8.62733	9.52621	8.03228	9.51976	9.85068	7.97099	9.70719	9.33766	10.0992	9.10465	8.84167	9.10441	8.01568	8.8368	10.4833	11.3617	8.78377	9.6612	9.79875	9.32182	8.90603	10.2241	8.44209	9.28081	9.69205	10.9056	8.86419	9.34534	8.63074	8.29758	9.92249	8.94584	9.13726	10.3728	9.04867	9.98634	11.0771	7.13883	8.74178	9.4341	9.40249	9.59928	9.24955
RP11-367G18.1	9.11804	10.3281	8.49033	11.0937	9.58954	8.86474	8.62733	9.52621	8.03228	9.51976	9.85068	7.97099	9.70719	9.33766	10.0992	9.10465	8.84167	9.10441	8.01568	8.8368	10.4833	11.3617	8.78377	9.6612	9.79875	9.32182	8.90603	10.2241	8.44209	9.28081	9.69205	10.9056	8.86419	9.34534	8.63074	8.29758	9.92249	8.94584	9.13726	10.3728	9.04867	9.98634	11.0771	7.13883	8.74178	9.4341	9.40249	9.59928	9.24955
LINC01703	7.67867	7.94251	8.45305	7.6581	6.93164	8.3736	7.64443	7.54272	7.62848	8.0707	7.09829	6.78052	8.11814	7.67486	6.68304	8.99217	7.97654	6.98929	7.18592	7.45252	8.34299	8.73843	7.87584	8.48817	9.44379	8.75867	7.44747	9.43319	7.11935	7.76475	8.28297	8.98306	7.4735	7.74389	7.06963	7.30007	8.31525	7.49545	8.67638	9.09233	8.78904	8.80566	8.99013	7.06769	9.34135	7.5944	8.27751	9.2983	8.05538
LINC00960	7.63932	8.02597	8.16849	8.56415	7.46223	7.91075	7.40686	7.57235	8.27069	9.03003	6.93748	7.68598	8.45089	7.23007	6.62415	8.30126	7.69423	6.83228	8.24782	9.14845	8.21971	7.62521	7.5225	7.74662	8.73899	8.9112	7.46983	7.21628	6.63716	8.58098	7.90356	7.40077	6.97539	7.33492	8.27898	7.48073	8.28349	7.1173	7.19448	7.51868	8.58244	8.48368	8.5752	7.32143	8.59491	7.97225	7.12416	8.97343	8.53054
LOC101927809	10.9115	8.63058	9.19934	10.8319	9.27453	8.73938	8.69821	8.36101	8.83267	9.15855	8.45255	8.52682	9.0966	8.10519	8.48181	10.373	9.18346	8.0537	8.2798	8.31477	9.2041	10.1534	9.4595	9.89875	9.38653	8.91982	9.38249	10.0412	8.40303	8.9045	9.48206	9.75406	8.33564	10.3864	9.22347	9.1189	10.2353	8.67229	8.97803	9.1153	9.47322	9.01081	9.47898	8.88284	10.6073	9.36961	8.8803	10.7575	8.97644
RP11-49I11.1	10.9115	8.63058	9.19934	10.8319	9.27453	8.73938	8.69821	8.36101	8.83267	9.15855	8.45255	8.52682	9.0966	8.10519	8.48181	10.373	9.18346	8.0537	8.2798	8.31477	9.2041	10.1534	9.4595	9.89875	9.38653	8.91982	9.38249	10.0412	8.40303	8.9045	9.48206	9.75406	8.33564	10.3864	9.22347	9.1189	10.2353	8.67229	8.97803	9.1153	9.47322	9.01081	9.47898	8.88284	10.6073	9.36961	8.8803	10.7575	8.97644
PKD1P6-NPIPP1	9.26635	10.1687	10.3347	10.3026	10.2204	10.1189	8.64154	9.809	9.79476	10.0715	9.27224	8.33644	9.05162	10.4027	8.60746	9.76207	10.5285	10.4018	9.31793	10.2226	10.3832	9.37344	9.40594	10.3861	10.8018	8.96404	10.8524	9.44533	9.15749	10.4813	10.7707	10.7107	11.2988	9.90603	8.96649	9.55912	9.47935	8.20054	10.1851	9.39313	10.1187	10.3724	9.3773	11.1701	9.28066	10.0679	11.3808	11.0395	9.90006
RP11-221N13.3	9.55296	7.19783	7.8635	8.99993	6.76097	8.00752	7.81699	7.95467	7.26655	7.54481	6.99336	6.56897	8.34627	8.23014	8.9401	7.07621	8.62722	6.74506	7.79341	8.15592	7.40391	8.69926	8.71495	7.61194	7.43628	7.62715	8.92265	7.13203	6.78833	8.87129	7.36429	7.57357	6.96844	8.30449	7.62843	6.87575	9.81032	7.14999	7.22996	7.75868	7.31271	8.51629	7.62438	6.75054	7.06445	7.43129	7.03728	7.6412	8.01434
SNHG17	10.9186	12.1618	9.58365	10.8212	10.8139	11.8203	9.33999	10.0063	9.53053	9.93141	10.7231	10.565	9.52972	10.3982	9.37708	10.7511	9.83242	10.2526	10.528	10.041	9.46618	9.66078	10.8358	9.92201	10.5863	9.55962	9.5384	10.7259	9.77304	10.2935	10.7493	11.1217	10.4942	11.7562	10.2523	9.19763	9.53916	8.77699	9.17634	9.78159	9.89868	9.52897	10.2381	11.0268	10.0911	9.37892	10.482	10.6015	11.2572
RP11-244O19.1	9.54576	8.41553	7.58822	10.8829	6.91942	9.68016	7.6269	8.26466	8.0546	7.63984	7.04713	6.6124	8.46072	9.11635	6.61513	8.17802	8.81662	7.22266	9.36457	7.6471	8.15325	8.30805	10.5853	7.98544	8.15068	8.19157	7.97192	8.53699	6.73138	8.12759	7.90209	8.0003	7.1529	8.92631	7.43097	7.24504	9.02277	7.11914	7.60141	7.96506	7.77232	8.15248	9.88111	7.08332	7.50526	7.9454	7.57457	7.78263	7.39259
RP6-114E22.1	7.61525	7.24005	8.82816	7.32866	8.81028	8.63346	8.08409	6.64609	8.16731	8.02476	7.73296	6.95696	7.72009	8.71535	8.12508	7.97397	8.94125	8.45132	7.84814	7.98838	7.98439	9.21429	7.94033	8.92976	7.75974	7.73861	7.30003	7.20391	6.60808	8.81873	7.37595	9.76731	7.38189	9.37467	9.3303	7.93138	7.71849	7.98365	7.44269	8.82078	8.93328	9.00877	7.78481	8.1314	7.82652	7.46489	9.50379	8.49431	8.36725
CTA-293F17.1	9.43356	8.2667	9.24502	8.08204	8.97733	9.76366	8.35489	8.80626	8.43653	8.20767	8.45188	8.66667	8.76605	7.6944	8.14845	8.7976	9.36792	8.80238	8.24732	8.04272	9.68114	9.11548	8.54227	9.2936	9.27909	9.19549	8.15226	9.48376	9.53578	8.36521	8.56566	9.14354	9.26904	8.17532	9.81728	10.0316	9.25387	9.23656	8.6342	9.26082	8.5389	8.94751	9.11526	9.62747	8.96441	9.30511	8.40789	9.35524	9.13048
LOC101927811	9.43356	8.2667	9.24502	8.08204	8.97733	9.76366	8.35489	8.80626	8.43653	8.20767	8.45188	8.66667	8.76605	7.6944	8.14845	8.7976	9.36792	8.80238	8.24732	8.04272	9.68114	9.11548	8.54227	9.2936	9.27909	9.19549	8.15226	9.48376	9.53578	8.36521	8.56566	9.14354	9.26904	8.17532	9.81728	10.0316	9.25387	9.23656	8.6342	9.26082	8.5389	8.94751	9.11526	9.62747	8.96441	9.30511	8.40789	9.35524	9.13048
TMEM44-AS1	10.0892	11.5582	10.4092	10.1289	9.43908	9.29529	8.38811	10.0384	9.64915	9.18506	10.2925	7.71918	9.35497	10.6776	9.07846	10.0532	9.12544	9.48899	8.35518	8.70687	9.95003	10.7762	8.91416	10.7825	10.9378	10.7526	9.82782	11.5558	10.3086	9.96235	10.2049	10.0658	9.25313	9.07292	9.61406	9.76531	9.9519	9.50885	10.3406	10.5404	10.0168	10.1058	9.9059	9.20706	9.11964	9.64453	9.30406	9.65234	9.60192
RP11-21L23.2	8.05608	8.42008	7.82695	7.7829	7.4257	8.92551	7.53508	7.7249	7.4936	8.58619	7.60983	7.32741	8.42061	8.4672	7.21827	8.02499	8.15192	7.1292	8.75994	8.30168	8.14393	8.38534	8.5477	9.52382	8.27964	8.17006	8.16635	8.99567	7.09722	8.79758	9.39737	7.89845	7.51547	8.30505	7.29879	6.99505	8.72357	8.54313	7.78644	8.67447	8.29265	8.26944	8.22121	7.70771	8.26434	7.82239	7.54714	8.25684	7.59971
VIM-AS1	8.29173	8.16837	7.84894	8.43858	7.19248	8.54253	8.42943	7.81565	8.79817	8.12062	7.12324	6.79826	8.08904	8.20439	6.69778	8.76533	8.74648	7.65623	8.00926	7.66677	8.48087	7.88226	9.02131	8.2661	8.15998	7.95607	8.7666	7.7902	6.62639	8.60533	7.99281	7.40929	10.0284	9.08966	8.51799	6.93423	8.98581	7.52038	8.29387	8.29152	8.19848	8.70864	8.53864	7.78497	7.8727	8.79886	7.65166	8.71409	7.76165
AC074289.1	7.70851	8.20117	8.06641	7.6696	7.09698	8.8501	8.48105	7.6967	7.95228	9.30582	8.99791	9.29417	7.77655	8.08174	6.78873	7.78377	8.08526	8.44876	7.40674	7.48884	10.1303	7.59564	7.73326	7.8424	8.72237	8.57836	7.25231	8.06334	6.647	9.81339	11.5608	8.62608	7.10608	7.81644	7.31614	6.8471	8.00969	7.67023	8.50906	9.23756	8.42038	8.72925	8.3399	8.96416	7.63195	7.74272	7.60428	8.18153	8.34194
RP11-46D6.1	11.8641	10.4374	11.1112	11.7709	10.0909	12.0081	9.63738	11.27	11.1785	11.1989	9.97861	9.90216	10.6486	11.4523	11.0542	10.3084	11.2451	10.82	11.2994	11.2543	11.7434	11.7264	11.8975	11.1477	11.897	12.9712	11.6452	10.7549	10.6121	11.7635	11.004	11.4461	10.7489	11.9855	10.1339	8.30432	12.5577	10.3933	11.0386	11.5459	10.7434	11.6589	11.5443	11.038	11.4202	11.3786	12.3897	10.9098	11.1156
RP11-169D4.2	7.68857	7.48295	7.41893	10.8773	7.20028	10.1798	7.37875	6.77311	8.38291	7.21019	7.18758	6.60832	8.05748	8.06689	7.12793	8.58391	8.21685	6.94224	8.33691	8.26247	8.2375	8.35242	7.8867	7.98213	8.6406	7.73745	8.92254	8.22899	6.61137	9.25445	7.83569	7.69956	7.56663	8.15609	7.49915	6.56669	9.16855	7.05968	7.42212	8.45257	7.84661	8.64534	7.96963	7.11731	8.21083	7.36079	8.06317	8.02541	7.31604
CTD-2194D22.3	8.22865	7.21529	9.4289	9.07445	7.77795	9.04916	8.29216	8.16074	8.8125	8.88243	7.92944	7.50327	8.44567	7.52186	7.94558	7.38219	9.27318	8.12678	7.64147	7.70272	8.54805	8.8034	8.93692	8.68297	7.99035	8.01621	8.34927	7.15685	7.95166	8.22695	8.89758	8.58804	8.58866	8.36532	7.51814	7.31074	9.28026	7.58866	7.41703	7.42001	8.13516	7.62481	9.77745	8.67952	8.75073	7.85388	7.68497	9.00706	7.6858
RP11-390P2.4	11.9098	8.26051	8.94247	8.67716	8.89105	8.98203	12.017	9.06907	8.87838	8.35344	8.94768	8.21136	8.96619	9.63043	8.58634	8.99827	8.39122	8.26725	8.67817	8.30683	9.01072	8.86827	9.15912	8.72419	9.77252	9.19796	9.84684	9.03969	8.22304	9.00117	8.82198	9.69213	9.07953	8.69073	8.89596	8.24792	9.06051	8.38299	9.02593	8.56568	9.27849	9.00217	8.63977	8.23397	8.33375	8.63666	8.27541	8.70435	9.55921
MID1IP1-AS1	8.373	8.65674	9.01113	8.09933	8.17421	8.10069	7.83382	8.36198	7.70248	9.39468	9.18558	6.58834	9.18111	9.56902	7.55881	7.9551	8.88495	8.5214	8.29153	10.0749	8.49547	8.58318	8.59593	9.58237	8.70611	9.67343	8.10368	9.18113	7.55911	9.22855	9.75075	8.92403	7.08161	7.79441	7.92561	7.64528	8.69782	7.7964	8.54342	9.35771	9.15492	9.91245	9.29495	8.07756	8.30372	8.37169	7.90336	8.38998	8.52688
RP11-157I4.4	12.23	11.7538	11.8837	12.4895	11.2743	12.2482	12.3949	10.9203	11.0737	11.8144	10.914	10.8993	10.5554	12.3279	11.5038	11.7524	11.8263	10.5364	11.4259	11.298	12.2304	11.3028	12.2111	13.0095	11.9517	12.1915	12.0229	12.1261	10.442	12.8705	11.0097	12.3876	11.6973	12.3267	11.3911	9.93572	13.4766	11.1022	12.9964	12.051	12.1177	12.0772	11.9899	11.2036	12.1285	11.3956	10.9518	11.8404	12.2909
DSG1-AS1	8.23875	8.55229	8.99771	7.37665	8.25615	8.21545	8.23681	7.77625	8.02026	7.56323	9.65397	6.88903	8.53917	7.23342	6.93331	7.54261	8.46183	9.41007	7.54951	7.47053	9.16346	7.61283	7.56125	7.84293	8.72826	8.67181	7.15189	7.64762	8.7612	8.12993	10.375	8.55003	6.85797	7.78244	6.96568	9.3579	8.40946	8.11823	8.0523	8.72586	8.3713	9.79438	9.5288	7.9122	7.21943	9.15216	7.91113	7.6919	8.35951
LBX2-AS1	8.30982	8.67468	11.1079	9.64927	9.62846	9.66136	9.12177	8.35758	10.2085	8.29985	9.18108	8.02145	8.54763	8.76315	7.9941	10.5317	9.78331	8.41791	8.62541	8.95719	9.03223	9.69282	9.39243	9.79736	9.48607	8.41604	10.7399	9.44775	8.83957	10.2183	8.7747	11.0889	9.28407	9.12171	9.18268	8.93502	10.4084	10.3624	9.13767	9.8815	9.59503	9.0094	9.80368	10.5865	9.17786	9.25027	9.46466	10.4583	9.40005
LMO7-AS1	7.67923	8.34064	8.81519	7.79969	9.04586	8.07028	7.37875	7.83238	7.9918	8.07238	8.69139	8.63565	7.99187	7.46419	9.03776	9.23053	8.08126	7.80391	7.30091	8.19237	9.79122	7.82274	7.92572	9.05095	8.27227	7.90629	7.92771	8.33609	8.20021	9.30475	8.26874	9.66263	8.7711	8.70539	8.65055	7.5663	8.46592	8.50943	9.18675	7.82118	8.71019	7.91574	8.11438	8.31134	9.30543	8.68003	7.56755	11.2719	7.78255
PCAT7	8.09276	7.91324	8.41578	8.93161	8.02385	7.78007	7.37875	6.85546	6.9972	8.63358	6.99696	6.67283	7.84621	8.83771	6.83165	7.39285	7.47433	7.07292	7.34456	7.24654	7.55161	7.60843	7.73876	7.9068	8.55688	8.82389	7.10317	9.21152	6.5908	7.70655	8.29223	8.29138	7.54938	8.08369	6.83663	6.7125	7.70198	7.08452	8.33971	8.38025	8.13733	7.99961	8.80341	9.7831	8.64628	9.12623	7.40695	8.01866	8.47725
RP11-483L5.1	8.48047	6.7195	7.94497	7.43987	8.02285	8.37861	8.49683	7.84894	7.74485	8.37731	8.43049	7.26472	9.27964	8.41856	8.18132	7.56371	7.9922	7.27841	7.35947	8.04608	8.38658	8.67542	7.61458	7.72623	8.28076	8.13302	8.48742	7.13203	7.87665	7.54737	7.81753	9.17645	7.79149	8.42149	7.13775	7.27918	8.75473	8.10697	7.27377	7.70267	7.36449	7.8323	7.79498	7.1955	7.07745	7.67996	7.03728	7.78097	7.50008
A1BG-AS1	8.87256	8.60756	8.20879	7.41977	8.59124	9.28572	7.64018	6.81106	8.3728	8.33608	7.34272	6.84129	8.27827	9.01411	7.95032	9.09825	8.13788	7.6169	7.92854	9.92921	8.51434	8.0508	8.4876	8.23778	8.70054	8.53239	8.96718	8.43369	6.68891	9.29623	7.869	7.48499	7.86392	7.69743	8.45588	8.27245	9.28501	7.95476	8.78615	8.29354	8.12576	8.93235	8.32258	7.73641	7.5217	8.79645	7.74328	7.84845	8.43303
CD27-AS1	9.69156	10.6595	9.55964	8.46143	9.38857	8.99794	8.79155	8.9751	8.87543	10.1678	9.08844	8.48298	8.77902	9.09707	8.53698	10.019	9.42035	8.86308	8.14045	9.37009	10.5735	10.1293	9.21094	9.66581	10.0627	9.76424	9.54421	10.0759	9.44503	9.76642	9.62958	10.2516	11.069	9.6802	10.007	9.22119	9.48996	9.30625	9.19089	9.63689	9.78829	8.98625	8.70656	10.401	9.46703	10.0655	11.0503	10.1604	10.5472
CTD-2532K18.2	8.29432	7.54932	7.74108	12.6186	6.93393	8.23526	7.72133	7.29902	7.03517	8.26028	6.90729	6.87057	8.04948	8.34709	8.47634	7.76123	7.86465	6.9047	7.84829	7.52482	7.24231	9.41596	8.85265	7.61265	7.68302	7.86712	8.42993	7.26476	7.07396	7.99372	7.36046	7.2792	7.57282	7.83884	8.30736	7.1625	8.72351	7.57027	7.19934	7.84849	7.4115	8.17466	8.24154	7.64321	7.32238	7.45381	7.03728	8.91627	7.85357
CTD-2523D13.2	8.50694	9.74756	8.47977	9.06761	7.27843	8.17865	8.80197	8.47588	8.14647	9.02789	7.55049	6.76538	8.64413	7.9427	6.90737	8.17499	8.65833	7.57394	8.6278	7.76875	9.55981	8.45518	8.04738	9.16099	9.33395	9.44032	9.10808	8.23548	7.29579	8.29279	9.00478	8.95836	7.37412	7.7325	6.98129	7.76017	8.78816	7.53361	8.72301	8.95154	8.73523	8.30557	9.09684	8.64636	8.66254	9.47517	7.67008	8.30554	8.58937
LOC102724301	8.50694	9.74756	8.47977	9.06761	7.27843	8.17865	8.80197	8.47588	8.14647	9.02789	7.55049	6.76538	8.64413	7.9427	6.90737	8.17499	8.65833	7.57394	8.6278	7.76875	9.55981	8.45518	8.04738	9.16099	9.33395	9.44032	9.10808	8.23548	7.29579	8.29279	9.00478	8.95836	7.37412	7.7325	6.98129	7.76017	8.78816	7.53361	8.72301	8.95154	8.73523	8.30557	9.09684	8.64636	8.66254	9.47517	7.67008	8.30554	8.58937
RP11-326C3.7	8.89194	8.37814	8.49306	8.13597	7.72887	8.39291	7.72163	7.72379	9.00244	7.6525	7.39173	6.67762	8.52663	8.84799	6.8438	8.10853	8.54062	8.16947	7.89815	7.70278	8.99877	8.35359	8.05278	8.06266	8.5941	8.19007	8.27069	7.73436	7.11828	8.44876	8.12201	9.24521	7.47385	8.87722	7.9488	7.02678	9.00363	7.75232	8.51093	8.4611	8.32626	9.10854	8.08613	7.45412	8.89022	8.3335	7.71712	7.90225	8.26445
LINC00626	7.53891	8.23365	7.63356	7.34155	8.01654	7.6651	7.37875	6.6808	7.01015	7.33721	7.01756	6.75793	7.71325	7.81078	6.5662	10.3666	7.47433	6.83637	7.15184	7.27706	8.51454	7.39289	7.78277	9.40113	7.47554	8.16561	7.25295	7.13203	6.99787	9.27199	7.4157	8.78737	9.29406	7.31495	8.05117	7.18357	8.86921	7.74426	9.27945	8.43244	8.52717	7.49574	7.65923	7.00138	7.48885	9.20769	7.03728	8.03889	8.58321
RP11-304L19.2	9.07892	7.76043	9.85753	7.32032	8.21608	8.86099	8.77524	9.58253	8.81529	9.42653	8.63152	8.42461	9.354	10.3211	8.47802	9.57835	10.1078	9.67888	8.82512	9.65585	9.20231	8.70949	8.55387	10.004	9.93936	8.54344	9.18856	9.40901	9.30822	9.41672	9.79198	10.1345	10.2092	8.76621	9.52829	9.43547	9.37026	8.59386	8.6317	9.49795	9.20631	9.86035	8.82031	10.2664	9.18992	9.2019	10.3015	7.55681	9.19259
RP11-283G6.3	7.9627	7.62281	8.12726	7.42877	6.75242	7.73717	7.68286	7.46574	7.77006	8.56677	7.30087	6.53022	8.15056	8.23131	8.05404	8.32186	8.68504	7.03388	7.54093	7.37901	7.84353	9.37362	8.20075	8.05812	7.76377	7.67195	8.8769	7.24454	6.67358	8.37746	7.67479	8.72518	6.99868	7.96718	6.99749	7.06957	8.51359	8.74519	7.50478	7.87021	7.31774	8.21617	7.90386	7.16937	9.75799	7.60154	7.70294	9.98956	9.23389
RP11-166P13.3	8.46387	7.85121	8.946	8.69666	7.39335	8.62683	7.50841	8.32522	9.18524	8.01207	7.19411	6.76568	8.17415	8.2944	7.19914	9.51105	8.26699	7.49449	7.76746	7.83577	8.67358	8.69152	8.05165	8.43812	8.24014	8.4907	7.96038	9.20758	7.81274	8.32619	8.43553	9.49898	7.45146	8.3157	7.44468	8.5443	8.8896	8.31163	7.61211	8.57126	9.24244	8.88588	8.85458	7.44785	9.11147	8.82478	8.21728	8.05124	7.89252
PTOV1-AS2	9.86787	9.82069	7.95276	8.61158	8.83716	8.55015	7.83011	8.85392	9.02723	8.34057	8.84811	8.17138	7.84508	10.051	7.51747	8.96414	10.0317	9.32158	8.35469	8.92906	9.66913	9.0435	8.15234	9.37521	9.48116	8.0679	8.25982	8.73758	8.45394	8.68747	8.63993	9.127	9.93991	9.59178	8.73038	8.42934	7.9504	7.82298	9.30572	8.729	8.82102	9.76218	8.23775	9.23196	8.15379	8.89832	9.09106	9.24604	8.43987
AC079305.10	8.33966	8.13205	8.96944	7.98997	9.24243	8.81953	8.48334	8.26855	8.18543	7.66536	9.58401	8.38289	9.56794	7.45529	6.93865	7.2673	8.04322	7.95958	7.86865	7.90336	8.88622	8.19545	7.88295	8.53854	9.32529	9.93025	8.21502	8.00416	8.69109	8.79995	9.28765	8.32611	7.71721	7.94116	8.50771	7.56069	8.70864	8.43155	8.78734	8.34995	9.21753	9.19161	8.40585	7.93824	7.82035	7.95436	7.7803	7.77568	8.68508
RP11-20I23.11	8.40702	8.18118	8.86106	8.39872	8.28205	10.1071	8.07607	8.44869	8.82187	8.16032	7.86433	7.74576	8.19096	7.71273	7.50413	8.70008	9.13476	8.0248	8.61361	8.5945	9.41764	7.92536	8.38018	8.66352	8.87252	8.25853	8.49797	8.71302	7.88128	9.45607	9.56738	8.80572	9.02891	7.78313	7.67096	8.59158	8.73142	8.32745	9.09979	8.47834	8.69819	8.70003	8.57859	7.92515	8.07022	9.8701	9.06351	9.22119	9.75402
CTC-510F12.4	10.034	8.2805	9.38617	9.59181	8.53997	9.84054	9.99078	9.2014	8.58284	9.17672	8.80705	9.32776	10.0326	7.74281	8.01582	8.34521	8.33254	8.40137	9.14969	8.89925	9.69659	8.01395	8.92063	10.0347	9.26809	9.94912	8.40605	7.87267	8.5771	8.76759	9.07639	7.98095	8.43064	9.90228	9.48886	10.6635	9.31493	8.96555	8.53371	9.10902	10.5974	9.37194	8.94616	8.27664	8.81226	8.43378	7.15797	9.33384	10.8108
LOC107986453	7.51942	7.91038	8.76618	9.26927	8.36116	9.08808	7.64801	7.21925	7.18411	7.3357	8.45506	6.72795	8.1447	7.29187	6.5662	7.94903	8.51934	6.96957	7.78937	8.59413	9.02227	7.84835	7.77494	7.44621	7.99923	8.3013	7.26662	7.37198	8.0604	8.17925	7.92374	8.86419	9.80988	7.488	8.39104	8.02234	7.85211	7.87731	7.19364	7.61475	7.28552	7.68603	10.3554	7.64506	7.14495	9.45858	7.34536	7.38642	8.66531
CTD-2256P15.2	9.24092	9.27694	9.64555	9.50474	8.31307	9.5006	7.73244	8.72851	9.22454	8.58971	8.39216	7.49908	8.68368	9.37358	8.01839	8.03881	9.51499	8.18854	7.89127	7.80488	8.31554	9.50375	8.66541	9.21049	9.13062	9.08113	8.25371	9.2146	7.92147	8.22969	8.69529	9.29317	7.8082	8.29171	7.54932	7.61236	9.42832	7.77124	8.16244	8.96251	9.03411	9.01988	10.6221	9.27569	10.4203	8.07234	8.09066	9.15889	8.16953
DGUOK-AS1	9.54484	9.4861	9.24764	9.48457	10.209	9.08266	10.5146	9.958	10.4934	9.3699	8.58828	10.2517	8.99705	8.99623	8.51516	7.77879	8.80169	9.3364	8.83101	9.18793	9.27717	10.0749	9.20592	9.88292	9.7439	10.1966	8.29721	9.21519	10.6397	9.65623	11.206	8.98364	9.65388	9.01242	9.95939	10.2451	9.28431	8.93618	9.16203	9.4491	9.91958	9.93894	9.42255	10.7193	7.98751	8.99786	8.41623	8.87633	10.3517
LOC101927765	8.38679	8.69691	9.35614	8.56103	8.63283	9.60083	8.35637	9.23905	8.59386	10.0924	9.49307	8.60808	9.05609	9.33488	7.26382	8.74633	7.8821	8.41163	7.75687	7.74991	8.76156	8.06816	7.98207	9.1944	9.53133	9.18165	8.17909	8.83934	8.09664	8.16021	8.90238	9.49085	9.15856	8.97578	8.15882	8.2125	8.7893	8.24697	9.05897	8.62596	8.69148	10.2473	9.17467	8.43657	9.0839	8.61336	7.97287	9.30215	8.42176
RP5-827C21.4	8.38679	8.69691	9.35614	8.56103	8.63283	9.60083	8.35637	9.23905	8.59386	10.0924	9.49307	8.60808	9.05609	9.33488	7.26382	8.74633	7.8821	8.41163	7.75687	7.74991	8.76156	8.06816	7.98207	9.1944	9.53133	9.18165	8.17909	8.83934	8.09664	8.16021	8.90238	9.49085	9.15856	8.97578	8.15882	8.2125	8.7893	8.24697	9.05897	8.62596	8.69148	10.2473	9.17467	8.43657	9.0839	8.61336	7.97287	9.30215	8.42176
HCG11	8.67003	9.28367	10.6177	9.2801	8.87031	8.45589	7.55794	7.70833	9.02043	8.07247	7.93609	8.1669	8.64655	7.64218	8.44393	9.36327	9.53128	7.51796	9.2107	9.85452	10.05	9.6685	8.96003	8.45458	8.55249	9.11873	8.78758	8.88223	9.06769	8.62308	9.70288	9.10655	8.48242	8.97457	8.17964	8.39575	10.1431	9.33046	8.76301	9.47543	9.59829	9.49125	9.00937	9.41518	8.57949	10.4872	10.0029	9.15428	8.22985
RP11-182J1.12	8.76549	10.1103	7.73894	9.20067	6.99067	8.28322	8.51188	8.3934	8.20742	7.35658	7.3447	6.63172	8.72465	9.40116	7.06105	8.02094	9.31861	8.46308	7.88161	8.31203	8.77994	7.69561	7.78075	8.96762	8.47303	7.93338	8.53182	7.88144	7.55118	8.20324	8.91182	8.39585	7.72009	8.10198	7.4451	7.34807	8.07829	7.19051	8.7206	8.08818	9.46978	8.62137	8.9911	8.02199	7.62912	8.36842	8.30628	8.44071	7.76608
LINC01234	7.499	6.77509	7.43643	10.4313	6.72757	8.44789	7.37875	6.64982	7.01532	7.15686	7.03784	7.04046	7.75437	10.0235	6.67979	7.57182	7.50357	6.81506	7.03602	8.20395	8.01137	9.80916	7.51199	7.96631	8.18098	8.34437	9.00352	9.55708	6.94609	7.38679	7.44959	7.55417	8.92372	7.32335	7.97193	6.58567	7.86131	7.27322	9.51255	9.93767	8.63086	7.84757	7.62438	7.31945	7.99776	7.33447	7.08276	7.39187	7.34086
RP5-1097P24.1	7.40347	10.0605	7.57095	7.30877	7.17459	8.86238	7.37875	6.8962	7.24307	7.40027	6.84898	8.41683	7.66289	7.08317	6.5662	7.03912	7.51156	6.93492	7.10418	7.24654	9.22387	7.35122	7.49318	7.75953	8.97993	8.79364	7.10317	9.49037	6.53071	8.58172	8.43734	8.75597	6.85797	8.26584	6.97195	7.96838	7.71526	6.8437	8.60113	8.21391	7.66453	8.4689	8.19513	8.59791	7.05199	7.32333	7.03728	7.75213	7.44341
AP000487.5	9.39032	10.6066	8.35691	9.82469	7.44631	8.18943	7.76787	7.184	8.85749	7.82411	7.6881	8.19453	8.29779	8.27029	8.25938	10.4918	8.30886	8.58606	7.92789	7.96517	7.85653	9.71722	10.3685	8.66511	10.7926	7.89662	7.97829	7.77847	7.8256	10.2332	8.8973	10.1191	8.11222	8.93352	7.32337	7.21136	9.83874	6.92043	7.84347	9.36339	7.91739	8.67535	8.12173	8.49031	10.1885	8.21294	9.50599	9.55648	7.58798
SMIM10L2A	7.77709	9.10003	8.75888	7.77901	9.26114	7.81494	7.39021	7.11796	7.42682	7.47199	8.12368	6.96753	8.00307	7.7643	7.19398	7.61242	7.75269	7.49867	7.10689	8.02601	9.79396	7.81298	7.51108	8.47977	8.94763	8.8916	7.36592	8.34406	7.46388	8.11348	9.72111	7.54147	8.97817	7.66758	8.84394	6.64306	7.87083	7.39095	9.36143	8.96504	8.56195	8.80613	9.63352	7.66212	7.34506	9.29309	9.4637	7.69552	7.3986
ATE1-AS1	7.40347	8.35719	7.56238	7.45374	6.72382	7.75833	7.64094	7.06654	7.45043	7.17316	6.84898	6.75277	7.85703	7.34133	6.63919	8.40639	7.8199	6.89703	7.10991	8.10022	8.52473	9.2141	8.38364	8.35321	8.56563	8.25745	7.15554	8.19466	7.16401	7.69973	7.86796	9.31815	7.73499	7.50555	6.97446	6.8618	8.69672	7.53541	7.0891	7.51819	7.78916	7.48978	8.53976	7.16897	7.88435	7.90086	7.64629	8.60922	7.76279
RP11-253E3.3	8.62684	8.36928	8.86437	9.61825	7.9452	9.4034	7.50181	7.93536	8.47965	10.3601	8.75695	7.60444	9.2308	8.84237	8.7236	8.64992	9.88586	9.25684	9.25869	8.9611	9.06174	8.87204	9.70416	8.71517	9.13895	8.55918	9.84305	8.48288	8.27877	9.54713	8.91269	8.377	9.6935	9.26752	7.94853	8.10021	9.29017	9.19361	8.84821	8.94093	8.75494	9.33735	8.81374	9.68627	10.2421	9.51596	8.41148	10.2417	9.63827
RP11-705C15.5	9.47201	10.4588	10.2629	9.07105	8.62651	9.03299	9.02711	9.31908	10.4712	10.3373	8.30945	8.48623	9.43899	9.07401	8.32897	10.65	9.9416	9.152	8.7604	8.62275	10.0182	10.3444	9.41485	10.1902	9.89269	9.34616	8.94175	9.50892	8.76575	9.48619	9.21396	9.50677	9.12635	10.4434	8.29172	8.33217	9.74377	9.9242	9.14054	8.80947	9.37345	9.02136	9.27831	9.3568	10.6438	9.1993	10.5391	10.8758	9.92889
RP11-750H9.5	7.80443	8.44452	8.27771	7.58886	7.029	8.17655	7.43184	6.94639	7.96224	7.63281	6.96679	6.54093	8.10761	8.14513	6.75717	8.5051	9.09069	8.16367	7.76498	8.06525	9.24433	8.35826	8.1839	8.07568	8.43735	8.41194	8.63544	8.24094	6.78908	9.21384	7.92997	7.58482	7.91057	7.98092	7.63922	6.98721	8.74453	7.71984	7.89738	8.82101	8.06877	8.89073	9.09013	7.52449	8.35495	8.02423	8.53301	8.62476	7.43735
FOXD3-AS1	9.29254	8.94501	7.91309	8.14793	9.80391	7.80655	7.51804	6.70108	7.21903	7.87511	8.47956	9.02095	7.66289	7.68276	7.89542	9.75953	7.5055	7.66215	7.20167	7.93366	8.13503	9.2582	8.20462	8.37556	7.76077	8.2362	7.27374	8.89482	7.54585	8.30836	7.84054	7.24549	10.4206	8.29799	8.37624	9.01184	8.41322	8.1432	7.53958	8.09667	7.32501	8.33679	8.552	9.28832	8.80477	7.59957	8.41506	7.84789	7.39292
RP1-68D18.4	9.35112	7.61643	7.66985	9.70003	8.19318	8.38053	8.2394	9.12616	7.59754	8.94914	8.86269	7.04036	8.42876	9.18816	8.2973	8.16905	9.02312	7.72283	7.66364	7.69887	9.44953	8.05159	9.44218	8.16008	7.92469	7.90887	8.28389	7.87623	7.698	8.831	8.38133	10.7794	9.93446	8.89085	8.57741	7.67697	8.74504	7.63837	8.20704	8.6688	7.97508	8.82717	8.12451	9.10909	7.77244	8.78471	7.84577	8.70275	8.136
LINC00520	9.16926	6.68133	7.95946	7.78415	6.78958	8.73162	11.7052	7.30172	8.07869	7.9104	7.0917	7.01796	8.39187	8.00216	6.58526	7.15125	7.66935	6.91088	8.2558	8.04559	8.53237	7.70737	7.68981	7.57284	8.2649	10.026	7.56525	7.41271	6.60476	8.2712	7.87658	7.61223	6.96031	8.64488	7.73686	7.81288	7.85916	6.85218	8.07457	7.91707	7.3311	8.34013	7.86219	6.93825	7.19577	7.4984	7.08895	7.76959	7.97094
RP3-512B11.3	10.8949	8.95242	10.856	11.5499	10.0552	10.4472	11.0557	10.6029	9.5943	8.8277	9.57078	9.29941	10.9729	9.4726	9.55108	9.87723	9.98531	9.87667	9.67843	10.0082	8.74585	10.992	9.5156	8.88752	9.29126	9.48868	8.8502	8.88081	8.78081	8.90722	9.7492	8.85899	9.38376	9.42407	9.02665	10.6901	9.51383	10.5214	8.68529	9.19812	9.32374	10.5438	11.173	9.8414	9.59579	10.1811	8.35339	9.63373	9.91279
RP4-660H19.1	7.8661	9.74162	8.62578	8.10233	8.02065	8.79768	7.43179	6.69159	7.34626	8.74878	7.91777	7.63715	8.39314	7.20077	8.30619	8.31153	7.47433	8.55598	7.50553	8.08703	7.95138	8.66727	7.49318	8.31176	7.97558	8.26632	7.87638	8.40836	6.53071	8.29144	8.39231	7.24618	6.90609	7.31495	7.38873	7.40866	8.489	8.41313	8.07891	8.04755	8.41766	8.89672	8.74835	8.42838	7.76185	8.08683	8.0387	7.40825	7.1692
PLBD1-AS1	7.85543	7.79315	10.4229	8.08614	7.75113	8.57158	7.37875	8.7016	8.2318	8.5654	8.04326	6.94004	9.49274	8.539	8.03787	8.76979	9.31989	9.40925	8.43507	8.68478	8.72966	10.0478	7.49318	8.21672	8.25979	8.3396	7.72408	8.01659	9.95722	8.32644	8.31059	9.58531	7.89537	7.6295	7.29227	8.08722	8.44453	10.6246	7.34613	9.32535	9.48791	8.53805	8.63614	10.1084	8.66519	8.81449	8.2462	8.88463	7.25277
RP11-195F19.9	7.64311	8.45361	8.64101	8.1323	7.6147	8.21298	7.37875	7.73251	7.91235	7.69824	7.6581	7.91791	8.3064	8.20063	8.39318	7.99511	8.05706	7.14514	10.0248	9.37306	8.78949	8.74909	8.2611	9.33234	8.83314	7.9057	8.81531	9.3139	6.79916	8.18027	8.90198	7.70372	7.4669	9.08572	7.54103	7.24532	8.29289	7.41459	8.85026	7.98796	7.89701	8.37682	8.88033	7.80441	8.40961	10.6691	7.50606	9.10684	8.38172
ILF3-AS1	10.0542	10.166	11.4281	10.669	10.2655	10.1802	9.57303	11.1642	11.3435	9.92118	11.449	9.96931	10.7681	10.9813	9.44314	10.4959	10.8158	10.7101	10.6697	9.82607	11.0729	10.531	10.4871	11.0156	11.0997	11.8374	10.5111	10.7641	10.43	10.6808	10.1087	11.1689	9.95854	11.1334	10.9515	12.0604	10.9875	10.2429	10.2135	11.33	10.873	11.352	10.7213	10.216	10.8635	10.3883	10.0074	11.3024	11.3969
TTTY15	7.50732	8.71489	7.62699	7.32418	6.95575	7.63781	7.39573	8.14357	8.86165	7.42051	7.82368	6.56994	7.67519	9.38618	6.71006	9.138	8.70543	7.03506	7.23115	9.10414	8.04812	7.65346	8.11387	7.87451	9.00299	7.58527	8.87239	7.37049	8.96071	8.0011	8.06484	7.34695	10.1826	7.52979	7.15814	6.66388	8.32412	8.5191	7.00893	7.32499	7.1702	7.23459	9.23001	6.75054	6.99868	8.9562	9.921	7.92038	7.2605
RP11-284F21.9	8.74065	6.84619	8.47201	7.32822	7.91922	7.75538	8.42538	6.75633	7.64151	7.12255	8.3921	6.7273	7.7369	7.6415	9.1058	8.56308	7.48457	7.40599	7.08585	7.3352	8.70706	8.05893	7.49318	9.2418	8.30767	7.95016	7.74183	10.1753	7.80399	8.57082	8.33798	10.1418	8.45761	7.34767	7.26305	8.04659	7.7013	6.88201	9.14345	7.35627	7.31031	7.92541	7.64514	7.10659	7.03103	7.71018	7.06908	7.5469	7.20855
AC091729.9	10.5507	9.92655	9.31354	9.30239	9.16242	9.26112	7.84013	9.00157	8.48874	8.1675	8.44783	7.8902	8.82354	9.05284	7.59037	8.30178	9.258	8.82163	8.21124	9.21834	9.20579	10.324	9.00451	10.0407	10.6599	9.46285	8.75818	9.72315	8.77554	8.1875	8.87813	9.8422	8.22048	8.44018	8.28601	9.711	9.37082	8.51063	9.45487	9.40342	8.91495	9.14431	10.3954	9.84021	8.84426	8.86906	9.27591	8.98552	9.59666
LINC02035	9.17458	10.1294	8.27391	10.0532	7.89419	10.4354	7.69454	8.75705	8.26514	9.64025	8.02872	7.34351	9.24086	8.9694	8.86098	9.17742	9.04886	9.41217	8.66118	9.17647	10.4766	10.4527	9.13164	9.09408	9.67675	10.5922	9.29128	9.30968	9.27993	9.67184	9.27606	9.35863	8.76201	8.82556	8.0288	8.09234	9.50937	8.89987	8.69244	9.45904	8.86523	9.54948	10.3086	8.05601	9.12229	10.1708	9.48663	9.26328	8.1365
RP11-155G14.6	9.59859	9.40635	7.60229	7.98397	7.87981	7.99956	8.31802	7.33841	7.64694	8.43338	8.11694	8.20839	8.31199	8.56091	9.1144	7.29714	8.55972	8.09235	7.69076	8.12761	8.84876	8.16083	8.57868	8.69813	9.22092	8.66576	8.16972	7.72504	7.35363	8.71455	8.41273	8.63683	8.78202	8.4126	7.55687	7.21489	8.02504	7.86959	8.76005	7.90717	7.86684	8.51458	8.13957	8.3841	7.60954	8.07989	7.64887	8.66371	9.62491
FOXN3-AS1	8.95082	8.59265	10.1293	9.09312	8.35714	9.31683	11.0227	10.1227	8.91996	7.80399	8.04684	7.93538	10.2699	8.14588	7.66602	8.22988	9.6207	8.44041	8.32625	9.95979	8.88861	10.3973	9.58882	9.34033	9.4638	10.5277	8.56624	9.31793	8.7667	8.42249	8.88751	8.81159	8.58168	8.35904	8.96302	8.69331	10.3032	9.75875	9.31666	9.98684	9.29326	9.44171	9.24751	8.14379	8.60006	8.66963	7.985	8.76989	10.0525
BBOX1-AS1	9.62024	9.25418	10.0907	9.45142	10.2548	10.0986	10.47	9.06324	9.04875	9.56013	10.4946	8.49226	10.141	9.28113	8.69844	10.239	9.03316	8.30894	9.25488	8.34383	9.64306	9.56756	8.90183	9.27799	9.44577	9.7201	8.58214	9.74403	9.16294	9.22781	9.81559	10.1367	9.41568	10.1726	9.91622	9.29537	10.3655	8.02473	9.45864	10.1252	9.6264	9.55571	9.82433	9.04975	9.78698	9.61836	10.39	9.51982	9.78237
LOC105378753	8.81353	7.64684	7.8108	9.78092	6.94817	10.0908	8.8401	7.80416	7.61284	7.44837	6.97961	6.5663	8.28029	8.21676	6.63959	7.43595	8.76419	7.09745	7.39417	7.56544	7.79389	8.84187	8.34966	7.68978	7.94362	7.73917	7.68828	7.53132	6.5775	7.92253	7.47763	7.73755	6.93412	8.33536	7.24288	7.59569	9.52222	7.55047	7.20425	7.83061	7.42902	8.02991	9.15142	6.8929	7.45555	7.72754	7.4648	7.9662	8.41632
RP4-794H19.1	8.81353	7.64684	7.8108	9.78092	6.94817	10.0908	8.8401	7.80416	7.61284	7.44837	6.97961	6.5663	8.28029	8.21676	6.63959	7.43595	8.76419	7.09745	7.39417	7.56544	7.79389	8.84187	8.34966	7.68978	7.94362	7.73917	7.68828	7.53132	6.5775	7.92253	7.47763	7.73755	6.93412	8.33536	7.24288	7.59569	9.52222	7.55047	7.20425	7.83061	7.42902	8.02991	9.15142	6.8929	7.45555	7.72754	7.4648	7.9662	8.41632
SMIM25	8.51691	7.05814	7.41893	7.7382	7.89098	9.09102	8.67533	7.0404	7.54859	7.87791	6.84898	6.50784	8.04421	7.94507	8.92483	7.9238	9.42857	9.17891	8.02086	8.74575	8.39402	7.80989	8.38826	7.45814	8.17319	9.10035	8.28879	7.46016	6.87496	8.89382	7.80841	7.58956	7.67939	8.4893	8.50731	7.7897	10.5547	7.89914	7.41088	9.17875	7.50562	9.41364	7.7383	8.09685	7.98309	8.1657	8.08432	8.76324	7.1692
LINC02031	8.15722	7.20674	8.28757	7.50167	9.51277	7.94933	7.61376	7.68901	7.79651	9.3201	7.91003	7.92115	9.75629	7.85418	8.30641	7.09482	8.45308	8.32032	7.55708	8.45172	9.77686	8.82184	7.57065	7.49096	10.2516	8.30596	7.36347	7.51661	10.014	7.37837	7.58305	7.24259	10.2261	7.66333	8.1912	9.37213	7.99068	10.2346	9.54668	7.79336	7.70026	7.35623	7.82595	7.62175	6.99868	10.7703	7.76856	7.51718	7.54284
RP11-34P13.13	8.85375	8.76224	8.3695	8.15406	7.86267	8.08458	7.57878	8.06705	7.73366	7.98768	7.72469	6.64043	8.25302	9.97071	7.69198	8.45778	9.66893	10.0877	7.95229	8.16739	9.55152	8.09017	8.13958	9.71103	9.5869	8.04441	8.16223	9.35417	8.59296	8.65601	9.65277	10.453	8.26453	8.13357	7.51123	7.09185	7.96236	7.43717	9.40754	8.32543	8.73089	8.86429	8.57727	9.35346	7.6897	8.17414	8.56455	8.04472	7.74899
RP11-123M6.2	9.62788	10.5064	7.47255	7.77375	7.1047	8.00435	8.57424	8.62032	7.5178	8.60994	8.14116	6.85786	9.11966	10.3155	7.48669	8.67057	9.87256	8.32393	9.6327	8.5389	8.59554	8.43443	8.09308	8.07871	8.16193	7.82149	9.64611	7.3685	7.12855	10.042	8.67552	8.98291	8.63016	8.31621	8.33526	7.01536	9.01576	6.94246	8.16321	8.04887	8.61542	8.22088	8.2826	8.44369	7.37073	7.97379	8.32274	9.38752	9.08243
SNHG3	10.0874	8.55682	7.92645	9.31958	10.5867	9.23139	8.06364	8.8104	8.33065	10.5119	8.30415	8.12898	9.67595	10.5903	8.64743	9.38251	9.68061	8.38624	8.47933	9.19551	7.79918	8.31547	8.41169	9.08441	8.92801	7.92635	10.0237	8.78067	7.5347	8.65422	8.57164	8.49719	8.02318	8.94748	8.25542	8.49826	8.96446	7.33717	7.84908	8.52202	8.00539	9.2207	8.7491	8.9501	8.39825	8.57769	8.33991	9.21029	8.20981
LOC100130331	9.20202	8.16149	9.42005	8.73406	9.0346	8.8135	7.99784	8.25684	9.97704	8.78977	8.62591	7.25159	9.33842	8.83271	8.33989	8.46541	9.47003	8.2888	9.45563	9.95216	8.81933	8.37409	8.85841	9.16111	8.59476	9.81516	9.37808	8.6536	8.14865	9.73349	9.33363	9.36226	8.20548	8.57503	7.73648	7.73102	9.04767	8.77906	8.62352	9.42789	8.19459	9.16111	10.159	8.41964	9.0034	9.27644	8.3974	8.68209	8.41404
RP11-193H5.1	9.20202	8.16149	9.42005	8.73406	9.0346	8.8135	7.99784	8.25684	9.97704	8.78977	8.62591	7.25159	9.33842	8.83271	8.33989	8.46541	9.47003	8.2888	9.45563	9.95216	8.81933	8.37409	8.85841	9.16111	8.59476	9.81516	9.37808	8.6536	8.14865	9.73349	9.33363	9.36226	8.20548	8.57503	7.73648	7.73102	9.04767	8.77906	8.62352	9.42789	8.19459	9.16111	10.159	8.41964	9.0034	9.27644	8.3974	8.68209	8.41404
LINC01807	8.61454	6.83198	8.46477	8.80677	8.49066	9.08024	7.37875	8.42263	6.9972	8.69521	6.84898	6.82227	7.73353	8.04198	6.5662	9.19533	7.47433	7.79344	7.15312	7.77789	7.24231	8.78307	7.49318	8.12545	8.24775	7.58133	7.4663	7.3808	6.53071	8.23013	9.2549	7.22317	6.85797	7.31495	8.84769	7.93591	7.6844	7.10406	7.00372	7.34989	8.54166	9.46987	8.29505	8.11011	8.23314	7.32333	8.6077	8.058	9.04608
LOC100505501	7.79808	7.88013	7.95839	9.56331	7.07511	9.01514	7.57614	8.33427	8.81855	7.68824	6.99419	6.84584	7.89536	8.38163	6.65363	8.01749	8.32388	7.2626	8.53811	7.58853	8.25587	7.75384	7.98575	7.62923	7.84213	8.10045	7.53334	8.17523	6.58312	8.09108	7.49311	7.7381	7.07457	8.14754	8.06407	6.66202	9.04373	6.95889	8.34619	8.96067	8.19889	8.29844	8.76778	8.19308	7.71235	7.77052	9.07581	8.36985	9.23046
RP11-25K19.1	7.79808	7.88013	7.95839	9.56331	7.07511	9.01514	7.57614	8.33427	8.81855	7.68824	6.99419	6.84584	7.89536	8.38163	6.65363	8.01749	8.32388	7.2626	8.53811	7.58853	8.25587	7.75384	7.98575	7.62923	7.84213	8.10045	7.53334	8.17523	6.58312	8.09108	7.49311	7.7381	7.07457	8.14754	8.06407	6.66202	9.04373	6.95889	8.34619	8.96067	8.19889	8.29844	8.76778	8.19308	7.71235	7.77052	9.07581	8.36985	9.23046
SNHG1	11.281	11.4837	11.2803	11.9305	10.9671	11.9495	9.97904	10.5802	11.1446	11.1836	11.2389	11.7388	10.0079	11.9934	10.6616	12.0417	10.9999	10.6588	10.7041	10.6133	10.5845	10.232	11.0406	11.2733	10.8112	9.2978	11.0811	11.2085	10.28	11.2165	11.1878	12.0379	11.0109	12.1162	11.0717	11.1392	9.73434	9.08558	11.3214	10.6339	11.3605	11.1365	9.54895	11.2583	11.8814	10.2168	11.1092	10.8591	11.04
KANSL1-AS1	7.58388	7.63246	8.88781	7.77239	8.91989	8.29086	7.65339	7.85538	9.2712	7.79613	7.41472	9.83626	9.72067	7.52596	6.77691	8.04775	9.87547	8.70568	7.73776	7.54991	9.5448	8.79988	8.12689	8.11527	8.06104	8.13744	8.73973	8.00164	7.39708	8.25779	7.9045	8.5556	7.783	10.3446	9.04654	8.86661	9.57219	8.76494	9.13458	8.18039	8.24539	9.84035	8.7438	7.8464	8.70574	7.76304	8.1682	7.9734	8.99806
LINC01527	8.3191	6.65749	8.03406	7.79364	7.42883	8.21649	9.39595	8.86562	7.8506	7.51551	9.20874	8.89796	11.6265	7.47433	8.20752	7.0852	7.84777	7.70414	9.18271	7.74418	8.31052	7.4329	7.52309	7.62346	7.86491	8.73388	7.2154	7.13934	8.31079	8.0245	7.97853	7.33936	6.85797	7.61553	8.72045	11.2494	7.81725	7.17517	7.115	7.99912	8.20289	9.43947	9.52587	8.0343	7.21315	8.16185	7.03728	7.51105	8.68912
PART1	7.42647	7.5874	8.05057	7.43835	7.11257	8.70748	7.42402	8.78579	8.04674	8.24119	7.26528	6.64359	8.29935	7.35346	6.57813	7.19169	8.53324	7.24128	7.14064	7.29813	9.33557	7.45536	7.51107	10.325	9.76905	10.0914	7.12854	8.28364	6.66399	7.55126	7.71538	8.0562	6.87035	7.34718	7.56999	7.72539	7.84834	7.06476	7.68512	8.52138	7.62855	8.32051	8.39898	7.00466	8.03373	7.71651	7.41266	7.38642	9.50323
LINC01589	8.0551	7.79844	7.65735	8.32984	6.92436	7.63781	9.55441	7.49179	7.551	8.97287	7.10528	6.8375	8.15285	8.26952	6.88916	7.82102	8.3342	6.80975	7.21209	7.65896	8.34291	7.70237	7.68338	8.7987	7.82916	7.94053	8.29099	7.59044	6.7885	8.40604	9.28112	9.65071	7.14034	8.17307	7.30495	7.98108	8.53851	7.67402	8.35887	7.70774	8.63823	7.56046	8.62365	6.94189	7.3523	7.45798	7.65231	8.78625	7.47089
SERTAD4-AS1	7.85541	8.90779	9.49182	8.91099	9.10237	8.51586	7.74181	8.98436	7.75652	10.7493	8.7878	9.26089	8.90239	8.06786	6.97123	7.99347	9.02917	8.45276	7.65153	8.47899	9.2474	9.61486	9.8175	9.65209	8.82528	8.58808	9.12586	7.8934	7.48048	9.65346	9.63102	9.00465	10.3685	10.1596	8.38569	7.69773	9.24641	7.82211	8.15164	8.77098	9.22999	8.81322	9.04808	9.29233	8.54878	9.50849	7.98934	8.82136	8.73613
ZNF667-AS1	7.94689	7.893	10.7277	7.53289	7.31219	8.38077	7.56043	7.8011	8.64493	8.22661	7.49639	6.82196	8.93144	7.57239	7.1657	7.76515	8.70945	7.42216	8.27021	8.24839	8.5581	8.62312	8.37316	8.66925	8.11752	8.28438	8.50428	7.63073	6.98418	8.89678	8.20713	7.88693	8.84602	7.94378	7.88549	7.28918	8.92456	7.38527	7.81688	8.3911	9.23594	8.29261	8.82503	10.1102	9.29107	10.7491	8.90403	8.16124	7.83243
RP11-291B21.2	7.45498	6.9258	7.54093	7.5783	7.40031	7.86008	8.46622	6.64609	7.84589	7.4963	6.98052	7.54189	7.93602	7.94526	6.94382	8.9253	8.66778	8.46832	6.98678	7.70105	10.4182	7.56519	10.0417	8.63713	8.15591	8.04802	7.17835	11.3579	6.69238	7.36827	7.46255	7.2496	7.41139	9.76715	8.04023	6.64357	8.11804	6.98108	7.73196	8.14326	7.29879	8.01207	7.69998	7.12632	10.658	8.18629	8.63683	8.89572	7.68004
THAP9-AS1	10.9023	10.6385	9.65136	11.4563	11.059	10.0158	10.3372	10.0205	9.97091	12.0799	12.1173	12.0539	10.1403	10.2436	11.3224	10.7845	10.8085	10.118	10.4548	9.61771	10.4595	10.5979	11.2686	10.4792	10.2734	9.74287	9.39356	10.6557	10.7092	10.1069	11.3973	10.6605	9.88319	11.4661	10.657	10.9435	10.663	9.66238	10.337	10.3698	9.53106	10.7056	9.89205	11.0188	11.468	10.5366	11.1229	9.94735	10.4937
LOC102724362	9.65783	10.1642	9.92017	8.7206	9.52845	9.45884	10.6148	9.41645	9.66169	10.689	9.85675	9.95387	9.90276	8.69587	9.79695	10.1878	9.78836	9.74457	9.02166	9.63122	10.822	11.0273	8.72479	10.155	10.0367	10.5274	9.45404	9.88687	10.1078	8.90729	10.2523	9.32161	10.7859	10.4662	9.98581	9.55505	9.41381	9.91435	9.56621	10.5701	9.92948	9.92775	10.9921	10.1247	10.7016	9.97396	10.1601	10.0034	9.63632
RP11-532F12.5	9.65783	10.1642	9.92017	8.7206	9.52845	9.45884	10.6148	9.41645	9.66169	10.689	9.85675	9.95387	9.90276	8.69587	9.79695	10.1878	9.78836	9.74457	9.02166	9.63122	10.822	11.0273	8.72479	10.155	10.0367	10.5274	9.45404	9.88687	10.1078	8.90729	10.2523	9.32161	10.7859	10.4662	9.98581	9.55505	9.41381	9.91435	9.56621	10.5701	9.92948	9.92775	10.9921	10.1247	10.7016	9.97396	10.1601	10.0034	9.63632
AC106786.1	7.5592	7.48207	9.11639	7.81126	6.86293	8.04059	7.37875	7.28327	7.28921	8.13205	7.29819	7.97581	8.75221	7.61639	6.68503	7.83195	8.35469	8.66304	7.21532	7.46353	7.70991	8.55294	7.93561	9.48508	8.00892	7.80406	7.98767	7.30566	8.40583	8.27128	7.72248	7.32767	7.57924	9.42083	7.08414	6.77707	8.63167	7.01404	7.91121	8.22549	8.37026	7.61424	9.63711	7.78274	7.30104	7.67539	7.60012	7.83421	7.5377
BAALC-AS1	8.97756	9.11048	7.88566	8.05166	6.80853	8.35781	7.41286	7.94211	8.0174	7.64195	7.65175	6.64935	8.19086	8.20926	6.69254	7.87869	8.51082	6.96926	7.38464	7.63253	7.54429	8.36791	7.96863	7.971	8.93208	8.28296	7.48541	7.66612	6.66384	8.33587	8.03877	8.61725	7.28048	7.81082	6.87771	6.70874	8.85005	7.61538	8.61775	8.33963	8.83002	8.43646	9.37997	7.66028	7.64131	8.58342	8.39648	8.16431	8.21123
GS1-124K5.4	7.95196	9.3742	8.97853	8.73175	8.46245	8.7342	8.99392	9.11682	8.4364	9.26952	9.93844	7.65802	9.00452	8.41055	7.66832	9.07254	8.4702	8.24255	8.13922	8.12559	9.63015	9.86498	9.22725	9.06145	9.6557	10.1755	8.01669	9.36374	9.33654	8.79388	8.44747	9.85333	9.21196	8.03957	8.43978	9.51713	8.82078	8.24241	9.31222	8.83499	9.77044	8.79608	9.98863	8.50534	9.75241	7.84944	8.87652	9.74517	9.42227
LINC01963	7.96523	9.51502	8.38142	8.82969	7.69483	9.23714	7.61621	7.63426	8.80419	8.6628	7.51137	8.59022	10.4577	7.80482	7.50202	8.97869	8.92429	8.70526	8.71598	9.36734	8.39805	9.04948	8.53965	8.41222	8.5135	8.44172	9.11107	8.64714	8.04056	9.13919	8.44606	8.19492	8.7442	8.06354	7.98436	7.27476	9.38001	8.72898	8.61079	8.81126	8.22246	9.14746	9.58712	8.52267	8.05122	9.09549	8.01011	8.31074	8.05218
RPPH1	11.2654	9.28385	8.43228	9.26309	12.1964	10.2253	11.5656	7.7045	8.48495	10.764	8.2465	8.20777	8.6518	9.58189	9.21082	10.2803	8.49847	8.4309	9.19629	9.20163	9.03979	10.2443	9.10654	8.59797	9.03083	10.2444	9.49493	9.16754	8.2476	8.95455	8.5521	9.22739	8.27871	9.13443	9.29455	9.33529	12.7429	7.96268	7.76064	9.38884	8.41943	8.28405	9.0826	8.53741	9.24704	9.84068	9.17308	9.18831	9.75299
RP11-1399P15.1	7.44672	7.57243	7.65234	7.61657	7.32682	8.75189	8.35383	6.79363	9.38036	7.60984	7.44016	7.71578	8.34746	8.55205	6.65075	7.9158	8.41504	7.84904	7.20444	8.01368	8.91484	7.49351	7.70576	7.66927	8.47299	7.98284	7.48275	8.03733	6.55795	8.57024	7.85543	7.78311	8.0092	9.47244	8.32428	7.14766	8.63398	7.50255	7.42886	9.30806	8.06523	8.2561	8.07593	7.42338	8.29433	8.00354	8.14133	8.83397	7.40503
HOTAIRM1	9.44455	9.1475	9.69528	10.2827	8.61947	9.74635	9.78096	11.2229	9.26512	9.65845	11.0386	8.98591	8.79453	9.96091	9.14936	9.38557	10.2012	9.85407	9.75493	8.26856	9.41431	10.5284	9.6078	9.34152	9.96025	9.30567	8.56842	9.76234	9.07361	8.97723	9.16183	11.079	8.65823	9.91715	8.16973	9.53927	10.8915	8.27545	9.04149	9.72712	9.40816	9.31287	10.1417	10.5961	9.7614	10.7788	9.98881	9.86213	9.70699
DLGAP1-AS1	10.557	8.81413	9.39247	8.43681	11.292	8.53819	8.11337	8.451	8.78711	9.51806	8.34014	7.27198	8.30763	8.53339	8.96517	8.17468	9.4709	7.8292	8.10905	8.75463	9.28514	9.71179	9.01753	9.80086	8.91456	9.2263	8.92131	9.39556	10.3012	9.19861	9.50913	9.11139	11.4187	9.08844	9.78381	8.02578	9.53557	8.4369	9.6837	9.70861	9.04306	9.25082	8.61599	8.51092	8.80231	9.43799	8.03869	8.47002	8.95252
AP000695.4	9.02227	7.26158	7.76706	8.65833	7.87958	8.63564	7.71512	7.59405	7.67183	8.61463	7.1	6.50784	7.77226	8.09858	7.19874	8.15498	8.23057	6.96632	8.09714	7.94767	7.50154	9.45539	8.33226	7.71612	7.70016	7.71016	8.00201	7.45113	6.86415	8.9716	7.48909	8.77145	7.47209	8.13497	7.06961	6.88369	9.48803	8.23892	7.19523	7.92897	7.58477	7.83189	8.40257	7.05918	7.46668	8.24625	7.62275	8.37595	7.50565
LOC101929523	8.178	7.91083	9.0191	9.02707	7.32265	8.26393	8.39433	8.10078	7.66554	8.87546	7.94097	6.58081	8.47968	7.93756	7.71319	8.16399	8.44545	7.97819	8.58154	8.28175	9.00218	9.82582	8.60132	8.27108	9.59044	8.81177	8.63171	7.95165	6.82006	8.4602	8.65228	9.22132	7.48868	8.12528	7.48168	7.78485	8.51148	8.02284	8.7817	9.11275	9.02192	9.00052	9.13575	8.04484	7.445	7.60245	8.33949	8.1356	9.33357
XXyac-YX65C7_A.2	8.178	7.91083	9.0191	9.02707	7.32265	8.26393	8.39433	8.10078	7.66554	8.87546	7.94097	6.58081	8.47968	7.93756	7.71319	8.16399	8.44545	7.97819	8.58154	8.28175	9.00218	9.82582	8.60132	8.27108	9.59044	8.81177	8.63171	7.95165	6.82006	8.4602	8.65228	9.22132	7.48868	8.12528	7.48168	7.78485	8.51148	8.02284	8.7817	9.11275	9.02192	9.00052	9.13575	8.04484	7.445	7.60245	8.33949	8.1356	9.33357
RP11-452F19.3	9.92489	10.3082	8.97606	8.88245	9.37401	9.11137	9.5673	8.8606	9.25423	9.96831	9.45472	9.85988	8.9391	8.7557	9.20207	10.0352	8.79979	8.7353	8.18613	8.69128	9.17367	9.3338	8.69822	10.2755	9.41125	10.1456	8.51379	10.549	8.30528	9.43639	9.38108	9.4398	9.37546	9.72131	9.40637	9.09243	9.37626	8.33092	9.17398	10.0946	10.2612	9.83413	9.24372	9.86762	10.241	9.2328	8.40501	10.004	9.25289
KCNMB2-AS1	8.70235	10.0921	9.21414	9.09654	9.8283	8.80431	9.21996	8.81334	8.37709	9.01446	9.04409	7.93654	8.18396	8.86293	8.36686	10.0052	7.73349	8.73116	7.49142	8.36454	9.43527	11.2011	8.8622	9.84564	9.68646	9.64311	7.36252	9.54732	8.78769	9.67271	10.32	9.87362	9.41442	9.5568	9.27586	9.08517	9.22827	8.36267	10.5691	9.67533	10.5499	9.7792	9.56328	8.1386	9.11471	9.30917	10	8.81172	9.26622
FGF14-AS2	7.56376	8.32231	8.78009	8.40687	6.90071	8.02222	7.43373	7.40568	7.97734	7.5828	6.91122	6.91339	7.91325	8.65178	6.6919	7.80906	8.34864	7.31469	7.35646	7.57595	8.51389	7.95436	7.61913	8.47506	8.78729	8.25179	8.38221	8.29205	6.66274	8.68406	8.23192	8.38251	6.98831	7.56919	7.4293	6.89367	7.96172	7.61975	8.35467	8.83143	8.53106	8.7493	8.07809	8.68449	8.82099	8.19798	8.00271	9.00154	7.85371
HOXB-AS1	8.7702	8.82781	8.28663	8.50868	7.78663	8.03294	9.27532	8.93913	7.46799	8.96144	8.22745	7.69092	9.00565	9.75033	7.56228	8.71362	8.45913	7.76183	8.89771	8.89099	8.97156	9.27654	9.5418	8.53033	8.79826	8.37978	9.27974	7.71878	7.86129	8.67438	9.03971	8.99037	7.62491	8.09707	8.51244	7.2487	7.9767	7.37917	9.05042	9.01718	8.519	9.31629	9.46479	8.33562	8.68443	7.64138	7.91255	8.42789	8.82474
LOC100507334	10.4324	6.97144	8.05029	7.29376	7.87208	7.68252	7.39356	6.84368	10.4772	10.2558	7.14093	7.16133	7.7967	9.59749	6.73214	7.59919	7.68443	7.13342	10.5509	10.8858	10.4776	9.40087	7.527	7.54378	7.59231	7.671	7.94208	7.18456	7.4198	7.60287	8.7409	10.0217	6.97973	9.48094	9.6088	9.58351	7.87536	11.3226	7.0284	7.54177	7.28758	9.89712	7.78684	8.50981	8.04863	10.6669	7.14248	7.42595	7.24743
RP11-686D22.8	8.44154	8.56359	9.08198	8.37885	7.40246	7.95179	7.82388	8.03907	8.38905	8.71946	7.97397	7.3089	8.77876	8.19807	7.51392	8.67764	8.80974	8.00607	8.06883	9.03302	8.88491	8.99117	9.25645	8.25423	8.43355	8.89316	8.2123	9.67165	8.18581	8.9967	8.01131	8.0755	8.68553	8.78584	8.70215	7.4269	8.82134	8.11375	9.34678	9.37578	7.92478	9.10309	9.18373	9.20288	9.06814	8.95261	7.9294	8.88285	9.02699
CTA-392E5.1	9.28799	6.70033	7.55877	8.76324	7.29365	11.7021	12.8678	9.48548	8.45622	7.21874	6.91066	7.1947	9.6072	10.501	6.5662	7.3692	7.54632	6.7979	8.13966	7.28233	7.29276	7.42386	8.35826	7.38791	7.43628	7.58133	9.41273	7.14506	6.53071	7.33388	7.30211	7.25137	6.90294	7.6787	7.36077	8.18887	10.6363	6.8941	7.00372	7.38633	7.26236	7.63446	10.5784	6.75054	7.12283	7.66436	7.06814	7.49584	7.36018
CTD-2647L4.4	8.21441	8.92354	8.85197	8.03532	7.13048	8.14291	7.52344	7.53854	8.21509	8.00547	9.13301	6.88059	8.95821	9.227	7.6435	9.27063	9.23934	8.35589	9.01913	9.06625	9.42275	8.13441	8.49915	8.87673	9.10034	9.09764	9.02637	8.43097	8.24982	8.70139	8.37217	8.5802	7.47828	7.74594	7.85599	7.3079	8.57009	7.71619	9.32177	9.42576	8.76059	8.64683	9.1349	9.12498	8.3236	9.52599	8.26421	8.8219	7.49248
LRRC75A-AS1	13.9257	13.0115	12.5474	13.2832	13.57	14.1285	12.2971	12.7616	13.5376	13.1912	13.6762	13.5291	14.2429	13.5386	13.2904	13.3959	13.4225	12.1381	13.5575	14.2066	12.5104	12.1705	13.7083	13.689	13.0795	12.7479	13.2654	14.4489	12.015	13.6178	14.2201	14.0647	12.9335	13.8963	12.4883	12.8876	13.0778	12.6536	12.8258	12.6295	13.94	13.3924	13.5638	12.3561	14.4115	12.6858	13.3987	13.1022	13.9183
LINC01123	9.31044	8.52298	10.7787	9.93166	9.43862	9.03392	9.59188	10.1142	10.127	8.84854	10.3328	8.35336	9.75265	10.2984	10.0246	9.60748	10.9435	9.83418	9.68885	10.7196	9.33249	10.3774	11.6076	10.6248	10.5814	10.8353	9.42926	11.0222	10.3431	10.7119	9.90724	11.3485	10.466	10.5664	10.1419	9.94581	9.35051	9.38732	10.2168	10.5669	10.5797	9.58816	9.67978	9.30489	8.09306	9.30973	9.21403	10.2403	10.0993
AF131217.1	7.41389	7.35453	8.63895	7.25935	7.46004	7.72638	7.45938	7.85271	7.20548	10.5026	8.3543	6.56988	7.83203	8.45286	6.74104	7.05406	7.86166	6.8489	7.66667	7.34575	7.94748	7.36046	7.57681	8.65849	7.85805	8.73998	7.23069	7.94436	7.68333	9.03708	10.7326	9.00488	6.9156	7.4219	7.02128	8.52995	7.70522	7.64125	8.24111	8.49424	7.85424	8.07751	8.47802	6.95006	7.095	7.55417	7.12702	7.43202	7.83382
AC115522.3	9.61465	8.57008	7.90155	8.63873	8.36268	8.38304	9.70394	8.18166	8.60483	7.84672	9.15689	7.49839	12.1502	7.28958	8.05162	8.39353	8.18404	8.07384	9.53079	8.13199	8.64296	9.07246	8.60879	8.05854	8.0802	8.28075	8.33834	7.37508	7.47833	8.29779	7.33755	7.50728	7.83869	10.0457	8.83822	9.22991	8.97831	8.60292	7.34046	8.36561	7.79554	8.64776	10.3001	6.935	7.6399	9.40547	7.82729	7.54986	7.77831
U91328.21	7.40347	8.74329	10.6421	8.42911	8.94611	8.37635	7.91548	8.76316	8.29695	7.56661	9.02907	7.15664	8.45952	8.39548	6.99688	7.89684	8.79583	8.52832	7.94932	9.32878	8.44767	9.04505	8.25635	8.06181	9.30847	9.83635	8.71397	8.52573	7.03485	8.52408	8.95718	8.87295	8.49344	7.89441	7.67824	8.10746	7.99673	8.09193	7.50561	9.41492	9.65715	9.42173	8.92258	9.13308	8.32098	10.5917	8.28007	8.16465	7.1692
ACBD3-AS1	7.71267	7.88191	7.6187	7.6072	7.57451	8.12633	7.37875	8.4336	8.23103	8.61225	7.70565	7.01765	10.1336	8.29293	6.86658	8.76908	10.0281	8.57579	7.01021	7.90802	8.65488	7.54754	7.66805	8.2676	8.66919	8.50229	7.55745	7.94481	9.65872	8.59572	8.07995	8.10153	7.36051	8.1725	8.40997	8.24521	7.83219	8.1235	7.63872	8.64317	7.62903	8.75766	8.56086	7.31457	7.56847	7.98986	7.61544	8.26428	7.23743
POU6F2-AS2	8.47849	8.79648	9.37827	7.63432	7.86503	8.01148	8.29231	6.82181	6.9972	7.18549	7.7465	7.30497	7.92685	7.98964	7.61943	7.82699	7.65221	8.32156	7.15718	8.00991	9.43509	10.5316	7.49318	8.28918	8.65234	9.22197	7.71876	8.01784	8.01661	8.73889	8.44835	9.47832	7.77982	7.31495	7.78962	7.76867	7.6844	9.19827	8.5166	8.54253	9.42487	8.5541	9.10467	7.84511	7.38805	8.21105	8.04149	7.74408	8.45999
TP53TG1	11.1653	11.6269	11.1903	11.8293	12.0226	12.7056	11.0808	11.4863	11.6442	11.7077	10.4599	10.7734	12.1113	10.9016	11.5215	11.4147	12.3083	11.279	10.2328	10.4282	12.557	12.4146	12.6372	11.8814	12.8336	12.0766	10.174	11.61	11.6979	11.2869	11.5943	11.9011	11.7728	11.7756	11.7055	11.8753	11.2838	11.0009	10.8988	11.3036	10.7001	12.5565	12.4119	9.59388	10.981	12.074	12.5745	11.9837	11.9263
CTD-2201E18.3	8.50594	8.58013	10.1045	9.08754	7.40757	9.26413	8.60928	7.59043	9.1899	8.12473	8.4326	7.5262	8.91023	8.41183	7.02188	8.77802	9.56249	8.10103	7.97348	8.41562	8.82469	9.11345	8.77218	8.72184	9.38338	9.34639	8.2723	9.205	8.20649	8.63859	8.98392	9.12453	7.7049	9.0158	7.82905	8.13896	8.7216	8.70906	8.74537	8.98876	9.2163	8.76979	10.0714	9.24028	8.03769	8.63311	8.45465	8.57741	9.17107
LOC648987	8.50594	8.58013	10.1045	9.08754	7.40757	9.26413	8.60928	7.59043	9.1899	8.12473	8.4326	7.5262	8.91023	8.41183	7.02188	8.77802	9.56249	8.10103	7.97348	8.41562	8.82469	9.11345	8.77218	8.72184	9.38338	9.34639	8.2723	9.205	8.20649	8.63859	8.98392	9.12453	7.7049	9.0158	7.82905	8.13896	8.7216	8.70906	8.74537	8.98876	9.2163	8.76979	10.0714	9.24028	8.03769	8.63311	8.45465	8.57741	9.17107
RP5-1085F17.3	8.91067	9.7102	8.2497	10.3963	8.55538	10.5767	8.10818	8.26307	8.75229	9.78952	9.21745	9.57524	9.07147	8.34276	8.76307	8.57362	8.46977	9.07609	8.39538	9.01781	8.46944	9.15347	8.23961	8.18391	8.82387	9.48601	8.98741	8.36773	8.29577	9.65836	9.39848	8.46379	9.98694	8.95935	9.04987	9.43077	9.1164	8.68925	8.77347	9.22203	8.65137	9.29041	9.15878	8.44324	8.44907	9.63922	8.10105	9.11711	10.4056
PITPNA-AS1	11.1862	11.2062	10.9321	11.1862	11.3825	10.9008	10.4314	11.5556	11.2827	10.2431	11.769	10.4925	10.7827	10.9069	10.4965	10.2751	10.3947	10.145	10.8238	10.7217	10.5368	11.2617	11.7697	11.4386	11.5202	11.69	10.96	12.5225	10.4297	10.4761	11.537	10.4434	10.7433	10.9434	10.3057	10.6405	11.5097	9.84432	11.4783	10.5881	11.5373	11.0942	11.3199	10.0855	11.4869	10.5827	11.0414	10.4336	12.1042
LINC00963	9.40112	10.2235	9.85291	10.175	8.62844	9.62863	9.2114	9.60483	9.53673	9.59145	9.66022	8.37149	9.21273	9.41239	8.46341	9.05065	10.0432	9.26618	9.66236	8.93914	10.4206	10.2169	9.04527	10.4715	10.0912	10.6976	10.3721	9.92977	8.83642	10.1942	9.82747	10.0714	8.72728	9.40038	9.22008	8.10511	9.54357	8.48043	10.9614	10.2092	9.47772	10.0714	10.2323	8.59185	9.3122	10.5589	8.90987	10.0729	10.3064
AATBC	8.37353	11.2753	9.76475	7.7812	10.3725	8.26125	8.27487	8.15905	7.49089	8.26554	8.95494	7.7678	9.0056	7.75394	9.11422	8.3605	8.13155	7.86821	7.42188	7.99728	10.1199	9.04965	7.71663	8.64285	10.2722	9.78441	7.48795	7.77336	10.503	7.80397	8.52944	7.50652	9.839	8.25423	8.76011	9.7679	8.48086	8.75677	8.27555	8.63909	8.69046	8.86687	8.48279	8.03287	7.48199	9.92156	9.46567	7.91989	8.77453
RP11-213H15.4	8.65797	6.81743	7.92881	8.44585	7.59898	8.67195	8.62812	8.67978	7.68856	7.77689	7.4511	6.81542	8.45906	9.12579	8.72036	8.1971	9.62643	7.5555	7.77985	8.16474	8.17101	8.35271	8.1944	9.68527	9.04665	8.02262	9.40383	8.40823	7.00883	9.38725	7.50922	9.36065	7.31411	8.19318	8.43999	7.61074	9.07709	7.92442	7.66373	8.71478	7.83634	9.25813	8.4163	7.31686	7.17641	7.78321	7.19624	8.97478	8.82884
RP11-107M16.2	7.40347	6.79876	7.8454	7.28441	8.21269	7.94285	7.37875	6.80279	7.24353	7.20181	8.15118	8.39671	8.34642	7.24422	6.97586	7.19927	7.60703	7.07446	6.94534	7.35377	7.63824	7.4495	7.49318	9.83916	8.65665	8.18811	7.14475	8.39869	8.56341	7.79244	8.28234	8.07888	7.18656	7.36769	8.74391	8.61169	7.74767	7.61766	8.20598	7.59631	7.59215	7.9998	7.62438	7.8704	7.03612	7.43779	7.03728	8.33435	8.21733
AC096579.15	7.90239	6.72175	8.33423	7.43293	7.85209	8.91779	8.51967	7.62332	8.69216	7.67382	9.16697	7.22635	10.2701	7.7542	6.86745	7.56542	8.44948	8.41358	10.3096	8.88783	8.24439	7.63426	8.28935	8.38616	8.29552	8.75848	7.27881	7.55697	8.53327	8.38452	8.38991	7.58866	7.46964	7.91683	7.65546	8.33179	8.31624	8.14416	7.42412	8.5292	8.97965	8.64281	9.10462	7.26052	7.2592	8.36596	7.69354	9.34798	7.89391
RP11-259O2.1	8.33375	9.909	9.40136	8.39219	8.4527	8.56324	8.88744	8.4995	8.05506	8.61181	9.28319	8.25592	8.27973	8.02736	6.91612	8.31991	9.43826	7.64548	8.68802	7.64066	8.5717	8.7826	9.19075	8.6697	8.8928	8.90936	7.86333	8.63384	8.22248	9.04824	9.44726	9.35797	8.61586	7.96014	8.1088	9.04513	9.0334	7.86435	8.91961	8.27566	8.25344	8.42107	10.247	10.5414	8.0776	9.36088	8.37013	9.41752	8.6255
CTD-2587H24.5	9.10401	6.70816	7.41893	10.067	6.72382	8.84335	8.75593	9.14014	8.65867	7.38107	6.92185	6.50784	8.46384	7.785	6.91989	7.82088	9.83515	6.74506	8.62869	8.43148	7.33087	8.15402	10.2639	7.34871	7.43628	7.58133	7.10317	7.13203	6.54284	8.17302	7.27173	7.22317	6.85797	8.11233	7.124	6.60371	9.98235	6.93218	7.04957	7.43164	7.16357	7.90466	7.62438	6.83009	7.03126	7.45441	7.03728	7.51362	7.94609
RP11-720L2.4	7.70529	8.03449	7.68157	7.29798	6.78402	8.17732	7.757	6.70972	8.51454	8.65754	7.26271	6.57427	8.15835	7.97805	6.96094	7.91317	8.0924	7.36507	8.08985	8.6154	8.45087	8.67361	7.92496	7.93546	8.19892	7.97591	8.44713	7.35912	6.61513	9.67542	8.67766	8.1704	7.39186	8.64368	7.41317	6.76653	9.36113	7.15929	8.00844	8.04563	7.62321	8.05955	8.71277	8.10229	8.26927	7.86051	8.14197	8.54887	7.84404
MIR4435-2HG	9.68842	8.77706	9.40566	9.48245	7.74106	9.9468	10.2971	8.50318	9.47877	9.29304	7.98157	7.40393	8.88296	9.30724	8.37386	8.52948	9.40465	8.15463	9.17763	8.82487	8.59233	9.8254	10.0433	9.46106	9.04778	8.45709	9.38594	10.1495	7.26981	10.3419	8.71515	9.95637	8.08948	9.40623	8.82995	7.56296	10.163	8.53214	8.67488	9.02205	8.95366	8.95168	9.12758	8.69598	9.06519	8.34775	8.23159	9.85779	9.10716
RP11-347I19.8	9.24461	10.4545	8.11347	8.35609	7.50193	8.22546	7.9257	7.97603	8.16601	8.38212	8.04538	6.6545	8.79384	8.88732	7.86879	8.4398	9.31219	8.55237	7.52453	7.62016	9.77367	7.96847	7.79763	9.12066	9.83808	8.45725	8.74248	8.54643	8.09693	9.10555	9.70248	8.64505	9.31229	8.1338	8.39548	7.68235	8.08807	6.91739	8.98395	8.60307	9.82239	8.6511	8.02469	9.87169	8.53531	8.97679	7.48364	8.24214	7.96514
BAIAP2-AS1	9.4641	9.72281	10.2415	10.4779	9.61931	9.5382	8.25854	9.07431	9.25808	9.86917	9.31489	8.41533	9.43014	8.62509	9.10815	9.33686	9.3666	9.24492	9.04067	9.87114	10.0171	10.5789	9.29493	9.69149	10.0006	10.3088	9.92592	10.4031	9.68804	9.52433	9.64126	8.78341	10.5628	8.79299	8.91106	9.00012	9.63313	10.068	9.88731	10.2145	10.0652	9.98827	10.3197	10.1184	9.47809	10.7909	10.5057	8.8962	9.81869
CTD-2066L21.3	9.89902	6.65749	8.91481	7.26623	6.72382	8.57911	7.81339	6.76133	7.3989	7.13523	8.26495	6.52596	8.90819	7.43317	6.68015	7.15457	8.04118	7.73082	9.0188	7.33439	8.13816	8.27423	7.54052	7.52211	7.55058	7.62327	7.90563	7.54113	6.86086	8.75933	8.98077	8.30609	7.67968	7.41996	7.08296	8.01667	7.84893	7.49809	7.38454	8.18337	7.37992	8.46101	8.20366	9.1804	7.05893	7.6228	7.03728	7.57977	8.68782
LINC00462	7.62254	6.76373	7.48312	7.25663	9.28931	8.40462	9.13802	7.14283	7.36894	8.16689	6.84898	7.10241	8.27539	7.29077	6.63771	7.05649	7.55689	6.94527	7.7323	7.33561	7.32658	7.48356	7.54134	7.56649	8.43684	9.88818	7.10317	8.41057	6.87673	7.88773	9.5469	7.33874	6.85797	7.72715	7.95425	8.06411	7.87109	7.33496	7.20441	8.13078	7.6149	7.58018	8.07227	6.76984	7.04489	8.16645	7.09014	7.99218	7.99468
CIRBP-AS1	8.75797	8.2426	9.49918	7.98579	8.26381	9.41361	8.49548	7.96054	8.96825	8.69914	8.38914	6.82269	8.3024	7.69861	8.71777	7.18834	8.41391	7.62676	8.27614	7.8906	8.7959	9.61787	7.77738	9.44186	9.04349	10.254	8.73358	10.7251	8.12774	8.73142	9.1824	8.62995	8.08343	7.98518	7.3052	7.63245	8.76591	8.15025	9.21096	8.10678	8.13281	8.53764	8.69798	8.35754	8.44651	7.97475	7.66967	10.0757	7.91931
TPTEP1	7.55952	7.11536	10.0937	8.81846	6.98569	7.82787	7.38372	8.28943	8.65656	7.46002	7.74748	6.955	8.19782	7.13615	6.80473	7.1921	8.38937	8.92268	7.44719	7.51597	7.99782	7.73847	7.6688	8.03329	8.74094	7.79244	7.63909	7.23649	8.10394	8.29049	10.3384	7.41606	7.04176	7.46478	9.36544	9.45258	8.33558	8.71672	7.40689	7.97834	10.4874	8.46896	8.12826	12.1185	8.27456	7.92404	8.44891	7.53698	7.86678
AC090587.4	8.57303	7.83682	8.75496	7.9056	7.71911	8.21074	7.66668	8.07877	8.2642	9.05159	7.96661	6.62705	9.31446	8.52556	7.77643	7.46788	9.19708	8.49252	8.29054	8.24895	10.243	8.88058	8.9297	9.57782	9.19898	9.55905	8.94811	8.8085	8.17571	8.3581	8.83989	8.39298	8.66482	8.31471	7.87697	8.16376	8.6524	7.99631	9.01554	9.79957	9.03357	8.37015	9.28324	8.97239	8.15956	9.74442	8.30496	8.17826	8.59541
BX322557.10	9.15856	8.67241	8.47542	8.44075	7.84949	8.29181	7.51573	8.68482	8.11189	7.89402	7.67541	6.61313	8.51406	9.56038	8.49404	9.49808	8.31181	7.64883	8.15453	8.65192	8.53958	9.29689	8.6422	9.15687	8.99229	9.00038	8.30976	9.35412	7.89851	8.65044	8.22588	8.4105	8.61736	7.8614	7.36977	7.39438	9.35394	8.68008	9.21453	8.58497	8.6878	8.43079	8.77673	8.0813	7.70456	8.97181	7.95335	9.18136	9.42277
RP11-104L21.2	7.97694	7.16119	7.52257	7.35904	6.77836	7.97793	7.56486	6.86904	7.76831	7.46363	6.84898	6.7349	7.95173	7.58708	6.5662	8.24845	7.5454	6.85906	6.94534	7.24654	7.8015	8.64796	7.56891	8.58252	7.7472	8.05042	7.48535	8.69038	6.56701	7.47806	8.29852	8.44352	6.8928	7.44927	7.28772	6.64131	7.7703	6.8437	8.03963	8.19131	8.0042	8.60546	8.59934	6.83659	7.4712	7.47231	8.04593	8.05968	7.25774
KC6	7.93488	10.0418	8.16715	8.08587	6.74621	8.34782	7.99045	6.72473	7.15244	7.71076	7.89562	6.5288	8.32186	7.87474	6.58523	8.31527	7.55251	7.35099	7.09667	7.72159	8.21546	7.97913	7.9268	8.10603	8.47393	8.27717	7.30723	8.22562	6.53071	7.90533	9.42911	7.60363	7.76544	7.55549	6.84835	6.9099	8.03564	7.32218	7.42402	8.24761	7.70931	8.53831	8.38485	8.1592	7.55584	8.51559	8.85212	7.38642	7.97102
SVIL-AS1	10.0903	9.30354	10.4709	9.12085	9.15679	9.58976	10.4002	9.18598	10.2942	9.28042	9.26214	8.39431	10.1461	9.50905	9.88588	10.2983	10.4974	8.86676	9.73822	10.9626	9.75145	11.0135	10.6449	10.5465	9.81389	10.6306	10.3655	10.7141	8.52416	10.0972	10.0332	10.2056	9.3755	9.91876	10.3271	9.60404	10.4875	9.66182	9.55333	10.6928	9.95004	10.0134	10.0586	8.93592	9.91951	10.0017	8.1439	9.3647	10.0778
RP11-134G8.7	8.84535	8.54069	9.88159	8.97018	9.28692	9.06661	8.46479	8.25685	7.91103	8.01015	7.96483	7.90142	8.17729	7.94687	8.0821	9.38182	8.77969	8.33116	7.50399	9.012	9.11928	9.59259	8.58008	9.5654	8.40526	8.23028	8.43498	9.25578	8.50333	8.279	9.89678	9.66329	9.72862	8.91682	7.99542	7.97898	9.07811	7.92671	7.64055	9.16923	10.1444	9.29369	9.58684	9.38542	8.96355	9.4058	8.55822	9.26962	8.49768
RP4-798P15.3	8.88397	8.49525	9.86484	7.84928	8.32562	8.32694	7.61968	7.63568	7.75204	7.57126	7.57119	6.58739	8.19106	7.96453	9.08127	9.13519	8.40932	8.09104	7.41823	8.5145	9.51675	9.54801	7.71081	8.0357	8.10622	8.98595	8.11141	8.31364	7.58185	8.0268	9.17269	8.52147	7.15424	8.08262	7.66176	7.28468	8.61749	8.33785	8.33843	8.82909	9.04652	8.72773	8.18188	8.23728	8.73527	8.12995	8.18622	7.7698	7.46404
APCDD1L-AS1	8.39273	6.80373	7.45989	8.86349	6.75752	7.92885	8.30926	7.63214	8.07352	7.31915	7.81377	6.55999	7.86729	7.80757	6.63786	7.51055	8.65745	7.0515	8.23678	8.15596	7.30222	8.62928	8.20784	7.40325	7.50142	7.65898	9.50338	7.15765	7.69684	8.37798	7.33597	7.47026	7.86504	7.71264	8.52806	7.89675	8.88971	7.12378	7.06249	7.64459	7.27323	7.75881	7.96785	6.84562	7.06143	8.19099	7.2537	7.56942	8.39415
RP11-176N18.2	7.96633	8.27092	8.12444	7.67661	6.83898	8.2299	7.37875	6.64609	6.9972	8.00315	6.90851	6.52909	7.71981	7.25641	6.61673	7.57182	8.10897	6.79749	6.94534	7.29803	7.98428	8.45178	7.5345	7.96032	7.63806	7.65363	7.25785	7.20584	6.70473	7.95161	7.79462	7.43361	6.94235	7.31495	6.83663	6.56669	7.6844	6.91606	7.44561	7.44105	8.39209	8.10094	7.90542	7.62295	7.02632	7.41649	7.80112	7.38642	7.86199
RP1-266L20.2	8.12091	8.85635	9.72268	9.95263	8.92641	8.6597	7.62946	7.98216	9.25723	8.74629	8.51429	7.75657	8.30029	7.85034	7.78034	9.53466	8.90891	8.39047	7.64479	8.38368	8.80647	8.53182	8.65185	9.65848	9.47156	8.302	8.66818	8.9256	8.32961	8.74915	9.41119	9.8299	9.61343	8.88921	8.08078	7.45124	8.59503	9.06467	8.65774	9.2289	9.90413	8.81061	9.14431	9.15519	9.34372	8.52844	9.17233	9.44712	8.49518
LINC00847	10.4891	9.79182	10.466	9.76787	10.2264	10.3214	9.76537	9.3897	10.8041	9.2156	9.27459	9.03753	10.1227	10.2244	8.6737	10.9171	11.0892	9.59921	9.73243	9.82573	10.7364	10.7028	11.4026	10.6571	10.7242	10.6925	10.3186	11.213	9.32821	10.8185	10.4052	10.2496	10.6617	10.9796	10.0909	9.36144	9.69562	9.3445	10.1296	10.3376	10.2802	10.4455	10.999	9.26948	10.1366	10.8363	11.5867	10.4428	9.31642
RP11-490M8.1	9.82317	8.75698	8.16535	9.38202	8.99477	8.90304	9.59342	8.47522	8.46738	8.45124	8.09584	8.30833	9.11896	8.37812	7.52885	8.88071	8.56294	7.29331	8.07222	8.97238	9.11369	9.29999	8.80449	8.82649	8.7157	9.13543	9.10578	8.12289	9.28631	8.29028	9.02442	8.66479	8.93245	8.33282	10.1409	8.07283	9.87471	8.89261	8.33537	9.35064	9.26414	8.3588	8.65805	9.53963	9.94751	9.15895	7.99486	8.26798	8.55821
DOCK9-AS2	9.72858	7.87518	9.17007	8.49466	8.15685	9.32238	9.00937	8.97085	9.87371	7.9942	8.63723	7.83798	9.32648	8.02908	8.46755	7.64357	9.67922	8.63634	9.11411	7.9214	9.01391	9.34689	8.23765	8.82125	9.50346	9.76683	8.44396	8.09385	9.90401	8.55462	9.20003	9.05809	8.01949	9.67962	9.07023	8.96362	9.27579	9.45878	8.66939	9.66395	8.1764	9.36431	9.45336	8.3708	8.68248	8.37427	8.32511	10.1866	8.93572
RP11-114B7.6	8.44087	7.06221	9.15058	7.84769	7.99179	8.25456	9.3625	8.22346	7.40539	7.16292	8.47965	6.55424	8.17074	8.18566	7.67223	7.33543	7.82593	7.27541	7.22801	7.4219	7.69974	8.91985	7.98885	8.89024	9.03798	8.35259	7.75227	7.54203	8.02597	8.00771	8.60752	8.47307	7.73206	7.79554	7.90685	7.84001	9.2067	7.56973	7.53306	8.39666	7.69177	8.42708	9.01796	7.16121	7.14363	7.75711	7.25962	7.93299	8.69398
AC147651.4	8.47273	8.71415	8.03317	8.51509	7.46577	8.50669	7.94354	6.92874	8.84622	8.39672	7.21688	6.96298	8.0861	8.39627	7.33162	8.71706	8.70495	8.05702	7.86371	7.88095	8.83397	8.24084	9.1038	7.97098	8.53897	8.12169	8.6647	8.27542	6.84031	9.14761	8.0092	7.77123	8.67702	8.72843	8.49715	7.75015	9.48203	7.72238	7.55716	8.30717	8.20266	8.16016	8.36886	8.60594	8.34434	8.16338	7.96005	9.78039	7.63831
RP11-73M18.8	10.6101	9.58918	10.4139	11.1083	9.69625	11.3763	12.3943	10.5342	10.548	9.86581	9.94218	10.884	11.129	10.4813	10.0996	9.31378	11.3338	9.53252	10.6386	10.9242	10.6234	10.9513	11.1371	10.2462	10.6866	11.2719	11.4393	9.76991	9.83345	11.218	9.83535	10.3177	10.2249	10.9347	11.1004	10.8018	10.5808	9.43363	10.6638	10.9038	10.17	11.152	11.3392	9.61897	9.06067	10.5615	9.4536	10.2172	11.2391
LINC00504	7.87547	6.6713	7.5118	7.5181	6.76617	8.52738	7.58075	7.0197	7.27378	9.66242	7.11266	6.5359	8.30886	7.78771	6.5662	7.05878	7.67644	7.89643	7.03557	7.35452	7.50027	10.9897	7.79101	8.43309	8.63887	7.67403	7.28803	7.39401	6.53653	7.78452	8.06544	7.22771	6.85797	7.7468	6.84476	6.85979	7.86571	8.36928	7.04381	8.19032	8.61627	8.13403	8.71452	7.62196	7.15801	7.44371	9.54319	8.54219	7.89595
AC005682.5	8.22546	8.05951	8.68888	8.94958	7.95577	9.46127	8.18959	8.5961	8.92696	7.90953	8.55369	7.56558	9.86487	8.58907	7.72076	9.32599	8.92182	7.59166	8.9297	8.78472	7.80573	8.30865	9.09005	8.7912	8.14053	8.64898	9.32249	8.89162	7.17142	8.3113	9.22879	8.98639	7.59652	8.55352	8.82925	8.69834	9.1558	7.92353	8.81656	8.54235	8.24579	8.11168	8.29119	8.32037	8.00665	8.0215	7.28569	9.7491	10.2485
SNHG26	8.22546	8.05951	8.68888	8.94958	7.95577	9.46127	8.18959	8.5961	8.92696	7.90953	8.55369	7.56558	9.86487	8.58907	7.72076	9.32599	8.92182	7.59166	8.9297	8.78472	7.80573	8.30865	9.09005	8.7912	8.14053	8.64898	9.32249	8.89162	7.17142	8.3113	9.22879	8.98639	7.59652	8.55352	8.82925	8.69834	9.1558	7.92353	8.81656	8.54235	8.24579	8.11168	8.29119	8.32037	8.00665	8.0215	7.28569	9.7491	10.2485
LOC100507437	8.11043	7.61038	9.10407	7.94858	7.08193	8.13213	7.37875	7.44034	7.81014	7.49064	7.27215	6.54814	7.79938	7.73974	6.7945	7.77813	7.99485	6.85869	7.84395	8.79892	7.84509	8.45653	8.72002	8.43936	8.63415	8.34519	7.84415	8.38718	6.83713	8.12417	8.20992	8.20462	7.35335	7.58706	7.20759	7.2804	8.55495	7.75066	8.98276	8.61608	8.61751	8.10376	9.61746	7.20064	7.47024	9.20705	8.32302	8.49764	9.21799
RP11-521B24.3	8.11043	7.61038	9.10407	7.94858	7.08193	8.13213	7.37875	7.44034	7.81014	7.49064	7.27215	6.54814	7.79938	7.73974	6.7945	7.77813	7.99485	6.85869	7.84395	8.79892	7.84509	8.45653	8.72002	8.43936	8.63415	8.34519	7.84415	8.38718	6.83713	8.12417	8.20992	8.20462	7.35335	7.58706	7.20759	7.2804	8.55495	7.75066	8.98276	8.61608	8.61751	8.10376	9.61746	7.20064	7.47024	9.20705	8.32302	8.49764	9.21799
RP11-408B11.2	8.60633	10.6113	8.67415	8.22847	8.551	8.26138	7.37875	7.78617	7.14856	8.4816	8.0444	7.18139	8.69642	7.35463	8.28746	9.80294	8.56665	8.58528	6.94534	8.2215	9.02497	9.1912	8.36647	9.73275	9.3518	9.56712	7.29666	9.16239	8.65225	7.93665	8.74732	8.84121	8.47943	7.31495	6.83663	8.01378	8.43855	8.28654	8.76564	8.9124	9.04814	8.70843	8.14435	8.5278	8.68692	8.74177	8.53043	8.39804	8.09401
AC104088.1	8.0474	7.40379	8.03003	7.65489	6.7416	7.73747	7.37875	6.92785	7.44799	7.91636	6.94609	6.50784	7.74556	7.96317	8.23282	8.20931	8.29091	7.58582	7.29332	8.10703	8.06266	8.89359	8.08611	8.79293	8.70705	7.71688	7.14564	8.69058	7.13966	8.19503	8.3126	8.88212	6.85797	7.61583	7.35472	6.84124	9.09837	7.71147	8.37922	7.7523	8.1746	7.69192	8.88803	6.99374	6.99868	7.76892	7.70655	8.45843	7.1692
RP1-102E24.8	8.42527	9.58117	8.23119	8.88187	7.97155	8.15101	8.15738	8.86797	7.97665	8.26852	7.94849	7.10993	8.40056	9.2866	7.11863	7.82984	9.73312	7.94251	7.68496	8.22949	8.28218	7.76461	8.19109	8.28777	8.51079	8.67344	8.47224	8.62239	8.02368	8.61029	9.08986	8.89036	10.3011	8.56409	8.45701	8.38122	8.06918	7.65952	8.67642	7.94524	8.72346	8.39151	7.72679	10.4682	8.20756	7.90956	8.49071	9.16487	10.4522
CTD-3092A11.2	9.38636	9.32851	7.9331	8.50311	7.8945	9.31109	7.90846	8.05601	9.24212	8.7937	8.33466	8.10168	8.38757	9.46925	7.50576	9.57633	9.24172	8.8465	8.27391	8.62684	8.75963	8.6478	8.68282	8.18562	8.98969	8.11461	8.62172	9.09661	8.09657	9.05251	8.92616	8.3137	9.9022	9.03884	8.29482	8.11732	8.22425	7.47905	9.07386	8.36725	8.80161	8.81366	8.90068	7.82793	8.81149	8.59454	9.19101	8.96859	7.96996
LINC02001	9.41644	10.8001	10.4968	9.46003	9.32533	9.42434	9.82465	10.5972	10.4546	10.9042	10.7636	9.71367	9.17721	10.2272	8.97966	10.08	9.3537	9.49262	9.80284	9.22376	10.464	10.9055	10.0873	10.2506	10.3068	11.3242	9.12723	10.8904	10.3922	10.0535	10.1675	10.9723	10.1364	10.623	10.4192	10.3127	10.4508	9.21581	10.0569	10.5159	10.6132	10.1858	10.3714	10.5698	11.4529	9.54274	10.4158	12.3264	10.5602
RP11-510J16.5	7.5704	8.72524	7.94282	7.98961	9.3339	8.47284	7.78411	8.2921	8.09498	7.33781	7.17364	6.67196	8.20644	7.60626	6.79662	8.87132	8.28067	7.27016	7.50394	7.27647	7.51673	9.32854	7.95884	9.255	8.30944	8.59128	7.52055	7.57802	7.76825	8.44707	8.42173	8.99185	6.95879	7.86074	7.16329	7.02799	8.25429	7.09255	7.16565	8.02409	8.30991	8.36857	8.23675	7.56858	8.57776	7.73885	8.63119	8.94546	7.36192
EPB41L4A-AS1	10.5607	9.46266	9.90545	9.98005	10.8288	10.758	10.0882	10.0145	10.8211	10.9998	10.9914	11.3953	10.8493	10.8967	8.82385	10.9274	10.8107	9.47756	9.6056	10.3139	10.4924	9.93083	10.9387	10.4072	10.4576	9.56939	10.6556	11.2539	9.24802	10.4714	10.2849	10.2175	10.2322	11.2398	10.5997	10.1588	10.1565	9.00672	10.1439	9.89537	10.9459	10.4806	10.7221	9.39581	10.5228	10.0588	10.8068	10.8885	10.0532
RP11-98I9.4	8.67136	9.20385	8.07291	8.92537	8.53946	8.34831	7.40507	8.52441	9.245	9.10338	8.85586	7.12429	8.49866	7.99776	7.35553	8.50525	9.21414	8.39491	7.44751	8.09393	9.45535	9.37367	8.29578	8.39489	8.49314	9.65201	9.04935	7.62942	7.52095	9.21601	8.88317	9.87051	8.48058	8.9593	8.87687	8.02842	8.34143	8.43996	8.29931	9.05987	9.63882	8.62779	8.6363	9.2412	7.56328	7.92875	8.82161	8.72343	8.72787
TRAM2-AS1	9.20719	9.28819	9.55206	8.13121	8.49407	8.87501	7.73176	7.72028	8.34987	7.97067	8.40894	7.50192	8.50848	8.47275	8.25907	8.42551	8.46971	8.20093	7.90762	9.2884	9.09369	10.3315	8.43032	8.95663	9.15679	8.82209	8.44745	9.02533	7.903	8.77229	9.01828	8.62357	8.38611	7.97558	7.73928	7.5022	9.079	8.79897	8.9077	8.76326	9.3113	8.45053	9.72627	9.01578	10.154	9.96728	9.62947	8.84687	8.65782
RP11-304M2.3	8.19644	6.89459	8.04755	8.62919	8.51575	8.12587	7.81615	7.31835	8.37535	7.3968	7.97906	7.45255	7.66289	8.17901	6.91857	7.91523	8.83877	9.21413	7.75925	7.71302	8.54144	7.60227	7.73152	9.073	9.36368	7.77932	7.21045	9.06812	8.31248	8.66956	9.073	9.28671	8.36579	8.59037	8.36967	7.15607	7.77726	6.90223	9.05403	7.75763	7.33236	7.85033	8.21413	8.06082	7.63719	7.59726	8.42455	7.45362	8.03326
RP11-295G20.2	11.6227	9.71627	10.4734	8.99297	12.0837	9.92261	12.1736	9.22187	8.83055	10.5159	10.2946	10.2254	10.8196	9.31114	9.76832	9.82646	10.6415	9.782	9.23883	11.0332	10.3425	10.7879	9.69095	9.78998	10.744	11.2441	9.74606	10.1467	10.0378	9.02073	9.62553	8.7638	9.74259	10.1302	9.45734	10.3908	9.63578	10.2888	8.99846	9.7139	9.04019	10.8036	12.0453	10.4689	9.99414	9.82532	8.75307	9.95549	10.5278
LINC01503	10.9726	10.703	10.3314	11.0233	10.2734	11.0778	10.4252	9.51686	9.36439	10.4584	9.89692	9.59307	10.9505	10.0969	10.607	9.9337	10.3836	9.60594	9.50066	10.7255	10.5727	10.8553	9.83593	10.1071	10.5473	10.159	10.0851	10.7836	10.225	9.30231	9.6748	9.91572	10.0009	10.9847	10.8619	10.4242	9.9252	9.89637	11.2678	10.7702	10.2201	10.0957	10.0217	9.67229	10.0852	10.338	9.35907	11.0812	10.5532
RP11-20I23.13	8.37469	8.14133	8.88023	8.32264	8.31821	10.1078	8.5155	8.31234	8.85537	8.07231	7.85308	8.23526	8.11933	7.77604	7.47185	8.74313	9.03303	8.05432	8.34582	8.47568	9.35396	8.02427	8.42362	8.68255	8.93435	8.26401	8.42881	8.66332	7.79121	9.15097	9.4636	8.85654	8.92448	7.95786	7.79546	8.68794	8.77139	8.15064	9.08104	8.41713	8.57954	8.66184	8.43296	8.22923	7.93675	9.84321	9.16458	9.31474	9.76583
TRIM52-AS1	9.64723	8.87387	9.05204	9.27314	8.58818	9.29433	9.39539	8.70215	9.80128	9.12385	8.95787	9.55806	9.11091	10.0133	7.71553	9.93498	9.84079	8.52574	8.80124	9.07292	9.78512	10.1822	10.5834	9.87992	8.82379	9.2291	9.42591	8.79734	8.6402	9.94766	9.03835	8.99464	9.62121	10.1809	9.35602	8.39356	9.82828	8.48175	8.58523	9.45141	8.60961	9.85517	10.147	8.94013	10.2711	9.99144	9.33877	9.4736	9.26312
RP11-284N8.3	7.44853	7.4884	7.76799	7.37905	7.00932	8.47978	7.42134	6.84806	9.84827	7.39292	7.05865	6.60108	8.33592	7.51563	6.71981	7.76647	8.05395	8.03148	7.56278	7.84962	8.8567	7.43021	7.79557	7.87659	8.76419	8.60408	7.41751	8.10289	6.58923	7.82553	7.59485	7.35344	7.83288	7.62399	7.45988	6.68025	8.16303	7.59625	7.51592	8.74632	8.94561	9.25632	8.90522	7.02501	7.81489	8.86819	7.76504	8.72193	7.62778
CTBP1-AS2	8.86335	8.99212	9.66344	8.75766	8.57144	9.80935	7.89926	9.00233	9.37564	8.83809	9.1577	7.29595	9.49213	8.34338	8.53462	8.4722	9.39883	8.92194	8.85455	9.39959	9.30934	9.35198	9.0865	9.58393	9.42511	9.13658	9.66275	9.27672	8.5938	9.02197	8.93103	8.57116	8.42119	8.7177	8.53798	8.55699	9.1765	9.73885	9.21717	9.38531	9.22628	9.00096	10.3071	8.45588	9.59213	10.037	9.42961	9.28935	9.65755
SLC25A25-AS1	8.78824	9.54335	7.78473	7.84529	7.79789	8.11887	8.17833	8.10804	8.26512	8.73068	7.52427	7.21734	8.21577	8.88132	8.23568	8.26743	9.33404	8.65567	7.7867	8.55141	8.90921	8.02758	7.78539	8.87203	9.31611	8.11424	8.15177	8.73961	7.99526	8.95187	9.62277	9.5874	8.56752	8.21603	7.78335	7.81141	7.75	7.21508	8.81245	8.25978	9.11602	8.53851	8.19197	9.16003	7.97385	8.21326	8.12435	9.20887	8.42675
SNHG6	11.478	12.4388	12.2117	13.088	12.8048	13.8535	12.5303	11.9397	12.8338	13.5187	13.9232	14.0006	12.7933	13.1011	12.2306	13.3266	12.1462	12.367	12.0675	12.2692	12.0008	12.5115	13.7707	12.7743	13.0369	11.7265	12.7303	13.5353	11.9849	12.4103	12.9563	12.4443	12.6021	13.4989	13.0566	12.5886	12.276	11.6309	12.0475	12.4521	12.1864	12.8304	12.9244	12.627	14.5401	12.9519	13.3709	12.2777	12.447
LINC01694	7.40347	6.90075	11.0353	8.51479	9.25426	7.7745	7.37875	6.7552	7.29637	7.26302	6.96541	6.83624	8.42486	7.26588	10.0485	7.45593	7.55064	8.8246	7.06941	10.2138	8.36415	7.35122	7.88054	7.70694	7.94713	7.67672	8.32014	7.25901	7.78458	7.50273	7.44929	7.51864	8.56117	7.36457	8.34662	8.41483	7.74781	8.92923	7.27059	7.73509	7.23954	7.52852	7.73927	10.0506	7.25886	9.61897	8.56333	7.69341	7.78056
DLGAP1-AS2	10.274	7.80604	8.01824	7.64554	10.1601	7.97531	7.81218	7.45048	8.40629	9.25093	8.06129	7.31796	7.92751	9.33594	9.05311	7.56737	7.93366	7.47452	7.58102	7.5048	8.49884	7.9791	7.87665	8.8466	8.57924	8.34255	8.00932	8.70891	8.23113	9.45294	8.78638	9.58549	10.3849	8.55945	8.69994	7.68122	9.40394	7.77053	9.53426	8.83464	8.95854	8.49644	8.0389	7.7713	7.74015	8.51014	7.2624	8.02183	8.68055
RP5-991G20.1	8.81332	7.94448	8.8961	8.15413	7.83171	7.93058	7.64607	7.99151	8.39353	7.66948	8.52826	7.06715	8.44635	8.76249	7.96638	9.04116	8.26436	8.068	7.90823	8.49362	7.78041	8.60417	8.62046	8.67998	8.24676	7.82363	8.5859	7.89404	8.20937	9.05313	8.4537	8.91221	7.12374	8.58024	7.52567	7.5962	8.61381	7.58457	7.56026	8.94021	8.75301	8.24639	8.50585	7.97491	8.64397	8.27824	8.05411	9.01793	8.92959
CTD-2184D3.3	8.13231	6.99766	7.82133	8.80426	7.18142	8.85988	9.31094	7.56443	7.39432	8.19956	7.61572	7.2132	8.47135	8.41243	7.90569	7.08022	8.39231	7.65308	7.0924	8.56041	8.04063	8.34452	7.71709	7.87657	7.71911	7.99854	7.76454	7.3428	8.62411	7.6969	7.70549	7.31076	7.16345	7.78029	9.09243	9.00917	8.8246	7.97301	7.84117	7.74115	7.34995	7.79469	8.55768	7.79984	7.03091	7.63676	7.06733	7.68116	8.60693
GAS5	12.3357	11.605	11.4094	12.5469	12.0789	12.8807	11.7539	11.7466	11.9114	12.3557	12.5394	13.2058	12.1888	12.4415	12.7591	12.6649	11.7773	11.6848	11.0479	11.3284	12.0303	11.6507	12.2718	12.0198	11.443	10.6062	11.5792	12.8031	11.498	11.8651	13.1573	12.3748	11.8253	12.874	11.9409	12.015	11.1378	10.6472	11.473	10.9486	11.2825	11.5601	11.697	11.2728	12.0037	10.9259	12.3099	12.671	11.8128
CTB-39G8.3	8.64842	8.88496	7.91465	7.68548	7.70528	8.52728	7.68565	8.13627	8.37997	7.71815	8.99218	6.55738	8.48619	9.08	7.43018	8.25482	8.93916	8.81806	8.32191	8.77146	8.91136	8.11231	7.49318	8.28825	8.91604	8.7897	7.66931	7.87055	10.3264	8.81506	9.56347	8.46857	8.65786	8.29749	8.68574	8.79911	7.85212	7.08235	7.70456	8.12176	8.3161	8.03346	7.72979	8.32678	7.18744	8.16165	8.09932	8.10355	8.26264
AC093110.3	8.22579	9.43158	7.74206	9.46902	7.18066	8.31338	7.50045	8.29293	7.93869	7.82455	8.15612	6.50784	8.81431	9.00457	7.82892	8.25533	9.19095	8.94236	8.4802	8.34239	8.23826	7.58499	8.12659	8.58282	9.10455	8.56678	8.93807	7.866	8.9304	8.36377	8.969	9.80687	8.43698	7.41629	7.51661	6.90131	8.5864	7.30427	9.03484	8.8944	9.07187	8.47967	9.06737	8.65212	8.03983	8.62892	7.94836	8.371	7.64196
RP11-473I1.5	10.3431	9.55773	11.3232	9.64894	10.111	9.77603	9.00427	10.0401	10.4681	10.6731	9.91459	8.75097	11.268	10.9254	9.93289	10.0733	11.1875	10.3909	11.1723	12.2716	10.904	9.301	9.64292	10.5132	10.5142	11.0764	10.3937	10.2686	9.68845	10.4631	10.1163	10.7476	9.89309	9.65572	8.87617	8.37018	10.4675	9.80126	10.8314	10.4917	9.86433	10.8514	10.8645	10.5373	9.20764	11.2919	10.039	9.98362	9.13216
RP11-589P10.7	7.40347	7.24989	7.41893	7.2537	6.79776	8.02527	7.37875	7.02595	7.92709	8.16994	7.38162	7.02278	8.18287	7.86372	6.76382	8.07456	7.83529	7.26441	8.01147	8.47038	8.60521	8.90235	7.87549	7.55198	8.16001	8.74215	7.62717	7.36906	6.75483	7.70657	7.6898	7.56406	7.9897	7.31495	7.59946	6.56669	9.01051	7.67002	7.18608	8.21117	7.84499	7.23459	7.89193	7.22205	8.76577	8.14587	8.90039	8.41191	7.38579
AC007128.1	7.85276	9.04951	8.4961	8.03888	7.1141	8.33126	7.39936	6.73581	7.07255	7.66153	7.11754	6.50784	9.01958	7.67668	6.5662	8.52931	7.68466	8.17229	6.95011	7.91566	8.05795	9.74234	7.58751	7.72314	8.6129	8.49165	7.49629	8.47461	6.53071	8.30212	8.50455	8.16082	6.89126	7.37732	7.14678	8.02803	9.21025	7.98292	8.24354	8.13275	9.1561	8.41078	8.32164	8.44731	7.78809	7.67881	8.55693	8.3954	7.65758
LIPE-AS1	10.4578	9.6389	10.3419	9.66423	8.85599	9.05662	10.0806	9.45061	9.30343	9.96801	9.54713	7.80128	9.6864	9.72035	9.65925	9.99756	10.1053	8.94368	9.61029	9.3266	10.1605	9.79641	9.97487	10.4711	9.85009	10.918	9.35053	10.2768	8.63496	10.2256	10.1509	10.3196	9.34229	9.55648	8.88555	8.54459	10.1794	9.19394	10.4692	10.3372	9.62015	10.1476	10.3718	9.45653	10.0417	9.95368	9.28844	10.1753	9.12419
LOC101930071	10.4578	9.6389	10.3419	9.66423	8.85599	9.05662	10.0806	9.45061	9.30343	9.96801	9.54713	7.80128	9.6864	9.72035	9.65925	9.99756	10.1053	8.94368	9.61029	9.3266	10.1605	9.79641	9.97487	10.4711	9.85009	10.918	9.35053	10.2768	8.63496	10.2256	10.1509	10.3196	9.34229	9.55648	8.88555	8.54459	10.1794	9.19394	10.4692	10.3372	9.62015	10.1476	10.3718	9.45653	10.0417	9.95368	9.28844	10.1753	9.12419
ERICH6-AS1	8.86842	8.82879	8.59739	8.12342	7.42519	8.45508	7.89757	8.27779	9.033	7.59014	7.59523	6.65469	8.24165	8.55406	7.79132	9.11461	8.41109	7.62119	7.5704	8.25073	8.12945	8.41385	7.71604	8.5517	8.32209	8.28322	7.6271	8.35991	7.69346	9.05364	8.34243	8.51474	7.71711	8.37498	7.37176	7.36494	8.85434	7.85208	7.86132	8.53169	9.68154	8.19651	8.55279	7.46567	7.77477	8.14528	8.06961	8.23527	8.50534
RP4-758J18.7	8.23026	8.06056	9.79694	8.22203	8.86049	8.14891	8.08832	7.90351	8.53633	7.52476	7.62483	6.93801	8.00973	8.21895	8.63867	8.54651	8.34342	8.6027	7.74405	7.5212	8.51269	8.79785	8.09021	9.26964	9.78316	8.66335	7.51073	8.53246	8.80874	8.19758	8.54829	9.06402	8.17929	7.75905	8.16956	8.16587	8.68272	8.69091	8.55188	9.15678	9.01378	8.53585	9.18348	9.34342	8.68849	8.80948	8.1031	9.28343	7.66521
RP11-47A8.5	8.06769	7.79966	8.44563	8.53412	8.13103	8.82413	7.71546	8.49807	8.68225	9.05717	7.81063	7.03418	8.48262	8.32587	7.16948	8.84857	9.13716	8.04628	8.44253	8.04947	8.88566	9.07261	9.01437	8.83195	8.76458	8.19009	9.02712	9.05743	8.24807	8.71508	9.2842	8.31698	8.81592	8.41973	8.03202	7.72517	9.00489	8.59527	8.38826	9.00319	8.53611	9.0296	9.02158	8.36976	9.3238	9.89198	9.81332	8.54745	8.19037
AC005083.1	8.19294	6.84466	8.75656	7.49259	9.23827	8.19323	7.37875	8.61269	9.22552	7.25945	8.49163	7.82436	8.35277	7.65631	8.47966	7.86135	8.52158	8.3503	7.67604	7.74572	8.27955	9.11673	7.79841	8.11781	8.61943	8.86052	7.46471	8.40357	9.64651	7.85546	8.31262	8.68113	8.8543	7.80944	8.87556	8.76548	7.9712	9.85302	7.49342	8.50913	8.02536	8.41345	8.60621	7.40651	8.50173	8.44323	7.58517	8.26959	7.69385
LOC100506098	8.19294	6.84466	8.75656	7.49259	9.23827	8.19323	7.37875	8.61269	9.22552	7.25945	8.49163	7.82436	8.35277	7.65631	8.47966	7.86135	8.52158	8.3503	7.67604	7.74572	8.27955	9.11673	7.79841	8.11781	8.61943	8.86052	7.46471	8.40357	9.64651	7.85546	8.31262	8.68113	8.8543	7.80944	8.87556	8.76548	7.9712	9.85302	7.49342	8.50913	8.02536	8.41345	8.60621	7.40651	8.50173	8.44323	7.58517	8.26959	7.69385
PRKAG2-AS1	7.69138	7.23064	7.99219	7.44184	7.37957	8.1814	7.68591	7.97388	8.51902	8.04124	7.27962	6.70553	8.00537	7.56702	7.01976	7.8641	8.31183	7.31857	7.09222	7.64641	8.35281	8.7025	7.6213	10.3248	9.15262	7.71183	7.67859	8.7627	6.73997	7.8059	8.77776	7.96632	7.27685	8.61665	7.53166	7.3949	7.82056	7.08016	8.01576	7.92258	8.30981	7.96299	7.84592	7.51595	8.17273	7.76054	9.58101	9.20779	7.67318
RP11-145A3.1	7.82273	7.32664	8.50984	9.5527	6.74567	10.12	9.00091	8.89021	7.11725	7.5	7.09509	6.58296	7.94022	8.08222	6.71048	7.60343	7.6787	6.89086	7.58867	7.36728	7.44456	8.43051	8.36858	7.83577	7.51046	7.82792	7.57821	7.21439	6.5878	8.06241	7.34625	8.00517	6.92043	7.58702	7.15474	7.65992	9.01637	7.44775	7.37648	7.73953	7.34294	8.0925	10.2999	7.08213	7.41534	7.50776	7.21239	8.21584	9.68028
RP11-815I9.4	9.20718	9.52316	9.83221	9.85068	8.642	9.24225	8.16179	8.64763	9.97738	10.9186	9.85281	8.00232	10.5319	9.51756	9.6019	10.2889	10.2955	9.79396	9.67559	10.1063	10.8202	9.98973	11.2598	10.3029	10.283	11.2342	10.0276	10.1571	9.44872	10.1757	10.5568	10.484	9.31339	9.57185	8.92298	8.79526	10.029	9.55982	10.2924	10.5495	10.5631	10.094	10.5551	9.65633	10.0798	9.98236	10.162	9.97195	9.49074
TRBV11-2	7.40347	7.67	7.87884	7.3697	7.18008	8.27824	8.15762	7.32234	9.77346	7.50356	6.93035	6.50784	8.59737	7.6887	6.5662	8.09769	8.13751	7.47721	7.19143	7.52836	8.37711	7.70103	8.09438	7.7293	8.13805	7.941	8.02136	7.69997	6.60172	8.28985	7.86527	7.25126	7.76121	8.44765	7.64053	6.56669	8.21253	7.28121	7.55107	8.12841	7.75887	8.07509	8.40284	6.92302	8.3904	7.85552	8.66862	8.35673	7.7677
RP11-426C22.4	8.05231	8.30037	7.69022	8.30547	6.95829	8.27484	7.61161	7.22585	7.5429	9.19448	7.65271	6.68164	8.13999	9.24277	7.1447	8.07808	8.11724	7.13049	8.43932	8.68177	7.84151	8.80653	8.48888	8.19923	8.07562	7.9172	8.84283	7.39663	7.16138	10.8214	8.30716	8.83111	7.85749	8.48731	7.72858	6.78592	9.55443	7.11462	8.25173	8.07606	7.63262	8.18465	8.34249	8.41682	7.37732	7.78258	7.76776	9.01068	7.71977
HOXB-AS4	8.785	6.6923	7.41893	9.07266	6.72382	8.2286	7.75523	6.78401	8.20428	7.88034	7.12237	7.66512	7.71085	8.33053	6.5662	8.12723	7.83386	6.74506	7.40166	7.41431	7.26616	7.38108	7.49318	8.37637	7.48968	7.62226	9.206	7.13203	6.53071	7.94202	7.97296	8.22562	6.85797	8.0993	8.0284	7.96146	8.13837	6.8437	7.08929	8.31827	7.7793	7.99143	7.62438	7.76184	8.96237	7.32333	7.06207	8.47685	7.24963
RP11-875O11.3	7.45631	7.32167	9.35661	7.77717	8.54177	8.751	7.37875	7.05842	8.21496	7.86622	7.91271	6.95659	8.20095	7.45285	7.98494	8.67838	7.62828	8.26584	7.81902	8.37383	7.99082	9.32877	7.51967	7.51315	7.62206	7.91654	8.16845	7.73351	7.83614	7.66273	7.51656	7.31567	7.80277	8.00579	9.16701	7.97818	8.88599	7.55876	7.59976	8.87282	7.24518	8.40923	8.47988	7.2099	7.6035	9.74238	7.63	8.44902	7.75134
PRRT3-AS1	7.75884	8.11398	10.2535	8.78791	7.93706	8.54821	9.79433	8.0048	8.25462	7.80318	8.88976	8.48747	9.39643	8.53034	7.58238	7.96459	8.61972	8.34894	8.53543	9.92718	8.18901	8.63353	8.58527	9.66116	8.95851	8.40145	8.97399	8.60216	8.69746	8.27105	8.82045	8.50933	8.24777	7.77292	9.14161	9.27722	9.43254	8.68849	8.56645	9.62721	9.52	8.50352	8.60075	8.52466	9.92203	8.09398	8.28875	9.4643	9.05491
CTC-321K16.1	7.57137	7.7077	8.90834	8.12664	8.28923	8.60155	7.64163	7.1148	7.18021	7.15627	8.16579	6.94277	8.47728	7.23115	6.5662	7.37508	8.64603	7.24402	7.22636	8.95756	8.8228	7.43398	7.49318	7.45937	8.16788	8.37991	7.37295	7.38764	7.99195	7.71957	7.69924	8.86588	9.35203	7.58748	8.36383	8.43134	7.98048	7.76501	7.24977	7.48317	7.53122	8.01015	8.91321	8.08044	7.07348	9.78005	7.30363	7.38642	8.38127
RP4-669L17.10	9.29533	9.29296	8.9948	8.92575	9.30465	9.31971	8.69282	8.5397	8.46502	8.87059	8.50312	8.88243	8.76223	10.5148	8.04748	9.61723	9.4875	10.0394	8.2936	8.96451	9.99685	8.52146	8.45859	10.0586	9.97014	8.42642	9.0109	10.5188	8.82689	9.45917	10.0836	10.2149	9.19924	9.11458	9.08436	8.57282	8.22394	7.64267	9.90015	8.59129	9.17536	9.34418	8.66216	9.55209	8.44177	8.91861	9.03786	9.29185	8.72627
LINC01315	7.84822	8.75372	8.02807	8.35986	7.93074	8.21244	7.84741	7.97866	8.49447	10.2703	7.1126	10.5236	8.34487	7.64673	6.9169	11.3015	8.4294	6.952	7.48059	7.41118	8.39379	8.76873	8.04547	8.53093	8.14936	8.62939	7.74776	8.07509	6.7361	7.99193	7.78033	7.6864	9.00979	8.71977	7.32948	6.98708	8.24218	7.25603	7.70682	8.46623	7.97578	8.20182	8.42105	7.10703	10.337	11.2547	8.84168	9.47143	8.48722
SERPINB9P1	7.55931	7.02073	8.15002	8.38455	6.90638	8.64839	7.48825	7.45467	9.53922	8.06241	7.32706	6.57047	8.89706	7.42007	7.01994	8.48985	8.07043	7.72355	7.84092	7.57134	9.12616	7.606	8.53396	7.93633	8.01313	7.92736	9.01067	7.84733	7.48531	7.78124	7.8993	7.48317	7.15944	8.35467	7.82119	6.70152	8.97845	7.52379	7.51109	8.71874	7.70786	8.25732	8.86598	7.20552	7.71809	7.71037	8.96237	8.74112	7.47635
RP11-488L18.10	9.17069	8.64245	8.20263	9.04135	8.27739	9.45197	8.35718	8.97557	9.75719	8.94082	8.28035	9.79426	8.28338	8.34501	8.32668	9.97237	8.62702	8.55858	7.8398	8.05672	10.0082	9.09321	8.54816	8.788	8.96867	8.58171	8.24925	9.43269	8.83179	9.26775	9.44901	10.2001	9.96763	10.1812	9.17672	9.26951	8.13537	8.06593	8.78085	9.26458	9.11592	9.77422	9.20515	9.5632	8.99934	8.93953	9.2691	9.1065	8.63865
LINC02159	8.24139	7.33157	8.94404	7.71696	6.96501	8.00575	7.94037	7.58516	7.07358	7.1772	7.27821	6.52379	9.00208	7.34597	6.5863	7.2601	8.49039	7.21455	7.75566	7.44195	8.37199	7.88907	7.7776	8.66252	9.38485	9.88757	7.86183	7.483	7.0011	7.40974	7.52263	7.2331	6.85797	7.69951	8.39141	8.05319	8.21563	7.13804	7.13729	7.55429	7.70286	8.27552	11.1579	6.75054	7.87869	8.60547	7.94968	7.61633	7.50742
RP11-339B21.10	7.40347	7.56172	9.00698	9.90185	7.97276	9.78029	8.99692	7.83032	7.93126	7.93443	8.30103	8.04554	8.04594	8.04795	8.55679	7.28567	8.01392	7.73324	7.81861	7.59604	7.63616	9.73345	8.87145	8.34815	7.9746	7.87593	8.65322	7.55626	7.21989	8.16033	7.72472	7.55557	7.58647	7.68138	8.92835	7.37278	8.91201	7.94607	7.79604	8.22564	7.41893	8.0527	9.70321	7.10344	8.18651	7.84601	7.3235	7.88338	7.35909
AF131215.2	8.00417	8.91237	7.922	7.79482	7.89155	8.15595	7.77395	7.54356	8.68455	7.45604	7.01551	6.50784	8.06269	8.18294	7.82436	8.23778	8.52877	8.5597	7.2595	7.52769	8.9911	7.88983	7.6323	9.42794	8.2389	9.44428	7.26633	8.25963	7.77403	8.60313	7.64412	7.32159	7.24257	7.95655	7.41655	6.65247	8.09111	7.34635	7.46453	8.34243	8.86597	8.37383	8.6504	8.45182	7.97123	7.81007	7.52051	8.33966	7.27906
RP5-1198O20.4	8.65831	7.82265	9.10061	8.86093	8.60384	9.32169	8.06883	8.58047	8.89953	8.13893	8.27905	8.22021	10.7076	8.18466	7.20005	8.44778	9.81448	7.82813	8.56094	9.32067	8.34656	8.27346	8.53101	8.62685	8.66723	9.93133	7.6668	8.99111	7.55702	9.20163	8.77101	8.88832	8.41028	9.02198	7.9163	7.66261	8.90075	8.27468	7.94995	9.03983	8.24961	8.45792	9.33089	8.34484	8.05746	9.18573	7.73955	7.97331	8.26011
RP11-111M22.3	8.80627	9.51596	10.4462	9.17777	9.33626	9.22456	8.57695	10.2044	9.67221	9.50989	9.16992	8.83354	9.42966	9.61677	8.57024	9.63386	9.24096	8.13305	9.00475	8.40228	9.41126	9.0132	9.45227	10.1904	9.66324	9.96572	9.24456	9.84123	9.93445	9.01538	10.5929	9.32266	9.79092	8.75923	9.16186	9.87705	9.40226	8.73034	9.03207	11.5832	10.5017	9.64788	9.35518	10.239	10.3703	9.90248	8.91609	9.90021	9.33048
RP11-304L19.3	8.11929	8.27638	7.69346	8.21376	7.56744	8.25566	8.28733	7.72901	7.24261	7.85434	10.284	10.0761	7.80459	8.23227	10.8958	8.24567	8.74951	9.61884	8.32126	7.5064	9.20539	8.54836	7.57014	8.53715	9.88777	7.80734	8.03227	7.55569	10.3094	7.62287	8.28119	8.56239	8.53932	8.34367	8.06718	10.0043	7.82739	8.23232	7.96911	7.94501	7.83827	8.87312	8.31221	8.80462	7.40793	8.18114	7.6403	7.90928	8.93048
NORAD	13.13	13.6214	13.3436	14.1007	12.9671	13.7056	11.207	13.2279	12.9886	12.7793	13.9221	12.3442	13.5845	13.1212	12.6128	13.2862	13.9985	13.8061	12.9838	13.604	13.4643	14.2045	13.7768	13.6139	13.7714	14.0271	13.7819	13.9969	13.7591	13.559	14.0391	13.9518	13.0843	13.1482	13.279	12.7955	14.0041	13.9446	14.3387	13.7277	13.8794	13.8566	14.1971	13.1415	13.4056	12.8656	13.8275	13.2168	12.7739
CTC-246B18.8	7.87023	7.18804	7.70296	8.31361	7.07052	7.90955	7.37875	6.64609	7.26999	8.34292	7.30308	6.62399	7.68809	7.94877	6.59766	7.5427	8.07989	6.96489	6.99197	8.96118	8.05571	7.97194	7.71709	8.6332	9.44258	8.28706	7.7219	8.35971	7.09124	8.32876	8.16544	7.38449	7.54622	7.58517	7.69094	6.75344	8.31751	7.39689	8.3491	8.71505	8.19452	8.02761	8.65903	7.52872	8.04259	8.21475	8.94278	8.04399	8.04329
LINC01816	7.53286	7.08614	8.78928	8.34225	7.14628	8.2055	9.15873	7.47641	7.66564	8.50886	7.65195	6.64209	8.14586	7.41571	6.60129	7.47072	7.90797	7.48964	7.57282	8.23095	7.70521	8.14653	8.53632	8.18839	8.42525	8.69731	7.98279	7.65582	7.69751	8.00929	8.57165	8.25478	7.65823	7.85873	7.41282	7.55557	8.32496	7.53196	8.41325	8.46425	8.88397	8.23794	8.00346	8.55811	8.39222	7.80252	7.82603	8.06533	10.544
PRKCQ-AS1	7.75424	6.8622	9.31955	8.40869	8.66066	9.6982	8.86456	7.93507	8.68808	7.31612	8.19184	7.67334	8.16145	7.89727	6.61912	7.77784	9.09592	7.45604	7.90844	9.52784	8.6295	7.79161	8.85078	8.15839	7.65223	8.3619	8.18758	7.84735	8.26132	7.81666	7.40396	7.47576	7.12972	8.53353	9.40963	8.0652	9.18772	8.31945	7.40815	8.63353	7.91941	7.80415	8.15078	8.47148	8.49372	8.53598	8.3889	7.84727	7.36625
RP11-1103G16.1	8.89646	8.20484	8.96369	8.20045	8.03214	8.56765	9.11134	6.71902	8.08056	7.77815	7.48236	7.38878	8.56835	8.5308	6.5662	8.05095	7.49635	7.67838	8.08945	8.42129	8.29632	8.3125	8.19971	8.98492	8.8683	9.55577	8.10587	8.27076	8.22564	8.25451	7.96892	8.70508	7.83812	7.31495	6.96189	8.65359	7.6844	7.92744	8.7465	8.65821	9.13071	8.21448	8.3038	7.93612	7.20724	8.09794	9.0541	8.05042	9.14542
GAS6-AS2	8.64846	7.02344	7.89018	9.09329	7.71411	8.0151	7.4971	7.73987	7.35557	7.23412	7.57588	7.77918	8.25707	7.50028	7.49274	9.10203	8.5562	7.19495	8.70243	7.89736	8.64484	8.82453	8.4532	8.18975	8.38723	7.68429	9.1646	7.96413	7.43097	7.91772	7.64193	8.1939	7.95849	7.72165	7.50544	7.60764	9.38054	7.20139	7.27096	7.62262	7.94415	8.66064	7.96039	7.48653	8.8806	8.00252	7.26959	8.8956	7.66761
RP11-497E19.1	8.22609	6.68858	7.41893	7.77051	6.76805	8.5509	7.9362	8.40924	8.3008	7.12255	6.9373	6.50784	7.81939	7.51962	6.5662	7.20564	8.02496	6.8825	7.93531	7.32304	7.24231	8.39471	8.29926	7.43238	7.65127	7.58133	8.38669	7.13203	6.53071	8.20897	7.38825	7.32914	6.85797	7.62029	7.30603	7.00783	8.91645	6.89826	7.25643	7.78408	7.36893	7.84943	7.62438	7.04192	7.20272	7.45127	7.03728	7.4906	8.4482
MMP25-AS1	8.67775	9.48918	9.58492	9.65616	8.20485	8.59198	8.17297	8.80632	8.59121	8.57546	7.63796	6.83062	8.76739	9.93697	7.56531	9.40634	9.02603	8.86708	7.97387	9.42028	10.2942	8.39451	8.08592	9.27657	9.79203	9.06451	8.4812	9.49781	7.69174	8.84317	9.05115	8.99515	9.28592	8.24629	7.97959	8.03837	8.71941	8.9955	9.63459	9.20871	9.05501	9.28542	8.63272	9.41661	8.75478	9.55339	8.98876	9.35452	8.77789
RP11-283I3.6	8.5333	8.92006	8.96723	9.18141	8.2318	9.13658	7.63288	8.31262	9.26368	10.0907	8.82443	8.21988	9.03084	8.08796	8.38111	8.32531	9.45216	8.95505	8.26558	9.01065	9.64013	9.55116	9.62252	9.24211	9.36861	9.40422	8.89467	9.4713	8.54979	9.48222	9.21027	9.33732	8.2116	9.25637	8.73399	7.99839	8.69514	8.92805	8.94135	9.33486	9.43228	9.14264	8.83011	9.68198	9.17501	9.43596	10.1183	10.1741	9.54643
RP3-522D1.1	7.91722	6.90077	7.61946	10.083	7.34587	9.41714	9.45997	8.38409	8.17381	7.93515	6.84898	7.19072	7.84537	8.52169	6.60571	7.57223	7.91188	7.00948	8.70416	8.36929	7.37794	7.89808	10.1725	7.40272	7.53221	7.61639	9.50628	7.80365	7.05294	7.46302	7.5519	7.29372	7.22347	7.80772	7.12426	9.53075	8.33024	7.20052	7.20128	8.0018	7.98639	7.82278	7.95612	6.93927	8.20116	7.40636	7.63999	7.93184	8.17502
RP11-389C8.2	7.87059	8.08424	8.81075	7.7514	7.1792	8.86061	7.72201	7.38518	8.83119	8.48625	7.61549	6.98787	9.0041	7.93221	7.59875	8.80634	8.7344	8.07322	8.75539	9.26129	8.97755	8.50802	8.89588	8.76487	8.71208	9.03352	8.4209	8.51825	7.29492	9.23444	8.62662	7.96163	8.09008	8.41003	8.08314	7.54603	8.8264	7.86043	7.94439	8.86043	8.74112	8.89173	9.18931	7.50183	8.08194	8.53686	8.33135	8.41247	7.80615
LOC105374366	7.40347	8.21703	8.94517	7.94721	8.56043	9.18097	8.71042	10.4175	8.59593	9.6276	10.0004	8.98988	8.59639	8.16366	7.70651	8.45623	8.38443	8.47715	9.34316	8.34227	9.02931	8.85909	9.68072	8.53648	9.70895	8.55603	8.56723	8.40571	9.32714	9.11618	8.91025	9.12336	8.8533	8.62915	8.06041	8.6037	9.13042	9.61132	8.69082	9.3254	7.97347	8.53042	9.3127	8.9787	9.07573	9.1402	8.85222	8.08521	9.40975
RP11-539L10.3	7.40347	8.21703	8.94517	7.94721	8.56043	9.18097	8.71042	10.4175	8.59593	9.6276	10.0004	8.98988	8.59639	8.16366	7.70651	8.45623	8.38443	8.47715	9.34316	8.34227	9.02931	8.85909	9.68072	8.53648	9.70895	8.55603	8.56723	8.40571	9.32714	9.11618	8.91025	9.12336	8.8533	8.62915	8.06041	8.6037	9.13042	9.61132	8.69082	9.3254	7.97347	8.53042	9.3127	8.9787	9.07573	9.1402	8.85222	8.08521	9.40975
SNHG8	12.3183	11.2758	11.5473	12.7947	11.3945	13.0542	12.2166	12.1198	13.003	13.0855	12.2353	12.5541	12.7154	12.3976	11.3366	12.6242	12.3054	11.4629	12.1997	12.0698	11.9552	11.8011	12.4298	11.6374	11.6366	10.9893	12.2865	13.4279	11.688	11.6161	12.5206	12.0092	11.3482	12.9592	12.1008	12.3245	11.9041	10.7152	11.4865	11.5174	11.6611	12.2169	12.4789	10.7975	13.0779	12.09	12.291	12.1328	11.9014
AC010731.2	7.40347	8.74792	7.578	7.37074	6.86501	7.6964	7.37875	6.74879	7.03436	8.00081	6.84898	6.52798	7.93937	7.51159	6.5662	8.56558	7.74446	6.82251	7.01338	7.24654	8.50617	7.39639	7.49318	9.41308	8.573	7.87646	7.17735	8.61337	6.70719	7.86166	8.53637	8.29027	8.03157	7.31495	6.83663	6.64255	7.69087	6.91872	7.67899	8.1723	7.42266	7.77351	7.87014	7.80291	7.23672	8.48166	7.03728	7.43174	7.23075
RP11-471B22.2	8.48455	8.20038	7.5218	8.56259	7.19842	8.29739	8.42566	8.12618	7.32607	7.52732	7.57083	6.50784	8.34555	8.60244	7.33975	8.17134	9.09488	7.7157	7.69785	7.8925	8.43559	7.68033	7.7458	7.78351	8.50537	7.73554	8.10962	7.75117	7.24436	8.66198	8.02757	8.2624	7.87079	7.8593	7.27724	7.34438	8.31669	7.30213	9.00227	8.30689	8.00773	8.35866	8.17951	7.76068	7.33492	7.62273	7.40869	8.14941	8.04008
RP13-270P17.3	11.0924	8.09494	9.15418	8.23433	10.4447	8.45381	8.48678	8.69281	9.26959	8.69578	9.33074	8.71132	8.88227	8.73282	9.24518	9.57874	8.52844	8.50412	8.99909	8.4435	8.94147	9.3443	8.64631	8.74516	9.31011	8.88094	8.94581	8.16402	10.5158	8.44658	8.20465	8.8013	12.0909	9.01785	8.62448	8.72172	9.63807	9.61684	9.11449	9.43718	9.10159	9.37636	9.35694	9.44651	9.70744	9.82813	8.42691	8.48071	9.42958
DTX2P1-UPK3BP1-PMS2P11	8.28986	10.1412	8.82576	9.22488	9.72405	9.1729	8.75145	9.39373	9.1784	10.3188	8.41467	8.56848	9.13523	9.34859	8.56096	9.55325	10.7899	9.84066	9.23981	9.3697	10.7977	9.2116	9.41283	9.81935	10.5366	9.74772	8.91914	10.069	10.0876	9.77344	9.96674	9.69125	10.4836	10.1887	9.07264	8.91072	8.3157	9.20622	9.46192	8.95236	9.24609	9.59655	9.27967	9.5672	10.3155	9.44873	11.4229	10.7229	9.21242
DUBR	8.39001	8.65583	7.67588	8.33967	7.3038	8.24733	7.42799	7.70608	7.54973	7.57742	7.02948	6.61452	8.7855	8.46635	7.08973	7.74534	8.69566	7.13779	7.94399	8.51591	7.98472	8.9697	9.23067	8.35108	8.2834	7.89603	7.83764	8.53338	7.00009	8.38975	8.17087	7.60204	7.03785	8.14421	7.34097	7.33546	8.79581	7.10021	8.43908	8.70832	8.00523	8.61944	8.6186	7.508	7.9629	7.67683	8.43468	8.20353	7.87569
CALML3-AS1	9.32959	7.91385	9.17776	8.70303	8.68621	8.64032	8.17893	7.85384	8.74452	8.94491	7.76063	7.04715	9.63437	8.16273	8.2452	8.55273	9.5991	8.25766	7.4392	9.58441	8.84941	8.95983	7.59115	8.88953	8.64284	8.9051	9.47772	8.19863	8.47675	8.29435	8.86176	9.6612	9.31358	9.02039	9.17913	7.89639	8.58518	8.87776	8.79402	8.69573	7.92642	9.3032	8.3382	7.41021	8.2685	8.35779	8.04505	8.55242	8.74422
RP11-799B12.4	8.55144	8.00725	8.43253	8.309	7.82355	7.73582	7.37875	7.35732	7.1004	7.54082	7.01038	6.93759	7.80271	8.41894	6.96577	8.6172	7.78078	6.92137	6.94534	7.85712	8.31684	7.44485	8.17321	8.79312	9.09534	8.33999	7.8492	9.28013	7.35431	7.86928	8.01515	8.66054	8.77173	7.51386	7.03059	7.23254	8.12373	7.43431	8.53802	7.48552	8.14337	7.59715	8.07564	8.4332	7.59833	8.05544	7.69345	7.48825	7.90668
ZFAS1	14.8153	13.0262	13.5069	15.1662	14.4475	15.1736	14.4051	13.8689	14.0699	14.368	15.4766	15.4952	14.4938	14.5834	14.5446	14.1716	13.7491	13.4958	14.6521	14.3952	12.9918	13.8572	15.2121	14.3417	14.2516	12.9567	13.856	15.219	13.3149	13.9251	14.3295	13.8131	13.7353	14.4494	14.2615	14.3929	14.106	13.9144	13.0882	14.0721	13.8866	14.0137	15.0062	13.7714	14.8109	13.1985	15.2257	14.6148	14.3932
LINC00969	9.03885	10.7079	8.77267	9.32346	8.71033	9.07002	9.13053	9.31397	8.30356	8.26593	8.7988	8.40286	8.71197	9.83035	8.63041	8.63418	9.66693	9.84149	8.38352	8.92148	9.40862	9.09057	8.70099	9.60092	9.80268	8.6143	8.87305	9.75087	9.68107	9.66011	10.0822	9.91228	9.50994	8.83664	9.2292	8.92683	9.95523	9.83642	10.0569	9.6092	9.10715	8.67889	9.04527	9.66734	9.2972	8.67015	9.45793	9.38721	9.22037
SDHAP2	9.03885	10.7079	8.77267	9.32346	8.71033	9.07002	9.13053	9.31397	8.30356	8.26593	8.7988	8.40286	8.71197	9.83035	8.63041	8.63418	9.66693	9.84149	8.38352	8.92148	9.40862	9.09057	8.70099	9.60092	9.80268	8.6143	8.87305	9.75087	9.68107	9.66011	10.0822	9.91228	9.50994	8.83664	9.2292	8.92683	9.95523	9.83642	10.0569	9.6092	9.10715	8.67889	9.04527	9.66734	9.2972	8.67015	9.45793	9.38721	9.22037
RP11-373D23.3	8.78903	7.27414	7.5915	8.57905	7.2776	9.132	7.8401	7.35339	7.29508	8.77345	7.49528	7.30806	9.52455	7.67645	7.3347	7.28148	7.91299	7.14783	7.93116	8.06358	7.66021	8.10978	7.93208	8.1404	8.38175	8.51715	8.15023	7.75574	7.66948	8.57765	9.20286	7.81882	7.88239	8.16037	7.36833	7.18089	8.53932	7.70504	7.39477	8.2276	7.8458	8.8352	9.2549	8.35321	7.78528	7.77547	7.68081	8.35408	8.47333
RP3-406A7.7	9.57988	9.76181	8.78039	9.79644	8.83395	10.5207	9.55646	8.29076	8.96798	11.2671	9.2657	10.9478	9.90695	8.59337	8.56717	9.95369	9.48684	9.24211	9.17035	9.07078	9.12458	9.13555	8.5584	8.80461	9.31121	9.21331	9.37156	8.56497	8.2603	9.24568	9.85757	9.14577	9.21197	9.20608	8.28163	9.41985	8.19389	8.96932	9.45748	8.99637	8.42916	9.6343	10.1671	8.3033	9.41274	9.28349	8.06506	9.42956	9.94378
LOC100049716	9.11424	9.59806	9.97887	9.25642	8.89826	8.78526	8.03403	9.7097	8.97796	7.93371	8.08383	7.109	8.87028	8.0812	7.17526	8.40794	11.0602	8.77083	8.50584	8.66149	8.72558	9.76819	8.42208	8.4109	8.54001	8.81932	8.72818	9.1774	8.51228	8.36795	9.29371	9.03001	8.58838	9.47893	8.80172	7.94221	8.95393	7.51542	8.59398	9.55213	9.25047	9.38998	9.06073	10.786	8.83902	9.44016	10.5891	11.3348	9.78898
RP11-218M22.1	9.11424	9.59806	9.97887	9.25642	8.89826	8.78526	8.03403	9.7097	8.97796	7.93371	8.08383	7.109	8.87028	8.0812	7.17526	8.40794	11.0602	8.77083	8.50584	8.66149	8.72558	9.76819	8.42208	8.4109	8.54001	8.81932	8.72818	9.1774	8.51228	8.36795	9.29371	9.03001	8.58838	9.47893	8.80172	7.94221	8.95393	7.51542	8.59398	9.55213	9.25047	9.38998	9.06073	10.786	8.83902	9.44016	10.5891	11.3348	9.78898
TMPO-AS1	10.7006	10.2915	10.6902	8.97698	8.80091	9.28355	8.13956	8.8142	9.51946	9.64687	9.04826	8.81737	9.1482	9.40247	8.3615	10.0227	9.5836	9.75588	8.9912	9.26766	9.26721	10.4334	9.60234	10.0416	11.3742	9.64445	10.2425	10.9325	9.19036	9.57867	9.65427	9.51024	9.46419	9.72931	9.14402	8.85597	9.67446	9.98852	9.50417	10.4705	10.888	9.61466	10.3531	10.5048	11.1782	11.3448	9.613	9.90075	9.83146
OIP5-AS1	11.7689	11.687	11.3275	10.6019	9.80145	10.7828	9.91324	9.9579	10.9773	11.7133	10.9887	10.3093	11.8709	10.7804	10.855	11.605	11.4943	11.2191	11.3613	12.057	11.942	11.6568	10.8342	11.7629	11.2651	11.5337	11.2792	11.4153	10.8833	11.2353	12.2594	10.7757	11.444	11.2785	10.3234	10.0214	11.16	11.4126	11.4811	11.9348	11.8661	11.3706	11.9013	11.7088	11.2505	11.2993	10.9843	11.4521	10.9969
IL20RB-AS1	8.14429	8.21992	7.48795	7.49502	8.30648	8.32679	7.5196	8.26706	7.3407	8.38901	8.42534	6.541	8.76063	8.01257	8.29845	7.51737	8.54686	7.0758	8.85173	8.77424	8.68528	7.99772	8.16635	7.58665	8.23045	8.06307	8.1199	7.45586	7.99068	7.68577	7.8403	7.74624	7.45561	8.11203	6.91816	8.19277	8.19312	7.14408	7.98401	7.47778	7.65968	7.39262	8.22136	6.75054	7.09712	8.66401	7.28138	7.84607	7.80654
RP5-1047A19.4	9.27794	7.94203	9.27187	8.66401	7.42471	8.10427	7.7495	7.9933	8.78648	8.28271	8.77962	6.83611	9.88111	8.83692	8.58051	8.29188	9.7172	8.80966	8.75343	10.5554	9.01075	8.70022	9.87027	9.08723	9.5462	8.98328	8.1714	9.67003	8.4546	9.17175	9.30518	8.66427	7.88492	7.89809	7.73863	7.41823	9.03751	8.67387	9.29136	9.42836	9.14502	8.45469	9.49764	8.49791	8.83008	8.82819	9.70045	8.39514	8.41452
RP5-1021I20.1	9.15349	7.99493	8.56708	8.06589	7.32959	8.20039	8.16283	8.11722	8.3285	7.8852	7.1202	6.78139	9.51164	8.79244	8.76337	8.60782	8.14367	8.38205	7.6353	8.61589	9.76006	8.34021	8.74091	8.96611	8.78866	9.87266	7.62723	8.57589	7.45561	8.23077	8.15632	8.994	7.08719	9.24538	7.38232	7.37934	9.42813	7.50914	9.62495	8.49073	9.71669	8.29533	8.99536	7.92328	8.37431	8.21457	8.55904	9.89763	8.25227
RP1-80N2.2	8.04457	7.44967	8.69984	7.97393	7.20388	9.915	9.6744	8.46676	7.45821	7.47315	8.76591	9.46615	7.96029	7.80417	6.61703	7.59589	8.3061	7.52695	7.81021	8.20433	7.5629	7.99843	8.01106	7.71463	8.22894	7.81762	7.30251	7.22278	7.02639	7.57842	7.67283	7.62293	6.85797	8.18563	7.54355	8.04866	8.04243	7.76339	7.22406	8.29972	7.82845	8.3195	8.12813	9.11993	7.20615	7.43441	7.91136	7.73692	8.39445
LINC01089	9.26073	10.6642	8.31593	8.57851	7.70745	8.60685	8.56956	8.18356	8.77939	8.21156	8.42504	7.44343	8.70864	8.7711	7.78953	8.44896	9.18564	8.65512	7.66204	7.84227	9.87873	8.2789	7.96499	9.28283	10.1047	9.10507	8.714	8.69594	8.16926	9.26016	9.708	8.83514	9.69762	8.50939	8.91021	8.33732	8.30451	7.29426	9.15045	9.0156	9.66987	9.35668	8.4266	9.8021	8.80953	9.09842	8.3421	8.42097	8.56837
RP11-742B18.1	8.0124	8.36516	7.8915	7.74703	8.45714	8.81193	8.68297	6.64609	7.31817	8.11283	7.8551	7.61442	8.56982	7.85099	8.6922	8.0022	7.50592	7.58266	7.31869	7.64552	7.88612	8.55817	8.33301	8.98261	7.94189	8.58554	7.37078	8.90163	6.54656	7.991	8.80069	8.16957	7.71358	8.00539	7.79156	8.39786	7.71671	7.75058	7.43258	8.26989	8.18363	8.22781	8.73642	7.38646	8.46475	8.20216	8.22207	7.94595	8.04861
KMT2E-AS1	8.69533	9.53916	9.89334	10.7135	9.23092	9.30541	10.7163	10.0642	9.6406	9.75583	10.4261	9.12526	9.4795	9.31169	8.40693	9.81598	9.99672	9.61244	8.69571	8.8448	10.2083	9.05439	9.07912	9.50042	10.3406	9.58452	9.07884	8.83462	10.8779	9.14723	9.79068	10.5716	9.57814	11.1986	9.61616	9.69386	9.37891	8.60452	9.32759	9.28274	8.87785	10.0492	9.63255	8.82108	10.2175	9.53824	8.72139	10.2398	10.3497
LINC00511	9.91156	10.3444	10.6672	10.1421	9.81911	10.7874	10.4612	9.34239	9.74664	11.1466	9.18395	9.27629	9.88204	9.64848	8.82256	10.9927	10.3363	10.0618	9.23644	10.2013	9.53872	10.5963	9.70504	10.1697	9.83279	10.0403	9.00532	10.7123	10.3499	9.82925	9.63169	11.0896	9.47477	10.6653	9.81957	10.0846	9.50839	10.3481	9.82833	10.0347	10.7746	9.54552	10.2002	9.65245	10.3895	10.1081	10.9331	10.2306	9.72077
RP11-517P14.2	7.7657	7.90858	8.73287	8.31911	7.2129	8.1209	7.37875	7.75845	8.34583	8.26432	7.67724	6.8487	8.65842	7.86297	7.34077	8.04469	8.5238	7.62216	8.21785	8.55438	8.29929	8.91281	8.83311	8.84822	8.79073	8.18326	8.45118	8.82766	8.0188	8.37165	8.75588	8.16954	7.68411	8.30154	7.3354	6.96767	9.06971	8.23856	8.14633	9.08906	9.29693	8.79114	8.87214	8.3134	8.69874	8.2559	8.4005	7.88477	7.71519
OSER1-AS1	9.41065	8.8242	8.19031	9.28164	7.84723	9.40206	8.26572	8.19898	8.91961	8.20372	8.32033	7.3248	8.5921	8.09243	8.00862	9.38827	8.6803	8.07834	8.04979	8.20557	8.68145	9.49263	9.0771	9.21214	9.08404	8.76503	8.91895	8.95767	8.67643	8.82501	8.76784	8.84042	8.63671	8.38315	8.02321	7.94229	9.48678	8.23415	7.71665	8.48996	9.46701	8.77496	9.65132	8.21633	9.50512	8.50383	9.85613	9.34526	8.28263
RP11-755F10.1	9.37364	9.18505	9.63191	10.2567	8.0936	10.1085	7.58993	7.98834	9.68598	9.08529	9.08008	6.7083	9.49193	9.18818	9.35519	9.30039	9.31049	9.64366	9.66888	9.03617	9.29264	9.3901	9.56293	9.2217	8.95882	8.63778	9.33272	8.49908	8.29937	9.97709	9.0547	9.64103	8.44981	9.73485	8.12801	7.79755	10.0829	9.65162	8.55234	8.99274	9.14571	9.40244	9.58991	8.57162	10.1818	8.70155	9.35117	9.08956	8.66627
RP11-83M16.6	7.79835	7.95853	7.49541	7.36202	7.19796	7.93852	7.41487	7.54469	7.10498	8.41112	7.78445	6.76517	8.15632	8.27902	6.5662	8.46109	8.68086	7.35222	7.54055	8.19797	7.70771	8.7758	8.84216	8.6981	8.23446	9.15115	7.33974	8.37482	7.07897	8.42434	8.54323	8.46258	6.85797	7.96379	7.64037	7.0723	8.04372	7.88051	7.7979	8.376	8.9452	8.60008	8.99819	8.03966	7.59729	8.14742	8.27224	7.39499	7.77987
DLEU2	9.98688	8.23622	7.91952	9.00382	7.61136	10.0184	7.89328	7.57413	8.16188	8.52484	8.4045	8.17294	8.03476	8.06886	7.99044	9.46862	8.18552	8.12646	7.62324	7.66143	7.8387	8.75002	8.39022	8.70708	8.23497	8.3497	8.1757	8.13649	7.24267	9.58392	8.74752	9.50909	8.74255	9.01891	8.22388	8.79495	8.83396	7.75822	8.59127	10.1435	8.58304	8.9855	8.5433	9.68182	7.97645	8.16499	7.93814	8.10832	8.27367
MIR15A	9.98688	8.23622	7.91952	9.00382	7.61136	10.0184	7.89328	7.57413	8.16188	8.52484	8.4045	8.17294	8.03476	8.06886	7.99044	9.46862	8.18552	8.12646	7.62324	7.66143	7.8387	8.75002	8.39022	8.70708	8.23497	8.3497	8.1757	8.13649	7.24267	9.58392	8.74752	9.50909	8.74255	9.01891	8.22388	8.79495	8.83396	7.75822	8.59127	10.1435	8.58304	8.9855	8.5433	9.68182	7.97645	8.16499	7.93814	8.10832	8.27367
CTC-497E21.3	7.98214	7.77915	9.13406	9.45582	7.00207	8.13238	7.37875	7.77992	7.34153	7.44562	7.66494	6.70563	8.35348	8.0509	7.76125	8.35287	9.41548	7.67517	8.1556	8.03857	8.08071	9.36863	7.89249	8.61611	8.16683	8.0765	7.78508	7.27132	7.5956	7.86986	8.19909	9.21513	9.30648	8.65529	8.52281	7.99618	8.15172	8.72781	8.15391	8.62529	8.3239	8.20365	9.22327	7.45501	7.63316	8.34897	8.0196	8.6899	8.0184
LOC105376557	7.98214	7.77915	9.13406	9.45582	7.00207	8.13238	7.37875	7.77992	7.34153	7.44562	7.66494	6.70563	8.35348	8.0509	7.76125	8.35287	9.41548	7.67517	8.1556	8.03857	8.08071	9.36863	7.89249	8.61611	8.16683	8.0765	7.78508	7.27132	7.5956	7.86986	8.19909	9.21513	9.30648	8.65529	8.52281	7.99618	8.15172	8.72781	8.15391	8.62529	8.3239	8.20365	9.22327	7.45501	7.63316	8.34897	8.0196	8.6899	8.0184
LOC100129484	8.2409	8.11394	8.86864	8.47454	8.53552	8.73427	7.72041	8.57794	7.86497	7.92977	7.92375	6.98307	8.91578	7.58971	7.08327	7.40219	9.12142	8.45052	7.85813	7.86615	8.68109	9.19754	8.06311	8.43083	8.85661	8.65426	8.45721	8.16297	9.02361	7.84383	8.16247	7.97904	9.06799	8.06539	8.35627	7.60041	8.52424	9.08956	8.6237	9.22237	8.62504	7.9872	8.53156	9.51032	8.99024	9.29847	8.17803	8.69071	8.04474
RP11-1275H24.1	8.2409	8.11394	8.86864	8.47454	8.53552	8.73427	7.72041	8.57794	7.86497	7.92977	7.92375	6.98307	8.91578	7.58971	7.08327	7.40219	9.12142	8.45052	7.85813	7.86615	8.68109	9.19754	8.06311	8.43083	8.85661	8.65426	8.45721	8.16297	9.02361	7.84383	8.16247	7.97904	9.06799	8.06539	8.35627	7.60041	8.52424	9.08956	8.6237	9.22237	8.62504	7.9872	8.53156	9.51032	8.99024	9.29847	8.17803	8.69071	8.04474
RP11-59D5__B.2	8.09907	6.75918	7.64537	7.73685	7.08244	7.6647	7.37875	7.0031	7.18894	7.2089	6.87228	7.99824	7.93785	7.85428	6.71945	7.06206	7.82601	6.84472	7.9614	7.55544	8.87007	7.40572	7.84147	8.83606	7.88181	7.59559	7.98156	8.30391	6.59072	7.85905	7.52319	9.1385	6.85797	7.46845	8.23582	7.08691	8.40508	6.92728	8.72254	8.01731	7.16357	7.4967	7.66998	7.48059	7.01924	7.37418	10.5551	7.41402	7.72087
CTC-325H20.4	9.57813	9.02103	8.73496	9.90909	8.39138	10.1392	9.60031	8.78228	9.06237	8.99671	8.69421	8.91671	9.3566	8.60073	9.02449	8.74979	8.52483	8.67971	8.60143	9.16409	8.6125	8.94637	8.91448	8.94483	9.02829	9.85155	9.06108	8.06535	9.07878	9.70073	8.75961	8.82462	8.23606	8.3945	9.39171	8.0277	9.37408	7.57834	8.34966	9.45102	9.43714	9.13017	9.1909	8.98257	8.68816	9.25968	7.57706	8.87894	8.52805
RP11-1020M18.10	7.47963	6.72474	7.48195	8.84767	7.77334	7.63781	7.85671	8.31498	7.10678	7.13752	7.1532	6.50784	7.66289	7.09373	6.5662	8.71634	7.62072	6.79052	8.11857	7.58678	7.24231	7.95049	7.49318	8.46823	7.43628	7.6512	8.3047	7.22781	6.74563	7.33388	7.83435	8.93475	8.68603	8.4657	7.32496	8.30338	7.77558	8.06449	7.18989	7.43721	7.16357	7.23459	9.09519	6.75054	6.99868	7.8717	7.03728	7.45164	7.26128
LINC00324	9.44235	8.8059	9.08418	8.38458	8.03362	9.51367	7.92353	7.88311	8.84403	8.17575	8.19347	7.09404	8.94128	8.57348	7.77612	8.54109	8.5902	9.13596	8.07891	8.35045	9.25405	8.63266	8.5109	8.91749	9.63155	9.37654	8.29931	9.92113	7.6617	8.73336	8.90064	8.98734	8.00569	8.71665	7.91016	8.39931	9.19182	8.28245	8.77931	8.46596	8.65378	8.51106	9.17561	7.437	8.90554	9.03121	9.57677	8.45754	8.62664
HOXD-AS2	7.51113	7.83838	7.62971	8.08254	6.77622	8.16056	8.10574	7.16185	7.69873	7.89954	6.84898	7.52964	8.66009	7.58352	6.66689	8.61526	7.83809	7.46244	7.41642	7.42986	7.72942	8.92322	8.13722	7.80926	8.94941	8.72438	7.63385	7.50859	6.56557	8.12281	8.86141	8.35331	7.42091	8.7976	7.0559	6.63042	8.74397	8.0335	9.464	7.54535	9.40242	8.21891	7.86751	7.38614	7.30345	7.54357	8.57457	7.79155	7.24706
LOC101928837	7.6537	7.98064	10.6726	7.79903	8.39256	9.47449	7.53948	8.47701	7.57112	9.11968	8.23571	7.03234	8.20311	8.36572	6.93636	7.64884	8.34293	7.31048	7.69829	7.53249	8.35813	8.48164	8.14031	9.54761	9.13149	9.3334	8.15699	8.28319	7.87094	7.77209	9.68479	7.78112	8.08673	7.71376	8.3223	6.90177	8.28645	7.93258	8.44426	9.12598	8.37105	9.61193	8.84687	8.40474	8.20747	8.77456	7.75853	7.59165	8.25764
RP11-21L23.3	7.6537	7.98064	10.6726	7.79903	8.39256	9.47449	7.53948	8.47701	7.57112	9.11968	8.23571	7.03234	8.20311	8.36572	6.93636	7.64884	8.34293	7.31048	7.69829	7.53249	8.35813	8.48164	8.14031	9.54761	9.13149	9.3334	8.15699	8.28319	7.87094	7.77209	9.68479	7.78112	8.08673	7.71376	8.3223	6.90177	8.28645	7.93258	8.44426	9.12598	8.37105	9.61193	8.84687	8.40474	8.20747	8.77456	7.75853	7.59165	8.25764
CTD-2134A5.4	9.13799	7.44082	8.68186	9.02635	7.55385	8.90972	7.95752	7.31916	8.25102	7.46153	7.19372	6.951	8.04524	8.21322	7.52723	7.82076	7.99619	7.30359	7.71396	8.07985	8.67084	9.03676	7.9049	8.7867	8.74542	8.28537	8.01177	7.42566	7.79821	8.05658	7.7823	9.05345	8.01531	8.69506	7.34129	7.28332	8.74137	8.04936	8.69231	8.19283	8.39883	8.48562	8.78777	7.16212	7.48541	9.18153	7.7316	8.62276	9.4703
AP001434.2	7.94297	7.44233	7.54503	7.73896	6.831	7.80958	7.82598	7.25178	7.2482	7.43675	6.98041	6.58164	8.07874	8.12723	7.12394	8.06196	8.19726	7.34924	7.87657	7.43849	7.88648	8.69546	7.85038	7.66821	7.7828	7.90022	8.28795	7.43469	6.73069	8.21643	7.94507	7.74545	7.05637	7.79955	7.8013	6.59745	8.23066	7.21996	7.63499	7.9772	7.38109	8.05828	8.01224	8.23388	7.06803	7.58034	7.28537	8.45241	7.29786
LYRM4-AS1	8.6007	8.50641	10.7862	8.61515	8.28582	9.0249	8.2589	8.30104	8.5056	7.96106	8.42272	7.57412	9.39202	8.8723	7.6393	8.7993	8.27551	8.48458	8.96831	8.30524	9.83515	8.44561	9.37077	8.90856	9.16964	9.78153	8.01316	9.57609	8.31859	8.50091	9.20214	9.05737	9.21954	8.42678	7.33019	9.03854	9.23664	8.72823	8.77628	8.26551	9.10273	8.55472	9.34315	9.2218	8.45024	9.30368	9.13885	8.36466	9.0706
RP11-428J1.5	8.6007	8.50641	10.7862	8.61515	8.28582	9.0249	8.2589	8.30104	8.5056	7.96106	8.42272	7.57412	9.39202	8.8723	7.6393	8.7993	8.27551	8.48458	8.96831	8.30524	9.83515	8.44561	9.37077	8.90856	9.16964	9.78153	8.01316	9.57609	8.31859	8.50091	9.20214	9.05737	9.21954	8.42678	7.33019	9.03854	9.23664	8.72823	8.77628	8.26551	9.10273	8.55472	9.34315	9.2218	8.45024	9.30368	9.13885	8.36466	9.0706
RP11-325F22.2	7.46804	6.96874	7.66163	7.649	7.31203	8.30934	8.48304	6.92382	9.04589	7.51301	7.14642	6.73868	7.98857	8.10755	6.6544	8.61195	8.27442	7.73191	8.12015	8.05804	8.44261	7.51704	8.05271	7.89979	8.1293	8.23205	9.88742	8.22101	7.12402	8.21576	7.52271	7.39697	7.71767	8.16489	7.53045	6.92231	8.66977	7.40326	7.3468	8.1601	8.65729	8.35179	8.55404	7.16524	8.33368	8.17031	7.73639	9.01733	7.48085
RNASEH1-AS1	7.87041	8.54736	10.3048	9.34752	8.99295	9.6586	8.32643	9.27902	9.45446	9.55593	9.09251	9.32632	9.44435	8.53122	8.36012	8.37273	9.42947	8.00803	8.20132	9.40027	9.02627	10.2358	9.11708	9.40418	9.20552	9.05064	8.40086	9.78545	9.43324	9.49982	9.31839	8.7863	9.28633	8.83396	9.07804	10.1135	9.80947	8.78336	8.9767	9.23865	8.05137	9.02245	9.28382	9.7715	10.9	9.82442	8.79771	8.67033	8.42546
RP11-217B7.2	8.0148	7.35102	8.27626	8.28908	7.11808	7.63781	7.40524	7.92792	7.25463	7.61452	7.08047	6.51444	7.8825	7.9791	6.93062	7.70961	8.83404	7.19292	7.71	7.57441	7.82967	8.40634	7.54255	8.81166	7.65727	8.76364	7.10317	7.30592	6.94225	8.03522	7.94801	7.25218	7.72149	7.89839	7.40539	6.84359	8.37725	6.8437	7.4197	8.1817	7.55268	7.43087	9.25333	6.78985	7.37973	8.1612	7.55788	7.42898	8.47845
AC009133.12	9.13455	8.82161	8.15349	8.44876	7.74129	8.72789	8.51148	8.37276	8.02994	8.14866	8.33447	6.82676	8.13236	9.62889	8.22988	8.72865	9.35	8.84953	8.43369	8.28906	8.77758	7.93627	8.03856	7.973	8.95726	7.6793	8.57705	8.11604	8.04091	8.95354	9.03384	9.28186	8.89496	9.06071	8.72429	7.72615	8.10735	7.1199	8.8269	7.63305	8.77814	9.0974	7.87957	9.33867	8.52913	9.19304	8.57324	9.11054	7.87919
LOC100506314	9.48019	8.94395	7.71839	8.85036	9.2666	9.15765	8.90612	9.30328	8.30961	9.15314	10.2703	8.61427	9.37734	8.88262	8.73395	8.22988	9.76484	8.57997	8.12358	9.28507	9.7022	9.21754	10.1296	8.72539	7.84597	10.283	8.88077	9.06961	8.66151	8.87098	9.7268	9.2907	9.84385	9.37269	9.01475	9.42695	8.98116	8.55189	8.3524	9.67901	9.01042	8.25928	8.66053	10.4602	8.824	8.99414	8.11771	9.9217	9.47471
RP11-392P7.6	9.48019	8.94395	7.71839	8.85036	9.2666	9.15765	8.90612	9.30328	8.30961	9.15314	10.2703	8.61427	9.37734	8.88262	8.73395	8.22988	9.76484	8.57997	8.12358	9.28507	9.7022	9.21754	10.1296	8.72539	7.84597	10.283	8.88077	9.06961	8.66151	8.87098	9.7268	9.2907	9.84385	9.37269	9.01475	9.42695	8.98116	8.55189	8.3524	9.67901	9.01042	8.25928	8.66053	10.4602	8.824	8.99414	8.11771	9.9217	9.47471
CTA-14H9.5	8.497	8.34636	9.25679	9.68164	8.7441	8.88536	7.69371	7.37256	8.76058	8.2769	7.45365	9.13086	7.96786	7.32513	8.2392	9.27053	8.55872	7.18982	8.29512	8.77007	9.13601	9.38728	8.28491	7.61729	8.14785	8.95889	8.56901	8.23824	8.78265	8.40485	9.08312	8.66723	7.96339	9.39353	8.57632	8.70189	9.63085	8.10512	7.62769	9.41149	9.43332	8.82902	8.70893	8.65467	8.41394	9.16311	9.50545	8.89998	8.42144
RP11-835E18.5	11.9073	10.1277	10.6339	8.76557	10.6819	9.26583	8.1162	9.0756	10.0936	9.33716	8.6608	8.69694	9.54715	9.58969	9.86166	9.87742	10.2922	9.42681	9.62215	9.64259	10.339	10.5127	9.93765	9.8717	10.4793	10.6037	9.6189	9.44311	10.3996	9.95212	9.59201	8.59749	12.0159	8.98147	9.30329	9.28725	10.3812	9.97674	11.2444	10.7258	9.75168	9.93731	10.2968	9.76203	10.0422	11.5242	9.88089	10.1224	10.4695
FOXD2-AS1	9.57731	8.81851	8.46278	9.07191	8.8574	8.16467	9.30756	8.33052	8.37356	8.10882	8.72365	7.2987	8.51622	9.41928	7.97509	9.10578	8.6482	8.07835	8.50287	8.75505	8.51869	9.25612	9.47281	9.34896	8.40245	8.32036	9.24904	8.56984	7.8188	9.37289	8.42961	8.31633	8.80126	9.18584	8.69091	8.82671	9.56095	8.19665	9.06543	8.82912	9.10097	9.08595	8.98778	8.31027	8.51707	9.08	8.36607	9.5172	8.97744
LINC02012	8.68752	8.27089	7.78519	7.64875	8.58872	8.39391	8.90201	7.18034	8.04005	7.71571	8.08184	7.7046	8.80984	7.7326	6.94943	7.88285	7.99121	8.21319	8.29994	8.34123	8.52471	7.53267	7.5468	8.04267	9.24077	8.45203	7.48312	8.79842	7.51733	8.40739	9.62754	7.57509	7.58971	7.45967	7.74249	8.97556	7.90342	7.96355	8.16229	7.78709	8.28058	7.74806	8.12338	7.31534	7.65997	9.8453	7.46106	8.46263	9.23232
KB-1410C5.5	8.06316	7.65639	8.42252	7.71844	7.66108	9.0961	8.04876	8.22374	8.33509	7.6496	7.70406	8.07032	9.41294	7.77696	7.15961	7.54015	8.26167	7.94168	7.86742	8.44024	7.96513	8.41245	8.06531	7.61489	8.02242	8.05275	7.81654	7.69471	7.48261	9.4612	8.5989	8.33467	7.46356	7.8136	7.71027	7.72693	8.25769	7.52379	8.65571	7.95899	8.47235	8.34545	9.47051	8.57846	7.58361	8.34062	7.68766	8.17737	7.98736
FOXC2-AS1	8.64568	6.84758	7.41893	7.96836	6.72382	7.63781	7.9439	7.37849	8.561	7.12255	6.99657	6.50784	7.66289	7.9555	6.5662	9.19162	7.73476	6.74506	7.14115	7.24654	7.24231	7.35122	8.29797	8.45591	7.43628	7.58133	8.63717	7.13203	6.53071	7.41818	7.27173	7.3555	6.85797	7.43259	6.83663	6.66196	9.03505	6.8437	7.00372	7.32499	7.16357	7.37179	8.03868	6.75054	8.05074	7.39367	7.20676	8.16983	8.04566
LINC00992	7.70999	7.95162	7.41893	7.55237	6.73847	7.68146	7.43043	7.02682	7.21854	7.21108	7.24186	6.60237	7.67708	7.12976	6.5662	7.66824	7.6383	7.36881	6.94534	8.02559	8.37216	7.36876	7.49318	8.15956	8.31009	8.46426	7.24758	8.13757	8.13047	7.69314	7.53943	7.22317	6.85797	7.42304	7.14244	6.6221	7.6844	7.06635	8.05963	7.47298	9.28908	8.23863	7.85045	8.09492	8.29977	8.84138	7.08186	7.45943	7.1692
CECR7	8.0978	6.74037	8.82689	8.15616	7.82615	8.46099	8.02385	8.3807	7.92298	7.27209	7.376	6.52485	7.89067	8.01432	7.1687	7.99663	8.42176	8.43894	7.58648	7.47024	7.68973	8.66681	8.3717	8.16149	7.54346	7.88961	7.32388	7.19626	7.3397	8.70579	7.34883	7.35002	7.61704	7.44597	8.423	6.91954	7.76933	6.92743	7.05627	7.9807	7.36389	9.53452	8.79565	7.46086	8.12955	8.63381	9.36852	7.6172	7.24991
ADIRF-AS1	10.6433	9.22688	8.80642	9.4753	9.21169	9.02954	11.0653	10.397	9.34543	9.50447	10.5399	8.76607	9.44147	10.3144	8.51554	8.81397	9.38856	8.40788	9.56174	8.24014	9.59018	8.81849	9.5625	9.80645	8.82647	8.75002	9.33445	7.63668	8.89563	9.23818	9.93019	8.97109	10.5458	9.68967	10.4304	9.81527	9.59674	8.9641	9.11661	9.27323	9.14955	9.59743	8.40494	9.22188	7.73946	11.2575	8.24747	9.42789	9.09486
RP11-298J20.4	8.47887	7.17328	8.39817	8.02562	7.66249	8.10398	7.37875	7.59886	7.94799	8.33475	8.44098	6.69514	9.10577	8.63665	7.46893	8.43018	8.85172	8.66719	8.49823	8.80468	8.89933	8.74033	8.50049	8.52481	8.04405	9.21308	8.1513	8.875	7.69765	8.58031	8.33511	8.15796	8.15617	8.06742	7.60502	7.55799	9.04783	8.12966	8.17082	8.81109	8.05213	8.99219	9.32174	8.17468	8.45175	8.44306	8.95411	8.32436	7.36773
RP11-15H20.7	8.92625	10.0265	8.79503	8.26499	8.25354	8.8358	7.37875	8.50323	8.32146	8.15974	8.138	6.90794	8.60984	8.55757	7.59793	8.19633	8.69865	7.90971	7.90822	8.35959	9.09953	7.62534	8.12547	8.04809	9.41213	9.02693	8.63577	8.04941	7.89172	8.17266	8.90175	7.42732	9.09866	7.42232	8.17803	8.17593	9.06788	7.87544	7.23991	8.63246	9.64524	8.69252	8.70544	8.90646	7.72781	8.74244	8.4812	7.84271	7.51017
ESRG	7.46032	6.77617	7.58206	7.33746	6.79883	7.92784	7.41659	6.72914	7.0642	12.9636	7.84437	7.05383	10.9924	8.08234	6.5662	13.1083	7.50045	8.75724	7.49048	7.49186	7.33248	7.36402	7.67614	11.1094	7.60673	7.86102	12.3156	7.96357	6.7168	9.50812	11.3233	7.34336	7.05016	7.34852	7.0626	9.86115	8.20274	6.8437	10.9523	7.42677	10.6788	7.66843	7.75147	11.3712	7.04672	7.37819	7.0699	7.56233	7.38184
RP5-1185I7.1	7.75609	7.11012	9.31825	7.25905	8.32727	7.77579	7.42968	7.76922	7.33803	7.95216	9.10043	6.94466	7.87984	7.46861	8.35092	7.05368	8.1417	8.22795	6.9845	7.81193	9.24744	7.37734	7.49318	8.50384	9.00625	9.6879	7.69611	7.53753	8.24276	8.87481	8.18667	7.45128	7.70623	7.3242	7.85317	9.11527	7.69713	7.54592	7.70892	8.15453	8.02843	8.05671	7.83087	7.42636	7.03108	9.29206	7.39349	7.45527	8.84414
RP13-638C3.3	7.79038	8.97467	8.09091	8.25876	8.27173	7.81919	8.1856	8.12672	8.58269	8.78539	8.6883	8.32096	8.37211	7.73705	7.92986	8.41226	8.78038	8.46382	8.30412	8.72654	8.42697	8.36985	8.40639	8.92392	9.2935	8.57497	9.133	8.4534	8.53095	8.61176	9.09817	9.13559	7.66752	7.67592	8.66452	8.52128	8.94716	8.21481	8.39168	8.23227	7.90375	8.1496	7.89062	8.8678	9.12783	7.82832	9.28204	8.37513	7.92754
RP11-273B20.1	9.24994	9.07931	8.09492	9.01004	7.66619	8.87155	7.516	8.40851	8.06202	8.7568	8.49454	6.50784	8.71258	9.38224	7.8612	9.0906	9.56551	8.4999	8.37593	8.6237	9.51473	8.34023	8.76396	9.08104	8.88868	8.59297	9.05153	8.32935	8.33947	7.84567	8.66964	9.38994	8.94348	8.93822	7.4576	8.05931	8.55164	7.57227	8.21878	8.55066	9.13119	8.57649	8.03	10.0287	8.44494	8.32959	9.16819	10.2481	9.27921
RP11-555M1.3	8.68543	7.66087	9.22025	8.48562	9.8331	8.18508	7.95957	7.65492	8.48651	8.35895	8.05553	7.50442	8.43826	8.29169	8.14389	8.10845	9.11903	8.88924	7.88829	8.60789	9.8293	8.82073	8.43321	9.27911	9.25358	10.2547	8.56676	9.57637	9.24083	9.06876	8.87937	8.85536	8.9829	8.82387	8.15797	8.07248	8.65644	8.62613	7.94282	8.46247	9.07753	8.77448	8.43684	8.36974	8.15304	9.47409	8.92552	8.60732	8.61842
RAB11B-AS1	9.06508	9.41242	9.35059	8.77728	8.62476	9.8538	8.41256	9.00132	8.72412	7.88782	8.52199	9.12189	9.88611	8.39166	8.66864	8.75832	9.05338	8.71979	8.51011	8.25857	9.43147	8.02124	8.85341	9.44999	9.06688	9.46954	8.44687	9.29184	9.01791	8.83486	8.72451	8.04521	9.07257	9.26297	8.45549	7.64979	8.89093	8.30751	8.09765	9.52379	9.37004	9.00436	9.32733	9.01317	9.13213	9.74643	8.75276	8.69668	8.95957
ZNF503-AS2	8.47869	8.20201	8.47226	9.04114	8.08299	9.01109	9.30222	7.96228	7.56556	8.40338	8.38031	8.12767	9.4639	8.09266	6.83838	8.06863	8.87052	8.45567	7.77565	8.41112	9.0333	8.95598	8.57267	9.20276	9.42943	9.9139	8.08788	9.40572	8.27296	8.84613	9.36379	7.8057	6.94885	8.99894	7.40529	8.58904	8.31197	9.0187	8.8794	9.27553	9.03132	9.34182	9.21812	7.80646	8.89836	8.95458	8.87088	8.47768	9.54522
RP11-384O8.1	7.52327	9.4732	9.16521	7.41714	8.36102	8.11743	8.0346	7.41634	7.22152	9.34314	7.09955	7.56255	7.99715	7.15178	7.02318	7.73323	7.7375	7.14869	7.12721	7.82381	8.84578	7.75945	7.49318	8.68244	7.99369	9.00203	7.80953	8.3225	7.49086	7.93691	9.07398	7.63643	9.4115	7.58141	7.84596	8.20815	8.09762	7.98512	9.82188	8.83655	9.11934	7.94879	8.71761	9.85259	7.71442	9.19402	7.90537	7.62169	8.40988
AP000487.6	8.57612	9.80755	8.12804	8.56351	7.12478	7.88105	9.17454	7.0174	8.92639	7.45596	7.03222	9.74005	7.95108	7.26346	8.00047	10.8396	7.89197	7.60835	7.79982	7.74101	7.62296	8.41726	9.00893	7.81742	8.93674	7.79638	7.59806	7.29958	7.27326	8.86248	8.34182	9.3281	7.35984	8.36792	7.38368	7.35901	8.56801	7.26738	7.45241	9.07605	7.70778	7.94897	7.89485	7.5857	9.44893	7.83504	8.19977	9.23007	7.75808
LINC00491	10.5997	9.33134	9.57494	7.2537	9.43821	8.41906	8.12023	8.32518	7.05752	8.38742	8.9651	7.45296	9.70863	9.16043	8.9013	9.41147	7.63985	8.52096	8.38889	8.6053	9.1312	8.94786	8.3042	8.437	8.58	9.09582	8.38868	8.48535	8.85333	9.03617	8.81641	8.12679	6.97268	9.18458	8.31004	8.35131	8.9284	8.59307	9.11348	8.82066	10.1046	9.40483	8.62163	8.67839	7.73044	8.88962	8.87166	8.22737	8.80331
AC145124.2	8.15256	7.51203	7.73531	7.55474	6.89844	7.92601	7.46459	7.08851	8.36492	8.01646	8.68021	6.50784	8.41027	7.99777	7.07922	8.36487	8.25332	6.99726	8.32178	8.54702	8.23911	8.28088	8.02394	8.83766	8.29107	8.07818	7.96379	7.99189	6.912	8.31662	7.74465	8.37088	6.9948	7.51918	7.18052	6.76628	8.0914	7.38637	8.45085	8.03689	8.05117	8.60508	9.14742	7.67082	7.51399	7.72653	8.25242	8.17225	7.7732
RP11-10C24.1	8.80815	7.38591	9.3678	8.9723	7.96975	8.82506	8.26978	9.19994	8.41743	7.65906	8.0542	7.36785	9.34089	8.39315	8.35928	7.93115	9.07938	8.5943	8.92872	8.57618	8.49442	8.78827	9.07095	8.36599	8.47494	9.18047	9.45805	9.00256	9.08149	8.54356	8.14589	8.95287	7.61498	8.66987	8.5217	7.68039	9.22454	8.63558	8.5427	9.03117	8.61483	9.05434	9.98227	8.15077	7.54926	8.42531	7.6096	8.1405	8.16108
RP11-326C3.2	7.66036	8.18727	9.11186	8.02612	8.96706	8.00723	7.59374	8.18785	9.52259	7.96187	7.64818	6.8713	8.06229	8.10172	8.8575	8.82824	10.2204	8.81897	8.04117	8.59455	10.3018	7.98651	7.56172	8.34543	8.42509	8.65661	8.56114	8.33719	8.10796	7.63468	8.46261	9.40601	11.8477	8.30812	9.01745	8.27832	8.05585	7.54911	8.4766	8.034	8.43876	8.30707	7.78703	9.47513	8.66197	7.91048	8.6591	9.27935	8.08169
CTC-429P9.5	8.52606	9.73677	8.50394	7.81546	7.69432	8.25621	7.48498	7.41181	8.03047	8.53961	7.83129	6.79963	8.8373	8.46131	7.359	8.60916	8.78051	8.68807	8.63654	9.29248	9.02736	8.14593	7.94024	8.65328	9.17446	9.28136	8.12107	8.47132	7.90507	8.48968	8.70988	8.80901	8.18594	7.8877	7.17788	7.18093	8.10986	7.57597	8.46767	8.31566	9.0428	9.31243	9.18055	8.59647	8.01042	8.72893	7.81206	8.30101	7.85589
LOC283140	8.16428	7.2137	8.36796	9.32874	8.70778	8.23445	8.06306	8.23902	7.96197	8.25031	7.33729	6.62577	8.46777	8.89412	6.92473	7.92549	8.38915	7.2273	7.43469	8.29415	7.81758	8.52338	7.99956	9.19882	7.94038	8.1216	8.98144	8.25789	7.31255	7.67087	8.30644	10.1988	7.00593	8.06955	7.95359	7.70641	9.23994	8.47343	7.91273	7.91102	9.28717	7.91868	7.86044	7.06945	7.29017	8.30142	8.83001	7.46131	7.74267
RP11-356J5.12	8.16428	7.2137	8.36796	9.32874	8.70778	8.23445	8.06306	8.23902	7.96197	8.25031	7.33729	6.62577	8.46777	8.89412	6.92473	7.92549	8.38915	7.2273	7.43469	8.29415	7.81758	8.52338	7.99956	9.19882	7.94038	8.1216	8.98144	8.25789	7.31255	7.67087	8.30644	10.1988	7.00593	8.06955	7.95359	7.70641	9.23994	8.47343	7.91273	7.91102	9.28717	7.91868	7.86044	7.06945	7.29017	8.30142	8.83001	7.46131	7.74267
AC108142.1	8.77233	6.91377	7.42477	7.9575	6.72382	8.4003	7.99463	7.71633	7.71005	7.794	6.87715	6.51128	8.04963	7.79965	6.57488	7.90968	7.67665	6.79101	8.01092	7.32869	7.35364	7.69372	8.25207	7.39867	7.47163	7.58133	8.20179	7.13597	6.54166	8.13467	7.29494	7.40897	6.90248	7.48593	7.55183	7.08213	9.39558	6.86287	7.03803	7.42785	7.22098	7.30527	7.82693	6.92512	7.44815	7.34173	7.06713	8.01913	8.50744
RP11-521D12.5	9.15301	6.95466	8.57962	7.58216	7.53233	7.9448	9.31351	7.70008	7.94824	8.30927	7.89167	7.03822	8.58201	8.03774	6.8944	7.34875	7.94643	7.26977	7.11357	7.46932	7.96649	9.07649	7.62992	8.79877	8.09973	7.98877	8.29553	7.6616	8.24344	8.33534	7.56502	8.25755	6.88283	7.62874	7.89737	8.61037	8.34254	7.49624	7.26149	7.76986	7.28473	8.42374	8.2988	7.13268	7.12805	7.46436	7.16451	7.61357	8.96917
AC128709.2	7.86934	10.2515	7.87346	7.2537	8.63773	7.67924	7.5271	6.91851	7.11162	7.12255	8.75277	6.50784	7.71409	7.67334	6.63942	7.15826	7.64849	7.88295	7.22433	7.33019	8.1575	7.56096	7.53033	8.15983	9.95306	8.40457	7.2064	7.19847	7.61369	8.27648	8.66064	7.66103	8.26323	7.38153	7.4895	7.60396	7.7275	8.06881	8.46375	7.80143	7.86604	7.61292	7.65104	8.4941	7.49922	10.4413	7.11773	8.40281	7.93706
MAFA-AS1	9.18855	8.30419	7.87147	11.0318	7.82162	7.89207	7.51632	6.72439	7.15241	7.87337	6.84898	6.75289	7.66289	9.06043	8.35944	7.73198	7.52152	8.50367	7.07338	7.43193	7.35653	7.35122	7.60196	7.73447	7.43628	7.58133	7.36002	7.13203	6.60023	7.74197	8.60727	7.53596	8.15729	7.6339	8.50752	7.03116	8.06629	6.8437	8.3539	7.90978	7.62871	8.68863	7.79854	7.26169	7.03434	7.58976	7.15643	7.80586	7.41283
RP11-657O9.1	7.71659	9.02017	7.88206	8.01561	6.7604	8.05915	7.55262	6.74152	7.04595	7.16922	6.86841	6.50784	7.6748	7.30091	6.5662	9.14063	7.69868	6.99097	6.9971	7.3815	8.5172	7.66408	7.49318	8.14694	8.83689	9.10882	7.12752	7.90279	6.73034	8.26402	8.9355	7.77171	6.85797	7.49135	7.44385	6.66385	7.88884	6.8589	7.50533	8.52159	9.07252	8.55799	8.90733	6.85592	7.04106	7.36858	8.55643	7.41582	8.32493
AF131216.5	7.70174	7.86958	8.31902	7.48138	6.98906	7.66155	8.36935	6.7059	7.12081	7.12255	7.95486	6.82597	7.66289	7.76713	6.5662	7.38059	7.47433	6.74506	7.1173	7.3248	9.1022	7.94488	7.49318	8.22349	8.42665	9.08152	7.26175	8.86676	6.63495	7.76951	8.43043	7.50022	6.85797	7.51403	6.96315	6.91508	7.84909	7.17621	8.6112	7.44359	8.39085	7.55966	8.88842	7.4402	7.22636	8.09868	7.29549	7.38642	8.57927
RP1-151F17.1	8.3153	8.21297	8.81056	8.98378	8.88238	8.05707	7.78949	7.82794	8.22477	7.97781	7.77973	6.88015	8.75749	8.26112	7.8197	7.50319	8.41589	8.22871	7.79809	8.45232	8.89537	8.26807	8.20556	8.4447	9.03396	8.76274	8.60086	7.92623	6.73455	9.29495	8.63977	7.98318	9.01168	8.17699	7.43919	7.45104	8.88686	7.65159	9.66006	8.33343	8.90082	9.34999	8.73162	9.40524	7.5168	8.62917	7.73172	8.27744	7.42714
CTD-3138B18.5	9.21341	8.07382	8.68698	8.2009	8.49938	8.74876	11.6151	9.87788	8.89088	9.08598	9.98753	8.71193	8.86297	8.67275	8.51195	8.80048	8.60763	8.23394	9.07168	8.56899	9.06157	9.65212	9.52921	8.83123	9.16516	9.33761	9.30422	8.99764	8.04945	9.05646	8.45559	8.36975	8.78484	8.83409	9.69911	8.41926	9.41313	8.37893	8.38507	9.29685	9.34837	9.13478	10.764	8.56392	9.39894	9.05161	9.03048	8.64586	9.54449
LOC105372482	9.21341	8.07382	8.68698	8.2009	8.49938	8.74876	11.6151	9.87788	8.89088	9.08598	9.98753	8.71193	8.86297	8.67275	8.51195	8.80048	8.60763	8.23394	9.07168	8.56899	9.06157	9.65212	9.52921	8.83123	9.16516	9.33761	9.30422	8.99764	8.04945	9.05646	8.45559	8.36975	8.78484	8.83409	9.69911	8.41926	9.41313	8.37893	8.38507	9.29685	9.34837	9.13478	10.764	8.56392	9.39894	9.05161	9.03048	8.64586	9.54449
AC009948.5	8.9756	9.50704	9.17686	9.32486	8.63947	9.21676	7.61502	8.15703	8.50346	8.42204	7.98439	7.84308	8.54454	8.96662	7.18795	9.47286	8.76824	7.49639	8.2686	8.70539	9.03442	8.97825	8.9295	9.10392	9.2887	8.59216	8.98968	8.81325	7.66594	9.5393	9.08711	9.4796	9.00224	9.14298	8.58746	8.01805	9.40241	8.25133	9.04562	8.9589	10.244	9.44491	9.23889	9.21567	8.22568	8.3788	8.6132	8.73302	8.63704
LOC101927027	8.9756	9.50704	9.17686	9.32486	8.63947	9.21676	7.61502	8.15703	8.50346	8.42204	7.98439	7.84308	8.54454	8.96662	7.18795	9.47286	8.76824	7.49639	8.2686	8.70539	9.03442	8.97825	8.9295	9.10392	9.2887	8.59216	8.98968	8.81325	7.66594	9.5393	9.08711	9.4796	9.00224	9.14298	8.58746	8.01805	9.40241	8.25133	9.04562	8.9589	10.244	9.44491	9.23889	9.21567	8.22568	8.3788	8.6132	8.73302	8.63704
RP11-204L24.2	8.21453	8.51816	7.67629	7.76766	7.0853	8.64515	7.37875	7.55266	7.72523	7.50003	7.29991	6.56354	7.92585	7.66908	7.08174	7.63077	7.61259	7.14237	7.50383	7.79997	7.72457	8.01719	8.45749	8.0423	7.79946	8.56181	8.93327	7.54322	7.57454	8.83612	7.99861	7.61592	7.32658	7.43946	7.57012	6.85839	8.16894	7.56776	8.16349	8.01006	8.64224	8.31732	7.93672	7.31421	7.25077	7.36107	7.32286	7.9648	7.95462
RP11-350J20.5	7.96924	6.97665	7.83962	9.37464	6.72382	9.67794	7.37875	7.36481	7.77691	7.60452	7.66722	7.75272	7.66289	8.00409	6.74844	7.27278	8.56981	7.57498	8.06518	7.84552	7.33027	8.71163	8.82598	7.44513	7.43628	7.99821	7.273	7.1877	6.91926	7.47034	7.39995	7.49901	8.14601	8.44098	6.92159	7.40132	8.93681	6.96879	8.3175	7.42323	7.53902	7.51437	10.083	6.98221	7.07365	8.07918	7.33003	7.8798	7.45649
RP11-254F7.2	8.71465	9.51146	9.17651	8.85363	8.91915	8.44252	8.45861	7.56111	8.38047	8.21796	8.58851	7.09378	8.27434	7.92286	7.76624	8.72983	8.56428	8.06215	7.9717	7.94188	8.9081	9.87459	8.34662	9.31935	9.12354	8.42834	8.26449	9.02144	7.88475	8.17715	8.36794	8.56241	9.36232	8.15043	7.77758	7.65914	8.71235	8.43005	8.00272	8.67	8.24707	8.85383	8.82951	8.5545	9.78405	9.42633	8.59191	8.89387	7.8189
CTC-429P9.1	8.21878	10.0537	8.636	8.09633	8.36316	8.65995	7.39916	7.91155	8.63764	8.87286	8.11496	7.31853	9.38305	8.73528	7.51227	9.13107	9.01267	9.00016	8.94836	9.69302	9.47511	7.88177	7.88223	8.63996	8.91159	9.26916	8.38252	8.58381	8.18184	9.13662	8.73699	9.01878	8.07618	7.5651	7.59619	7.48854	8.36226	7.92311	8.29739	8.75599	8.79457	9.61324	9.40092	8.37831	8.1382	9.21621	8.19774	8.58323	8.44504
LINC01094	8.59945	7.84309	8.38991	7.698	7.112	8.1776	8.57692	8.12774	7.50726	8.29968	7.21053	6.65843	9.93861	7.93343	7.09897	8.37721	8.36616	7.20343	8.87431	7.94405	9.03099	9.46623	8.78478	8.16049	8.22482	8.69005	8.03335	8.07736	6.90084	8.87234	7.8941	7.64353	7.47996	8.55118	7.91442	8.7676	8.47623	7.94372	7.8232	8.35037	7.49496	8.55534	9.17935	7.43699	8.01694	9.29407	7.65077	8.17143	8.42654
LINC01842	8.03325	6.74708	7.78256	8.00597	7.22161	8.34911	8.80089	7.53488	7.17681	9.26949	7.28549	6.55574	8.18318	7.5078	6.62639	7.38868	7.88473	6.76575	7.84679	7.41192	7.3475	7.79457	7.52365	8.52442	8.20411	7.58133	7.22888	7.30238	6.77969	7.69452	8.0607	8.1365	6.95068	7.36966	7.21622	7.43885	9.24976	6.89721	7.31143	8.12469	10.3753	7.41874	8.09061	7.89042	7.09504	7.40596	7.56916	7.64021	7.60878
CTD-2147F2.1	7.65614	8.25243	7.69638	8.96864	6.75748	8.70925	7.37875	7.05617	6.9972	7.1622	6.87076	6.63328	7.66289	7.90662	6.5662	8.72282	7.50743	8.74927	6.96367	7.24654	7.39485	8.5971	7.49318	7.52618	8.10146	7.67478	7.11371	8.58259	6.541	7.84641	8.78614	9.24378	6.85797	7.31495	7.61924	6.56669	7.72142	6.88526	7.06884	8.61303	10.5653	9.88979	7.85109	8.73277	7.15343	7.32333	8.5271	7.38642	7.1692
CARD8-AS1	8.62813	8.88217	8.67573	8.00711	7.73421	9.25342	8.66776	7.56386	9.35084	8.20922	7.88364	7.54831	8.66002	8.46476	7.21958	8.64454	8.92672	8.40732	8.82088	8.607	8.96027	9.22031	9.13217	8.45959	8.57393	9.67065	8.48795	8.83148	8.05789	9.30431	7.96399	8.13116	8.21341	8.75925	8.47614	8.79541	9.20938	8.20516	8.51424	8.6976	8.65932	8.97903	9.36437	8.18788	8.17349	8.65745	8.12619	8.66585	8.12559
RP5-884C9.2	7.82539	7.66951	8.08482	7.69315	6.92508	8.44834	7.65488	7.79036	7.13473	7.21509	7.19673	6.50784	8.88856	7.64672	6.5662	7.45022	8.51135	6.94647	7.27619	7.57213	7.74226	8.28993	8.0975	7.50079	7.62186	7.58133	7.47363	7.1343	6.65376	7.35579	7.38467	7.30206	7.08779	8.01496	6.95727	7.55885	8.13317	6.9101	7.05698	7.67828	7.40551	7.7268	9.86171	6.91244	7.06326	7.47889	7.50077	7.48537	7.8233
LINC00205	9.34119	8.76263	8.23133	8.83108	8.71025	9.33028	8.62382	9.08766	8.37744	8.25301	8.02883	7.81273	8.3611	9.07735	8.84135	9.78367	8.10639	7.71401	7.78846	8.34424	8.64952	9.58642	8.81129	8.92889	9.06495	8.92693	8.42477	9.43751	7.96188	8.85824	8.24588	8.58066	9.66475	8.58567	8.16479	8.58521	9.32677	8.8054	9.24365	8.70276	8.63759	8.39451	8.71676	8.14318	7.92001	9.18708	7.82909	9.25409	10.3024
RP1-86C11.7	8.94029	7.15585	8.50683	8.2772	7.19355	8.37607	8.20684	7.67458	8.42716	7.38368	8.73452	7.30047	8.06888	8.15057	7.76987	7.83166	8.58349	8.09617	9.0498	8.23746	8.02479	7.64154	8.26304	7.88806	9.14205	8.28469	8.48408	7.27355	8.49753	8.22811	7.64017	8.09791	7.20234	8.68399	8.04953	8.353	8.02549	7.04971	8.24613	7.59799	7.92755	7.80212	8.24266	8.4165	8.75059	9.8981	7.47884	7.55539	8.08947
LINC00623	8.48153	7.79451	8.13743	8.60117	7.53887	8.54912	7.44075	8.15551	8.30437	7.6976	8.14519	6.79907	8.55248	8.77793	8.66614	8.87219	9.17393	8.30326	8.08652	8.35062	8.19432	8.71334	9.11171	8.59189	8.22598	7.92449	8.28219	9.04579	8.10602	8.49879	8.52967	8.93234	7.4071	8.89285	7.54976	6.83355	9.18617	7.31074	8.29111	8.78495	8.49903	8.60017	8.48444	7.56019	7.63629	8.08924	8.00907	8.5992	7.98029
CTD-2186M15.3	8.25664	8.00367	9.87229	9.44422	8.96544	9.69496	8.20339	9.03971	9.59719	8.54355	8.42057	7.70758	8.82208	8.28103	7.59749	8.07496	9.50268	9.03427	8.06959	7.9775	9.1535	8.80987	8.48939	8.96327	8.84731	9.09134	8.47702	8.62006	9.23467	8.61601	8.41053	8.46432	7.93379	8.66995	7.92877	7.86253	9.09302	8.68722	8.21217	8.8279	9.49024	8.76695	10.2769	9.65327	9.78597	8.44269	8.31051	8.97409	8.71077
AC114803.3	8.30976	7.12112	7.63252	7.94893	6.72382	7.63781	8.02488	6.97587	6.9972	7.28791	7.02305	6.83305	7.8749	7.34781	6.95833	9.03401	7.57425	6.83591	6.94534	7.53889	7.24231	8.95289	7.49318	7.87799	7.43628	7.58133	7.53944	7.32666	6.53071	7.65427	7.85428	7.95891	6.85797	7.31495	6.83663	6.56669	8.05477	6.8437	7.65113	7.87676	7.16357	7.23459	7.62438	6.75054	6.99868	7.55014	7.03728	8.04559	8.51534
KB-1732A1.1	9.00373	7.33143	8.31129	10.1672	7.09914	8.72256	9.02275	8.02477	7.9184	7.61535	7.46179	6.87957	8.77985	8.51972	6.9363	7.32399	8.70823	7.23725	7.82905	7.95413	7.78701	8.59051	8.36304	7.80503	7.95955	7.95533	8.56956	7.5044	7.22808	8.3638	7.68016	7.59646	7.36768	8.05307	9.06019	8.35023	9.34735	8.21108	8.00625	8.40031	8.12607	8.23427	8.23148	7.59965	7.65995	8.16082	7.35611	8.10468	8.93709
AC007249.3	7.44882	8.38515	7.67339	7.30274	7.42582	7.67018	9.00688	6.80663	7.21768	7.49921	7.55696	7.09529	7.6936	7.14784	7.22613	7.6115	7.67901	7.14049	8.14475	7.41361	8.5929	7.35122	7.54009	9.92688	8.54672	9.85947	7.2647	7.87532	6.9264	9.03244	9.2572	9.53523	8.22948	7.64047	7.65105	7.81103	7.71186	7.29338	9.00771	8.63021	8.03408	8.32766	7.691	10.4152	7.37399	8.04004	7.23687	7.71435	8.53139
CTD-2003C8.2	8.48464	6.98315	7.57325	8.52844	6.81011	7.8005	8.20478	8.09958	8.03393	7.18112	6.8846	6.50784	8.08491	8.96351	6.61502	7.13255	8.05888	6.84144	7.9197	7.51695	7.70595	7.48515	8.71947	7.43993	7.53409	8.03292	7.54063	7.25642	6.61015	8.22728	7.57142	7.85526	6.90864	8.37743	6.98535	6.67627	8.94869	6.90433	7.6991	7.58665	7.44608	7.38265	8.65011	6.88246	7.35186	7.5707	7.25279	8.7008	7.78585
RP11-196G18.24	9.55573	8.59392	9.37517	9.26004	7.95037	9.3387	8.11777	8.59984	8.47432	8.66472	8.66765	7.87626	8.71018	8.93249	7.78534	9.34525	9.65913	8.88339	8.77995	8.60768	9.50377	8.76392	8.27087	9.44843	9.36901	8.61253	8.80911	9.66372	9.73992	9.2487	10.5192	9.8565	8.86364	9.06917	8.84361	8.30147	8.35373	8.5802	9.31047	8.92429	9.17346	9.57022	8.95537	9.11041	9.31637	10.1873	8.30665	8.87318	8.77895
LOC400541	11.7912	9.99093	11.6738	11.3264	10.4568	11.8827	8.94222	9.91041	11.3041	11.4858	11.4021	9.6288	11.1743	11.1929	10.599	11.5467	10.9128	11.6687	11.0067	10.8296	11.2073	11.848	11.604	11.9478	11.3763	11.0992	11.3081	10.9934	10.5491	11.002	11.5849	10.9694	10.0026	10.7351	10.8491	10.2026	11.3382	10.8845	10.8291	11.1018	11.9559	11.4747	11.8613	10.654	11.7837	11.2545	11.749	10.5765	11.0066
RP11-296I10.3	11.7912	9.99093	11.6738	11.3264	10.4568	11.8827	8.94222	9.91041	11.3041	11.4858	11.4021	9.6288	11.1743	11.1929	10.599	11.5467	10.9128	11.6687	11.0067	10.8296	11.2073	11.848	11.604	11.9478	11.3763	11.0992	11.3081	10.9934	10.5491	11.002	11.5849	10.9694	10.0026	10.7351	10.8491	10.2026	11.3382	10.8845	10.8291	11.1018	11.9559	11.4747	11.8613	10.654	11.7837	11.2545	11.749	10.5765	11.0066
TFAP2A-AS1	8.30874	8.06008	8.77307	8.16175	8.01717	8.76648	7.98878	8.62801	8.10886	7.49568	7.59638	7.46773	8.43868	7.97382	7.38173	7.6854	8.49051	7.62849	7.58136	8.3751	8.26471	7.98316	9.11074	8.2944	8.25487	8.25217	8.18983	8.13185	7.41236	8.2175	7.82395	7.51283	8.50792	8.67291	7.50749	7.54864	8.50904	7.5697	7.90424	7.98322	7.76256	8.1171	8.87534	8.88517	7.94252	8.60787	8.56339	8.70066	8.29012
LINC00302	7.50259	6.94073	7.51689	7.41816	6.80979	8.39659	10.3845	7.18096	7.80438	7.32045	7.10778	8.07756	12.2488	7.2856	6.5662	7.05738	7.71632	8.89614	7.92982	7.85528	9.73018	7.35122	7.49318	7.37603	7.60853	8.09141	7.10317	7.17499	6.83829	8.14436	7.59637	7.37535	6.85797	7.46034	7.66808	7.19831	7.80632	6.8437	7.02525	7.55105	7.74871	7.67617	8.47666	7.25131	7.0913	7.6589	7.03728	7.66831	7.60751
CTD-2538C1.2	8.17401	7.97953	8.41987	8.86343	7.97822	8.80795	8.1385	7.7547	8.55065	8.44165	7.5153	7.98424	8.97337	8.61377	7.60107	7.92469	8.40402	7.99071	8.40903	8.40099	8.30055	8.9395	7.74616	8.36785	8.77466	9.16242	7.95598	8.84207	9.06286	8.40576	8.05737	7.78931	7.75502	8.16581	8.17161	6.73722	8.51761	7.9702	8.21463	8.92731	8.44695	8.16082	9.3692	8.57852	7.69449	8.16982	7.72462	7.99209	7.70266
RP5-943J3.2	7.52885	7.57402	8.26821	7.97881	9.41247	7.89669	7.68923	7.38626	7.86593	7.91549	9.43704	9.53425	7.70909	7.30954	8.39453	7.8064	7.73511	8.24468	7.43112	7.89355	8.22116	7.56669	7.57419	8.05209	8.06108	8.36976	7.10317	8.58123	8.3289	8.2345	8.00228	8.02567	8.09872	7.82139	8.68282	7.31829	7.90337	8.63416	8.27189	8.02653	8.305	8.6261	7.79286	8.52382	8.98717	7.82187	7.48256	8.68089	7.58187
MINCR	8.6481	8.20766	9.24635	9.28539	8.27558	8.58576	8.2177	8.68898	9.14257	9.06532	10.0119	8.55467	8.67341	8.79498	8.20932	8.97122	8.60627	8.69946	8.25214	8.54717	8.68037	8.58592	8.74089	9.2578	9.7091	8.65562	8.24897	9.027	8.62192	8.64721	9.1669	9.31248	9.3788	8.31828	8.69426	7.72746	9.26468	7.90056	9.0366	8.57972	8.2243	9.03989	8.99254	9.2096	9.86282	8.86634	8.69412	8.56525	8.88148
LINC01637	7.56092	7.63597	8.88306	7.71403	7.31045	7.76286	7.7961	7.84013	8.05666	8.26935	7.03605	7.85758	7.92396	8.28652	7.5497	7.61764	8.25817	8.27645	7.29012	7.78519	8.40259	8.30969	8.00843	8.83886	9.05591	8.20599	8.37267	8.02933	8.02247	7.99038	8.52513	8.70332	8.54952	8.59594	7.43218	6.8189	8.64364	7.35092	8.46278	9.54047	8.21184	8.23599	9.00013	6.98148	8.34491	8.2701	8.39976	8.05403	8.76347
RP11-3B12.5	8.56493	6.91608	7.80852	7.81067	6.72382	10.4216	7.37875	7.54053	6.9972	7.39315	6.84898	6.737	8.08427	7.29126	6.5662	7.03912	7.48064	7.03524	7.61455	7.24654	8.32917	8.78375	7.53192	7.55772	7.79694	7.58133	7.91693	7.46946	6.84498	7.73988	7.60843	7.97285	6.85797	7.31495	7.38525	6.87083	7.69388	6.97642	7.07299	7.73753	7.16357	8.13279	8.05756	7.20536	7.20852	7.36454	7.13463	7.4198	7.40448
LINC02195	7.77904	7.69051	8.07172	7.46753	8.17308	8.14768	7.81679	7.48629	7.25944	7.38007	7.2072	8.03125	7.93696	8.33614	6.64403	7.75055	9.19586	7.56346	7.3251	7.88409	9.74441	8.01666	9.46216	7.73765	8.5295	8.07944	7.72344	7.71561	6.66907	8.88905	7.85284	7.5745	7.72975	9.63948	8.54136	6.79841	8.98877	7.93575	8.07797	8.19804	7.79018	7.85754	8.17925	7.19201	9.25127	8.47092	7.37593	9.23312	7.83065
LINC00526	11.9718	10.3198	10.691	8.94745	10.8401	9.41873	8.23295	9.19702	10.2287	9.30789	8.82446	8.75501	9.51601	9.61026	9.95547	10.0434	10.3969	9.46895	9.65253	9.57373	10.2676	10.6027	10.046	9.85385	10.5955	10.5622	9.63288	9.60702	10.5539	9.96776	9.818	8.63101	12.2194	9.11579	9.57235	9.75346	10.2692	9.78405	11.197	10.6987	9.84567	10.0191	10.2491	10.0776	10.2672	11.421	9.9792	10.1496	10.5583
SNORA71B	8.04848	9.33192	7.63686	8.05512	7.05225	8.01582	7.41043	7.4416	7.5782	8.0146	7.994	6.64036	8.71455	8.8737	7.12767	8.5643	8.64273	8.81354	7.28967	8.42163	7.72811	7.84546	7.49318	8.076	8.68158	8.20649	7.77824	7.92382	8.02256	8.28117	8.46004	9.11308	7.22914	8.0721	6.83663	7.15373	8.25769	7.28079	7.26079	7.63722	8.30876	8.20997	8.1292	8.51575	7.65072	7.4545	8.21429	8.45064	8.16735
RP11-218E20.3	7.55351	6.78177	8.0807	8.36794	6.99611	9.47078	8.94496	7.9402	8.09152	7.28125	7.4379	6.8855	8.40643	7.43925	6.98423	7.18485	8.66533	6.90743	7.35676	7.72056	7.83665	8.26219	8.45909	7.94739	7.93198	7.78972	8.18749	7.35654	7.59283	7.67492	7.65918	8.20763	7.10492	7.84176	7.33207	7.00362	8.93364	7.27965	7.96448	8.13352	7.53499	8.22205	8.1741	7.00885	7.05506	7.36786	7.12519	7.45359	8.44476
RP5-894A10.6	8.02245	8.92241	8.36738	7.7386	8.17086	8.07317	8.12181	8.52878	7.87647	8.37711	7.95558	7.26567	9.08025	8.44195	7.73238	8.56641	9.2091	8.65113	7.91021	8.98484	9.72018	9.43905	7.89811	8.53043	9.54639	8.42806	8.46555	8.52589	7.81282	8.9238	8.57673	8.93325	8.69727	7.72669	8.05824	7.82038	8.59299	8.44491	8.59118	8.87541	8.41573	8.21079	8.50884	7.87088	8.31341	8.50338	9.25395	8.65208	9.12231
CTD-2269F5.1	7.89154	6.9324	8.15282	7.60683	6.7648	8.19523	7.37875	7.15966	7.40681	7.9054	6.93436	6.72971	8.20159	8.15696	8.43479	7.1232	8.0633	6.80806	7.21562	7.7782	8.65135	8.53694	7.94365	8.90886	8.28595	7.71264	7.88256	7.52007	6.58747	8.5465	7.90446	8.08492	8.41232	8.92245	8.11637	7.3424	8.10042	6.99473	7.61074	7.58645	7.31587	7.65004	8.03834	7.34848	7.09452	8.33568	7.42729	7.59547	8.69724
LINC00857	7.4887	6.97965	9.5455	9.99144	7.08018	8.49841	7.40621	7.51014	8.04199	7.24594	8.3141	7.06398	8.16887	7.72303	8.26088	7.17921	8.7587	9.36966	7.55436	8.03679	7.57064	8.25005	8.03054	7.56908	7.60716	7.61921	7.73884	7.32445	9.9153	7.74308	7.5603	8.56296	7.42239	8.62763	7.56006	7.90034	9.04703	9.13784	7.15278	8.02777	7.35284	7.55059	8.43154	9.1606	7.13113	7.64788	7.12968	7.51823	7.3821
CTC-429P9.2	8.79526	9.99621	8.39135	8.33001	7.81779	8.79609	7.37875	8.06547	8.75478	8.95988	7.99653	7.07904	9.47376	8.85552	7.66343	8.68285	9.23151	8.89953	8.93475	9.24191	9.5825	8.37689	8.01353	9.06293	9.17735	9.16409	8.15525	8.78711	8.4639	9.17026	8.62052	8.92512	8.62974	8.2749	7.633	7.85439	8.36921	7.90994	8.95124	8.807	9.17163	9.4468	9.2824	8.69973	7.97802	9.21455	8.21114	8.76291	8.28901
AC007879.5	8.32694	7.84607	8.30547	11.3984	7.37807	8.41575	8.09811	8.56832	7.76061	8.92333	7.75388	6.90481	8.28996	8.84165	8.27074	7.80374	8.71325	7.31037	7.76082	8.58183	7.56469	9.28522	8.64388	7.7063	7.9218	7.91759	11.3012	7.67399	7.72852	8.64274	7.63057	7.99914	7.2849	8.28061	9.24373	7.42765	10.0793	7.71918	7.79411	8.53722	7.73838	8.23261	8.57044	7.62845	7.24776	8.01638	7.76931	8.12319	8.88429
RP11-336A10.5	7.51721	6.69281	7.86998	7.98765	6.89016	8.02252	8.71784	7.33973	7.6213	7.89896	6.95955	6.56737	8.45248	7.47929	6.96624	7.21429	8.33465	6.91559	7.08265	7.73413	7.28975	7.64171	7.7613	7.66095	7.94838	7.68907	8.41046	7.17829	6.96084	7.454	7.31189	8.34795	6.96432	8.03753	8.57126	7.24577	8.23201	7.6808	7.10738	7.73555	7.24317	7.41291	8.06234	6.82119	7.0539	7.38057	7.2143	7.8227	8.06025
RP11-620J15.3	9.68611	9.63372	8.55567	8.71005	7.56997	8.73069	8.39137	7.97972	8.74254	8.63951	7.78324	7.39459	8.35086	8.48147	7.16001	10.3799	8.53755	7.66375	8.00541	8.02846	8.5927	9.29869	9.18137	8.96079	8.95414	8.68683	8.86363	9.36135	6.79184	8.77471	8.50554	9.18037	8.1327	8.90026	8.10106	7.40173	8.99002	8.48918	8.46479	8.79792	9.32214	9.12028	9.17949	8.0963	10.1809	8.85121	9.17538	9.71641	9.43364
THAP7-AS1	10.0283	9.4295	10.7227	9.1837	8.93604	8.64196	8.82807	9.16477	9.43123	9.22638	8.74648	7.59995	9.08521	9.53164	7.42742	8.42004	9.48927	8.97989	8.64144	7.86408	9.60536	10.2396	8.79433	9.64343	10.5462	9.60403	9.38513	9.0886	8.83018	8.7637	9.14257	9.28281	9.09879	9.26489	8.25374	8.83374	10.7467	9.12705	9.51058	12.3316	9.57413	9.89629	10.5132	9.02051	9.34043	9.71687	8.35281	8.9718	9.7772
NCK1-AS1	10.222	10.2603	10.6989	9.28577	10.5134	9.90235	9.79074	9.45947	9.08342	11.2871	10.6721	8.60834	9.09899	9.87532	10.1306	10.6812	9.8029	10.4483	8.80022	9.83634	9.76854	9.76407	9.31939	10.4297	11.4234	9.86256	9.57632	10.4036	10.9141	9.79834	10.3393	11.6864	10.7829	10.1749	9.81893	10.1863	9.54453	9.89682	9.10398	10.4905	9.52191	9.88339	10.1915	9.59149	10.1732	10.5585	10.2966	10.0817	10.7909
LINC01278	9.4949	9.78041	9.97508	9.35956	8.28802	9.32939	7.85302	8.64946	8.71427	8.76255	8.86527	7.46331	9.54588	9.40261	7.84348	8.49104	9.80582	9.36888	8.89439	9.73289	9.64315	9.99784	9.81774	9.43794	9.48042	9.71086	8.24203	9.27592	9.11968	9.7659	9.19391	10.2387	7.44523	8.0585	8.2618	7.6164	10.432	9.09935	8.76514	9.38715	9.97657	8.93723	8.94318	9.10864	9.38102	9.41339	10.2596	8.39717	8.73265
CTD-2589H19.6	8.41785	8.3291	8.57222	8.05427	7.65937	10.9714	7.4529	7.41335	8.20835	8.13681	7.51223	7.09172	8.03365	7.73918	8.12113	7.65295	9.05131	8.90056	7.62159	7.94334	7.93276	8.02433	8.15133	8.25535	9.44371	8.01092	8.42351	8.45314	7.58505	7.84479	8.53124	7.86372	7.90219	8.85877	7.76848	8.21585	8.48787	7.26547	8.29212	8.12275	8.69311	7.63218	8.95203	8.34642	7.54184	7.72447	7.8939	8.60135	7.8578
MIR600	7.64769	8.5697	7.70697	7.73851	6.82742	8.04034	7.42904	8.01334	7.77557	8.55384	8.72773	6.74804	9.07258	8.00509	7.44186	8.06093	8.28678	7.70899	7.27659	7.90201	9.42975	7.81671	7.71553	8.18503	8.58576	8.84608	8.09565	9.04912	7.36706	8.60094	9.12445	7.96769	8.21496	8.1258	7.99945	6.90022	7.81778	7.03831	7.98685	7.89585	7.68737	8.11539	7.87365	8.59724	7.8528	9.5571	7.03728	8.32252	8.36353
MIR600HG	7.64769	8.5697	7.70697	7.73851	6.82742	8.04034	7.42904	8.01334	7.77557	8.55384	8.72773	6.74804	9.07258	8.00509	7.44186	8.06093	8.28678	7.70899	7.27659	7.90201	9.42975	7.81671	7.71553	8.18503	8.58576	8.84608	8.09565	9.04912	7.36706	8.60094	9.12445	7.96769	8.21496	8.1258	7.99945	6.90022	7.81778	7.03831	7.98685	7.89585	7.68737	8.11539	7.87365	8.59724	7.8528	9.5571	7.03728	8.32252	8.36353
RP11-264I13.2	8.07818	8.97911	8.93274	7.9867	7.35945	8.86982	8.71337	8.68153	8.83742	8.71138	8.82137	8.35285	9.04717	8.59796	7.39808	8.92474	9.39592	8.72015	9.56927	8.659	9.12905	8.50513	7.96871	10.2776	9.10718	9.05116	8.09625	9.94935	7.60896	9.18869	8.42571	9.07004	7.64626	8.86839	8.73066	7.64036	8.91443	8.22474	10.1573	10.0736	9.32043	9.17077	9.27203	7.62453	8.74595	8.51964	8.278	10.132	8.16841
RP11-264B17.2	8.54729	9.00008	7.88974	8.78336	7.07678	8.14212	7.43034	7.99185	7.76424	8.29412	8.26649	6.62174	8.24598	9.0164	7.15746	8.77779	9.20372	8.64975	7.66917	8.01808	8.77509	7.74734	7.84356	8.34506	8.94596	7.88424	8.54249	8.07394	8.14165	8.55474	8.99798	9.48991	8.73061	7.95407	7.38971	7.60408	7.90598	7.13886	8.88185	8.07307	8.69499	8.57548	8.08046	9.33103	7.60948	8.54703	8.04607	8.90229	7.70363
LINC02154	11.9276	6.80144	7.85336	7.60334	6.72382	11.2289	7.8242	6.94656	7.11953	9.19939	6.87075	6.65554	7.72442	7.62605	6.73688	7.34012	7.59659	6.74506	8.58691	7.32031	7.81996	7.63301	7.67758	7.5606	7.4853	9.74101	8.83685	7.28737	6.54966	8.69481	7.73344	7.9619	6.90426	7.44581	7.27088	6.63126	8.34358	7.41176	8.18032	8.60068	7.58184	9.12987	8.55016	6.85471	7.5863	7.38637	7.13377	8.84506	7.41255
RP4-584D14.5	8.02895	8.5813	8.07809	7.35408	8.26445	8.31634	7.60148	7.69133	8.26072	8.86554	7.65093	6.94185	8.18375	7.97406	8.03483	9.20201	8.20575	8.15229	7.53696	8.53402	9.80163	8.07796	7.66856	8.77702	8.5187	9.57708	8.10514	8.99529	7.7388	8.7811	8.8365	7.89859	7.83793	7.84017	7.48698	8.15484	7.98737	8.47378	8.58046	8.89038	8.48349	8.40906	8.36309	7.5168	8.63306	8.77215	8.23098	8.1346	9.14204
SNHG25	9.00272	8.51687	8.31562	9.00528	8.51103	9.04777	10.3239	7.99929	9.13688	10.9048	8.34667	10.081	9.23224	9.4641	7.41213	8.5149	8.82409	8.15309	7.64504	8.41851	8.06581	8.30232	9.34628	8.68094	8.65022	7.86012	8.8688	9.31593	8.35132	9.0559	9.04125	8.57029	8.53744	9.85246	9.48389	8.43603	8.62054	7.94171	8.53988	8.67683	8.7762	9.56595	8.13019	8.3349	10.4784	7.94329	8.68006	9.07307	9.35189
RP11-311F12.1	7.80355	6.71575	8.35014	7.45829	7.08908	8.85709	7.42326	6.94068	7.13955	7.23374	7.4905	6.81467	8.52853	8.27486	8.5174	7.16016	7.93923	6.97858	7.13292	7.52028	8.30571	7.65478	7.81307	8.3647	8.19149	8.0124	7.41165	7.33664	7.3621	8.04183	9.18588	7.64043	7.44868	7.39496	7.26097	7.06401	7.94905	7.50623	7.9678	7.61706	7.34929	8.11964	8.21382	6.88017	7.02524	7.79782	7.03728	7.41027	8.98792
AC113189.5	9.44156	8.65448	9.24976	8.88268	9.30979	9.37329	9.46195	11.4405	9.46228	9.33717	10.0277	7.99853	9.32254	9.69854	8.94131	8.83262	9.72568	8.85148	9.07426	9.71379	9.83433	10.0379	9.63612	10.1489	10.7102	10.2961	10.2353	9.77356	8.84914	10.5948	10.4008	11.7017	9.35019	10.0555	8.88669	8.56832	10.3077	8.59572	11.2597	9.05913	9.71236	9.59527	10.7021	8.81974	9.52854	9.87321	10.8279	9.40639	10.4485
LOC100996842	9.44156	8.65448	9.24976	8.88268	9.30979	9.37329	9.46195	11.4405	9.46228	9.33717	10.0277	7.99853	9.32254	9.69854	8.94131	8.83262	9.72568	8.85148	9.07426	9.71379	9.83433	10.0379	9.63612	10.1489	10.7102	10.2961	10.2353	9.77356	8.84914	10.5948	10.4008	11.7017	9.35019	10.0555	8.88669	8.56832	10.3077	8.59572	11.2597	9.05913	9.71236	9.59527	10.7021	8.81974	9.52854	9.87321	10.8279	9.40639	10.4485
LINC00638	8.26415	7.7585	8.63694	7.78392	7.18525	8.09455	7.58964	7.43696	7.71066	7.62192	7.42543	6.62657	8.13456	7.89595	6.90572	7.57932	8.17946	6.87053	7.30743	7.55601	7.9775	8.7198	8.74612	8.14657	8.98151	8.63121	7.67721	8.12849	7.49005	8.35752	7.82525	8.31246	7.8792	7.57266	7.19923	7.83586	8.09261	7.95378	8.67371	7.94296	8.30387	8.24476	9.08383	7.34636	7.37547	9.00451	8.18032	7.65703	9.22622
LINC01235	8.4533	6.81574	7.66709	7.41511	7.61204	8.54891	7.7658	7.08183	8.28409	9.29712	7.583	6.56456	8.18754	7.43726	7.90559	7.35003	7.7266	7.50064	8.11658	8.10968	7.82109	8.35115	9.59947	7.95283	7.94447	8.0465	8.82227	7.67515	7.42205	8.10653	7.38712	7.7907	7.38985	7.7248	7.54743	7.21283	8.56833	7.12504	7.29974	7.77736	7.72867	8.22739	8.60138	7.20683	7.11267	8.23927	7.46993	7.43618	7.52863
RP11-705C15.3	8.35804	8.45351	8.89853	8.01678	7.6231	8.46153	7.63129	7.85437	8.81622	8.47272	7.37252	7.39568	8.36584	7.74133	7.40023	8.51586	8.62523	8.1414	7.65835	8.08189	8.9296	8.90971	8.63554	9.0963	8.78697	8.35925	7.5608	8.60895	8.06594	8.2942	8.0188	8.65229	7.99709	8.86624	7.32964	7.28072	8.20143	8.05349	7.72328	8.17004	8.56721	7.93896	8.22177	8.3742	9.39914	8.52601	9.59081	9.19531	8.09287
RP4-594A5.1	7.84541	8.69437	8.39898	7.98639	7.21867	8.10246	7.41123	6.64609	7.01517	7.70654	6.99899	6.50784	8.99886	7.64971	6.5662	8.22581	7.75379	7.93338	6.98464	8.04669	7.84934	9.43107	7.73167	7.58099	8.55746	8.56444	7.4651	8.17286	6.53071	8.05059	8.48279	8.05941	6.96084	7.36078	7.1571	7.46047	9.12849	7.97617	8.04637	8.1793	8.90016	8.22693	8.07616	8.16364	7.9311	7.56251	8.60725	8.39044	7.63653
FAM225B	7.97864	7.85941	7.61945	7.27188	6.8351	8.02676	7.4807	6.69069	7.22991	7.91534	7.20269	6.51786	7.97106	7.71994	6.89037	8.72514	8.01272	7.04072	8.16148	7.90679	8.09193	8.28295	8.56053	7.52696	8.03811	7.92062	8.56938	8.89564	6.61444	8.83787	7.57049	7.46335	7.46495	7.73005	7.50797	6.66721	8.82743	7.1855	7.53195	7.99856	7.60387	8.14085	8.63699	7.47534	8.27196	7.69714	7.42428	8.1786	7.65027
LOC101929427	7.57959	7.19397	7.50878	8.30336	6.72382	7.69963	7.49757	7.10697	7.05428	9.44248	6.94457	6.50784	7.72851	7.42077	6.65984	10.717	7.51974	7.66771	7.07522	7.25138	7.43935	7.35122	7.54085	7.41104	7.43628	8.08312	8.81123	7.19626	6.53071	7.68554	7.39475	7.24679	6.95511	7.40015	7.03581	6.69925	7.71231	6.9455	7.62933	7.87408	7.42602	7.47166	8.43472	6.78849	9.26062	12.3203	7.49076	7.6126	7.56323
RP11-115C10.1	7.57959	7.19397	7.50878	8.30336	6.72382	7.69963	7.49757	7.10697	7.05428	9.44248	6.94457	6.50784	7.72851	7.42077	6.65984	10.717	7.51974	7.66771	7.07522	7.25138	7.43935	7.35122	7.54085	7.41104	7.43628	8.08312	8.81123	7.19626	6.53071	7.68554	7.39475	7.24679	6.95511	7.40015	7.03581	6.69925	7.71231	6.9455	7.62933	7.87408	7.42602	7.47166	8.43472	6.78849	9.26062	12.3203	7.49076	7.6126	7.56323
RP11-458F8.4	8.46365	9.06715	8.68811	8.82901	8.42974	9.52364	8.08939	8.03825	7.98705	7.79861	8.09973	7.39942	8.99141	8.743	8.2065	8.35622	9.16051	8.34088	8.05748	8.15024	9.4708	8.55902	8.16619	9.11568	9.59863	8.03466	8.26152	8.7479	8.993	8.86647	9.70302	9.33168	9.15304	8.52311	8.05628	8.6849	7.97895	7.48401	8.18291	8.2504	10.5215	8.8272	8.76014	8.70091	8.41408	7.94229	8.61815	9.35348	8.31033
CTD-2619J13.14	8.50835	8.03915	8.77359	9.19202	8.90125	8.38212	8.52969	8.46759	8.51495	8.38006	9.39044	7.38479	9.39717	9.23272	8.10052	8.02055	9.28418	8.86639	9.15812	9.06574	9.53388	9.58111	8.95451	9.79223	9.20588	9.24441	9.47725	9.65883	8.87096	8.78445	9.06015	9.06608	9.16446	8.80091	8.63577	9.1647	8.60236	9.01732	9.53869	9.29465	8.58203	9.50199	9.91835	8.3882	8.88478	9.07947	8.3407	8.39966	9.07754
LOC105376114	8.86861	9.09651	9.67686	8.17349	8.0006	8.90028	8.50042	8.71392	8.1133	8.5617	8.45506	7.65589	8.81696	8.59806	8.63689	9.21187	8.69187	7.88884	8.2274	8.29636	8.64134	8.89709	8.95132	8.9872	8.5663	9.94029	8.21976	9.10239	8.48236	8.52049	8.96635	8.53314	8.35908	9.42992	8.06392	8.09799	8.25333	8.28683	8.16637	8.72513	9.06142	8.84377	9.13762	8.10265	8.99172	8.99839	7.59663	8.36788	7.8117
RP11-522I20.3	8.86861	9.09651	9.67686	8.17349	8.0006	8.90028	8.50042	8.71392	8.1133	8.5617	8.45506	7.65589	8.81696	8.59806	8.63689	9.21187	8.69187	7.88884	8.2274	8.29636	8.64134	8.89709	8.95132	8.9872	8.5663	9.94029	8.21976	9.10239	8.48236	8.52049	8.96635	8.53314	8.35908	9.42992	8.06392	8.09799	8.25333	8.28683	8.16637	8.72513	9.06142	8.84377	9.13762	8.10265	8.99172	8.99839	7.59663	8.36788	7.8117
RP11-363E7.4	8.63453	8.01966	9.01548	9.28975	8.49952	8.87648	8.64892	9.12072	8.58679	9.07132	8.92908	6.8445	9.56072	7.79102	8.82506	8.50672	9.16525	8.89669	8.57071	8.64676	9.27212	9.65335	10.7469	9.66053	9.39691	10.5466	9.6493	10.818	9.38292	8.86778	9.55038	8.78351	8.87158	10.174	8.87526	8.85872	8.71	9.34797	9.65204	8.55131	8.167	8.93224	9.21709	8.1117	8.54784	9.29763	8.19048	8.50058	8.71624
LSAMP-AS1	7.85164	9.36219	7.52551	7.27581	6.87031	8.06535	7.48368	6.75677	7.17874	8.1405	6.95859	6.81058	7.76865	7.67654	6.5662	7.29549	7.47433	7.95278	7.42059	7.76053	7.78985	8.18287	8.24832	7.90485	7.82213	8.29528	7.61068	7.59505	6.55347	8.21835	8.30452	8.16252	6.85797	7.34122	7.3377	6.925	8.33586	6.88092	7.46885	8.89569	8.18475	7.59944	9.03972	7.18339	7.35833	8.45524	7.29563	8.35536	7.50605
RP11-597D13.8	7.46451	7.41312	7.59513	8.80495	6.77945	8.387	7.60705	6.74508	7.29513	7.39283	7.12092	6.94479	8.84011	7.53404	6.65846	9.54859	8.09573	8.06078	7.12467	8.0532	8.15634	8.69376	7.61558	7.47572	7.76742	7.8634	7.67815	7.44914	6.55592	8.05809	7.38012	7.53347	7.00114	7.75619	7.29212	7.98824	8.34705	7.58417	7.48513	8.03592	7.31216	7.82561	8.26009	7.22755	7.52917	7.79379	7.51591	8.24513	7.43788
KB-1460A1.5	8.14371	8.46576	7.63628	8.39824	7.04329	8.79538	8.43848	7.62245	7.8051	8.8906	8.17114	7.61641	9.10879	8.06129	7.69082	9.32216	8.40957	7.59506	8.02423	8.55429	8.28232	8.69631	8.78295	8.45271	8.36593	7.88525	8.12159	8.00359	7.45971	8.98705	9.28333	8.3679	7.58471	8.75086	7.4403	7.42048	8.52588	8.37232	7.92733	7.89371	7.87934	8.80004	9.39141	7.5978	8.13658	8.51231	8.66163	8.51156	8.03397
RP11-285F7.2	9.25109	10.2905	9.50576	8.51074	9.39276	9.25662	9.79756	9.56657	9.64036	9.26131	8.66304	8.55982	8.53972	8.69106	8.90863	9.83552	9.21637	9.31217	8.26021	8.92166	10.1381	9.50339	8.85963	9.49284	9.6767	9.28432	8.64822	9.34055	8.95342	10.0779	9.7979	9.78146	9.92636	9.94	9.65866	8.90633	8.79975	8.61971	9.61776	9.44148	9.47072	9.21952	9.87645	8.81495	10.0169	9.69476	9.03648	10.0147	8.90893
LINC00957	8.15624	7.82953	8.38839	8.81184	8.62708	8.87006	8.25321	8.39988	9.48838	7.9383	8.58057	7.29066	9.35998	8.60038	9.1702	9.71346	10.2175	8.79044	9.072	8.71627	9.51921	8.88713	8.20589	8.45578	9.22971	8.52767	9.25204	8.41656	8.27836	8.74857	9.02013	8.86529	7.86211	8.51097	8.56161	9.16922	8.98245	8.48746	8.19539	8.84038	8.30161	9.39478	8.86474	8.3711	8.59553	8.7857	8.66794	8.88499	8.08332
DNM3OS	8.17987	8.97521	7.70999	7.72354	6.79552	8.07884	8.33846	7.49528	8.00191	8.074	7.03116	6.58823	8.61121	7.81138	7.19946	7.96906	8.10196	7.10074	8.01171	8.16919	7.92905	9.10651	8.66811	7.9488	8.34838	7.95134	7.69129	7.42106	6.85646	8.41364	7.92536	7.75419	8.02844	7.81555	7.81336	6.90223	9.41946	7.44128	8.24837	8.35536	8.0984	8.20416	8.58095	7.82574	7.48574	7.94342	7.4043	8.22595	7.54578
TUG1	12.1581	12.7516	13.4038	12.3117	11.3111	12.1857	11.6793	11.9704	12.3158	11.9428	11.7702	10.7069	12.2623	12.9287	11.9591	12.5318	12.6356	12.2949	11.858	12.8544	12.5992	13.2092	12.6892	12.7403	12.5046	12.8123	12.5795	12.3648	11.6506	12.5885	12.4215	12.1805	11.7233	12.0858	12.01	11.6512	12.7478	12.5009	12.9557	13.7929	13.082	12.6603	12.803	11.2366	12.0737	12.6799	12.3993	12.2314	12.5209
HCG16	7.96098	7.98752	8.40347	8.69622	6.98531	8.1414	7.536	7.72055	7.34134	7.20517	7.27369	6.50784	7.89965	8.1896	6.63852	8.45936	7.85467	7.1372	7.63634	8.65873	7.82825	8.47674	7.7005	7.56701	7.95644	7.77693	7.70537	7.82968	7.41635	7.64519	7.47208	7.46494	7.44558	7.84016	7.11721	6.73549	9.18858	8.62545	7.4611	8.08595	8.74982	7.93216	8.6896	9.14512	7.89412	9.99889	8.90267	8.74329	7.53364
RP11-102N12.3	7.91952	7.3059	8.41488	8.03981	7.62614	8.1957	7.54188	7.36675	8.25575	8.04145	7.69797	6.64781	8.53493	8.23851	7.10472	7.78415	8.41611	8.03375	7.40598	7.90376	8.44202	7.86954	9.71948	8.55561	8.81614	8.83077	7.92646	8.13673	7.99638	8.09216	8.34664	8.13067	7.67071	7.48692	7.49461	6.89531	8.57131	7.4432	8.04107	8.36082	8.19877	8.70899	9.18568	7.65566	7.54912	9.1782	7.87402	8.28863	7.48841
RP1-272L16.1	7.72001	6.87409	8.44022	8.94121	7.24283	8.09426	7.46083	8.29444	7.80278	7.74105	8.83023	6.82932	7.91714	7.83166	6.8132	7.19251	7.85544	7.81189	7.57111	7.9026	7.98785	8.99435	7.9505	7.52593	7.58734	7.68849	8.04419	7.17131	7.56499	7.46358	7.52966	8.01581	7.293	7.37319	6.85911	8.13199	8.48945	7.74488	7.09799	7.77261	7.22854	7.655	9.04961	8.10105	7.14028	8.03262	7.19761	7.50316	8.30902
RP11-1149O23.2	8.09036	7.76636	8.62748	8.8358	9.07381	9.02791	9.18071	7.92698	9.6072	9.43044	9.12368	8.7311	8.30756	7.92136	8.9901	8.89669	9.1959	8.3539	9.36007	9.15449	8.93686	8.6866	8.71434	9.14149	8.48087	8.69575	8.78457	8.71103	8.28076	8.88621	8.15616	8.7866	8.81095	9.19856	8.61246	7.90291	8.32924	7.90092	7.81047	8.83434	7.90135	8.31472	8.52973	7.79806	8.93671	9.17111	8.39745	9.42654	7.93261
SMILR	8.76766	7.07625	7.84435	8.03963	6.88628	8.16467	8.60278	7.93304	7.61715	8.28033	7.16803	6.7911	8.13937	8.03855	7.33264	7.15352	7.91758	8.42712	8.13686	7.72274	7.63617	8.45826	7.65901	7.46106	7.53176	7.75837	7.13992	7.13203	8.96892	7.64676	7.79914	7.31932	6.90681	7.63051	7.11785	8.15591	9.344	7.6603	7.3462	8.08272	7.43775	8.27226	8.31654	6.94026	7.18769	7.32333	7.29154	7.68333	7.69312
RP5-1028K7.2	8.07258	7.24079	7.67943	8.92607	6.93286	8.47797	8.5816	8.61214	9.59809	7.2667	7.41202	6.91103	7.95923	8.29558	7.20087	7.29605	8.69451	7.28519	8.11982	8.18186	8.09592	8.22964	8.8547	7.67872	7.99371	7.93548	7.40672	7.52947	6.98881	7.91602	7.48297	8.11383	7.69624	8.25013	7.96404	7.27525	8.60424	6.99959	7.42675	7.94748	7.9816	8.36632	7.83619	7.43418	7.6117	7.76304	7.5216	8.41889	7.54048
DGCR11	8.09765	7.48055	10.0778	8.49085	8.25931	9.26228	8.4756	8.23325	8.95549	8.67893	8.0217	8.19303	8.87819	8.62893	8.06851	8.01275	8.67813	8.62419	9.27189	8.85329	8.00072	9.0028	9.69857	8.81775	8.28919	9.14522	8.33747	7.95914	7.6712	8.22972	8.34149	7.97085	7.8246	8.30076	8.12707	7.39064	9.70818	8.34388	7.98954	8.36445	7.86763	7.99146	9.73839	7.68524	7.62049	8.34997	8.25067	8.69476	8.10095
CTD-2203K17.1	8.21764	6.88069	8.59762	9.09895	7.75393	8.78416	7.37875	7.84621	8.73859	7.93727	7.54087	6.93666	8.30956	9.29526	7.54747	8.38506	9.57209	8.76431	7.36055	7.98743	8.27874	8.39217	8.123	8.59364	8.85349	8.24211	8.09228	8.55647	7.63614	8.54151	8.20173	9.13796	7.40162	8.01806	7.47813	7.33224	8.94332	8.02074	8.29419	8.56951	8.60424	8.8743	9.53055	8.80188	8.81088	7.6061	7.87362	8.21346	7.85904
LINC01270	8.19455	6.8921	8.73937	8.62065	6.82627	8.23773	7.65935	6.94896	7.29772	7.44759	7.23054	6.53223	7.90872	7.96922	6.86618	8.29145	7.8845	7.09485	7.47091	7.57963	7.66687	8.1875	7.76974	7.82691	7.77523	7.78674	7.82889	8.0085	6.66676	7.71389	7.36397	8.48506	7.00239	8.17177	7.09323	7.03135	8.37159	7.27246	7.21568	7.72692	7.42561	8.3574	8.19668	6.9508	8.05817	7.4353	7.28246	8.01714	7.59575
RP11-366F6.2	9.08097	6.66648	7.41893	7.78869	6.72382	7.63781	7.37875	6.64609	6.9972	7.12255	6.84898	6.50784	7.75312	8.16794	6.5662	9.7003	8.44159	6.74506	6.94534	7.65982	7.28686	7.35122	7.49318	7.34871	7.66153	7.58133	8.35258	7.71062	6.53071	7.35681	8.77061	9.55751	6.85797	7.34722	6.83663	6.56669	7.6844	6.8437	8.74433	8.57984	7.40548	9.44347	7.68741	6.7876	6.99868	7.32333	7.03728	7.43219	7.1692
RP3-523E19.2	8.33731	7.68063	7.91122	7.71667	7.31659	8.13382	8.40916	8.16371	7.18245	7.52568	8.24544	6.88977	8.39254	8.67611	7.72249	7.82081	8.60799	8.13984	7.48265	7.99232	8.21264	8.25148	7.49318	7.70402	7.78679	7.85686	7.17973	7.65305	7.76153	8.09285	8.3057	8.42402	8.08603	8.33608	7.25649	7.43818	7.87016	7.13955	7.59403	7.69376	7.77852	7.43762	8.29782	8.3321	8.4233	7.98317	7.26199	8.3971	8.37903
GUSBP11	8.78002	10.001	8.7766	9.06447	8.7397	8.73989	9.03528	8.52761	8.93565	8.48979	8.41804	8.0828	8.23412	9.78549	7.66292	8.8828	9.09707	8.9596	7.91778	8.65654	9.23417	8.40763	8.17467	8.7734	9.29502	8.10602	8.29157	8.41995	8.3259	8.87403	9.27895	9.7901	9.13756	9.12037	8.63551	8.41123	8.29019	7.38007	9.23249	8.58538	9.09995	9.11636	8.45687	8.58656	7.72312	9.28415	9.55324	9.15709	8.49614
AF127936.9	9.22193	7.064	7.53409	8.66313	6.8098	8.1289	7.97309	7.17886	7.61979	7.93369	7.29879	7.19081	8.3154	8.08029	7.39246	7.85521	8.68778	6.98306	7.77921	7.84343	7.68053	9.86726	9.04018	7.89251	7.84844	7.92572	7.90572	7.4168	6.878	8.10436	7.80838	8.22671	7.00315	8.67209	7.04294	6.7945	9.05741	7.71557	9.09809	7.97257	7.34098	7.59768	8.59514	7.10676	7.4198	7.58514	7.67437	8.02183	7.84365
RP11-96H19.1	8.55173	7.47662	8.5202	8.67556	7.3103	8.58091	7.60598	7.29364	8.70366	7.47488	7.80619	6.96459	8.65379	7.98858	8.91515	8.6017	8.25799	7.35407	8.04678	8.08468	7.94024	8.54688	8.12719	8.64553	8.79718	8.24301	7.64036	8.39445	7.72544	8.05931	8.19667	9.03429	7.02154	8.68562	7.49957	7.25325	8.85138	8.20891	7.84877	8.22621	8.02165	8.83585	7.97812	7.70087	8.01344	7.79766	7.6691	8.45696	7.63211
LINC01764	8.71105	6.76375	7.71958	9.48505	6.92974	7.9315	8.24459	9.55874	8.00884	7.33176	7.8233	6.76243	8.07788	8.05666	6.73591	7.23145	8.11317	7.16873	7.17482	7.61935	8.09755	7.35122	7.62891	7.437	7.76845	9.36635	10.5521	7.21602	6.97936	8.7138	8.74619	7.50071	8.05346	7.75318	8.50388	6.84138	7.82953	7.43478	7.37113	8.68253	7.69319	8.78916	8.82281	7.57434	7.11009	7.40974	7.17632	7.40709	7.4402
RP11-282O18.3	8.86857	9.08031	8.93456	8.10978	7.73881	8.11951	7.54695	7.97141	8.16672	8.26888	8.31967	6.86802	8.96538	9.02112	8.20456	8.68384	9.25578	8.27596	8.4332	8.88267	9.12216	9.05266	8.77078	9.6497	9.36603	9.35094	9.81938	9.00018	7.67802	8.68278	8.60276	8.32925	8.73466	8.24643	7.90622	7.60598	9.03032	8.85813	8.91699	8.8168	9.01289	8.70921	9.31485	8.34837	8.25557	8.96649	8.70871	9.10664	8.4392
RP11-108P20.3	8.18269	8.44537	8.45561	8.24465	8.62236	9.35653	9.45437	8.00524	8.83811	8.62277	8.35245	8.77703	8.70942	8.28724	7.68389	8.74009	9.06298	8.04985	8.1086	8.47665	9.05529	8.92185	9.46717	8.62157	8.63652	9.38671	8.7726	9.20369	7.46936	9.47471	8.46691	9.70707	8.60104	10.1025	8.4293	8.89692	9.00805	8.56537	8.17903	9.17987	8.6311	8.8866	9.40082	8.46852	9.50893	9.0143	8.32462	9.23172	8.17646
LINC01929	7.89208	9.68272	7.45823	7.40134	6.87022	7.786	7.65575	6.75285	7.03332	7.89383	6.89144	6.67416	8.31055	7.6384	7.22487	7.27354	7.57029	6.85376	8.10996	7.84271	7.40994	9.24758	8.07743	7.69469	7.49625	7.62023	7.94652	7.13203	6.82236	9.23507	7.39975	7.49221	7.19933	7.53885	6.962	6.57746	9.08196	7.0515	7.19518	7.6411	7.24334	7.77445	7.82725	7.61925	7.1084	7.45194	7.11674	8.25397	7.60232
BX470102.3	8.09782	10.1522	8.92303	7.95234	8.04604	8.19704	7.54736	7.90624	7.56564	7.28237	7.26136	7.35602	8.07623	7.6861	7.21147	8.31593	8.31839	7.37871	7.20625	7.53821	9.01847	7.9193	7.6338	8.50667	8.92681	7.6452	7.59358	7.38971	7.27478	7.95507	9.11124	7.86581	7.90526	7.3803	7.42247	7.12642	8.12095	7.99461	9.11166	9.03558	8.41441	9.05814	8.01427	8.55294	7.65182	8.94665	7.30228	8.27253	8.44294
CCDC144NL-AS1	9.63689	7.06566	7.55515	9.65637	6.77464	7.69789	7.40476	6.79653	7.1511	7.16719	6.89977	7.29873	7.85507	9.53162	6.72132	7.66044	7.73625	6.80643	7.06176	7.76884	7.45404	7.60865	7.62444	7.56982	7.71214	7.65918	10.542	8.73652	6.64641	7.66987	7.86141	9.38708	6.93946	7.41815	6.93727	6.61723	7.91076	7.00215	10.2552	7.58742	7.37387	9.30681	8.88692	9.00613	7.35005	7.38726	7.32681	7.7222	7.5445
LOC105369205	9.63689	7.06566	7.55515	9.65637	6.77464	7.69789	7.40476	6.79653	7.1511	7.16719	6.89977	7.29873	7.85507	9.53162	6.72132	7.66044	7.73625	6.80643	7.06176	7.76884	7.45404	7.60865	7.62444	7.56982	7.71214	7.65918	10.542	8.73652	6.64641	7.66987	7.86141	9.38708	6.93946	7.41815	6.93727	6.61723	7.91076	7.00215	10.2552	7.58742	7.37387	9.30681	8.88692	9.00613	7.35005	7.38726	7.32681	7.7222	7.5445
CTD-3010D24.3	7.5776	7.90982	7.43658	8.1667	9.48111	7.88668	7.78855	7.32255	8.11684	8.38228	8.74525	7.45517	7.80102	7.21327	8.29865	8.40935	9.02651	8.10912	7.36819	7.64052	7.87255	8.36269	7.57056	7.77101	8.28288	7.69127	8.22723	7.53719	8.00972	7.71927	8.34459	8.83384	7.78362	8.47302	9.16531	9.14106	8.01813	8.63298	7.27225	8.01289	9.54102	8.62366	7.84466	7.95702	7.79971	8.57766	8.09577	8.85641	7.1692
MNX1-AS1	8.87608	6.81681	8.48926	8.30728	7.18985	7.73553	7.37875	6.67797	6.9972	7.65822	7.03352	7.10098	7.6939	8.35159	6.5662	7.08905	7.53658	7.17741	7.20161	7.52843	7.48083	8.42319	7.7796	8.54915	7.61163	8.09502	7.33547	8.34005	6.97176	7.90218	7.86141	7.70691	7.5505	7.31495	7.09186	7.48783	9.24115	6.98963	7.11843	7.62048	9.4712	7.25845	7.62438	7.86577	10.7971	7.38234	7.30861	7.91702	7.2692
LINC01508	7.40347	7.74623	8.52377	7.43784	6.82151	8.18922	7.37875	7.04641	7.5402	7.25086	6.84898	6.50784	7.66289	7.18507	6.89814	7.54098	7.52442	6.84011	6.96733	7.26487	7.55796	7.49546	7.49318	8.8435	8.03318	7.61994	7.10317	9.10166	6.69737	7.80039	8.36696	8.39263	6.85797	7.71732	6.83663	6.60898	7.83105	6.8437	7.83616	7.78098	7.94547	7.27581	8.09298	6.87965	7.30002	7.36969	7.31038	7.43629	7.50657
RP11-53O19.3	8.48	8.62724	9.30402	8.45655	9.21881	8.81724	8.04619	8.39957	9.08967	8.77117	8.69977	9.707	9.22341	8.0809	8.92813	8.28553	8.76694	8.30386	8.1241	9.47062	9.28132	8.97878	8.3708	8.88618	8.8911	9.2266	8.22268	9.67282	9.27787	9.06206	8.88905	9.51874	9.43655	8.95776	8.45256	8.85833	8.68279	8.47874	8.13571	8.88377	9.21802	8.8911	9.89674	9.60724	9.16282	8.89866	8.31595	8.80388	8.70653
RP11-585P4.5	8.76774	8.32097	8.59197	8.46857	8.73087	8.93635	8.28032	8.1847	8.58104	9.75351	8.63942	8.3299	8.03607	8.27196	9.17673	8.55624	7.71764	8.61749	8.4012	8.01413	8.1499	7.67136	8.81797	8.16768	8.28518	9.17953	7.45424	10.899	6.76283	8.30044	9.42498	7.38057	7.72109	8.94304	8.09212	8.91849	7.99999	8.65846	8.28763	8.3394	8.70367	9.81212	8.86284	7.50894	9.30725	9.04797	7.54972	9.29332	8.77029
RP11-672A2.4	7.72819	7.50851	7.74733	7.57001	6.89873	7.81843	7.37875	6.8463	7.57624	7.68081	7.13014	6.50784	8.62769	7.38522	7.47312	8.11234	8.16888	7.13994	8.16927	8.15262	8.28763	8.31856	7.99445	8.21989	8.31427	8.12298	8.47531	7.71165	6.71514	9.65098	8.25493	7.78815	7.24733	7.41768	7.03147	6.82233	8.84596	7.67809	8.15216	8.02999	7.79309	7.88839	8.56306	7.23941	7.52799	7.60501	8.17478	8.43813	7.34645
AJ271736.10	9.62628	9.68949	9.22931	10.7744	9.35393	10.1401	11.962	9.03052	10.148	9.11167	8.40557	10.0098	9.91764	9.6484	8.03733	9.96377	9.95049	9.00106	9.60602	8.84991	9.49764	9.71109	9.66467	9.37442	10.4448	9.5712	9.5693	10.1437	8.97363	10.0862	8.88222	10.1812	9.46393	9.74313	9.6659	8.39193	9.57526	8.99934	10.7428	9.87323	10.5143	10.6443	9.54933	10.7845	9.6064	9.52928	9.96799	10.1216	10.0764
AC097713.3	7.40347	9.63076	7.50083	7.25735	6.72382	7.63781	7.43133	7.10513	7.05498	10.2912	6.84898	6.50784	7.71981	7.15146	6.5662	10.0003	7.52912	6.79749	6.94534	7.28686	10.0998	7.3867	7.49318	7.83212	8.0405	9.15069	7.10317	9.76669	6.58261	7.85658	7.92479	7.22317	6.85797	7.38892	6.8731	6.57996	7.6844	7.49455	7.53121	7.75459	8.12527	7.40266	7.7905	6.75054	8.23936	7.32333	7.03728	9.61703	7.1692
RP11-802F5.1	8.41233	7.0077	7.88458	8.27308	7.28364	7.71972	7.74278	7.13321	7.15689	7.6601	7.01164	6.78885	7.74759	7.73391	6.5662	8.36815	8.35345	7.64995	7.47169	7.39607	7.40069	8.41295	7.67076	7.78156	9.06671	7.68864	11.2646	7.26769	7.01101	7.62544	10.1692	8.30113	7.31961	8.0572	7.18797	6.83111	8.04677	7.20639	7.60108	8.82237	7.47184	7.52887	7.94597	7.10339	7.1339	7.48508	7.16951	7.80721	7.81353
RP11-164P12.4	10.2356	8.11112	9.72159	10.1343	9.62249	10.8991	11.2746	9.52484	9.02042	9.93091	10.3211	9.71276	10.5096	9.43939	10.1261	9.64135	10.4202	10.0259	10.4267	9.43482	10.109	10.5768	9.94435	9.69677	9.78519	9.84436	8.95652	9.39437	9.97396	9.20228	9.07165	9.42214	9.29849	9.68707	9.70348	10.2512	9.80549	10.1481	9.48367	9.92156	9.36221	10.0013	11.2268	8.50147	9.8527	10.0443	9.49051	9.90839	9.53176
RP11-739L10.1	9.26908	7.3524	8.38196	8.01614	7.50825	8.33763	7.56622	7.12667	7.20753	8.93929	8.00101	6.63235	7.82513	7.88097	6.82794	9.1556	7.75944	7.36489	7.35646	7.27215	8.70261	7.80948	7.6497	8.03189	8.74493	8.23064	7.94111	8.05601	7.01215	8.01991	8.22437	9.14546	7.2731	8.15574	7.50624	9.29565	8.05493	7.2258	8.674	8.76716	8.53319	8.07551	7.83425	7.29483	9.15722	8.40613	7.7227	8.03259	9.81589
RP11-1100L3.8	9.4565	9.82233	7.51379	7.81025	8.05017	8.70158	7.71118	10.1367	8.43794	8.56025	7.69296	7.2185	9.09259	8.05086	7.28079	8.01695	9.17783	7.4111	7.40363	7.50089	8.23524	7.35122	7.49318	7.73354	8.59495	7.58133	7.28229	7.13203	8.37382	8.33183	7.66266	7.6802	9.92914	7.90839	9.04449	7.77145	8.40776	7.20046	9.27459	7.65717	10.9106	8.9863	8.40471	7.32694	6.99868	8.17389	7.32768	7.96226	7.1692
LINC00680	9.50362	10.0342	9.80901	9.16478	8.85611	9.66255	8.17595	7.97635	8.80157	7.96305	8.60627	7.49137	8.78911	9.35422	7.90567	9.05569	8.8217	8.13963	8.57366	9.86933	8.95213	9.2648	9.1363	8.45162	9.05815	8.81215	8.7287	9.39169	8.23319	8.9589	9.21023	8.20607	8.2154	8.97442	8.3878	8.63208	9.11097	8.16477	8.97075	8.94965	9.18249	8.9884	9.03766	9.17771	7.52572	9.9549	9.38526	8.43883	9.21619
CTA-989H11.1	8.82418	8.19015	10.3101	8.75966	9.07235	9.59242	8.86639	8.27888	8.53429	8.77459	8.28221	8.72847	8.7549	8.01765	8.36419	7.78821	8.62979	8.65198	8.10522	9.69286	8.64855	8.71328	8.62102	9.24041	8.88097	9.06768	8.81853	8.93141	8.60742	8.85251	9.08201	8.28187	8.39214	9.30188	8.45525	9.67717	8.41106	8.74031	8.17253	9.29849	8.83301	8.5488	9.22604	8.09266	7.60371	8.28362	8.44522	8.48094	10.3443
SNHG7	10.5008	9.09898	9.72575	10.1975	9.41913	10.7823	9.81199	9.42409	10.0737	9.89104	9.20407	10.316	10.0751	10.6986	9.88026	9.69494	10.0811	9.65695	10.1398	10.3535	9.97263	10.3004	10.2181	10.5049	10.117	8.8068	10.4754	10.4054	9.75053	10.0104	10.6719	10.7376	9.71786	10.9904	10.997	10.5011	9.09622	8.4977	10.1796	9.29615	8.52008	10.1455	9.04602	9.80683	10.1286	10.2919	10.0326	10.4177	10.1839
LINC01003	8.3183	7.73247	9.21074	8.30326	8.83564	8.49923	7.96051	8.61958	8.50416	8.82289	9.52753	8.44065	8.94728	7.80822	8.34031	8.46017	8.6928	9.06102	8.31498	8.51699	9.79394	9.70435	8.62078	9.16165	8.87369	9.6798	8.27333	9.34792	8.91277	8.87256	8.49775	8.8957	8.53908	8.95274	8.51218	7.98354	8.62969	9.78747	8.50385	9.16043	9.22375	8.94097	9.33356	8.29118	9.83012	9.00051	8.72804	8.75154	8.47241
RP11-526I2.5	8.02123	8.72091	8.21215	7.86935	7.39891	8.88863	7.56687	7.33898	8.0972	8.10307	7.98338	7.51231	8.85826	7.86044	7.35676	7.27268	8.46867	7.97428	7.67391	8.07965	8.8932	7.70233	7.72936	8.84995	8.59594	8.77034	7.72793	7.73521	7.72584	8.12393	9.38615	8.30751	8.30807	8.50598	8.38407	7.63743	7.90724	7.80319	8.95701	8.35093	8.82452	8.1504	7.95127	7.70773	7.59892	8.67262	7.74266	8.19607	7.68912
CTC-573N18.1	8.32972	7.13758	7.60258	7.54354	9.53309	7.63781	8.40395	6.84054	7.67054	9.25651	7.01083	7.17872	7.81634	7.40068	6.6784	8.31219	7.59258	6.78182	7.15562	7.28264	7.38986	7.53886	7.85343	7.34871	7.51867	7.58133	7.18398	7.93964	6.76638	7.47652	7.61393	7.36007	6.97433	8.72134	7.55273	6.60859	7.9191	6.96758	7.10302	7.93302	8.23962	7.89262	7.62438	6.86651	8.81096	8.28536	7.69632	9.51431	7.1692
LINC00944	7.74178	7.80919	8.00313	8.20759	6.7989	7.89062	7.56096	6.95467	8.14772	7.69303	7.07346	7.20228	7.76238	7.08187	7.49005	8.28802	7.95489	7.76009	7.48998	7.60011	7.50794	8.33043	8.73875	7.48168	7.59483	7.61467	8.31041	7.30721	7.11615	7.64479	7.29842	7.22317	6.92108	8.18879	7.18809	7.31059	7.84441	7.38988	7.03079	7.54222	7.27295	7.68531	7.85859	7.27891	8.70236	8.7436	7.17385	8.60261	7.21331
Z83851.4	10.07	9.87143	11.7927	9.09335	9.04278	9.80371	8.90016	9.28722	9.46885	10.1098	8.98846	9.07195	10.0588	9.14962	9.33698	8.41537	9.83407	9.52869	8.9965	10.1798	9.68382	10.0878	9.31821	9.96121	10.2386	10.0509	9.57908	9.46066	9.85981	9.4631	9.82275	9.34969	9.845	9.74138	9.15034	10.191	10.5456	9.96617	9.47365	9.915	9.92417	9.38688	10.4299	9.52484	8.14722	9.14475	9.07269	9.27633	9.65833
RP11-159F24.5	8.23579	9.62645	8.00516	8.5956	7.92289	8.06751	7.54074	7.09132	7.4445	8.31821	7.70127	7.06592	8.53466	8.51366	6.85089	8.23542	9.12458	7.39503	7.61335	8.22591	8.31642	8.90059	8.20794	8.38925	8.19635	7.75971	8.51504	8.23391	8.45646	8.30117	8.65847	9.13475	7.97341	8.68815	7.6202	8.2669	8.3578	7.44768	8.50662	8.29283	8.23507	8.51156	9.47378	7.98408	7.59451	8.12507	7.03728	7.81961	7.75813
FAM157C	8.14472	8.03575	8.0453	7.73835	7.72768	8.09316	7.53727	7.68446	7.48927	7.79021	7.39558	6.585	7.8857	9.25417	7.30712	7.84447	8.90792	9.78752	7.74173	7.50524	9.12927	7.85839	8.08277	9.33005	9.07457	7.9375	7.57485	9.00268	8.36422	8.3642	9.10256	9.82599	7.95538	7.79984	7.67133	6.94949	7.85312	7.16024	8.85397	8.39843	8.29894	8.90741	8.60957	8.48106	7.4643	7.78226	8.20826	7.67594	7.61645
SH3RF3-AS1	7.90042	7.57023	7.82757	8.14033	7.1616	8.19072	7.65147	7.15097	7.51633	7.77805	6.98781	6.57589	8.42709	7.66355	6.85921	7.79003	8.17005	7.12191	7.84522	8.05611	8.14471	7.89758	8.39297	8.58513	8.479	8.09475	7.86722	8.1639	6.99782	8.4913	7.94104	7.57909	7.33985	7.41758	7.25884	6.64972	8.88966	7.19529	8.37127	8.18699	7.83185	8.25491	8.66723	8.01779	7.7476	7.75874	7.75074	8.04976	7.89333
ZNRD1ASP	8.56751	7.45702	7.94611	8.26427	7.29152	8.58264	7.60137	7.61635	8.38537	7.24416	7.23717	7.5196	8.38241	7.42204	8.03808	8.67439	8.46301	7.38699	7.75243	7.69544	8.10053	9.30958	9.91385	8.25456	8.73147	7.76319	8.2584	8.07891	7.30773	7.89851	7.94468	8.02059	7.7456	8.96522	7.43783	6.99667	8.08032	7.27827	7.22898	7.54505	8.2755	8.30107	8.72021	7.86386	7.8936	8.34743	8.45808	7.94266	8.00809
RP11-1C8.7	8.34182	7.73021	7.9506	7.74693	7.03471	7.95302	7.61359	8.57154	7.29794	7.12255	7.23549	6.55952	7.66289	7.12871	7.5712	8.9396	7.80232	6.86691	6.99399	7.24654	7.24231	8.63931	7.49318	7.78789	8.60071	7.78562	7.28099	7.14015	7.05533	7.7015	7.27173	7.67655	7.15322	8.11723	7.10762	6.6143	7.94944	6.8437	7.10341	7.96816	7.94531	7.34657	8.08176	6.75054	7.38508	8.05895	8.21377	7.92363	7.57526
RP4-647J21.1	7.66611	7.267	7.97578	7.75966	7.28003	8.57969	7.37875	6.96745	8.83262	7.37075	6.93569	6.72464	8.2732	8.00803	7.65983	7.75145	8.28822	7.53867	7.54581	8.65912	8.22721	7.70541	8.08215	7.96673	8.23627	8.24951	7.98323	8.06559	6.58441	8.40474	7.83724	7.6181	7.68214	8.61397	8.10474	9.26455	8.37169	7.71711	7.4002	8.49023	8.08395	8.42952	8.27411	7.59206	7.8577	8.24867	7.78844	8.6094	7.49914
MAP1LC3B2	7.62796	9.18403	7.46143	7.47106	6.72382	7.66452	7.37875	7.1221	7.32964	8.11652	6.84898	6.51313	7.70679	7.87618	6.5662	9.06423	7.80658	6.84924	7.12333	7.26652	7.52463	7.35122	7.62997	8.95406	7.78191	7.80599	7.22951	7.56713	6.53071	8.66169	7.41049	7.55119	6.89095	8.153	6.83663	6.65742	7.80654	6.8437	7.31439	7.32499	7.40613	7.53641	7.96556	6.75054	9.29358	7.96663	7.07223	9.23659	7.68424
ASH1L-AS1	8.75234	8.77247	9.42447	9.11394	9.20905	9.27938	8.11891	9.08596	8.87407	8.5935	8.75701	8.25166	8.57266	9.5692	7.82022	9.06269	9.05151	8.8882	8.55355	8.18607	8.99024	8.29254	8.25407	8.94651	8.85877	8.76032	8.37996	8.88083	8.90232	8.59608	9.31862	9.69786	8.21946	9.23644	8.36827	7.62629	9.31212	8.33292	8.70686	8.8541	8.85217	9.45435	8.72933	8.79865	8.35953	8.90665	8.4204	9.43645	8.22387
LOC100288748	7.51382	7.71787	8.16855	7.82036	7.62259	8.08368	7.67195	7.98778	8.07387	7.82321	7.57188	7.46842	8.5439	7.64368	6.77629	8.06671	8.45045	7.97201	7.46974	7.60341	7.95213	8.48343	7.6849	8.40744	9.14225	8.49526	7.55971	7.81759	8.09532	7.69326	8.39086	8.65383	7.9582	8.32013	7.86569	7.36825	8.02383	8.0327	8.24409	8.53536	8.55237	8.7229	8.08521	7.86812	8.6801	8.34742	7.72266	8.23083	8.01635
RP11-22C11.2	7.51382	7.71787	8.16855	7.82036	7.62259	8.08368	7.67195	7.98778	8.07387	7.82321	7.57188	7.46842	8.5439	7.64368	6.77629	8.06671	8.45045	7.97201	7.46974	7.60341	7.95213	8.48343	7.6849	8.40744	9.14225	8.49526	7.55971	7.81759	8.09532	7.69326	8.39086	8.65383	7.9582	8.32013	7.86569	7.36825	8.02383	8.0327	8.24409	8.53536	8.55237	8.7229	8.08521	7.86812	8.6801	8.34742	7.72266	8.23083	8.01635
HLA-F-AS1	8.27622	7.8269	8.83028	8.87169	6.99916	8.2579	7.69565	8.43086	8.07727	7.37018	7.81329	6.83613	8.34403	8.33505	6.66286	8.48764	7.81998	7.66329	8.73608	8.71882	8.10165	7.63845	8.87459	8.02306	7.83939	7.90196	9.07174	7.9927	7.71992	8.3642	7.80179	8.67228	7.10847	8.39104	7.51592	7.1721	8.31143	7.03506	7.69323	7.8519	8.38604	8.253	8.40804	7.86296	7.81609	8.45879	8.20033	8.38712	7.8707
RP11-499F3.2	7.94709	8.4125	7.92869	8.26319	8.2996	9.29014	8.03834	6.91059	7.15475	7.67043	6.90983	6.56925	7.74716	8.23932	7.40121	9.11951	7.51205	8.04889	7.61823	7.52322	7.87686	8.45645	8.07846	8.39829	8.24591	8.00278	7.46994	7.67497	6.56892	8.0969	9.41157	8.12045	7.30882	8.14144	7.57203	6.71013	8.48839	7.20814	9.16222	8.39915	9.12082	8.83609	8.20938	8.58085	8.19452	8.08497	8.00849	8.30111	8.08939
RP11-680H20.2	7.40347	7.90743	7.4406	7.85656	7.15915	8.0722	7.5017	6.71408	7.26203	7.91929	6.84898	6.50784	7.68528	8.5664	6.62916	7.35577	7.76692	7.14104	7.50238	7.32698	7.24231	9.05079	8.93672	8.96196	7.69047	7.63784	8.13432	7.68813	6.6098	7.73881	8.33367	7.40441	6.85797	7.4819	6.85859	6.64267	7.6844	7.07729	7.12867	7.48068	8.98937	7.72687	8.67309	7.63654	7.05985	7.55704	8.87805	7.84972	7.18821
RP11-122K13.12	8.83079	7.98964	7.74399	8.59309	7.39969	8.38665	7.66407	7.82425	8.11368	7.68723	7.72584	6.52448	8.23104	9.33596	7.47331	8.47417	8.8552	8.51652	8.19892	8.13874	8.72403	8.11	7.7285	7.96599	8.51223	7.7659	8.52092	7.94066	7.86739	9.12845	8.23109	8.88912	8.01511	8.21292	7.58595	7.52339	8.2375	7.22399	7.82718	7.87082	8.32915	8.63046	8.06153	7.89745	7.71741	8.41463	8.17604	8.87181	7.73975
RP1-122P22.2	7.70044	8.05893	8.38642	8.32812	6.75461	7.89144	7.37875	7.49323	7.45796	7.80023	7.96097	6.68329	8.69028	8.02531	6.7941	8.25886	8.51423	8.62248	7.81669	8.78538	8.14589	8.53947	8.267	8.16135	8.56706	8.56586	8.12848	7.48316	8.38868	8.47078	8.24825	8.064	6.99382	7.81839	7.58393	7.59044	8.60458	7.89938	8.38017	8.33731	7.7339	8.14133	8.42473	8.06161	7.57861	8.33066	8.79258	7.72112	7.85109
LOC101929243	9.28304	9.95569	10.5753	9.68015	9.60778	9.78079	10.5005	10.4165	9.93379	9.64961	10.4281	9.60627	9.17321	9.36917	8.08979	9.03677	9.08931	9.02795	9.05966	9.32201	9.35198	10.9391	9.53506	9.92479	9.75506	10.3642	8.9586	9.478	10.1063	9.41376	9.98295	9.06463	9.72957	9.70244	9.17459	9.6614	10.4954	9.60988	8.45307	9.13776	10.1176	10.4791	10.3933	10.2711	10.7805	10.1191	9.65096	9.88991	9.8065
RP11-140K17.3	9.28304	9.95569	10.5753	9.68015	9.60778	9.78079	10.5005	10.4165	9.93379	9.64961	10.4281	9.60627	9.17321	9.36917	8.08979	9.03677	9.08931	9.02795	9.05966	9.32201	9.35198	10.9391	9.53506	9.92479	9.75506	10.3642	8.9586	9.478	10.1063	9.41376	9.98295	9.06463	9.72957	9.70244	9.17459	9.6614	10.4954	9.60988	8.45307	9.13776	10.1176	10.4791	10.3933	10.2711	10.7805	10.1191	9.65096	9.88991	9.8065
RP11-686D22.4	7.89797	7.87199	8.68067	8.00686	7.3723	7.99857	8.23932	7.93919	7.97523	8.04084	7.47756	7.58236	8.21908	7.46555	7.27635	7.85942	8.34811	7.45296	7.69475	8.31024	8.46581	8.49571	8.82725	8.01804	8.12673	8.47309	7.97326	9.0984	7.71024	8.29833	7.58363	7.44269	8.38364	8.6862	8.51049	7.27561	8.12349	7.31791	8.11161	8.40942	7.58668	8.19626	8.64641	8.63989	8.33933	8.38874	7.69155	8.61292	8.06172
LINC02014	7.46594	6.92028	8.95038	7.48043	7.33874	8.66658	7.37875	7.33463	7.32409	7.20877	7.57892	6.76991	8.01552	7.75907	6.95678	8.74053	7.70783	8.43661	7.04136	7.69502	8.27223	7.77762	7.58905	7.57658	10.5244	8.17194	7.36391	7.51361	8.09453	7.93396	8.26119	8.06297	7.39404	7.62045	8.27763	6.8487	7.79231	7.67185	7.49744	8.23629	7.50904	8.06368	7.93289	7.17428	7.43501	8.10458	7.48899	7.66929	7.46626
AC002467.7	8.38351	8.82516	9.13583	7.60271	8.49054	9.0988	8.73818	9.13716	8.01709	8.83356	9.63398	8.37067	9.58754	8.72049	8.51648	9.79338	9.21683	8.92631	8.59685	9.36694	9.37401	9.69311	9.05261	9.26685	9.80797	10.3011	8.86535	9.68907	8.92029	9.22576	9.2612	8.94835	8.92892	11.0774	8.69852	9.17369	8.61821	8.13449	8.646	9.43507	8.76507	8.7844	9.50188	9.16921	8.94414	8.73055	8.55148	9.93856	9.3145
CTC-444N24.11	9.46751	9.88692	9.24264	10.3064	9.61423	10.1997	10.5202	9.39502	9.69008	9.5589	10.1103	10.8565	10.0447	9.48072	10.029	9.73956	9.8476	10.1436	9.47963	9.76856	9.33024	10.6601	10.3124	9.88527	9.48157	11.5318	9.65829	9.66226	10.2979	10.2716	9.73287	9.34026	11.099	10.6973	10.0977	10.2262	9.88331	9.62064	9.55338	10.2559	9.64774	10.5237	10.7549	9.6749	9.60392	10.0474	9.60624	9.90477	9.33565
DGCR5	7.69417	8.87031	7.6582	8.35835	6.7884	7.83202	7.44986	6.97107	7.11985	7.3642	7.12603	6.67203	7.711	8.17489	6.95166	7.94159	7.61498	6.82527	7.01401	7.52144	7.39194	8.34642	7.49318	7.88515	7.96297	8.09554	7.4958	7.47389	6.57498	7.65358	7.67773	7.47646	7.79569	7.45993	6.91209	6.79352	7.84834	6.93518	8.2718	7.77417	8.10502	7.44238	9.03804	7.51446	7.05168	7.47812	7.14377	7.61846	7.40218
CTD-2066L21.2	9.80068	6.65749	8.04197	7.2537	6.72382	9.30956	7.37875	6.75991	7.35748	7.12255	8.15204	6.50784	8.67725	7.3497	6.5662	7.03912	7.93158	7.06792	9.14851	7.28079	7.62862	7.55658	7.49318	7.49897	7.43628	7.62953	7.36657	7.20177	6.66808	8.58055	8.30116	8.10417	7.32435	7.31495	7.02792	7.74899	7.86584	7.47975	7.22193	8.24619	7.2826	8.04379	7.84518	8.92716	6.99868	7.62113	7.03728	7.40811	8.49735
LINC00704	8.06615	6.79184	7.68886	8.07778	8.84256	9.47945	8.08616	7.60513	7.6459	7.64934	7.77402	8.5214	7.99692	8.01821	10.0053	7.0723	7.94911	7.11822	7.542	8.49378	7.45851	8.80834	8.49093	7.57817	7.57665	7.69538	7.43946	7.35198	7.92793	8.7462	7.31048	8.13675	8.62952	7.98075	9.22772	6.88867	10.7911	8.42646	7.08074	7.98986	7.18214	8.02716	7.8568	6.93832	7.06009	8.29001	7.13531	7.53658	7.50039
RP11-589P10.5	8.9386	8.20411	8.08326	8.0928	7.57625	8.88461	9.69187	7.58164	8.87231	7.61188	8.21213	7.15656	8.68938	8.63299	7.61991	8.07544	7.96554	7.65521	7.7374	7.89271	8.49879	7.93516	8.31019	8.03091	8.18812	8.18466	8.09693	8.56975	7.47856	8.39827	8.11495	8.679	7.83572	8.54569	7.9073	7.20612	8.53077	7.8226	8.14008	7.9977	8.59449	8.15692	8.16067	7.83379	8.42192	8.98935	8.21521	8.22888	8.78636
RP11-686O6.2	7.9852	8.23211	8.52571	8.94906	8.57914	8.77943	8.23043	8.6663	8.53829	7.95651	8.68841	7.90045	8.69949	8.02763	7.05372	7.74189	8.58235	7.60971	7.78804	7.76253	8.08293	9.25441	8.07809	9.24153	8.50399	9.35931	7.96344	7.8743	8.45902	8.26631	9.10738	7.86179	8.17018	8.42787	8.20054	8.23546	8.96563	8.22644	8.41416	8.64461	9.3959	9.16537	8.47793	8.10433	8.9484	8.15708	8.17091	7.69616	8.82255
YTHDF3-AS1	7.6224	7.6933	9.07646	8.8986	7.59026	8.43018	8.73886	8.54366	8.77293	8.13326	8.43299	7.67426	8.82576	8.97568	7.41003	7.77584	8.18091	8.2104	7.94468	7.68842	8.10638	8.92431	8.5634	8.29815	8.41478	8.05345	8.36654	8.08224	8.1253	8.00812	8.15379	8.37863	7.84826	8.18172	8.04884	7.40691	8.81815	8.03749	7.66307	8.97351	8.26794	8.97842	9.49888	8.0215	9.61862	8.1248	8.37831	8.12218	8.32866
RP11-337C18.10	9.00608	9.0838	10.1174	8.67301	9.01344	9.24722	7.83945	9.09034	8.69396	8.41337	8.38676	7.04455	9.14604	8.61771	9.10704	9.5356	9.63513	8.51272	8.40939	9.10606	9.37408	9.50329	9.27313	8.93836	9.0084	9.52705	8.97568	9.52014	7.87135	9.07969	8.95177	9.17606	8.63426	8.13162	8.40434	8.79753	9.38513	8.96192	9.22574	9.20087	10.0465	8.88948	9.56016	9.11389	8.08777	10.1345	9.48607	9.3363	9.17312
RP11-661A12.4	8.61986	7.21704	8.27989	9.35709	7.18442	8.29155	7.76077	7.76972	7.64917	7.98987	7.13927	6.50784	8.85382	8.23108	7.35625	7.30241	8.60332	7.03327	7.5915	7.62933	7.90125	8.32853	8.82785	8.20376	8.35903	8.10572	8.41603	7.90259	7.50979	8.41837	7.74255	8.12593	7.57572	8.27088	7.26768	7.44255	8.87752	7.53678	8.18195	8.44295	7.82992	8.58706	8.1667	7.41771	7.66256	8.12243	7.32082	8.5733	7.91619
DCST1-AS1	8.63845	8.88832	10.457	8.45609	8.10346	9.07759	7.99687	9.42923	8.1385	7.81415	9.02968	8.25476	9.48052	8.23982	7.78385	9.03865	8.92132	9.01479	8.17248	8.36904	8.55795	8.6698	9.31107	8.40661	9.11031	8.48878	7.76042	8.58018	8.73186	7.82276	8.82023	8.76718	9.23466	8.89803	7.9158	9.07219	8.35478	8.12963	8.8505	8.67611	8.74654	9.03764	8.91913	9.84001	8.81055	9.14573	8.80949	8.89823	9.31032
LINC00392	11.5499	6.65749	7.41893	7.54708	13.1784	7.88752	7.37875	6.77105	7.02481	11.9614	6.86233	6.50784	7.74818	7.4414	6.64824	12.4713	7.47433	6.74506	7.67282	7.24654	7.24231	7.35122	7.49318	7.35834	7.52702	7.75648	9.98613	7.13203	6.8009	7.45778	12.9799	12.4054	6.85797	8.94286	7.16755	6.80703	7.6844	7.0093	14.4037	7.32499	7.4815	7.72532	7.77384	6.77205	6.99868	7.34567	7.03728	13.6831	7.1692
ZNF718	8.07734	6.80318	8.98768	7.6548	7.81664	8.2472	7.55534	7.99549	8.06773	8.2496	7.77377	6.88212	8.54052	7.77496	8.1012	8.17033	8.74613	8.2103	7.58034	7.80273	9.32722	8.54399	8.16601	9.09619	8.91751	8.30947	8.52229	7.99462	8.38255	8.28307	8.96028	8.10739	7.72685	8.20915	7.77631	6.59973	8.12535	8.0037	7.28893	8.62287	8.65973	8.53545	8.54294	8.56145	7.80587	9.05388	8.60169	7.8751	7.22496
AC074183.4	9.19995	7.69969	9.00808	8.91309	8.13892	9.54415	9.13397	7.77949	9.00247	8.5972	8.15897	9.21715	8.6881	8.62103	9.2064	8.55078	8.85438	8.10608	8.78317	8.81208	8.9514	9.14596	9.17225	9.48455	9.02016	8.39167	9.17759	9.21239	8.39284	9.08022	9.58166	9.37242	8.74037	9.57294	9.50476	9.15661	8.38901	7.72599	8.97247	8.26891	7.82444	8.60598	8.7632	8.57986	9.18218	9.31394	9.19163	9.42289	8.91923
RP13-270P17.2	10.3084	7.58616	8.63042	7.83576	9.62461	8.1411	7.9684	8.06367	8.60305	8.22105	8.60985	7.9746	8.4734	8.15039	8.6218	8.8815	8.18016	7.93189	8.38426	8.05862	8.42357	8.76633	8.18556	8.21321	8.82061	8.4329	8.44469	7.81987	9.77221	8.07803	7.90262	8.30261	11.2585	8.36543	8.06153	8.07494	8.99796	8.82935	8.53668	8.84459	8.48313	8.78557	8.77626	8.75291	8.9989	9.25339	7.89797	8.1709	8.83464
RP11-498P14.3	8.25213	9.14851	9.66105	8.43339	8.26069	8.74857	7.50045	7.80664	7.93642	7.82455	9.0174	8.68384	8.75614	8.12598	7.97888	7.97969	8.28579	8.08306	8.30798	9.51356	8.9309	7.90755	9.13582	8.79882	9.1948	9.33835	8.47121	9.1751	7.76721	8.98395	8.71755	8.6895	8.73717	8.87975	8.13255	7.98023	8.25305	8.21601	8.8269	8.88785	8.64949	8.41654	8.92468	8.86359	8.12718	9.18147	9.90714	8.3665	8.21274
RP11-25K21.6	7.82051	8.26033	7.68209	7.58341	6.93143	8.63831	7.63137	7.77979	7.71104	7.3932	7.16619	6.50784	7.95095	8.72833	6.69649	7.9828	8.33696	8.17637	6.94534	8.42181	9.1003	7.98113	7.78846	7.71859	8.18678	7.84743	8.36718	8.49604	6.70361	8.47119	8.23702	8.00548	7.94809	8.77846	8.24062	7.46076	8.09986	7.30101	7.62656	7.73662	7.94208	9.00189	8.11907	7.33316	7.72319	8.12999	7.45489	8.56314	7.79667
LINC00685	8.22236	8.46362	7.82306	8.05065	7.0412	8.23494	7.78797	7.99718	7.72504	7.59214	8.09506	6.89238	8.55955	8.12659	7.31241	7.89279	8.33467	7.69017	7.45562	8.20292	7.62935	7.39763	7.64952	8.19415	8.90926	8.2405	7.67237	7.77857	7.987	7.85466	8.09845	9.34342	8.35527	7.70309	7.21724	6.92005	8.33788	7.24897	7.76118	8.6541	7.95589	8.29344	8.47015	8.01684	8.00697	8.36718	7.47715	8.29683	7.5212
RP11-661A12.5	8.56103	7.17125	8.1894	9.19608	7.05984	8.20557	7.8835	7.71948	7.48078	7.84954	7.21601	6.50784	8.69457	8.06952	7.20429	7.22864	8.55113	7.06012	7.60298	7.56247	7.76408	8.14883	8.68538	8.07662	8.24798	7.98271	8.25242	7.88154	7.377	8.23953	7.71587	8.04798	7.53321	8.10604	7.14299	7.33826	8.674	7.32755	7.99059	8.29739	7.6705	8.39223	8.06167	7.38887	7.60071	8.06968	7.48692	8.36572	7.66488
STX17-AS1	8.58994	7.37298	8.27724	7.46366	8.10688	8.29399	8.48173	7.80177	7.46041	7.47764	7.47905	7.45318	8.61731	7.21037	8.54322	8.2404	7.67798	7.47997	7.58629	9.0894	8.42238	9.23413	7.57729	8.13144	8.22279	8.96526	7.30402	8.24285	7.50143	7.48947	8.0399	7.43549	8.27217	7.72214	7.94364	7.92533	7.9526	7.98487	8.14446	8.04625	8.01549	8.55563	8.3953	7.73875	7.80395	8.35007	7.64887	7.81136	7.35952
NNT-AS1	8.19302	9.17719	9.38063	8.94956	8.21812	9.02597	7.60973	7.92451	8.52858	8.13949	7.88213	7.83698	8.70507	8.13504	8.37871	10.2249	8.90653	7.96732	8.13437	8.80383	9.14284	9.26023	8.30906	9.00991	8.85523	9.00244	9.62216	9.76067	8.51836	8.97565	9.24141	9.68666	9.02088	8.3485	7.97209	8.31967	9.02626	8.43587	8.65452	9.29045	9.46706	8.91448	10.9946	9.57262	9.11988	9.5606	9.03762	8.75946	8.5709
LOC284023	9.99867	10.836	10.0135	9.94745	10.8916	8.6378	9.33847	9.90512	8.73803	9.59263	10.2314	9.12337	9.35832	9.05005	8.84754	9.36834	10.2683	9.3641	9.91225	9.51608	9.98081	9.37408	9.57985	10.1314	9.53678	10.0384	9.48832	9.46743	9.34254	9.53731	9.08492	10.1019	10.4291	9.41651	9.02914	9.31994	9.55928	8.29333	10.01	8.91494	9.3496	9.47422	9.41299	8.72944	9.81226	10.3098	9.90953	9.36644	9.92432
LINC00649	8.9117	9.1294	8.81084	8.00258	7.71487	8.65377	8.00077	8.37396	8.43532	7.54884	7.93806	7.18845	9.03663	7.84248	8.71811	8.79254	9.16763	8.37569	8.40384	8.22188	8.79235	9.2352	8.69804	8.31689	8.64546	8.502	8.07801	7.73103	8.8405	8.26785	8.14441	8.34284	7.78207	8.18221	7.44843	7.57781	8.82875	8.37249	7.92388	8.25241	8.70133	8.75295	9.42315	7.99101	8.06175	8.39925	8.74881	7.93227	7.70658
AC087491.2	7.40347	10.1623	7.6661	8.17879	7.71878	7.67427	7.37875	8.12308	7.17957	7.45	7.10692	7.17046	7.66289	8.0213	6.90732	7.35905	7.85153	6.85681	7.16219	7.24654	8.16101	7.35122	7.57299	7.848	7.71262	8.34796	7.22165	7.27967	6.94629	8.18748	10.2888	7.32991	7.87764	7.66656	7.23689	6.82205	7.83386	7.41599	10.4666	8.21333	10.0042	7.27468	7.70415	7.26367	7.10894	8.16046	7.07872	8.94794	13.0721
TP73-AS1	8.27777	8.63237	8.57343	9.1858	9.14008	9.13316	7.78653	8.1593	9.39374	8.74904	7.96403	7.65133	8.89936	9.49476	9.25643	9.81009	9.6609	8.17718	8.83717	9.60206	9.87984	9.65201	8.32627	9.14008	8.90629	8.6713	9.89301	9.78168	7.87982	9.33044	9.82011	9.11964	10.0274	8.97051	8.74955	8.12764	9.47645	9.01029	9.64862	9.35316	9.27819	9.69337	9.88607	9.55528	9.18872	10.1048	8.01751	9.13381	8.75368
AC007255.8	7.70297	6.80727	7.95731	7.34661	7.39715	7.78981	7.37875	7.9661	7.10407	7.22698	7.13641	6.94597	7.76582	7.57922	6.5662	8.14788	8.49077	7.01589	7.02458	7.26289	7.93431	8.21744	7.51923	8.41548	9.16028	7.6271	7.31603	8.07596	6.87004	7.43852	8.40421	9.03497	7.14994	8.432	7.79458	6.85698	8.00463	6.97698	7.67801	7.90915	8.28749	7.55867	7.86046	8.78727	7.02711	7.68011	7.59796	7.38642	7.22906
RP3-430N8.10	13.0101	13.5702	14.1901	13.3118	12.4857	13.3422	11.0671	12.7861	13.2214	12.7099	12.5305	10.9212	12.9289	13.7127	12.6871	13.3118	13.3433	13.0283	12.55	13.4643	13.1754	13.9056	13.5068	13.5297	13.2283	13.642	13.3541	13.059	12.4764	13.3288	13.0709	12.9276	12.7008	13.1001	12.9142	12.5311	13.5831	13.0765	13.6481	14.4952	13.8772	13.3239	13.2802	11.962	12.8325	13.4381	13.1084	13.135	13.5794
RP5-827C21.2	13.2373	12.2884	12.6736	12.5988	13.2425	13.7629	13.0137	12.6336	12.8084	13.8823	13.3878	13.8061	13.3618	12.5093	12.3667	11.8084	12.2841	11.9945	12.3904	12.9151	12.386	12.1525	13.0619	12.6149	12.9529	13.7686	12.5284	13.1736	12.2746	13.2203	13.6208	12.9505	13.277	13.3689	13.1294	12.9777	13.0665	11.6491	12.5496	12.2636	12.0999	12.7131	12.5592	12.6303	12.677	12.5298	13.362	13.2511	12.7066
LINC00667	12.2156	11.1264	10.8381	8.8408	10.7429	9.71892	8.46336	9.58132	10.1617	9.47285	8.83036	9.11666	9.47262	9.46021	9.99165	10.0706	10.0272	9.75378	10.1373	9.63967	10.6755	10.3464	9.57557	9.84316	10.7811	11.0541	9.50862	9.56669	10.4322	10.0213	9.89627	8.59755	12.2188	9.21718	9.7314	10.2953	10.1061	10.3274	11.8233	11.0794	9.82733	9.79949	10.3208	10.2109	10.2028	12.2034	9.82656	10.3438	10.5751
RP11-143J24.1	9.15318	8.90264	9.0847	8.4317	9.1152	9.92172	9.4741	8.28444	9.46609	9.37513	7.89568	9.70181	8.9422	8.53414	8.75191	9.5522	9.07118	8.25049	8.44963	8.99556	9.10265	9.78438	8.69249	8.88825	9.0507	9.28797	8.29696	9.0471	8.60069	9.15091	9.0805	8.4159	9.46333	9.78708	8.96836	8.48949	9.03737	8.22839	8.19508	9.36103	8.71715	8.76729	8.74798	8.17717	9.52768	8.6321	8.91311	9.41758	8.81405
RP11-397A16.1	7.80442	9.06475	8.1048	7.48319	8.00776	7.99653	8.95909	6.6996	7.32483	7.72162	8.15728	7.08897	8.74309	7.63749	6.84138	8.31097	7.9264	7.17035	7.55064	7.69417	8.2978	8.05691	8.44176	9.13498	8.28178	8.7374	7.7236	9.083	7.25766	8.53646	8.5373	8.60097	6.95311	8.20668	8.18526	7.55441	8.19349	7.77577	8.1588	8.53231	8.22365	8.53521	8.36759	9.39125	7.38065	7.86427	8.42488	7.65297	7.75058
LOC105375666	7.98667	8.22515	8.48076	8.15666	7.71113	8.37893	7.37875	8.27102	8.49027	8.97049	9.13979	7.92193	8.68614	8.39221	7.58709	8.94778	8.21796	8.62575	8.03592	7.93789	8.14963	8.28473	8.13348	8.84194	8.37941	8.36541	8.48275	8.10488	8.04725	8.50689	8.44675	9.19267	8.66866	8.27474	7.98442	7.68889	9.45046	7.42334	7.64958	8.53524	8.55381	8.82071	9.43299	7.77638	9.90644	8.7137	8.6968	8.52548	8.17749
RP11-410L14.2	7.98667	8.22515	8.48076	8.15666	7.71113	8.37893	7.37875	8.27102	8.49027	8.97049	9.13979	7.92193	8.68614	8.39221	7.58709	8.94778	8.21796	8.62575	8.03592	7.93789	8.14963	8.28473	8.13348	8.84194	8.37941	8.36541	8.48275	8.10488	8.04725	8.50689	8.44675	9.19267	8.66866	8.27474	7.98442	7.68889	9.45046	7.42334	7.64958	8.53524	8.55381	8.82071	9.43299	7.77638	9.90644	8.7137	8.6968	8.52548	8.17749
CA3-AS1	7.68481	6.76399	8.55885	7.82602	6.864	8.28513	7.99979	8.15224	7.51214	7.63457	7.81845	6.96049	8.32533	7.62839	7.18259	7.23423	8.17828	6.94846	7.4377	7.49167	7.57947	8.38935	7.63338	7.47315	7.59459	7.71829	7.76881	7.16826	6.78469	7.59429	7.46214	7.27596	6.94696	8.46843	7.99402	6.84398	8.27425	7.24327	7.27156	7.45924	7.25174	7.69441	9.83325	7.35214	7.97542	7.57235	7.45348	7.43741	7.49041
P3H2-AS1	8.13326	6.69599	8.29783	8.5333	6.83126	7.87188	8.64664	7.60293	7.06854	7.54092	8.4984	7.18299	7.66289	7.35659	7.72056	7.09374	7.65143	8.43869	8.24097	7.9656	7.48794	7.38426	8.2975	7.36257	7.74597	7.58133	7.28476	7.21753	8.06042	8.29426	7.29225	7.61663	6.85797	7.75693	7.25029	7.66778	7.89866	7.52783	10.256	7.796	7.25632	7.23459	7.73451	8.01239	7.09511	8.35162	7.03728	7.64013	7.75872
XXbac-BPG181B23.7	7.73912	7.8085	8.40029	7.98737	7.40597	8.45051	8.06123	7.75203	8.64661	7.62282	8.22729	7.64409	8.40223	8.4745	7.13766	8.1702	8.36637	7.46922	7.43965	8.18998	9.43088	9.36955	8.94822	8.13896	8.98059	8.08846	8.48077	8.69749	7.57353	8.77677	8.60342	8.49364	8.83359	8.93757	8.23733	7.92103	9.00699	7.28651	8.03816	8.34876	9.05604	8.08691	8.28053	9.06273	7.96305	8.82645	8.96734	8.53049	8.4441
AC108676.1	8.86248	6.96349	9.07277	8.61235	7.64103	8.62887	7.44953	6.64609	7.08435	8.20103	7.10679	6.50784	9.27972	9.03585	8.60634	8.62273	7.60504	7.20649	7.94705	10.4398	7.24231	10.7167	7.49318	7.55804	7.58838	7.84901	9.48952	9.3071	7.39786	7.573	7.56005	10.3729	7.66081	7.31495	10.1668	7.52865	7.6844	7.78166	7.95073	8.41774	9.85267	7.23459	7.62438	7.57747	7.43976	7.51892	9.165	7.46779	7.97076
RP11-1275H24.3	9.01693	8.23052	8.29022	9.55737	8.72958	9.47183	8.25962	8.64515	8.58998	8.4904	8.47792	7.49834	9.0017	8.11536	7.38271	7.50255	8.72346	8.92316	7.70747	7.98815	8.37459	9.00005	8.11367	8.5589	9.20454	8.93714	8.28118	8.08662	9.63096	7.919	8.56307	8.12223	8.29458	8.50398	8.83532	8.02814	8.76848	9.13749	8.90603	9.31622	8.34197	8.57302	8.84287	8.39643	8.87494	8.9054	7.89978	8.46438	8.48318
RP13-582O9.7	8.57796	7.81311	9.01732	9.71346	8.2297	9.28041	9.04899	7.7094	8.8096	8.50183	9.077	8.0456	8.47892	8.25341	6.88774	7.88633	8.71661	8.46098	8.39532	8.4153	8.14143	9.494	9.32442	9.1444	9.85952	8.48029	7.64468	8.0008	8.21099	8.28046	8.05769	8.75629	8.07913	8.19442	7.91694	7.51277	9.35254	7.83141	8.39596	8.50768	8.61257	7.88763	8.80256	8.34207	9.17098	8.71707	8.7891	8.99284	8.34527
RP5-940J5.6	7.40347	7.96883	8.5854	7.2537	7.19296	8.14936	7.37875	7.74284	7.73687	8.13068	7.28741	6.79221	8.34437	7.37702	6.98788	7.67236	8.74075	7.70132	7.32777	7.89896	7.73169	7.75887	8.0044	8.12983	7.81156	7.83536	7.26162	8.11324	7.67296	8.03523	7.79218	8.17254	7.98543	8.13364	7.16412	7.02213	7.92556	7.50194	7.56406	7.87918	8.42273	7.87665	7.93844	9.52451	7.67493	7.6092	8.25145	8.94191	8.60756
FGD5-AS1	11.9223	12.2071	12.3494	11.9707	10.5937	11.2597	9.11505	11.4883	11.7583	11.8615	11.5574	10.8341	12.2725	11.5985	11.4919	11.7122	12.2701	11.854	11.6529	11.9606	12.3841	12.3368	12.4496	12.2327	12.3616	12.1782	12.5772	12.3899	12.8554	12.1358	11.6813	11.7537	11.8098	11.682	11.0403	11.1447	12.4116	11.7223	12.2056	12.5234	12.9039	12.2294	12.7184	11.7914	12.6816	12.1538	11.6449	11.8246	11.353
RP11-967K21.1	8.22417	8.33825	9.45803	8.41244	8.06376	8.23782	8.80863	8.41546	8.11823	8.29488	8.24379	6.69659	7.99398	8.49707	8.19475	8.40816	9.76318	7.6491	7.82259	7.89916	8.86095	9.20497	8.38057	9.06461	8.41708	8.46312	8.25163	8.56047	8.27289	8.3738	8.55431	8.9817	8.49593	8.00288	7.85956	7.89819	8.76313	8.77363	8.00182	8.56787	8.52268	9.1881	8.46712	9.76431	7.73062	8.95849	8.44171	8.18435	8.0444
RP11-498E2.9	7.40347	6.96811	8.5412	7.55359	7.04935	8.63333	10.7288	8.10478	8.00431	7.66824	9.18357	7.20666	9.56957	8.50793	7.74326	7.72486	7.83552	7.47433	8.65447	7.37405	7.87417	7.86862	8.76227	7.55284	8.06183	8.87874	7.72973	7.32513	7.77148	8.05587	7.44869	7.64984	8.03252	7.92544	8.01396	8.81466	8.83301	7.58857	7.31304	8.2981	7.89513	7.46536	8.13512	7.09937	7.3464	7.62999	7.4246	8.46761	7.57566
RP11-20D14.6	7.49066	6.73794	8.6139	7.8407	8.47277	7.92951	7.45588	6.7542	7.03752	7.17824	8.70594	10.1685	8.89047	7.20417	10.9789	7.21918	7.65796	12.606	7.7575	11.3783	7.65768	7.47122	7.93543	7.51334	7.59283	12.0962	9.98759	7.31717	13.1084	7.71118	7.40358	10.1561	10.3142	7.47427	8.60281	11.8581	7.83274	13.4199	7.15324	7.48025	7.34441	7.50441	7.70346	15.0282	8.01342	7.55276	7.12544	7.70512	7.96351
RP11-661A12.9	7.70115	7.27003	7.50686	8.00126	6.77414	7.94373	7.37875	8.18423	7.41393	7.63269	7.60075	6.58741	7.9411	9.20043	7.15033	7.6773	8.03808	7.54911	7.869	7.87134	7.35093	7.53057	8.11155	8.06177	7.81979	7.72841	7.40957	7.81948	7.97989	7.81657	8.48053	8.53663	8.32221	8.34033	7.26789	7.19002	7.6844	6.8437	7.42082	7.60719	7.48359	8.11782	7.6747	7.13928	7.40146	7.73891	7.0832	7.60213	8.00432
RP11-5C23.1	8.03841	8.04971	8.19862	7.84992	7.34033	8.77901	7.76088	7.53587	8.52484	7.71807	7.58346	7.49141	8.69398	7.86676	7.217	7.75992	8.44678	7.68171	8.04292	8.45516	8.99102	9.24834	8.63998	8.46816	8.29596	8.86606	7.99625	8.34106	7.63152	8.98332	8.35825	7.68579	8.86239	8.0946	8.1466	7.78184	8.03045	7.89771	8.36717	8.80421	8.36025	8.43726	8.38007	7.32815	8.01041	8.43802	8.02711	7.81246	8.59744
LINC01010	8.43368	6.90767	7.88508	7.55678	7.6392	7.95635	7.79138	6.86408	7.20131	8.21621	7.11445	7.3376	7.87521	7.59203	7.76666	7.25062	7.77319	7.28769	7.86548	7.49085	9.09245	7.82697	7.64045	7.65857	8.66176	7.85271	7.60709	7.49472	8.11401	9.64761	10.7168	7.85548	7.94308	7.80102	8.13398	7.16177	8.1241	8.00046	7.29692	8.74322	7.4535	9.38818	7.8326	7.66296	7.26275	8.75157	7.45257	7.56217	7.36759
RP11-10C24.3	8.78548	7.52669	9.55932	9.11477	8.0179	9.01287	8.09608	9.24141	8.42695	7.74424	8.32124	7.574	9.45803	8.71752	8.20735	7.77199	8.9849	8.65232	9.09482	8.59362	8.45882	8.76722	8.8854	8.59025	8.76045	9.0769	9.44446	8.87228	8.97177	8.60878	8.10749	8.77269	7.84421	8.44201	8.7443	7.65288	9.32672	8.17599	8.49944	8.71943	8.72257	9.00152	9.60151	8.17454	7.75721	8.22914	7.43919	8.29864	7.91155
RP11-119B16.2	8.04509	8.2355	8.28476	8.92513	7.5806	8.46582	7.47241	7.45041	8.06753	7.91579	7.73099	7.1418	8.20985	8.36558	7.38067	7.90582	8.91604	8.76467	7.53907	7.78696	8.0953	8.65785	8.14086	8.86253	8.41425	8.42074	8.02364	8.03545	7.61788	8.15658	8.16711	8.20499	7.54398	8.08731	7.4818	7.0888	8.47676	8.24963	8.10614	9.1492	8.05528	8.96574	8.11824	8.37588	8.38555	8.05435	7.45853	7.51114	8.61092
ZNF649-AS1	8.20878	8.08235	7.65623	7.72408	7.68128	8.41153	7.37875	7.48875	7.73565	8.26295	7.66786	7.46694	8.3908	7.44672	7.62626	7.03912	7.99159	8.28795	7.03884	7.94667	8.02302	7.35122	7.8344	8.42382	8.53781	8.39283	8.17531	7.20822	7.8641	7.74921	7.94577	7.22317	8.36162	7.31495	7.44649	7.88826	7.6844	7.37555	7.00372	7.62456	8.60036	7.61069	7.78071	9.03624	7.89496	8.41852	8.13255	7.38642	7.9783
MIR6516	8.92893	9.26957	9.85599	8.56771	8.58007	9.01268	8.60846	8.65425	9.28002	9.19127	10.2285	8.87246	8.75768	8.93755	8.01009	8.87903	9.09035	8.4783	8.45914	9.21337	9.60441	8.81345	8.53335	9.16019	9.43335	9.85619	8.58685	10.1087	9.97018	9.44963	9.58087	9.59789	9.68159	9.23204	9.30608	9.42301	8.71981	7.92309	9.32004	8.67262	9.55804	8.89649	9.2024	9.38616	8.43505	9.42818	8.91466	8.74275	7.76364
SNHG20	8.92893	9.26957	9.85599	8.56771	8.58007	9.01268	8.60846	8.65425	9.28002	9.19127	10.2285	8.87246	8.75768	8.93755	8.01009	8.87903	9.09035	8.4783	8.45914	9.21337	9.60441	8.81345	8.53335	9.16019	9.43335	9.85619	8.58685	10.1087	9.97018	9.44963	9.58087	9.59789	9.68159	9.23204	9.30608	9.42301	8.71981	7.92309	9.32004	8.67262	9.55804	8.89649	9.2024	9.38616	8.43505	9.42818	8.91466	8.74275	7.76364
RP11-83A24.2	8.28954	8.20426	8.56385	8.14832	7.94195	8.72689	8.04329	7.97604	7.84487	8.35588	8.82148	7.34323	8.02596	8.35213	7.53068	9.07996	8.77304	8.0349	8.01805	8.02247	8.58684	8.81206	9.33268	8.93791	8.62049	9.04634	8.00744	8.15612	7.74796	7.91887	8.01994	8.55494	7.49611	8.51877	7.90897	8.87292	8.2492	8.39209	8.66694	8.39074	8.88185	8.65368	8.32362	7.66516	7.66271	8.69901	9.09749	8.50383	8.83595
KTN1-AS1	8.33152	7.4454	9.50832	8.576	7.4711	9.61418	8.02541	8.22175	8.96725	7.59393	7.81021	7.49948	8.66812	8.76517	7.79068	8.91058	9.18201	7.46379	7.95158	8.80907	8.3125	8.62387	9.21565	8.68073	8.46048	8.40004	7.91006	8.24745	7.37693	8.29243	7.8115	8.55666	7.82926	8.32834	8.05893	7.70152	9.42755	8.37314	8.58616	8.77979	8.10341	8.3742	8.39556	7.33025	8.39859	8.09066	8.20614	8.36599	9.17139
LOC441178	8.31533	6.73815	8.13576	7.52894	7.86881	8.10928	8.7478	7.27327	8.77218	7.69808	7.37688	6.50784	8.01324	7.147	6.66323	7.03912	7.83269	6.83956	7.46873	7.35568	9.0086	7.81089	7.49318	7.39405	7.64758	8.49434	7.11864	7.13203	8.38066	7.66722	7.85432	7.28907	6.88634	7.37218	6.92249	7.55001	7.79281	7.0896	7.0742	9.19972	7.69467	7.99721	8.56135	6.7741	7.00456	7.97036	7.10729	7.66922	7.42623
RP11-351J23.1	8.31533	6.73815	8.13576	7.52894	7.86881	8.10928	8.7478	7.27327	8.77218	7.69808	7.37688	6.50784	8.01324	7.147	6.66323	7.03912	7.83269	6.83956	7.46873	7.35568	9.0086	7.81089	7.49318	7.39405	7.64758	8.49434	7.11864	7.13203	8.38066	7.66722	7.85432	7.28907	6.88634	7.37218	6.92249	7.55001	7.79281	7.0896	7.0742	9.19972	7.69467	7.99721	8.56135	6.7741	7.00456	7.97036	7.10729	7.66922	7.42623
RP11-395N3.2	7.58624	7.09517	7.53986	8.48292	7.03258	8.32661	8.45109	7.72742	7.90183	7.12255	7.03023	6.6301	8.61821	8.80554	7.19243	7.33665	7.80486	7.4045	7.79471	7.34736	7.24231	7.89696	7.93989	8.75125	7.53269	7.58133	8.02025	7.29176	6.57966	7.48516	7.31385	9.56222	6.97824	7.83396	7.28823	7.08623	8.33696	6.9261	7.04691	7.56393	7.36678	7.57378	7.90866	6.81125	7.14612	7.32333	7.17716	7.38642	7.65064
LINC01106	8.12186	7.35449	8.88661	8.70375	8.20475	8.20265	8.9048	8.51554	8.44666	7.62051	8.79536	7.28364	8.40774	8.57839	8.67361	8.17129	9.13505	8.37478	7.99385	8.8868	8.04703	8.80135	9.62023	8.82189	8.74013	9.24617	8.13545	9.46886	8.61713	9.24553	8.54292	9.56726	8.90927	9.48404	8.92258	8.60288	8.09212	7.91369	8.47748	8.88858	8.69649	7.81224	8.37749	7.5989	7.38628	8.08967	7.74581	8.5788	8.76821
CHKB-AS1	9.16976	9.04202	9.90691	9.05839	8.62484	9.43106	8.97631	8.98955	8.31999	8.77183	8.70284	7.35732	9.25443	8.94688	7.24451	8.08767	8.69242	7.94946	7.66998	8.40396	7.94336	8.74667	9.13261	8.58333	8.68991	8.71007	8.59915	8.06132	8.16892	8.24871	8.76037	8.16072	8.09885	8.249	8.20655	8.10664	9.93065	8.45351	8.32054	10.0618	8.74131	8.7278	8.97493	7.71273	8.54416	8.7309	8.60211	8.3115	8.49993
PPP1R26-AS1	7.97615	7.07372	8.29994	8.15316	7.11762	8.42046	7.54769	7.21424	7.13314	7.25436	7.00426	6.75595	7.73534	7.9061	7.08177	7.69669	7.84076	7.0721	7.17207	7.55249	7.95129	7.90348	8.46031	7.94808	8.18254	7.9714	7.33761	8.46805	7.0935	7.84033	8.06302	8.16875	8.08533	7.64849	7.18497	6.65351	7.83716	7.10725	7.61873	7.74816	8.06197	7.90171	8.63365	8.19709	7.2872	8.45814	7.63523	8.57226	7.25672
CTB-31O20.9	8.64045	9.29448	9.22078	8.73815	9.10328	8.95121	7.69182	8.82254	9.2057	8.67245	9.08792	9.19728	8.72841	8.75146	8.06733	8.19701	8.67841	8.63163	8.41441	8.15007	9.75682	8.71276	8.49496	9.32298	9.13689	9.71058	8.39414	9.21016	8.89338	8.94281	9.36564	9.50591	9.94345	9.15959	8.52592	7.6564	9.08287	7.62079	8.98524	8.4137	8.6302	9.00891	8.99419	9.38688	8.17414	8.85394	8.85174	8.64983	8.60987
RP3-402G11.28	8.77789	9.51827	7.87871	8.50582	7.37275	8.34239	7.758	7.50581	8.12116	8.46035	7.37985	7.47552	8.07133	8.94582	7.16441	8.55359	8.76468	7.90541	7.30286	8.12938	8.86418	7.67026	7.94737	8.48771	8.74521	8.13077	8.12896	8.77291	7.78435	8.48902	8.90164	9.11959	8.86248	8.32116	7.88666	7.80546	8.10272	7.26423	8.68434	8.06584	8.56681	8.35531	8.0602	7.96262	7.44646	8.57494	8.16575	8.85036	7.97426
CTB-41I6.1	8.11441	7.16688	7.61877	7.80169	6.98353	8.07854	7.37875	6.68723	7.54667	7.21664	6.93153	6.50784	7.75409	8.2446	6.73177	7.40024	8.21485	7.39303	7.11634	7.38614	7.76167	7.40058	7.71039	7.63892	8.0305	7.75983	7.90971	8.52987	6.67138	7.7978	8.64916	8.13281	7.2937	7.79317	6.98282	6.72786	8.05425	7.15456	7.25527	7.72778	8.22523	8.1053	7.89858	7.55888	7.48439	7.55409	9.04699	7.97826	7.36218
RP11-157J24.2	8.14634	8.38953	9.14317	7.85725	6.78402	8.17491	7.4846	6.97339	7.28975	7.39108	6.96854	6.50784	8.16761	7.15425	6.5662	7.88073	7.79117	6.86328	6.94866	7.73028	7.55495	7.87672	7.97584	7.67048	7.96884	7.88065	7.38037	7.42366	6.79039	7.51497	7.54891	8.64575	6.85797	8.46377	7.14716	8.73511	7.98461	6.91786	7.5206	7.77638	9.50139	7.64885	8.1364	8.2316	8.80891	7.55903	8.41479	7.83994	7.43284
CTC-338M12.9	7.40347	7.28356	8.28356	7.27597	8.14125	7.63781	7.37875	6.70595	7.02706	8.5974	6.84898	6.83978	7.98628	9.88267	7.0402	8.58417	7.50417	6.79871	6.94534	9.20971	8.89121	7.35122	7.49318	8.19507	8.89494	7.58133	8.65447	10.1028	6.53071	7.98697	8.4058	9.16119	6.85797	7.31495	7.15741	7.43913	7.6844	7.23978	8.58764	7.43595	7.47225	8.09446	7.64406	8.42004	7.22655	8.30724	7.23873	8.21226	7.51652
RP11-225B17.2	8.83513	8.78948	9.44417	8.81343	9.75822	10.4108	7.50095	8.89112	8.76799	8.9667	9.32984	10.0469	8.33215	8.56422	9.09262	9.45532	8.88477	8.49579	8.27034	8.58388	8.79581	9.68133	8.68183	9.13129	9.14666	9.03382	8.68486	9.55602	8.71915	9.37454	8.98082	9.93192	9.81955	9.52674	8.9521	9.1866	9.53718	9.8816	9.50014	9.19636	9.34908	9.32656	10.3741	9.61834	9.49451	10.047	8.83301	9.18659	9.08273
CTD-2035E11.3	7.98768	7.63081	9.45623	8.48889	6.94733	8.75059	8.41377	7.13197	8.65922	7.93831	7.75791	6.94208	8.38338	7.88818	6.73879	7.91173	8.80969	7.75479	7.65936	7.84495	8.04777	8.55752	8.18929	7.96365	8.64014	8.76383	7.73397	8.60992	7.39566	8.14338	8.0866	8.36402	7.34973	8.14071	7.24705	7.26529	8.09746	7.87499	8.16057	8.36901	8.29707	8.12123	9.42945	8.49374	7.60034	7.99044	8.07304	7.94765	8.42718
CTC-523E23.11	8.02073	8.85791	7.91007	7.90143	7.91829	8.25605	7.70759	7.01126	8.82135	8.56751	7.24389	6.81883	8.22371	7.60683	6.67916	8.55404	8.14024	7.91944	7.25501	7.86549	8.10113	8.63033	7.93808	8.18025	8.47649	9.51154	7.24024	7.87696	7.28895	8.2722	8.23224	7.56436	7.99229	7.89922	7.78896	6.76153	8.30312	7.31599	8.24218	8.68575	8.66571	9.23774	8.54864	7.91241	7.49764	7.76839	8.3744	7.77892	8.21591
LOC102723540	8.02073	8.85791	7.91007	7.90143	7.91829	8.25605	7.70759	7.01126	8.82135	8.56751	7.24389	6.81883	8.22371	7.60683	6.67916	8.55404	8.14024	7.91944	7.25501	7.86549	8.10113	8.63033	7.93808	8.18025	8.47649	9.51154	7.24024	7.87696	7.28895	8.2722	8.23224	7.56436	7.99229	7.89922	7.78896	6.76153	8.30312	7.31599	8.24218	8.68575	8.66571	9.23774	8.54864	7.91241	7.49764	7.76839	8.3744	7.77892	8.21591
RP11-493L12.3	9.42142	6.65749	7.6596	8.1736	6.72382	8.21702	9.45949	8.86047	7.59708	7.34794	6.97234	6.54995	7.89007	8.25349	6.76466	7.03912	7.47433	6.76751	7.41159	7.24654	7.35819	8.52152	7.56255	7.78663	7.47361	7.62454	7.38135	7.54497	6.53071	8.58155	7.32713	7.69119	7.18597	7.43327	7.31148	7.42622	7.94797	7.00121	7.43455	7.58323	7.66829	7.72546	7.80005	6.75054	6.99868	7.43259	7.03728	8.31077	7.40009
RP5-998N21.10	7.57877	7.10405	7.5005	7.84866	7.13573	7.68248	7.37875	7.29588	7.25779	7.32998	6.9067	6.50784	8.00039	8.03905	6.98535	8.4505	8.78735	7.13137	7.98046	7.63205	8.06441	8.82234	8.00381	8.17948	7.75746	7.71829	7.93552	7.4789	7.08679	8.41947	7.47622	7.61854	7.54753	7.45501	7.03684	6.88964	8.27773	6.98078	8.53291	8.19974	8.31992	7.81241	8.05433	6.97856	9.05802	8.43837	7.67372	7.75772	7.34841
OLMALINC	8.57443	9.06367	8.9935	8.32057	8.40355	8.48069	7.96568	8.67746	8.29632	9.37772	8.7882	7.86787	8.65585	8.79452	8.32492	9.51814	8.98748	8.73665	8.00171	8.43007	8.81945	9.07622	8.21028	9.72143	9.6142	9.03241	8.93406	9.34429	8.13841	9.43125	10.6824	10.7273	9.02723	8.67806	8.36245	7.99871	8.59296	8.40542	8.71714	9.9088	9.29682	8.69171	9.42831	9.52841	9.8743	8.96903	8.86646	8.71649	9.54193
CTC-367F4.1	7.95008	7.15342	7.82397	7.62406	7.23455	7.97446	7.37875	7.05619	7.62017	7.51766	7.25514	6.90211	7.90537	7.59907	6.94879	7.45205	8.24782	7.27937	7.75236	7.30395	7.51401	7.3916	8.67395	7.86483	7.89056	8.97531	7.4394	7.49048	7.29722	7.73043	8.62091	7.58014	6.95281	8.40376	7.09462	6.62418	8.09989	7.46715	7.39356	9.70124	7.82609	7.53709	8.11496	6.92652	7.21677	8.35711	8.05558	7.66712	7.3031
RP11-144G6.12	9.1763	8.45055	8.05044	8.07315	7.4135	7.87484	7.72075	8.08224	8.05934	8.00142	7.70978	6.66712	8.62094	8.87318	7.38525	8.1013	8.59102	8.62889	8.72472	8.18687	8.7327	8.95452	8.57405	7.70427	8.35573	8.09301	7.90752	8.09319	8.13293	8.19968	8.85893	8.70678	7.49536	8.09387	7.5898	7.12778	8.21474	7.44021	8.15949	8.47213	8.94769	8.25421	8.25538	8.08627	8.00554	8.37996	8.51684	8.12855	7.63805
LINC01759	8.79188	8.8574	9.20914	9.03453	7.37336	8.72926	8.59155	8.45357	8.43378	9.09648	8.93665	7.253	8.60066	8.50628	7.26099	9.58448	8.66641	9.04797	7.67805	7.87864	8.96714	8.62541	8.63174	9.5822	9.62519	9.85532	8.36267	10.023	8.67824	8.24991	9.10928	8.98069	8.75335	8.94951	8.3647	7.37317	9.07642	8.2175	8.98446	8.5449	8.5374	9.35936	9.29896	8.33076	9.01305	9.10211	8.48059	10.1173	9.49781
RP11-327P2.5	8.58257	7.41787	8.73363	8.44081	7.80609	8.68406	7.52929	7.95846	8.24624	7.8584	7.37106	6.72522	8.56437	7.84482	7.41904	7.88535	8.45351	7.6493	7.96239	7.79262	8.21686	8.50075	8.06645	8.65927	8.48685	8.32426	8.20018	8.20286	7.5729	8.8559	8.49589	8.01712	7.52469	8.22244	7.58209	7.41489	8.97883	7.35247	8.0553	8.92622	8.35536	8.8436	8.82346	8.51702	7.36654	8.33188	7.45147	8.07873	8.00802
RP11-505K9.1	8.0252	7.42875	9.23403	8.62396	7.99443	8.78397	8.90573	8.66025	8.80853	7.63892	8.02535	7.38958	8.71034	8.53156	7.22248	7.58359	8.61595	8.68014	8.07784	7.64947	8.45248	9.21807	8.46492	8.34694	8.5472	8.45434	8.3292	8.11944	8.76378	8.25202	8.42559	8.33812	7.90428	8.52982	7.82418	7.7245	9.83365	7.40111	7.39585	8.39077	8.99616	9.24113	9.6224	7.6263	10.2578	8.07474	7.99674	8.28095	7.83731
LOC103344931	8.95183	8.03653	7.71778	8.61913	7.21443	8.8409	7.84215	7.695	7.82548	8.66044	8.03178	7.50525	9.32445	8.09792	8.28882	8.25661	8.6537	8.34465	8.34939	8.27787	8.32937	8.2506	7.99958	8.10771	8.77596	8.09661	8.30884	8.10264	7.96419	8.58501	8.08972	8.10149	7.9772	8.45132	7.58731	7.44333	8.60617	7.45284	8.1808	8.63729	8.06537	9.12267	8.98146	7.95431	8.38875	9.05581	8.27136	8.22175	8.07699
RP11-57H14.4	8.95183	8.03653	7.71778	8.61913	7.21443	8.8409	7.84215	7.695	7.82548	8.66044	8.03178	7.50525	9.32445	8.09792	8.28882	8.25661	8.6537	8.34465	8.34939	8.27787	8.32937	8.2506	7.99958	8.10771	8.77596	8.09661	8.30884	8.10264	7.96419	8.58501	8.08972	8.10149	7.9772	8.45132	7.58731	7.44333	8.60617	7.45284	8.1808	8.63729	8.06537	9.12267	8.98146	7.95431	8.38875	9.05581	8.27136	8.22175	8.07699
AF127577.8	8.14326	7.87635	8.24787	7.55672	7.06617	7.85625	8.04864	7.34192	7.78225	7.54093	7.15378	6.88901	7.74411	7.70073	7.76982	7.99835	7.82952	7.06628	7.16187	7.405	7.45901	8.75942	7.88674	8.14269	7.84398	8.67045	7.2186	8.57773	6.703	7.79692	8.14607	8.17459	6.8889	8.61237	7.21704	6.64064	7.86544	8.00593	8.69862	8.00757	8.08088	7.49768	8.39784	7.29163	8.71518	7.5697	7.75408	8.54053	7.62164
RP11-809O17.1	7.89217	7.91738	7.57044	8.57003	6.8411	8.78484	8.24666	8.23197	8.02062	8.60985	7.42919	6.6005	7.79677	7.82159	6.98152	7.93023	8.11081	7.39332	7.51295	7.63832	7.77613	8.28426	8.09946	8.42909	8.22766	7.86107	8.18249	8.30727	7.16671	8.02559	8.24094	7.73855	7.14303	8.21485	7.71717	6.98769	8.9059	7.13164	8.08098	8.22256	8.4179	8.61552	8.13588	7.17467	7.80349	8.19689	8.19722	8.45562	7.51497
LINC00094	10.7323	10.3527	10.2913	10.6954	10.0448	10.4911	8.72958	9.26071	9.54958	10.4171	9.80324	7.74862	9.80348	9.9816	9.7553	9.43298	10.0138	8.88651	10.0094	9.95394	9.72091	10.3806	10.509	10.5008	10.2444	9.83487	9.9016	11.2397	9.29033	9.91566	10.3044	9.64414	9.56607	9.32363	9.55475	7.90581	9.8905	9.36869	10.2134	10.2428	9.32425	9.85335	10.9099	9.83677	9.97536	11.0618	9.29612	9.95687	10.1151
CTB-31O20.2	8.6343	9.25399	9.02244	8.70279	9.03693	8.78686	7.81843	8.71204	9.11356	8.64146	9.0803	9.27607	8.65072	8.63371	7.9693	8.26472	8.60897	8.47461	8.32415	8.20499	9.58913	8.51381	8.36037	9.23283	9.02375	9.58147	8.31474	9.1052	8.77795	8.85068	9.31779	9.32735	9.72196	9.05397	8.43213	7.69121	8.89805	7.77968	8.88279	8.21016	8.48354	8.87416	8.99516	9.32474	8.25799	8.78717	8.62872	8.58474	8.44985
LINC01770	7.579	7.12827	9.22384	8.37064	8.42319	8.44712	7.50089	7.92064	7.9912	7.44387	7.54202	7.17354	7.78839	7.85819	7.38304	7.69088	8.28055	7.95206	7.25898	7.68218	8.97117	8.70493	7.8715	8.3792	8.67579	7.82823	7.77604	7.85589	8.76693	7.60359	7.48417	7.65425	8.43434	7.52858	8.60416	8.01849	8.66531	7.69258	7.74394	8.39822	7.80913	8.15581	8.30155	7.8118	7.64173	8.80825	7.91576	7.92924	7.91553
RP11-9M16.2	7.58601	7.46388	8.64058	7.69506	7.10329	7.82339	7.37875	7.35363	8.19869	7.93486	7.44385	6.50784	7.89575	7.52572	7.72729	8.32664	8.42187	7.51064	7.41169	8.16946	9.16147	7.58213	7.9429	8.11408	8.32423	8.21959	7.44619	8.20573	7.23638	8.01324	8.12737	7.74885	7.56626	8.06956	7.49862	7.26723	7.76147	7.54711	7.34825	8.43751	7.96468	7.8091	8.0007	8.36805	8.31814	8.95076	7.97414	7.848	7.37677
RP11-44N21.1	8.45874	8.21097	9.07133	8.90998	8.42222	8.07984	7.75419	8.93407	7.93728	8.20538	8.14075	8.30744	8.02889	8.02017	8.06837	9.07354	8.05738	7.70007	7.47519	7.85175	8.67919	8.25017	7.97805	8.76155	8.47952	8.67942	8.46324	8.17293	8.33278	8.03029	8.34991	8.7542	9.09156	8.54114	8.11316	7.53307	8.99451	7.52656	9.44704	8.69339	8.88163	8.75735	8.76506	8.72203	7.80304	9.04331	7.83133	9.19065	8.90199
CTC-537E7.2	7.40347	8.19823	8.77288	7.2537	8.8054	7.85101	7.37875	7.76147	7.04511	9.51734	7.03708	10.1057	7.72487	7.83109	6.5662	7.79772	7.47433	7.46079	6.94534	7.24654	8.86041	7.40941	7.49318	10.2614	7.77027	9.58528	7.10317	7.88291	6.60605	8.60875	7.9023	8.07145	8.97509	7.6306	8.96951	7.50507	7.6844	7.98762	8.89162	8.00439	9.46363	7.85386	8.02463	6.84366	7.68585	8.06328	7.73552	8.33888	7.70183
NUP50-AS1	10.4822	10.7037	10.0701	9.76329	10.488	9.94231	10.5072	10.5775	10.2811	10.7769	10.2863	10.3198	9.96437	10.3032	9.33218	9.84066	10.5634	9.22227	10.4595	9.78767	10.6036	9.54889	10.2301	10.4548	10.8653	10.3458	9.86981	9.35897	11.0515	10.3722	11.693	11.3833	10.3321	11.7786	10.4917	11.1928	10.7074	9.49751	10.0753	9.62933	9.84576	10.3849	9.56543	9.08863	8.64474	9.79421	9.20507	10.0417	10.2855
LLNLF-65H9.1	8.17472	8.00108	8.58682	7.89232	6.84678	7.99331	7.44246	7.63398	7.91385	8.22763	7.87196	6.82345	8.77395	7.76482	7.92731	7.15138	8.33344	7.88336	8.23039	8.47359	8.57922	8.5617	8.62459	8.50622	8.67514	8.80507	8.18008	8.14887	7.87752	8.13675	7.96594	7.27972	7.56151	7.43971	8.13265	9.14812	8.47468	8.49512	7.32356	8.32971	8.57356	7.84031	8.5447	8.50182	7.43408	8.44323	7.65745	7.94048	7.85833
RP11-325K4.3	8.55794	8.00963	7.91619	8.03705	7.75758	9.07976	7.66713	7.76799	8.14902	7.79362	7.50536	6.87223	9.1851	8.50114	7.2634	9.66488	9.13109	8.6883	8.05632	7.92529	8.64216	7.68465	8.4553	8.66959	8.4402	8.45862	8.23193	8.14185	7.42868	8.15421	8.64978	8.20752	7.88834	8.39287	7.68632	7.24025	8.64786	7.47563	7.61841	7.98059	8.98717	9.25089	8.54574	6.9905	7.53266	8.18535	7.99671	8.82823	7.5018
RP11-20G13.2	7.6555	6.76857	7.87869	7.28702	8.74789	7.69747	7.52326	6.64609	7.19859	8.2995	8.08632	7.24631	7.9597	7.388	8.28006	7.31809	7.68617	9.58289	7.40136	8.00356	9.60879	7.35122	7.60751	7.34871	8.23328	8.02986	8.49456	7.26355	8.34367	10.4307	7.68956	7.48933	9.9725	7.6885	8.00892	9.10509	7.75196	7.67819	7.11954	8.11734	7.48992	7.23459	7.62438	7.80296	7.17026	8.05488	7.38434	7.48526	7.1692
RP11-536O18.1	7.57114	6.84014	7.5654	7.30104	7.28643	8.49237	7.91129	7.04443	7.53132	13.1695	7.32423	7.10503	8.37696	7.10123	6.99926	10.0443	8.17037	7.25758	8.27118	7.68736	8.00823	7.5009	7.9607	7.9145	7.995	8.39812	7.61998	7.81351	6.84249	8.50243	7.63999	7.56761	7.35764	7.47263	8.06079	6.96931	7.97239	7.37909	7.2048	8.00097	7.65368	8.33983	8.33122	7.10477	8.56799	9.91942	7.39395	7.38642	7.22225
LOC729970	7.94865	8.47407	8.09259	8.54619	7.05067	8.09951	7.93858	7.6357	8.44337	7.71449	7.35797	8.04426	8.9056	8.61416	8.57849	10.7141	8.11638	7.54635	8.32573	7.99902	8.70042	9.10264	8.66756	8.36485	8.27792	8.09539	8.60293	8.23906	6.90243	8.43816	7.97927	9.87967	9.34863	8.33935	8.07091	7.2444	9.04758	8.91016	8.22034	8.78002	8.06049	8.60869	9.14708	8.53796	10.2125	7.81188	8.24099	8.47522	8.4462
RP4-639F20.1	7.94865	8.47407	8.09259	8.54619	7.05067	8.09951	7.93858	7.6357	8.44337	7.71449	7.35797	8.04426	8.9056	8.61416	8.57849	10.7141	8.11638	7.54635	8.32573	7.99902	8.70042	9.10264	8.66756	8.36485	8.27792	8.09539	8.60293	8.23906	6.90243	8.43816	7.97927	9.87967	9.34863	8.33935	8.07091	7.2444	9.04758	8.91016	8.22034	8.78002	8.06049	8.60869	9.14708	8.53796	10.2125	7.81188	8.24099	8.47522	8.4462
CTD-2008A1.1	11.8478	10.9818	13.3594	12.4525	11.8867	12.1518	11.55	10.8699	12.2603	12.5349	12.2888	11.3689	12.6	11.9396	12.5946	11.6063	12.4719	13.1221	12.6604	13.1901	12.0178	11.4007	12.1855	12.2733	11.9954	12.3847	11.2951	11.9702	13.253	11.9373	12.6367	12.1853	12.3329	12.0589	11.9816	12.0188	12.2356	13.0268	12.1808	12.5411	13.0355	11.6293	11.8206	13.023	12.1215	12.2427	12.182	11.8753	12.3516
HMGN3-AS1	7.99671	7.35418	9.10055	7.56868	7.55526	8.15174	7.64018	7.41189	7.30397	8.26953	7.31171	6.67516	8.65225	7.71237	7.51566	8.4901	8.40153	7.84337	7.57579	8.0188	8.18226	8.62055	7.97039	7.66927	7.98664	8.25054	7.82925	8.51991	7.39784	7.52713	8.18953	7.65721	7.33432	7.50499	7.16001	6.95228	8.16423	7.73035	7.40842	7.8825	8.36103	8.42116	8.30445	7.85324	7.99512	8.61039	7.57386	8.10444	7.56727
MIR9-3	7.6825	8.84639	8.11661	8.09015	8.82875	8.05657	7.48993	7.0198	7.56093	7.4517	8.82235	6.69486	7.99247	7.7811	9.21921	8.77468	7.98118	8.73433	7.23743	7.36755	8.84455	7.63482	7.60602	7.5424	8.39571	7.73548	7.2622	7.32558	8.38085	7.534	8.99688	7.40705	9.38903	7.85546	8.59195	7.9302	7.75367	9.00624	7.3246	8.01041	8.39083	7.63102	7.90752	8.12078	7.29903	8.80626	8.48554	7.62058	7.6679
MIR9-3HG	7.6825	8.84639	8.11661	8.09015	8.82875	8.05657	7.48993	7.0198	7.56093	7.4517	8.82235	6.69486	7.99247	7.7811	9.21921	8.77468	7.98118	8.73433	7.23743	7.36755	8.84455	7.63482	7.60602	7.5424	8.39571	7.73548	7.2622	7.32558	8.38085	7.534	8.99688	7.40705	9.38903	7.85546	8.59195	7.9302	7.75367	9.00624	7.3246	8.01041	8.39083	7.63102	7.90752	8.12078	7.29903	8.80626	8.48554	7.62058	7.6679
RP11-368L12.1	7.40347	8.22659	7.49458	7.44916	8.14337	7.66981	7.37875	7.35701	7.27406	7.73421	7.4121	6.72008	8.14514	7.11456	6.5662	9.02415	7.64685	8.06039	6.94534	7.7954	7.38865	7.35122	7.49318	7.47316	8.16971	7.98154	7.92802	9.13997	6.53071	7.86934	8.59563	7.22317	6.9252	7.36648	7.97625	7.98693	7.7177	7.66264	8.02099	7.89953	8.30406	8.1253	7.62438	6.75054	7.28317	8.34852	7.06879	7.41113	7.74878
WI2-85898F10.1	9.86726	9.68997	8.79078	7.5789	8.5725	8.00287	9.57692	7.6643	7.37255	7.73094	6.84898	6.99428	8.34832	7.60114	7.16424	7.09878	7.55433	7.19958	7.03327	7.27696	8.29686	7.52849	7.49318	8.12876	9.28557	7.93947	7.17049	7.23125	8.12178	7.39997	8.02482	7.36649	7.89261	7.55818	8.37105	8.55727	7.9024	9.22885	7.37782	8.3296	7.20659	8.41388	7.74394	6.75054	7.03561	7.38434	7.1307	7.50705	7.89835
CTC-273B12.5	8.65259	9.4009	7.97	8.34466	7.53668	8.00331	8.85666	7.57173	7.84465	8.02338	8.76339	8.67301	8.23728	9.06303	8.00661	7.37539	8.36335	7.66038	7.88793	7.62991	8.85304	8.79567	7.83292	8.00951	8.64526	9.27311	8.30008	8.59542	7.68187	8.59467	8.31301	8.17749	9.08943	9.82165	9.01151	8.28989	8.15352	7.68361	8.74942	8.03745	8.69276	8.22728	8.45494	8.01036	7.92366	7.8027	7.24903	9.83065	9.7104
LOC105372430	8.65259	9.4009	7.97	8.34466	7.53668	8.00331	8.85666	7.57173	7.84465	8.02338	8.76339	8.67301	8.23728	9.06303	8.00661	7.37539	8.36335	7.66038	7.88793	7.62991	8.85304	8.79567	7.83292	8.00951	8.64526	9.27311	8.30008	8.59542	7.68187	8.59467	8.31301	8.17749	9.08943	9.82165	9.01151	8.28989	8.15352	7.68361	8.74942	8.03745	8.69276	8.22728	8.45494	8.01036	7.92366	7.8027	7.24903	9.83065	9.7104
AC012146.7	8.37101	8.91828	8.41528	7.56421	7.42584	8.25422	8.37528	8.45998	8.69597	8.06543	8.41962	7.42115	8.42674	7.92575	7.9108	8.06174	8.15043	8.04062	7.75405	9.16012	7.92407	9.15574	9.0375	8.61757	8.2356	8.895	8.89968	8.32029	7.57244	8.45062	8.51189	7.95553	8.39089	8.12073	7.85509	7.17716	8.62412	7.35729	8.26413	8.27267	8.66552	8.21581	8.40509	9.0122	8.2404	8.72419	8.33367	8.47151	9.248
LOC101928000	8.37101	8.91828	8.41528	7.56421	7.42584	8.25422	8.37528	8.45998	8.69597	8.06543	8.41962	7.42115	8.42674	7.92575	7.9108	8.06174	8.15043	8.04062	7.75405	9.16012	7.92407	9.15574	9.0375	8.61757	8.2356	8.895	8.89968	8.32029	7.57244	8.45062	8.51189	7.95553	8.39089	8.12073	7.85509	7.17716	8.62412	7.35729	8.26413	8.27267	8.66552	8.21581	8.40509	9.0122	8.2404	8.72419	8.33367	8.47151	9.248
SENCR	7.6284	7.32438	7.93238	9.46913	7.21299	8.65172	7.75445	7.08162	8.19488	8.10868	7.03664	6.72334	8.27649	7.90034	6.9341	7.69296	8.0289	7.68406	7.69064	7.91563	8.06635	7.82929	8.43106	7.99954	8.36287	8.42724	9.46466	7.64444	6.94241	8.4223	7.73213	7.41187	7.37199	7.95698	8.10774	7.19121	8.67015	7.11407	7.57405	7.98851	7.94588	8.27394	8.46493	7.02294	7.60364	7.79807	7.4893	7.81198	7.83862
RP11-455F5.5	7.40347	7.33466	7.51949	7.5608	6.9101	7.82999	7.37875	6.64609	9.00656	7.12255	7.53084	7.11196	8.12431	7.87902	6.65331	7.86512	8.4306	7.98244	7.40498	8.02454	8.76765	7.56577	7.49318	7.69156	8.2024	7.79601	7.61642	7.72374	7.10565	7.66515	7.52907	7.42884	8.82691	8.17991	7.20936	6.87612	8.02203	7.13747	7.66817	7.39967	7.43029	7.79055	7.74224	6.84473	7.75758	7.85915	8.11412	8.43782	7.57661
TM4SF1-AS1	7.49622	7.59998	8.75333	7.664	6.96283	7.76617	8.73143	7.92496	7.35359	7.93833	7.69475	7.04349	7.77925	8.02783	6.86163	7.65973	7.75024	7.30088	7.19124	7.3198	8.23077	8.40979	7.58627	8.53812	7.92917	8.19817	7.16519	8.50223	7.25191	9.11102	9.44983	8.07302	7.77316	7.489	8.01747	6.80892	8.25694	6.98223	7.2071	8.39463	7.61652	7.84945	7.93267	6.96294	8.26948	7.71952	7.21034	7.99949	7.79958
RP11-757F18.5	8.85468	9.83601	7.45117	8.7419	7.18042	8.63035	7.58135	8.49806	7.16646	8.06003	7.78856	6.81036	7.87404	8.9972	6.87361	7.85292	8.6777	7.69744	7.7978	7.82208	7.89199	7.90634	7.73864	7.85697	8.02145	7.93048	7.60094	7.29299	7.64414	8.45339	8.0735	8.82391	7.68542	8.75344	7.49607	7.63814	8.06615	7.00641	7.67005	7.64869	7.42105	8.14829	7.89691	7.31256	7.23727	7.73817	7.7192	8.53031	7.84547
RP4-756H11.3	7.7819	8.01803	8.57765	7.60894	8.29284	9.26585	8.0438	7.02619	7.56201	7.30898	7.64816	7.27581	8.72585	8.36491	8.30237	8.15907	8.9735	8.16586	8.04903	8.39996	8.29835	8.46325	7.99353	8.46297	9.07048	8.11191	7.82699	8.27768	8.56106	8.98684	8.51013	8.53275	8.34776	8.33737	7.62526	9.00489	7.8611	7.30073	7.25733	8.33694	9.37383	8.52036	8.26907	7.28283	7.42697	7.8136	9.03153	8.47398	8.6894
RHPN1-AS1	9.80378	7.01052	10.4545	8.62251	7.92676	8.2541	7.46995	7.03481	7.99477	7.45943	7.99986	7.23169	7.80839	8.14354	7.57107	8.24935	8.10975	7.68747	7.37985	7.55748	7.75553	8.82675	7.64462	8.08614	8.74865	7.90291	7.66696	8.46415	7.90722	7.96518	8.47118	9.42111	8.5894	7.58	7.26437	7.20151	8.24524	7.91943	8.30839	8.23715	8.69775	8.09721	8.22858	8.30469	8.40239	7.5918	8.05115	7.89124	7.54769
RP11-666A20.4	8.3542	7.61782	7.41893	8.65217	6.97646	8.07854	8.4947	7.88769	7.03862	7.39368	7.32091	6.79529	7.97927	8.40121	6.5662	7.89657	7.87451	6.88317	7.92766	9.06443	7.43637	7.98821	7.73009	7.57374	7.86275	8.19534	7.48565	7.32285	6.81099	7.86336	7.6339	7.63629	7.19436	7.73455	8.08651	6.88234	8.49543	6.89172	7.84985	7.58437	7.76497	8.29578	8.02003	7.26504	7.13326	7.63966	8.17294	7.68528	7.81553
LOC101927402	8.10597	8.10925	8.92573	7.47489	8.54288	8.49028	7.80001	7.3743	8.38955	7.58033	7.34105	7.36243	8.21702	7.31345	7.63975	7.67699	8.06439	7.91705	7.59959	7.495	8.40729	7.85536	7.95448	8.12628	8.4282	9.33943	7.54507	7.83716	7.43052	8.01179	7.98409	7.6518	7.41143	7.62565	7.22188	7.25495	7.95482	8.34174	7.51942	8.17857	8.35401	8.50827	9.60667	7.75853	7.33142	8.87795	7.66814	8.46832	7.82199
RP11-568N6.1	8.10597	8.10925	8.92573	7.47489	8.54288	8.49028	7.80001	7.3743	8.38955	7.58033	7.34105	7.36243	8.21702	7.31345	7.63975	7.67699	8.06439	7.91705	7.59959	7.495	8.40729	7.85536	7.95448	8.12628	8.4282	9.33943	7.54507	7.83716	7.43052	8.01179	7.98409	7.6518	7.41143	7.62565	7.22188	7.25495	7.95482	8.34174	7.51942	8.17857	8.35401	8.50827	9.60667	7.75853	7.33142	8.87795	7.66814	8.46832	7.82199
KB-1460A1.1	7.49635	7.77755	8.71601	7.68979	6.82998	7.8941	7.42184	7.04605	7.676	7.16273	6.9263	6.50784	8.0347	7.68455	6.61986	7.74452	7.98615	6.83181	7.16385	7.34582	8.00381	8.75846	7.63855	8.36684	8.26197	8.36893	7.30643	8.25603	6.59336	7.66524	7.92143	7.72056	6.85797	7.3677	7.14027	6.89696	8.50731	8.09567	8.18156	8.19525	8.17079	8.05249	8.35018	7.37615	7.30631	7.57577	7.60039	7.94696	7.76654
LINC00641	8.87243	8.14713	7.71256	7.97105	7.16059	8.44754	7.75649	7.86155	8.21935	8.5803	7.34894	7.42802	9.04572	8.7308	7.78922	7.60035	8.82005	8.39568	8.35487	8.37385	8.24409	8.35244	7.95052	8.42202	8.54172	8.49078	7.867	7.60672	7.03103	8.46878	8.01291	8.14809	7.78685	7.62895	7.6428	7.20934	8.43266	7.91854	7.924	8.30557	7.97338	8.28375	8.32822	7.35187	7.83181	8.2621	7.93957	8.53987	8.01144
LOC101927943	7.83794	7.35686	8.18688	7.80051	7.48924	8.91134	7.73193	7.31845	7.77772	7.37023	7.21404	6.52577	8.79565	7.3676	6.61081	7.36543	8.3533	7.56897	7.30426	7.38389	7.87205	7.87579	7.90388	7.81704	8.07833	8.068	7.48226	7.1868	6.9382	7.79651	7.82098	7.92337	6.97162	7.99047	7.07491	6.83707	8.19432	7.35665	7.75223	8.07471	7.66461	8.21271	8.53168	6.80385	7.14202	7.73566	7.4561	8.0088	7.63712
RP11-456K23.1	7.83794	7.35686	8.18688	7.80051	7.48924	8.91134	7.73193	7.31845	7.77772	7.37023	7.21404	6.52577	8.79565	7.3676	6.61081	7.36543	8.3533	7.56897	7.30426	7.38389	7.87205	7.87579	7.90388	7.81704	8.07833	8.068	7.48226	7.1868	6.9382	7.79651	7.82098	7.92337	6.97162	7.99047	7.07491	6.83707	8.19432	7.35665	7.75223	8.07471	7.66461	8.21271	8.53168	6.80385	7.14202	7.73566	7.4561	8.0088	7.63712
CTD-2292P10.4	7.96371	7.71899	8.05063	7.6709	6.99199	7.74462	7.53863	7.1176	7.48658	7.87916	7.10055	6.56867	7.99536	7.38557	6.98685	7.51919	7.78669	7.42757	7.38466	7.41874	7.50712	7.86717	7.55392	8.00734	8.52323	8.29773	7.19616	8.81235	7.03704	8.12853	8.1079	9.5976	7.12703	7.75292	7.13616	6.83829	7.89851	6.8437	7.98576	8.14428	8.29124	7.96517	7.97832	7.52925	8.08994	8.42717	8.06877	7.85925	7.36427
LOC100288181	7.96371	7.71899	8.05063	7.6709	6.99199	7.74462	7.53863	7.1176	7.48658	7.87916	7.10055	6.56867	7.99536	7.38557	6.98685	7.51919	7.78669	7.42757	7.38466	7.41874	7.50712	7.86717	7.55392	8.00734	8.52323	8.29773	7.19616	8.81235	7.03704	8.12853	8.1079	9.5976	7.12703	7.75292	7.13616	6.83829	7.89851	6.8437	7.98576	8.14428	8.29124	7.96517	7.97832	7.52925	8.08994	8.42717	8.06877	7.85925	7.36427
RP11-498C9.16	8.81471	9.14353	8.4946	8.94932	8.14262	9.93934	8.61679	8.57345	9.29929	9.53266	8.52464	10.7831	9.17598	7.54228	8.32594	8.57198	8.61714	8.7524	8.7972	9.15668	8.68652	9.13694	8.47309	8.72494	8.97905	8.93592	8.9974	8.61063	9.92694	9.43122	9.24274	9.0127	9.67718	9.27968	8.84596	9.38815	9.00159	8.4392	8.91553	8.93249	8.96841	8.88995	8.70923	9.65375	9.24533	8.76664	8.25072	9.07164	10.0828
RP11-848P1.3	8.05324	7.91474	8.21305	7.76289	7.90665	9.85757	8.39466	7.1794	7.74181	7.84688	7.06434	6.82282	9.0393	8.00158	7.56873	7.73162	8.39017	7.24021	8.21403	8.24047	8.47356	8.52634	7.84499	8.05125	8.52435	8.03857	8.48239	8.54532	7.44004	8.56152	8.25122	7.68192	7.61103	8.06339	7.4577	8.13778	8.0861	7.35074	7.83015	8.32109	7.86233	8.60055	8.6862	6.96754	7.78897	8.3707	7.70191	8.33857	8.49932
RP11-174G6.1	8.44295	9.57733	8.55857	8.70152	8.18651	9.1303	7.86369	7.25258	7.68316	8.07113	8.61536	7.22111	8.64079	7.98872	7.78046	8.12789	7.90187	7.84688	8.18142	8.64142	8.74183	9.01829	7.49318	8.50431	8.78281	8.89772	8.38069	8.25903	8.69637	8.58272	8.86539	8.28274	9.15676	8.57389	8.17655	8.52778	8.05095	8.31577	8.06154	8.3119	9.09043	7.81194	7.80297	10.5966	7.82983	9.65191	8.12107	7.48989	9.75423
CTD-3099C6.9	9.63652	8.55155	8.56801	7.32543	7.24146	7.95977	7.37875	7.75344	7.74047	7.71145	8.45726	6.59328	8.94164	7.65876	8.15714	7.21999	8.78036	8.04865	7.34442	8.79938	8.26607	7.62458	7.6719	7.76987	8.27738	8.82693	9.03564	7.34772	7.48005	8.08992	8.42322	7.35273	8.38886	7.46253	7.90479	8.28092	8.32841	7.65624	7.29243	8.03311	8.58733	8.63103	8.76867	9.21326	7.25781	8.95577	7.89715	7.62652	7.1885
RP11-235E17.6	9.00466	9.24337	7.46572	8.55181	7.91203	8.39055	9.71008	8.67536	7.57209	7.48376	7.25453	6.96741	7.95244	10.3648	6.83387	8.37978	9.11011	8.19763	7.93411	7.61705	7.85339	7.38383	7.77231	8.03067	8.22609	7.76862	7.52949	7.79499	7.63888	8.07778	9.32499	10.9102	8.59346	7.98767	7.67532	6.88639	7.83311	7.06534	8.77397	7.59323	7.89808	8.81258	7.77064	7.82816	7.19398	7.80046	8.48497	7.97592	8.58166
RP11-67L3.5	8.80007	7.88445	9.20102	8.29404	8.62675	8.50116	7.79253	8.90265	7.94366	8.30552	8.02567	6.78577	9.01207	9.01928	8.66097	8.24291	8.51947	8.01387	7.49048	8.54485	8.1346	9.90111	7.59136	8.92177	8.36951	8.17467	9.65939	8.53535	8.30997	8.79871	8.59762	8.03012	8.70984	8.93391	8.54821	7.89938	8.23387	8.36958	7.95215	7.97294	8.78575	8.76797	8.02224	7.99173	8.18668	8.95941	7.66086	8.36171	8.09686
RP11-678G14.2	7.40347	7.8209	9.0381	7.2537	6.84434	7.73279	7.37875	7.16789	7.50803	7.12255	6.97111	6.50784	7.83483	7.82816	6.5662	7.03912	7.98849	7.1633	7.20848	7.76845	7.43915	7.62487	7.65908	7.46448	8.1701	8.72542	8.27242	7.20933	6.53071	7.54336	7.44695	7.22317	7.02956	7.46593	7.11732	6.75617	7.78314	6.8437	7.00372	8.07877	8.28298	7.37897	7.8561	7.8723	6.99868	8.15401	7.82903	7.38642	7.1692
RP11-530N7.3	8.01745	9.10997	8.01675	7.47285	7.27228	8.0155	7.46893	7.14219	7.27739	7.33114	7.87399	7.36141	7.75322	8.2335	7.0645	7.19538	8.03375	7.31451	7.24173	7.52818	8.73799	7.59806	8.20634	8.10116	8.01646	8.16745	7.31864	8.75098	7.46266	8.31507	8.07806	8.97187	7.73764	8.25559	7.32826	6.94346	7.75061	6.91907	8.71603	7.44278	7.88677	7.87327	7.77916	6.95619	7.63869	8.22918	7.62845	7.82809	8.57406
RP11-706O15.5	8.19347	7.06421	7.58404	8.17908	7.01979	8.08218	7.46603	6.69074	7.015	7.22747	7.38421	6.65024	7.67168	7.37204	6.61142	8.00192	7.69939	7.24656	6.96006	7.26238	7.2922	7.64182	7.69315	7.3956	7.6875	8.54383	7.25908	8.20497	6.74247	8.14061	7.97077	7.22941	6.90982	7.72967	6.86327	6.75486	8.18502	7.87734	8.35442	8.35898	7.20108	8.34152	8.27062	8.29357	7.13899	7.82528	7.96299	7.44016	7.29618
KDM4A-AS1	7.97463	9.5406	8.34819	7.98407	7.25238	7.91206	7.44902	7.49877	7.50525	7.87715	8.09662	7.33723	7.8732	8.40976	8.12166	8.7932	8.25629	7.81292	7.1616	7.93244	8.34619	8.35823	8.01233	8.73453	8.57622	8.0674	7.80836	8.43369	7.42492	8.29797	9.79546	8.1622	8.13147	7.86445	8.20501	7.49166	8.08745	7.32418	8.19587	8.93345	8.97002	7.99277	8.0406	9.20926	7.83424	7.95251	7.51908	8.395	8.03871
AC034243.1	7.40347	7.09793	7.50902	7.99403	6.77413	8.51089	7.37875	8.20646	7.12462	7.92962	6.89997	6.7182	8.36254	7.19102	6.70247	8.60818	7.94508	6.74506	7.35824	7.29063	7.58009	7.5779	8.37586	7.72397	8.00317	8.19	7.10317	7.37684	6.66013	7.4211	7.46938	8.98592	7.75788	7.40017	6.83663	6.80612	7.73886	7.13018	7.16254	8.10486	7.21603	7.91184	8.34406	6.95539	7.36622	7.74756	7.03728	7.53268	7.32673
LOC105379194	7.40347	7.09793	7.50902	7.99403	6.77413	8.51089	7.37875	8.20646	7.12462	7.92962	6.89997	6.7182	8.36254	7.19102	6.70247	8.60818	7.94508	6.74506	7.35824	7.29063	7.58009	7.5779	8.37586	7.72397	8.00317	8.19	7.10317	7.37684	6.66013	7.4211	7.46938	8.98592	7.75788	7.40017	6.83663	6.80612	7.73886	7.13018	7.16254	8.10486	7.21603	7.91184	8.34406	6.95539	7.36622	7.74756	7.03728	7.53268	7.32673
RP4-668J24.2	7.6029	7.04829	7.43124	8.57727	6.87201	8.58687	7.71373	7.21428	7.6852	7.68878	8.15949	6.6307	8.51562	7.4002	6.66871	7.14638	7.73119	7.11597	7.51839	7.47047	7.44288	7.62872	7.74634	7.97844	8.14068	8.54469	7.88053	7.7645	7.26852	7.55295	7.81924	8.02112	7.055	7.67869	7.01961	6.64504	8.24584	7.25731	8.50829	8.36462	8.15078	7.91633	8.73045	7.00481	7.3397	7.49355	7.87116	8.19108	7.33289
AC128709.4	7.79367	8.23463	8.11867	7.3132	9.26349	7.65957	7.93322	7.27156	7.20171	7.12927	8.68481	7.31337	7.73656	7.49681	7.31475	7.31314	7.47433	9.18616	8.09428	7.81005	7.69985	7.86775	7.49318	8.87465	7.98237	8.07408	7.26162	7.44796	8.39862	8.10112	7.51559	7.66137	8.37544	7.55457	9.90907	7.29852	7.81523	9.23984	7.77007	8.75165	7.93283	8.14395	7.67945	8.05287	7.28211	9.48716	7.07981	7.43688	7.36895
CTD-3184A7.4	8.66845	7.94635	9.32809	9.5948	8.72821	9.68751	9.68675	9.30641	9.95676	9.15359	10.0825	8.01114	9.1268	9.67011	8.42036	9.36501	9.29494	9.64875	9.15378	8.36404	8.83958	8.61721	8.77996	8.60255	9.28265	8.91579	9.30099	8.80844	9.234	8.61578	8.95291	9.27206	8.9731	9.29718	9.11489	8.64422	9.2115	8.94802	8.3035	8.95126	9.3368	9.49676	10.2556	9.19311	10.3498	8.66767	9.26675	8.77917	8.888
MHENCR	8.66845	7.94635	9.32809	9.5948	8.72821	9.68751	9.68675	9.30641	9.95676	9.15359	10.0825	8.01114	9.1268	9.67011	8.42036	9.36501	9.29494	9.64875	9.15378	8.36404	8.83958	8.61721	8.77996	8.60255	9.28265	8.91579	9.30099	8.80844	9.234	8.61578	8.95291	9.27206	8.9731	9.29718	9.11489	8.64422	9.2115	8.94802	8.3035	8.95126	9.3368	9.49676	10.2556	9.19311	10.3498	8.66767	9.26675	8.77917	8.888
PSMG3-AS1	7.91947	8.32171	7.96182	8.50004	7.16547	8.40108	7.51389	7.34235	8.0685	7.57869	7.16738	6.64486	8.63533	7.73268	7.15639	7.62742	8.18364	7.33193	7.4737	7.77454	8.45054	8.49992	7.99038	8.45588	8.21347	8.16369	7.80488	8.60366	7.62636	7.87243	7.91663	7.73924	7.24916	7.65226	7.16804	7.00207	8.20275	8.15519	8.0305	7.94254	7.59906	8.15108	8.62403	8.10294	8.35894	8.0923	7.74782	8.0456	7.51212
LINC00319	8.7656	8.33291	7.79003	9.04353	7.11039	8.74711	8.37153	7.86384	7.50345	7.51292	7.49979	6.54271	8.36358	7.96463	7.50745	7.60465	8.33025	7.11945	7.60022	8.01289	7.92971	8.62049	7.77048	8.27574	8.70952	8.35464	8.22125	7.49856	6.87888	7.82837	8.22967	7.94539	8.14057	7.70631	7.97117	8.10332	8.15432	7.32645	8.21103	8.00939	8.23032	8.15683	8.30478	9.06023	7.10969	7.7229	7.44806	7.57601	9.13271
RP11-567M16.2	8.27425	6.87406	8.60379	7.30964	6.91089	7.8549	7.57111	6.65026	7.07974	7.12255	7.64585	6.50784	8.30812	7.36268	6.5662	7.2765	7.8336	7.15204	7.5372	7.39023	9.71532	8.83437	7.6092	7.43793	8.18913	7.58133	7.10317	7.16796	6.82313	7.98167	7.70504	7.86711	8.56268	7.61059	7.07338	6.98676	7.77513	7.79356	7.01205	7.35373	7.69049	8.80246	8.96984	8.23002	7.09813	8.54291	7.03728	8.63407	7.1692
LOC102723766	7.48942	6.92741	7.60463	7.30481	7.34827	8.83484	7.65422	7.33267	8.62702	7.23469	7.01421	6.72058	8.25919	8.11714	6.64001	7.87398	8.28764	7.93887	7.47926	7.82786	8.22646	7.42439	7.93965	8.29166	8.17114	8.33401	7.13286	7.43916	6.62951	7.48281	7.39631	7.36075	7.3584	7.70315	7.77012	6.73877	7.98262	7.24726	7.31378	7.8831	8.96522	8.89307	8.26807	6.87962	7.1103	7.94608	7.34943	9.33059	7.44114
RP11-290F5.1	7.48942	6.92741	7.60463	7.30481	7.34827	8.83484	7.65422	7.33267	8.62702	7.23469	7.01421	6.72058	8.25919	8.11714	6.64001	7.87398	8.28764	7.93887	7.47926	7.82786	8.22646	7.42439	7.93965	8.29166	8.17114	8.33401	7.13286	7.43916	6.62951	7.48281	7.39631	7.36075	7.3584	7.70315	7.77012	6.73877	7.98262	7.24726	7.31378	7.8831	8.96522	8.89307	8.26807	6.87962	7.1103	7.94608	7.34943	9.33059	7.44114
RP11-33B1.4	8.60466	8.32171	8.4012	8.21219	7.84399	8.37777	7.44405	7.79106	7.62338	8.41171	7.97457	6.54861	8.51421	8.97951	7.72142	7.7252	9.22996	8.51925	7.91463	8.513	8.44634	8.49896	8.49253	8.61104	8.99826	8.2942	8.17724	8.54332	8.21862	8.40016	9.17738	8.64602	7.92894	7.79395	7.7897	7.42813	8.09524	8.00067	8.53133	8.1308	8.81667	8.55628	8.67963	8.51532	8.09895	8.23178	8.63699	8.16835	7.91866
CDIPT-AS1	7.79498	6.91269	9.90742	7.67303	6.83071	7.67206	7.41786	6.66803	8.08434	9.14018	9.40497	7.21846	7.73826	7.36839	8.10915	9.16741	7.73243	7.94647	6.94534	10.1971	8.13363	9.19461	7.52389	7.47959	8.09463	8.41001	7.16789	7.46676	8.33516	7.42155	7.75512	7.64448	7.57425	8.20382	7.49135	8.8135	7.83828	8.44061	7.53618	7.48455	7.33702	7.2978	8.0028	10.1722	8.36268	10.6469	7.17416	7.78218	7.50389
LOC101929504	7.62896	9.94306	7.50491	8.76899	6.78467	7.95398	7.66717	7.10697	7.29889	7.53593	7.49148	6.50784	7.95701	7.28524	6.69162	7.11587	7.59454	7.044	7.12192	7.96467	7.4928	7.93848	8.00091	7.77511	7.60639	7.72742	7.59711	7.22354	6.59763	8.48433	7.60103	7.81219	6.85797	7.35217	6.87443	6.93654	8.20244	6.8437	7.05482	7.51032	7.53397	7.4085	7.7543	6.89921	7.2089	7.39113	7.14004	7.83742	7.39334
RP11-417E7.2	7.62896	9.94306	7.50491	8.76899	6.78467	7.95398	7.66717	7.10697	7.29889	7.53593	7.49148	6.50784	7.95701	7.28524	6.69162	7.11587	7.59454	7.044	7.12192	7.96467	7.4928	7.93848	8.00091	7.77511	7.60639	7.72742	7.59711	7.22354	6.59763	8.48433	7.60103	7.81219	6.85797	7.35217	6.87443	6.93654	8.20244	6.8437	7.05482	7.51032	7.53397	7.4085	7.7543	6.89921	7.2089	7.39113	7.14004	7.83742	7.39334
LINC01271	8.16064	6.8693	8.61122	8.47931	6.79917	8.10537	7.54292	6.96917	7.20988	7.43397	7.26518	6.5243	7.90573	7.92627	6.72419	8.19452	7.89277	7.05266	7.39913	7.54604	7.57939	8.13692	7.75153	7.80159	7.9597	7.68998	7.80946	7.92604	6.68236	7.61199	7.34858	8.41074	7.00773	8.05128	7.05707	6.95134	8.46941	7.34192	7.14363	7.66653	7.35446	8.12984	8.12161	6.91474	7.96857	7.42737	7.30005	7.97301	7.53019
RP11-774O3.3	8.00084	8.13901	7.8553	8.03632	7.86916	8.64279	7.62509	7.60816	8.38896	7.73175	7.36155	7.165	8.49004	7.81535	6.83962	7.66573	8.63622	7.83285	7.35018	7.85055	8.41385	8.08978	7.83354	8.31198	8.50623	8.43185	7.93375	8.46821	7.89931	8.69848	8.47339	7.74379	7.33152	7.87623	7.69451	6.8435	8.20174	8.09726	8.33256	8.62146	8.39928	8.3113	8.97234	7.00075	7.92958	8.09908	8.79038	8.34282	7.89848
LINC00582	7.50837	6.7537	7.5999	7.25971	6.89645	8.70372	7.37875	6.78018	7.89769	7.12255	7.01115	6.68386	7.89927	7.39473	6.5662	7.337	7.63076	7.50786	7.19556	7.75214	8.25213	7.41732	7.74592	7.69575	8.55361	8.31699	7.15821	7.85863	6.57962	7.38361	7.31295	7.22317	7.11914	7.31495	7.43281	6.62298	7.75618	7.09912	7.2507	7.52032	8.13979	7.89372	7.90545	6.78151	7.08288	8.24941	7.12153	8.13073	7.33932
LINC01629	8.32902	6.74179	7.5565	8.28718	8.44406	8.14058	7.4788	8.13013	7.68405	7.17718	7.58903	7.72251	7.66289	11.2581	8.94374	7.22864	7.57741	7.29449	7.64825	8.16517	8.48209	7.96701	7.70567	7.41327	7.43628	7.70441	9.15333	7.13203	7.47605	7.38496	7.3993	7.2881	6.85797	7.31495	7.93483	10.1072	8.558	6.87915	7.47121	7.93341	7.20151	7.52776	8.78077	6.78235	7.02437	7.46092	7.07486	7.38642	7.91956
LOC105369748	8.25559	7.58856	7.99648	7.98532	7.07083	8.30319	7.96311	7.2008	7.95332	7.48822	8.94548	7.05963	8.43308	8.1956	7.59742	8.6169	8.07488	7.34622	7.4934	7.69614	8.47998	8.02007	8.35989	8.02625	8.45108	8.38765	8.01427	8.3401	7.19647	8.56273	7.90477	7.90479	7.90716	8.34358	7.78462	7.52848	8.0416	7.26866	7.37802	7.99229	8.12139	8.59986	7.99227	7.39923	7.97186	8.39594	7.6501	8.1614	8.09101
RP1-197B17.3	8.25559	7.58856	7.99648	7.98532	7.07083	8.30319	7.96311	7.2008	7.95332	7.48822	8.94548	7.05963	8.43308	8.1956	7.59742	8.6169	8.07488	7.34622	7.4934	7.69614	8.47998	8.02007	8.35989	8.02625	8.45108	8.38765	8.01427	8.3401	7.19647	8.56273	7.90477	7.90479	7.90716	8.34358	7.78462	7.52848	8.0416	7.26866	7.37802	7.99229	8.12139	8.59986	7.99227	7.39923	7.97186	8.39594	7.6501	8.1614	8.09101
LINC01063	7.78234	8.86914	8.12972	7.57267	7.1457	7.74699	7.37875	7.27252	7.91991	7.9802	7.7078	6.70748	7.79708	7.69075	6.5662	8.36091	7.66005	7.14083	6.94534	7.652	7.80091	9.5922	7.82441	9.31606	7.85577	8.87851	7.4365	8.9827	7.30093	8.14199	8.72227	8.71956	7.66681	7.50377	7.36464	7.22816	8.97633	7.23683	8.81611	8.95023	7.98277	8.18327	8.005	7.86475	8.59567	7.73753	7.80608	8.16771	8.15006
AP001610.5	7.40347	7.95358	7.81788	7.73591	6.95984	8.36271	7.44166	7.686	7.22207	7.30492	6.84898	6.50784	7.82493	9.79261	6.94506	7.82584	7.95813	7.92558	6.94534	7.24654	7.59204	8.49349	7.75698	7.34871	8.34452	7.72928	7.40844	7.64149	6.89965	7.7842	8.24357	7.90126	7.08109	8.63256	7.76508	6.77119	7.84355	6.84925	7.83749	7.58568	7.93984	7.83358	7.62438	8.82341	6.99868	7.78398	7.98237	7.54509	7.56149
SERHL	9.02775	8.60246	9.41842	8.35051	7.31795	8.21151	7.79997	7.56884	8.80265	8.31957	7.68965	7.21283	7.83474	8.74562	7.18264	8.73663	8.34324	7.9492	7.74903	8.11663	8.54045	7.70051	7.749	7.98197	8.24004	7.96834	7.64652	7.45424	7.19531	8.21571	8.13273	9.42699	8.51099	8.39882	7.2872	7.64691	8.03723	7.42807	8.30649	7.66037	8.34814	7.79231	8.12335	7.56274	7.2482	8.37659	8.14881	8.20788	7.93827
LINC01967	8.48314	7.98852	7.42087	7.76985	7.12925	7.79615	7.37875	7.44325	7.80247	7.76307	7.08407	6.68868	9.3062	7.5616	7.18499	7.04159	8.07601	7.44186	8.14388	7.75434	7.72328	8.00643	8.55493	8.01826	7.90973	7.77592	7.47396	7.24413	6.54807	8.09511	7.84547	7.78533	6.85797	7.31495	7.03681	7.36512	8.05322	6.99816	8.07868	8.03295	8.75538	8.66287	7.73135	6.97059	7.19441	7.73088	7.64512	7.69138	7.65514
AF131215.9	7.75282	8.29031	7.65989	7.78808	7.85022	8.21218	8.58287	7.34467	8.25988	7.26031	6.93138	6.77705	7.89727	7.84386	7.5986	7.99412	8.20836	8.1166	7.13187	7.45701	8.59979	7.76614	7.70999	8.72206	8.09789	8.51375	7.23044	7.82094	7.29574	8.1879	7.45187	7.31771	7.3861	7.90613	7.87552	6.75675	8.01074	7.15835	7.21169	7.76032	8.69082	7.94574	8.20404	8.08191	7.68614	7.62055	7.34836	8.17122	7.40912
RP11-190J1.3	7.40347	6.65749	7.52354	8.41752	8.85751	7.63781	7.37875	6.64609	6.9972	7.12255	6.9065	8.26022	8.22797	8.02796	8.04866	7.03912	7.91163	8.18462	7.00672	8.61491	7.24231	7.35122	7.49318	7.36022	7.50811	7.58133	8.66457	7.17703	7.29628	7.33388	7.27173	8.87033	8.67068	7.31495	9.17815	9.08993	7.6844	8.52176	7.00372	7.32499	7.22757	7.23459	7.62438	8.6208	6.99868	8.35498	7.71894	7.38642	8.85082
AC098820.4	7.40347	6.97502	7.77431	7.79328	6.72382	8.36517	7.97142	6.97876	7.40149	7.12255	6.92701	7.24819	7.87609	7.76261	6.5662	8.07209	7.5268	6.89146	6.94534	7.46556	7.4368	8.56926	7.66257	8.41727	7.71036	7.84842	8.10912	7.42997	6.77833	7.44475	7.73989	7.64433	7.4204	7.46912	7.34908	6.78987	7.80018	6.8437	7.15733	7.86001	7.73174	7.77901	8.14201	6.99231	7.0719	7.39161	7.24235	7.56509	8.33146
LOC100288846	8.21409	7.12172	8.42623	7.48136	7.01278	8.24334	7.37875	7.69826	7.08577	7.24292	7.76903	6.67979	8.46238	8.13643	6.84083	7.63528	8.18581	8.05444	7.62352	8.0093	8.43093	7.49252	7.97542	8.554	8.54702	8.68781	7.53711	7.67147	7.48186	7.92744	7.82066	8.24519	7.07945	7.72869	6.83663	7.00157	8.4646	7.77226	7.89008	8.47008	7.52667	7.86315	8.21231	7.0556	7.29261	7.44133	8.71193	7.57248	8.43367
RP11-407N17.5	8.21409	7.12172	8.42623	7.48136	7.01278	8.24334	7.37875	7.69826	7.08577	7.24292	7.76903	6.67979	8.46238	8.13643	6.84083	7.63528	8.18581	8.05444	7.62352	8.0093	8.43093	7.49252	7.97542	8.554	8.54702	8.68781	7.53711	7.67147	7.48186	7.92744	7.82066	8.24519	7.07945	7.72869	6.83663	7.00157	8.4646	7.77226	7.89008	8.47008	7.52667	7.86315	8.21231	7.0556	7.29261	7.44133	8.71193	7.57248	8.43367
LINC00273	7.45227	6.93912	7.63965	7.36786	7.19398	7.6997	7.58893	6.6576	7.52578	7.42312	6.87231	6.99247	7.76041	8.00961	6.59823	7.13973	7.89406	7.54533	7.4311	8.1387	7.56316	7.93246	8.23474	7.99237	7.76905	7.7311	7.37524	7.51006	7.04618	7.63974	7.44913	7.46987	6.89087	7.72158	6.85086	6.60167	7.85332	6.8437	7.05031	7.53102	7.65168	7.31835	7.68124	8.17455	8.21091	7.6258	8.34349	8.3265	7.64906
TMEM147-AS1	9.2454	9.39382	8.25806	9.06126	8.66084	8.50264	7.81959	8.34564	9.08733	7.72204	8.00652	8.02221	8.39346	9.4824	7.85632	9.08463	8.82314	8.8218	8.08534	8.23781	9.54131	8.65364	7.8805	8.82063	9.5292	9.01644	8.62823	9.50357	8.76402	8.53949	8.75805	8.98448	9.63609	9.11007	9.22278	8.42298	8.29916	7.53418	8.73304	8.89179	8.68879	9.57373	9.80007	9.50062	8.50336	9.16454	8.9472	8.87392	8.67448
MKLN1-AS	7.96571	7.40797	8.30344	7.74339	7.48391	8.66815	7.83216	7.3759	7.43268	7.52364	7.692	6.64922	8.79412	8.12415	7.38072	7.64053	8.22179	7.31712	7.66539	8.41634	8.04277	8.6307	8.86033	8.32208	8.1527	8.37374	7.53092	8.00676	7.34368	8.05787	8.05431	7.69265	7.76352	7.91777	7.56885	7.78002	8.27394	7.68008	7.46624	8.45264	7.8127	8.13923	8.37067	7.19956	7.60487	7.98776	7.42228	7.63622	8.22592
CTD-3099C6.11	7.77184	8.39113	9.03666	7.36415	7.15729	8.05288	7.37875	7.82477	7.97719	7.77309	8.66211	6.64566	7.83102	7.41903	7.7139	7.34959	8.52098	7.49344	7.53369	7.71969	9.08186	7.50002	7.76849	7.85551	8.45011	8.31783	7.73594	7.46087	7.42166	8.39056	9.02681	7.45511	8.956	7.60068	8.1363	8.02126	7.87231	7.80554	7.24957	7.87466	8.27302	8.87038	8.22667	8.43257	8.01595	8.62949	7.36687	7.50705	7.21153
RP11-575F12.2	7.70707	6.89734	7.91427	7.95901	6.8036	7.74083	7.37875	8.10483	7.55404	7.78637	6.93964	6.57913	7.74023	7.89135	9.39965	7.49043	8.21302	7.87031	7.09649	9.94849	7.36212	7.44121	7.74747	7.68274	7.54133	7.6774	9.86396	8.02153	6.83478	8.42278	8.11739	7.90095	6.89707	7.60063	7.05573	8.23291	7.76326	6.99488	7.5545	8.09809	7.81651	7.85434	8.03544	7.05637	6.99868	7.32333	7.07872	7.87461	7.74424
RP11-445N18.5	7.48614	6.74964	7.41893	7.27655	6.9289	7.63781	7.37875	6.68604	7.08722	7.12255	7.21371	6.50784	9.46857	7.67674	6.5662	8.78071	7.53678	7.00718	7.15922	7.69009	7.5467	7.39916	7.53655	7.7126	9.47955	8.41496	8.46086	7.17127	6.65528	7.90729	9.05525	8.11176	6.85797	7.31495	6.83663	6.83285	7.74804	7.20461	7.14986	8.06727	7.75271	7.95139	7.77377	7.23129	7.85275	7.45754	7.03728	7.38642	7.26909
AC002398.11	8.83601	7.56844	7.86105	8.25467	7.51965	8.3052	8.9297	8.4325	8.40684	8.588	7.72807	8.23071	8.34516	7.97726	7.66858	8.67912	8.72729	7.93125	7.80309	7.99771	7.80214	8.80621	8.22296	8.54966	8.11029	8.32384	8.31622	8.34305	7.4102	8.00247	7.87416	7.6828	8.3448	9.48206	8.41435	7.54988	8.8638	7.45454	7.64128	8.13502	7.59979	8.4557	9.07319	7.55206	8.57347	8.98421	7.59828	8.43977	8.05889
RP11-50C13.1	8.22185	8.34935	8.11186	8.26257	7.64039	9.38604	8.38846	7.78199	8.44405	8.43451	8.29594	7.84248	8.72452	7.73698	7.65659	7.91795	8.76983	7.99739	7.95548	8.46968	8.93743	8.92027	8.78705	8.42534	8.5246	8.83622	7.58241	8.49851	7.71439	9.28917	8.8458	7.89858	8.57746	9.2565	8.02982	7.98117	8.78561	7.88793	8.24423	8.6431	8.6397	8.35253	8.24712	8.76461	8.46525	8.30133	7.90642	8.7973	8.46332
AC017002.1	8.09091	7.86156	7.70952	7.80749	7.56046	8.40716	7.45615	7.04318	8.405	7.62929	7.29223	7.32957	8.1517	8.27989	7.4953	7.83724	8.31921	7.72425	7.78738	7.91873	8.45999	8.06735	8.87564	7.78699	8.14815	8.44545	8.4474	7.97913	6.79849	9.11304	7.80852	8.00617	7.69189	8.7515	8.28441	6.88985	8.66336	7.77316	7.74007	8.29543	8.22646	7.98986	8.22369	6.94601	8.58549	7.62945	7.95619	8.58458	7.66015
RP11-334C17.5	8.7969	8.22508	7.72432	8.6467	7.57769	8.19744	7.66145	7.92908	7.98571	7.74459	7.1385	6.51813	7.91909	8.00731	6.80744	8.14845	8.43028	8.04114	7.30891	8.04175	8.55027	7.69659	7.49318	8.566	8.77681	7.77846	7.4794	8.49301	8.1513	8.13075	8.32936	9.19486	8.76939	8.79185	7.96083	7.20201	8.00939	7.08359	8.06852	7.9088	8.24341	8.21741	8.03192	6.9622	7.11549	8.05906	8.71263	7.94487	7.69128
OR2A1-AS1	8.46533	9.28942	8.90069	8.31603	9.44665	8.01033	8.53309	8.60801	8.25374	8.97918	9.02539	8.82396	8.50678	8.42771	8.93927	8.35971	9.12134	8.56802	8.20984	8.88708	11.3447	8.78333	9.34606	10.8482	9.32864	8.93472	8.4421	10.6174	7.80154	9.49077	9.6784	9.71207	8.76642	8.8561	9.5521	8.7882	8.53666	8.4949	9.74783	8.72016	8.43584	8.94029	8.98138	9.06486	8.18828	9.66696	8.45548	8.49096	8.2531
RP11-66B24.2	8.36705	7.10275	7.51612	8.42612	7.47429	7.9561	7.96235	7.12813	7.44756	7.66031	6.93221	6.52751	7.68868	8.05892	6.5989	8.39564	8.16891	6.84053	7.31638	7.24654	7.63754	8.05448	8.09397	8.18624	7.78803	7.60286	8.12913	7.40763	6.57093	7.39945	7.7506	8.60526	6.89402	8.02305	7.21421	6.61723	8.46104	7.69384	7.14383	7.81759	7.89466	7.70138	8.00815	6.82595	7.58295	7.38252	7.48514	7.98859	7.82165
CRNDE	9.34666	9.81323	8.8101	9.1618	9.21337	9.77756	9.98544	9.74418	8.63118	9.5832	9.76919	9.51872	9.36141	9.08367	8.99237	9.91442	9.58301	8.96509	8.74082	8.26023	9.17953	10.1396	9.40371	9.41461	9.63391	9.59138	9.47756	9.5395	8.48523	9.6939	10.0356	9.66956	9.3129	10.4334	9.32283	8.73263	9.45055	8.84707	9.1404	9.88888	10.1571	10.0151	10.0376	8.80506	9.96713	9.33809	9.47314	9.62519	9.08496
LOC101927480	9.34666	9.81323	8.8101	9.1618	9.21337	9.77756	9.98544	9.74418	8.63118	9.5832	9.76919	9.51872	9.36141	9.08367	8.99237	9.91442	9.58301	8.96509	8.74082	8.26023	9.17953	10.1396	9.40371	9.41461	9.63391	9.59138	9.47756	9.5395	8.48523	9.6939	10.0356	9.66956	9.3129	10.4334	9.32283	8.73263	9.45055	8.84707	9.1404	9.88888	10.1571	10.0151	10.0376	8.80506	9.96713	9.33809	9.47314	9.62519	9.08496
LOC100507291	8.91917	8.71464	8.66844	8.02555	7.73328	8.34729	7.63916	7.95881	7.68617	7.82923	7.73788	7.04002	8.07458	8.24119	7.53588	8.77646	8.08986	7.51694	7.59464	7.95625	8.46054	8.2671	8.09643	8.28159	8.61465	9.00416	7.50569	8.77396	8.01249	7.93219	7.76026	8.58363	8.23556	7.90789	7.3979	7.72592	8.4361	8.30153	7.61349	8.5846	8.09867	8.46172	8.50962	7.36568	8.75176	8.96281	8.88714	8.59204	7.96683
RP11-319G6.1	8.91917	8.71464	8.66844	8.02555	7.73328	8.34729	7.63916	7.95881	7.68617	7.82923	7.73788	7.04002	8.07458	8.24119	7.53588	8.77646	8.08986	7.51694	7.59464	7.95625	8.46054	8.2671	8.09643	8.28159	8.61465	9.00416	7.50569	8.77396	8.01249	7.93219	7.76026	8.58363	8.23556	7.90789	7.3979	7.72592	8.4361	8.30153	7.61349	8.5846	8.09867	8.46172	8.50962	7.36568	8.75176	8.96281	8.88714	8.59204	7.96683
IL10RB-AS1	8.05362	8.34023	9.14803	8.3332	9.07407	8.81406	8.01595	7.85125	8.28842	8.54464	7.5716	7.93546	8.27529	8.42533	8.47579	8.24816	8.53633	8.22313	8.45362	8.94856	8.86056	8.93171	8.90637	8.24403	8.73791	8.64755	8.67136	8.29305	9.48254	9.45202	8.18828	7.9427	9.67401	8.6048	8.36826	8.13279	8.80845	9.47023	8.06705	8.7667	8.24621	8.87303	8.67047	7.89478	8.46587	10.2795	8.12902	9.53864	7.84668
RP11-1277A3.1	8.41227	8.69957	8.29318	8.66206	7.17144	8.01609	7.51008	7.68934	8.33295	8.31333	7.42429	6.9224	8.12264	9.18948	7.23397	8.83207	8.73428	7.98879	7.6858	8.27393	9.0186	8.74365	8.09774	8.61031	8.67961	8.37397	7.89241	8.44845	7.66742	8.69893	8.68172	8.64597	8.40735	8.11751	7.32201	7.18168	8.16334	7.21811	8.49097	8.13053	8.40267	8.45844	9.04252	8.18643	8.51752	8.51929	8.02454	8.73678	7.44331
RP3-395M20.12	8.40262	6.979	7.88328	8.38335	9.72319	8.45304	10.4776	10.0014	8.99312	7.63152	7.95524	7.09815	9.15171	8.14371	7.12639	7.69287	8.65605	7.70187	8.8557	7.99983	8.79329	8.37398	8.16366	8.13186	8.59532	9.09519	8.18914	7.93801	7.97431	8.40235	8.03543	7.78431	8.02177	8.28134	8.07297	7.87594	8.88525	7.53031	7.55236	8.20353	8.55264	8.78651	8.51094	7.28043	8.42465	7.97533	8.35658	8.16991	9.05541
AP001258.4	8.54034	8.7934	8.55393	8.46671	7.29508	8.60921	7.54822	7.96898	8.06316	8.15351	7.94846	7.29088	8.67923	7.81847	7.7608	8.92191	8.86166	8.2249	8.4138	8.13303	8.94569	9.46907	8.85564	8.76663	8.96216	8.81609	8.35786	8.83127	8.20505	8.64794	8.08156	8.16154	8.81668	8.64676	7.84653	7.88833	8.569	8.15616	9.00978	8.80189	8.5214	8.32085	8.71485	8.49916	8.78011	9.3876	8.74315	8.72618	7.68375
LOC101927204	8.54034	8.7934	8.55393	8.46671	7.29508	8.60921	7.54822	7.96898	8.06316	8.15351	7.94846	7.29088	8.67923	7.81847	7.7608	8.92191	8.86166	8.2249	8.4138	8.13303	8.94569	9.46907	8.85564	8.76663	8.96216	8.81609	8.35786	8.83127	8.20505	8.64794	8.08156	8.16154	8.81668	8.64676	7.84653	7.88833	8.569	8.15616	9.00978	8.80189	8.5214	8.32085	8.71485	8.49916	8.78011	9.3876	8.74315	8.72618	7.68375
PIK3CD-AS2	8.2019	8.50049	7.98234	8.66129	8.00758	8.54586	9.33416	7.8217	8.25969	8.68633	8.05361	7.23854	8.41102	8.19685	8.3524	10.1246	8.21533	7.21744	7.76723	8.00157	8.57335	8.39102	8.46466	9.42333	8.49031	8.222	9.55666	9.20502	6.70433	7.87796	8.47922	9.23836	7.57912	8.64945	8.01936	8.03231	9.20216	8.55757	8.88224	8.26175	8.25769	8.89851	8.38558	8.53439	8.42865	8.2796	7.46391	9.40157	9.18413
RP11-70P17.1	8.5655	8.02327	7.48286	8.43901	7.18236	8.28529	8.33232	7.17609	7.56271	7.92631	7.09553	6.74989	8.01531	8.32169	7.3059	8.68481	7.97286	7.55721	7.40638	7.38597	7.44363	7.96869	8.15796	7.57641	7.78749	8.27264	7.31009	7.54402	6.64872	7.72919	7.70594	8.10795	7.34945	8.46498	6.9361	6.8332	8.62706	7.20116	7.44516	7.74245	7.93091	7.92052	8.20206	7.21163	7.65229	7.55843	7.34222	8.38326	7.24815
RP11-656D10.6	7.91301	8.72823	8.28136	8.34036	7.54663	7.91789	7.80922	7.50124	7.56126	8.57468	7.7232	7.57711	7.81744	7.8329	7.03189	7.92003	7.80201	7.74608	7.52107	8.40713	7.71924	7.91783	8.1908	8.3406	7.63726	8.34568	7.71485	8.47485	7.24206	8.46642	7.97915	7.54057	7.60452	7.74139	8.18464	7.43993	7.91263	7.48718	8.40529	8.1529	8.23973	8.06774	8.22991	8.11719	8.14144	8.9579	7.70066	8.29401	8.04295
RP11-802E16.3	7.88718	9.24956	7.73652	9.04519	7.44037	8.61687	8.13565	8.34497	8.00265	8.12916	8.3354	6.90654	8.09297	8.7108	7.94856	9.09786	9.17756	8.46617	7.99884	8.15371	8.29549	8.41482	8.59574	8.34527	8.00055	7.63982	8.60157	7.83845	7.11107	8.53905	9.35557	9.61011	8.37143	8.10482	8.11519	7.81887	8.11938	7.26773	8.03589	8.26955	8.0456	8.47691	8.23886	8.52856	8.15607	8.46004	7.9617	8.20284	7.98118
LINC00339	10.7918	10.807	10.7956	10.2669	9.35148	10.5521	9.33176	10.0106	10.8901	9.24254	10.4677	9.60387	10.0776	10.4089	9.26201	10.8673	10.4972	9.80209	9.50325	9.17163	10.2774	10.0166	10.302	10.5779	11.0454	10.3766	10.2658	10.3244	9.97844	10.1224	10.0567	10.1189	10.5882	10.2616	9.78612	9.66604	10.6582	10.9069	10.2149	10.5186	10.0237	10.4866	10.9465	10.5526	10.9944	11.1591	9.90482	10.7488	10.2589
RP11-38L15.3	8.42264	7.51235	7.67324	8.60026	6.91923	7.73461	7.4449	7.77969	7.36824	7.45241	7.04223	6.62006	7.96745	7.78767	6.70195	8.28284	7.87893	7.24692	7.14323	7.75741	7.70139	9.1175	9.66495	7.55027	8.24576	8.20003	7.44956	7.67202	6.94914	7.89222	7.66363	7.54934	6.91779	8.54151	7.39671	7.00429	7.97801	7.01698	7.22082	7.69484	7.67421	7.90999	8.8659	6.96346	7.71107	8.57618	8.18316	7.75825	7.32612
SPPL2B	8.65589	8.62648	7.67323	8.31142	7.46046	8.51352	7.62689	7.90714	7.94689	7.98927	7.75534	6.71545	8.06519	9.23206	7.07682	7.87581	8.80955	8.44824	7.62356	8.03825	9.03462	7.78484	8.00803	8.21684	8.6979	7.94417	7.85591	8.45211	8.02453	8.45793	8.93422	8.96706	8.81999	7.91701	7.37364	7.10617	7.95476	6.87069	8.38032	7.89266	7.99461	8.52589	7.9774	9.17937	7.54938	8.31476	8.10751	8.42309	7.92762
RP11-51J9.5	8.05802	8.20297	8.46435	7.69756	8.71053	8.40462	9.83424	8.68036	9.04664	8.99673	9.00701	8.3434	8.55749	8.8619	7.12702	8.35576	8.33527	8.17768	8.34968	7.68345	8.34975	7.93119	8.27991	8.76676	7.9895	9.12099	8.15824	8.33324	7.94624	8.03878	7.79163	8.37227	7.57437	8.48113	8.61029	8.08519	8.89519	7.59341	8.63234	8.64892	8.30348	8.92894	9.45379	8.34075	9.47947	8.22399	8.20239	8.624	8.77489
RP11-325K4.2	8.45286	8.03923	7.87531	7.81311	7.80864	8.85861	8.02677	7.68651	7.95204	7.86436	7.39292	6.75097	9.11409	8.45502	7.28596	9.46811	8.98608	8.48896	7.95666	8.03811	8.42921	7.55565	8.29894	8.25894	8.40884	8.28817	8.01565	7.81492	7.3582	8.0047	8.44654	8.05914	7.64361	8.2689	7.67141	7.24994	8.48944	7.16745	7.66364	8.03546	8.91019	9.13166	8.39583	6.95482	7.43824	8.31048	7.65802	8.66732	7.51899
AC144831.1	8.43556	7.52203	7.67293	7.85409	7.30719	8.66831	7.73798	8.61656	7.85967	7.84203	7.8287	6.82585	11.264	7.41335	7.56439	7.13428	8.33894	8.291	8.2641	7.9211	9.35477	7.92653	7.56245	7.63237	8.78208	9.66132	7.65723	7.48581	8.49898	8.49957	7.60902	7.39517	7.60081	7.87585	7.50933	7.67281	8.54746	7.33273	7.63848	8.43164	7.83135	9.01702	8.84885	7.33149	7.19958	7.8421	7.19418	7.90239	7.80664
LINC01001	8.44084	7.47651	7.86681	7.9872	8.16293	8.31127	7.94304	7.35411	7.7676	7.5503	7.53617	7.63139	7.95227	8.72369	7.17762	8.04182	8.41167	8.8753	7.63149	7.68859	8.71567	7.86902	7.83585	9.33935	8.9895	7.87263	7.42047	9.30701	7.96434	8.33673	8.98074	9.00382	8.0363	8.33044	7.88041	7.37559	7.7779	6.99823	8.72225	7.7979	7.74153	8.43754	7.96419	7.9041	7.75842	7.70477	8.08673	7.6295	7.82352
CTD-2576F9.2	9.72357	9.5065	9.49572	9.34624	10.251	10.4783	10.3924	9.26755	10.9342	9.60287	10.4509	10.3276	10.6142	9.65024	8.93025	10.5666	9.80625	9.02007	9.46046	10.1977	9.73667	9.79597	10.3781	9.68934	9.88975	10.5347	9.9923	9.79984	8.99284	9.68266	9.67778	9.78847	9.9193	9.87071	9.93358	9.48206	10.1635	9.8885	9.72566	10.1801	9.93709	10.2583	9.72523	9.50848	10.3684	9.78297	10.1891	10.8666	9.49108
AC144652.1	8.13055	7.90952	9.42318	8.66164	8.04648	8.18343	7.58557	7.33598	8.41551	7.95599	7.85236	7.59743	8.76323	8.47561	7.17155	7.60469	8.21487	7.89745	8.04586	8.10198	8.35769	9.11042	8.3464	8.29262	8.48988	8.49808	8.92352	7.98866	7.69827	8.76298	9.03348	8.35939	7.54939	8.01747	7.52429	7.38521	8.27684	8.29239	7.81373	9.12356	8.15432	9.04614	8.45801	8.43837	8.88061	8.45761	8.1187	8.20252	9.53056
RP11-542G1.1	7.9928	6.97228	7.48473	7.77219	7.36736	8.00705	7.44153	6.71592	7.03209	7.81943	6.84898	6.65856	7.66289	7.51623	6.5662	7.17377	7.47433	8.51892	6.98373	7.68516	8.025	9.15093	7.49318	7.69022	7.62964	8.34288	7.55869	7.3618	6.53071	7.67419	8.92282	7.56168	6.85797	7.59793	7.13318	7.18149	7.9155	7.61671	7.06144	7.67668	8.09577	7.72736	8.40615	7.57701	7.61215	8.27301	7.54823	7.97995	7.1692
RP5-1139B12.3	7.40347	7.76726	8.71243	7.31344	6.9867	8.03503	7.37875	7.28553	7.62235	7.98263	7.0901	6.50784	7.86875	7.67335	6.64178	8.40127	8.01009	7.4101	7.85149	8.03892	8.51929	8.1106	7.49318	8.28314	7.99517	7.58133	7.59095	7.35995	7.27499	8.10833	7.69009	8.9541	7.75775	7.51202	7.01939	6.64912	7.95882	7.61608	7.65596	8.17197	8.38203	7.87483	8.623	8.17384	7.41528	7.91289	8.27988	7.8291	7.42003
TTLL11-IT1	8.34929	6.72853	7.57521	8.6141	6.77815	8.44027	8.52386	8.07084	7.507	7.12255	7.06761	6.50784	7.87345	7.91702	6.73474	7.03912	8.09335	6.93935	8.24552	7.5144	7.24932	7.47966	9.7618	7.37909	7.50826	7.6204	7.31042	7.23921	6.53071	7.47076	7.30157	7.35955	6.85797	7.86691	7.78663	7.2883	8.20847	7.0589	7.00372	7.45789	7.18978	7.3043	8.30112	6.80287	7.05483	7.60125	7.06169	7.38642	7.61327
RP11-455F5.3	7.89541	7.75882	8.80955	7.52516	7.4223	8.1889	7.8713	7.29492	7.93958	8.13707	7.59878	6.65208	8.15977	7.25399	6.81568	7.57793	8.02601	7.52157	7.57507	7.66248	8.25804	8.72773	7.66145	8.1829	8.14283	8.40162	7.44098	7.64591	7.34863	7.94128	7.89178	8.49077	8.33282	7.79643	7.16933	7.22495	7.96624	7.5643	8.18733	7.98825	8.21772	9.00224	8.14784	8.2558	7.78099	8.53998	7.58557	8.21292	8.44797
CTB-175E5.7	10.0407	7.55277	9.10953	9.05308	8.25981	9.20382	7.82319	9.54071	9.26845	8.66918	8.60704	6.7123	9.47037	9.14863	8.84597	8.26121	10.0813	9.18958	9.145	9.24432	9.86197	9.38188	9.25902	8.99294	9.8174	10.2266	9.36654	9.13949	9.50037	9.43155	9.1726	9.73471	9.42594	9.41365	8.59666	9.22409	9.00202	9.11724	9.77286	9.12015	9.24683	9.24281	9.56219	9.26272	8.9502	9.14947	9.71959	8.93814	9.33366
LINC00887	8.17159	6.67116	7.51615	7.77857	6.79857	8.02998	8.91289	7.02548	7.22155	7.34372	6.98967	6.5345	7.86857	7.68663	6.63798	7.27122	7.84427	6.88079	7.19559	7.26417	7.31499	7.52522	8.06503	7.45159	7.59166	7.61347	7.22854	7.14479	6.58466	7.84884	7.55677	7.8561	6.8755	7.99611	6.98166	6.60268	7.79505	7.06567	7.10225	7.62181	7.26732	8.02377	7.92574	6.77287	7.03449	7.32333	7.07422	7.6053	7.72245
LINC00621	8.01144	8.07942	7.8848	7.84797	6.9968	8.66171	7.429	7.91503	7.76218	8.12234	7.42479	6.8877	8.33577	8.53453	7.21479	9.42477	8.82741	7.72438	7.5415	8.25034	7.86573	7.99143	8.09889	7.78124	8.0501	8.38966	8.19814	7.50661	6.84669	8.26152	8.18807	7.93704	7.28569	8.08334	7.28849	7.55464	8.26632	8.08969	8.98395	8.4374	8.14905	8.67938	8.45158	8.28992	7.57179	7.81058	7.59581	7.89711	7.78169
SYNPR-AS1	7.40347	8.50786	8.00313	7.33942	6.7326	7.63781	7.37875	7.32617	7.02355	7.64979	7.57079	6.50784	7.80212	7.03767	6.5662	7.85649	7.59691	7.14764	6.94534	7.24654	7.60366	7.53099	7.51327	7.7073	7.89487	8.33658	7.16198	8.47969	6.55708	7.56044	8.58308	7.49673	6.85797	7.47031	7.16886	6.57943	7.73267	6.98593	7.54114	7.74925	8.43055	7.59218	7.68352	7.09961	7.15617	7.32333	7.91362	7.61919	7.35595
LINC02086	8.57873	6.74065	7.46613	8.91519	6.77704	7.96445	7.52368	6.72867	7.40082	8.27424	6.90813	7.02006	7.66289	7.87616	6.5662	9.8212	8.18003	6.75264	7.15904	7.27608	7.31448	7.44903	7.56306	7.78345	7.54058	7.63316	8.10086	7.36495	6.53071	8.49199	8.10153	7.86648	6.95368	8.53986	7.41761	7.8147	8.86927	6.85422	7.12445	7.58637	7.65235	7.93447	7.62438	7.14483	8.8483	7.34226	7.21016	8.45484	7.19696
RP11-96D1.6	8.82883	6.88262	7.89982	7.48132	8.09973	8.28855	7.48747	7.30437	7.63094	7.53393	7.47966	6.60905	8.37678	7.31454	7.18864	7.20117	8.21385	8.21442	7.55717	7.65784	8.03917	9.01539	7.49318	8.31681	8.19008	8.48897	7.88984	7.42294	8.52258	7.8409	8.3998	7.36565	7.37931	7.66811	7.11408	8.07471	7.86433	7.95728	7.38022	8.31644	7.70251	8.26616	8.10668	7.06264	7.41325	7.79992	7.42542	7.87644	8.14358
PXN-AS1	9.09245	9.51303	8.9532	8.55651	8.77309	8.51429	9.44125	8.53138	9.02861	9.03621	9.12681	9.19414	9.12846	8.81721	8.33453	9.33119	8.56192	8.66237	8.42471	9.35214	9.31772	9.68576	9.07628	9.8576	9.60848	9.49809	8.52328	9.58143	8.12655	8.35409	8.86862	8.83604	8.40359	8.89214	8.70391	8.39235	8.55192	8.27107	8.8393	9.46862	9.21535	9.02309	9.02586	7.89176	10.1875	8.72671	7.86536	9.05234	9.96842
RP11-76C10.5	7.40347	6.65749	7.41893	9.55825	6.72382	8.74108	7.46403	6.64609	6.9972	7.12255	6.84898	6.50784	7.75545	8.67829	6.5662	8.53396	7.47433	7.71828	6.94534	7.45416	8.62027	7.35122	7.49318	7.34871	7.66449	7.58133	9.54256	7.14608	6.53071	7.42702	7.34283	7.27299	6.85797	7.31495	6.83663	7.03287	7.6844	6.99587	8.54869	7.32499	7.2714	9.94336	7.62438	8.95896	6.99868	7.32333	7.90826	7.38642	7.82936
RP11-964E11.2	7.42937	7.17377	8.33832	7.54812	6.91907	7.71838	7.46806	8.61926	7.81819	7.20828	9.18032	6.62421	7.68642	7.84455	8.08651	7.19726	8.69762	8.69633	6.99341	7.74446	8.14968	7.63496	7.50216	7.79207	8.14556	8.43322	7.27445	7.13203	8.77639	7.33388	7.41071	8.10009	6.90282	8.21778	7.01265	6.83543	7.94593	7.49878	7.2249	8.51573	7.76405	7.72157	7.83722	7.38209	7.61096	7.5226	7.14237	7.40185	8.69607
AC007365.3	7.78527	7.33113	8.13315	7.39402	7.12184	7.75851	7.516	6.95549	7.1717	7.24608	7.13896	6.62203	7.76871	7.28121	6.93199	7.33502	7.86386	6.84473	7.06319	7.33758	7.83131	8.13032	7.77462	8.60366	8.65569	8.0161	7.98175	7.80845	7.07802	7.86872	8.04652	7.9381	7.50584	7.58906	7.41342	7.2666	7.91906	7.24722	7.61022	7.60187	7.72179	7.92652	8.0211	7.35209	7.08839	7.67022	7.41579	7.5683	7.80793
CTC-338M12.4	8.45669	7.71474	8.4576	8.78068	7.98329	8.33323	7.72348	7.41359	8.11811	7.69293	7.76141	7.06314	8.3682	8.78071	7.6494	8.98737	8.75563	7.77496	7.73395	7.92678	8.29887	8.28588	8.91087	8.74415	8.84309	8.10923	8.59663	8.44805	7.50405	8.64024	8.20267	8.49729	8.27315	8.29685	8.02937	7.23032	8.30909	7.53956	7.79364	8.15699	8.63427	8.48702	8.56892	7.88529	8.4087	8.67632	8.49463	8.57272	7.57554
MIR34AHG	8.3204	8.34127	8.9237	8.56533	7.03476	8.35119	8.06353	7.99571	7.75694	8.20735	8.33513	6.69217	8.29961	8.07726	6.82823	8.84751	8.55212	8.61102	7.4494	7.74619	8.76362	8.30007	8.5096	9.12305	9.16124	9.06278	7.96679	9.30394	8.32238	8.19603	8.74123	8.42624	8.40959	8.47103	7.99787	6.91901	8.58178	7.51169	8.50937	8.05795	8.52999	8.77697	8.66462	8.03947	8.61081	8.80329	8.43031	9.18598	9.10747
RP3-402G11.26	7.88497	7.69537	9.21378	7.92708	7.21547	8.40845	8.29248	8.26417	8.13578	7.48156	7.68726	6.65765	8.09814	7.93665	7.08523	7.64169	8.37629	8.11649	7.46815	8.04478	8.67134	7.87892	8.04753	8.33782	8.77859	8.40865	7.60714	7.86843	8.42457	7.73924	8.10531	9.02078	7.76181	8.05152	7.87978	6.93399	8.09099	7.5601	8.43923	8.6042	8.00873	8.19018	9.50706	7.67518	8.33832	8.10046	8.23452	8.39506	8.13691
RP11-264B14.2	14.6128	13.6474	14.044	13.7888	14.5422	14.8801	15.6948	13.883	14.6605	15.0037	14.7749	15.6108	14.7348	13.7404	13.7425	13.9799	14.0255	13.1921	13.8267	14.5653	13.7413	13.7148	14.8537	14.2737	13.8878	14.1647	13.9634	14.8857	13.6446	14.3278	14.2462	14.3806	13.9615	14.1406	14.7836	14.6118	14.179	14.236	13.633	14.3098	14.2174	14.1049	13.6127	12.5039	15.1159	13.6392	14.0563	14.4627	14.6277
CTD-2008P7.9	7.95054	8.35783	7.61509	7.62218	7.14175	8.24523	7.42279	6.98734	7.05068	7.25839	6.91725	6.50784	8.24371	7.44366	6.91618	7.30552	7.81294	6.83137	7.31938	7.34612	8.34662	8.106	7.51919	7.96678	7.75204	8.05724	7.13394	7.40783	6.69672	7.45233	7.93762	7.29652	7.12133	7.3463	7.194	6.8633	7.85682	6.87435	8.18132	7.79252	7.57482	8.29023	7.94826	6.80504	7.05288	7.82555	7.13041	7.4014	7.46409
RP11-378A13.1	7.9717	7.56164	8.24203	8.35658	7.77544	8.85563	7.78542	7.96801	8.37455	8.62608	7.29442	7.963	9.57737	7.42991	7.28133	8.2427	8.47098	7.65673	7.75925	8.57924	7.97238	8.66376	8.32992	8.20101	8.32861	7.95587	8.03902	7.64721	7.77318	8.3968	8.33149	7.78019	7.86186	8.51959	7.48199	7.45831	8.67111	7.80937	7.61148	8.15586	7.83163	8.4724	8.68411	7.7125	8.17564	8.09309	7.943	8.11332	8.06045
RP11-539I5.1	8.45934	8.27527	8.21127	7.71561	8.06213	7.75688	7.37875	7.51469	8.10064	7.58384	7.53008	7.21885	8.68365	8.27869	6.81849	8.66553	8.336	7.32714	7.24572	8.84062	8.35776	8.60759	7.63212	9.39153	8.09494	8.07616	7.66681	9.33375	7.81779	8.0789	8.30059	8.48321	8.50822	7.65782	7.40485	7.22605	7.97586	8.50986	7.86138	8.44864	7.93725	9.01366	8.7082	8.13896	8.08534	8.24642	8.38973	7.78355	8.11812
LOC105376736	8.2808	7.03242	8.35959	7.40928	8.04286	8.28622	7.64515	7.88686	7.72442	7.75448	7.51897	7.1882	8.31699	8.02321	7.64584	7.84322	8.21912	7.44201	7.82619	7.7703	7.55393	8.86037	8.52248	8.31001	8.33843	8.2206	8.36977	8.0826	8.05957	7.95703	7.69015	7.52587	7.85472	7.68864	7.61611	8.5515	8.27285	7.56741	7.17701	7.89594	7.69554	7.53496	8.67124	8.32537	7.98098	8.59036	7.46386	8.30422	7.60672
RP4-635E18.6	8.2808	7.03242	8.35959	7.40928	8.04286	8.28622	7.64515	7.88686	7.72442	7.75448	7.51897	7.1882	8.31699	8.02321	7.64584	7.84322	8.21912	7.44201	7.82619	7.7703	7.55393	8.86037	8.52248	8.31001	8.33843	8.2206	8.36977	8.0826	8.05957	7.95703	7.69015	7.52587	7.85472	7.68864	7.61611	8.5515	8.27285	7.56741	7.17701	7.89594	7.69554	7.53496	8.67124	8.32537	7.98098	8.59036	7.46386	8.30422	7.60672
RBPMS-AS1	7.56146	7.1905	9.02178	7.38063	7.93838	7.93682	7.37875	7.84979	7.54003	7.87088	7.242	7.1357	8.53515	7.64522	6.98664	7.11309	8.35947	8.53765	7.10134	7.56696	8.65885	7.48833	7.53036	8.61625	8.18376	8.81504	7.54015	8.24374	8.48742	7.63968	7.71479	7.84409	6.89089	7.79761	7.31432	6.71367	7.84513	7.48408	9.19235	8.21503	7.53822	7.7376	8.25135	8.12482	7.45915	7.82743	7.92847	7.74773	7.39961
RP11-382A20.2	8.15097	7.27423	7.96483	8.03702	7.96363	8.31865	8.61737	7.34188	8.06884	8.28398	7.24349	7.0783	8.10927	8.86596	7.56343	8.24702	8.15027	7.30566	7.57935	7.64339	8.90667	9.1547	8.50921	8.81621	7.95119	8.21431	8.86306	8.65373	7.45009	8.6135	9.3887	8.16915	7.47717	8.46518	7.58755	6.93821	9.45969	7.84421	8.50761	8.53727	8.23393	8.49324	9.04148	7.58044	8.4477	8.15467	8.56154	8.86924	7.76427
LOC100996246	8.179	7.23032	8.53622	8.82079	7.7623	8.50106	8.4715	7.16518	8.4792	7.40957	7.38236	6.69671	8.21618	7.81146	7.35159	7.40861	8.0772	7.31888	7.41681	8.03699	8.84523	8.29501	8.35529	8.20309	7.90698	7.90809	7.38081	8.13398	7.22236	7.94898	7.53962	7.46285	7.30865	7.88096	7.64281	7.16717	7.97301	7.33228	7.62861	8.10434	8.47114	8.26897	7.94054	7.98771	7.79857	7.86014	7.61643	8.19442	7.60279
RP13-977J11.2	8.179	7.23032	8.53622	8.82079	7.7623	8.50106	8.4715	7.16518	8.4792	7.40957	7.38236	6.69671	8.21618	7.81146	7.35159	7.40861	8.0772	7.31888	7.41681	8.03699	8.84523	8.29501	8.35529	8.20309	7.90698	7.90809	7.38081	8.13398	7.22236	7.94898	7.53962	7.46285	7.30865	7.88096	7.64281	7.16717	7.97301	7.33228	7.62861	8.10434	8.47114	8.26897	7.94054	7.98771	7.79857	7.86014	7.61643	8.19442	7.60279
RP11-356C4.5	7.73803	7.27061	7.8851	7.41066	7.53168	8.12358	7.50298	7.44904	7.45784	7.48441	7.30934	6.64686	7.77843	8.58203	6.98365	7.48845	8.50367	8.81019	7.75406	7.46735	8.77048	7.67726	7.95697	8.94409	8.80632	7.93352	7.55186	8.15363	7.58686	8.08022	8.72422	9.40212	7.60676	7.73126	7.65314	6.81768	7.81168	7.13747	8.16498	8.00504	7.79416	8.09897	7.92623	7.8032	7.4596	7.68701	7.98719	7.42836	7.37745
PDCD4-AS1	8.14257	8.06418	9.39635	8.68739	8.1543	9.22209	9.05973	8.29114	9.33735	7.98137	8.19593	7.57239	8.87533	8.50112	7.49896	8.50156	9.11225	8.86101	8.0433	8.55024	8.61513	8.62904	8.67218	9.29252	9.36045	9.14846	9.12114	9.00332	8.23964	8.77664	8.67308	9.30982	8.24166	8.79997	8.69719	8.49346	9.14882	9.27106	8.34475	8.96705	9.40289	9.2797	8.70954	8.55656	8.81135	9.21691	8.4065	8.59707	9.3219
CTD-2358C21.4	9.06054	8.60892	8.42948	9.26569	8.96716	9.27659	8.7282	8.7048	9.37467	8.26843	8.2287	8.20508	8.65281	9.11081	7.51359	8.69073	9.4846	8.58885	8.19596	8.79154	9.33099	8.60119	8.02283	8.50324	9.36645	8.19425	8.49123	8.70175	8.78259	8.51984	8.80829	8.76245	9.77945	8.59025	8.96823	7.95444	8.02612	7.68258	9.19752	8.59772	8.65486	8.76292	8.3595	9.19209	7.80682	8.55847	8.83791	8.80836	8.29929
CFAP58-AS1	7.56576	7.40133	8.48432	9.11606	7.04922	7.95307	8.41522	8.07983	7.93841	7.8779	8.31161	6.9511	8.47313	7.79598	7.40512	8.82742	8.13512	7.68106	7.68771	7.80897	7.57057	9.60904	7.71267	7.62522	7.94635	7.94939	7.88564	7.47575	7.11678	8.0231	7.46063	7.45626	7.33198	7.84692	8.87668	9.09015	9.0687	8.04006	7.27057	8.5001	7.70616	8.93764	8.65519	7.54088	7.7391	8.18539	7.101	7.9188	8.01448
AC112721.2	7.81475	6.94024	7.49125	8.86411	6.72382	7.63781	7.51363	6.79337	7.25687	8.54142	6.86987	6.50784	7.85091	7.60944	6.87766	7.55409	7.80045	6.89631	8.2809	8.21817	7.90418	8.05606	8.43995	7.77208	7.60536	7.64949	8.98393	7.50064	6.53071	9.14033	7.82176	7.78074	7.33617	7.4646	6.90761	6.56669	9.46544	6.8437	7.70365	7.41436	7.29791	7.72114	7.83351	7.08726	7.10323	7.37736	7.33696	7.97463	7.26204
PSORS1C3	8.42043	7.3291	7.44531	7.44363	6.77953	7.70817	8.20448	6.91964	7.06206	7.52159	7.19086	7.01193	7.66289	7.41771	6.8427	8.32075	7.60969	8.40029	7.02378	7.53063	8.4876	7.84291	7.68074	8.26934	8.0172	7.58133	8.56241	9.24275	6.69614	7.49252	7.38633	7.84616	9.04997	8.8301	6.83663	7.76515	7.92329	7.34644	7.06219	7.40505	7.26663	7.25815	7.6525	7.96648	7.3521	8.38328	7.03728	7.51697	7.9765
LOC100287042	8.18842	7.05322	8.48665	7.63283	7.61516	8.15556	7.37875	7.33346	8.58325	7.56592	7.42336	6.63727	7.88861	7.81287	6.71084	7.10894	8.187	7.75257	7.61227	7.60346	8.06666	8.26923	8.22575	8.41694	8.14512	7.75839	7.90392	8.45236	7.09538	7.87288	7.89177	8.19314	7.57094	7.48592	6.94816	7.06094	8.07362	7.43456	8.13167	8.17239	8.38303	8.06542	8.16678	8.03132	8.27002	8.11205	8.3233	8.07452	7.79118
RP11-649A18.12	8.18842	7.05322	8.48665	7.63283	7.61516	8.15556	7.37875	7.33346	8.58325	7.56592	7.42336	6.63727	7.88861	7.81287	6.71084	7.10894	8.187	7.75257	7.61227	7.60346	8.06666	8.26923	8.22575	8.41694	8.14512	7.75839	7.90392	8.45236	7.09538	7.87288	7.89177	8.19314	7.57094	7.48592	6.94816	7.06094	8.07362	7.43456	8.13167	8.17239	8.38303	8.06542	8.16678	8.03132	8.27002	8.11205	8.3233	8.07452	7.79118
CTD-2620I22.1	7.42369	7.15549	8.98349	8.13973	7.30194	7.83012	7.37875	7.5602	7.76856	7.3655	7.88958	6.50784	8.30531	7.60149	7.00424	7.13873	8.68993	7.16662	7.42205	7.72428	8.55357	7.7076	9.18556	7.83388	7.91348	8.19515	9.44526	7.59887	6.57862	7.97113	8.94891	7.25149	8.4503	7.67353	7.55898	7.02877	8.38792	8.19765	7.51297	7.58268	8.32447	7.77545	8.84557	8.31195	7.0522	9.0547	10.0729	7.54327	7.37944
RP11-346D19.1	7.89704	6.84597	8.33005	7.88969	7.20427	8.65487	7.4283	7.51435	7.76749	7.29823	7.02018	6.73696	7.9282	7.31191	7.80997	7.64749	7.96965	7.23227	7.27115	7.42764	7.70921	8.72338	7.82709	7.69796	7.77731	7.90435	7.43622	8.34071	7.48247	7.89065	8.13042	8.55002	7.52004	8.23876	7.44712	6.74797	7.87736	7.32703	8.3854	7.89232	8.2077	7.69082	8.19225	8.07447	7.39461	8.37782	7.74173	7.51613	7.47752
CTD-2020K17.4	8.20139	8.11672	7.86594	7.56244	8.43361	8.02059	7.99829	7.57383	7.93178	7.97374	7.06761	8.414	7.96427	7.27462	7.01672	8.1306	7.98812	7.40465	7.28376	7.86973	8.52677	8.75064	8.33773	8.47666	8.72239	8.56692	7.69236	8.8618	8.05495	7.78326	8.2556	7.95094	9.10229	7.4639	8.06335	6.91133	8.42765	7.42541	7.69024	8.55636	8.47031	8.33539	8.01904	8.08985	8.0633	8.47445	9.04244	8.69227	7.92162
RP11-505P4.6	8.02993	8.04311	7.41893	7.48993	7.21628	7.91778	7.37875	7.3548	8.22346	7.9417	7.52782	8.3269	8.74303	7.12566	6.97452	7.27908	7.74251	7.14027	7.68247	7.99136	7.35627	7.56413	9.17219	7.34871	8.06888	7.72397	8.02357	7.50312	6.98529	8.20797	7.82622	8.03106	7.21645	8.68496	7.76216	6.88569	8.22349	7.75136	7.50653	7.68211	8.37479	8.07379	7.87014	7.05566	7.27314	7.80376	7.57884	8.16266	7.1692
RP11-626H12.1	7.50004	9.2676	7.79302	7.45419	6.72382	7.7264	7.37875	6.72174	6.9972	7.55587	7.03422	6.50784	8.12924	7.51795	6.61962	7.92021	7.54901	6.74506	7.14242	7.40769	7.85996	7.527	7.90372	7.42162	7.93665	7.58133	7.62421	7.18047	6.59787	7.93658	8.82293	7.35128	6.9668	7.31495	6.83663	6.62341	7.8931	6.8437	10.0528	7.50708	8.98737	7.23459	7.86128	8.18571	8.58137	7.61132	8.47492	10.24	7.1692
LINC02188	8.3431	6.74369	8.11379	7.45846	7.381	7.65766	7.39862	7.34312	7.35244	7.12255	7.16656	6.50784	8.24823	7.20369	6.5662	8.84214	9.27624	7.22203	7.35198	7.43436	8.96744	8.28417	7.49318	8.48367	7.55196	7.6433	7.6464	7.13203	6.8709	7.48624	7.41995	7.31682	6.85797	7.37836	7.12143	6.91582	8.02261	6.98808	7.85423	8.70504	7.39782	7.70535	9.01841	6.8566	8.60038	8.35688	7.88544	8.46642	7.41655
RUNDC3A-AS1	8.76514	6.94806	7.66573	8.32169	6.8204	7.8018	7.39033	7.17606	7.16411	7.14303	6.87836	6.55169	7.77107	7.5661	6.90833	7.50464	7.76746	6.81021	7.06069	7.31586	7.6037	9.38695	7.82214	7.50804	7.59244	7.77933	7.45199	7.83605	6.66251	7.47321	7.93691	7.49597	6.96455	7.70439	6.85654	6.58559	8.22093	7.0841	7.02752	7.73931	7.97793	7.96683	8.2199	7.02565	7.11089	7.34968	7.40453	7.41667	7.22681
LINC00987	8.92543	9.94966	9.56434	9.2476	9.01411	9.75122	8.23415	8.62363	9.98	10.2251	8.42204	8.71082	9.55168	9.11663	8.08036	9.90577	9.61172	9.05741	8.94216	9.40216	9.63405	9.41064	9.96265	9.7619	9.46736	9.30934	9.44824	10.6449	8.55928	9.66396	9.61097	8.76669	8.80021	9.65299	9.30285	9.18051	9.74101	8.7112	9.27587	9.54585	9.14272	9.45512	9.44188	8.89834	9.78358	9.76105	9.65152	9.7577	9.12645
CTC-559E9.8	8.1705	8.45655	8.66279	7.34855	6.89808	7.99871	7.37875	7.43154	8.07862	8.02973	7.73835	6.69306	7.98359	7.24296	7.38473	7.12565	8.41977	7.76805	7.62929	8.02522	8.70712	7.69855	8.14175	7.93362	8.55951	8.66888	7.6971	7.80007	7.39209	7.84511	8.41617	7.34103	7.63422	7.52515	7.54835	6.60223	7.87616	7.1452	7.00372	8.56973	9.01869	8.38154	8.8166	8.00373	7.71865	8.49173	7.97354	7.71887	7.30899
RP11-845M18.6	7.748	9.38501	8.64795	8.09802	6.75233	7.67058	7.44233	7.3662	7.66765	7.25592	7.07932	6.50784	7.7464	7.50963	6.5662	7.85188	7.94009	7.43187	7.26309	7.26047	7.79168	7.88373	7.49318	7.91689	7.70049	8.63196	7.2655	8.32082	6.67432	7.49512	7.7282	8.38858	7.22721	7.51533	7.0571	6.63667	8.08485	8.05515	8.8727	9.13222	8.61232	8.25516	8.06108	8.28114	7.33178	7.64837	7.49985	7.94166	7.33818
XXbac-B135H6.18	8.15174	8.04089	10.018	8.29968	7.88024	8.17215	7.46948	8.10646	8.31567	7.92482	8.32051	6.93426	8.10417	7.70106	7.08367	7.20321	8.29892	7.78479	7.71839	7.59474	7.9338	7.93161	8.16843	8.46868	8.81048	9.39008	7.73584	7.9537	7.65516	7.90742	8.32143	8.06521	7.65262	7.6928	7.47689	7.6958	8.42933	8.01133	7.73872	9.6568	8.26422	8.40201	9.29656	7.3277	8.57246	7.93863	7.73168	8.06234	8.54898
RP11-259O2.2	7.90718	8.42194	8.17667	7.54491	6.92658	7.70128	7.98425	6.77171	7.03061	7.78255	7.48556	6.75473	7.84704	7.13798	6.73753	7.36697	7.93854	6.97239	7.11781	7.3917	7.67457	7.73486	8.07135	7.74811	7.78822	7.66395	7.98524	7.40415	6.87107	7.62013	8.19589	8.26022	8.78721	7.31676	7.02735	7.22041	8.60181	7.0046	7.39878	7.39269	7.199	7.42392	8.0043	8.15505	7.11664	8.00464	7.09554	8.16376	7.44466
MIR142	7.58732	7.55244	7.50801	7.57823	7.38455	8.85121	8.32306	7.45464	9.64099	7.29142	6.96988	7.72132	8.00927	7.48731	6.86512	7.32021	8.1204	7.78934	7.22051	7.44128	8.27197	7.54833	7.57764	7.83376	8.51309	8.03889	7.65343	8.16332	6.67773	7.90263	7.62433	7.42863	7.65663	7.94334	8.83416	7.88751	8.0606	6.99001	7.29513	8.09615	8.34406	9.34088	7.97259	7.19278	7.2529	8.18999	7.86366	8.33966	7.59387
RP5-1171I10.5	7.58732	7.55244	7.50801	7.57823	7.38455	8.85121	8.32306	7.45464	9.64099	7.29142	6.96988	7.72132	8.00927	7.48731	6.86512	7.32021	8.1204	7.78934	7.22051	7.44128	8.27197	7.54833	7.57764	7.83376	8.51309	8.03889	7.65343	8.16332	6.67773	7.90263	7.62433	7.42863	7.65663	7.94334	8.83416	7.88751	8.0606	6.99001	7.29513	8.09615	8.34406	9.34088	7.97259	7.19278	7.2529	8.18999	7.86366	8.33966	7.59387
CTC-487M23.5	8.19507	7.71699	7.57531	8.01104	7.55114	8.13417	7.37875	7.17761	7.7537	8.65018	7.37926	7.30043	8.31853	7.94018	7.22706	7.98881	8.21016	7.3147	7.78699	8.67539	8.19345	8.03368	8.20575	7.9141	8.1442	8.08722	8.07255	8.1429	7.54523	8.38063	8.49017	7.80375	7.85327	8.17699	7.01175	7.29007	8.62834	7.4566	8.02194	8.01982	8.27073	8.49639	8.37859	7.81901	8.02433	8.23021	7.99473	7.86061	7.32582
LOC101929705	7.97281	7.96942	7.81198	7.8256	7.08004	7.82565	8.05223	7.32302	7.3498	7.2372	7.3654	11.5017	8.79138	9.27097	6.82648	8.41287	7.84718	7.62257	7.92041	8.36479	7.54868	8.08011	7.56912	7.72166	8.64131	7.94426	8.37358	7.47303	6.70508	7.99246	8.53608	8.01444	7.02037	7.75592	7.11951	6.93659	7.90085	7.00525	7.63589	7.8584	8.16905	8.32144	7.95432	8.02622	7.43526	7.36725	7.22396	8.16325	7.99714
RP5-1120P11.1	7.97281	7.96942	7.81198	7.8256	7.08004	7.82565	8.05223	7.32302	7.3498	7.2372	7.3654	11.5017	8.79138	9.27097	6.82648	8.41287	7.84718	7.62257	7.92041	8.36479	7.54868	8.08011	7.56912	7.72166	8.64131	7.94426	8.37358	7.47303	6.70508	7.99246	8.53608	8.01444	7.02037	7.75592	7.11951	6.93659	7.90085	7.00525	7.63589	7.8584	8.16905	8.32144	7.95432	8.02622	7.43526	7.36725	7.22396	8.16325	7.99714
ATP1B3-AS1	8.88063	9.90233	8.01161	7.90853	7.25105	8.04039	7.37875	8.03278	7.18699	8.18615	8.17961	6.50784	8.53091	9.40641	7.06549	9.22813	8.93958	8.72403	7.25821	8.18073	8.40526	7.93778	7.76484	8.4398	8.80755	7.93751	7.52013	7.84638	8.12635	8.74957	8.89132	9.98048	7.99508	8.01755	7.24296	6.84321	8.00127	7.01661	7.94935	8.49543	8.95802	7.9488	8.09344	8.53246	7.42904	8.43269	8.32189	8.29167	7.77495
RP11-894P9.1	8.20134	8.8257	7.91209	8.81315	7.13676	8.10444	8.11202	8.15122	7.62644	8.25035	8.06236	6.83222	8.98184	9.50256	8.02481	8.31528	9.60284	8.52869	7.9112	8.31696	8.73824	8.17511	8.10001	8.64732	8.84026	8.07384	8.88652	7.95005	8.00622	8.93052	8.40113	9.56086	8.13966	8.01769	7.87984	7.51684	8.63421	7.28217	8.6354	8.37515	8.28662	8.82519	9.00109	8.69558	7.43843	8.46991	7.81135	8.60239	8.44189
LINC00265	9.04196	8.89677	8.23544	8.66018	7.86681	8.78728	7.59862	7.89282	8.27641	8.1881	8.89427	6.74224	8.62899	8.62685	7.67024	8.10171	9.28247	9.43184	8.46888	8.80986	9.47061	9.30958	8.23608	8.67876	9.47504	8.97268	7.71667	8.65005	9.53256	8.64417	9.26601	9.29086	9.1786	8.70452	7.81372	7.82603	8.72534	8.611	8.39237	8.6234	8.88419	9.02766	8.38482	9.35799	8.26362	8.51428	8.80151	8.6489	7.88588
RP11-380L11.4	7.78626	7.06337	7.49301	7.68097	7.22422	8.3583	7.37875	6.97659	7.73175	8.01378	7.02913	6.77956	7.80349	7.79528	7.03465	8.21801	7.88742	6.94698	7.46336	7.56972	7.6894	7.66869	8.0862	7.90737	8.0387	7.6467	7.61774	7.62938	6.71593	8.38716	7.88667	7.58305	7.06171	7.83105	6.90178	7.01186	8.05121	7.04634	7.25717	7.7948	7.55769	7.49166	8.04368	6.89323	7.68615	7.5617	8.11935	7.97368	7.85562
RP4-798A10.4	7.65803	7.0066	7.97186	7.43076	7.34256	7.84876	8.25004	7.22903	7.85129	8.66846	7.33411	8.03043	7.80528	7.41351	6.70327	8.67249	7.79121	7.22246	7.67435	7.37572	8.12098	9.6899	7.75592	7.69638	7.55036	8.27574	8.03316	7.39865	7.41505	7.92935	7.41686	7.91235	7.45974	8.31308	7.31799	7.70338	7.94983	8.1154	7.4986	8.95078	7.45466	7.79802	8.02633	8.63496	8.20366	7.73427	8.73748	7.61509	8.19852
AC004893.11	8.71843	8.2702	7.87848	10.2977	7.71757	8.36948	7.97308	7.60404	8.55299	8.08529	7.88603	7.25617	8.37344	9.07636	7.79052	8.86961	8.92954	8.36227	7.36116	8.52412	8.56965	8.10307	9.0752	8.48995	8.61979	8.19182	8.23333	7.87887	7.65971	8.44408	8.60535	8.66724	8.49748	8.64713	7.74574	7.49671	8.49257	7.78854	8.3092	8.57543	8.56924	8.09566	8.33746	7.37108	8.64841	8.44406	8.06349	9.4742	7.92727
LOC101927550	8.71843	8.2702	7.87848	10.2977	7.71757	8.36948	7.97308	7.60404	8.55299	8.08529	7.88603	7.25617	8.37344	9.07636	7.79052	8.86961	8.92954	8.36227	7.36116	8.52412	8.56965	8.10307	9.0752	8.48995	8.61979	8.19182	8.23333	7.87887	7.65971	8.44408	8.60535	8.66724	8.49748	8.64713	7.74574	7.49671	8.49257	7.78854	8.3092	8.57543	8.56924	8.09566	8.33746	7.37108	8.64841	8.44406	8.06349	9.4742	7.92727
RP11-38L15.8	12.5396	12.6842	12.8281	12.0938	12.1435	12.8714	11.9302	11.7981	12.0567	13.1317	12.5343	12.3945	12.6941	12.52	12.7788	12.2362	12.4172	12.312	11.7379	12.9599	13.781	13.0812	13.0386	12.9199	12.3322	13.1428	12.6552	12.8928	11.4084	13.2804	13.0395	12.4471	12.5138	13.0524	12.8226	12.7685	12.4378	12.3555	12.832	13.0817	12.3443	12.7039	12.3386	11.7139	13.3865	12.7313	12.8777	12.6493	13.2451
RP11-326G21.1	7.69775	7.47603	7.69322	8.08224	7.119	8.37228	8.35351	7.07207	7.60761	7.32633	7.30193	6.87886	7.98592	7.72049	7.43265	8.09162	7.47433	7.31932	7.06905	7.47245	7.53395	7.95981	8.77383	7.4774	7.80941	7.7521	7.83365	8.0158	6.73033	8.69074	7.8111	7.83377	7.22904	9.04659	7.47946	7.11559	8.05391	6.94178	7.66485	8.00168	7.85875	8.11865	8.18277	7.30401	7.63842	7.61841	7.90598	8.05092	7.35288
LINC01857	7.40347	7.14474	7.70864	7.2537	6.79071	7.81381	7.59272	6.71273	10.6497	7.6184	6.91678	6.90281	7.75908	7.28557	6.94258	8.15573	8.0939	7.4442	6.97761	7.47939	8.47274	7.68004	7.71469	7.77241	8.1642	7.74147	7.61135	8.00146	6.64665	8.37935	7.91512	7.76174	7.64239	7.69398	7.41892	6.82146	7.76558	6.8437	7.08556	7.71565	7.36343	7.68461	7.62438	6.78804	8.52878	7.39785	7.94464	8.44977	7.32875
SUCLA2-AS1	8.09344	7.35244	8.18968	8.80045	7.51247	8.84891	7.58184	7.68534	7.64943	7.43278	7.3338	7.2494	8.46965	7.68673	6.91311	7.74805	8.15573	7.20349	9.87167	7.70417	7.67989	8.71843	8.06847	7.82559	7.9651	8.33505	7.57044	7.70885	7.33175	8.30666	7.96199	8.22198	7.4114	8.75833	7.65738	8.59603	8.29307	7.39974	7.65655	8.17869	7.65191	8.0736	8.18418	7.65525	7.38783	8.00622	7.40536	8.22004	7.87576
RP11-667M19.2	8.2999	7.86833	8.29882	7.91629	7.47002	8.99183	9.17258	8.02692	7.74573	8.69325	8.35741	8.11622	8.08842	7.87524	7.56697	7.60564	8.22737	6.9753	7.24103	8.20328	7.28255	7.71474	8.94089	8.07087	8.15245	8.58874	7.75806	7.15008	7.84858	7.93619	8.37716	7.2997	8.22941	8.06439	7.92721	6.62402	8.46724	7.9209	7.75737	8.17571	8.34519	7.9842	8.00158	7.83553	8.85398	8.34028	7.85759	8.47464	7.1692
CTD-2583A14.8	9.49642	10.251	9.11638	9.92027	9.38106	9.5074	8.78684	8.93794	9.26571	9.07672	9.47482	9.39365	8.68421	9.46611	8.49859	9.01726	9.66407	9.4593	9.20156	9.68329	9.44729	9.41942	9.89383	9.36712	9.2131	10.362	9.74418	9.35387	9.32321	9.60982	8.85644	8.91649	10.4987	9.66851	9.4376	9.02537	8.96608	8.60571	8.97897	9.22853	9.10919	9.46255	10.0352	10.0348	8.91341	9.43599	9.41028	8.95794	9.73195
RP4-575N6.4	7.81255	6.76996	7.63456	7.31846	6.92504	7.97366	7.37875	6.80369	8.31465	7.42334	6.99336	6.55334	7.88735	7.36888	6.9806	7.1037	7.99399	7.13662	7.67295	8.07131	8.15376	7.55072	8.09004	8.07372	7.57398	7.9042	7.24253	7.50848	6.67661	7.77742	7.39947	7.44462	7.16698	7.36692	7.03767	6.77119	8.31539	7.00662	7.19718	7.69602	7.49137	7.8323	8.0418	6.94459	7.14371	7.61999	7.41342	7.61185	7.25391
CTB-113I20.2	8.37133	7.46068	8.73502	8.10047	7.86	8.77157	8.95996	7.9789	8.28978	8.64537	8.09641	7.06818	8.59604	8.08913	6.88403	7.57566	8.55995	7.61044	7.67575	7.81175	8.48716	8.38178	8.62621	8.3433	8.47215	8.32399	8.48486	7.84221	7.55723	8.19038	7.85755	7.81338	8.35225	8.47277	7.7295	6.89393	8.52482	7.23465	7.77484	8.20141	8.3364	8.50887	9.08859	7.61754	9.02329	8.51015	7.75733	8.90022	8.63817
RBAKDN	7.82745	6.827	7.41893	9.38166	9.19651	9.0232	7.45897	6.64609	7.20019	8.08117	7.43679	7.54678	8.03868	8.76408	6.72472	7.65887	7.47433	7.67168	7.40591	8.44005	7.51752	7.55236	7.49318	8.09044	7.7591	7.98687	7.63157	8.62332	6.63663	7.60831	8.19508	7.22317	7.75195	7.50117	8.02194	7.58974	7.74325	6.8437	7.04477	8.11775	8.93819	7.53138	7.83052	8.76473	6.99868	7.47958	7.05141	7.64034	7.1692
AC010894.3	8.45041	7.91708	7.81714	8.14138	7.04644	8.32085	8.34177	7.5336	7.46075	8.70815	7.75384	7.40553	8.11338	7.53921	7.83746	8.47431	8.0612	7.18624	7.4139	8.25037	7.59117	8.72069	7.80901	8.04617	8.25595	8.30543	7.51482	7.91481	6.96596	7.77178	8.14208	7.99896	7.17844	7.82885	7.47658	7.76336	8.77004	7.96155	7.96155	7.68	8.25415	7.7559	8.09004	7.3145	8.27114	7.62051	7.84369	8.88011	9.0626
LOC101927895	8.68537	8.39721	8.53707	8.1368	8.11797	8.3635	9.72795	7.52401	8.75248	8.31322	8.78153	7.96046	8.95722	8.02676	8.28432	9.45616	8.61139	8.81111	7.82527	8.28129	8.85514	9.58724	8.64158	9.02063	9.00743	7.87934	8.06435	8.43581	8.65806	8.54332	8.74104	8.38541	8.20725	8.14926	7.61607	8.18983	9.02457	7.81795	8.16969	8.47135	7.70562	8.97775	9.65703	9.61449	9.48494	8.46302	8.22652	9.24939	7.21724
RP1-43E13.2	8.68537	8.39721	8.53707	8.1368	8.11797	8.3635	9.72795	7.52401	8.75248	8.31322	8.78153	7.96046	8.95722	8.02676	8.28432	9.45616	8.61139	8.81111	7.82527	8.28129	8.85514	9.58724	8.64158	9.02063	9.00743	7.87934	8.06435	8.43581	8.65806	8.54332	8.74104	8.38541	8.20725	8.14926	7.61607	8.18983	9.02457	7.81795	8.16969	8.47135	7.70562	8.97775	9.65703	9.61449	9.48494	8.46302	8.22652	9.24939	7.21724
LOC101929331	7.51607	8.63661	8.12855	7.91318	7.01152	8.06344	7.68912	7.98839	7.76099	7.6982	6.94859	6.52241	8.04723	7.45965	6.5662	8.40123	8.6645	7.10478	7.20211	8.03555	8.58417	7.6616	7.70499	8.02549	8.87048	8.03711	7.94768	8.01888	6.88342	8.66139	7.71816	7.5079	8.20784	7.68294	8.04436	7.00619	8.27815	8.28592	7.84738	8.17733	7.55697	8.78419	8.23101	7.32201	7.68257	7.73163	7.69883	7.82869	7.74984
RP11-344B5.2	7.51607	8.63661	8.12855	7.91318	7.01152	8.06344	7.68912	7.98839	7.76099	7.6982	6.94859	6.52241	8.04723	7.45965	6.5662	8.40123	8.6645	7.10478	7.20211	8.03555	8.58417	7.6616	7.70499	8.02549	8.87048	8.03711	7.94768	8.01888	6.88342	8.66139	7.71816	7.5079	8.20784	7.68294	8.04436	7.00619	8.27815	8.28592	7.84738	8.17733	7.55697	8.78419	8.23101	7.32201	7.68257	7.73163	7.69883	7.82869	7.74984
U91328.19	7.55006	8.44961	10.1551	7.96217	8.48259	8.04095	7.83157	7.98908	7.97021	7.50852	8.18518	7.30478	8.13669	7.88214	7.08228	7.99974	8.31049	8.00431	7.9083	8.75032	8.52232	8.48393	7.92395	7.74915	8.95881	9.37009	8.02194	8.23497	7.06024	8.71611	8.58269	8.3051	8.35965	7.67824	7.29377	7.37223	7.79909	7.70489	7.3418	8.82231	8.89422	9.20154	8.42276	8.94975	7.77493	9.88709	8.0017	7.91026	7.30344
RP11-734K21.5	7.79599	6.73808	7.99885	7.43808	6.79739	7.91822	7.48507	7.39327	7.38921	7.6408	7.76491	6.54136	8.12908	7.51075	6.60867	7.19784	7.96969	7.14659	6.94534	7.36736	7.97223	7.88852	7.49318	7.4162	7.68861	8.0138	7.13355	7.13203	8.67761	7.81862	7.62512	7.63328	7.1292	7.72607	7.36813	9.00333	8.019	7.06466	7.20061	8.10598	7.34026	7.3731	7.86866	7.13431	7.13049	7.38704	7.03728	7.46472	9.2226
MIR4713HG	7.70836	8.23228	7.83701	7.89499	7.221	9.15588	8.23413	6.7865	7.47693	8.23182	8.28317	6.66857	8.41117	7.44376	7.41984	8.35412	8.1213	7.51586	8.72156	7.50517	8.0885	8.39491	8.4404	8.26095	7.75509	8.00803	7.8001	7.83014	7.80346	7.91881	8.32326	7.76621	7.62851	7.57862	7.42613	7.32175	8.01223	7.41235	7.91553	7.6614	7.67743	8.02895	8.18177	8.2855	7.72126	7.62497	7.51382	7.84832	7.86014
RP11-108K3.1	7.70836	8.23228	7.83701	7.89499	7.221	9.15588	8.23413	6.7865	7.47693	8.23182	8.28317	6.66857	8.41117	7.44376	7.41984	8.35412	8.1213	7.51586	8.72156	7.50517	8.0885	8.39491	8.4404	8.26095	7.75509	8.00803	7.8001	7.83014	7.80346	7.91881	8.32326	7.76621	7.62851	7.57862	7.42613	7.32175	8.01223	7.41235	7.91553	7.6614	7.67743	8.02895	8.18177	8.2855	7.72126	7.62497	7.51382	7.84832	7.86014
B4GALT1-AS1	7.99703	7.41876	8.20277	7.88866	8.40744	8.55588	9.06138	8.13378	7.59389	7.8267	8.08076	8.69113	9.0204	7.33948	7.47607	7.31601	8.28554	7.84477	7.95545	8.20261	8.54552	8.37299	7.65044	8.18326	8.57734	8.96187	7.71356	7.89729	8.1202	8.2277	8.81821	7.62014	7.52944	8.38294	7.56193	7.31885	8.30221	7.84048	9.56851	8.49891	7.86945	7.9071	8.48542	7.80675	7.6718	8.49352	7.5888	8.36108	9.29533
USP46-AS1	8.19586	8.37704	8.85773	8.64675	8.44798	8.77813	7.54151	9.5532	8.17714	8.18098	8.49445	7.04817	9.11754	8.8437	8.04062	8.3877	9.04852	8.18295	7.76608	8.64396	9.17834	9.34094	8.82896	9.69359	8.955	8.94722	8.35749	8.76765	9.05721	8.57227	8.98617	8.37226	7.67082	8.60131	8.04302	8.13926	9.3726	9.31736	8.92177	9.04825	8.76207	9.39515	9.49105	8.7164	8.50972	8.75001	8.78776	8.92715	8.57441
RP11-1112J20.2	8.46315	8.57434	9.53868	8.81764	8.4671	9.6885	8.77086	8.1319	8.96445	8.77656	8.27884	8.4993	8.50426	8.62687	8.65752	9.23602	8.4943	8.56944	8.14472	8.9992	8.83225	8.9739	9.46672	9.48485	9.36554	9.46687	8.44762	9.75314	8.08169	9.07347	8.89589	9.05456	8.42065	9.5703	8.15008	8.15011	9.37443	8.20047	8.94672	9.02686	8.88514	8.90991	8.76474	8.54983	9.02026	9.30604	9.16544	9.49422	8.83239
RP11-57A1.1	8.16491	8.45929	8.84584	8.3242	7.97897	8.86121	8.14307	7.64459	7.95425	9.18995	7.67205	6.93219	8.53914	8.26051	7.37278	9.14308	8.70784	8.30292	7.79975	8.66444	8.13169	8.62262	8.32908	8.62224	8.4365	8.49574	7.57273	8.82784	8.34688	8.30549	8.13507	9.1632	7.99382	8.55365	7.74318	8.02197	8.27391	8.51984	8.17466	8.57308	8.82192	8.18576	8.65374	8.10498	8.59817	8.3711	9.03459	8.53646	7.97672
CITF22-92A6.1	8.81113	8.06253	8.97166	8.8409	8.1534	8.65576	7.82547	7.47066	8.17938	8.18966	8.25759	7.83711	8.14967	8.2695	8.76876	8.80011	8.38716	7.83866	7.46096	7.66976	9.05403	8.88352	7.93223	8.77553	9.95384	8.16866	8.22483	8.21632	8.05721	8.64249	9.06096	8.73861	8.64154	8.37161	8.04558	6.94128	9.40969	8.0028	8.13415	9.37197	9.1397	8.82804	8.46941	8.2116	8.56992	9.42993	8.24261	8.5959	7.89296
[truncated: 1,508 more rows]
[truncated: 50 more columns]
