# Supplementary material for: Characterization of long non-coding RNA and messenger RNA profiles in laryngeal cancer by weighted gene co-expression network analysis
Source: Aging (Albany NY). 2019 Nov 18;11(22):10074–99. doi: 10.18632/aging.102419 (PMC6914418; doi:10.18632/aging.102419)
Supplement: Supplementary Table 2 [file aging-11-102419-s004..xlsx]

## Sheet: Sheet1
Supplementary Table 2. mRNA expression of laryngeal cancers from TCGA database for the WGCNA analysis.
Sample	TCGA-CR-7398	TCGA-CV-7177	TCGA-CN-A63T	TCGA-CV-7437	TCGA-CV-7415	TCGA-CN-6988	TCGA-CV-5444	TCGA-CR-7370	TCGA-CV-7247	TCGA-BA-6868	TCGA-F7-7848	TCGA-CV-7421	TCGA-CV-7433	TCGA-CN-6012	TCGA-CV-A45Z	TCGA-CR-7388	TCGA-CN-6992	TCGA-CR-7371	TCGA-DQ-7595	TCGA-CN-6021	TCGA-BA-A6DA	TCGA-D6-A6ES	TCGA-CV-5978	TCGA-CN-6022	TCGA-BA-4078	TCGA-CV-7245	TCGA-CN-5363	TCGA-CN-4722	TCGA-BA-A6DI	TCGA-CN-4739	TCGA-CV-A45W	TCGA-CN-4727	TCGA-BB-7864	TCGA-CV-A460	TCGA-CR-7374	TCGA-CN-A49B	TCGA-CN-4723	TCGA-BA-6869	TCGA-DQ-7589	TCGA-D6-6517	TCGA-CN-A641	TCGA-CV-5430	TCGA-BB-7870	TCGA-CN-6010	TCGA-D6-8568	TCGA-CV-5440	TCGA-CV-7422	TCGA-CV-7410	TCGA-BB-4217
MAGEA11	3.81606	3.28928	3.92657	6.4715	6.33234	4.43625	6.19527	6.26401	3.55175	6.30941	3.58274	4.68564	6.24293	5.4293	6.22603	6.15223	6.32694	5.02979	5.76028	3.50591	2.02528	5.25516	4.79564	6.16311	6.30005	6.17244	1.99235	6.04871	4.17783	3.26321	6.24255	2.00993	1.97841	4.93656	5.18116	3.03522	6.2206	2.9381	6.13305	2.8303	5.50417	1.929	4.01569	4.7283	1.91913	1.9512	1.95233	4.31603	1.90037
MAGEA4	3.9665	1.94309	1.91915	6.23726	6.5839	3.24255	1.91018	6.46919	6.03666	5.72205	3.30279	4.16509	5.2922	6.01511	5.50118	6.52208	6.36996	6.38528	6.02936	1.96301	2.02528	6.54417	4.65821	6.61205	4.93635	3.36863	4.53565	6.35363	1.91666	2.822	6.12081	4.04224	3.82961	5.72738	5.71282	4.60266	6.29559	2.9381	1.93243	6.32321	5.58957	3.05002	2.00463	4.47784	1.91913	6.46697	1.95233	6.22863	1.90037
TRIM54	5.85629	1.94309	5.79753	3.75463	4.95399	6.02624	6.13733	1.91687	6.15101	3.64387	5.55219	2.8677	4.39411	4.28074	5.38448	3.10641	1.91133	4.18284	4.94113	1.96301	4.13978	2.09185	4.36611	6.00744	1.89017	4.99576	5.78508	1.93755	2.87895	5.84591	5.39783	5.95527	5.96416	1.93815	2.86137	3.03522	3.29573	5.78616	1.93243	1.95988	5.90653	1.929	6.02538	4.67012	6.01691	6.32754	5.56801	3.30932	3.57564
WIF1	6.26795	5.28268	4.1916	5.02468	2.88928	1.9685	4.63587	6.24691	5.50739	5.14319	4.8314	5.46893	3.95492	4.18488	5.66559	6.01156	5.29811	6.17615	3.90057	6.3064	2.02528	4.63693	5.16623	4.13635	6.73532	2.91775	1.99235	3.77023	4.07861	2.822	6.4887	2.00993	3.82961	5.38977	5.12058	5.70882	4.81768	1.9462	6.50035	3.54301	3.39408	3.05002	6.50566	3.93078	3.96772	3.12125	6.20908	1.91031	1.90037
PTPN20B	5.47001	4.3657	1.91915	5.50249	5.62183	1.9685	5.47319	3.76174	5.37774	1.93246	2.8573	4.0653	5.78453	1.89913	3.74614	3.10641	5.69348	5.76609	4.58416	3.50591	2.02528	2.09185	5.66125	4.55237	2.62465	5.54269	4.02692	1.93755	2.87895	5.5027	3.14209	2.00993	3.82961	3.98401	4.24464	5.18365	2.84719	4.39294	5.62809	3.54301	3.87268	5.89253	2.00463	4.3077	4.89619	5.46782	1.95233	4.61084	4.47277
TRIM72	5.76124	1.94309	5.75285	3.01399	4.4635	6.07474	5.69874	1.91687	5.82034	1.93246	5.74916	1.92734	4.58704	1.89913	3.94133	3.10641	4.21245	4.37771	5.99401	3.04216	2.02528	2.09185	1.93492	5.88611	3.30008	5.89545	5.39283	1.93755	1.91666	5.26748	4.67812	4.75628	5.45715	3.04222	3.59417	1.97323	4.04609	6.16765	1.93243	1.95988	5.7789	3.79801	5.86077	4.05141	5.81616	6.18634	4.85618	3.78821	3.29543
CES4	2.88546	6.07762	2.98693	6.18838	1.93233	2.81296	4.67864	5.32995	2.83619	4.60054	5.80269	4.68564	4.45018	6.32297	3.46539	5.75357	5.94797	4.09764	4.28311	3.78684	2.02528	3.57965	6.23039	5.04885	3.97281	4.62781	1.99235	3.77023	5.00405	4.57434	5.77406	3.10119	4.20263	3.50842	4.90435	1.97323	5.53736	3.87038	6.0134	4.28019	5.05653	1.929	2.00463	6.02885	5.25287	6.1851	5.40295	2.86145	4.66505
IGFL3	4.459	6.29659	3.92657	3.01399	6.07422	1.9685	4.47548	5.92128	6.05837	5.34459	1.92328	4.44225	5.66563	5.0289	4.84797	4.86794	5.21948	3.24469	1.9385	1.96301	5.95466	6.41574	5.77725	5.23944	4.2826	4.73217	1.99235	5.61257	5.7303	2.822	4.83479	2.00993	2.90638	1.93815	4.93761	1.97323	5.56003	3.39172	4.74616	3.54301	2.93985	3.79801	4.01569	4.98149	4.95535	5.53779	1.95233	4.43573	3.92554
NR5A1	6.33878	3.28928	6.40956	4.52898	5.75071	6.39831	3.02787	4.07721	3.75112	5.4398	6.1299	5.2154	4.54577	3.44411	6.2446	1.88175	5.15843	5.06225	6.37257	3.78684	4.79493	5.39928	1.93492	4.94179	5.14579	6.46318	1.99235	1.93755	1.91666	6.09545	4.76395	6.37565	6.46237	1.93815	3.31352	3.03522	4.92864	6.48511	3.75895	1.95988	6.41279	5.34587	6.36009	2.85306	1.91913	5.59371	1.95233	4.43573	3.77426
PKHD1	5.87631	3.76773	1.91915	5.88634	5.9291	1.9685	5.44259	5.74046	4.46142	4.8144	2.8573	5.67413	4.58704	5.01329	5.3323	5.70436	5.76027	3.72323	5.66797	1.96301	2.02528	2.09185	1.93492	5.3761	5.49962	4.49158	4.53565	3.77023	3.60908	5.22313	5.55724	4.30583	5.45715	5.28448	5.91162	3.4973	5.42853	1.9462	3.13143	3.54301	1.94433	5.75831	3.53889	5.73761	3.69169	3.12125	3.52065	2.86145	4.55974
CYP1A1	4.97736	3.28928	3.44953	3.01399	3.61849	4.32554	3.77562	1.91687	2.83619	4.99133	6.25643	1.92734	3.80398	2.98019	3.74614	3.85914	4.49461	6.05018	6.19508	4.12998	4.13978	2.09185	3.92144	5.46963	1.89017	1.94704	5.58833	5.95427	5.15247	5.57121	5.32922	3.8469	1.97841	3.04222	6.13435	3.4973	5.07272	5.8241	4.76642	2.8303	4.68483	3.51752	5.50162	6.22212	5.02959	1.9512	3.24311	2.86145	1.90037
MYBPC1	2.88546	1.94309	5.55639	4.98732	5.19972	5.59746	6.6193	4.3807	6.69468	4.1879	3.30279	5.47881	5.28612	4.7456	3.74614	4.89507	2.70643	5.76252	1.9385	3.04216	4.39818	2.09185	3.16844	6.53956	5.15723	3.64917	6.34635	3.02487	3.32862	5.26748	3.61807	2.00993	2.90638	6.03299	4.31651	1.97323	2.84719	3.87038	1.93243	3.74254	1.94433	6.4695	4.52748	5.66026	6.54077	6.89387	6.04179	3.78821	5.37869
MPPED1	6.0078	5.47043	4.602	4.52898	1.93233	1.9685	4.75315	5.85978	2.83619	5.08455	4.8314	4.88169	3.60551	5.60225	6.30937	5.69696	6.1295	5.53018	4.76474	5.9345	2.02528	2.09185	5.96053	3.76371	6.49193	5.22383	1.99235	3.48943	5.23442	5.32385	5.30514	2.00993	6.09214	3.78903	5.95928	3.03522	4.8385	3.6726	6.36931	2.8303	5.59952	4.42873	3.53889	5.05824	1.91913	1.9512	1.95233	3.30932	3.92554
PAK7	5.51651	4.88746	5.45906	4.67623	1.93233	3.51959	4.11644	6.07069	2.83619	4.92715	4.8314	5.58074	1.91747	5.38174	5.96325	5.55128	6.09345	5.7504	4.87215	5.73698	2.02528	2.09185	5.29607	4.13635	6.05014	5.20673	1.99235	4.11291	4.7523	1.91419	5.74959	2.00993	5.64448	1.93815	5.58205	4.77075	4.14547	1.9462	5.7051	3.26485	4.45722	3.05002	5.2852	5.72134	3.96772	3.59256	4.94183	1.91031	3.77426
MYBPH	1.90756	3.28928	5.8674	4.63224	5.89514	5.45773	6.41492	3.76174	6.58126	2.74558	3.30279	1.92734	5.85827	3.72499	4.3805	3.10641	3.12583	5.56017	3.90057	3.04216	4.13978	2.09185	5.02567	6.56148	3.02964	2.91775	6.29187	1.93755	4.39702	5.33631	4.08505	2.00993	1.97841	4.13066	1.88259	3.03522	3.29573	1.9462	2.71501	1.95988	4.14201	3.51752	2.00463	5.42656	6.57699	6.52693	5.85406	3.58965	3.92554
SCGB3A1	4.34041	5.56062	6.46401	1.97415	4.0884	6.30601	4.2321	6.51212	4.21328	5.3723	6.52199	4.24944	4.84597	5.94572	6.41896	5.90848	6.15167	6.6082	6.5119	6.10691	5.90217	5.53357	1.93492	4.29385	3.88359	3.36863	3.55091	6.45632	6.69563	5.77823	4.42858	2.00993	6.30454	4.2468	6.30881	5.17167	4.69343	6.56304	4.21878	6.63652	6.17033	5.43923	6.71611	6.73056	6.60348	4.92492	4.18462	4.67809	4.1458
PSG4	2.88546	5.34905	4.9903	5.34885	5.53794	3.87261	3.02787	5.61082	5.86331	6.18861	4.05421	5.76845	5.00201	5.4204	5.61752	5.20696	4.06954	5.02979	4.0227	4.34285	6.04639	5.25516	3.16844	4.13635	2.62465	4.92586	3.08578	4.47524	5.18772	4.64276	3.14209	2.00993	5.10498	3.04222	4.06248	3.03522	5.73041	3.6726	4.15171	2.8303	4.94275	3.51752	2.00463	1.90476	6.07965	4.62168	2.81055	5.63969	3.77426
FGF19	3.33731	4.3657	1.91915	4.92338	4.18777	3.24255	3.49514	4.3807	3.75112	5.00296	4.48257	3.94441	5.57399	6.44058	4.08826	4.3966	4.84539	3.24469	2.83132	4.60769	4.13978	3.57965	4.8985	4.68858	6.16732	3.36863	4.38593	1.93755	1.91666	1.91419	5.45333	2.00993	1.97841	4.86198	4.52986	6.35887	4.91223	2.9381	6.8847	2.8303	1.94433	4.91676	6.20806	5.27885	3.21438	5.11063	5.84821	3.78821	2.84807
MYH7	3.81606	3.28928	5.50142	1.97415	5.82249	5.17123	6.42512	4.8829	6.12547	3.1688	2.8573	1.92734	5.64556	4.06802	1.9036	5.12161	2.70643	5.89561	4.45659	4.49323	4.39818	2.09185	3.92144	6.38493	3.6535	4.62781	6.38885	1.93755	4.5032	4.01564	3.14209	2.00993	1.97841	3.50842	3.94271	3.77828	3.29573	1.9462	3.40523	3.26485	4.14201	3.79801	3.07584	5.6038	6.33969	6.69922	5.67968	4.43573	2.84807
GSTM1	6.10528	6.81604	2.98693	6.84757	2.88928	3.24255	4.47548	4.27931	4.71826	5.55492	6.66777	6.4732	5.85389	4.97985	6.47994	4.3966	5.26606	6.24659	6.53317	5.57854	3.66739	6.07611	6.73194	5.85814	6.6042	5.29807	4.02692	6.26195	1.91666	6.41572	1.88593	3.56604	6.72958	3.78903	4.88659	3.4973	5.70212	6.50123	4.7025	1.95988	6.40438	5.70264	4.87398	5.13074	1.91913	5.74566	4.90976	6.06805	6.10308
NCRNA00162	4.55386	1.94309	5.9804	1.97415	4.90009	5.58033	5.70914	2.71364	4.46142	2.74558	4.8914	3.79302	4.50041	1.89913	5.04408	3.58086	4.21245	3.24469	5.41895	1.96301	5.13311	6.2018	3.16844	5.29382	4.17888	5.75722	3.55091	4.92334	5.49644	4.60987	4.83479	4.95036	5.08016	1.93815	3.31352	4.41758	5.57278	5.76145	4.2784	3.74254	6.10235	1.929	4.84313	1.90476	5.98612	3.59256	1.95233	4.61084	3.92554
NHLH2	1.90756	4.56236	1.91915	5.11829	5.36614	1.9685	5.2389	3.76174	5.85367	5.53838	1.92328	4.58003	5.21786	4.28074	5.25342	5.31498	3.98165	5.14463	3.26987	1.96301	5.09368	5.3821	3.64332	5.13108	5.52225	1.94704	3.08578	5.05614	5.55139	4.92911	4.50496	2.00993	2.90638	3.78903	3.94271	5.17167	5.34857	3.6726	5.61339	5.5759	2.93985	4.73904	2.00463	2.85306	5.76689	5.62848	2.81055	5.34046	5.40295
WDR49	4.18513	1.94309	5.77747	5.21388	1.93233	4.85995	3.49514	4.15321	3.75112	1.93246	5.25673	5.5785	1.91747	5.50909	5.13697	4.86794	2.70643	5.01829	5.85031	3.78684	2.02528	2.09185	1.93492	3.56486	5.29311	4.84052	1.99235	3.77023	5.43939	5.28477	3.61807	4.95036	5.55626	4.91326	4.57081	4.83523	4.59623	5.85505	2.71501	3.26485	4.14201	4.13858	5.4816	4.99547	3.69169	3.12125	2.81055	2.86145	4.77438
CLEC2L	5.75574	4.98626	4.81454	1.97415	5.08048	1.9685	3.97022	5.67176	3.75112	3.1688	3.58274	5.93533	3.32509	5.24753	5.89052	5.18474	5.88602	5.62459	5.06157	4.49323	2.02528	3.57965	5.28618	5.66344	4.44216	4.97946	1.99235	3.77023	2.87895	4.53581	5.91483	5.936	3.35091	4.42223	3.94271	3.97446	5.72928	5.59446	5.74553	3.26485	3.39408	5.70074	4.87398	3.58093	1.91913	5.74753	2.81055	3.30932	3.92554
B3GNT6	1.90756	3.76773	5.42375	3.01399	1.93233	6.12255	3.02787	5.51488	1.95319	3.64387	5.86294	4.91869	1.91747	5.45847	3.94133	5.18474	4.69378	5.96277	5.59534	4.98576	2.02528	2.09185	1.93492	4.65831	3.02964	3.36863	1.99235	4.96633	6.00844	5.36784	4.67812	4.18931	5.29429	1.93815	4.86794	3.4973	4.14547	5.48243	5.30134	5.2626	4.97897	3.05002	4.01569	5.90443	5.73372	1.9512	4.89272	1.91031	5.0416
CASP14	4.59484	4.70003	5.03961	4.63224	5.71281	3.51959	5.22976	1.91687	4.40984	6.03985	4.80924	3.31415	5.70572	3.72499	5.13697	4.30479	3.12583	4.55557	1.9385	3.04216	5.62038	5.64191	3.64332	6.10264	3.30008	3.64917	6.44604	6.39712	6.0451	3.26321	3.14209	3.10119	4.61935	5.18799	5.42591	1.97323	5.82316	4.71779	5.09477	6.1498	5.21208	5.61828	4.01569	1.90476	1.91913	4.76226	2.81055	6.2074	4.89744
CLDN19	5.44309	3.28928	5.57068	3.01399	3.3381	5.05328	1.91018	1.91687	4.02626	5.02514	6.06227	1.92734	3.80398	1.89913	4.84797	4.9204	3.40036	3.24469	6.04862	1.96301	2.02528	5.0089	1.93492	3.56486	1.89017	6.07481	5.02562	3.02487	3.60908	5.06	3.14209	5.50347	1.97841	1.93815	3.79225	1.97323	5.15815	5.91232	3.60463	3.54301	5.65836	4.55717	5.25474	4.15098	3.96772	3.12125	4.43482	4.15945	4.1458
FEZF1	6.05066	3.76773	5.83	5.86007	2.88928	4.66039	1.91018	5.99668	1.95319	4.54684	1.92328	5.24574	4.07535	5.6963	5.83976	3.65625	5.43004	5.72677	3.26987	5.22601	2.02528	2.09185	4.11194	3.84109	4.92675	4.79014	1.99235	3.48943	2.87895	4.92583	5.54934	4.30583	5.17753	1.93815	5.97146	3.4973	4.18493	4.52176	5.03011	1.95988	5.75309	5.6878	5.90367	4.45433	3.69169	3.12125	5.28079	1.91031	1.90037
PTPRT	5.19742	4.04178	4.4388	3.75463	1.93233	2.81296	3.49514	6.22163	3.75112	2.74558	5.11982	3.31415	3.32509	5.86118	6.07364	4.53998	5.46947	5.46676	5.75266	5.91441	2.02528	2.09185	5.87816	4.03637	5.93956	3.99806	3.08578	5.2285	5.97829	5.46223	6.16305	2.00993	3.82961	3.04222	5.55005	3.03522	4.47164	4.60531	5.47499	4.45506	4.24029	5.68094	3.07584	5.82903	5.3518	3.12125	4.38278	5.10903	5.48658
AADACL2	4.40331	5.64654	4.72147	5.60818	2.88928	5.15411	5.19042	5.25298	3.75112	1.93246	3.93313	5.05111	1.91747	5.71314	5.80235	4.47376	5.69315	4.92555	4.0227	5.35494	4.87504	5.76724	5.65421	1.90676	5.67896	4.3007	1.99235	5.70272	3.80745	3.54254	5.61583	2.00993	5.88705	4.2468	6.00793	1.97323	3.77455	2.9381	5.35116	3.26485	6.35542	3.99251	5.04137	4.42747	1.91913	4.83533	3.72024	3.78821	4.69518
DMBT1	4.59484	5.25709	6.54384	1.97415	3.61849	6.28889	5.31818	6.68215	4.6253	5.77174	6.54134	4.32213	5.02933	5.8968	6.47187	5.59119	6.13745	6.77087	6.5749	6.08372	5.58629	2.09185	1.93492	5.25236	4.78303	4.84052	4.95934	6.41358	6.8366	5.82496	4.57048	4.40142	6.64619	3.78903	6.06453	3.4973	5.03881	6.66654	6.1471	6.37843	6.35734	3.79801	6.44435	6.82591	6.61766	4.62168	3.52065	3.58965	3.92554
SHISA6	5.11508	5.5924	3.73054	4.1	1.93233	1.9685	4.8708	4.46486	4.50808	2.74558	3.30279	3.94441	4.84597	4.7456	5.12514	4.47376	5.836	4.9403	4.98576	3.04216	2.02528	2.09185	4.65821	3.76371	5.45223	2.91775	3.08578	5.38531	5.23442	2.822	4.22638	3.10119	1.97841	3.04222	5.33968	1.97323	1.89203	1.9462	5.56496	2.8303	4.02267	5.40191	3.81979	5.27285	1.91913	3.12125	2.81055	2.86145	3.29543
CXorf49B	4.91077	3.76773	5.29711	1.97415	5.23163	4.77466	5.2888	5.24257	5.19296	4.41407	5.24327	5.10806	5.38959	1.89913	5.73785	6.04956	3.75402	4.09764	2.83132	1.96301	6.55531	2.09185	1.93492	3.76371	3.30008	4.11812	5.51134	4.11291	5.90363	5.13838	4.62763	2.00993	4.36036	5.7489	3.59417	6.05723	4.66341	3.39172	2.71501	3.74254	4.32329	5.57567	2.00463	3.77951	4.98181	3.59256	3.52065	4.15945	5.01696
KRT2	3.618	4.75542	1.91915	4.8995	4.0884	2.81296	5.51185	1.91687	3.90389	4.60054	3.58274	1.92734	4.25854	4.80498	1.9036	4.53998	3.40036	3.72323	2.83132	4.80795	5.59521	4.05762	3.16844	3.56486	5.02067	2.91775	5.62171	6.26714	5.88637	4.01564	4.50496	3.10119	1.97841	6.13936	4.80589	4.23987	2.84719	2.9381	4.42444	4.61971	6.25748	4.25416	3.07584	2.85306	3.21438	3.12125	3.52065	6.06779	5.42894
CSAG3	5.98075	1.94309	5.60137	4.21806	6.00385	3.51959	5.94443	5.85828	5.84201	5.3797	4.61325	5.51235	6.06587	2.98019	4.61117	5.63694	3.12583	4.37771	6.05859	1.96301	2.02528	5.22857	3.16844	5.87317	4.43738	6.1396	4.77978	5.87023	2.87895	4.20142	5.73944	4.40142	4.20263	5.17204	4.41949	5.91656	5.58989	4.13991	2.71501	3.74254	6.10728	5.56057	5.95317	1.90476	5.22874	3.12125	4.73914	4.57211	3.92554
C20orf114	1.90756	5.49583	6.75885	5.48981	1.93233	6.48571	4.11644	6.63621	5.13159	5.64171	6.809	5.80975	1.91747	6.68441	6.54116	5.96427	6.1348	6.85895	6.73142	6.37	6.38048	5.71459	1.93492	4.46493	4.61128	2.91775	4.81569	6.74692	6.85811	6.54732	5.10154	4.83152	6.63509	3.04222	6.31427	6.10829	6.04504	6.80116	2.71501	6.63759	6.48794	5.61564	6.62437	6.99765	6.51499	3.12125	3.24311	3.30932	5.78616
TBX5	5.8221	5.84423	5.48675	4.81793	4.97038	3.24255	4.9807	3.60751	1.95319	3.92182	3.58274	2.8677	4.88652	3.92061	4.56339	5.42232	5.41582	5.45512	1.9385	1.96301	2.02528	4.74055	4.97983	5.68211	3.02964	3.99806	5.39283	5.77881	3.60908	2.822	5.36549	2.00993	1.97841	3.50842	5.85895	1.97323	5.6319	3.6726	4.42444	5.21371	4.60686	5.11531	3.53889	3.30059	4.63551	1.9512	4.81595	4.61084	3.92554
MIOX	5.25656	1.94309	5.74596	3.95132	3.61849	5.67913	1.91018	3.13336	3.27328	1.93246	4.94333	3.31415	1.91747	4.06802	5.48288	3.58086	3.98165	3.52413	5.6916	1.96301	3.66739	5.41557	3.64332	3.56486	4.11834	5.48915	3.08578	3.02487	1.91666	5.22984	4.92159	5.50849	4.75582	4.13066	4.48486	1.97323	3.77455	5.73397	3.40523	1.95988	5.65044	3.51752	5.46012	3.77951	1.91913	1.9512	4.09827	4.37947	4.23001
FOXJ1	6.05077	3.76773	5.81073	4.31511	2.88928	6.02868	3.49514	5.33787	3.75112	3.44434	5.25007	4.88169	2.87605	5.85047	5.29891	5.72358	5.89874	4.25629	6.10364	3.78684	3.66739	4.325	1.93492	5.59371	3.77894	5.63195	3.55091	3.96569	5.98328	6.12848	5.96026	5.78607	3.82961	4.2468	4.70458	4.12249	5.79358	6.03013	2.71501	3.74254	6.08213	5.55983	6.23141	5.84948	4.95535	5.71153	3.72024	3.30932	5.62624
MUC5B	4.08637	5.60903	6.70418	3.01399	3.61849	6.41194	4.2321	6.58375	5.48628	5.7314	6.82116	5.48835	4.33085	6.52524	6.29837	6.23389	6.24104	6.96551	6.62145	6.43926	6.27431	2.09185	3.92144	5.4266	4.5871	4.37271	4.59609	6.60067	6.88863	6.47282	4.08505	4.97529	6.64214	4.2468	6.36905	5.62177	5.39522	6.71707	5.11112	6.7819	6.38874	5.49789	6.35029	7.05181	6.70086	4.62168	4.38278	3.78821	5.61389
PDE11A	4.18513	4.47396	3.44953	5.84993	5.73053	1.9685	4.8708	5.83711	4.35226	4.25433	4.37535	3.79302	5.42272	5.27063	4.79299	4.73563	5.75374	4.73495	4.34776	1.96301	4.57012	2.09185	3.92144	5.39656	5.41064	5.19785	3.83167	3.02487	4.33387	3.54254	5.7755	2.00993	3.98136	3.98401	5.5337	3.03522	5.6003	3.39172	3.40523	4.34536	1.94433	3.51752	4.45775	5.38771	4.15578	6.00424	4.32473	2.86145	4.04624
SLC13A2	1.90756	1.94309	5.61419	3.75463	2.88928	4.48355	3.02787	5.39794	4.46142	2.74558	5.57094	4.38583	3.80398	5.44633	4.79299	4.30479	4.14564	5.78253	5.29327	4.83875	3.66739	2.09185	3.16844	2.83973	3.6535	3.84738	1.99235	5.00494	5.75961	4.11626	4.22638	2.00993	5.09278	4.13066	4.73239	4.73439	4.04609	5.39151	3.60463	5.35255	4.99584	4.61014	4.87398	5.81564	5.00646	3.59256	2.81055	2.86145	1.90037
MAGEA6	6.48678	4.95605	6.24957	6.29102	6.51048	3.51959	6.45303	6.43159	6.48107	5.19985	5.56172	6.09205	6.49554	5.278	5.87287	6.22159	5.01005	5.51142	6.4294	3.04216	2.02528	6.60934	1.93492	6.38138	4.50573	6.54859	1.99235	6.43321	4.98962	6.31947	6.41636	5.76755	1.97841	5.86491	3.59417	4.33629	6.44919	3.87038	3.13143	5.02923	6.54366	3.51752	6.65507	3.93078	3.96772	1.9512	6.22476	5.56043	1.90037
C10orf82	5.37343	4.98626	4.55375	1.97415	1.93233	1.9685	3.02787	2.71364	3.27328	4.41407	1.92328	1.92734	3.80398	3.44411	5.15943	5.31498	4.89018	3.52413	2.83132	4.24687	3.66739	3.57965	4.53461	5.53014	3.30008	5.29139	3.08578	1.93755	5.25548	1.91419	4.50496	3.10119	4.20263	3.04222	5.35817	3.03522	5.26453	3.39172	3.98721	4.50189	4.7805	5.32464	3.53889	4.05141	4.40564	1.9512	1.95233	1.91031	1.90037
ARG1	4.40331	5.42764	6.15968	3.01399	2.88928	3.99593	5.10788	4.86801	3.27328	4.45773	3.93313	1.92734	3.32509	5.67923	4.50999	4.1925	5.76107	4.4288	1.9385	4.34285	5.62038	5.81117	5.08512	5.66045	4.11834	4.21709	1.99235	6.17021	1.91666	3.89392	5.52421	5.02074	5.50235	1.93815	5.49492	1.97323	4.30188	3.6726	5.50149	1.95988	5.8806	3.05002	5.60941	4.67012	3.21438	3.87218	1.95233	4.94375	4.23001
IL20	1.90756	1.94309	4.49978	1.97415	5.4121	3.51959	4.63587	3.60751	5.45667	5.93668	4.05421	3.59428	5.52942	3.72499	1.9036	5.09261	3.40036	3.52413	1.9385	4.80795	6.15921	6.06653	1.93492	5.74206	5.02067	5.71238	5.78339	4.63732	5.64845	3.54254	3.61807	3.10119	3.63064	3.04222	3.94271	5.74944	5.51519	5.26871	4.92737	5.24936	4.02267	3.05002	3.07584	1.90476	5.94595	5.11063	4.09827	5.40311	4.30254
MAGEA3	6.38943	1.94309	5.7883	6.50462	6.48269	1.9685	5.9589	6.38794	5.52431	4.11223	5.81928	6.26119	6.41006	5.66315	5.52491	6.30225	5.09208	4.89415	6.38423	1.96301	2.02528	6.35682	1.93492	6.28488	4.32756	6.40968	3.55091	6.43604	5.05671	6.19311	6.31088	4.95036	1.97841	6.15913	1.88259	1.97323	6.35791	4.23828	1.93243	5.16527	6.50737	1.929	6.6335	3.58093	3.21438	1.9512	5.96936	5.82001	1.90037
TH	4.26854	3.76773	5.52867	3.47352	5.82693	1.9685	5.68225	3.60751	5.49553	5.75566	1.92328	3.59428	4.74987	2.98019	3.46539	3.10641	3.12583	4.4288	1.9385	3.78684	6.28552	2.09185	1.93492	4.22093	2.62465	5.47838	3.08578	5.45777	5.59498	3.74168	3.89542	4.83152	3.98136	3.04222	3.94271	4.5486	5.3791	1.9462	2.71501	5.04173	5.84502	3.51752	3.07584	3.58093	4.82633	4.06497	3.52065	4.76255	5.39509
ADH1C	1.90756	3.28928	6.1168	6.10663	3.61849	4.43625	4.63587	5.80658	4.96337	2.74558	6.33225	6.24637	2.87605	6.42643	4.65429	4.96636	4.14564	5.09196	5.79419	5.21836	2.02528	3.57965	3.16844	3.28494	5.311	4.54154	1.99235	5.55084	6.14549	6.1079	5.33683	4.86464	3.82961	6.26448	5.41503	3.77828	5.83272	6.43851	3.75895	4.01819	5.07025	6.36634	5.95012	5.73077	4.98181	4.95073	4.83658	4.83259	4.04624
CTSE	4.9923	3.28928	3.44953	3.47352	4.0884	5.42924	3.02787	2.71364	2.83619	4.1879	4.67585	3.59428	3.32509	3.44411	1.9036	3.85914	2.70643	2.80323	5.56057	3.04216	2.02528	2.09185	1.93492	1.90676	4.11834	4.99576	4.29036	4.11291	1.91666	4.92911	1.88593	4.61172	4.10254	6.19608	1.88259	4.80422	4.36524	5.57379	2.71501	3.89549	4.24029	4.93993	4.45775	4.05141	3.96772	1.9512	4.43482	4.92734	5.78705
WISP3	5.71605	3.28928	5.65956	3.01399	5.26761	1.9685	1.91018	4.3807	4.65855	5.21265	5.19924	5.1184	2.87605	4.28074	5.40004	4.98736	4.21245	4.7098	5.48968	3.04216	4.57012	5.91841	3.16844	5.82163	4.92566	5.75462	1.99235	5.94386	3.95832	5.44957	4.08505	5.02074	4.20263	5.73589	5.10103	3.77828	5.07272	5.8261	3.75895	4.50189	5.3426	5.25976	5.88901	3.58093	4.49546	5.76548	5.74533	3.30932	5.75233
DSCAM	3.81606	1.94309	4.07439	3.75463	4.0884	1.9685	3.97022	2.71364	5.52703	5.36074	2.8573	4.0653	5.70017	3.72499	1.9036	4.1925	5.467	4.75868	2.83132	1.96301	4.13978	2.09185	3.16844	5.32041	3.77894	5.43087	5.47156	4.58941	5.471	1.91419	3.61807	2.00993	4.10254	3.50842	3.79225	3.77828	4.69343	1.9462	3.60463	5.9052	3.67499	3.51752	3.53889	1.90476	5.54368	3.59256	3.24311	4.43573	4.04624
C6orf186	4.40331	4.70003	2.98693	4.67623	3.3381	2.81296	3.49514	5.01704	3.75112	2.74558	4.23867	3.31415	4.1746	5.56295	3	4.86794	5.73664	5.36121	4.9566	5.02447	2.02528	2.09185	4.36611	4.55237	4.36883	2.91775	3.83167	4.84832	4.2616	4.64276	4.67812	3.56604	1.97841	4.2468	5.18116	3.77828	1.89203	2.9381	5.07762	1.95988	1.94433	4.70021	2.00463	5.78542	4.29564	4.86748	4.97143	3.93938	4.04624
CYP2C19	3.34073	1.94309	4.66817	4.54931	3.6908	5.62213	4.03026	4.4292	1.95319	1.93246	5.21644	1.92734	2.87605	5.00487	5.50786	5.25582	5.62788	4.59343	4.76474	5.25899	3.66739	2.09185	4.73338	1.90676	4.80152	3.99806	1.99235	5.24494	5.66118	5.68246	4.67428	3.82354	5.16215	3.04222	4.32969	3.03522	3.57604	5.01102	4.82393	3.654	5.37962	5.12148	3.25061	4.51196	4.14119	1.9512	5.40142	3.25253	4.50643
FAM71F1	2.88546	1.94309	4.49978	1.97415	1.93233	3.24255	3.02787	4.98496	4.21328	3.44434	5.34271	1.92734	3.60551	3.72499	5.70598	5.36398	4.32503	5.28728	5.26944	3.98257	2.02528	2.09185	4.36611	4.13635	5.16282	4.49158	4.46645	3.02487	3.32862	2.822	5.25053	3.10119	3.82961	3.04222	4.43501	3.03522	5.01424	5.63801	4.46495	1.95988	4.9233	1.929	4.37669	4.82478	1.91913	1.9512	3.87339	3.30932	3.77426
ACTC1	4.50883	4.56236	6.1969	5.32747	6.13464	5.95336	6.6252	3.98932	6.85517	4.77536	4.64329	4.88169	5.95161	4.63686	1.9036	3.58086	1.91133	5.98996	4.68374	4.4237	3.66739	2.09185	4.70912	6.73796	5.00354	4.43571	6.53177	4.63732	4.72434	5.59136	4.72322	4.40142	1.97841	5.01761	4.06248	3.77828	3.92561	2.9381	4.56907	3.89549	5.10851	3.51752	2.00463	5.87209	6.70975	6.78918	6.1977	4.78727	3.77426
FAM153A	5.45382	1.94309	1.91915	3.47352	3.3381	3.99593	3.02787	3.40816	3.55175	3.92182	2.8573	1.92734	3.32509	3.44411	3.46539	3.58086	4.56103	4.32061	5.18525	4.80795	2.02528	2.09185	4.11194	4.79175	5.21395	2.91775	3.55091	3.77023	5.38219	5.67098	4.83479	2.00993	3.63064	4.42223	4.96812	3.97446	4.22945	3.39172	4.82183	2.8303	2.93985	3.51752	4.80975	1.90476	4.63551	5.11063	3.52065	4.70816	5.05333
QRFPR	5.38251	5.71651	4.07439	1.97415	2.88928	1.9685	3.02787	5.49955	6.10011	5.34871	5.76021	1.92734	5.22539	1.89913	1.9036	5.47957	5.84901	5.77403	4.0227	1.96301	5.80853	2.09185	5.80455	4.62572	4.05025	5.18873	3.08578	5.68347	4.45306	1.91419	6.02284	2.00993	5.71074	3.50842	5.66252	6.14009	1.89203	4.64607	6.07922	1.95988	5.3868	3.51752	6.20931	5.89031	4.15578	5.91121	3.87339	3.30932	5.92745
MYLPF	4.83002	1.94309	5.74027	4.31511	5.75312	5.11714	6.23816	2.71364	6.32609	2.74558	3.58274	3.79302	5.68574	3.44411	3.74614	4.30479	4.14564	5.00639	3.74808	3.98257	2.02528	4.50447	3.92144	6.33794	3.30008	3.99806	6.10663	3.02487	4.17783	4.87888	4.08505	3.10119	3.63064	4.2468	4.43501	3.4973	2.84719	3.87038	3.60463	3.26485	4.24029	1.929	4.28053	4.88442	6.27906	6.5013	5.73727	3.30932	3.29543
CCDC67	5.09371	4.04178	4.86648	1.97415	1.93233	5.05328	4.67864	4.8364	3.27328	4.11223	2.8573	3.94441	3.95492	4.77636	4.2046	4.30479	4.98898	5.10133	5.6073	1.96301	2.02528	2.09185	4.11194	4.03637	4.81313	2.91775	1.99235	1.93755	4.45306	4.39636	5.50393	2.00993	4.28729	3.50842	5.30431	3.03522	4.22945	5.18349	1.93243	2.8303	4.80811	5.15459	4.01569	4.15098	3.21438	1.9512	1.95233	3.58965	3.29543
LHFPL1	3.81606	3.28928	4.07439	4.75294	2.88928	2.81296	3.02787	5.01704	4.28736	1.93246	3.30279	5.2154	4.07535	5.09809	5.04408	4.59777	4.37322	4.96818	4.90818	4.86739	2.02528	2.09185	3.64332	2.83973	4.81313	3.36863	3.08578	4.22956	5.20404	3.26321	5.17198	2.00993	2.90638	4.42223	5.11095	1.97323	1.89203	1.9462	4.53684	1.95988	3.67499	5.64087	2.00463	4.60275	3.69169	3.59256	1.95233	3.30932	3.77426
FAM92B	1.90756	3.28928	4.64555	1.97415	3.61849	2.81296	3.02787	4.67748	1.95319	3.79783	4.37535	1.92734	4.07535	5.4204	1.9036	4.9204	1.91133	4.09764	2.83132	4.55397	4.99952	2.09185	4.45767	2.83973	3.49879	1.94704	4.29036	4.7891	5.29979	5.45598	5.3214	3.10119	3.98136	4.5514	5.0583	1.97323	4.6311	1.9462	2.71501	4.54455	3.39408	4.13858	4.28053	5.343	4.49546	1.9512	2.81055	4.43573	5.45601
SPINK6	3.618	5.62844	6.04679	3.47352	5.80478	4.18486	6.40012	1.91687	5.64792	5.84804	5.23635	5.01202	6.38703	1.89913	3.46539	5.18474	1.91133	4.59107	3.26987	5.33339	6.66048	4.95615	4.70912	4.55237	3.6535	5.88224	1.99235	6.41577	5.66514	4.20142	3.14209	5.38018	6.42209	1.93815	4.24464	5.00315	5.14093	4.64607	5.23671	5.31627	5.91412	3.99251	5.57781	3.30059	5.30622	5.41594	3.87339	5.65139	5.33327
FOXA2	1.90756	3.76773	4.49978	3.95132	3.3381	1.9685	4.53545	1.91687	5.3014	5.6832	4.15409	1.92734	4.72189	3.44411	5.23668	4.1925	3.12583	4.89415	4.54537	4.4237	4.6964	2.09185	3.92144	4.62572	2.62465	1.94704	5.08195	3.48943	4.33387	3.74168	3.14209	4.30583	1.97841	3.50842	3.94271	5.54513	5.13197	1.9462	4.95295	3.89549	4.71917	3.51752	4.16341	4.84571	5.02959	3.12125	2.81055	1.91031	5.56864
LOR	5.29467	5.69718	5.86824	4.21806	3.3381	3.24255	5.17978	3.40816	4.46142	4.7089	3.93313	5.01202	1.91747	4.06802	4.61117	4.1925	5.02015	4.37771	3.26987	3.04216	6.10765	6.43	4.83293	5.23944	4.65592	3.64917	1.99235	6.21048	4.2616	5.36784	4.08505	2.00993	3.82961	4.80316	5.12058	1.97323	2.84719	3.87038	5.57217	2.8303	6.05933	4.13858	4.73398	2.85306	1.91913	4.92492	3.52065	4.57293	5.5509
NELL1	5.46416	5.16552	4.55375	5.78927	1.93233	3.24255	1.91018	5.72853	3.27328	5.00296	5.08864	1.92734	5.08973	5.45044	1.9036	5.79928	5.69734	5.3886	5.3602	5.20759	2.02528	4.05762	5.81783	5.49877	3.49879	5.71694	1.99235	4.22956	4.5032	3.26321	5.84161	4.83152	6.25031	4.34202	5.10103	1.97323	5.27638	4.64607	3.13143	1.95988	3.87268	3.51752	6.07795	5.27285	3.69169	4.06497	1.95233	1.91031	4.55974
KIF1A	5.53549	4.47396	3.44953	3.95132	5.19121	2.81296	4.8708	5.05582	4.28736	6.22864	4.15409	3.79302	5.23992	5.38687	5.41481	6.05665	4.61898	6.25195	6.45525	6.22418	3.66739	4.325	4.53461	6.32018	3.30008	4.54154	3.83167	4.22956	4.72434	1.91419	5.33683	2.00993	2.90638	4.34202	6.13097	1.97323	5.51774	2.9381	4.67883	3.74254	3.39408	5.90037	2.00463	4.7794	4.40564	4.41686	4.60029	1.91031	3.57564
CHRM1	4.459	1.94309	5.03961	3.47352	4.18777	2.81296	4.2321	5.03696	1.95319	3.64387	5.33253	1.92734	3.60551	4.71236	4.72938	4.1925	3.98165	5.54984	4.28311	5.42864	4.6964	2.09185	3.64332	2.83973	4.6766	3.64917	3.08578	1.93755	4.98962	1.91419	4.67812	2.00993	2.90638	3.04222	5.76143	3.03522	3.77455	2.9381	4.92737	5.07684	4.68483	5.45857	2.00463	5.59995	4.29564	1.9512	3.52065	2.86145	3.29543
AKNAD1	4.89208	3.76773	4.75488	3.01399	5.31787	5.34373	5.06534	3.13336	5.09096	4.56877	5.19924	1.92734	4.65965	1.89913	1.9036	3.85914	4.32557	4.25629	5.02563	3.78684	5.30642	5.25516	1.93492	3.76546	3.77894	5.25561	5.55446	5.24725	3.60908	3.54254	3.61807	5.23989	5.15	3.04222	4.43551	3.97446	1.89203	3.87038	3.40523	5.32209	5.18419	1.929	4.77355	2.85306	4.7417	4.72029	3.52065	4.61084	4.82001
GABRB3	4.83002	3.76773	4.07439	3.01399	3.3381	6.07613	5.57015	5.31766	3.55175	6.06394	4.60814	5.8801	5.78479	6.01393	5.85024	5.83007	4.2718	5.80252	4.34776	6.21016	2.02528	4.63693	4.53461	5.2708	5.02892	5.58637	3.83167	4.58941	5.49644	6.06869	5.86328	3.10119	3.35091	3.50842	6.36359	3.03522	5.58294	3.87038	5.32307	4.28019	4.60686	5.79726	3.07584	5.75706	3.69169	3.12125	4.63382	3.93938	3.92554
CRISP3	5.08254	3.76773	5.89568	4.52898	1.93233	5.71208	4.32696	5.69106	3.55175	4.85001	6.05324	1.92734	4.98755	3.44411	5.50118	5.79559	5.08385	6.26871	6.01102	5.34791	4.13978	5.36399	3.16844	3.56486	3.88359	3.84738	3.55091	6.1209	6.32014	4.4475	3.14209	2.00993	5.67226	3.98401	4.43501	3.4973	4.55837	5.43395	5.44015	5.97668	5.81268	1.929	5.44294	6.37472	5.96431	1.9512	1.95233	1.91031	5.79929
FAM69C	3.618	4.04178	4.28787	4.1	4.63822	1.9685	4.32696	4.07721	4.68941	2.74558	4.80924	6.11653	4.92326	6.0321	5.39494	4.1925	5.23042	4.4288	4.54537	5.87705	2.02528	2.09185	5.48019	5.47569	5.79931	3.36863	3.08578	3.02487	4.2616	4.57434	4.97006	3.10119	5.26553	5.08399	5.5739	4.48753	3.92561	5.6401	5.76137	3.26485	5.25395	5.0019	4.58834	4.52342	3.21438	5.22038	4.25929	2.86145	1.90037
GOLGA6L1	5.1633	4.75542	2.98693	4.21806	4.40736	6.00953	3.02787	2.71364	5.37319	4.1879	5.21459	5.30799	4.07535	3.44411	4.2046	4.73563	4.37322	2.80323	5.19316	4.80795	5.09368	6.02684	3.16844	1.90676	1.89017	2.91775	4.1739	4.94546	5.29979	5.53069	3.61807	2.00993	5.26553	5.62422	3.59417	3.4973	4.47164	3.6726	2.71501	3.89549	4.80811	3.79801	4.37669	3.30059	5.00646	1.9512	3.24311	4.76255	4.66505
AACSL	5.31774	4.04178	5.51537	3.01399	3.96802	3.51959	4.32696	2.71364	3.75112	4.63024	3.58274	2.8677	3.60551	2.98019	3	4.77301	2.70643	3.24469	4.97145	1.96301	2.02528	5.73148	3.92144	4.71687	3.6535	4.54154	1.99235	5.16492	4.07861	4.64276	4.22638	5.67072	3.98136	5.69805	3.59417	3.77828	4.81768	5.84611	1.93243	4.28019	5.31787	3.79801	5.00044	1.90476	1.91913	1.9512	2.81055	3.78821	3.92554
BEX1	4.18513	3.28928	3.73054	4.67623	5.56409	3.71919	3.02787	3.88603	2.83619	3.92182	2.8573	2.8677	3.80398	5.21382	4.61117	5.42232	3.12583	5.86806	5.02563	5.86382	2.02528	4.50447	4.25413	4.85495	4.85439	4.3007	1.99235	3.02487	3.95832	2.822	5.66806	3.56604	4.20263	3.04222	5.388	4.60266	5.82982	4.45549	5.24753	2.8303	2.93985	5.70824	2.00463	3.58093	4.49546	3.12125	3.72024	4.15945	4.51832
PRMT8	2.88546	4.56236	2.98693	1.97415	4.5591	1.9685	4.89546	3.40816	4.8592	5.46575	4.67585	4.38583	5.41073	4.06802	3.46539	1.88175	4.37322	4.09764	2.83132	3.04216	4.6964	4.89561	1.93492	2.83973	3.88359	3.84738	3.08578	3.48943	5.78477	4.01564	3.14209	2.00993	6.16039	1.93815	4.99629	3.03522	4.7724	3.6726	3.60463	1.95988	1.94433	4.25416	2.00463	3.58093	5.00646	5.39642	1.95233	2.86145	2.84807
C3orf16	3.9665	3.76773	5.06906	3.75463	4.97038	4.48355	1.91018	4.59828	1.95319	5.39771	3.93313	5.73018	4.69189	5.16612	3.46539	3.58086	4.59098	4.75868	5.22299	5.07584	2.02528	2.09185	4.11194	1.90676	3.88359	5.40387	4.29036	1.93755	5.98287	5.32664	4.33768	4.71307	3.35091	3.04222	4.06248	3.4973	5.45201	2.9381	4.07537	1.95988	4.56215	3.51752	3.53889	5.37498	6.02509	1.9512	1.95233	4.98913	4.47277
BEST3	3.81606	1.94309	4.602	1.97415	4.73535	4.32554	5.89529	3.13336	6.09864	4.02474	1.92328	3.59428	4.58704	4.06802	1.9036	3.10641	3.87835	4.47496	4.40516	4.12998	2.02528	2.09185	3.92144	5.86594	4.40689	1.94704	5.37139	3.77023	2.87895	2.822	4.83479	3.10119	3.35091	1.93815	4.95318	4.33629	2.84719	2.9381	2.71501	3.54301	1.94433	3.79801	2.00463	4.60275	5.87245	6.23963	5.33187	3.93938	3.57564
DMRTC1B	1.90756	3.76773	2.98693	3.95132	1.93233	2.81296	5.15746	3.40816	1.95319	4.7089	4.05421	2.8677	3.60551	5.25541	4.99533	4.47376	4.71604	4.4288	4.0227	3.98257	4.13978	3.57965	3.92144	2.83973	5.08192	1.94704	1.99235	4.40592	4.17783	4.94449	4.80091	2.00993	1.97841	1.93815	4.96812	1.97323	4.22945	3.39172	2.71501	4.01819	3.67499	4.89214	2.00463	4.52342	3.69169	3.59256	1.95233	5.08807	5.22943
FAM181A	1.90756	4.22772	5.82017	3.75463	4.6004	5.82825	3.49514	4.8829	1.95319	4.1879	5.45085	3.59428	3.95492	4.97985	3.94133	3.85914	3.87835	4.25629	5.27556	1.96301	4.13978	2.09185	1.93492	4.85495	4.87964	4.54154	1.99235	3.02487	4.17783	5.34102	5.22996	4.55125	5.61347	1.93815	4.90435	3.03522	4.91223	5.31086	3.13143	1.95988	2.93985	4.83766	5.24393	2.85306	3.69169	4.86748	4.25929	3.78821	2.84807
NGB	5.80919	5.57924	6.21552	3.75463	5.30603	4.43625	4.2321	3.13336	4.12747	5.26471	4.7061	3.59428	5.18596	4.71236	5.56977	4.64881	1.91133	5.30255	4.94113	3.78684	4.79493	5.16865	3.16844	5.13108	1.89017	4.88548	1.99235	1.93755	4.66224	5.26748	4.92159	4.30583	5.87321	1.93815	4.90435	3.77828	4.30188	5.53647	4.42444	3.89549	4.60686	4.65749	5.98985	4.3077	1.91913	5.56154	3.87339	1.91031	4.86054
C21orf15	4.18513	1.94309	2.98693	1.97415	3.96802	5.51602	3.49514	5.17843	2.83619	3.44434	5.12961	3.31415	1.91747	4.36154	4.56339	4.86794	4.87584	4.18284	5.02563	1.96301	2.02528	2.09185	4.36611	4.51069	5.35909	4.49158	1.99235	3.02487	4.66224	4.92911	5.37226	5.87755	1.97841	5.33808	4.16123	1.97323	3.29573	4.32138	4.15171	2.8303	4.51261	3.51752	5.36257	5.19051	4.95535	1.9512	3.24311	4.43573	5.18562
TCP11	5.36877	3.28928	4.64555	3.47352	5.17359	5.35793	4.58843	2.71364	5.38222	3.44434	3.78158	3.59428	3.32509	3.92061	4.89622	4.30479	4.45744	3.52413	5.49557	1.96301	3.66739	2.09185	1.93492	4.51069	3.97281	5.78845	4.02692	3.96569	2.87895	5.89427	5.22996	4.89527	5.80354	3.50842	3.31352	4.48753	4.55837	5.78733	3.13143	3.89549	5.85836	1.929	5.60941	3.30059	3.21438	5.73608	1.95233	3.78821	4.86054
UGT1A10	5.69271	1.94309	4.47389	6.69867	4.13434	6.22967	1.91018	5.47352	3.97183	6.08596	6.37562	4.44598	1.91747	5.34414	5.47642	5.85466	5.71829	4.91001	6.30641	4.97418	2.02528	2.09185	1.93492	4.02652	4.19305	5.66175	1.99235	5.13836	6.20188	6.37311	4.33165	4.04555	1.97841	6.26736	5.99541	4.83761	4.11656	5.30426	6.21822	1.95988	5.80561	1.929	5.29608	5.75103	5.97738	6.32487	5.76899	1.91031	5.49276
CLDN10	1.90756	1.94309	5.79535	1.97415	1.93233	4.7803	3.98008	5.38816	4.24492	4.05062	5.71392	5.80355	5.65293	5.43779	5.14727	4.95406	5.43446	5.96557	5.89625	3.62667	4.43383	2.09185	3.21979	3.59212	4.33944	1.94704	3.57471	5.51218	6.05198	4.93489	5.45038	2.00993	5.73233	6.22081	5.48136	6.04297	3.49781	5.65386	4.22256	5.49294	5.76457	3.5415	6.32074	6.04108	5.73021	4.68251	3.29181	3.80173	6.1643
C6orf218	4.96178	3.28928	4.602	3.47352	5.00117	5.33847	3.97022	1.91687	4.77074	5.35276	4.60814	3.31415	4.72189	1.89913	4.84797	1.88175	3.40036	3.52413	4.85284	3.04216	4.39818	4.50447	3.64332	4.35767	1.89017	5.36898	1.99235	4.63732	4.80309	4.98715	1.88593	5.098	4.78415	1.93815	2.86137	1.97323	3.92561	3.6726	2.71501	4.83432	5.57395	3.51752	4.69048	1.90476	4.49546	1.9512	2.81055	4.67809	4.47277
C2orf65	6.2054	1.94309	5.91748	4.31511	4.2717	6.07777	4.71753	5.17843	3.27328	3.1688	5.98823	4.44225	4.77609	4.80498	5.30588	5.79928	5.88034	5.70422	6.06866	5.22877	5.5771	2.09185	5.3655	5.56919	4.40689	5.91133	3.08578	3.77023	5.14307	3.89392	5.84484	6.07686	3.63064	4.34202	6.07576	4.77075	4.51706	6.08377	5.64364	5.50927	5.89504	4.34892	6.06773	4.91961	4.49546	1.9512	4.09827	4.76255	4.42237
IL1F6	3.618	4.6365	5.25115	3.01399	1.93233	6.05589	1.91018	4.33252	4.77074	5.47922	6.09883	5.68639	4.62482	5.5863	5.26932	5.87359	4.75736	5.83862	5.80512	6.3197	5.46411	2.09185	4.75462	1.90676	3.02964	5.49952	1.99235	5.30539	5.54888	6.14345	4.57048	2.00993	5.26553	4.2468	4.06248	5.5764	3.57604	5.8231	5.94237	4.89292	5.58957	3.05002	4.73398	4.70023	5.55224	5.18324	5.82896	5.2741	5.79324
ADCY10	4.55386	5.4897	3.73054	5.80821	4.0884	2.81296	3.49514	5.47854	4.46142	3.79783	3.78158	4.16509	1.91747	5.31231	1.9036	3.10641	5.52879	3.24469	4.50308	3.50591	3.66739	2.09185	4.83293	4.41428	5.06016	4.11812	1.99235	4.22956	1.91666	3.74168	5.61304	4.04224	3.82961	4.86198	4.16123	4.12249	4.81768	2.9381	4.94038	3.89549	2.93985	3.05002	4.9782	5.30174	3.21438	5.37556	5.01189	4.15945	2.84807
DDX43	5.75317	3.28928	4.75488	3.01399	5.6122	3.24255	4.53545	5.43056	3.73191	3.44434	5.8819	4.24944	4.25854	4.49176	5.49401	4.30479	4.14564	5.51864	5.84064	3.04216	2.02528	5.39928	4.25413	5.73592	5.07178	5.73286	3.83167	3.77023	5.78722	4.79996	5.77979	5.61212	5.61683	4.34202	3.85851	5.68189	3.92561	6.01968	4.89457	5.59869	4.14201	3.51752	2.00463	4.42747	5.57528	4.20942	5.6064	5.00309	5.20067
DIRAS2	1.90756	5.08707	4.36901	6.12636	1.93233	3.24255	3.77562	4.85252	5.09096	3.44434	3.58274	5.45519	3.95492	5.72349	5.01232	4.80726	4.98898	4.68308	1.9385	3.50591	4.39818	2.09185	5.6831	3.28494	5.27021	5.02637	1.99235	3.02487	4.7523	3.26321	5.3214	2.00993	3.82961	3.78903	5.37557	3.97446	4.04609	4.32138	5.35116	3.26485	2.93985	4.25416	4.01569	6.15148	3.69169	5.68431	4.38278	3.78821	3.57564
CDH12	6.09621	1.94309	5.59459	3.95132	5.62422	3.87261	3.49514	4.3807	5.0198	3.79783	5.3055	3.94441	3.32509	3.72499	4.97752	5.87094	3.87835	4.96818	2.83132	3.50591	2.02528	4.05762	1.93492	5.38855	3.77894	5.80267	1.99235	4.32529	4.90754	3.54254	3.89542	3.10119	4.20263	4.13066	5.78022	4.12249	2.84719	4.13991	2.71501	5.4723	4.02267	1.929	5.2093	4.93608	3.69169	1.9512	2.81055	4.05996	1.90037
PCDH20	5.31214	1.94309	3.73054	5.95741	1.93233	2.81296	4.11644	6.0862	4.50808	4.45773	4.64329	3.94441	3.60551	5.48853	1.9036	5.52334	4.2718	5.26564	5.2632	1.96301	4.13978	2.09185	3.64332	4.92589	2.62465	4.58669	3.08578	5.30539	5.30564	4.53581	5.36549	2.00993	3.63064	4.2468	5.65509	1.97323	4.30188	4.39294	2.71501	3.54301	5.2617	4.34892	4.01569	5.343	5.18882	4.32348	3.52065	2.86145	4.69518
LHX9	5.97936	4.04178	3.73054	3.75463	3.81697	5.65683	4.47548	5.59544	3.27328	5.17272	4.05421	1.92734	4.77609	2.98019	5.55271	3.10641	3.12583	3.24469	1.9385	3.04216	2.02528	2.09185	3.92144	3.28494	4.93635	5.83072	4.1739	4.75595	3.95832	2.822	3.14209	4.75628	6.10446	1.93815	3.79225	3.97446	4.36524	4.02043	3.13143	1.95988	5.76136	3.99251	5.87412	3.93078	5.07177	3.59256	4.74718	4.05996	4.30254
SLN	4.55386	4.3657	5.75423	4.46744	5.29373	4.91388	6.27845	5.02713	6.54243	5.29038	1.92328	4.58003	5.3523	5.33729	1.9036	4.80726	2.70643	5.4032	2.83132	3.04216	4.13978	2.09185	4.45767	6.24484	4.05025	5.10525	6.21364	3.48943	3.60908	4.27495	4.83479	5.11504	3.82961	3.04222	2.86137	1.97323	4.55837	4.64607	4.15171	3.26485	3.67499	1.929	4.28053	5.10152	6.17018	6.63315	5.5996	3.30932	1.90037
GREB1L	6.083	4.04178	4.36901	3.01399	4.90009	2.81296	5.28101	5.60932	5.51029	5.82363	3.30279	3.31415	4.50041	1.89913	3.46539	3.85914	4.56103	5.33104	2.83132	3.50591	2.02528	2.09185	5.04658	5.51491	3.6535	3.64917	4.38593	3.77023	5.58636	4.01564	5.40982	3.10119	3.35091	3.04222	5.61236	4.5486	5.82392	3.39172	5.42554	5.26902	3.67499	5.14198	3.07584	5.53176	3.96772	4.72029	4.09827	4.15945	5.19332
NETO1	5.30643	5.84106	3.73054	3.01399	1.93233	4.7977	3.77562	3.98932	3.27328	3.1688	4.60814	3.59428	5.3523	3.44411	3	4.89507	3.40036	3.52413	3.54873	4.55397	2.02528	2.09185	5.62166	5.3761	4.32756	4.21709	4.38593	5.03987	1.91666	4.8414	3.89542	4.61172	1.97841	3.04222	3.31352	1.97323	1.89203	3.6726	4.97686	4.01819	4.14201	3.05002	3.07584	3.77951	4.63551	3.59256	4.60029	5.20562	3.92554
THEG	4.63238	1.94309	5.66349	1.97415	4.88033	5.33847	5.28101	1.91687	4.83881	5.36074	4.8314	1.92734	4.77609	4.36154	3.74614	4.73563	4.49461	3.72323	3.74808	3.50591	5.04953	5.55461	1.93492	4.41428	4.11834	4.99576	3.08578	3.77023	2.87895	4.53581	1.88593	4.83152	2.90638	1.93815	4.37931	3.97446	5.6319	5.1635	4.33188	5.00291	4.56215	3.51752	3.07584	4.3712	3.96772	1.9512	3.52065	1.91031	3.57564
MUC13	4.59484	4.47396	5.42375	4.31511	2.88928	4.09811	3.77562	5.64571	3.75112	4.1879	5.32198	5.6923	3.32509	6.13024	3.94133	4.3966	4.56103	5.76343	5.07279	3.78684	3.66739	4.325	3.16844	4.65831	4.05025	4.11812	3.55091	5.77881	6.14621	5.88224	4.99207	4.40142	4.48094	1.93815	5.41133	5.89238	5.52278	5.5994	3.60463	4.83432	4.32329	5.16672	5.80793	5.76322	5.42637	3.87218	3.87339	3.93938	5.56649
DMBX1	4.08637	5.25709	4.07439	4.75294	5.20799	1.9685	5.21068	5.15165	5.0198	5.68929	1.92328	4.95244	4.80074	4.59347	5.04408	5.50034	4.90402	5.09196	3.26987	3.98257	2.02528	4.63693	5.16623	5.25236	4.5616	3.99806	5.62792	3.02487	3.60908	2.822	3.14209	2.00993	2.90638	5.41808	5.30431	5.10466	5.60585	3.6726	5.67319	5.38941	2.93985	4.13858	3.53889	4.93608	3.21438	3.87218	3.87339	4.05996	1.90037
UMODL1	5.0466	4.04178	2.98693	3.47352	1.93233	2.81296	3.02787	5.17195	4.93165	2.74558	4.37535	5.19161	3.32509	5.8161	3	3.85914	5.5873	4.68308	4.0227	5.13463	4.87504	2.09185	5.29607	3.28494	5.50502	1.94704	1.99235	4.47524	3.63176	4.57767	5.35857	3.10119	1.97841	4.2468	5.453	1.97323	4.55837	2.9381	5.16297	1.95988	3.39408	4.93993	2.00463	4.60275	4.29564	3.12125	4.52478	3.58965	3.77426
MUCL1	2.88546	6.15735	5.02389	4.71628	6.31183	1.9685	5.75965	5.58413	5.95631	4.65807	1.92328	3.94441	5.97372	5.09809	5.69941	5.16092	5.29811	4.80231	1.9385	4.9191	6.72659	5.80295	5.76143	5.92851	3.77894	4.49158	4.02692	6.01573	6.33528	3.74168	5.62128	2.00993	4.48094	3.98401	5.45938	4.41758	5.79188	4.02043	5.05023	5.5471	3.87268	4.91676	3.07584	4.67012	5.39875	5.54594	3.99637	4.57293	5.52695
BHMT	4.34041	3.28928	4.55375	4.8995	4.78959	4.32554	3.49514	5.49042	4.58946	4.68423	1.92328	3.94441	3.60551	1.89913	5.3323	5.00724	4.06954	5.36121	3.26987	3.50591	2.02528	2.09185	5.08512	5.34487	4.71518	5.05463	3.08578	3.96569	3.60908	3.26321	5.53191	4.04224	4.42429	3.78903	5.87735	4.60266	4.91223	4.96027	1.93243	1.95988	4.83392	4.25416	4.87398	5.08054	3.21438	5.41594	4.18462	2.86145	1.90037
SLC30A10	4.18513	3.76773	2.98693	3.47352	4.51373	3.51959	3.02787	4.50198	1.95319	5.36465	1.92328	4.68564	4.39411	1.89913	3.46539	4.64881	4.8609	4.18284	2.83132	1.96301	4.6964	2.09185	3.92144	5.35864	3.49879	4.97946	1.99235	3.48943	1.91666	4.01564	4.76395	5.31286	3.98136	1.93815	3.94271	1.97323	4.95946	4.02043	2.71501	1.95988	1.94433	3.99251	4.52748	3.77951	1.91913	3.12125	3.72024	3.30932	5.07564
DEFB4A	3.33731	4.47396	5.607	4.1	3.3381	3.24255	1.91018	4.72324	5.5833	5.17272	5.0776	3.79302	6.39904	5.64988	5.56138	6.11608	4.59098	6.03264	5.18525	6.00276	6.59999	6.2303	5.46948	5.12182	3.6535	6.05217	4.77978	5.9973	6.32148	5.73706	3.89542	2.00993	4.65761	4.2468	4.24464	5.94587	5.67017	5.93567	5.49917	5.48517	4.75095	1.929	5.06027	4.88442	5.54797	1.9512	4.81595	6.18068	5.26799
SCN4A	3.618	5.5747	5.0075	4.39697	4.63822	3.51959	6.1411	5.1972	6.13531	5.19985	3.30279	1.92734	4.72189	5.15568	5.77351	5.41157	5.42451	5.16815	3.90057	5.19646	3.66739	2.09185	4.97983	6.04418	3.88359	3.36863	5.57377	3.48943	2.87895	4.33927	5.42692	2.00993	2.90638	3.04222	4.43501	1.97323	5.2192	3.87038	4.33188	1.95988	3.39408	4.25416	2.00463	4.90241	6.04056	6.32604	4.94183	5.22773	4.66505
LRP1B	5.41236	4.6365	3.44953	5.79894	2.88928	3.71919	5.2888	5.63369	4.46142	3.44434	3.58274	3.79302	3.60551	4.97985	5.2098	5.34396	4.61898	4.18284	5.14274	4.89408	2.02528	3.57965	5.76324	5.3675	5.86419	4.21709	5.83088	1.93755	4.97456	4.01564	5.54667	5.45997	1.97841	1.93815	5.70305	4.23987	4.51706	5.41111	4.38028	2.8303	4.7805	5.4238	4.16341	6.00565	4.89619	5.74937	4.4819	3.78821	4.04624
CBLN2	5.95171	4.47396	3.73054	1.97415	4.0884	1.9685	5.34498	4.42459	4.77074	1.93246	4.8724	2.8677	4.92326	4.99697	4.97752	5.13522	2.70643	4.92555	5.42648	1.96301	3.66739	2.09185	5.02567	4.22093	5.86668	3.36863	3.08578	3.77023	5.14307	3.74168	4.62763	2.00993	1.97841	5.97979	3.94271	3.03522	3.29573	2.9381	4.42444	5.59354	1.94433	5.52138	4.01569	1.90476	4.7417	1.9512	4.09827	4.83259	5.84685
MMP27	4.50883	3.76773	4.28787	3.47352	1.93233	1.9685	1.91018	5.10701	3.27328	1.93246	5.19129	3.94441	2.87605	3.72499	5.05896	4.59777	3.12583	5.24239	4.28311	4.12998	2.02528	2.09185	3.16844	2.83973	5.42042	4.11812	1.99235	5.30539	4.84823	4.11626	3.89542	3.56604	4.48094	4.2468	5.25189	1.97323	2.84719	4.68341	3.40523	3.74254	4.24029	1.929	3.53889	4.82478	3.69169	1.9512	2.81055	2.86145	2.84807
PLA2G2F	3.618	5.10839	5.86233	3.01399	5.86505	3.24255	5.04994	3.13336	5.168	5.37978	3.78158	3.79302	5.86889	4.97985	5.1484	5.77348	4.14564	4.68308	1.9385	3.50591	6.19486	5.83435	4.92758	5.34954	1.89017	4.70009	4.53565	6.12457	5.89082	3.89392	3.89542	2.00993	4.42429	5.72564	4.92134	5.86226	5.80604	4.77921	4.8042	5.36219	4.24029	4.49728	2.00463	3.77951	5.1269	4.67375	4.63382	5.39076	5.47476
MUC2	4.80697	3.76773	4.9723	3.01399	2.88928	6.18717	3.97022	5.37115	4.55051	3.64387	6.49807	5.1184	4.1746	5.98465	4.30003	4.3966	3.40036	4.47496	6.50849	3.98257	4.13978	2.09185	3.16844	5.53745	6.00737	5.70141	3.08578	5.0228	5.46428	5.93307	1.88593	6.05949	4.61935	3.50842	4.31651	4.33629	5.27638	4.96027	2.71501	4.01819	3.67499	5.02047	5.26522	3.93078	3.69169	1.9512	4.09827	1.91031	4.63268
FOXG1	4.34041	5.35885	2.98693	5.6193	5.13525	3.99593	3.49514	5.54888	5.60044	4.56877	3.30279	3.59428	4.95678	5.23112	1.9036	5.13522	1.91133	5.09196	4.28311	4.4237	2.02528	2.09185	1.93492	5.45058	3.30008	5.65014	5.51596	4.92334	4.62745	4.20142	5.11687	4.40142	4.20263	3.50842	4.84832	1.97323	5.71785	1.9462	1.93243	4.83432	3.39408	1.929	4.69048	4.3712	5.45162	3.59256	1.95233	4.15945	4.04624
BEST2	6.19012	5.08707	4.72147	3.01399	5.16441	4.84022	3.77562	5.35311	5.05713	4.7089	4.31152	4.61807	2.87605	4.63686	1.9036	4.3966	5.27556	2.80323	4.12367	3.04216	5.65786	6.0966	3.64332	3.56486	4.96666	2.91775	4.69736	5.0228	3.32862	3.54254	5.40982	2.00993	3.98136	5.30856	5.14791	3.97446	3.92561	2.9381	2.71501	2.8303	5.89282	5.62346	5.72611	3.93078	3.21438	1.9512	3.24311	1.91031	5.37869
TRHDE	3.33731	4.04178	3.92657	3.47352	4.92147	2.81296	5.28165	3.60751	5.23951	5.43774	3.58274	3.79302	5.18563	2.98019	1.9036	4.1925	1.91133	3.24469	4.82134	3.50937	3.66739	3.57965	1.93492	5.40891	2.62465	4.52955	3.55091	5.22472	3.95832	4.72373	3.89542	3.10119	3.98136	3.50842	4.06248	3.70546	1.89203	3.87038	4.62624	5.98265	3.39408	5.66349	3.07584	3.77951	4.7862	4.2763	3.24311	5.27922	5.67607
B3GALT5	5.50504	5.32844	3.73054	1.97415	1.93233	1.9685	4.11644	5.66092	4.83881	4.02474	4.92681	4.38583	4.07535	4.49176	4.95879	5.41701	5.46947	5.65164	6.1079	5.98637	2.02528	2.09185	4.11194	3.56486	5.74309	3.84738	3.08578	4.63732	5.46084	6.07894	4.83479	3.56604	4.92248	5.45842	4.75841	4.12249	3.57604	3.87038	5.85987	3.54301	4.14201	5.63106	2.00463	4.70023	3.21438	1.9512	1.95233	1.91031	5.29688
SERPINA9	2.88546	5.5747	1.91915	1.97415	4.4635	1.9685	4.11644	1.91687	4.21328	2.74558	3.30279	2.8677	2.87605	1.89913	3.46539	4.04994	3.59982	4.18284	2.83132	4.55397	4.87504	5.25516	4.70912	5.11228	4.2333	1.94704	1.99235	4.22956	4.62745	4.39636	4.22638	2.00993	4.57758	4.77019	5.30963	1.97323	4.47164	1.9462	3.13143	4.54455	3.39408	3.05002	2.00463	3.58093	3.69169	3.12125	5.02444	5.48364	5.84478
LMOD3	2.88546	3.76773	5.33721	4.1	5.17359	4.8195	6.26244	3.76174	6.30978	3.79783	3.78158	3.59428	5.08973	3.44411	4.30003	4.3966	3.75402	5.05178	4.94113	1.96301	4.13978	2.09185	3.16844	6.14414	3.97281	4.88548	6.00377	3.02487	3.95832	4.79996	3.61807	2.00993	2.90638	3.50842	3.31352	3.77828	4.14547	2.9381	3.75895	2.8303	3.39408	3.05002	4.01569	4.60275	6.13714	6.47772	5.56801	3.58965	3.57564
SEMA3E	5.62771	3.28928	4.55375	4.39697	2.88928	3.71919	4.2321	4.99596	4.02626	4.3133	5.0166	5.67413	4.72189	5.79224	3.94133	5.22774	3.40036	5.24836	4.45659	1.96301	3.66739	3.57965	4.70912	5.23278	4.05025	3.36863	3.08578	3.96569	5.30564	4.11626	5.2603	5.69721	4.97704	5.4014	3.59417	3.4973	5.27051	4.13991	1.93243	4.65311	4.32329	5.10117	2.00463	5.47653	4.7862	3.87218	1.95233	2.86145	4.7233
TCL1A	3.618	3.76773	5.46725	4.21806	3.61849	2.81296	5.04994	3.13336	3.90389	3.64387	5.53206	3.94441	5.50406	5.09809	1.9036	5.10739	5.04886	5.35708	3.26987	4.80795	5.25779	4.05762	4.53461	4.22093	4.63416	4.21709	3.55091	3.48943	3.80745	5.33631	5.73974	2.00993	1.97841	5.15258	5.59765	4.48753	4.36524	4.02043	3.13143	5.49139	3.39408	5.35924	3.81979	4.93608	4.95535	1.9512	5.60355	6.35043	6.14186
TCERG1L	3.618	3.76773	4.64555	3.47352	2.88928	1.9685	5.2389	3.40816	4.21328	5.85422	5.55461	2.8677	5.36682	5.0289	3.74614	4.47376	3.98165	3.87538	4.78858	1.96301	2.02528	4.50447	4.11194	4.97161	5.49039	3.99806	3.08578	5.31292	4.6944	5.49443	1.88593	2.00993	4.10254	3.04222	5.69027	5.0896	1.89203	3.6726	3.88357	3.26485	4.88115	4.96174	3.07584	3.30059	4.63551	3.12125	3.24311	3.78821	4.1458
ZAN	5.22833	3.76773	5.22545	1.97415	5.68287	5.61553	3.02787	3.98932	4.12747	2.74558	5.88865	4.24944	5.47294	4.43104	1.9036	1.88175	4.14564	3.24469	4.12367	3.50591	5.51462	2.09185	1.93492	2.83973	4.11834	5.95529	4.77978	5.51571	5.69701	5.03729	3.61807	5.38766	5.6227	1.93815	2.86137	5.69231	4.36524	5.24539	3.60463	5.07684	5.74249	1.929	4.16341	4.05141	5.48036	4.67375	4.38278	5.25503	4.5977
PAEP	3.618	3.28928	5.7224	1.97415	5.10341	3.24255	5.09427	3.13336	5.15924	4.96696	4.15409	4.38583	6.01873	4.90233	4.30003	4.04994	2.70643	1.89419	2.83132	1.96301	5.93225	2.09185	4.25413	5.53745	3.88359	3.99806	5.25698	5.39112	5.63424	3.26321	3.14209	4.61172	3.35091	3.50842	4.37931	4.48753	5.6319	4.23828	4.2784	5.59779	4.68483	1.929	3.07584	4.63772	5.09114	3.59256	4.25929	4.76255	3.29543
VAX1	5.6314	5.36836	4.28787	3.95132	4.51373	1.9685	4.8708	4.53638	3.55175	5.20631	3.58274	1.92734	4.45018	4.77636	4.44962	5.31498	5.623	5.44607	1.9385	3.78684	5.09368	3.57965	4.65821	4.85495	3.30008	3.64917	3.83167	5.55414	1.91666	3.74168	5.27904	2.00993	4.57758	3.78903	5.49492	4.65104	5.01424	4.02043	4.53684	5.05381	4.02267	5.63602	5.54224	5.4914	4.15578	4.41686	4.43482	2.86145	5.59709
IGFN1	5.96489	4.22772	5.53188	3.95132	5.3236	3.51959	5.25642	3.13336	5.8848	4.83261	4.37535	1.92734	4.97249	2.98019	3.46539	5.40039	2.70643	4.18284	4.20921	1.96301	5.67152	5.48653	3.92144	5.54458	4.6766	5.06796	4.74051	5.21871	5.51123	3.74168	3.89542	4.40142	1.97841	3.50842	4.06248	4.41758	5.53017	2.9381	4.07537	4.97455	5.02744	1.929	4.84313	3.30059	5.45162	5.66953	4.9569	4.43573	2.84807
DEFB103B	3.81606	5.56541	6.34051	3.95132	4.40736	3.71919	1.91018	4.3807	5.4601	4.7089	5.26964	3.59428	6.12308	4.77636	5.4976	5.94239	4.49461	5.7679	2.83132	5.79642	6.56712	6.26482	5.83039	5.97899	2.62465	6.01004	4.38593	6.28202	6.15915	4.20142	3.61807	2.00993	6.12365	1.93815	4.73239	5.38148	5.31461	5.30421	5.42254	5.59568	5.47518	1.929	5.51115	5.44421	5.65294	3.87218	5.01189	4.95949	5.68175
RFPL1	3.48307	4.08629	1.91915	4.26298	4.10027	2.10469	4.90978	4.3156	3.03944	3.82598	1.92328	2.83761	4.57218	4.98784	2.70765	1.88175	4.03168	4.04559	1.9385	3.78684	2.02528	5.05547	3.88911	3.15128	4.13469	4.81419	1.99235	5.46449	3.47139	1.91419	4.53628	2.00993	2.71705	3.21363	3.49215	3.28194	3.82386	2.67007	4.41595	1.95988	4.74197	4.06138	3.49971	4.69874	1.91913	1.99524	4.36034	5.27441	1.90037
DMRTA2	6.10704	3.28928	5.70648	6.1276	4.5591	5.65008	3.49514	5.93785	1.95319	4.1879	5.86013	5.72765	1.91747	5.48493	5.84215	1.88175	3.98165	5.48335	5.91118	4.24687	2.02528	4.325	3.16844	5.02489	4.32756	3.64917	4.1739	3.02487	5.18772	5.6391	5.71316	6.02887	5.27296	5.85897	4.31651	4.83523	5.15815	6.08469	5.70615	3.54301	5.84685	1.929	6.25062	2.85306	5.37617	4.89726	5.39493	1.91031	4.30254
WDR38	3.81606	3.28928	4.28787	1.97415	3.3381	4.7245	4.58843	4.67748	3.27328	2.74558	3.78158	4.24944	2.87605	5.47763	3.74614	3.10641	2.70643	3.24469	4.68374	3.04216	2.02528	2.09185	1.93492	3.28494	4.40689	4.84052	1.99235	3.02487	5.317	5.43287	3.89542	4.04224	4.10254	3.78903	3.79225	1.97323	4.6311	5.11959	3.40523	4.28019	1.94433	3.05002	2.00463	5.45758	1.91913	3.12125	2.81055	3.93938	5.19332
ACER1	1.90756	5.5881	5.45906	3.75463	4.34408	5.24589	4.81626	1.91687	2.83619	1.93246	4.67585	1.92734	5.14123	3.72499	4.3805	4.98736	5.20231	4.18284	3.26987	4.49323	4.57012	2.09185	5.48542	4.03637	3.49879	4.11812	1.99235	6.20151	2.87895	2.822	4.22638	2.00993	4.83563	3.98401	4.64285	3.4973	4.04609	3.6726	5.21976	3.89549	5.24598	3.79801	3.07584	4.52342	3.21438	4.32348	4.56407	4.48606	4.94686
ART3	3.81606	1.94309	4.55375	1.97415	5.14524	3.24255	5.3251	1.91687	5.38663	3.64387	3.30279	3.79302	4.95678	1.89913	4.2046	1.88175	1.91133	3.52413	5.16038	3.04216	5.16865	2.09185	1.93492	5.17397	3.02964	1.94704	5.80598	4.11291	4.6944	1.91419	3.61807	3.8469	2.90638	4.42223	2.86137	4.5486	3.92561	3.6726	3.98721	3.54301	3.39408	4.89214	4.73398	2.85306	5.22874	5.5727	4.72151	4.57293	2.84807
LOC284233	4.08637	3.28928	4.55375	1.97415	3.61849	5.10725	1.91018	4.50198	2.83619	3.1688	4.48257	2.8677	3.32509	4.43104	4.08826	4.83877	3.75402	3.24469	4.58416	1.96301	4.13978	2.09185	3.64332	3.91532	4.6766	2.91775	1.99235	1.93755	5.06874	4.60987	5.208	5.30339	2.90638	4.80316	4.73239	1.97323	2.84719	4.02043	3.60463	2.8303	4.02267	3.05002	5.27536	4.15098	4.7862	3.12125	3.99637	4.48606	5.0966
SP8	5.45382	1.94309	4.55375	4.58348	4.18777	3.87261	5.17978	5.35681	3.27328	5.37607	2.8573	1.92734	4.50041	5.0289	3.46539	3.85914	5.4996	5.32185	3.74808	5.19646	2.02528	2.09185	4.79564	1.90676	4.53449	4.21709	4.81569	4.7891	3.60908	3.74168	5.45833	2.00993	3.63064	1.93815	5.36262	5.73541	4.66341	3.6726	4.59914	4.20586	4.75095	3.51752	4.64224	5.08054	4.95535	3.59256	2.81055	2.86145	3.29543
NRXN1	4.26854	4.3657	1.91915	4.46744	3.3381	1.9685	1.91018	5.7304	4.83881	3.64387	4.7061	4.24944	3.32509	3.92061	4.2046	5.02602	5.53466	4.98138	5.61308	4.34285	2.02528	2.09185	4.60063	5.83445	5.96334	1.94704	3.08578	4.75595	5.12342	3.74168	4.67812	2.00993	2.90638	5.61096	5.09082	3.03522	3.29573	2.9381	4.07537	3.89549	2.93985	3.05002	5.04137	4.7283	3.21438	5.16989	4.56407	4.83259	4.47277
C11orf87	3.33731	5.68841	4.07439	5.86167	5.12497	2.81296	4.81626	5.13006	4.91474	3.92182	5.94792	3.79302	5.01592	5.08531	5.04408	4.1925	3.59982	5.54127	4.0227	3.98257	4.79493	4.89561	5.97458	4.65831	5.55527	3.36863	3.08578	4.75595	5.62685	2.822	4.67812	2.00993	2.90638	3.78903	5.73014	1.97323	5.23282	3.39172	5.38384	1.95988	5.89724	4.34892	2.00463	5.62928	4.15578	6.14836	2.81055	4.05996	3.77426
CAPN8	3.33731	3.28928	5.18765	3.95132	3.61849	4.38393	3.49514	5.14461	4.12747	1.93246	5.05444	3.94441	3.32509	4.88017	4.72938	4.64881	4.59098	5.6031	4.58416	4.4237	2.02528	2.09185	3.64332	2.83973	4.36883	1.94704	1.99235	4.89991	5.82408	4.01564	4.42858	3.10119	5.32071	4.42223	4.16123	4.12249	5.00129	5.21143	2.71501	5.3051	5.01197	4.80738	4.16341	5.59005	5.20267	4.41686	3.24311	2.86145	4.42237
SLC10A4	5.36402	5.01416	3.44953	4.67623	3.81697	5.32824	3.49514	5.15165	5.168	5.80781	3.30279	3.79302	4.65965	4.54543	5.38448	4.3966	5.23042	4.98138	3.90057	1.96301	2.02528	2.09185	5.16623	5.54221	3.30008	4.3007	3.08578	3.96569	3.60908	3.54254	5.2603	5.02074	5.473	3.04222	5.18897	5.0896	3.77455	5.34212	4.74616	3.54301	5.23782	1.929	5.2093	5.24768	1.91913	4.86748	4.85618	3.93938	5.29131
TMSB4Y	1.90756	1.94309	2.98693	1.97415	3.81697	6.03178	4.63587	1.91687	5.08004	3.1688	4.48257	5.72381	4.45018	5.56021	5.47129	1.88175	5.36792	1.89419	5.29895	1.96301	2.02528	4.74055	1.93492	5.25864	5.62617	3.64917	4.1739	3.02487	5.57747	4.4475	4.76395	3.10119	5.61112	4.49121	2.86137	4.23987	5.29878	4.77921	5.66074	5.18219	4.24029	5.57258	2.00463	4.86553	5.07177	4.20942	1.95233	5.22773	5.27399
EPHA8	4.40331	3.28928	4.36901	4.1	5.52097	4.60258	4.11644	3.13336	1.95319	5.38709	5.02966	3.31415	4.77609	4.18488	3.46539	3.85914	2.70643	2.80323	3.26987	3.04216	5.09368	2.09185	1.93492	5.35413	3.77894	5.20673	1.99235	1.93755	5.27522	3.74168	4.57048	4.86464	5.70249	3.50842	1.88259	3.03522	5.34394	4.64607	3.60463	1.95988	3.67499	4.34892	4.73398	2.85306	4.15578	3.12125	1.95233	3.58965	2.84807
TMPRSS11BNL	4.63238	5.19892	4.81454	3.75463	1.93233	6.26837	1.91018	3.13336	4.28736	1.93246	5.55938	2.8677	1.91747	4.77636	5.26146	5.42232	4.89018	5.19715	5.44447	5.31025	4.87504	2.09185	4.79564	1.90676	4.2333	5.27038	1.99235	3.02487	5.26219	5.678	5.18444	3.56604	5.37851	3.50842	4.24464	3.77828	2.84719	4.90166	5.3058	1.95988	5.59457	4.49728	4.90272	5.13074	4.57086	3.12125	5.20478	1.91031	5.29688
TLX2	4.83002	3.76773	1.91915	4.84698	5.09212	4.43625	3.02787	3.13336	1.95319	5.39771	4.23867	3.31415	4.39411	4.71236	4.91824	4.04994	4.2718	4.32061	1.9385	4.9191	4.6964	5.09707	3.16844	5.1401	3.6535	4.11812	1.99235	3.77023	1.91666	1.91419	5.39164	4.18931	2.90638	1.93815	3.94271	3.03522	5.07272	5.64835	4.21878	3.26485	5.3868	3.99251	4.01569	4.3077	3.69169	1.9512	2.81055	3.30932	3.29543
ALK	2.88546	4.80433	2.98693	4.39697	3.61849	3.87261	4.8708	3.88603	3.90389	1.93246	1.92328	4.74402	4.1746	5.13381	5.43786	4.9204	5.60125	5.61978	3.26987	4.4237	2.02528	4.325	5.29607	3.56486	4.32756	2.91775	3.08578	3.77023	4.07861	2.822	4.08505	2.00993	4.53172	3.78903	5.13903	1.97323	4.51706	2.9381	4.85497	2.8303	1.94433	5.34587	3.07584	3.77951	1.91913	4.06497	3.52065	4.24356	1.90037
STXBP5L	4.18513	5.44261	3.44953	4.81793	3.61849	3.24255	1.91018	5.09899	3.27328	3.64387	4.23867	4.65317	3.80398	4.80498	3.46539	3.58086	3.12583	4.51703	3.74808	4.83875	4.13978	2.09185	4.83293	2.83973	4.89169	1.94704	1.99235	4.40592	4.62745	4.01564	5.06871	3.56604	4.92248	3.04222	4.57081	3.77828	4.87713	1.9462	5.183	3.74254	2.93985	3.51752	3.07584	5.45097	3.96772	3.12125	2.81055	3.78821	2.84807
SGCG	5.41637	1.94309	4.49978	5.07449	4.51373	3.71919	5.78949	5.33393	6.04288	4.53459	1.92328	2.8677	4.62482	5.32504	4.3805	4.9204	4.8609	4.87743	4.34776	4.12998	2.02528	4.05762	3.92144	5.71329	4.5871	3.64917	5.37872	5.10098	4.07861	3.26321	5.35857	2.00993	1.97841	4.93656	5.27628	3.97446	3.29573	2.9381	3.88357	1.95988	4.14201	3.05002	3.53889	4.63772	5.74194	6.18182	4.87487	3.78821	4.30254
TDRD1	6.09942	1.94309	4.72147	3.01399	1.93233	2.81296	4.2321	4.65265	2.83619	2.74558	1.92328	3.59428	4.72189	3.72499	3.46539	6.05145	4.59098	4.55557	6.26966	4.24687	2.02528	4.05762	3.64332	4.03637	3.88359	6.11241	1.99235	1.93755	3.95832	6.06893	4.72322	6.37282	2.90638	4.13066	5.04673	3.03522	3.57604	1.9462	3.13143	1.95988	6.21215	1.929	6.36907	3.58093	3.69169	3.59256	3.52065	4.31603	4.1458
PLEKHG7	3.33731	3.76773	4.07439	5.02468	3.96802	2.81296	1.91018	4.91109	1.95319	3.1688	4.56999	3.59428	1.91747	5.49556	3.74614	4.83877	3.40036	4.7098	5.58067	3.78684	5.30642	3.57965	3.16844	3.56486	4.47504	3.84738	1.99235	4.71991	5.74831	5.12039	4.62763	3.10119	1.97841	5.20969	4.80589	5.24785	4.6311	4.68341	2.71501	3.54301	1.94433	5.10117	4.01569	5.13996	5.10946	3.87218	4.43482	5.19002	5.26188
SLITRK5	5.9484	3.28928	4.89012	4.8995	1.93233	3.51959	1.91018	4.701	3.27328	4.65807	5.16621	5.26502	3.32509	4.63686	5.25342	4.83877	5.64047	5.64878	5.31543	3.98257	3.66739	2.09185	1.93492	5.47267	3.77894	4.58669	3.08578	4.22956	5.59918	4.64276	5.21918	3.56604	4.61935	3.50842	4.80589	3.03522	2.84719	4.13991	4.53684	4.83432	4.32329	4.55717	5.19691	5.46721	4.40564	3.12125	3.24311	1.91031	5.08626
C1orf68	2.88546	4.04178	4.95337	1.97415	5.58335	1.9685	3.02787	3.13336	4.40984	5.10232	2.8573	1.92734	5.39393	3.44411	4.91824	5.47957	4.41717	4.85995	1.9385	3.50591	5.28299	5.16865	4.45767	3.91532	3.49879	4.86363	3.83167	6.04585	4.5485	3.54254	4.33768	2.00993	3.35091	4.34202	2.86137	4.23987	4.4214	1.9462	5.06872	5.50047	5.01197	3.51752	4.01569	3.58093	4.86283	5.18324	4.63382	3.93938	4.04624
NEFM	4.26854	6.12214	4.55375	4.68414	6.11335	3.24255	4.67864	6.44836	6.60577	5.3312	3.58274	4.24944	6.36057	6.21741	5.44221	5.72308	4.93032	5.69047	5.28157	3.6324	5.16865	6.36708	6.08284	5.51491	5.77293	3.84738	5.80148	3.02487	4.5032	2.822	5.21918	5.07757	2.90638	4.34202	5.974	5.8808	5.76194	4.45549	5.73539	3.46749	6.25179	4.86367	2.00463	4.42747	5.32831	6.1556	5.94479	4.37048	5.03705
NKX2-5	4.75648	5.40365	4.95337	5.94034	1.93233	2.81296	4.71753	3.13336	1.95319	5.9102	4.48257	5.93944	5.53995	5.4204	5.02856	5.63559	5.49068	5.67086	1.9385	3.04216	5.51462	6.12196	5.64573	5.87715	3.97281	5.21541	3.55091	5.23799	3.32862	4.79996	5.52807	2.00993	5.28023	4.73441	5.84304	1.97323	5.98699	5.27613	5.16297	5.72927	1.94433	5.95281	2.00463	5.65088	5.17439	5.52076	5.47632	1.91031	2.84807
TUBA4B	4.83002	4.22772	5.59203	1.97415	4.4635	1.9685	3.49514	4.15321	3.55175	4.89808	5.38035	2.8677	1.91747	5.15568	1.9036	1.88175	2.70643	2.80323	4.28311	3.78684	3.66739	4.05762	4.97983	2.83973	2.62465	5.12808	3.08578	3.48943	5.54122	5.58147	3.14209	3.10119	4.28729	1.93815	3.94271	3.03522	4.55837	3.39172	2.71501	4.20586	4.39477	1.929	4.84313	5.19822	4.15578	1.9512	3.52065	4.76255	5.05333
SOX10	5.09371	4.22772	5.46317	3.01399	4.18777	4.63634	3.77562	5.34938	4.21328	4.11223	5.53206	1.92734	3.80398	4.88017	5.22795	5.22774	4.61898	5.71879	5.47746	4.60769	2.02528	2.09185	3.16844	3.28494	5.79481	3.84738	4.53565	4.22956	5.63787	4.27495	5.68333	2.00993	5.39395	3.50842	5.04673	3.03522	4.30188	5.56284	2.71501	5.50636	5.1204	4.55717	5.07827	5.96475	4.86283	3.59256	5.59152	3.58965	4.87944
KIRREL2	4.83002	4.04178	3.73054	3.01399	5.60776	2.81296	4.11644	1.91687	3.90389	5.94619	3.30279	4.53847	3.80398	2.98019	4.3805	5.52334	1.91133	5.16815	3.90057	3.04216	4.39818	2.09185	4.75462	4.81392	4.61128	4.43571	4.02692	3.02487	3.60908	3.74168	4.08505	2.00993	2.90638	5.18799	4.52986	4.33629	5.22608	3.6726	4.42444	3.26485	3.87268	4.83766	3.07584	2.85306	4.29564	3.12125	4.4819	4.97461	5.0966
C1orf125	4.7287	4.56236	1.91915	4.39697	2.88928	4.8195	3.02787	3.60751	4.77074	2.74558	5.19924	3.59428	3.32509	5.07203	4.95879	4.30479	4.06954	2.80323	5.48667	5.4547	5.56757	4.63693	3.92144	3.56486	3.88359	5.43933	1.99235	3.96569	4.2616	3.54254	5.24041	4.04224	5.3732	3.98401	4.80589	3.03522	3.77455	5.70806	4.50226	2.8303	5.21208	4.49728	3.53889	4.42747	5.14348	4.76226	5.0366	3.30932	3.92554
FCER2	4.08637	1.94309	3.44953	3.01399	1.93233	3.24255	3.77562	3.76174	2.83619	4.88271	4.98902	4.53847	4.39411	2.98019	3	5.06091	3.40036	3.72323	1.9385	4.94263	2.02528	2.09185	3.64332	3.76371	3.88359	3.36863	4.02692	4.22956	1.91666	5.14703	5.63701	2.00993	2.90638	4.42223	5.08033	1.97323	3.77455	3.87038	1.93243	5.45887	3.87268	4.34892	3.07584	4.70023	4.29564	3.12125	5.365	6.35946	6.01735
CDH4	5.49002	5.21445	5.66736	4.58348	5.71562	3.51959	5.66052	3.88603	5.76354	6.19842	5.72041	2.8677	5.85827	4.71236	5.69093	4.59777	5.43298	5.30748	3.74808	5.74736	5.51462	2.09185	4.95458	5.59758	5.86586	5.703	3.08578	1.93755	3.32862	4.27495	4.33768	3.8469	4.99362	3.04222	5.74105	1.97323	5.44219	3.87038	5.58094	3.26485	5.39693	4.77463	4.01569	4.23514	5.49628	5.38266	4.18462	4.67809	4.42237
FGF5	4.26854	5.29477	4.07439	4.1	4.63822	1.9685	4.96116	4.3807	4.02626	5.17272	2.8573	4.77044	4.82397	3.72499	4.44962	4.30479	3.12583	4.55557	3.54873	1.96301	3.66739	2.09185	4.45767	5.67223	5.02892	3.99806	4.53565	1.93755	5.68232	1.91419	3.14209	4.18931	2.90638	3.98401	2.86137	4.5486	5.02674	3.6726	5.26814	5.13821	3.39408	1.929	2.00463	2.85306	4.82633	3.12125	2.81055	3.58965	5.08626
SUN3	2.88546	4.47396	4.72147	1.97415	5.19972	4.93034	3.77562	3.40816	4.50808	5.55694	4.05421	2.8677	4.82397	3.72499	4.50999	4.3966	4.96659	4.18284	5.28747	3.50591	2.02528	5.25516	3.16844	4.22093	2.62465	5.49264	4.1739	1.93755	4.84823	3.54254	4.57048	5.56682	3.35091	1.93815	4.43501	4.23987	4.30188	5.72054	1.93243	6.07582	5.50759	1.929	4.58834	2.85306	5.26427	3.59256	1.95233	1.91031	3.29543
CTXN3	4.18513	1.94309	4.72147	4.8995	4.76336	3.24255	4.63587	3.13336	4.55051	1.93246	5.1484	3.94441	2.87605	3.44411	3.74614	1.88175	2.70643	3.72323	3.74808	1.96301	4.87504	5.13456	1.93492	2.83973	4.17888	5.22383	1.99235	5.07173	5.09164	1.91419	3.89542	2.00993	4.61935	3.78903	3.79225	1.97323	3.92561	1.9462	4.67883	3.26485	4.99584	3.05002	5.43092	3.30059	4.49546	1.9512	3.52065	4.15945	1.90037
GPR144	2.88546	4.04178	4.91236	3.47352	4.2717	5.06472	3.02787	3.13336	3.90389	3.1688	2.8573	3.31415	3.80398	2.98019	4.30003	4.47376	4.21245	1.89419	3.90057	1.96301	3.66739	5.16865	1.93492	3.76371	3.6535	4.99576	1.99235	3.96569	2.87895	4.53581	1.88593	4.97529	4.53172	1.93815	1.88259	3.97446	4.36524	5.22026	2.71501	2.8303	4.83392	3.05002	4.16341	3.30059	4.86283	4.86748	1.95233	3.93938	3.92554
HOXB13	5.94649	1.94309	4.36901	1.97415	5.93683	4.18486	5.33187	5.45846	5.64616	5.54051	1.92328	4.96823	2.87605	4.18488	5.71394	5.72858	5.77883	5.48067	4.81114	5.27654	5.4353	4.05762	5.64284	5.40048	5.75943	5.11684	3.08578	3.77023	1.91666	2.822	5.87197	2.00993	2.90638	6.19084	6.04562	5.34766	5.71312	4.02043	5.64364	3.26485	5.4162	5.97023	5.25474	3.58093	3.21438	5.59708	3.24311	4.37947	5.1613
LOC84740	6.2309	5.2588	6.3927	4.78833	6.40207	6.39426	3.97188	4.46639	6.20328	4.8677	6.38749	4.54021	6.40621	4.71339	5.74676	6.16153	4.49744	5.36644	6.27327	3.9842	5.23308	5.67729	4.53461	5.3164	4.63459	6.51273	4.38769	4.32788	4.26392	6.45015	4.86654	6.57694	6.20587	6.27222	5.33695	5.7633	5.88536	6.46771	4.60173	4.50367	6.35071	5.05611	6.52295	5.18325	5.45908	4.41686	4.43729	4.87467	6.19857
OLFM4	3.618	1.94309	6.04642	5.34188	3.61849	1.9685	4.75315	4.07721	5.88745	5.54677	5.43659	2.8677	5.26053	2.98019	6.41782	4.53998	4.06954	3.87538	4.71246	1.96301	5.23055	5.43107	1.93492	5.79099	4.47504	5.43933	3.55091	4.94546	4.5485	5.95443	4.22638	4.30583	3.82961	6.19727	4.24464	4.69469	5.66296	5.05566	4.56907	5.06552	5.63808	6.17763	3.81979	4.42747	4.15578	3.12125	3.24311	6.38878	4.47277
FGF17	4.40331	1.94309	3.73054	1.97415	3.3381	4.63634	1.91018	5.29155	1.95319	2.74558	1.92328	4.0653	1.91747	4.54543	4.65429	3.85914	3.59982	2.80323	4.71246	4.12998	4.13978	4.95615	3.16844	4.03637	5.49962	2.91775	3.08578	1.93755	3.95832	3.89392	4.83479	2.00993	4.72545	4.13066	4.43501	3.4973	4.66341	4.45549	2.71501	1.95988	3.87268	3.05002	4.37669	3.58093	1.91913	3.59256	2.81055	2.86145	3.29543
CAPN9	5.39993	3.76773	5.28252	1.97415	3.3381	4.7977	3.97022	4.67748	4.21328	3.64387	4.31152	1.92734	4.33085	5.36034	4.50999	5.17303	5.08385	5.07246	5.52075	3.50591	2.02528	2.09185	4.45767	2.83973	5.50679	4.43571	1.99235	4.32529	5.84423	4.57434	4.80091	3.10119	2.90638	3.04222	5.31485	4.33629	3.29573	5.67717	1.93243	4.40322	4.32329	5.47673	5.1841	5.11156	3.96772	3.59256	1.95233	2.86145	3.92554
SULT4A1	5.68991	4.88746	1.91915	5.02468	5.4734	2.81296	5.27304	3.88603	4.02626	6.0117	4.31152	4.44225	5.37614	3.72499	5.66748	5.44759	5.42166	4.92555	3.74808	3.78684	4.87504	6.05058	5.26547	5.41197	5.77162	4.88548	3.08578	3.02487	3.32862	5.17174	5.45333	2.00993	5.44041	1.93815	5.59765	5.13302	5.5512	4.45549	5.42254	3.26485	1.94433	5.61828	2.00463	4.82478	3.69169	3.59256	3.24311	5.14745	1.90037
ALX1	5.23565	4.6365	1.91915	5.59062	4.81427	4.87873	4.11644	5.7028	3.27328	4.60054	1.92328	5.80149	4.80074	5.22258	5.5779	5.41701	4.2718	4.55557	3.26987	5.66138	2.02528	2.09185	4.79564	4.81392	3.30008	5.28452	4.59609	3.02487	3.95832	2.822	4.72322	5.60829	4.57758	1.93815	3.94271	1.97323	3.57604	1.9462	4.21878	4.01819	4.90277	4.13858	5.54224	3.93078	1.91913	5.16989	5.0366	1.91031	4.81978
TSKS	5.26325	3.28928	5.76613	1.97415	6.32953	5.85222	5.5925	4.46486	5.40779	5.57244	5.57319	3.31415	5.84178	4.63686	5.11287	4.30479	3.59982	3.72323	5.9216	3.50591	2.02528	6.12839	4.45767	4.87393	3.88359	5.82882	3.55091	4.47524	4.98962	5.7189	5.11687	5.88718	5.69221	3.50842	4.48486	3.03522	5.51001	5.94114	3.13143	5.5759	5.54574	5.02047	5.5703	2.85306	5.71863	4.86748	3.99637	5.25503	4.36608
LOC100133545	5.12529	1.94309	5.26722	1.97415	1.93233	5.59538	1.91018	5.48573	4.21328	4.79533	5.7006	2.8677	1.91747	4.43104	4.56339	3.10641	2.70643	3.72323	5.94644	3.04216	2.02528	2.09185	3.64332	4.71687	5.03699	5.42653	1.99235	1.93755	3.32862	5.63256	4.62763	5.85568	4.48094	3.04222	4.93761	3.03522	4.51706	5.6679	3.13143	1.95988	5.19375	4.25416	3.81979	3.30059	4.57086	5.26421	3.99637	4.31603	3.57564
IP6K3	4.34041	3.76773	5.23423	3.75463	4.90009	5.04146	6.18462	5.23183	6.10987	4.3133	5.65224	4.79528	4.74987	5.34321	1.9036	4.3966	3.87835	4.09764	5.95854	1.96301	4.13978	2.09185	3.92144	5.8452	5.04488	4.3007	5.62792	1.93755	5.90892	5.51055	4.08505	5.02074	1.97841	4.42223	5.5337	5.07384	4.51706	4.85705	2.71501	1.95988	4.88115	4.80738	5.17076	5.23431	5.83052	6.29424	5.59358	1.91031	3.57564
FTCD	5.13521	3.28928	4.4388	3.01399	4.4635	3.24255	3.49514	4.33252	1.95319	2.74558	3.30279	4.32213	1.91747	4.49176	5.83847	1.88175	4.06954	5.15265	5.63327	3.50591	3.66739	2.09185	3.16844	4.65831	4.36883	3.64917	1.99235	3.48943	2.87895	2.822	4.50496	3.10119	3.98136	4.2468	3.59417	1.97323	5.21216	4.02043	3.60463	1.95988	3.87268	4.70021	4.16341	3.30059	1.91913	4.97491	2.81055	2.86145	1.90037
ZPLD1	4.34041	4.47396	3.44953	3.01399	3.81697	2.81296	5.2888	5.23724	3.75112	4.1879	4.15409	3.79302	4.07535	3.72499	1.9036	1.88175	1.91133	3.87538	2.83132	1.96301	2.02528	2.09185	4.60063	4.03637	4.53449	2.91775	4.02692	3.77023	5.33859	3.54254	3.89542	2.00993	3.82961	1.93815	1.88259	4.41758	4.04609	3.6726	4.07537	4.61971	3.87268	3.79801	2.00463	3.58093	3.96772	4.32348	3.99637	4.81057	2.84807
LOC146336	5.70401	5.08707	5.45906	1.97415	1.93233	4.91388	5.12097	2.71364	5.10158	4.3133	5.63858	4.44225	4.07535	5.34903	5.17015	4.47376	1.91133	4.73495	5.13357	5.02447	3.66739	2.09185	3.16844	5.48164	5.31445	4.97946	4.29036	1.93755	4.5032	5.42593	3.61807	3.10119	6.00745	1.93815	4.98246	3.03522	4.36524	5.48243	3.88357	2.8303	5.82596	4.61014	4.84313	5.64605	5.26427	5.26421	3.24311	1.91031	3.77426
LOC440356	5.66232	3.28928	4.64555	3.95132	3.3381	5.27776	1.91018	4.33252	4.02626	4.25433	4.43191	5.62218	1.91747	4.63686	5.29891	1.88175	4.2718	3.52413	4.99952	4.77472	2.02528	2.09185	3.16844	2.83973	3.77894	4.762	1.99235	3.02487	1.91666	4.95928	5.01283	5.26244	5.54144	4.6953	3.59417	4.60266	4.14547	3.39172	4.46495	1.95988	5.46744	3.05002	4.52748	1.90476	1.91913	4.20942	4.32473	2.86145	4.87944
SPOCK3	3.33731	6.05307	1.91915	5.02468	4.88033	1.9685	4.47548	5.80317	4.91474	4.1879	5.32198	6.48699	3.60551	5.17622	3.94133	4.3966	5.43019	5.00639	5.14274	3.04216	2.02528	2.09185	5.78887	5.18967	5.06016	3.99806	4.69736	4.22956	5.56356	4.57434	5.71687	5.098	4.10254	3.50842	5.81378	5.53388	4.04609	2.9381	5.40702	3.74254	1.94433	3.05002	2.00463	5.62753	5.25287	5.65388	3.99637	4.15945	5.77414
PNLIPRP3	3.33731	5.9637	5.99631	3.75463	6.08552	4.66769	6.16462	3.40816	5.76791	5.6142	5.37136	3.31415	6.23285	4.85667	5.20032	5.79056	4.32503	5.07246	2.83132	4.55397	6.03919	6.21411	5.38067	5.54923	2.62465	6.0287	1.99235	6.23924	5.58636	5.18726	3.89542	3.56604	5.9596	1.93815	5.41872	3.03522	5.25222	5.32998	5.26814	6.13935	6.00715	5.53951	4.58834	4.63772	5.93919	4.06497	1.95233	5.82963	3.77426
CHGB	4.94554	5.06437	5.99162	4.92338	5.52387	5.9026	6.70287	6.0727	6.5421	4.11223	4.23867	5.09736	5.65913	4.63686	4.44962	5.13522	5.64561	5.78086	5.39927	4.60769	3.66739	2.09185	5.4583	6.47313	5.25807	3.84738	6.28471	4.40592	5.63606	5.69672	5.28799	3.10119	2.90638	4.34202	6.00697	5.2173	5.56003	4.32138	5.19571	3.89549	4.24029	4.93993	4.16341	5.15769	6.54056	6.2863	5.89796	4.43573	5.39109
NCRNA00092	3.618	4.75542	3.92657	1.97415	3.81697	1.9685	3.77562	5.27287	4.21328	3.1688	2.8573	3.59428	4.65965	5.04386	3.74614	4.73563	4.99967	4.47496	4.0227	3.50591	2.02528	3.57965	4.53461	3.56486	4.79837	3.36863	3.83167	3.77023	3.60908	3.74168	5.01283	2.00993	1.97841	4.49121	5.21134	5.25745	4.22945	2.9381	4.78575	2.8303	1.94433	4.83766	3.81979	4.23514	1.91913	5.1264	5.74533	5.0295	5.02948
UNC80	2.88546	1.94309	1.91915	3.01399	1.93233	2.81296	3.97022	4.74441	4.02626	5.16558	4.78575	4.79528	2.87605	3.72499	1.9036	3.10641	4.32503	4.82246	5.07279	1.96301	4.39818	2.09185	3.92144	3.56486	2.62465	4.73217	3.08578	3.48943	4.62745	3.89392	3.14209	4.04224	3.35091	3.04222	4.73239	3.4973	4.22945	3.39172	4.99935	3.26485	2.93985	3.51752	2.00463	4.56482	4.49546	1.9512	2.81055	3.58965	2.84807
TRIM15	4.08637	1.94309	4.28787	4.31511	4.85951	3.51959	4.11644	1.91687	4.7453	5.59239	1.92328	3.94441	4.88652	2.98019	3.74614	5.55128	3.12583	1.89419	4.40516	1.96301	2.02528	4.05762	3.16844	5.9728	3.30008	4.37271	3.55091	4.40592	2.87895	3.89392	5.22996	4.75628	3.82961	4.65233	4.31651	4.80422	5.35314	3.6726	3.13143	3.89549	5.05653	3.05002	4.16341	2.85306	1.91913	3.59256	1.95233	3.30932	3.29543
RAPSN	4.55386	1.94309	4.89012	3.47352	4.70531	5.23915	5.81599	3.98932	5.69105	4.11223	3.58274	4.16509	4.69189	4.18488	4.65429	3.10641	3.40036	3.99712	5.51807	3.50591	2.02528	2.09185	3.16844	5.75782	5.20918	4.84052	5.47682	3.48943	4.07861	4.94449	4.97006	3.10119	4.65761	4.5514	1.88259	3.77828	4.6311	4.39294	3.40523	1.95988	5.93293	4.25416	5.02144	3.30059	5.68539	5.87596	5.0366	1.91031	3.77426
NLRP10	4.89208	5.04013	5.12151	3.95132	4.18777	5.45773	4.8708	4.92446	4.71826	5.00296	4.85242	1.92734	5.04226	1.89913	4.65429	3.85914	4.99967	4.47496	4.50308	3.50591	3.66739	2.09185	5.13605	5.86911	3.02964	4.86363	3.08578	5.86385	4.66224	4.11626	3.89542	4.79556	5.28732	1.93815	5.12058	3.4973	4.7724	4.13991	3.60463	5.12868	5.13188	1.929	3.53889	3.93078	3.69169	1.9512	3.24311	4.24356	4.1458
GPR27	4.55386	4.47396	3.44953	1.97415	4.91892	4.69703	3.02787	4.99596	4.40984	5.23683	3.58274	4.74402	4.54577	5.05824	4.50999	5.00724	5.45695	5.02979	4.12367	4.80795	2.02528	2.09185	3.16844	4.98568	4.40689	3.99806	1.99235	3.02487	4.45306	2.822	4.57048	3.10119	1.97841	1.93815	5.51628	4.93978	5.33447	3.39172	5.09477	1.95988	2.93985	5.42904	2.00463	4.80273	4.49546	4.62168	1.95233	3.30932	4.30254
GOLT1A	1.90756	1.94309	3.73054	3.75463	3.96802	3.87261	3.02787	2.71364	1.95319	4.65807	3.30279	1.92734	4.65965	4.18488	4.44962	4.9204	5.02015	5.16815	5.41895	3.78684	2.02528	5.36399	3.64332	4.55237	1.89017	1.94704	1.99235	4.22956	5.04426	3.89392	4.80091	3.10119	3.82961	4.49121	2.86137	3.4973	4.87713	4.56054	2.71501	4.11976	3.39408	3.05002	4.45775	4.88442	3.96772	1.9512	2.81055	2.86145	4.36608
LOC440925	4.08637	3.28928	1.91915	5.57508	2.88928	5.27163	3.02787	2.71364	1.95319	4.86672	3.93313	4.90062	3.60551	2.98019	4.08826	1.88175	3.75402	4.37771	4.45659	3.98257	4.57012	4.325	1.93492	4.22093	1.89017	4.3007	3.55091	4.40592	4.39702	3.54254	3.61807	4.79556	2.90638	4.80316	4.73239	1.97323	3.57604	4.80685	3.88357	5.32708	3.87268	1.929	2.00463	5.24768	4.49546	3.12125	1.95233	4.61084	4.7233
LIPN	3.618	4.80433	5.05462	3.01399	1.93233	3.99593	4.32696	4.8829	2.83619	3.44434	4.31152	1.92734	4.25854	4.06802	4.61117	4.86794	4.2718	4.95451	2.83132	3.98257	4.39818	3.57965	4.11194	3.28494	2.62465	5.04077	1.99235	5.70641	3.60908	4.53581	1.88593	3.56604	4.53172	1.93815	3.94271	1.97323	4.14547	4.39294	3.98721	4.85483	5.60911	3.05002	4.28053	2.85306	4.49546	3.59256	3.52065	4.76255	1.90037
GUCY1B2	2.88546	1.94309	4.75488	4.46744	4.67309	4.43625	4.40684	5.39146	4.65855	5.24826	3.30279	1.92734	2.87605	4.92327	5.13697	5.25657	5.26606	4.87743	4.65295	1.96301	2.02528	5.71459	4.11194	2.83973	4.69633	3.36863	4.74051	3.02487	1.91666	4.01564	5.19641	3.10119	4.20263	4.80316	5.46252	4.69469	4.04609	4.13991	3.75895	2.8303	4.60686	3.99251	2.00463	5.02192	3.21438	5.14153	4.09827	4.15945	4.30254
ALS2CR11	4.55386	3.28928	4.9334	1.97415	2.88928	5.25901	3.97022	4.33252	4.46142	1.93246	3.93313	4.74402	4.1746	3.44411	3	4.73563	5.08385	3.72323	3.74808	5.55495	2.02528	5.22857	4.25413	3.28494	5.41311	5.29139	3.08578	1.93755	3.60908	4.94449	4.9466	3.56604	3.35091	3.04222	5.7575	3.03522	4.94437	5.40146	3.60463	2.8303	3.87268	4.61014	4.16341	2.85306	4.29564	3.12125	3.72024	4.15945	3.77426
WFIKKN2	3.9665	4.56236	5.38359	1.97415	3.96802	3.51959	4.75315	3.13336	4.50808	3.44434	3.93313	4.24944	3.60551	3.44411	1.9036	1.88175	3.59982	4.47496	5.49265	1.96301	3.66739	3.57965	3.16844	4.46493	5.08192	5.74405	3.08578	4.11291	3.32862	3.54254	4.57048	4.482	5.6507	3.04222	4.31651	3.03522	3.29573	5.57647	2.71501	1.95988	5.18419	3.05002	4.37669	3.77951	4.49546	5.43428	2.81055	1.91031	1.90037
LOC440905	6.12467	1.94309	5.48295	5.44809	5.76937	5.12677	4.89546	6.10007	4.21328	6.07783	4.48257	4.0653	5.44531	5.34321	5.68571	5.92015	5.40069	5.37326	5.53637	3.98257	4.39818	4.89561	5.10295	5.69294	4.17888	5.05463	3.08578	3.77023	3.60908	1.91419	6.04941	4.04224	1.97841	3.78903	5.29891	3.77828	6.03292	5.15303	3.60463	2.8303	5.42082	4.34892	5.41195	4.98149	4.57086	4.86748	3.99637	3.58965	3.92554
GOLGA6L6	5.4931	4.6365	3.73054	4.71628	4.40736	6.13406	3.02787	2.71364	5.52972	3.44434	5.22925	5.50655	4.54577	3.44411	4.50999	4.9204	4.75736	3.24469	5.37818	5.14792	5.28299	6.19264	3.64332	4.13635	2.62465	3.84738	3.83167	5.128	5.43939	5.67238	4.22638	3.10119	5.4447	5.66487	3.31352	3.97446	4.51706	4.23828	4.15171	4.34536	4.7805	4.13858	4.84313	2.85306	5.36014	3.87218	1.95233	5.34046	4.99051
CLDN20	4.40331	5.25709	5.22545	4.39697	3.81697	4.32554	3.49514	5.48809	3.27328	3.92182	5.19129	5.65118	1.91747	5.59365	5.11287	4.1925	4.97797	5.05178	4.34776	6.06487	4.94211	2.09185	5.46948	4.29385	6.08783	4.43571	3.08578	3.96569	4.45306	4.27495	5.17198	4.04224	5.35094	4.2468	4.90435	4.65104	4.66341	5.41583	6.20257	2.8303	4.83392	3.99251	3.81979	5.4914	3.69169	4.41686	5.30585	3.58965	3.29543
PRAP1	4.55386	4.9233	5.13347	4.63224	5.28093	5.18756	3.02787	3.13336	3.55175	4.85001	5.28807	5.20767	5.30979	5.19555	5.41956	4.80726	5.21385	4.78109	5.69018	5.87902	6.14192	6.08143	4.11194	4.62572	2.62465	5.12808	1.99235	4.11291	3.60908	4.20142	5.60162	4.30583	4.28729	3.50842	4.80589	3.77828	4.95946	5.38119	4.87057	2.8303	5.60674	4.80738	5.62549	4.75464	4.86283	3.87218	3.72024	3.30932	1.90037
CHGA	4.08637	5.14751	5.60456	3.95132	4.5591	2.81296	3.02787	3.76174	3.90389	3.79783	3.58274	4.0653	4.25854	5.79761	4.84797	5.2994	4.21245	5.00639	5.42275	1.96301	5.04953	2.09185	3.64332	1.90676	1.89017	5.90865	1.99235	3.02487	4.72434	4.01564	4.22638	4.30583	5.234	1.93815	4.24464	3.03522	5.26453	5.3538	4.90001	1.95988	5.69133	4.49728	4.64224	4.98149	3.69169	4.83533	3.72024	3.78821	3.57564
PNLDC1	6.00234	3.76773	4.78579	1.97415	2.88928	3.87261	5.92474	3.60751	4.28736	3.79783	5.97308	5.16597	4.1746	3.44411	4.30003	6.05555	4.82926	4.78109	5.5559	3.78684	2.02528	2.09185	3.64332	5.30473	5.43903	6.21162	3.83167	3.77023	5.22708	5.90833	4.08505	6.26875	4.85917	4.5514	4.06248	4.5486	5.74654	6.34015	3.88357	3.54301	5.34847	4.34892	4.73398	4.05141	3.21438	6.13297	3.52065	4.05996	1.90037
SLC6A4	3.81606	5.27014	3.92657	4.52898	1.93233	5.17948	4.32696	5.6063	5.14106	4.02474	5.83476	5.20767	3.80398	4.77636	5.43786	4.86794	5.91077	5.49902	5.29895	5.80729	2.02528	2.09185	5.29607	2.83973	6.1135	3.36863	3.08578	4.92334	5.86417	3.89392	5.91868	2.00993	4.78415	4.73441	5.80258	3.4973	3.77455	1.9462	5.57922	2.8303	5.2767	5.84054	5.14252	4.23514	3.96772	5.11063	3.72024	3.78821	5.34763
ANKRD1	3.9665	3.76773	5.63893	4.1	5.72789	5.40995	5.99619	4.3807	6.44653	5.36465	3.78158	5.76082	5.27358	3.72499	1.9036	4.04994	3.98165	5.34433	4.28311	3.04216	4.57012	2.09185	4.45767	6.37388	4.47504	2.91775	6.0988	3.48943	5.04426	4.4475	3.14209	4.66523	4.75582	4.42223	3.79225	4.5486	3.57604	4.51092	1.93243	4.40322	4.80811	1.929	4.37669	5.14894	6.26312	6.58195	5.24644	3.30932	3.57564
C3orf72	4.40331	5.75583	3.92657	5.71811	5.15495	5.07585	5.24777	2.71364	4.81733	5.86083	1.92328	5.5549	5.17746	4.85667	5.24516	5.48805	5.73128	5.35708	2.83132	3.78684	4.57012	5.39928	5.72003	5.59758	4.5616	4.92586	3.55091	1.93755	5.35875	3.74168	5.3214	2.00993	4.20263	3.04222	5.79843	5.00315	5.94726	3.39172	4.2784	5.19036	1.94433	4.25416	3.07584	5.83055	4.6919	5.05852	5.5832	4.81057	4.04624
MYO18B	4.59484	4.04178	5.29711	1.97415	5.60133	4.87873	6.21188	4.21998	6.35528	4.53459	5.00308	3.31415	5.12155	5.1223	5.89776	5.36398	4.87584	5.28199	5.96481	4.55397	4.6964	4.325	3.16844	6.22738	5.03699	5.66717	5.82382	5.60725	1.91666	5.47436	5.67252	5.79137	3.35091	3.98401	5.12994	3.03522	4.36524	6.02972	4.07537	3.89549	4.80811	5.10117	4.28053	4.80273	6.04268	6.48304	5.50569	4.31603	4.04624
LRFN2	1.90756	3.28928	1.91915	1.97415	3.3381	1.9685	3.02787	4.07721	2.83619	2.74558	1.92328	3.59428	4.1746	4.83164	3	4.69445	4.71604	4.09764	4.54537	3.04216	5.04953	4.325	3.16844	1.90676	5.03699	3.64917	1.99235	4.40592	3.95832	4.4475	4.97006	2.00993	2.90638	5.06852	4.48486	3.03522	4.55837	2.9381	5.58607	3.89549	5.28393	4.80738	2.00463	3.30059	3.21438	1.9512	1.95233	3.58965	4.42237
FGFBP2	6.52029	5.74421	5.32441	4.67623	3.61849	4.8967	4.9807	6.65326	5.35431	4.89808	5.81588	5.61635	3.95492	5.4112	6.2605	4.53998	6.56265	5.01829	6.11486	4.94263	5.04953	3.57965	3.92144	4.29385	5.86873	6.33184	4.84878	4.53581	5.00405	5.99835	6.63651	5.28353	6.31132	4.80316	5.94165	1.97323	4.47164	5.72958	6.13397	3.54301	5.88527	4.13858	6.89131	6.59827	5.3518	6.19999	5.52718	4.15945	4.86054
LPPR1	5.64561	5.9754	1.91915	5.00646	2.88928	1.9685	5.12097	5.83947	5.59201	5.53625	4.78575	5.05111	5.27358	5.38687	5.49401	4.1925	4.61898	5.1605	4.34776	5.77766	5.04953	2.09185	5.26547	4.03637	5.81227	3.99806	3.08578	1.93755	3.95832	5.0915	4.97006	2.00993	1.97841	5.30856	5.50847	3.03522	2.84719	5.91904	6.25785	1.95988	5.18419	5.30184	5.44294	6.03455	4.86283	5.97204	5.44708	1.91031	2.84807
MYBPC2	3.33731	5.35885	5.73446	5.34188	5.34025	5.14523	6.56827	3.60751	6.66554	3.64387	3.58274	3.59428	5.47945	3.92061	3.74614	4.96636	3.59982	5.43989	4.34776	3.98257	4.57012	5.16865	4.25413	6.46296	3.88359	3.99806	6.38038	3.48943	3.95832	5.35915	4.42858	3.10119	3.63064	5.26733	3.94271	3.97446	4.04609	4.32138	3.98721	4.45506	4.45722	5.12891	4.16341	5.343	6.51122	6.77248	5.88189	5.50706	5.12586
XKR5	4.08637	5.06437	2.98693	4.96717	4.0884	1.9685	4.89546	4.94985	4.77074	4.56877	2.8573	4.16509	4.77609	4.99697	3.74614	4.3966	4.21245	4.37771	4.34776	4.24687	2.02528	2.09185	4.79564	5.06024	5.72707	3.64917	1.99235	3.77023	4.07861	3.54254	4.22638	3.56604	1.97841	3.78903	5.45938	3.77828	5.03881	3.39172	5.183	1.95988	1.94433	4.65749	2.00463	5.65406	1.91913	4.06497	5.50847	4.15945	4.74965
SP9	1.90756	4.04178	1.91915	5.18107	3.3381	4.85995	3.02787	5.01704	4.12747	3.64387	5.24327	4.24944	1.91747	4.36154	5.24516	3.10641	3.59982	3.52413	5.15166	4.55397	4.79493	2.09185	3.64332	4.22093	4.32756	4.66543	3.08578	3.02487	4.62745	5.58147	3.61807	5.14684	5.5811	3.04222	5.44645	4.41758	3.77455	1.9462	4.50226	1.95988	4.60686	1.929	4.01569	4.23514	3.21438	5.18324	4.98542	2.86145	4.962
SOHLH2	6.21975	4.47396	4.64555	5.25513	5.28303	3.71919	5.7512	4.72324	5.06876	1.93246	4.05421	4.55886	6.18058	3.92061	5.13697	4.59777	4.21245	3.52413	4.45169	3.69062	2.02528	2.09185	3.92144	5.72357	5.34632	4.29522	5.54633	4.22956	2.87895	1.91419	4.99505	2.00993	1.97841	3.04222	5.02301	3.92907	4.01371	6.27444	3.88357	3.26485	6.10949	4.52518	3.53889	4.05141	5.74595	5.25381	5.18183	4.05996	4.42237
FBN3	4.92854	3.28928	5.06906	1.97415	3.3381	4.18486	3.77562	5.58742	2.83619	5.37607	5.17478	3.94441	3.95492	4.67628	5.36808	4.98736	5.32717	5.17565	5.2632	4.12998	2.02528	4.05762	3.92144	3.91532	3.6535	4.88548	1.99235	1.93755	5.24862	3.26321	5.58036	2.00993	4.97704	1.93815	5.62798	3.97446	4.69343	4.64607	5.93884	3.74254	4.64757	3.79801	4.58834	5.45758	4.57086	3.59256	4.60029	3.30932	2.84807
CST4	3.33731	5.78168	4.36901	3.75463	5.83303	3.71919	5.4135	3.13336	4.40984	1.93246	4.78575	5.20767	5.35722	5.19555	5.4752	4.30479	5.4719	5.25997	3.74808	4.4237	2.02528	4.05762	4.86705	5.44055	5.6158	1.94704	3.08578	3.02487	5.59286	4.49371	4.76395	2.00993	5.22564	5.49796	5.20405	5.62453	4.14547	3.87038	3.40523	4.83432	3.67499	5.71911	4.01569	5.57342	3.21438	5.14153	4.38278	4.48606	4.1458
LPO	3.9665	3.76773	5.89495	3.95132	3.61849	3.87261	1.91018	5.16531	3.55175	4.3133	6.10606	4.44225	4.50041	3.92061	5.44226	3.58086	3.75402	5.76252	5.4033	3.50591	2.02528	5.25516	3.16844	4.41428	1.89017	4.43571	1.99235	1.93755	5.99682	1.91419	4.62763	2.00993	5.0535	3.50842	5.44313	3.03522	3.57604	5.34212	1.93243	5.64579	3.87268	4.34892	4.37669	6.14686	4.40564	1.9512	3.24311	3.58965	1.90037
C21orf29	4.80697	3.28928	2.98693	5.40537	5.47682	2.81296	4.2321	5.58413	3.90389	4.96696	3.78158	1.92734	2.87605	1.89913	4.3805	4.1925	4.94279	4.75868	3.54873	1.96301	2.02528	2.09185	3.92144	4.51069	4.63416	3.84738	3.08578	3.02487	4.39702	4.11626	5.55375	3.10119	1.97841	4.42223	4.52986	4.12249	5.82015	2.9381	3.60463	2.8303	4.9233	4.49728	2.00463	4.15098	4.15578	3.12125	2.81055	4.05996	3.77426
KLF14	4.18513	4.04178	4.55375	3.47352	4.40736	5.56677	5.27304	3.76174	3.27328	5.24826	3.58274	3.59428	5.12155	2.98019	5.02856	3.58086	3.40036	3.52413	5.47117	1.96301	4.99952	4.05762	3.16844	5.1401	5.0748	5.73719	1.99235	4.32529	1.91666	3.74168	3.89542	4.66523	5.4652	3.50842	3.59417	4.23987	4.59623	4.96027	3.13143	3.54301	5.2767	4.61014	5.5703	3.30059	3.21438	3.59256	3.72024	4.78727	3.57564
CDH22	3.33731	4.70003	2.98693	5.13177	4.2717	2.81296	4.8708	3.98932	5.03269	5.18657	4.31152	5.1184	5.05474	4.36154	3.74614	5.13522	1.91133	3.99712	5.2084	3.04216	5.13311	5.7422	3.64332	4.68858	1.89017	3.36863	6.21412	3.02487	5.06874	3.26321	1.88593	2.00993	3.35091	1.93815	4.16123	3.4973	4.92864	4.32138	5.183	3.54301	3.67499	5.17845	3.53889	5.30174	4.40564	5.57633	2.81055	4.05996	5.0966
HPN	4.50883	1.94309	5.32441	3.01399	4.4635	5.06472	5.0801	3.60751	3.90389	3.1688	4.23867	5.01202	2.87605	5.33729	5.02856	4.3966	4.32503	3.24469	5.43742	1.96301	4.39818	2.09185	3.92144	4.46493	4.2333	4.94459	3.55091	1.93755	2.87895	4.11626	5.2603	5.49837	4.61935	4.2468	3.31352	3.03522	5.11335	5.88238	3.60463	2.8303	4.71917	4.13858	5.06027	4.3712	4.89619	5.54594	5.86601	4.24356	5.06464
GSTM2P1	3.9665	5.77962	3.73054	5.90949	2.88928	2.81296	4.2321	4.3807	3.75112	3.64387	5.48985	5.07501	4.07535	4.77636	5.18051	4.1925	5.36792	4.87743	5.31543	4.55397	2.02528	2.09185	5.47489	1.90676	5.19445	1.94704	3.08578	4.32529	3.60908	4.70191	4.57048	3.10119	5.78969	3.98401	4.43501	3.03522	3.77455	5.08262	5.24216	1.95988	4.97897	4.25416	2.00463	4.88442	3.21438	4.32348	4.97143	3.58965	4.30254
HRG	4.08637	5.28268	2.98693	4.96717	3.61849	3.87261	4.32696	4.67748	3.90389	3.1688	1.92328	3.31415	4.25854	5.1223	4.97752	5.18474	5.27085	5.09196	3.90057	4.96481	4.57012	2.09185	4.86705	3.28494	3.30008	2.91775	4.1739	3.77023	3.80745	1.91419	5.24041	3.10119	3.82961	1.93815	4.24464	4.86403	3.92561	3.39172	4.50226	2.8303	5.13188	1.929	2.00463	5.23431	1.91913	4.20942	3.52065	3.93938	3.77426
IL5RA	4.26854	3.28928	3.73054	3.01399	4.0884	1.9685	3.02787	4.78374	1.95319	1.93246	4.48257	3.31415	1.91747	4.96194	3.46539	5.2744	2.70643	3.99712	3.26987	4.34285	3.66739	2.09185	5.15146	3.76371	3.77894	3.99806	1.99235	4.63732	4.33387	5.19476	5.7528	2.00993	4.42429	4.2468	4.78285	1.97323	4.30188	4.13991	1.93243	4.54455	3.39408	3.05002	4.01569	5.09119	4.7862	1.9512	3.72024	4.81057	5.1613
KCNT1	4.26854	1.94309	3.73054	4.1	4.67309	3.24255	5.06534	3.40816	5.23792	4.7089	3.93313	3.31415	4.33085	3.44411	4.65429	4.30479	1.91133	4.4288	1.9385	3.04216	2.02528	2.09185	3.64332	5.09237	3.49879	4.58669	3.55091	3.96569	1.91666	4.49371	4.42858	3.56604	1.97841	3.04222	4.60833	1.97323	4.81768	2.9381	5.72266	1.95988	1.94433	4.42873	2.00463	4.3077	5.10946	5.66183	2.81055	3.93938	3.57564
SORCS1	4.18513	4.80433	1.91915	3.47352	1.93233	1.9685	4.8708	4.72324	4.99265	3.79783	4.23867	3.94441	3.32509	4.06802	3	4.73563	3.12583	5.01829	4.20921	3.50591	2.02528	2.09185	4.11194	4.98568	1.89017	2.91775	4.38593	4.11291	4.80309	3.89392	3.61807	2.00993	2.90638	3.04222	5.23227	1.97323	3.29573	3.6726	1.93243	3.26485	3.67499	3.51752	2.00463	4.93608	4.29564	4.97491	4.77139	5.22773	5.6926
SPINK1	4.66693	3.76773	4.4388	1.97415	2.88928	1.9685	4.40684	4.27931	3.90389	4.11223	3.78158	4.44225	5.22539	2.98019	5.39494	5.22774	4.32503	1.89419	5.08369	4.94263	4.87504	5.49899	5.16623	4.98568	4.36883	4.3007	3.08578	4.8198	3.32862	4.92911	4.33768	5.06137	4.61935	3.04222	4.24464	3.4973	3.57604	4.9222	4.65385	2.8303	5.84134	3.05002	5.22124	2.85306	3.96772	4.32348	2.81055	3.30932	2.84807
IL17C	2.88546	4.22772	4.91236	3.47352	1.93233	5.89639	3.49514	3.40816	4.02626	4.1879	5.58847	4.77044	4.54577	2.98019	3	4.83877	4.14564	4.55557	5.3868	4.12998	5.85499	2.09185	1.93492	5.32546	2.62465	4.37271	1.99235	3.02487	5.00405	5.64389	4.57048	5.45407	4.10254	4.65233	4.16123	4.98319	4.22945	5.51739	3.40523	4.95955	4.39477	4.13858	5.06027	1.90476	4.89619	4.92492	5.89496	3.58965	4.30254
CNTN5	4.55386	5.44261	1.91915	5.04206	5.20799	1.9685	4.96116	1.91687	2.83619	5.29527	5.08864	2.8677	4.84597	4.90233	4.44962	4.47376	4.89018	4.92555	4.20921	4.24687	2.02528	2.09185	5.51018	4.35767	4.79837	5.21541	1.99235	3.48943	3.32862	4.82119	4.50496	4.482	3.63064	3.98401	5.28782	4.33629	4.04609	1.9462	4.62731	2.8303	3.39408	3.99251	2.00463	5.39592	1.91913	3.59256	4.38278	1.91031	4.69518
CALHM1	5.36877	3.28928	6.03748	1.97415	3.3381	5.67295	4.11644	3.60751	1.95319	3.79783	6.00161	2.8677	3.32509	5.17622	4.30003	4.59777	3.59982	3.72323	6.37779	1.96301	2.02528	3.57965	3.64332	3.56486	2.62465	5.7494	1.99235	3.77023	1.91666	6.02057	4.57048	5.70955	4.10254	1.93815	3.94271	1.97323	3.29573	5.7885	3.60463	3.26485	5.76396	3.51752	4.92949	3.77951	1.91913	1.9512	3.24311	3.93938	4.66505
CGB5	4.34041	4.3657	4.68516	3.75463	5.72385	1.9685	4.81626	4.21998	4.91474	5.69759	3.30279	4.49279	4.07535	1.89913	3.74614	3.58086	3.12583	4.09764	3.54873	1.96301	4.87504	4.50447	3.16844	5.51751	4.44216	4.21709	4.53565	1.93755	4.33387	3.26321	3.14209	3.10119	2.90638	3.04222	4.57081	3.03522	4.22945	2.9381	2.71501	5.3051	1.94433	3.51752	4.52748	3.58093	5.05131	5.5419	1.95233	4.37947	4.5977
ASTN1	5.87432	4.75542	2.98693	3.95132	1.93233	1.9685	3.49514	4.27931	3.55175	4.02474	5.02966	4.0653	3.32509	2.98019	5.37367	5.66498	4.41717	4.47496	2.83132	3.98257	2.02528	4.05762	3.16844	4.97161	3.49879	4.3007	1.99235	3.96569	3.60908	3.26321	5.01283	2.00993	3.63064	1.93815	4.60833	3.03522	6.11781	2.9381	3.75895	4.71318	2.93985	3.05002	3.07584	4.3077	4.15578	1.9512	2.81055	4.53151	5.59516
KIAA2022	4.459	5.06437	4.64555	3.75463	2.88928	3.87261	3.97022	5.41047	3.75112	3.79783	4.94333	4.0653	3.80398	5.278	5.28447	5.35746	6.01488	5.91918	5.31004	4.7386	2.02528	2.09185	5.49558	4.55237	5.39533	3.64917	1.99235	4.32529	5.471	5.32173	5.60162	3.56604	4.48094	5.20969	5.93499	3.4973	3.29573	2.9381	5.62678	4.34536	3.67499	5.83073	4.01569	5.34778	4.49546	3.59256	3.87339	4.98913	5.35686
PGLYRP2	4.26854	3.76773	5.67865	1.97415	1.93233	4.84022	3.02787	3.40816	1.95319	3.44434	4.37535	2.8677	4.84597	4.18488	1.9036	4.47376	3.75402	3.87538	3.54873	3.50591	4.57012	2.09185	1.93492	4.89204	2.62465	5.26307	3.08578	5.15304	4.39702	2.822	5.10154	3.8469	1.97841	3.04222	4.06248	1.97323	4.30188	4.13991	4.21878	3.26485	5.41148	3.05002	2.00463	3.93078	1.91913	4.56284	4.43482	3.30932	3.92554
ADH1B	4.34041	3.28928	4.49978	5.70665	4.76336	2.81296	5.52592	3.88603	5.37774	1.93246	5.04227	4.74402	3.32509	5.01329	5.22795	5.19604	4.75736	5.51384	4.68374	4.69913	3.66739	2.09185	3.16844	5.29933	3.49879	1.94704	5.83364	5.82904	4.94253	5.57537	5.56066	3.10119	1.97841	5.12674	5.30963	1.97323	4.22945	4.9222	1.93243	4.61971	5.40185	5.30184	3.07584	5.39186	4.95535	5.52511	4.74718	6.09897	5.81889
ANXA13	2.88546	4.47396	4.07439	3.47352	5.09212	1.9685	3.49514	3.40816	4.50808	5.56284	5.13914	4.61807	5.12155	2.98019	1.9036	4.77301	3.12583	1.89419	4.28311	4.12998	4.13978	4.325	3.64332	4.13635	3.88359	2.91775	5.00478	4.68059	4.45306	3.74168	4.08505	4.04224	1.97841	3.78903	3.31352	3.97446	5.00129	1.9462	3.88357	5.2626	4.64757	4.61014	2.00463	3.77951	4.29564	5.19609	4.90976	5.17362	4.04624
LUZP2	5.39569	5.66992	1.91915	3.47352	2.88928	1.9685	5.3111	5.51058	4.28736	4.7089	4.64329	3.79302	4.1746	5.55186	5.68921	4.80726	5.30244	5.5853	5.06157	5.35494	2.02528	2.09185	5.45257	3.28494	5.48085	4.94459	3.08578	5.11476	5.35875	4.27495	5.48208	5.098	3.35091	5.08399	5.5058	4.12249	2.84719	3.6726	5.15604	3.89549	2.93985	4.98236	2.00463	5.631	3.96772	4.72029	4.72151	3.30932	4.66505
TMEM84	5.1633	1.94309	1.91915	4.39697	4.93687	2.81296	1.91018	3.13336	4.79468	3.1688	3.78158	5.30799	3.95492	4.71236	3	4.30479	3.98165	4.18284	5.62429	3.78684	4.13978	2.09185	1.93492	3.76371	5.82898	2.91775	1.99235	3.02487	2.87895	3.89392	4.42858	3.10119	1.97841	5.41264	5.46563	3.03522	4.04609	2.9381	4.38028	3.89549	2.93985	4.42873	5.06027	4.60275	3.21438	4.72029	3.87339	3.30932	2.84807
TCHHL1	4.75648	4.47396	5.52867	4.8995	4.40736	4.94614	4.9807	4.78374	5.09096	4.92715	4.8314	2.8677	5.36682	4.49176	4.2046	4.86794	4.59098	3.99712	5.09425	3.98257	5.09368	2.09185	3.16844	5.80305	3.30008	4.94459	3.55091	4.98613	5.19598	4.20142	4.80091	4.04224	4.36036	1.93815	4.16123	3.03522	5.13197	3.39172	3.13143	3.26485	5.44715	1.929	3.53889	3.93078	1.91913	4.72029	3.72024	5.30348	3.92554
CHRNA1	4.92854	4.56236	5.59203	4.31511	5.64158	5.17948	6.4524	4.15321	6.16572	2.74558	3.58274	4.38583	5.81718	5.05824	4.76242	4.1925	4.32503	4.95451	4.40516	4.55397	2.02528	2.09185	5.10295	6.202	4.86723	4.66543	6.02265	3.02487	3.60908	5.04884	4.62763	4.18931	3.35091	5.62935	3.79225	4.23987	3.77455	2.9381	4.33188	3.26485	3.39408	4.98236	3.53889	4.80273	6.23889	6.19269	5.81061	4.67809	4.5977
TEPP	1.90756	4.47396	3.73054	1.97415	2.88928	5.40186	1.91018	3.88603	5.14106	3.44434	3.58274	4.61807	3.60551	1.89913	3.74614	5.13522	4.94279	4.87743	5.18525	3.50591	4.6964	2.09185	4.92758	4.55237	4.61128	4.70009	3.55091	1.93755	4.72434	4.20142	4.08505	2.00993	1.97841	3.04222	3.31352	4.86403	5.07272	5.32998	5.06872	2.8303	4.60686	1.929	4.37669	3.30059	5.50642	4.89726	2.81055	3.78821	4.51832
POU4F1	5.57674	5.19892	5.7193	1.97415	5.11436	2.81296	4.11644	5.30051	5.10158	2.74558	1.92328	2.8677	2.87605	5.04386	4.3805	4.3966	5.18422	5.24836	5.11444	5.13463	5.04953	2.09185	4.60063	3.76371	1.89017	5.69979	1.99235	1.93755	2.87895	1.91419	5.51626	5.57086	5.93727	4.60468	5.61943	3.97446	1.89203	5.70634	5.07762	3.26485	6.17578	5.42904	5.1841	3.58093	5.53481	5.23192	5.01189	4.37947	4.97655
FOLR1	5.68105	3.76773	6.00804	4.1	4.63822	5.49589	3.97022	5.73864	4.21328	6.18135	5.85223	5.09736	4.50041	5.1223	5.52814	5.17303	4.95488	6.0661	5.87598	5.13463	5.13311	2.09185	4.45767	5.37182	3.30008	4.96243	4.53565	5.26497	6.02014	5.0915	4.22638	3.10119	5.59653	3.04222	5.81841	4.33629	4.79568	5.86283	2.71501	5.75807	5.55451	4.13858	5.7129	6.15051	5.54797	4.20942	2.81055	3.30932	4.36608
PAK3	3.618	3.28928	2.98693	3.01399	3.3381	2.81296	4.81626	4.33252	1.95319	1.93246	4.7061	3.59428	3.95492	3.92061	3.74614	4.1925	4.529	5.09196	2.83132	3.98257	2.02528	2.09185	4.11194	5.04885	4.61128	3.36863	3.55091	4.63732	4.39702	3.89392	3.14209	3.56604	3.35091	4.2468	5.25816	3.03522	4.14547	1.9462	3.13143	2.8303	1.94433	4.73904	2.00463	4.86553	4.49546	1.9512	3.24311	4.31603	5.02948
KY	3.618	5.71651	4.28787	4.52898	5.35087	1.9685	5.77177	3.60751	5.60044	5.12743	3.30279	1.92734	5.23272	5.49901	5.22795	5.98197	5.72485	5.6628	4.71246	4.9191	4.39818	4.74055	4.92758	5.58578	5.06016	5.29807	3.08578	4.11291	5.43939	4.57434	5.17198	3.8469	3.63064	4.13066	6.1718	4.77075	5.1901	4.02043	3.88357	5.86679	2.93985	5.77437	2.00463	4.63772	5.48036	5.50726	3.52065	6.21991	3.77426
NECAB2	3.618	5.95617	4.91236	5.69464	2.88928	3.71919	4.47548	5.36405	3.27328	4.89808	3.58274	3.59428	5.15983	5.57616	5.3624	4.64881	4.93032	4.47496	4.34776	5.12083	4.94211	4.89561	4.79564	5.13108	3.77894	4.54154	3.08578	4.87496	1.91666	4.33927	5.59272	4.75628	3.82961	3.04222	5.29891	1.97323	4.04609	4.94172	5.46988	2.8303	4.90277	3.51752	4.16341	5.39186	4.57086	5.67207	4.9569	2.86145	1.90037
ZNF878	5.19742	4.22772	5.27496	3.01399	3.96802	3.51959	3.77562	2.71364	3.27328	4.7089	2.8573	3.31415	5.04226	4.43104	4.99533	4.30479	4.32503	4.51703	4.12367	4.7386	2.02528	2.09185	4.11194	4.29385	4.32756	4.3007	1.99235	3.48943	4.5032	5.28477	1.88593	4.482	4.94155	3.50842	5.34441	1.97323	4.74774	5.04138	2.71501	5.01629	5.40185	3.79801	5.04137	3.77951	5.14348	1.9512	4.09827	4.43573	4.77438
MUC21	5.21327	5.16552	6.01707	1.97415	2.88928	6.50393	3.49514	5.55814	5.23792	5.72519	6.42544	6.0525	3.32509	5.26311	5.93866	6.37403	5.77126	6.42984	6.25098	5.10646	5.68452	5.82303	1.93492	4.22093	4.40689	4.81596	1.99235	5.97194	5.86133	6.46707	4.22638	3.56604	5.57308	5.83366	5.31998	5.68142	4.30188	6.4389	6.40177	4.20586	5.43429	6.17742	5.46012	5.49995	6.04056	3.59256	4.74718	4.15945	6.42109
UNC45B	5.11508	3.76773	5.05462	3.47352	5.00117	5.32824	6.29619	3.40816	6.20907	1.93246	3.93313	4.16509	5.33177	1.89913	4.08826	4.47376	4.06954	4.7098	5.96481	3.78684	3.66739	2.09185	3.64332	6.12404	3.97281	5.69161	5.85597	3.48943	3.60908	5.25543	3.14209	5.70955	4.94155	3.98401	4.24464	3.4973	2.84719	5.06941	3.88357	3.74254	4.64757	3.05002	5.02144	4.63772	6.07566	6.36673	5.53231	4.24356	4.63268
DYSFIP1	4.08637	3.76773	5.38891	3.75463	5.17359	4.7977	6.02156	4.59828	6.02994	3.44434	5.13914	4.32213	4.1746	4.28074	4.56339	4.3966	4.75736	4.37771	3.26987	3.78684	4.39818	4.63693	3.16844	5.85345	4.7505	3.99806	5.65699	3.02487	3.95832	4.60987	4.62763	5.50347	2.90638	3.78903	4.37931	3.4973	3.29573	4.83271	3.60463	1.95988	4.64757	3.79801	4.28053	4.23514	5.86418	6.33186	5.63144	4.31603	2.84807
CYP2B7P1	3.81606	4.6365	5.33721	4.46744	3.81697	5.85222	4.47548	5.03696	3.27328	5.59758	5.3055	5.37938	1.91747	5.57096	4.2046	3.85914	4.14564	4.9403	4.92499	3.78684	2.02528	2.09185	4.11194	5.02489	4.32756	3.99806	3.08578	5.31292	5.66351	5.46531	5.63701	4.40142	2.90638	4.13066	5.12994	5.19524	5.71192	4.74964	3.60463	3.89549	3.87268	5.4185	4.01569	5.61865	5.58027	4.20942	3.87339	4.57293	4.55974
LOC153328	5.58559	5.19892	5.45486	3.47352	4.51373	4.91388	5.38684	4.3807	4.02626	5.37607	5.24327	5.33543	3.32509	5.23112	5.32591	4.53998	4.69378	3.87538	5.02563	5.55844	4.39818	2.09185	4.25413	2.83973	5.04488	5.51278	1.99235	3.48943	4.5032	3.74168	4.80091	2.00993	5.73844	1.93815	4.31651	4.48753	4.4214	5.0954	5.46988	4.11976	5.72052	3.05002	5.26522	4.63772	1.91913	4.49539	5.08148	5.25503	1.90037
ACTL8	4.80697	4.22772	3.73054	5.47655	3.61849	3.87261	3.02787	5.58413	4.02626	2.74558	5.05444	3.59428	4.74987	5.0289	4.6935	5.56421	3.87835	4.18284	4.0227	4.65575	4.87504	4.325	4.70912	5.09237	2.62465	4.43571	3.08578	5.03987	4.62745	5.35915	5.48208	2.00993	4.72545	4.49121	5.31998	4.41758	3.29573	4.32138	4.67883	1.95988	4.56215	6.20362	4.73398	4.3077	1.91913	3.12125	4.60029	1.91031	3.57564
MGC2889	2.88546	3.28928	4.68516	4.71628	4.81427	1.9685	3.77562	4.96193	3.27328	4.36622	1.92328	4.49279	4.65965	3.72499	4.72938	3.85914	4.89018	4.92555	3.26987	4.69913	2.02528	5.27987	3.64332	2.83973	4.96666	4.70009	3.08578	3.48943	3.60908	4.27495	5.03245	3.10119	5.1168	1.93815	4.31651	3.4973	4.7724	4.68341	4.99935	1.95988	2.93985	4.13858	4.84313	4.75464	4.40564	4.20942	3.87339	1.91031	2.84807
CSMD1	4.08637	4.04178	5.75285	5.81717	2.88928	5.51323	4.78592	5.62674	4.58946	3.1688	5.83078	6.08957	1.91747	5.41582	6.01738	6.06457	4.45744	5.11043	5.47433	4.94263	2.02528	2.09185	4.36611	5.75163	5.92861	5.55481	4.46645	1.93755	5.50244	4.8414	4.76395	4.482	5.33919	5.71313	5.84097	4.12249	4.4214	5.54254	4.65385	3.26485	5.57662	4.13858	5.7196	5.61685	4.57086	4.32348	5.78307	3.93938	4.23001
NOG	3.618	4.75542	4.89012	3.47352	4.95399	1.9685	5.42841	4.07721	5.60044	5.5447	1.92328	4.38583	3.95492	4.06802	4.08826	3.10641	2.70643	3.24469	3.54873	1.96301	2.02528	2.09185	3.16844	5.63176	3.88359	2.91775	5.34838	3.96569	3.60908	4.11626	3.14209	2.00993	1.97841	3.04222	3.59417	3.4973	3.92561	3.87038	5.14895	5.06552	1.94433	4.70021	3.07584	1.90476	5.69778	5.83566	4.74718	5.22054	4.84068
ACTN2	4.9923	3.76773	5.66929	3.75463	5.4734	5.28377	6.51783	3.98932	6.68848	3.92182	3.93313	4.38583	5.53474	1.89913	3.46539	4.83877	4.14564	5.80782	4.50308	4.24687	2.02528	2.09185	4.8985	6.51482	3.97281	3.36863	6.34296	4.11291	1.91666	5.14703	5.28799	3.10119	1.97841	4.13066	4.60833	4.41758	4.81768	4.23828	3.40523	3.26485	4.02267	4.73904	4.01569	5.57342	6.51764	6.80692	5.92754	4.37947	3.92554
C5orf49	4.34041	4.3657	3.44953	3.47352	3.61849	3.24255	4.63587	4.8364	3.90389	1.93246	4.37535	5.09736	3.80398	5.24753	4.56339	4.64881	2.70643	3.72323	2.83132	3.04216	3.66739	2.09185	3.16844	4.51069	4.17888	3.64917	1.99235	1.93755	5.317	5.43968	3.89542	2.00993	3.35091	1.93815	4.90435	3.77828	4.74774	3.39172	3.40523	4.11976	3.67499	4.55717	3.07584	5.38771	3.21438	1.9512	1.95233	2.86145	5.14404
PROM1	6.06538	5.06437	6.02892	4.46744	3.96802	5.7239	3.49514	6.28027	4.96337	4.63024	6.13476	5.12847	3.95492	5.91957	5.75831	5.91943	6.14696	6.33884	6.06043	5.43934	5.28299	4.63693	3.64332	5.61252	5.24547	3.64917	1.99235	5.78818	6.29882	5.78904	5.88661	3.10119	6.12097	5.08399	6.04188	5.13302	4.92864	6.0951	3.75895	6.04734	5.9843	4.93993	6.28472	6.17136	5.94004	3.87218	3.87339	4.24356	5.49515
FCRL1	2.88546	1.94309	3.73054	3.75463	2.88928	1.9685	4.47548	3.40816	3.27328	3.1688	5.16621	1.92734	2.87605	3.44411	1.9036	5.06091	4.21245	3.72323	1.9385	4.49323	2.02528	2.09185	3.64332	3.91532	3.02964	2.91775	3.55091	4.40592	1.91666	5.2791	4.99207	2.00993	2.90638	4.65233	4.78285	1.97323	4.51706	3.6726	3.13143	4.40322	4.14201	4.65749	2.00463	4.95184	4.15578	3.59256	4.83658	6.06253	5.85503
AQP5	3.81606	4.84805	6.261	4.21806	2.88928	5.69107	1.91018	5.93785	4.35226	4.65807	6.10784	5.82462	4.72189	5.70856	5.86059	5.40039	5.52278	6.31561	6.3504	5.40007	6.15921	4.325	3.92144	4.55237	4.2826	3.36863	1.99235	6.34471	6.46041	5.52826	4.83479	4.40142	6.02647	4.2468	5.68497	4.73439	5.35314	6.22763	4.65385	6.11846	6.193	5.40191	5.96969	6.42114	6.14135	4.20942	3.52065	1.91031	5.0416
CNTN2	4.18513	3.28928	2.98693	4.98732	4.97038	3.51959	4.53545	3.13336	4.40984	3.64387	4.05421	1.92734	1.91747	2.98019	3.46539	5.17303	2.70643	5.31712	2.83132	3.04216	4.79493	5.46003	3.16844	3.76371	4.63416	3.36863	1.99235	4.7891	3.80745	3.26321	3.61807	3.56604	2.90638	3.50842	4.70458	1.97323	4.4214	3.39172	3.40523	4.01819	3.87268	4.25416	2.00463	4.05141	1.91913	1.9512	1.95233	4.70816	5.41439
VWDE	5.87164	1.94309	4.4388	1.97415	3.61849	3.24255	1.91018	4.97363	3.55175	4.95416	4.52834	1.92734	4.1746	4.63686	5.77836	5.02602	5.37814	5.31235	3.90057	4.80795	2.02528	2.09185	4.60063	4.98568	5.9995	5.60783	1.99235	4.11291	5.01794	4.53581	5.22996	3.10119	2.90638	4.73441	5.49211	4.77075	4.89509	4.51092	6.19181	5.42614	3.39408	4.70021	2.00463	5.49428	4.82633	4.67375	1.95233	4.24356	4.63268
PAPPA2	2.88546	5.94439	2.98693	4.52898	4.88033	3.24255	4.96116	6.0971	4.79468	4.1879	3.78158	4.16509	4.86678	5.11042	4.65429	5.26561	5.73841	1.89419	3.26987	1.96301	3.66739	4.95615	5.25459	4.87393	3.02964	4.96243	4.02692	1.93755	1.91666	3.26321	5.54304	6.01585	4.48094	3.04222	4.98246	1.97323	4.4214	4.02043	4.38028	3.89549	2.93985	1.929	3.53889	5.43727	4.29564	3.87218	5.23311	3.78821	3.57564
GPR81	5.92268	3.28928	5.02389	3.47352	3.3381	5.72778	4.47548	4.15321	3.55404	3.1688	6.00492	3.31415	4.1746	3.72499	4.79331	4.53998	3.59982	5.01829	5.92282	3.04216	4.79493	4.05762	3.64332	4.81415	4.40725	5.44348	1.99235	3.96569	4.39821	5.7177	3.14209	6.0276	4.20449	3.04222	3.94402	4.12249	4.92864	5.1077	3.99193	4.28019	4.60686	3.05002	5.65231	5.27294	3.69515	3.12125	4.18462	4.53151	4.23001
B4GALNT2	4.26854	4.98626	2.98693	5.82212	5.42866	6.46232	5.31818	5.15856	6.07719	5.58529	3.30279	5.78703	5.77258	5.53736	3.74614	3.85914	5.92959	5.00639	4.20921	4.34285	3.66739	5.66367	1.93492	5.28252	5.44572	5.13895	1.99235	3.96569	5.68977	5.01311	5.58661	2.00993	3.63064	5.48105	6.12856	5.14639	5.39522	2.9381	3.75895	5.02923	3.39408	4.83766	3.53889	4.7794	4.98181	5.9699	5.60355	1.91031	5.61025
ORM1	4.18513	1.94309	5.44194	3.47352	2.88928	5.67007	1.91018	1.91687	3.90389	2.74558	5.38035	4.93594	1.91747	2.98019	1.9036	4.1925	3.12583	4.4288	5.25033	4.12998	5.76111	5.49899	3.16844	5.29382	4.96666	3.36863	3.55091	3.48943	1.91666	3.89392	4.33768	4.18931	3.35091	3.04222	2.86137	4.12249	4.04609	5.22026	1.93243	2.8303	5.4162	1.929	4.80975	1.90476	4.29564	3.12125	3.52065	2.86145	3.77426
GATSL2	4.34041	4.95605	3.92657	3.47352	1.93233	5.68667	3.97022	5.61082	4.12747	5.38345	4.73438	5.41773	4.54577	5.69757	3.94133	5.50821	3.12583	5.09196	4.83253	5.34074	2.02528	2.09185	1.93492	5.23278	4.69633	3.36863	3.08578	5.36091	1.91666	5.51828	3.14209	4.18931	5.25791	4.34202	3.79225	4.8909	5.00129	3.6726	5.15604	5.07684	4.39477	4.83766	2.00463	5.27885	4.40564	5.62249	4.92613	3.58965	3.29543
HAND2	4.75648	5.55577	2.98693	4.84698	2.88928	1.9685	5.48928	5.00664	4.40984	4.91289	4.94333	3.59428	5.23992	2.98019	4.08826	4.86794	4.59098	4.59107	4.28311	3.04216	4.13978	2.09185	5.49558	5.28252	5.27414	1.94704	5.00478	4.11291	4.2616	2.822	4.99207	3.10119	2.90638	4.93656	5.08033	4.5486	1.89203	1.9462	5.26814	3.89549	4.68483	5.20073	2.00463	4.23514	3.69169	3.87218	5.0366	1.91031	5.61924
KRT84	3.33731	5.95328	1.91915	1.97415	4.34408	2.81296	3.77562	2.71364	3.75112	4.75438	1.92328	3.94441	4.65965	4.54543	4.65429	4.04994	4.06954	2.80323	3.26987	4.69913	4.87504	2.09185	4.92758	3.28494	4.11834	4.43571	4.77978	4.84832	5.56593	2.822	1.88593	2.00993	3.35091	6.13882	3.94271	3.03522	4.14547	1.9462	2.71501	5.12868	5.17435	4.86582	2.00463	4.05141	1.91913	1.9512	2.81055	4.31603	5.67041
BIRC7	2.88546	4.04178	3.44953	4.31511	4.51373	1.9685	4.71753	3.88603	3.55175	5.59758	3.30279	4.49279	4.90533	4.54543	3.74614	3.58086	3.75402	4.09764	3.54873	3.04216	4.99952	2.09185	4.83293	4.41428	3.49879	2.91775	3.08578	3.96569	3.32862	2.822	4.08505	3.10119	3.35091	4.49121	2.86137	4.83523	2.84719	1.9462	2.71501	3.26485	3.39408	4.55717	2.00463	2.85306	3.69169	4.92492	4.18462	4.05996	3.29543
BMP3	4.89208	4.3657	5.12151	6.5965	2.88928	4.48355	1.91018	5.64829	3.27328	4.11223	5.47425	5.44447	2.87605	5.86199	4.87287	5.42232	4.75736	5.78337	5.91617	3.78684	4.6964	4.05762	4.92758	4.46493	4.47504	1.94704	1.99235	5.51943	6.08713	5.18726	5.44823	2.00993	5.34514	4.97929	5.23893	5.10466	5.10363	5.23722	3.40523	4.91068	5.45949	5.72608	5.11181	5.72252	5.45162	3.59256	4.77139	4.05996	5.61389
GPR25	3.618	1.94309	4.07439	1.97415	4.76336	2.81296	3.49514	4.33252	1.95319	2.74558	3.78158	3.31415	3.95492	4.77636	4.2046	3.85914	3.87835	3.87538	3.26987	1.96301	3.66739	2.09185	1.93492	3.28494	3.02964	1.94704	4.69736	3.48943	3.95832	3.74168	4.33768	2.00993	2.90638	4.13066	3.79225	4.8909	4.66341	3.6726	1.93243	3.74254	1.94433	4.80738	2.00463	4.47784	3.21438	4.06497	3.24311	5.07712	4.51832
LOC400696	4.18513	1.94309	5.22545	3.01399	5.64343	1.9685	5.50453	4.3807	4.02626	3.44434	3.30279	4.24944	4.95678	5.54326	3.46539	4.04994	2.70643	4.09764	1.9385	1.96301	3.66739	2.09185	1.93492	3.91532	2.62465	1.94704	5.43171	3.02487	5.45738	3.54254	4.62763	2.00993	2.90638	3.78903	1.88259	5.23798	4.22945	3.39172	4.2784	3.26485	3.67499	4.83766	3.81979	2.85306	4.57086	5.36081	2.81055	4.97461	4.36608
SSTR5	5.73369	5.01416	5.25929	1.97415	4.34408	5.15411	4.71753	2.71364	4.71826	4.36622	5.61851	4.24944	4.1746	5.5124	5.38448	4.89507	3.75402	4.37771	5.06157	4.89408	2.02528	2.09185	1.93492	5.26479	4.78303	4.70009	3.55091	1.93755	4.17783	5.42593	1.88593	2.00993	5.80909	1.93815	4.86794	4.23987	4.95946	5.51073	4.59914	1.95988	5.73101	5.12891	3.81979	4.98149	4.63551	5.11063	1.95233	3.58965	4.1458
CKM	5.80472	4.47396	5.93912	4.46744	5.66816	5.77486	6.6346	4.50198	6.75956	5.48186	4.56999	4.49279	5.70709	3.44411	4.3805	5.35078	4.529	5.76702	5.71835	4.4237	5.30642	5.13456	4.25413	6.62477	4.36883	5.86166	6.44695	5.14075	3.80745	5.65477	3.89542	5.22803	5.10498	3.98401	4.24464	3.4973	4.87713	5.21143	3.13143	4.34536	5.65044	4.25416	5.47104	5.62578	6.59502	6.9198	6.18427	3.78821	3.77426
ACTBL2	3.618	4.47396	3.44953	3.75463	4.78959	3.51959	4.81626	4.50198	4.87859	5.54051	1.92328	4.44225	4.84597	3.72499	3.74614	4.69445	3.12583	4.25629	4.12367	4.83875	2.02528	2.09185	4.25413	5.12182	3.6535	4.43571	3.08578	3.02487	4.94253	1.91419	1.88593	2.00993	4.10254	1.93815	4.43501	5.15926	4.81768	4.85705	3.13143	4.97455	1.94433	1.929	4.01569	4.05141	5.15926	1.9512	2.81055	4.43573	3.57564
KRT24	5.20543	5.34905	5.77624	4.39697	1.93233	6.58926	1.91018	5.76348	5.72026	6.22973	5.79904	5.78403	5.20231	6.43769	6.17028	6.40644	5.02015	4.82246	6.52961	5.406	6.23609	2.09185	5.52406	4.13635	5.35311	3.84738	1.99235	4.63732	6.16505	6.56337	5.96214	4.92377	6.3793	1.93815	3.31352	6.33098	4.89509	6.57488	6.26006	1.95988	5.67719	3.05002	4.77355	5.44761	6.48338	1.9512	5.73256	5.66721	6.06957
DNAI2	2.88546	4.22772	2.98693	3.01399	1.93233	5.19356	4.2321	4.59828	2.83619	2.74558	3.58274	3.94441	3.60551	5.37091	1.9036	3.58086	3.12583	4.09764	4.1115	4.60154	2.02528	2.09185	4.21789	1.90676	3.77894	3.84738	1.99235	3.02487	5.15247	5.34102	4.22638	2.00993	3.35091	3.78903	3.31352	3.03522	4.51706	4.50138	1.93243	3.89549	4.14201	3.79801	2.00463	5.33694	1.91913	4.41686	1.95233	4.73161	5.02948
HHLA2	5.7225	3.28928	5.18765	3.01399	3.61849	5.38933	1.91018	5.19107	5.14106	2.74558	3.78158	3.94441	1.91747	4.54543	4.89622	4.1925	5.12318	4.75868	5.49265	4.4237	4.39818	2.09185	4.45767	2.83973	4.63416	5.41315	4.77978	4.11291	4.62745	4.91311	5.2603	3.8469	4.36036	4.13066	4.16123	4.5486	3.92561	5.06941	4.65385	3.74254	5.3868	3.05002	5.7602	4.7794	1.91913	3.59256	4.63382	4.31603	4.1458
HTR3A	4.26854	5.04013	5.18765	5.08971	1.93233	5.25251	4.75315	4.42459	4.94785	3.64387	5.0776	4.0653	5.06679	5.47391	6.04833	5.94556	5.65807	6.09297	5.16038	6.27269	5.20097	5.93622	3.64332	3.76371	2.62465	3.64917	4.64953	5.77607	5.74008	6.16345	5.78121	2.00993	5.94229	3.78903	6.5077	1.97323	4.6311	5.08262	5.3058	5.02923	5.79413	4.61014	4.9782	5.11156	4.57086	3.12125	4.43482	5.56502	5.5509
ROS1	5.00669	5.8998	3.92657	4.84698	5.81333	2.81296	5.16881	5.34938	5.93188	6.41901	4.05421	4.79528	5.92213	5.35472	1.9036	4.59777	4.06954	4.68308	3.54873	4.7386	5.13311	2.09185	4.8985	6.18199	3.97281	5.85915	4.38593	5.60185	4.2616	3.74168	4.42858	4.92377	3.63064	4.42223	5.6474	4.12249	6.1346	5.3538	4.21878	5.69091	1.94433	5.33186	3.53889	4.3077	5.52567	5.50262	4.38278	4.37947	4.21094
ARL14	4.63238	5.3064	3.73054	5.00646	6.16852	4.7245	5.39779	3.98932	4.79468	5.89079	4.31152	4.44225	5.98822	2.98019	4.61117	5.36398	1.91133	4.59107	3.90057	1.96301	4.79493	5.97879	3.16844	4.29385	3.30008	5.35822	5.11522	5.51943	6.04843	4.89637	3.61807	3.56604	3.98136	5.76428	4.57081	5.00315	5.6218	3.6726	4.50226	5.3806	3.87268	4.73904	4.01569	2.85306	5.71863	3.87218	2.81055	5.66721	5.57916
SFTPB	3.618	5.08707	5.40931	3.47352	4.76336	2.81296	4.40684	4.56837	4.99265	1.93246	2.8573	2.8677	3.80398	4.63686	4.2046	3.58086	4.32503	4.68308	3.26987	3.04216	4.39818	2.09185	3.92144	3.76371	5.71551	2.91775	3.55091	5.76624	3.60908	5.62922	4.62763	4.18931	3.98136	4.13066	5.21134	4.73439	5.70337	4.13991	3.13143	1.95988	4.32329	4.96174	4.28053	4.82478	1.91913	3.59256	3.72024	4.64575	3.77426
KRT77	4.75648	5.89481	3.44953	5.42748	5.09212	3.99593	3.77562	5.21497	5.25165	2.74558	1.92328	5.10806	4.1746	5.42487	6.17009	4.53998	5.9854	5.93029	4.50308	5.48323	5.76111	2.09185	4.79564	4.03637	6.09572	3.64917	1.99235	5.18748	5.59498	4.01564	5.9955	2.00993	4.85917	6.19786	6.19233	1.97323	3.77455	4.32138	5.51275	4.94392	4.68483	5.26863	2.00463	4.15098	1.91913	5.65388	3.52065	3.93938	4.69518
TRIM55	1.90756	1.94309	4.36901	3.01399	4.5591	3.99593	5.7833	2.71364	5.72544	5.35677	3.78158	4.0653	4.65965	4.59347	1.9036	4.47376	3.40036	3.24469	1.9385	3.50591	4.57012	2.09185	3.92144	5.63344	1.89017	4.21709	5.30589	3.48943	4.39702	5.23643	5.35857	4.40142	3.82961	3.78903	4.78285	1.97323	4.91223	3.6726	1.93243	4.34536	3.67499	3.79801	3.07584	4.23514	5.53927	5.96114	5.27752	3.93938	4.63268
ERN2	5.03381	4.3657	5.88278	3.47352	3.81697	5.74247	1.91018	5.83591	4.46142	4.79533	5.78967	4.91869	3.32509	6.01234	5.35073	5.17303	5.09208	6.00509	6.01523	5.37508	5.09368	5.22857	1.93492	5.17397	3.88359	4.88548	1.99235	5.66263	6.264	5.698	4.80091	4.04224	5.73552	4.88847	5.64583	5.67919	5.53498	6.03562	3.60463	5.70389	5.58957	4.80738	5.5586	6.18349	5.85182	4.83533	3.87339	2.86145	4.81978
SYCP2L	5.92104	3.28928	3.73054	4.8741	3.36508	3.27534	3.77562	5.55077	3.27328	3.64387	3.30279	1.92734	3.80398	3.72499	5.38448	5.24725	5.20814	4.95451	5.18525	3.04216	3.66739	3.57965	3.92144	2.83973	5.77225	5.09324	1.99235	3.02487	3.80745	3.54254	5.50393	4.04224	3.35091	4.13066	5.65509	3.03522	4.81768	4.64607	4.2784	2.8303	5.66225	5.08644	4.80975	3.58093	4.6919	3.87218	3.72024	4.05996	4.36608
CYP2W1	6.02667	4.6365	6.17977	1.97415	4.2717	6.32415	5.31818	5.80522	4.12747	4.1879	5.70334	5.90588	4.07535	5.89817	4.44962	4.30479	3.75402	4.87743	6.332	3.98257	5.95252	5.90484	3.16844	4.46493	5.68351	5.94864	4.46645	5.60993	5.45738	5.87988	5.42133	6.28186	4.78415	4.2468	5.86022	4.65104	4.22945	5.50045	4.65385	1.95988	5.69811	5.74271	6.05059	4.3077	4.29564	4.67375	5.13069	3.93938	4.87944
GTF2A1L	4.21924	5.0245	2.90115	4.8741	5.77398	3.71919	3.75713	4.8196	4.68941	4.49772	1.92328	2.99415	4.91386	3.72499	5.05087	5.08711	4.84414	4.55667	1.9385	4.19965	2.02528	2.09185	1.93492	4.51069	3.44658	5.2711	3.55091	1.93755	4.17783	3.32192	4.66603	2.87783	5.11013	4.4531	5.09239	4.70089	1.89203	4.02043	4.54677	4.11976	2.93985	3.99251	4.01569	1.90476	4.29692	3.62638	2.81055	4.51476	4.1458
PTGER1	5.23565	1.94309	4.602	1.97415	3.81697	5.51323	1.91018	3.13336	3.90389	3.1688	4.94333	4.0653	3.60551	1.89913	4.2046	3.85914	3.87835	3.99712	4.28311	1.96301	4.13978	4.50447	1.93492	3.91532	3.49879	5.21541	1.99235	3.48943	3.80745	5.24288	4.22638	5.44187	3.98136	3.50842	2.86137	1.97323	1.89203	5.27613	2.71501	1.95988	5.54574	1.929	4.84313	2.85306	4.15578	5.07675	3.52065	3.58965	4.04624
UPK3A	2.88546	4.3657	3.92657	3.01399	1.93233	4.32554	3.02787	2.71364	1.95319	1.93246	4.48257	1.92734	4.07535	3.92061	3	4.1925	3.40036	3.99712	4.68374	1.96301	4.79493	2.09185	1.93492	4.03637	1.89017	3.64917	3.08578	1.93755	4.62745	3.89392	4.42858	2.00993	2.90638	4.2468	4.24464	1.97323	3.77455	3.39172	1.93243	4.11976	3.87268	3.05002	2.00463	4.05141	4.15578	1.9512	3.87339	4.67809	4.51832
PDIA2	5.66703	1.94309	5.8716	1.97415	4.86481	5.50758	1.91018	4.76451	4.35226	3.79783	4.43191	4.74402	3.57721	3.72499	5.45922	5.12161	4.59098	4.18284	5.39102	3.78684	4.98979	3.59326	3.16844	4.35767	4.28166	5.65785	4.1739	4.43906	3.80745	4.72866	4.99207	5.41344	3.82961	3.98401	5.36796	1.97323	4.4214	5.70653	2.71501	1.95988	5.86655	4.70021	5.5249	4.60275	4.29564	4.41686	3.87339	2.86145	4.63268
DAB1	6.16294	4.04178	4.07439	3.47352	3.61849	2.81296	4.2321	4.53638	1.95319	5.2426	2.8573	3.59428	4.90533	4.88017	4.2046	4.89507	4.41717	5.22377	4.02821	4.80795	2.02528	2.09185	4.65821	3.76371	4.53449	3.64917	4.38593	4.32529	3.32862	3.26321	4.42858	4.83152	1.97841	3.50842	5.23227	3.4973	4.14547	1.9462	3.98721	3.26485	1.94433	3.05002	2.00463	4.42747	4.40564	1.9512	4.18781	3.30932	3.29543
ONECUT1	5.36877	1.94309	3.44953	4.63224	3.81697	4.8195	3.02787	3.40816	2.83619	3.44434	4.64329	3.79302	1.91747	3.72499	3	3.58086	4.21245	3.72323	4.34776	3.50591	3.66739	2.09185	3.16844	2.83973	3.97281	4.37271	3.83167	3.02487	2.87895	4.64276	3.61807	4.30583	5.27296	1.93815	4.67486	1.97323	4.87713	4.32138	3.40523	2.8303	4.56215	3.51752	4.01569	2.85306	4.40564	1.9512	1.95233	1.91031	1.90037
HS6ST3	3.81606	4.95605	4.1916	5.92974	3.3381	1.9685	4.58843	5.56531	3.27328	2.74558	4.23867	3.59428	3.60551	4.36154	1.9036	4.30479	4.32503	5.34433	4.12367	3.78684	2.02528	2.09185	5.87816	4.46493	2.62465	3.36863	3.08578	3.77023	4.39702	3.89392	5.14556	2.00993	3.82961	3.04222	4.98246	1.97323	4.14547	3.39172	4.38028	1.95988	2.93985	5.57258	3.53889	5.64928	3.96772	3.12125	1.95233	3.30932	3.57564
SYT13	4.34041	5.78572	5.25929	6.15316	4.90009	3.51959	4.32696	4.07721	3.27328	4.63024	4.90951	1.92734	4.33085	4.43104	5.84578	5.98303	5.81273	5.75135	4.73941	3.98257	2.02528	4.89561	5.72848	5.57968	3.6535	4.43571	3.55091	4.11291	4.95888	1.91419	5.208	4.75628	3.35091	1.93815	5.64426	4.77075	5.71785	2.9381	5.17644	4.95955	3.39408	5.45387	4.37669	5.98897	4.40564	4.95073	4.25929	4.64575	3.77426
CLCNKA	2.88546	4.04178	5.47911	1.97415	2.88928	2.81296	3.02787	2.71364	2.83619	5.46575	4.37535	4.0653	2.87605	4.18488	3.74614	3.85914	3.12583	3.24469	5.76557	1.96301	2.02528	2.09185	3.16844	1.90676	3.6535	5.35271	3.08578	3.02487	4.07861	3.54254	4.22638	4.83152	1.97841	4.42223	2.86137	4.41758	4.79568	6.09335	2.71501	2.8303	3.39408	3.51752	4.01569	3.77951	3.21438	3.12125	1.95233	3.93938	3.29543
DPP6	2.88546	1.94309	3.73054	1.97415	1.93233	2.81296	4.11644	4.42459	4.02626	4.83261	4.15409	1.92734	3.32509	2.98019	3	4.30479	3.12583	5.04097	2.83132	1.96301	4.13978	2.09185	1.93492	4.89204	1.89017	4.37271	1.99235	3.48943	3.80745	4.11626	4.50496	3.10119	4.57758	1.93815	4.82767	3.03522	4.4214	4.51092	1.93243	3.26485	4.80811	3.51752	4.01569	4.15098	4.15578	3.87218	3.99637	2.86145	2.84807
TEKT2	5.25656	1.94309	3.73054	3.47352	3.81697	3.51959	3.77562	4.07721	4.02626	4.96696	5.04227	5.13823	3.60551	5.26311	4.82145	4.04994	3.12583	4.51703	5.25682	3.50591	2.02528	5.27987	1.93492	3.28494	4.81313	4.73217	3.08578	3.77023	5.20404	5.42942	4.9466	4.97529	3.98136	4.2468	5.0583	4.12249	5.32963	5.3759	3.60463	3.26485	5.35427	4.25416	4.92949	5.25418	3.96772	4.76226	3.24311	1.91031	5.06464
LOC284749	3.33731	3.28928	4.36901	3.75463	4.67309	1.9685	3.02787	1.91687	4.12747	3.92182	4.31152	3.31415	3.32509	4.43104	3	5.00724	4.06954	4.37771	2.83132	3.98257	2.02528	4.82494	1.93492	3.56486	4.40689	2.91775	1.99235	3.02487	1.91666	4.53581	4.86595	2.00993	2.90638	4.13066	4.80589	3.03522	4.8385	1.9462	1.93243	3.26485	3.67499	4.55717	3.07584	4.3712	1.91913	4.20942	3.87339	5.52862	5.39509
SFRP5	5.62771	4.22772	1.91915	3.47352	5.31201	2.81296	3.49514	2.71364	5.35916	5.16558	2.8573	3.59428	4.1746	3.44411	3	4.04994	4.529	4.18284	4.34776	3.04216	4.39818	3.57965	3.64332	5.31006	1.89017	4.43571	3.55091	3.48943	2.87895	4.27495	5.58969	2.00993	1.97841	4.93656	5.03477	5.0896	4.22945	2.9381	4.15171	2.8303	2.93985	5.11531	3.07584	4.3077	4.15578	4.95073	4.9569	4.15945	4.04624
CYP4B1	4.08637	5.37757	5.19753	5.18107	3.96802	1.9685	4.40684	5.77151	5.27119	4.41407	5.42158	6.02261	3.95492	5.94464	5.68747	5.68347	5.7105	5.90651	6.16498	1.96301	5.60386	4.325	1.93492	3.76371	4.98556	1.94704	3.55091	6.11774	6.37009	6.09199	5.18444	3.10119	3.63064	6.16577	6.12874	5.10466	5.42145	5.93874	5.83807	4.95955	5.31787	6.4613	5.73037	5.81645	5.87931	4.32348	3.99637	4.31603	6.048
CT62	3.9665	3.76773	4.68516	1.97415	3.3381	4.32554	3.49514	1.91687	1.95319	4.63024	4.48257	1.92734	3.60551	1.89913	4.44962	4.3966	3.12583	3.52413	5.12415	3.04216	4.6964	5.61006	1.93492	4.55237	3.30008	5.60088	3.08578	3.96569	4.33387	3.26321	3.89542	4.40142	3.63064	3.50842	4.24464	3.77828	5.29333	4.64607	3.60463	2.8303	4.45722	1.929	4.01569	1.90476	5.22874	3.12125	1.95233	5.14745	3.29543
NCRNA00202	5.15418	1.94309	4.84135	3.75463	3.96802	5.29549	3.02787	3.76174	1.95319	1.93246	3.30279	1.92734	2.87605	4.43104	5.71394	5.48385	5.27556	4.32061	4.50308	3.04216	5.04953	2.09185	4.25413	4.46493	5.13992	4.70009	3.55091	4.7891	3.60908	4.70191	4.86595	3.10119	4.97704	4.13066	4.06248	3.77828	5.16644	4.02043	2.71501	3.26485	5.22089	1.929	5.25474	3.93078	3.69169	4.95073	3.87339	4.48606	3.77426
NKX2-3	5.75574	3.76773	4.84135	4.31511	4.0884	3.71919	1.91018	3.13336	3.27328	4.83261	3.78158	3.31415	4.07535	4.71236	4.89622	4.86794	5.37136	4.55557	5.0128	1.96301	2.02528	3.57965	3.16844	2.83973	3.97281	4.21709	1.99235	4.53581	1.91666	5.43629	4.42858	3.56604	4.10254	3.50842	4.92134	3.4973	4.30188	5.49693	4.46495	3.54301	5.14298	3.51752	5.41841	4.56482	3.21438	5.31179	1.95233	1.91031	5.4717
PHF21B	4.59484	3.76773	2.98693	3.01399	4.6004	3.87261	3.97022	4.8829	3.55175	5.54262	3.78158	3.79302	3.95492	4.97985	4.61117	3.58086	4.14564	4.65449	2.83132	4.55397	4.13978	2.09185	3.64332	4.29385	5.30398	1.94704	4.38593	3.02487	3.80745	4.20142	4.97006	3.10119	3.63064	3.98401	4.75841	5.4601	5.33447	4.02043	5.44299	3.26485	3.39408	5.16672	5.14252	4.23514	4.49546	4.92492	3.72024	3.58965	3.77426
PKLR	4.35037	3.46404	3.2701	1.97415	3.56059	4.86166	3.10703	1.91687	3.27328	3.39431	3.39264	3.68308	1.91747	3.85704	3.40766	4.01997	4.21619	2.89173	1.9385	1.96301	5.14048	5.27673	1.93492	4.76363	3.81655	4.92739	3.59452	5.17526	3.77057	2.95627	3.28745	4.61623	5.19113	3.62915	3.67253	1.97323	4.35015	3.47297	3.4563	1.95988	4.69614	1.929	4.30322	2.95383	4.31376	4.5565	3.71498	4.99421	3.0146
MYOT	4.40331	1.94309	5.41421	4.81793	5.26761	4.69703	6.27051	4.42459	6.42337	3.64387	2.8573	2.8677	4.97249	4.59347	4.08826	4.1925	3.75402	5.30748	3.90057	4.34285	2.02528	2.09185	1.93492	6.22479	4.2826	4.54154	6.04494	3.48943	4.66224	4.95928	1.88593	2.00993	3.35091	3.78903	3.31352	1.97323	4.14547	1.9462	4.42444	4.50189	4.51261	4.25416	2.00463	5.14894	6.29523	6.48761	5.54714	3.58965	3.29543
ACADL	4.89208	5.16552	4.28787	4.92338	1.93233	3.51959	5.04994	5.05582	4.91474	4.3133	4.60814	5.23762	3.95492	4.96194	4.08826	5.28297	5.45695	5.34433	4.65295	3.78684	3.66739	3.57965	4.75462	4.74337	3.30008	3.84738	1.99235	3.02487	5.26219	3.54254	4.50496	2.00993	3.82961	1.93815	5.40755	1.97323	4.22945	3.6726	4.46495	3.26485	4.39477	4.61014	4.01569	5.17451	4.63551	5.32899	3.24311	3.93938	3.29543
DKFZp779M0652	1.90756	4.80433	2.98693	5.00646	4.73535	2.81296	4.63587	3.40816	2.83619	4.45773	1.92328	3.94441	4.33085	4.54543	3.74614	4.53998	1.91133	4.37771	1.9385	3.78684	5.16865	5.39928	4.60063	3.91532	4.6766	3.36863	1.99235	4.40592	3.80745	2.822	4.22638	2.00993	1.97841	3.04222	4.24464	1.97323	4.04609	4.02043	4.2784	4.83432	2.93985	1.929	3.53889	4.80273	3.69169	4.83533	3.87339	4.73622	4.42237
KRT79	5.55812	5.22929	6.06819	3.95132	5.23915	5.99869	3.97022	3.13336	4.12747	4.77536	3.58274	4.16509	5.64031	4.96194	4.50999	4.77301	4.75736	4.51703	6.01102	4.24687	6.18415	6.17643	3.92144	5.25864	3.49879	5.69979	3.08578	5.65381	5.06874	5.00036	4.08505	2.00993	5.36778	5.41808	4.24464	3.03522	4.69343	5.02652	4.07537	4.01819	6.14575	4.34892	5.3131	3.77951	4.29564	4.49539	3.72024	5.40311	4.1458
ZFP57	4.26854	4.56236	3.73054	1.97415	4.0884	3.87261	3.02787	4.33252	4.71826	5.39066	3.58274	5.20767	4.69189	4.18488	5.69435	4.73563	2.70643	5.12795	4.61986	1.96301	5.3863	4.50447	5.38796	5.71083	1.89017	4.66543	5.41289	3.02487	5.27522	2.822	1.88593	3.10119	2.90638	3.98401	3.79225	6.1076	4.92864	4.56054	2.71501	5.41439	4.64757	3.05002	2.00463	2.85306	4.63551	1.9512	1.95233	2.86145	4.5977
C13orf38	5.62407	3.76773	1.91915	5.41547	4.72598	3.71919	4.2321	4.99596	3.55175	4.41407	3.78158	4.75796	3.95492	3.92061	5.13697	3.85914	5.02999	4.62394	4.41058	2.53463	2.02528	2.09185	4.25413	3.41011	4.94897	3.85923	4.64953	1.93755	3.80745	2.822	4.91796	3.10119	3.63064	3.04222	5.11045	3.18387	4.25155	4.85705	3.13143	4.5837	4.95965	3.91254	4.69048	4.3712	5.07177	4.56284	3.24311	1.91031	5.05333
PPBP	4.59484	4.04178	4.72147	3.75463	3.3381	4.18486	3.49514	4.50198	3.75112	5.12743	3.30279	4.32213	4.33085	4.63686	4.2046	5.10739	3.40036	5.1605	3.74808	4.94263	5.20097	6.34087	5.45257	3.56486	4.5871	5.59129	4.53565	5.33439	4.77849	3.54254	4.08505	5.17607	3.63064	4.2468	4.37931	3.4973	3.92561	4.68341	4.38028	4.78997	5.23782	3.51752	4.92949	4.15098	4.57086	3.12125	3.24311	4.67809	3.92554
SOST	5.62771	6.13158	3.73054	6.24496	4.70531	4.87873	4.32696	5.04648	4.8592	4.68423	1.92328	3.31415	5.33703	5.86908	4.44962	5.56735	5.68125	5.19015	4.78858	4.24687	5.89675	2.09185	6.14929	4.22093	5.75344	5.43087	3.08578	5.41856	2.87895	4.70191	5.52026	3.8469	5.02476	5.33808	5.40755	4.33629	5.92941	4.13991	6.05714	3.74254	4.83392	3.05002	2.00463	6.14038	4.29564	4.83533	6.12259	4.31603	3.92554
NTSR1	4.96178	4.47396	4.68516	3.01399	5.01565	3.87261	5.64784	3.76174	3.27328	6.2081	4.05421	3.31415	5.14123	4.06802	3	5.09261	4.79491	4.98138	4.28311	3.98257	2.02528	5.41557	4.75462	5.89915	4.63416	5.36898	3.55091	5.69134	5.317	4.01564	4.42858	4.482	3.82961	3.50842	4.82767	3.4973	5.05049	3.6726	5.42254	4.20586	4.14201	3.05002	3.53889	2.85306	3.69169	1.9512	1.95233	4.31603	5.58727
SLC5A4	4.83002	1.94309	2.98693	3.01399	3.61849	1.9685	5.0801	5.67411	3.75112	5.53838	3.93313	3.31415	4.62482	4.43104	3	5.06091	4.32503	3.72323	4.61986	3.78684	2.02528	2.09185	4.70912	4.68858	4.93635	3.64917	1.99235	4.40592	2.87895	3.74168	3.61807	5.04161	2.90638	3.50842	4.31651	3.03522	4.7724	2.9381	3.60463	3.74254	4.14201	3.05002	2.00463	1.90476	3.96772	3.12125	4.38278	3.30932	3.57564
SHH	4.08637	4.75542	5.19753	6.05383	3.3381	3.24255	3.49514	5.57231	3.55175	4.89808	2.8573	1.92734	3.60551	4.90233	3.94133	1.88175	6.10332	4.7098	5.43742	3.04216	2.02528	2.09185	4.75462	5.60329	3.02964	4.88548	1.99235	1.93755	4.39702	4.01564	4.50496	4.18931	6.04039	4.34202	5.69157	3.03522	4.22945	5.22026	4.07537	1.95988	4.39477	5.55322	4.01569	5.05824	1.91913	4.67375	1.95233	1.91031	3.77426
JAKMIP3	3.9665	5.51913	4.84135	5.94689	5.00117	4.77466	4.89546	5.66092	4.28736	5.01421	4.8724	4.38583	4.54577	5.79006	4.99533	5.84252	5.97354	5.29754	4.54537	5.40007	4.57012	4.05762	5.89419	4.46493	5.48851	4.97946	3.55091	4.22956	4.88876	4.64276	5.61583	3.8469	5.50925	4.77019	5.70554	3.97446	5.88516	3.39172	6.02746	4.5837	4.24029	4.55717	2.00463	6.07081	4.89619	5.77896	5.85477	4.85348	5.10663
CDH20	2.88546	5.06437	4.1916	5.36885	4.18777	3.24255	5.04994	3.13336	5.2162	4.56877	4.15409	2.8677	4.25854	3.44411	4.08826	4.73563	3.40036	4.18284	4.50308	3.78684	2.02528	2.09185	3.16844	5.14891	4.99468	3.64917	4.81569	3.96569	3.95832	4.77753	3.14209	2.00993	2.90638	5.03539	3.94271	3.03522	2.84719	2.9381	4.33188	4.20586	4.02267	5.28568	2.00463	3.93078	4.49546	5.35316	3.87339	5.07712	3.57564
ACSM5	3.33731	4.70003	3.92657	3.01399	4.2717	3.51959	4.84447	3.60751	4.02626	2.74558	4.15409	1.92734	4.82397	4.63686	4.76242	3.10641	4.529	4.47496	2.83132	3.98257	4.57012	2.09185	5.02567	4.29385	4.92566	1.94704	4.1739	3.77023	2.87895	4.11626	4.57048	3.10119	2.90638	4.13066	4.16123	4.65104	3.92561	2.9381	3.60463	3.89549	3.67499	4.83766	3.53889	4.05141	4.40564	5.25381	3.72024	5.16512	4.5977
AHSG	2.88546	4.98626	1.91915	5.22414	4.34408	2.81296	4.40684	4.72324	3.55175	3.79783	1.92328	3.31415	3.80398	4.43104	4.65429	4.04994	4.56103	5.52329	3.74808	4.7386	4.39818	2.09185	4.92758	1.90676	4.97624	3.64917	4.02692	4.8198	4.7523	2.822	5.3214	3.10119	2.90638	1.93815	4.48486	4.12249	4.8385	3.6726	4.46495	3.54301	5.2767	1.929	2.00463	5.15769	3.21438	4.86748	1.95233	2.86145	4.1458
CYP2C8	4.55386	1.94309	4.07439	3.01399	3.3381	4.43625	4.53545	3.98932	2.83619	4.60054	1.92328	3.59428	2.87605	3.44411	4.6935	3.58086	5.01005	4.09764	3.54873	1.96301	2.02528	2.09185	1.93492	3.28494	5.39268	1.94704	3.08578	3.96569	4.5032	4.60987	3.61807	4.40142	2.90638	4.80316	4.60833	4.93978	4.59623	3.39172	1.93243	3.26485	4.7805	3.99251	2.00463	3.30059	1.91913	4.97491	4.25929	4.37947	4.47277
TMPRSS11B	5.00669	6.10097	5.57887	4.1	1.93233	6.67275	3.77562	5.07372	4.77074	5.35276	6.16961	5.63888	3.32509	5.3919	5.81502	6.02831	5.90866	6.04897	6.1283	6.11197	5.75144	5.0089	5.34123	1.90676	4.73323	5.08083	3.08578	5.52311	6.26717	6.04645	5.2603	3.10119	5.8466	5.15258	4.67486	4.5486	3.92561	6.01827	6.32182	2.8303	6.11607	3.99251	5.14252	5.53176	5.98954	4.62168	5.4069	3.30932	6.24783
SULT1C2	4.89208	4.22772	3.73054	3.47352	3.3381	1.9685	3.49514	3.76174	1.95319	2.74558	4.05421	1.92734	4.1746	4.85667	4.79299	1.88175	3.59982	3.87538	2.83132	4.34285	3.66739	5.16865	5.70454	3.56486	3.49879	2.91775	3.08578	3.48943	2.87895	4.27495	5.76518	2.00993	3.35091	5.06852	1.88259	4.69469	3.29573	2.9381	2.71501	3.26485	2.93985	3.99251	3.07584	2.85306	1.91913	3.87218	5.02444	4.78727	4.1458
TM7SF4	3.9665	4.95605	4.4388	3.01399	4.85951	3.24255	4.58843	4.21998	4.28736	3.44434	4.23867	4.24944	5.23992	5.1223	5.5047	3.85914	4.71604	4.75868	1.9385	3.50591	2.02528	2.09185	6.04155	5.03707	4.05025	3.99806	3.08578	1.93755	3.60908	3.74168	5.53938	2.00993	4.42429	4.34202	4.52986	5.19524	4.6311	1.9462	2.71501	4.78997	4.14201	4.93993	3.07584	4.63772	1.91913	3.87218	5.14859	4.67809	4.04624
KIAA1239	3.33731	5.51348	3.73054	4.31511	4.0884	4.43625	5.03384	4.65265	2.83619	4.02474	3.93313	1.92734	4.82397	3.92061	5.59846	4.9204	4.45744	4.78109	3.54873	5.09146	5.04953	4.95615	5.02567	4.81392	3.30008	3.64917	3.83167	5.63278	4.86903	4.89637	4.33768	2.00993	3.82961	1.93815	5.30963	1.97323	4.55837	4.32138	4.33188	4.68418	4.85825	5.07103	3.07584	4.63772	4.49546	3.12125	3.24311	4.81057	4.04624
GAL3ST2	5.18923	3.76773	5.31106	3.01399	3.61849	4.97591	3.02787	5.05582	3.90389	4.25433	5.48372	2.8677	4.1746	4.99697	4.2046	4.30479	5.20814	5.04097	5.69442	3.78684	2.02528	3.57965	3.16844	2.83973	3.49879	4.49158	3.55091	3.48943	4.5485	5.34102	4.57048	5.52773	2.90638	4.13066	5.29342	3.4973	4.89509	5.72359	3.98721	3.26485	3.39408	5.26863	2.00463	4.99547	4.29564	3.59256	4.09827	3.78821	3.29543
PROK2	4.7287	4.04178	5.38359	1.97415	3.61849	2.81296	3.49514	4.07721	3.27328	5.4398	5.0166	3.94441	2.87605	4.7456	3.46539	5.83324	4.56103	5.90309	3.74808	5.39401	5.09368	5.22857	4.11194	4.41428	3.49879	4.66543	3.83167	3.48943	3.32862	5.6342	4.08505	5.65344	4.28729	4.13066	4.52986	1.97323	3.92561	4.77921	4.67883	4.98898	4.60686	1.929	4.28053	2.85306	5.82055	1.9512	3.52065	3.30932	4.55974
AMPD1	3.618	3.76773	4.89012	3.01399	4.40736	4.18486	5.75825	4.59828	6.13055	1.93246	5.11982	2.8677	3.95492	4.36154	4.50999	5.06091	3.40036	5.38484	3.74808	4.24687	2.02528	2.09185	5.15146	5.84167	3.02964	2.91775	5.19962	4.98613	4.33387	5.36784	5.59572	3.10119	4.53172	5.29271	5.27036	3.77828	4.79568	4.23828	3.13143	4.68418	3.67499	5.17845	3.07584	5.51096	5.39875	6.25315	4.56407	4.83259	5.20087
LOC152225	2.88546	4.04178	3.92657	4.1	4.67309	3.24255	5.22034	3.60751	4.6253	2.74558	5.1484	4.0653	4.54577	4.36154	4.61117	3.58086	1.91133	4.47496	4.0227	4.80795	4.79493	2.09185	3.64332	3.76371	3.02964	4.11812	3.55091	3.96569	5.26219	4.72866	4.22638	3.10119	4.20263	3.50842	3.79225	4.83523	4.92864	4.88	3.60463	4.11976	2.93985	3.79801	2.00463	3.93078	4.7417	4.76226	1.95233	4.78727	3.92554
CNKSR2	3.81606	4.70003	1.91915	5.5586	3.61849	1.9685	4.67864	5.62535	2.83619	3.44434	4.15409	4.24944	4.25854	4.36154	4.95879	4.98736	4.95488	5.56017	3.90057	3.98257	2.02528	2.09185	4.86705	4.59055	5.4978	3.99806	3.83167	5.30539	4.17783	3.89392	4.76395	2.00993	3.63064	3.04222	5.49211	4.23987	3.77455	1.9462	3.40523	3.89549	1.94433	4.96174	2.00463	5.34778	3.96772	3.12125	4.18462	5.24167	5.05333
CLEC4F	4.18513	4.3657	1.91915	3.01399	2.88928	2.81296	4.11644	4.07721	1.95319	2.74558	4.15409	3.31415	3.80398	3.92061	4.3805	3.58086	3.87835	3.87538	3.26987	1.96301	4.57012	5.55461	3.16844	4.65831	5.12786	1.94704	1.99235	3.48943	3.80745	4.95928	4.57048	2.00993	2.90638	5.01761	4.37931	3.77828	4.30188	3.39172	3.40523	5.01629	1.94433	5.28568	4.01569	3.58093	3.96772	3.59256	3.87339	4.15945	4.93113
MMP8	4.69896	5.10839	4.72147	4.94588	4.2717	3.99593	5.04994	3.88603	5.08004	4.79533	4.8914	5.51235	4.69189	4.28074	4.44962	5.0771	4.45744	4.09764	3.54873	3.98257	2.02528	4.89561	6.19075	4.81392	3.97281	4.88548	3.08578	3.77023	3.32862	3.26321	5.86328	4.04224	2.90638	4.34202	1.88259	1.97323	4.14547	3.39172	4.07537	3.54301	2.93985	3.51752	3.07584	3.30059	4.15578	1.9512	5.43665	4.85348	3.92554
GAS2L2	1.90756	4.04178	1.91915	1.97415	5.12497	4.18486	5.26483	4.50198	5.09096	4.49772	2.8573	1.92734	4.25854	5.14493	3.94133	4.04994	3.59982	3.52413	3.74808	1.96301	4.39818	2.09185	1.93492	3.28494	3.97281	4.88548	1.99235	3.96569	5.26219	5.22984	4.22638	4.04224	3.82961	4.65233	3.59417	5.02213	4.6311	1.9462	1.93243	3.26485	4.14201	3.79801	5.06027	5.26675	3.96772	3.59256	2.81055	4.53151	5.004
NTS	6.33736	6.0469	6.05949	6.4195	4.91892	6.68662	4.91866	6.29827	5.565	4.49772	6.38155	5.52361	3.32509	6.72714	6.85861	6.13708	7.00726	6.65942	6.36784	6.97947	2.02528	5.93127	5.54988	3.91532	6.56714	6.55027	3.83167	5.53384	6.10828	6.38588	6.76744	5.62857	6.73201	5.61367	5.5739	5.8788	5.94726	6.57719	6.5409	4.11976	6.8034	4.49728	6.96519	5.61865	5.60563	4.92492	6.66174	5.54623	5.26799
ROPN1B	1.90756	1.94309	4.07439	1.97415	4.81427	2.81296	4.63587	4.89726	1.95319	4.63024	4.23867	3.94441	3.80398	4.83164	4.93905	4.04994	4.21245	4.80231	4.0227	4.60769	2.02528	2.09185	3.92144	2.83973	5.44351	3.36863	1.99235	3.96569	4.90754	3.74168	4.57048	2.00993	3.63064	3.04222	4.24464	3.03522	4.30188	4.51092	4.38028	3.89549	2.93985	4.25416	3.81979	4.82478	3.96772	3.12125	1.95233	3.30932	3.77426
KLHDC7A	4.85182	4.22772	5.25115	4.98732	1.93233	4.25981	1.91018	5.34558	2.83619	3.44434	5.24327	4.74402	1.91747	5.60079	4.76242	4.89507	4.45744	5.60652	5.98012	4.24687	4.39818	5.0089	3.16844	4.46493	3.30008	3.64917	1.99235	5.28982	5.88054	5.06	4.50496	4.04224	5.18989	1.93815	5.09082	4.60266	5.14093	5.3361	4.8042	5.04173	4.56215	4.61014	4.45775	5.72134	5.14348	3.59256	1.95233	3.58965	4.99051
GTSF1	5.19742	4.47396	4.36901	3.95132	6.26048	3.24255	5.86221	5.41351	4.87859	5.14319	4.90951	1.92734	5.94039	4.06802	4.97752	5.92918	5.30244	4.4288	5.20085	4.9191	2.02528	6.34454	4.53461	6.09992	4.50573	5.69327	4.46645	5.87225	4.07861	4.82119	6.07643	3.10119	3.63064	5.38377	4.82767	3.77828	5.79697	5.59694	4.15171	6.25655	5.5602	4.55717	5.95265	4.05141	3.21438	3.12125	4.77139	5.64811	5.41062
RXRG	2.88546	4.04178	4.81454	3.47352	3.3381	2.81296	5.30384	4.15321	4.28736	5.20631	3.58274	2.8677	4.62482	3.44411	4.6935	4.1925	4.529	4.59107	3.26987	4.69913	2.02528	2.09185	3.16844	4.41428	4.11834	3.64917	4.46645	3.77023	2.87895	3.26321	4.83479	3.10119	3.63064	3.50842	4.98246	4.60266	4.6311	1.9462	4.21878	3.54301	3.39408	4.65749	2.00463	3.30059	5.31589	4.67375	3.72024	5.0295	3.77426
PSAPL1	5.5699	5.83624	5.73151	3.75463	5.55132	5.40995	4.9807	5.15856	5.27749	5.04606	4.31152	5.01202	5.81283	3.92061	3	4.89507	4.529	5.18296	4.28311	1.96301	5.16865	5.34484	5.31492	6.13698	3.77894	5.61906	3.55091	5.88122	4.80309	4.11626	4.80091	2.00993	4.10254	5.85084	4.90435	4.73439	5.23944	5.08262	3.75895	1.95988	5.42986	5.37827	3.07584	3.93078	5.14348	4.49539	4.25929	2.86145	5.1613
AQP7	3.81606	1.94309	4.84135	3.95132	3.3381	1.9685	4.8708	3.88603	4.28736	3.64387	5.09934	2.8677	2.87605	3.92061	4.2046	3.10641	3.12583	4.09764	4.76474	1.96301	4.39818	5.19987	1.93492	4.46493	3.30008	3.36863	3.83167	3.48943	4.07861	4.4475	4.42858	3.8469	2.90638	3.04222	3.94271	4.23987	1.89203	5.05566	1.93243	3.54301	3.87268	1.929	4.01569	3.58093	4.15578	5.26421	3.52065	5.15639	3.57564
FAM151A	4.75162	3.57312	5.35449	3.74991	5.56846	4.35442	3.81976	1.91687	5.05867	4.20801	5.44234	1.92734	4.48686	4.08848	6.22166	4.79152	4.87332	3.11179	5.24304	4.23306	5.8765	2.09185	1.93492	1.90676	5.27753	5.40019	1.99235	4.08908	4.29322	4.61631	1.88593	4.48569	5.51289	4.29846	4.26725	1.97323	4.42878	6.32356	4.93236	4.1094	5.71222	1.929	3.82429	4.41562	1.91913	3.44648	5.49223	5.69887	5.27707
TBX4	5.88218	5.8609	4.64555	3.47352	4.63822	5.22518	4.32696	5.36045	4.40984	4.02474	4.8314	4.96823	1.91747	4.77636	5.42887	4.69445	5.6087	4.32061	5.85104	5.00562	2.02528	2.09185	4.79564	4.29385	5.79931	4.11812	3.83167	5.10098	3.32862	5.43287	5.81763	3.8469	6.01113	3.50842	5.65958	4.93978	4.47164	5.31086	5.0863	4.97455	5.57395	5.52877	5.60606	5.44421	3.21438	5.16989	4.97143	3.30932	2.84807
SOAT2	1.90756	3.28928	4.36901	3.47352	3.96802	4.32554	4.58843	3.60751	4.12747	4.65807	3.30279	5.2154	1.91747	4.54543	4.97752	3.58086	1.91133	2.80323	4.76474	1.96301	4.57012	5.16865	3.16844	4.55237	3.6535	1.94704	3.55091	3.77023	4.45306	3.74168	3.14209	3.8469	3.63064	3.78903	3.31352	4.48753	3.57604	3.6726	2.71501	1.95988	3.87268	3.99251	5.04137	3.30059	3.21438	1.9512	3.24311	3.93938	4.42237
KRT33B	4.80697	4.56236	3.44953	3.01399	3.61849	4.60258	3.02787	4.33252	1.95319	4.56877	4.8914	5.05111	4.07535	3.72499	3.46539	4.30479	3.75402	2.80323	4.65295	4.12998	4.57012	5.34484	3.64332	1.90676	4.36883	4.3007	3.83167	5.61519	4.39702	5.18726	1.88593	2.00993	3.35091	3.78903	3.94271	1.97323	4.4214	1.9462	1.93243	4.01819	1.94433	4.55717	5.06027	2.85306	3.21438	1.9512	1.95233	3.58965	4.7233
KIR3DL2	5.0667	3.28928	3.92657	3.01399	4.0884	3.51959	4.3972	2.88064	3.55175	3.1688	4.29985	4.0653	3.32509	4.96194	4.3805	1.88175	2.70643	4.69398	2.83132	3.85839	2.02528	2.09185	4.11194	1.90676	3.22337	3.64917	4.59609	3.02487	4.07861	4.27495	4.70265	3.10119	1.97841	5.1766	3.94271	4.69469	3.48992	3.97922	1.93243	4.11976	1.94433	3.91443	2.00463	4.36098	3.21438	1.9512	3.87339	4.89216	4.94686
C1orf110	5.88154	3.76773	3.44953	5.89821	5.5565	6.20033	1.91018	4.3807	6.08124	3.44434	5.91836	4.88169	4.07535	6.05502	5.83847	5.40039	6.24247	5.43355	5.77481	5.33339	6.22745	4.63693	5.86798	1.90676	4.94672	6.17262	3.08578	3.96569	5.87182	6.20193	6.08684	3.56604	6.19804	4.5514	6.16395	6.17009	5.30416	6.39096	6.06051	3.54301	6.00803	6.21572	6.37022	5.59206	6.01147	6.20045	6.35478	4.43573	5.34763
CLUL1	4.26854	3.28928	4.55375	1.97415	1.93233	2.81296	1.91018	4.33252	2.83619	3.92182	3.58274	5.33543	2.87605	3.72499	4.50999	3.85914	3.40036	4.32061	5.26944	3.50591	3.66739	3.57965	3.16844	1.90676	5.27803	2.91775	1.99235	3.48943	5.20404	1.91419	3.14209	3.56604	3.35091	4.5514	4.06248	1.97323	3.57604	4.64607	4.53684	4.28019	2.93985	5.35264	3.81979	4.95184	3.21438	3.12125	5.5996	3.58965	1.90037
PGA3	4.55386	4.22772	4.75488	3.01399	3.81697	3.24255	3.49514	2.71364	3.27328	3.1688	2.8573	3.94441	4.84597	4.54543	3	4.83877	3.12583	2.80323	4.20921	3.50591	3.66739	2.09185	4.25413	4.55237	4.17888	5.05463	3.55091	4.75595	1.91666	2.822	1.88593	3.56604	1.97841	3.50842	4.31651	3.77828	4.55837	4.13991	3.60463	3.74254	3.87268	3.51752	4.01569	3.30059	4.40564	3.12125	3.52065	3.78821	1.90037
CLCA3P	3.33731	4.04178	4.49978	4.39697	3.96802	5.56677	3.77562	4.33252	3.75112	3.1688	4.94333	3.94441	3.80398	4.7456	5.47906	4.83877	3.75402	4.78109	5.43382	4.34285	4.39818	5.13456	1.93492	2.83973	3.30008	5.14952	1.99235	4.96633	5.66189	4.86058	3.14209	4.04224	3.35091	4.2468	3.59417	5.48382	3.29573	5.26871	4.15171	5.01629	5.28393	6.03426	4.87398	3.93078	5.07177	3.59256	4.89272	5.07712	4.63268
PTCHD2	5.38251	4.47396	4.55375	5.18107	4.83753	5.70802	4.81626	3.60751	5.53768	5.61899	4.97441	5.5693	4.77609	3.92061	3	1.88175	2.70643	4.25629	3.54873	3.78684	5.20097	5.16865	4.25413	5.18967	4.78303	5.12808	6.14254	3.77023	4.92543	5.74671	4.33768	4.99867	5.00952	5.73589	4.57081	4.73439	4.72147	5.42952	3.13143	5.80253	4.51261	5.02047	2.00463	4.3077	4.82633	3.59256	3.99637	4.31603	5.38288
OLAH	4.59484	1.94309	5.39416	3.01399	3.3381	3.24255	1.91018	3.60751	3.27328	3.44434	4.31152	4.68564	4.62482	4.06802	3.94133	3.85914	5.02015	3.24469	4.45659	5.5008	2.02528	2.09185	3.92144	4.97161	1.89017	2.91775	4.02692	5.03987	3.60908	2.822	1.88593	5.35657	3.82961	1.93815	3.59417	1.97323	1.89203	5.34212	3.75895	4.01819	5.40185	3.05002	4.28053	2.85306	3.21438	3.12125	2.81055	1.91031	4.51832
CHST9	4.87248	4.70003	5.74313	5.31237	1.93233	4.98994	1.91018	5.75856	3.90389	3.1688	5.82094	6.3933	1.91747	6.19169	5.96058	5.61565	5.04886	6.06744	6.06293	5.76534	2.02528	2.09185	4.45767	3.28494	5.84952	2.91775	1.99235	5.73732	6.27755	5.93632	4.89477	4.04224	5.60872	5.61635	5.77007	5.70683	5.85661	5.48977	5.62823	5.60195	5.19375	5.34587	5.1841	6.16614	5.72949	1.9512	1.95233	3.30932	5.52944
IYD	3.618	5.22929	4.64555	3.47352	1.93233	5.26539	3.02787	5.22631	2.83619	3.44434	4.37535	3.59428	2.87605	4.7456	3.94133	5.25657	4.45744	4.89415	4.92499	5.0595	3.66739	2.09185	3.64332	3.76371	4.93635	5.04077	3.83167	5.42374	5.40807	5.00036	4.97006	3.10119	4.81069	5.24921	4.64285	3.77828	4.14547	4.45549	4.8042	1.95988	2.93985	4.55717	2.00463	4.3712	4.15578	4.06497	4.18462	3.93938	4.55974
SPINK2	2.88546	4.22772	2.98693	1.97415	3.96802	1.9685	4.32696	3.88603	4.68941	4.79533	5.59887	5.52361	4.84597	3.72499	4.6935	4.1925	4.45744	5.02979	4.0227	3.78684	2.02528	2.09185	4.11194	3.28494	4.32756	3.84738	3.55091	1.93755	5.05671	3.74168	5.35857	2.00993	3.82961	3.78903	4.37931	4.91611	4.4214	1.9462	5.04059	3.26485	1.94433	3.79801	3.07584	4.75464	4.40564	3.12125	5.44018	4.67809	5.08626
BPIL2	3.33731	5.64302	5.68229	3.95132	5.57147	5.46445	5.72559	2.71364	4.8592	4.99133	5.63325	4.58003	6.14416	4.36154	4.61117	5.62828	3.12583	4.32061	4.20921	4.77472	5.67809	5.87208	5.49558	5.31006	3.30008	5.62772	4.02692	6.19792	5.6432	4.01564	4.22638	2.00993	4.81069	3.04222	4.95318	3.77828	5.45201	4.85705	5.32725	5.51782	6.28696	3.05002	2.00463	4.15098	3.21438	4.41686	4.60029	5.28619	4.77438
SERPINB12	5.03381	5.94235	3.44953	5.28832	2.88928	4.94614	5.46476	4.07721	2.83619	3.92182	3.58274	4.61807	3.80398	5.07203	5.70434	5.39461	5.90739	5.7542	5.60337	5.80192	5.34883	2.09185	5.18038	2.83973	5.87797	4.21709	1.99235	6.28429	4.95888	5.0915	5.31337	3.10119	5.35664	6.26708	4.90435	3.77828	4.72147	5.37053	5.25802	5.04173	5.33048	6.35359	5.00044	4.05141	4.7417	4.86748	4.4819	5.40311	3.77426
C2orf71	3.33731	4.95605	4.72147	5.02468	1.93233	4.98994	4.11644	5.12255	4.28736	1.93246	5.20699	4.61807	1.91747	5.15568	5.30588	4.3966	5.28928	4.75868	4.0227	5.18494	4.39818	2.09185	5.13605	4.35767	5.27803	5.08083	1.99235	3.96569	4.5485	4.01564	5.54667	3.8469	5.09278	3.78903	5.21134	4.33629	3.29573	5.02652	5.09477	4.11976	5.1642	4.25416	2.00463	4.88442	3.96772	4.86748	5.25289	4.05996	3.77426
CGB	3.618	4.9233	4.68516	4.21806	5.87385	1.9685	5.01699	4.72324	4.94785	5.93024	3.30279	3.59428	4.65965	3.44411	1.9036	4.1925	3.40036	4.62394	2.83132	1.96301	5.10068	3.57965	1.93492	5.34487	4.63416	4.66543	4.81569	1.93755	4.84823	3.54254	4.97006	2.00993	3.82961	4.13066	3.59417	4.65104	4.04609	2.9381	4.2784	5.40629	3.88612	1.929	3.53889	4.05141	4.95535	5.6255	3.69192	4.57293	4.51832
KIAA1486	4.08637	4.22772	4.36901	3.01399	3.3381	1.9685	4.11644	3.98932	4.8592	3.64387	3.30279	1.92734	4.07535	2.98019	4.61117	5.06091	3.98165	4.78109	4.54537	3.04216	2.02528	2.09185	4.45767	4.22093	5.67434	4.43571	3.08578	3.48943	4.5032	5.13838	3.89542	3.10119	2.90638	3.50842	4.24464	3.03522	4.22945	4.80685	4.15171	3.74254	2.93985	1.929	3.53889	3.77951	4.29564	4.20942	1.95233	4.53151	3.77426
SLC7A9	2.88546	3.28928	4.07439	1.97415	1.93233	4.52667	3.49514	4.53638	3.90389	5.01421	3.78158	3.79302	2.87605	4.67628	3.74614	3.10641	4.2718	2.80323	3.26987	1.96301	2.02528	2.09185	1.93492	3.76371	5.50323	2.91775	3.83167	3.48943	3.80745	3.54254	4.22638	3.10119	3.63064	4.97929	4.37931	4.12249	4.95946	2.9381	3.88357	2.8303	3.67499	3.05002	3.07584	3.93078	1.91913	4.49539	2.81055	2.86145	3.29543
KLHL4	3.33731	4.75542	3.44953	4.1	4.2717	3.71919	5.36364	3.40816	5.37319	5.11925	4.48257	4.38583	5.27991	4.71236	4.30003	4.30479	4.73719	4.65449	3.74808	4.60769	2.02528	2.09185	4.25413	5.04885	4.11834	5.52233	4.74051	4.8198	4.62745	4.11626	4.83479	4.18931	1.97841	4.2468	5.00956	3.03522	4.14547	2.9381	5.92536	6.04956	4.14201	3.51752	3.07584	5.33319	5.64415	4.32348	6.04545	4.78727	5.43595
DLEC1	6.01694	5.16552	5.49418	4.58348	4.2717	4.38393	4.2321	6.02017	2.83619	4.1879	4.52834	4.0653	3.95492	5.55468	5.35662	5.44759	6.36905	4.87743	5.10448	4.77472	3.66739	2.09185	4.97983	4.35767	4.81313	4.78986	3.55091	4.11291	5.48717	5.50792	6.26727	3.8469	3.35091	4.6953	6.11024	4.5486	4.87713	3.6726	5.24216	3.89549	4.24029	4.13858	5.71738	5.63781	4.15578	5.22038	3.24311	4.87331	5.16961
FOXE3	4.40331	3.28928	2.98693	3.01399	5.00117	2.81296	3.49514	2.71364	5.00648	5.23683	1.92328	2.8677	4.1746	1.89913	3.74614	4.47376	3.87835	4.47496	3.54873	1.96301	2.02528	2.09185	3.16844	5.23278	3.6535	4.66543	3.08578	1.93755	5.51123	3.74168	4.22638	3.56604	2.90638	1.93815	5.31998	4.41758	5.03881	3.39172	2.71501	4.11976	4.39477	3.51752	3.07584	2.85306	3.69169	3.12125	4.83658	3.30932	3.57564
ELAVL2	5.62957	4.22772	5.12151	5.20327	3.61849	5.64492	5.45612	4.86801	5.86185	5.57803	5.96087	5.50655	5.6331	4.28074	4.2046	4.94408	4.37322	4.37771	5.85322	4.55397	5.98277	5.58365	4.70912	5.66045	3.88359	3.84738	6.31409	5.61778	6.02356	5.5691	4.08505	5.99399	6.01474	5.32366	4.16123	6.09723	5.28214	4.02043	5.78259	5.96765	6.19819	3.05002	3.07584	4.90241	5.87931	4.32348	3.87339	1.91031	5.39905
PIK3C2G	4.459	4.22772	3.73054	3.75463	3.61849	4.91388	4.53545	3.40816	3.55175	4.02474	6.07226	5.40128	3.32509	5.18604	1.9036	4.59777	3.12583	4.78109	5.038	5.56867	2.02528	2.09185	3.92144	1.90676	5.58597	4.49158	5.95309	5.65381	4.92543	4.20142	5.29668	5.75974	5.35094	1.93815	5.37557	5.41772	4.36524	4.13991	5.54992	5.5471	2.93985	3.99251	5.55054	4.15098	5.21597	5.01908	5.0366	5.09871	5.31821
TEKT4	2.88546	3.28928	3.73054	3.95132	5.19121	1.9685	1.91018	4.8196	3.75112	3.79783	3.93313	4.998	4.50041	4.83164	4.94964	4.83877	3.75402	3.99712	3.54873	4.49323	4.87504	3.57965	3.92144	5.11228	4.40689	3.64917	3.55091	4.98613	4.66224	5.03729	4.22638	2.00993	1.97841	4.2468	3.59417	3.03522	4.89929	3.39172	3.40523	4.01819	4.32329	3.51752	5.1841	4.75464	3.69169	4.06497	3.87339	3.78821	4.30254
PVALB	3.9665	4.04178	4.49978	3.95132	3.81697	3.51959	4.2321	3.13336	3.27328	3.64387	2.8573	3.79302	4.50041	3.72499	4.61117	4.47376	4.45744	4.09764	4.92499	3.04216	2.02528	2.09185	4.83293	5.70959	4.5871	3.64917	5.2352	3.02487	2.87895	4.20142	5.25053	2.00993	1.97841	3.78903	5.35365	5.36841	2.84719	2.9381	5.17644	3.54301	3.39408	4.42873	4.16341	4.67012	5.7399	4.89726	4.32473	4.31603	4.51832
COL19A1	2.88546	1.94309	4.07439	3.01399	2.88928	3.71919	5.09427	3.76174	5.15027	3.1688	4.48257	3.31415	3.80398	4.06802	1.9036	4.64881	3.59982	3.52413	3.26987	3.98257	4.39818	2.09185	3.92144	5.25864	4.94672	3.36863	4.59609	4.11291	3.32862	4.39636	4.50496	3.8469	1.97841	5.98778	4.16123	1.97323	3.57604	1.9462	1.93243	2.8303	2.93985	4.13858	3.07584	4.15098	4.29564	5.3453	4.18462	5.58258	5.35228
TEX101	4.69896	5.22929	3.44953	1.97415	4.2717	5.62506	3.49514	4.96193	4.21328	3.44434	4.56999	5.05111	4.1746	4.88017	5.12514	4.96636	3.59982	4.18284	5.11444	4.80795	6.02559	5.54429	1.93492	1.90676	4.73323	2.91775	1.99235	5.08667	4.80309	5.34565	4.33768	2.00993	1.97841	5.20969	4.06248	5.17167	4.04609	4.51092	5.14895	1.95988	1.94433	3.05002	4.28053	4.3712	4.15578	4.99765	5.48545	4.67809	4.63268
TSPAN8	3.33731	5.73939	5.73882	1.97415	3.3381	4.52667	4.11644	5.37806	4.81733	3.1688	5.63325	5.76845	4.25854	5.60546	4.91824	4.53998	4.529	5.85075	5.77683	4.60769	5.20097	4.63693	1.93492	4.59055	5.12786	4.58669	3.08578	5.49231	6.08837	4.70191	4.57048	3.56604	5.24216	5.69999	4.95318	3.4973	4.51706	5.91093	3.88357	5.50636	5.49003	6.04077	5.58151	5.8481	5.05131	4.62168	2.81055	4.64575	5.28566
ABCA17P	4.63238	4.95605	3.44953	4.84698	2.88928	3.24255	3.97022	4.15321	4.79468	4.45773	1.92328	4.74402	3.95492	4.63686	3.94133	4.59777	4.14564	4.18284	2.83132	3.98257	2.02528	2.09185	3.92144	4.35767	4.96666	3.84738	3.55091	1.93755	5.7777	2.822	4.57048	3.8469	3.35091	5.7057	3.59417	3.03522	4.59623	2.9381	5.09477	3.54301	4.02267	4.42873	2.00463	4.82478	1.91913	4.76226	3.24311	3.93938	4.36608
CIDEA	4.75648	4.84805	4.81454	4.92338	4.18777	4.38393	3.49514	1.91687	5.2162	3.79783	3.30279	3.59428	4.65965	4.18488	3.74614	5.13522	3.12583	5.04097	4.87215	1.96301	4.79493	6.53924	3.16844	5.30473	4.11834	4.96243	1.99235	5.75447	2.87895	2.822	4.50496	2.00993	3.63064	1.93815	4.82767	3.77828	1.89203	4.90166	5.23671	4.20586	4.64757	1.929	4.95461	4.05141	4.29564	5.1264	3.52065	5.09871	3.92554
MYL3	3.33731	4.6365	3.92657	3.75463	4.40736	1.9685	6.0845	3.60751	5.06876	4.02474	4.15409	4.24944	4.62482	3.72499	3.74614	3.58086	1.91133	4.73495	4.0227	3.04216	3.66739	2.09185	4.25413	5.49877	4.69633	3.36863	5.11522	4.47524	1.91666	3.74168	1.88593	3.8469	1.97841	3.98401	3.59417	1.97323	4.47164	1.9462	4.07537	2.8303	1.94433	3.51752	3.07584	4.56482	5.84007	6.20679	4.66506	4.61084	4.04624
STAB2	4.69896	3.28928	2.98693	3.47352	1.93233	2.81296	3.49514	3.76174	4.12747	2.74558	4.31152	5.16597	4.1746	4.59347	5.13697	4.9204	3.12583	4.85995	4.83253	1.96301	2.02528	2.09185	3.64332	4.92589	5.82051	3.64917	1.99235	1.93755	4.17783	4.49371	4.83479	4.18931	4.61935	4.13066	4.52986	3.03522	5.07272	2.9381	4.56907	4.54455	1.94433	1.929	3.07584	4.56482	4.40564	4.56284	4.85618	5.30348	5.15278
GRIK2	4.50883	4.3657	2.98693	5.72181	3.61849	3.24255	4.11644	5.46868	4.50808	3.79783	5.82427	5.44809	4.07535	4.54543	1.9036	4.59777	2.70643	5.32648	5.02563	3.04216	2.02528	2.09185	3.92144	4.13635	5.06758	1.94704	4.29036	3.77023	5.46428	3.26321	4.50496	4.66523	1.97841	4.34202	3.94271	3.4973	3.77455	1.9462	5.02054	4.40322	4.56215	4.65749	4.90272	4.67012	4.57086	3.12125	2.81055	1.91031	4.36608
KRT37	4.05415	4.04178	2.98693	1.97415	1.93233	1.9685	3.86497	3.13683	3.85453	4.55267	3.58274	1.92734	4.36536	3.5735	3	4.26381	3.82543	3.42755	1.9385	3.78684	5.20769	5.13456	3.88195	3.20987	3.99317	3.64917	1.99235	6.13143	5.89648	3.26321	3.14209	2.00993	4.35759	3.50842	4.50472	3.97446	3.76773	2.9381	3.13143	4.36222	3.67265	3.05002	3.53889	1.90476	3.21438	4.26607	2.81055	4.58924	3.63546
ZNF732	3.618	3.28928	4.81454	1.97415	1.93233	5.21064	3.49514	2.71364	4.91474	4.25433	3.30279	3.79302	3.32509	5.29219	4.91824	4.77301	5.23042	4.25629	4.73941	3.04216	2.02528	2.09185	3.64332	3.28494	3.6535	4.3007	1.99235	3.02487	4.7523	3.54254	1.88593	5.30339	4.95968	3.78903	5.34906	3.4973	3.57604	3.39172	3.60463	1.95988	2.93985	4.61014	2.00463	4.05141	1.91913	3.12125	1.95233	3.78821	4.93113
C3orf15	4.85182	1.94309	3.44953	3.47352	3.61849	2.81296	3.02787	4.80206	3.27328	2.74558	4.67585	4.9834	3.32509	5.07203	5.28447	4.64881	4.71604	5.11931	4.87215	4.77472	2.02528	2.09185	4.36611	2.83973	5.32791	3.84738	3.83167	4.40592	5.39107	5.34565	5.06871	2.00993	3.63064	5.60547	4.57081	4.23987	5.44551	4.02043	3.40523	4.01819	4.32329	4.25416	5.35484	5.35249	4.29564	3.59256	3.52065	4.61084	5.39509
ACTA1	4.08637	3.28928	5.93973	5.35565	6.0044	5.45773	6.5914	4.56837	6.75821	4.86672	3.78158	4.95244	5.93838	4.36154	3.74614	5.19604	4.06954	5.87262	4.0227	4.34285	4.13978	2.09185	4.36611	6.68929	4.63416	4.62781	6.59041	4.32529	4.07861	5.63256	4.22638	4.18931	3.98136	3.50842	4.67486	4.12249	3.92561	4.60531	3.40523	4.20586	4.60686	4.25416	3.53889	5.67518	6.58125	7.02031	6.19813	5.35025	5.25566
ODZ1	5.07096	4.98626	5.10911	3.95132	5.83558	4.18486	5.91513	5.68996	4.68941	4.91289	4.56999	4.8408	5.55013	4.59347	4.3805	6.07886	5.28928	5.31712	3.74808	3.98257	2.02528	5.36399	4.70912	5.8986	5.58859	4.49158	3.08578	5.21871	4.5485	5.13838	5.87197	3.56604	1.97841	4.34202	5.46252	3.77828	5.10363	2.9381	3.88357	2.8303	6.12324	4.77463	5.46563	4.80273	4.82633	4.49539	4.66506	4.98913	5.01696
GDF10	2.88546	5.47043	4.07439	3.75463	4.0884	2.81296	4.67864	5.19107	3.55175	3.1688	4.97441	4.32213	4.1746	4.80498	4.08826	5.22774	5.41582	5.35289	3.54873	3.78684	2.02528	2.09185	3.92144	4.74337	4.82737	2.91775	3.08578	4.89991	5.08038	4.11626	5.19641	2.00993	4.72545	4.13066	5.10103	4.12249	5.19762	3.6726	4.15171	4.65311	3.67499	5.02047	2.00463	5.12127	3.69169	4.20942	3.24311	4.64575	5.14404
CRHBP	3.618	4.75542	4.28787	3.01399	4.40736	3.24255	4.2321	3.13336	3.27328	2.74558	4.60814	2.8677	3.95492	4.54543	5.23668	4.77301	5.15167	4.80231	3.54873	5.63909	2.02528	2.09185	4.8985	3.91532	4.65592	2.91775	4.29036	4.75595	3.80745	2.822	4.89477	2.00993	5.03939	4.42223	5.14791	4.23987	3.92561	4.23828	4.82183	3.26485	5.20303	4.13858	3.53889	3.30059	3.96772	1.9512	3.52065	4.48606	4.51832
MYO3A	5.81445	5.71115	5.40435	3.75463	5.17359	5.32824	5.14575	4.65265	3.55175	4.73225	5.75475	2.8677	4.9404	3.72499	5.88377	5.52334	4.14564	4.51703	5.14274	4.4237	2.02528	2.09185	5.74454	5.92015	6.08799	5.67792	3.08578	4.22956	5.48401	5.82419	5.30514	6.0104	6.15297	4.73441	5.65958	5.0574	4.98788	5.70796	5.6194	1.95988	5.69475	5.84054	5.30405	4.93608	4.6919	5.23192	6.14587	4.73622	5.08626
HESRG	6.28201	4.3657	4.81454	3.95132	3.81697	4.48355	4.8708	6.19036	4.65855	4.11223	6.26759	1.92734	4.25854	4.59347	4.61117	5.02602	6.21477	4.18284	4.34776	4.89408	4.13978	2.09185	5.04658	6.37672	4.32756	6.29112	4.64953	6.16686	4.2616	5.82871	6.33459	2.00993	5.55042	3.04222	6.09	3.4973	5.48251	4.02043	5.49683	3.74254	6.12598	3.51752	5.32187	6.17298	4.29564	3.87218	6.16164	4.64575	4.04624
DSG4	5.77389	6.10336	3.44953	5.6138	3.3381	5.19541	4.32696	5.00664	3.75112	1.93246	4.43191	3.94441	4.25854	4.83164	4.82145	4.64881	6.46848	5.12795	4.34776	5.77616	2.02528	2.09185	5.8331	3.28494	4.47504	3.36863	1.99235	5.49231	3.95832	4.53581	1.88593	5.02074	5.40864	4.42223	4.99629	3.03522	3.92561	2.9381	4.83875	3.89549	4.02267	1.929	4.28053	4.7283	1.91913	4.72029	4.56407	4.05996	5.61924
KLRC3	2.88546	1.94309	3.47674	1.97415	4.55998	1.9685	4.41637	4.05817	1.95319	3.79783	4.23786	4.03389	4.53397	3.72499	5.0171	3.58086	3.6579	3.98036	2.83132	1.96301	4.39818	2.09185	3.64332	2.83973	3.85305	3.52264	4.38593	3.77023	3.43378	4.74517	4.77427	3.10119	1.97841	4.60468	4.06248	4.26466	4.30188	4.36482	1.93243	1.95988	1.94433	4.39284	4.37669	4.20388	3.21438	1.9512	3.52065	4.37947	4.54076
AMY1A	4.69896	4.04178	4.602	3.01399	3.3381	5.63786	3.02787	4.15321	4.21328	2.74558	5.26327	4.58003	5.43424	4.28074	4.2046	3.10641	4.14564	2.80323	4.68374	3.04216	3.66739	4.82494	4.36611	3.76371	4.44216	3.36863	1.99235	5.78153	4.5032	4.64276	3.89542	4.61172	4.42429	6.04739	3.59417	1.97323	2.84719	3.6726	3.13143	2.8303	4.32329	1.929	4.64224	4.96695	3.69169	3.12125	1.95233	3.30932	6.16026
SLC22A11	5.45029	4.84805	5.24281	1.97415	2.88928	4.7245	3.49514	4.701	2.83619	4.45773	4.37535	1.92734	1.91747	4.7456	4.3805	3.58086	5.1964	3.87538	5.2084	3.78684	2.02528	2.09185	3.16844	4.51069	3.49879	5.55201	3.08578	3.48943	3.32862	5.43968	4.92159	3.56604	4.81069	4.2468	4.16123	3.4973	3.29573	5.77534	3.13143	2.8303	5.04228	4.80738	4.95461	4.3712	3.21438	3.12125	3.72024	2.86145	2.84807
FCRL2	3.9665	4.47396	5.02389	5.02468	1.93233	2.81296	3.77562	4.62629	2.83619	3.79783	5.02966	3.59428	3.32509	5.08531	4.30003	5.2994	4.529	4.51703	3.26987	4.83875	3.66739	2.09185	4.95458	3.28494	3.49879	2.91775	4.46645	4.68059	4.86903	5.29578	5.82122	2.00993	4.78415	5.46769	5.0583	3.4973	5.32469	5.30421	1.93243	4.89292	3.39408	5.11531	4.28053	4.96695	3.96772	1.9512	4.72151	5.84111	5.85769
TMEM195	5.059	3.28928	3.44953	3.01399	3.3381	2.81296	4.63587	5.09899	3.55175	4.65807	3.30279	4.65317	3.80398	4.28074	4.65429	4.30479	3.12583	4.37771	2.83132	3.98257	3.66739	2.09185	1.93492	3.91532	5.76271	4.21709	4.29036	3.02487	3.60908	3.74168	1.88593	3.8469	1.97841	3.50842	5.53611	1.97323	3.77455	2.9381	3.13143	5.54962	2.93985	5.35924	3.53889	1.90476	3.69169	3.12125	4.60029	4.43573	4.51832
CDK5R2	5.17216	1.94309	2.98693	5.4579	5.06839	2.81296	1.91018	3.40816	2.83619	5.84488	3.78158	4.88169	4.84597	1.89913	3.74614	4.3966	1.91133	4.47496	3.54873	1.96301	2.02528	2.09185	1.93492	3.28494	4.17888	4.43571	1.99235	3.02487	4.17783	3.26321	1.88593	2.00993	3.63064	1.93815	4.67486	3.4973	4.8385	4.23828	2.71501	5.27533	3.39408	4.83766	4.01569	3.58093	3.96772	3.87218	1.95233	3.58965	3.29543
GDNF	3.618	4.04178	3.73054	3.95132	2.88928	3.71919	4.40684	3.13336	2.83619	4.53459	4.76086	4.16509	3.60551	4.54543	4.79299	3.10641	3.59982	4.18284	3.74808	5.00562	3.66739	2.09185	4.36611	3.91532	4.6766	4.54154	3.55091	4.47524	4.5485	2.822	3.14209	3.10119	5.18989	1.93815	4.43501	3.77828	4.4214	2.9381	5.20795	2.8303	1.94433	1.929	3.07584	4.60275	4.15578	3.59256	2.81055	3.30932	3.29543
NRK	5.00669	5.16552	3.73054	4.39697	4.40736	1.9685	5.59515	5.69215	4.55051	2.74558	4.52834	5.16597	5.47945	5.46241	5.51836	4.80726	4.77657	5.52562	2.83132	4.4237	2.02528	2.09185	5.31492	5.67223	5.56542	3.84738	4.84878	3.02487	5.09164	4.53581	5.63953	2.00993	2.90638	4.2468	5.93316	1.97323	4.59623	3.39172	5.71557	3.54301	3.87268	4.42873	2.00463	5.77983	4.7862	4.62168	5.19731	4.95949	4.04624
ERBB4	4.34041	4.3657	5.08294	3.95132	2.88928	3.87261	5.45167	4.85252	5.51029	3.44434	5.22925	4.0653	2.87605	4.67628	4.30003	4.1925	2.70643	5.31712	4.85284	3.98257	2.02528	4.05762	3.64332	4.97161	4.40689	3.36863	4.38593	3.77023	5.34884	4.20142	3.89542	2.00993	4.85917	3.04222	4.24464	3.97446	3.29573	4.56054	1.93243	4.74035	3.87268	4.13858	4.01569	5.63272	5.10946	5.59708	3.87339	3.30932	3.77426
KRTAP5-1	5.20543	3.76773	2.98693	3.01399	3.61849	4.09811	3.02787	4.85252	2.83619	3.1688	3.58274	2.8677	1.91747	4.06802	3.46539	4.3966	4.37322	3.87538	2.83132	4.83875	3.66739	2.09185	1.93492	3.56486	3.77894	2.91775	3.08578	1.93755	4.5032	4.57434	5.10154	4.71307	4.28729	3.50842	4.70458	3.4973	4.30188	4.39294	2.71501	1.95988	4.02267	4.34892	2.00463	3.30059	3.69169	1.9512	4.32473	3.58965	3.57564
MAFA	4.26854	4.6365	4.07439	3.75463	4.63822	3.24255	5.20069	4.8829	4.71826	5.50441	4.23867	4.95244	3.95492	4.28074	4.56339	3.85914	4.41717	4.68308	3.26987	4.49323	2.02528	2.09185	1.93492	4.79175	3.30008	4.11812	3.83167	1.93755	2.87895	3.74168	3.89542	5.23989	3.98136	3.04222	4.31651	3.03522	4.47164	4.60531	4.72491	1.95988	3.39408	1.929	4.16341	3.30059	4.89619	5.20845	4.09827	3.30932	1.90037
LBP	3.81606	3.28928	5.2071	5.47655	4.40736	3.71919	5.3251	1.91687	5.31272	4.25433	5.38035	4.77044	3.95492	4.54543	5.70107	5.70796	4.64538	4.87743	4.58416	4.12998	2.02528	2.09185	4.79564	4.90936	3.97281	3.64917	5.02562	4.94546	2.87895	4.4475	5.7755	4.61172	1.97841	1.93815	4.84832	1.97323	4.95946	5.20237	1.93243	4.83432	4.51261	3.99251	3.07584	5.53176	5.70257	5.40308	4.25929	5.86112	5.25566
CARD18	3.81606	5.42764	5.66349	4.46744	5.43662	2.81296	4.63587	5.22068	4.94785	3.64387	4.52834	1.92734	5.49812	4.43104	5.44226	4.59777	5.61879	4.78109	3.54873	4.77472	5.99915	5.93374	5.69286	5.90937	4.5871	4.762	1.99235	5.97886	5.19598	1.91419	4.89477	2.00993	4.97704	1.93815	4.93761	3.4973	5.49384	4.9222	4.94038	4.89292	5.43865	1.929	5.3131	4.75464	4.15578	3.59256	4.32473	4.64575	3.29543
C4orf26	4.40331	4.75542	1.91915	1.97415	5.28093	3.51959	4.2321	3.98932	4.7453	4.99133	4.05421	3.31415	3.32509	1.89913	4.08826	4.04994	1.91133	5.27663	2.83132	3.50591	4.79493	2.09185	4.25413	4.94179	4.40689	5.02637	3.55091	3.96569	3.60908	2.822	4.08505	2.00993	2.90638	3.04222	4.16123	3.4973	3.57604	1.9462	4.8042	5.24252	3.67499	3.05002	3.53889	4.05141	3.96772	3.59256	1.95233	3.30932	4.23001
SHISA9	5.5483	4.22772	5.37265	3.75463	2.88928	1.9685	1.91018	3.88603	3.75112	2.74558	2.8573	4.49279	3.80398	5.61894	5.37913	3.85914	4.21245	4.32061	5.2084	3.50591	3.66739	2.09185	3.64332	4.89204	3.97281	1.94704	3.08578	3.02487	5.13339	3.89392	5.81029	2.00993	4.48094	1.93815	5.40755	1.97323	3.92561	3.87038	3.75895	2.8303	3.67499	3.05002	3.53889	5.99801	4.15578	3.87218	4.43482	3.93938	4.04624
IZUMO1	4.78251	3.76773	2.98693	3.01399	2.88928	4.7245	3.49514	4.42459	1.95319	4.25433	4.48257	4.16509	3.60551	3.44411	3.74614	4.53998	3.12583	3.24469	1.9385	4.4237	2.02528	2.09185	3.92144	2.83973	5.03699	2.91775	3.08578	3.02487	4.07861	4.20142	4.67812	3.8469	4.28729	4.5514	1.88259	3.77828	3.77455	4.60531	4.15171	2.8303	5.10851	1.929	3.81979	3.30059	1.91913	3.12125	3.24311	2.86145	5.22943
FMN2	4.08637	1.94309	3.92657	3.47352	2.88928	3.71919	3.49514	4.53638	3.27328	5.65029	4.05421	3.79302	4.25854	4.28074	3.94133	4.86794	4.37322	4.68308	4.0227	1.96301	3.66739	3.57965	3.64332	5.49317	4.76709	1.94704	4.02692	4.22956	4.86903	4.01564	5.06871	3.10119	1.97841	3.50842	4.43501	1.97323	5.25222	3.39172	2.71501	1.95988	3.39408	4.55717	2.00463	4.3712	3.21438	3.87218	4.4819	4.53151	4.23001
FLG2	3.9665	5.63944	5.43297	3.95132	3.3381	4.9613	5.73647	4.85252	4.46142	3.92182	5.17478	3.79302	5.00201	5.33729	4.65429	5.13522	5.02999	5.35289	4.71246	4.55397	5.53696	5.13456	5.04658	3.76371	4.5871	4.43571	3.08578	6.63917	5.45032	5.25543	4.67812	3.8469	4.92248	3.04222	5.30431	1.97323	3.57604	5.32998	5.80847	4.34536	5.07025	4.25416	2.00463	5.24768	1.91913	5.03934	4.74718	5.80567	4.7233
SRD5A2	1.90756	3.28928	3.92657	1.97415	4.0884	3.71919	3.77562	4.21998	3.55175	4.79533	3.78158	4.49279	2.87605	5.07203	5.50817	4.30479	3.59982	4.59107	3.74808	1.96301	3.66739	5.3821	3.92144	5.07129	3.49879	3.36863	1.99235	3.96569	4.6944	4.94449	4.72322	2.00993	3.98136	3.04222	4.73239	3.77828	2.84719	2.9381	3.13143	3.54301	3.67499	4.49728	3.07584	5.19822	4.15578	3.59256	1.95233	3.30932	4.69518
CLDN6	5.08254	4.22772	4.84135	3.01399	4.40736	3.24255	3.77562	3.60751	3.90389	4.11223	5.40576	4.38583	3.32509	3.44411	3.94133	4.04994	1.91133	4.25629	5.67561	3.04216	4.57012	2.09185	1.93492	4.85495	3.49879	5.55758	1.99235	3.77023	3.60908	2.822	3.14209	5.67348	1.97841	3.04222	3.31352	3.4973	4.14547	3.39172	3.13143	1.95988	4.75095	3.05002	4.64224	1.90476	4.40564	3.87218	1.95233	3.30932	4.04624
PENK	4.18513	5.41986	5.53822	1.97415	5.19121	2.81296	5.72716	4.80206	5.0451	4.99133	5.80449	5.07488	5.18596	4.92327	5.54366	4.96636	5.53851	6.23134	6.20646	4.12998	2.02528	3.57965	4.65821	4.62572	4.11834	3.84738	4.59609	6.32086	5.64845	3.26321	5.10154	3.56604	2.90638	6.14254	6.42817	4.83523	4.04609	5.9709	4.83875	2.8303	5.50759	4.80738	5.90403	5.08054	4.86283	4.76226	4.79426	4.89216	3.77426
BTC	4.83002	5.5747	3.92657	5.27988	4.90009	1.9685	4.2321	4.56837	1.95319	3.79783	4.76086	5.79581	5.12155	5.05824	3.74614	5.26561	5.41874	5.24836	5.08369	5.0424	2.02528	2.09185	5.34954	4.62572	5.18939	4.11812	3.83167	3.02487	5.33333	4.39636	4.50496	3.10119	3.63064	4.2468	5.26431	4.96208	4.4214	4.02043	5.35116	4.20586	3.87268	5.58772	3.07584	5.44421	4.63551	4.20942	3.52065	3.58965	4.51832
C11orf88	5.77492	3.76773	4.07439	5.4579	4.40736	4.9613	4.47548	4.56837	4.91474	4.02474	4.15409	4.32213	3.95492	5.32504	4.87287	4.73563	4.82926	5.4696	5.39102	3.04216	2.02528	2.09185	4.95458	4.62572	3.97281	5.18873	1.99235	3.02487	5.45388	5.34565	5.05107	3.56604	4.69285	3.50842	4.64285	1.97323	5.11335	5.96719	4.65385	3.74254	1.94433	3.51752	5.91221	5.35712	3.69169	1.9512	5.13069	3.93938	4.69518
ANO4	3.618	5.06437	3.44953	5.72366	5.37108	3.51959	4.96116	3.98932	4.68941	5.4487	3.30279	4.32213	5.67511	4.28074	4.95879	5.31498	4.2718	4.73495	4.20921	1.96301	2.02528	5.39928	4.60063	4.97161	4.81313	4.66543	4.29036	5.10098	4.2616	3.26321	4.22638	2.00993	2.90638	6.06746	4.16123	5.04018	5.56436	2.9381	4.33188	2.8303	3.67499	4.77463	4.01569	4.47784	5.7399	4.06497	3.52065	4.24356	5.71416
APOB	4.83002	4.3657	3.92657	4.46744	1.93233	4.43625	4.75315	4.15321	3.75112	2.74558	4.31152	4.24944	3.60551	4.36154	3	4.1925	5.05792	2.80323	2.83132	4.49323	2.02528	2.09185	3.92144	4.68858	5.21395	3.84738	3.83167	5.44846	1.91666	4.75382	4.50496	4.61172	3.98136	3.04222	3.79225	1.97323	4.87713	4.13991	4.2784	3.26485	5.44715	3.51752	3.53889	4.75464	5.07177	3.87218	3.24311	3.58965	2.84807
L1TD1	5.58775	5.04013	4.55375	1.97415	5.15495	3.99593	4.89546	3.98932	3.27328	3.1688	4.43191	4.24944	4.65965	4.06802	3.94133	3.85914	4.37322	4.75868	2.83132	3.04216	2.02528	2.09185	5.02567	5.2708	4.2826	4.3007	4.81569	3.96569	3.32862	4.60987	3.61807	2.00993	3.63064	4.5514	4.06248	1.97323	3.29573	4.23828	1.93243	3.74254	5.29101	3.05002	3.07584	3.77951	4.15578	3.87218	4.38278	5.042	4.81978
LGALS12	4.80697	1.94309	4.07439	3.75463	1.93233	3.51959	3.49514	3.40816	4.12747	3.79783	4.48257	4.0653	3.60551	2.98019	5.04408	4.59777	3.59982	3.72323	5.44795	3.98257	3.66739	5.3821	3.16844	4.51069	2.62465	4.3007	1.99235	1.93755	3.60908	3.54254	4.42858	2.00993	3.35091	4.34202	4.16123	1.97323	3.29573	3.39172	3.75895	3.26485	2.93985	4.34892	4.45775	3.30059	4.63551	3.59256	2.81055	4.83259	3.29543
LOC389493	5.76659	3.76773	4.9334	4.78669	4.4635	4.7245	1.91018	3.40816	4.28736	4.65807	3.30279	4.90062	1.91747	3.92061	4.56339	5.00724	4.81247	4.65449	5.09425	3.04216	2.02528	5.66367	3.16844	4.59055	3.30008	4.66543	1.99235	3.48943	3.60908	4.33927	4.62763	2.00993	5.10498	3.98401	5.7043	3.4973	3.57604	4.77921	3.13143	4.40322	5.07025	1.929	4.92949	2.85306	3.69169	4.89726	4.09827	2.86145	4.04624
EPO	5.36877	1.94309	4.55375	1.97415	2.88928	5.06472	4.32696	3.60751	4.28736	4.3133	5.0776	4.0653	3.32509	3.72499	4.08826	3.10641	2.70643	1.89419	5.39102	3.04216	4.39818	2.09185	1.93492	3.91532	4.6766	5.50951	1.99235	4.68059	1.91666	3.54254	4.33768	5.22803	4.20263	3.04222	4.43501	4.60266	4.36524	4.32138	3.60463	3.54301	4.83392	3.51752	5.1275	3.58093	4.15578	4.41686	3.24311	2.86145	3.29543
FKBP6	2.94936	4.83839	4.84367	4.58707	4.38361	4.88818	3.53226	4.206	4.05431	4.39168	5.4264	5.40556	2.89961	5.12604	4.32804	4.51982	5.03307	3.79321	5.28146	3.12599	2.02528	3.57965	4.16598	4.41316	4.53592	4.84475	3.11058	3.99191	5.08809	4.95505	5.63187	4.49231	4.35414	3.09156	3.82061	3.83122	4.58186	5.53153	4.37195	4.05789	4.9011	3.55137	5.08627	3.96833	1.91913	4.60595	4.08688	1.91031	4.07694
TRPM8	1.90756	4.04178	4.07439	1.97415	2.88928	2.81296	3.02787	4.42459	4.58946	4.79533	3.58274	3.31415	4.25854	4.18488	5.4466	3.10641	4.77657	4.78109	4.90818	5.51735	4.87504	2.09185	4.65821	4.89204	5.96015	3.64917	3.08578	3.02487	4.33387	1.91419	4.22638	3.10119	3.63064	3.50842	4.31651	5.41198	3.29573	3.6726	5.84236	4.45506	3.67499	4.13858	3.07584	3.77951	3.21438	4.20942	3.72024	3.30932	3.77426
ZNF280B	5.36402	4.47396	4.36901	4.39697	4.70531	5.48987	5.04994	5.91377	4.12747	5.06583	5.17478	4.0653	5.07845	4.67628	5.91293	5.61822	5.72762	5.83665	5.56744	5.5653	3.66739	2.09185	5.88363	4.81392	5.78792	5.37422	4.1739	4.11291	5.06874	4.75382	5.8573	3.10119	3.98136	5.48105	5.79338	4.33629	4.6311	3.39172	5.99039	4.45506	3.87268	5.61564	4.37669	4.86553	4.57086	3.59256	4.38278	5.3822	5.37447
NKAIN4	3.9665	3.76773	3.92657	4.39697	4.97038	3.51959	4.67864	2.71364	5.18484	5.96592	3.58274	5.03854	4.74987	3.44411	4.08826	3.58086	4.2718	2.80323	4.40516	1.96301	2.02528	2.09185	4.45767	4.79175	5.13393	4.49158	4.02692	3.48943	3.60908	1.91419	3.14209	3.8469	3.82961	5.03539	1.88259	3.03522	3.77455	2.9381	4.38028	2.8303	4.7805	3.99251	3.07584	3.77951	1.91913	4.56284	2.81055	4.81057	3.77426
C3orf55	4.34041	4.47396	5.95321	5.82457	4.2717	1.9685	4.89546	4.27931	3.90389	4.96696	3.30279	3.79302	5.02933	4.36154	4.87287	5.32249	5.08385	5.59434	3.26987	4.98576	4.94211	4.82494	4.53461	4.87393	5.0748	4.78986	4.02692	4.22956	3.80745	3.74168	4.89477	4.04224	3.63064	3.78903	5.79509	3.97446	5.35314	4.13991	4.74616	5.82508	4.45722	3.79801	2.00463	4.96695	4.29564	3.59256	3.72024	4.73622	3.29543
SLC14A2	4.34041	4.75542	2.98693	3.01399	3.61849	2.81296	4.40684	4.33252	4.02626	3.1688	3.93313	4.44225	3.95492	2.98019	4.87287	1.88175	4.49461	4.25629	1.9385	3.50591	2.02528	4.63693	3.16844	4.55237	3.02964	1.94704	3.08578	4.32529	3.32862	3.74168	4.57048	2.00993	3.82961	3.04222	5.51108	3.4973	3.92561	2.9381	4.2784	3.89549	2.93985	1.929	3.07584	4.3712	4.49546	4.41686	3.52065	4.05996	4.36608
ALOX15	5.33918	4.56236	5.1562	6.27942	4.4635	5.57136	3.97022	6.19145	5.44966	3.44434	5.73641	6.04301	4.45018	6.18119	5.41956	5.35746	3.87835	5.58159	6.50006	5.42864	4.13978	4.63693	3.64332	3.91532	4.5871	5.14952	3.55091	5.55414	6.41943	5.90936	5.91868	4.482	4.20263	4.13066	5.64583	6.43361	6.06243	4.77921	4.67883	4.28019	3.87268	6.32703	6.26192	6.0987	5.7399	5.71788	5.0366	5.20562	5.34294
C10orf67	4.40331	1.94309	4.81454	1.97415	4.90009	5.39358	5.22034	4.96193	5.43509	5.17972	4.05421	4.95244	5.26053	4.49176	4.93905	4.59777	4.14564	4.09764	1.9385	3.04216	5.09368	5.84164	3.16844	4.68858	4.50573	5.19785	4.02692	1.93755	4.94253	4.20142	1.88593	5.50347	5.65273	3.98401	4.37931	5.13302	4.69343	4.80685	3.75895	4.20586	5.19375	3.51752	3.07584	3.58093	5.25287	3.59256	4.43482	4.05996	5.24281
C2orf66	3.33731	3.28928	3.44953	4.1	1.93233	4.43625	4.47548	4.8829	1.95319	4.36622	1.92328	2.8677	3.32509	2.98019	4.61117	3.85914	4.64538	3.72323	1.9385	1.96301	3.66739	2.09185	4.53461	1.90676	5.02892	2.91775	3.08578	4.47524	3.32862	4.33927	4.97006	3.56604	4.83563	4.49121	4.24464	1.97323	4.36524	2.9381	3.60463	3.54301	2.93985	3.05002	4.01569	3.30059	3.21438	1.9512	2.81055	2.86145	3.57564
WSCD2	4.66693	5.14751	3.44953	4.52898	2.88928	3.24255	5.70744	5.86459	5.31822	4.96696	4.7061	5.97727	5.22539	5.64598	6.0862	6.00071	5.56051	5.83599	4.45659	5.07584	4.6964	2.09185	5.79683	5.50152	6.28655	5.16969	3.08578	5.47121	2.87895	5.11102	5.87479	2.00993	2.90638	5.98384	5.53847	3.77828	4.51706	2.9381	6.27529	4.83432	1.94433	4.49728	3.53889	5.26053	4.63551	4.20942	6.0967	4.15945	4.23001
KCNK12	4.7287	4.04178	3.44953	3.01399	4.51373	3.51959	3.02787	3.60751	1.95319	5.0753	2.8573	1.92734	4.07535	4.18488	3	4.73563	5.02999	4.18284	2.83132	4.55397	4.13978	2.09185	1.93492	3.56486	4.11834	3.84738	1.99235	1.93755	3.95832	3.26321	4.83479	2.00993	2.90638	3.04222	5.13903	3.03522	1.89203	3.39172	4.07537	3.89549	2.93985	4.61014	3.07584	3.77951	3.69169	3.12125	4.09827	4.92734	4.77438
PTCHD1	3.33731	4.47396	4.64555	4.81793	4.18777	2.81296	4.40684	4.96193	2.83619	1.93246	3.58274	3.94441	3.80398	4.43104	5.29891	3.58086	4.71604	4.96818	4.20921	4.9191	2.02528	2.09185	4.53461	4.22093	3.97281	4.21709	1.99235	3.02487	5.09164	3.74168	4.89477	5.71666	5.64864	3.50842	3.94271	4.33629	3.57604	4.13991	3.88357	2.8303	4.75095	4.77463	2.00463	4.42747	3.69169	5.03934	6.17639	3.30932	4.30254
CLEC6A	4.34041	3.28928	4.28787	1.97415	3.3381	1.9685	3.49514	3.40816	4.21328	2.74558	3.93313	3.59428	4.39411	3.72499	3.46539	4.64881	2.70643	4.47496	2.83132	3.04216	3.66739	2.09185	4.45767	2.83973	4.17888	2.91775	4.69736	1.93755	2.87895	3.54254	4.57048	3.10119	2.90638	4.34202	3.31352	4.23987	4.47164	2.9381	1.93243	3.54301	1.94433	3.79801	2.00463	2.85306	3.21438	1.9512	3.72024	4.67809	2.84807
OR13A1	4.18513	4.9233	3.44953	5.41106	4.95399	3.99593	3.49514	3.88603	3.55175	3.79783	2.8573	4.16509	3.32509	4.99697	4.91824	3.10641	3.59982	5.00639	4.61986	4.12998	2.02528	2.09185	4.36611	2.83973	5.39792	3.36863	3.08578	1.93755	4.39702	4.75382	4.22638	2.00993	2.90638	3.98401	5.39201	1.97323	3.77455	3.39172	3.40523	3.74254	1.94433	5.55983	2.00463	3.77951	3.21438	1.9512	2.81055	3.58965	4.51832
MSMB	4.69896	5.14751	6.42957	4.63224	4.76336	5.25901	3.97022	5.99261	5.32364	4.94088	6.47901	4.68564	5.00201	5.72636	5.92898	4.47376	5.63654	6.55954	5.90606	5.17305	6.19205	5.05547	1.93492	3.56486	4.92566	5.35822	4.29036	5.74682	6.69823	5.89315	4.92159	5.53234	5.17054	6.10087	6.02533	5.50993	4.92864	6.20278	5.31022	6.47423	6.00132	4.86582	5.86324	6.53387	6.14326	5.37556	4.81595	1.91031	5.14404
C12orf63	3.33731	1.94309	4.81454	4.1	4.85951	1.9685	4.75315	4.07721	3.27328	3.79783	4.31152	3.59428	4.25854	4.96194	4.08826	4.77301	3.40036	3.87538	1.9385	3.98257	2.02528	2.09185	4.11194	1.90676	3.49879	3.64917	3.83167	3.02487	4.62745	4.92911	5.01283	3.10119	3.98136	4.49121	4.64285	4.48753	4.6311	2.9381	3.60463	4.11976	2.93985	4.70021	2.00463	5.06958	4.63551	3.12125	3.99637	4.64575	5.05333
HRASLS5	5.47413	3.28928	4.55375	3.47352	3.3381	2.81296	4.32696	5.26802	4.46142	4.25433	3.93313	3.94441	4.07535	3.72499	5.53763	4.59777	5.39758	4.84167	5.81039	3.04216	2.02528	3.57965	4.11194	4.35767	4.17888	4.99576	1.99235	4.22956	4.17783	3.54254	6.04528	3.10119	4.20263	4.34202	5.97814	3.4973	2.84719	3.6726	1.93243	3.54301	3.39408	4.49728	5.81856	3.93078	4.82633	4.92492	5.62063	4.53151	4.74965
KCNA6	6.13118	5.04013	3.73054	4.1	4.88033	2.81296	5.3111	4.21998	3.55175	5.35276	4.64329	3.79302	5.05474	4.28074	4.50999	5.26561	3.59982	4.18284	3.74808	3.78684	3.66739	3.57965	5.26547	5.99011	4.11834	5.09324	4.1739	3.48943	2.87895	4.33927	5.42692	3.10119	3.35091	4.42223	5.24548	3.03522	5.08334	2.9381	3.75895	4.68418	2.93985	4.65749	2.00463	4.23514	3.69169	4.62168	4.63382	5.29207	5.23619
LTF	4.59484	5.97187	6.75487	4.8995	4.51373	6.56773	5.36364	6.70419	5.55537	5.03573	6.81856	5.19975	6.03213	6.37648	6.73242	6.48517	6.35252	6.8814	6.80839	6.5185	6.40402	5.46003	4.75462	5.92994	5.28567	4.43571	5.00478	5.95742	6.8603	6.10219	6.09671	4.75628	6.66885	5.42345	6.00983	5.84675	5.87044	6.86636	5.30134	6.83689	6.4453	5.38436	6.64811	6.96818	6.34954	4.83533	6.25244	5.70025	6.52477
SERPINA11	1.90756	4.56236	3.92657	3.01399	4.51373	1.9685	1.91018	4.07721	5.03269	3.92182	4.56999	4.71582	3.95492	3.92061	5.31269	4.80726	4.41717	4.9403	3.54873	3.98257	4.39818	4.325	4.11194	5.32546	5.46485	2.91775	1.99235	3.96569	3.80745	3.26321	4.72322	2.00993	2.90638	5.38377	4.48486	1.97323	4.7724	3.39172	4.72491	4.28019	4.7805	4.73904	3.07584	4.93608	3.69169	3.59256	1.95233	1.91031	4.1458
CYP26A1	3.81606	6.20555	6.17299	5.5653	3.81697	5.35793	5.39779	6.15674	5.52154	3.64387	5.7809	5.93635	5.05474	6.42603	6.16554	5.70252	6.11381	6.0583	5.46144	6.33832	2.02528	3.57965	5.94055	5.71932	5.61463	5.94524	3.08578	4.32529	5.68831	4.92911	6.17468	5.04161	6.65687	5.48538	6.02356	5.38148	5.41784	4.13991	5.56312	2.8303	6.44265	4.70021	4.90272	6.22948	4.49546	6.19028	5.79074	4.15945	5.35228
SYNPO2L	5.34936	4.6365	5.89346	4.31511	5.17359	6.13468	6.27098	4.07721	6.28164	5.27	5.841	4.0653	5.18596	2.98019	5.40504	4.1925	5.46947	5.26564	5.13357	4.12998	4.57012	5.43107	4.36611	6.16066	4.93635	5.91981	5.83908	5.699	2.87895	5.02542	4.22638	5.76755	5.69221	3.78903	4.96812	3.77828	4.51706	5.67897	4.33188	4.78997	5.93043	3.51752	5.88339	4.80273	6.12109	6.38599	5.6452	4.61084	4.77438
TSHR	5.34431	3.76773	4.81454	3.01399	4.5591	2.81296	4.91866	4.15321	1.95319	3.1688	4.05421	4.68564	4.65965	4.83164	3.46539	4.94408	3.12583	4.18284	2.83132	4.80795	2.02528	4.89561	4.65821	3.28494	3.6535	3.64917	4.59609	4.40592	4.07861	4.92911	5.36549	2.00993	3.35091	5.01761	4.67486	3.77828	4.74774	3.87038	4.07537	4.45506	3.39408	4.42873	2.00463	4.52342	3.21438	3.12125	3.87339	5.10903	5.06464
KRT36	5.85193	1.94309	3.73054	4.39697	3.3381	3.24255	3.97022	3.60751	3.27328	1.93246	4.43191	2.8677	3.60551	4.18488	3.74614	1.88175	3.40036	3.99712	5.64872	3.78684	2.02528	2.09185	4.25413	4.13635	4.40689	4.37271	3.08578	3.02487	2.87895	4.27495	4.42858	2.00993	1.97841	5.80403	4.06248	3.77828	3.57604	3.39172	1.93243	2.8303	3.87268	4.42873	4.87398	2.85306	1.91913	1.9512	3.87339	4.37947	4.79772
CLDN8	1.90756	5.97364	5.05462	4.1	5.23915	4.56615	1.91018	5.72853	5.12187	5.17272	6.20592	4.38583	4.58704	6.09608	6.06415	5.35746	4.37322	5.25422	5.55352	5.54419	4.39818	2.09185	5.93461	1.90676	5.57929	3.64917	1.99235	4.53581	5.97015	5.88863	5.85322	3.10119	5.10498	4.80316	5.56548	4.73439	5.68798	5.13109	6.13474	4.40322	6.10593	5.55654	4.80975	6.19579	5.26427	6.10158	6.26585	2.86145	5.387
DPY19L2P1	5.32866	5.43522	4.4388	5.46736	5.28093	4.52667	3.02787	3.40816	3.55175	5.44578	4.23867	4.24944	4.62482	4.28074	4.95879	5.09261	3.12583	5.02979	4.68374	5.07584	3.66739	5.0089	5.40886	5.44393	5.51549	5.60553	1.99235	3.02487	3.32862	5.12949	5.208	3.10119	4.20263	3.04222	4.90435	1.97323	4.79568	4.85705	5.0863	1.95988	4.75095	4.86582	5.1275	4.86553	4.29564	3.12125	4.32473	1.91031	3.57564
FAM25B	5.33396	5.36836	5.71617	4.39697	4.91892	5.90503	3.49514	1.91687	5.32364	5.45735	5.97894	4.38583	4.88652	4.43104	5.69266	4.89507	4.69378	4.32061	5.06157	3.04216	5.77041	5.81519	1.93492	4.03637	1.89017	6.27682	1.99235	5.94052	5.73278	5.22313	3.61807	5.93116	5.57308	3.50842	4.24464	4.80422	4.47164	5.43395	4.2784	5.50047	6.09293	3.99251	5.75641	4.05141	5.42637	4.92492	4.32473	4.87331	4.66505
CALB1	6.52948	6.10712	6.00136	5.5653	6.397	5.93821	1.91018	6.63398	5.64616	3.44434	5.82674	4.65317	5.2922	5.62757	5.5047	6.01966	6.33135	6.28619	6.16826	6.02673	6.06796	2.09185	5.15146	5.71451	5.06758	6.12899	3.08578	5.83771	6.75774	5.54718	6.53009	5.47703	6.61758	4.86198	5.88028	4.80422	6.14815	5.41583	6.09485	4.34536	6.42915	3.05002	6.55737	5.22035	5.68793	6.5806	4.38278	4.05996	5.90726
CPN2	4.26854	4.9233	1.91915	3.01399	4.0884	1.9685	4.9993	4.56837	1.95319	3.44434	3.78158	4.95244	4.97249	4.06802	4.6935	4.1925	3.59982	4.25629	2.83132	3.04216	3.66739	2.09185	3.92144	2.83973	4.98556	4.58669	3.08578	1.93755	3.32862	3.26321	3.89542	3.56604	2.90638	4.49121	1.88259	3.77828	4.6311	3.6726	3.13143	3.74254	3.67499	1.929	2.00463	2.85306	1.91913	3.12125	4.97143	4.76255	3.29543
CNTFR	2.88546	4.04178	4.75488	4.52898	5.39457	3.51959	5.66664	5.11486	5.168	5.50441	3.58274	3.31415	5.3807	4.85667	5.84123	4.47376	1.91133	4.65449	3.54873	6.09125	6.15671	4.325	4.60063	6.00068	4.81313	4.37271	4.29036	4.40592	5.68081	4.91311	4.97006	3.56604	5.56757	3.50842	4.73239	4.93978	3.77455	4.88	5.8234	4.11976	5.1642	5.50594	5.70604	4.95184	5.41288	5.73995	4.9569	4.92734	4.30254
HHIP	5.49914	5.64302	3.92657	3.47352	4.40736	3.99593	3.77562	5.70175	3.27328	4.11223	4.05421	4.49279	4.33085	5.08531	4.56339	4.30479	5.52278	5.13639	5.22299	3.78684	3.66739	2.09185	5.77383	5.24598	5.46485	4.3007	4.1739	3.96569	2.87895	1.91419	4.08505	3.10119	4.65761	4.65233	5.39989	5.80292	4.22945	4.02043	4.21878	3.54301	4.24029	5.16672	3.07584	5.1662	3.96772	3.59256	3.99637	3.58965	1.90037
DYNLRB2	1.90756	5.01416	2.98693	4.52898	4.18777	3.24255	1.91018	3.88603	3.27328	4.3133	1.92328	4.71582	4.07535	4.18488	3	3.85914	3.12583	3.52413	4.0227	4.12998	2.02528	2.09185	3.64332	3.76371	4.11834	2.91775	3.55091	3.48943	4.92543	4.67334	3.14209	2.00993	3.35091	4.2468	4.16123	3.03522	4.51706	3.39172	1.93243	1.95988	1.94433	3.79801	2.00463	4.86553	3.69169	1.9512	2.81055	4.31603	4.55974
TNNC1	5.07096	3.76773	5.68768	4.52898	5.48355	5.62879	6.37276	3.88603	6.37462	4.53459	4.43191	4.86178	5.52398	4.63686	4.72938	3.85914	5.02999	5.55607	5.56289	3.98257	4.6964	2.09185	4.11194	6.37722	3.97281	4.54154	6.21855	4.32529	4.66224	4.57434	4.83479	4.97529	3.35091	4.13066	4.43501	1.97323	4.55837	4.32138	3.75895	4.01819	5.15376	5.60482	5.47104	5.3126	6.38525	6.46403	5.76493	4.43573	4.84068
HP	3.81606	5.04013	5.84637	5.55518	3.3381	5.27776	4.75315	5.29608	5.32896	4.49772	5.36678	5.27792	2.87605	4.99697	6.03606	4.98736	4.96659	4.82246	5.3868	4.24687	4.87504	2.09185	4.65821	4.94179	5.13992	1.94704	4.59609	5.16492	5.74482	5.06	5.52421	5.23989	5.68153	4.13066	4.06248	3.97446	4.85831	5.32374	4.59914	5.62381	5.86935	4.89214	5.3469	6.15776	5.79115	4.92492	4.72151	5.81422	3.92554
SLITRK4	4.89208	4.47396	4.07439	4.52898	4.78959	3.51959	5.8559	6.0007	5.65981	3.79783	4.15409	4.68564	5.37151	4.67628	5.60091	4.80726	4.06954	5.97295	3.74808	3.04216	2.02528	2.09185	4.75462	5.60516	4.5616	4.58669	5.44945	4.92334	3.60908	4.57434	5.48658	4.40142	4.20263	4.77019	5.64583	3.4973	4.4214	2.9381	4.2784	3.26485	2.93985	4.61014	2.00463	5.22741	5.52099	5.18324	5.31123	5.12878	4.04624
UGT1A7	5.51294	6.13568	5.76603	6.00831	4.41389	6.12918	1.91018	6.59663	4.42849	4.40209	6.4087	3.15976	3.74114	6.56369	6.03701	6.11211	6.6252	5.52098	6.32319	6.09198	5.30577	5.55411	6.62457	3.98974	4.57862	5.2026	1.99235	5.8565	6.0518	5.30475	6.61965	3.7534	6.43873	3.77512	5.69031	5.08229	4.08195	5.75652	6.47913	1.95988	6.33607	4.09578	6.23455	6.5711	4.82363	5.9741	6.63521	1.91031	6.08886
LOC100130238	5.7687	4.04178	5.33721	3.75463	5.22393	5.35318	5.2888	2.71364	5.05713	5.13541	4.05421	4.58003	4.58704	4.49176	4.2046	5.29128	1.91133	2.80323	3.54873	4.12998	4.13978	2.09185	1.93492	3.76371	4.97624	5.3296	1.99235	4.11291	4.80309	4.97347	3.89542	4.61172	4.69285	4.86198	3.79225	4.65104	5.59273	4.71779	4.2784	4.92767	4.83392	3.51752	4.45775	4.3077	4.92694	3.87218	1.95233	2.86145	4.5977
HNF4A	4.7287	4.3657	4.86648	3.47352	4.2717	3.51959	3.02787	1.91687	5.17652	4.1879	2.8573	1.92734	4.65965	4.06802	3	4.69445	3.98165	4.4288	3.74808	1.96301	3.66739	4.63693	4.36611	3.56486	4.40689	5.14952	3.08578	4.40592	3.60908	4.20142	3.14209	3.8469	4.28729	3.50842	5.21847	1.97323	5.00129	5.58944	3.40523	4.40322	4.9233	3.99251	4.37669	3.77951	3.69169	5.07675	4.25929	3.93938	2.84807
HRK	4.69896	4.22772	5.16702	4.75294	3.96802	4.60258	4.2321	1.91687	5.03269	4.75438	5.04227	4.58003	4.54577	3.92061	3.94133	4.30479	2.70643	4.32061	4.12367	3.78684	2.02528	2.09185	3.64332	4.62572	1.89017	5.15973	3.55091	1.93755	5.01794	5.07081	3.14209	4.89527	4.85917	1.93815	4.84832	5.31772	3.92561	5.24539	3.75895	2.8303	3.67499	4.42873	5.57781	3.77951	3.21438	4.56284	3.52065	4.05996	4.1458
TMEM190	2.88546	1.94309	2.98693	3.01399	4.40736	3.71919	3.49514	4.33252	1.95319	4.68423	3.58274	4.24944	2.87605	5.5124	3	3.58086	3.12583	1.89419	3.90057	3.04216	2.02528	2.09185	1.93492	3.56486	4.05025	1.94704	3.55091	3.96569	5.21959	5.50261	1.88593	3.10119	2.90638	3.04222	3.59417	3.03522	4.4214	3.6726	3.75895	2.8303	3.39408	1.929	3.53889	5.44421	3.21438	4.06497	1.95233	1.91031	5.20826
NLRP2	6.286	4.22772	6.34045	3.95132	4.85951	4.48355	5.69696	6.3369	5.48628	6.52663	6.36564	3.79302	6.41596	5.26311	6.33275	5.87359	5.06679	5.93029	5.64537	5.10646	4.57012	6.57765	6.31082	6.36007	4.53449	4.762	5.18691	5.62034	5.76072	6.10709	6.1894	3.56604	5.87737	5.30856	6.37929	5.45006	6.29871	4.02043	4.15171	5.52611	5.07025	6.11485	6.54837	6.15965	6.25142	4.32348	5.24644	6.27507	5.16961
SEC14L4	5.40826	5.70841	2.98693	5.70072	4.90009	4.09811	3.97022	5.25809	4.46142	5.67181	1.92328	2.8677	5.11127	5.6233	5.87605	5.47957	5.41582	5.87485	2.83132	5.60027	4.39818	5.32454	5.82628	4.92589	5.80909	4.81596	3.55091	3.02487	3.95832	3.74168	5.05107	2.00993	2.90638	4.49121	5.63461	3.77828	5.57485	5.34802	5.7446	5.09849	1.94433	5.63602	3.07584	5.79178	3.96772	5.52511	4.56407	2.86145	4.04624
HTR2C	5.66714	1.94309	5.32441	5.80028	5.89249	2.81296	5.66258	4.76451	5.51877	4.63024	4.05421	5.53179	4.88652	4.7456	5.33856	5.26561	5.02015	5.54773	1.9385	1.96301	2.02528	4.82494	4.95458	4.03637	5.79931	5.89259	5.44945	5.50426	5.46765	5.49443	5.43239	2.00993	2.90638	4.99892	5.16494	3.03522	4.30188	1.9462	3.13143	5.28149	5.52088	5.73287	4.16341	4.95184	5.51136	1.9512	4.25929	5.17362	2.84807
SYT6	1.90756	3.76773	4.1916	4.21806	4.67309	1.9685	5.21068	3.98932	4.28736	2.74558	3.58274	2.8677	4.65965	4.06802	4.3805	3.85914	2.70643	3.72323	1.9385	1.96301	4.13978	2.09185	3.16844	3.76371	4.5616	1.94704	4.53565	3.96569	3.32862	3.54254	4.08505	2.00993	1.97841	4.2468	1.88259	4.5486	4.4214	1.9462	1.93243	2.8303	2.93985	3.51752	2.00463	3.93078	4.63551	3.59256	3.87339	4.53151	4.47277
LIPK	2.88546	4.95605	5.36128	1.97415	5.06839	5.07585	5.34498	3.40816	4.93165	4.56877	5.37136	3.94441	5.4663	4.67628	4.65429	5.4663	2.70643	4.65449	3.74808	4.49323	4.94211	2.09185	5.08512	5.46963	3.02964	5.02637	3.83167	6.00245	5.11314	4.4475	3.61807	2.00993	4.61935	3.04222	4.64285	4.33629	4.87713	4.74964	4.95295	5.01629	4.83392	3.05002	3.81979	3.30059	3.69169	4.89726	3.24311	5.20562	4.30254
LHX8	5.50175	4.56236	5.2071	4.21806	5.11436	2.81296	5.5912	5.27625	5.08004	5.14855	5.44975	1.92734	5.60516	4.67628	5.26932	5.12931	1.91133	4.78109	5.07279	5.04397	2.02528	2.09185	5.73663	4.03637	1.89017	4.7231	1.99235	3.02487	2.87895	2.822	5.48208	5.06137	3.98136	5.67547	4.43501	5.08493	1.89203	4.51092	2.71501	3.89549	4.94275	5.42559	4.45775	4.99547	1.91913	4.98939	4.72151	1.91031	5.52421
RBP4	4.34041	5.68542	3.44953	5.18107	4.95399	2.81296	4.89546	4.8829	4.12747	5.58708	4.23867	4.44225	4.69189	4.9431	4.3805	4.98736	5.88835	5.34433	4.40516	3.50591	2.02528	5.0089	5.40886	5.92363	4.7505	4.58669	3.55091	4.58941	4.5032	3.74168	5.62927	2.00993	5.27296	4.73441	6.16423	3.4973	5.14964	1.9462	5.32725	3.54301	5.57925	5.47673	4.16341	4.15098	3.96772	5.53779	4.09827	4.85348	3.29543
SHD	4.26854	1.94309	4.9903	3.01399	4.88033	4.43625	4.78592	1.91687	4.65855	4.53459	4.23867	3.94441	5.04226	4.36154	1.9036	4.89507	3.59982	4.89415	4.54537	4.12998	4.39818	5.22857	3.64332	5.52765	4.17888	4.3007	4.1739	1.93755	2.87895	4.01564	4.92159	3.8469	2.90638	3.78903	4.64285	3.03522	5.01424	3.87038	2.71501	4.34536	3.39408	4.25416	3.53889	3.58093	5.25287	3.87218	4.81595	4.97461	4.79772
CYP11A1	5.39136	4.56236	2.98693	1.97415	4.2717	4.91388	5.04994	1.91687	4.12747	5.32753	6.11285	4.68564	4.39411	4.18488	6.07821	5.38873	3.98165	4.62394	6.21618	3.04216	4.87504	3.57965	1.93492	4.13635	5.32126	3.99806	3.55091	4.68059	4.33387	3.89392	5.67252	2.00993	3.35091	4.83364	5.95685	3.03522	4.22945	6.1489	3.75895	2.8303	5.18419	5.57567	4.95461	4.23514	5.31589	4.76226	3.99637	4.43573	5.67331
GLYATL2	5.15418	4.70003	5.80857	5.64768	3.81697	4.91388	4.96116	5.744	3.75112	3.44434	5.55219	5.46893	3.60551	5.29904	5.87682	5.23764	5.7674	6.11851	5.65692	5.95294	4.6964	2.09185	4.86705	3.28494	6.09475	3.36863	1.99235	5.15304	5.94662	3.74168	5.95322	2.00993	5.54144	5.15258	5.96563	5.0896	3.77455	5.62053	5.70723	5.61211	5.32423	4.49728	5.40535	5.82045	5.4576	3.12125	4.72151	4.98913	4.23001
RGS22	4.63238	3.28928	2.98693	3.01399	3.61849	4.18486	5.12097	4.62629	2.83619	1.93246	4.31152	4.44225	4.50041	4.99697	3.46539	4.64881	4.49461	4.78109	5.34599	3.50591	2.02528	5.0089	4.11194	4.29385	4.2826	4.58669	3.08578	5.42886	4.88876	5.33151	4.42858	3.56604	3.35091	4.2468	4.95318	1.97323	4.04609	2.9381	3.13143	3.54301	1.94433	4.49728	4.16341	5.34778	4.7862	4.06497	3.72024	3.30932	4.69518
LCE1C	5.34431	5.14751	4.81454	4.52898	5.36614	1.9685	4.94051	1.91687	5.73428	4.1879	4.37535	4.16509	4.74987	4.36154	5.74067	5.58832	5.10797	4.95451	5.02563	5.32587	5.13311	6.08914	3.92144	4.35767	5.81437	5.17933	1.99235	6.26911	4.07861	5.34565	4.62763	4.482	4.88141	5.47666	3.31352	4.23987	4.74774	3.6726	5.39731	5.07684	4.85825	3.79801	5.82444	4.05141	4.40564	5.39642	5.87996	4.37947	4.04624
PLA2G2D	3.81606	4.47396	5.38891	5.39958	5.13525	3.24255	5.5393	4.33252	4.94785	3.44434	5.90019	4.24944	5.11127	5.88191	5.31939	5.76232	5.68674	5.54984	4.40516	5.32587	4.57012	2.09185	5.91485	5.21194	5.42754	3.99806	4.95934	4.8198	3.60908	5.88458	6.05144	2.00993	3.98136	5.93688	5.66399	5.26678	5.3791	4.13991	2.71501	5.49747	4.02267	5.72086	2.00463	5.74318	3.69169	4.56284	5.87672	6.27411	6.13847
PTCRA	2.88546	3.76773	3.92657	3.47352	4.34408	1.9685	4.2321	3.13336	3.27328	2.74558	4.76086	3.79302	4.77609	4.63686	3.46539	4.3966	3.59982	4.32061	1.9385	3.78684	3.66739	5.54429	4.8985	3.91532	4.05025	2.91775	1.99235	1.93755	1.91666	3.54254	4.62763	3.10119	1.97841	3.78903	4.80589	4.65104	4.04609	2.9381	2.71501	3.74254	1.94433	4.25416	2.00463	4.15098	3.21438	1.9512	4.43482	5.34538	5.0416
THSD7B	6.30114	4.56236	4.78579	3.75463	5.56904	2.81296	4.32696	6.11335	4.46142	4.89808	5.06621	3.94441	4.90533	5.22258	6.06318	5.56735	6.02146	5.987	4.40516	5.92348	2.02528	2.09185	5.34954	4.83496	6.22036	5.54051	3.83167	5.47121	4.2616	4.27495	5.25053	2.00993	3.98136	4.83364	5.90497	5.10466	4.22945	3.39172	5.55564	4.34536	5.67719	5.75981	5.86571	4.91961	4.95535	4.56284	4.74718	4.57293	4.93113
VIPR2	2.88546	3.28928	4.4388	4.8741	3.81697	1.9685	4.80109	3.76174	4.80323	4.63024	4.56838	3.59428	4.1951	4.35934	4.27961	5.00915	4.29593	4.48544	4.03793	1.96301	3.66739	2.09185	3.01585	4.82835	3.73897	3.36863	3.05337	5.1982	3.52821	4.33927	4.8364	2.00993	1.97841	5.42329	4.92432	4.92071	3.82552	3.85832	2.71501	1.95988	1.94433	4.67161	2.00463	3.49997	5.07614	5.11846	4.08023	5.0541	4.95692
CHST5	3.34745	3.77456	1.91915	3.02015	4.27557	4.32616	1.91018	3.88824	1.95319	3.44434	2.8573	4.38646	3.61007	4.36823	4.44962	4.31572	2.71174	4.18756	3.55796	3.99743	3.66739	2.09185	3.16844	2.83973	5.0455	2.91775	3.0983	3.02487	4.07861	4.27562	4.23257	2.00993	2.90638	4.91326	4.60903	4.49529	4.22945	4.98021	3.60635	2.84162	4.39477	4.13858	3.07584	4.23749	3.9721	3.59256	3.52065	3.31957	4.23619
SMC1B	3.618	5.10839	4.36901	3.75463	5.55905	3.24255	3.77562	4.21998	4.46142	4.11223	4.48257	4.38583	4.95678	3.44411	3.46539	4.98736	4.41717	3.87538	2.83132	3.98257	2.02528	5.41557	3.92144	3.76371	4.76709	4.11812	1.99235	3.02487	5.86768	4.4475	5.69165	4.482	4.10254	4.13066	4.60833	4.77075	5.14964	3.39172	5.33943	3.26485	4.39477	5.21132	4.16341	3.30059	4.40564	4.20942	5.36947	4.43573	3.57564
ALMS1P	4.63238	1.94309	3.73054	3.95132	3.96802	4.48355	4.53545	3.60751	3.27328	3.64387	3.58274	1.92734	2.87605	4.28074	4.50999	3.58086	3.75402	3.72323	3.74808	3.50591	2.02528	2.09185	4.25413	3.56486	4.61128	1.94704	4.53565	3.48943	3.80745	3.54254	3.89542	2.00993	3.35091	1.93815	4.37931	4.60266	4.51706	3.6726	1.93243	1.95988	2.93985	4.55717	3.07584	3.58093	1.91913	3.12125	4.09827	4.43573	3.57564
PTPRVP	5.10458	1.94309	3.44953	1.97415	2.88928	2.81296	3.02787	3.76174	1.95319	2.74558	3.30279	3.31415	2.87605	4.18488	4.3805	4.04994	3.59982	1.89419	3.74808	1.96301	2.02528	2.09185	1.93492	3.28494	3.6535	4.43571	1.99235	1.93755	3.32862	4.77753	4.97006	2.00993	1.97841	3.98401	3.94271	3.03522	4.51706	4.23828	2.71501	2.8303	4.51261	3.51752	2.00463	3.58093	3.69169	1.9512	2.81055	4.05996	4.1458
CFTR	1.90756	5.63216	5.41421	3.01399	3.3381	5.05328	4.40684	5.43966	3.90389	3.79783	5.42158	4.0653	5.14123	5.17622	5.45085	5.56735	5.32319	5.71879	5.7876	5.5008	2.02528	2.09185	5.21958	6.03626	4.81313	1.94704	3.08578	5.48406	5.958	5.12949	5.08552	4.30583	5.49883	4.34202	5.37131	3.4973	5.58492	5.47104	4.62731	5.31074	5.17435	3.99251	5.30405	5.75809	5.53028	1.9512	1.95233	1.91031	4.97655
PON3	5.24906	4.80433	5.29711	1.97415	5.10341	5.61358	4.75315	5.24257	6.35226	5.59239	5.24327	5.95612	5.4981	4.06802	4.93905	5.88555	5.21948	5.63391	5.92215	3.98257	4.39818	5.09707	4.11194	5.20469	5.92952	5.80794	3.08578	3.48943	5.03082	3.26321	5.15903	4.79556	3.63064	5.89751	5.86086	3.4973	2.84719	5.5994	5.05023	5.16499	5.94736	4.96174	5.90714	4.3077	4.29564	5.70054	4.43482	1.91031	5.15278
RNF183	4.97736	3.28928	5.4463	4.52898	4.18777	4.97591	3.02787	4.67748	4.12747	4.11223	5.08864	5.05111	3.32509	5.16612	4.91824	5.42232	3.75402	5.20401	5.86591	3.78684	2.02528	2.09185	1.93492	5.37182	3.30008	5.37422	1.99235	4.71991	5.73524	5.84867	5.03245	5.6012	4.92248	3.98401	3.94271	5.00315	4.36524	5.82906	4.07537	4.61971	5.32423	4.42873	5.5337	5.33812	4.82633	1.9512	4.87487	3.30932	4.79772
ADARB2	3.618	4.98626	4.4388	5.52244	4.70531	3.51959	1.91018	5.65469	2.83619	3.64387	4.37535	4.24944	5.02933	4.90233	4.61117	4.98736	5.6921	5.04097	4.78858	3.98257	4.13978	2.09185	4.11194	4.22093	3.6535	4.37271	1.99235	3.48943	5.09164	4.64276	4.92159	2.00993	4.75582	5.55022	5.22543	5.41772	4.4214	2.9381	4.87057	3.26485	2.93985	5.50194	2.00463	5.30174	4.86283	4.20942	3.52065	1.91031	5.42536
SLC9A4	5.33396	5.81233	5.45486	4.63224	2.88928	6.52458	1.91018	5.46106	4.21328	3.1688	4.85242	4.79528	3.60551	5.23943	5.96325	5.10739	6.27187	5.78337	6.0621	6.15638	4.57012	2.09185	5.04658	2.83973	4.6766	5.14952	3.08578	4.7891	5.79356	5.46836	6.14523	2.00993	5.38889	5.52155	5.90185	3.03522	4.4214	5.91435	5.11903	3.54301	5.09622	5.17845	5.02144	4.98149	5.15926	4.56284	5.43665	1.91031	4.97655
RLN2	3.618	4.04178	3.44953	4.39697	5.71421	3.24255	3.02787	4.8829	1.95319	3.92182	1.92328	2.8677	3.60551	3.92061	4.65429	4.47376	3.75402	4.18284	4.0227	3.04216	2.02528	2.09185	5.00345	1.90676	4.79837	2.91775	3.08578	4.11291	3.60908	1.91419	5.08552	2.00993	3.63064	4.13066	3.59417	4.12249	4.22945	3.39172	2.71501	3.89549	3.87268	1.929	4.58834	3.77951	3.69169	1.9512	3.24311	4.57293	4.51832
SCG3	1.90756	1.94309	2.98693	3.01399	4.18777	1.9685	3.02787	3.40816	3.27328	2.74558	4.05421	1.92734	4.07535	4.43104	4.08826	3.58086	3.75402	4.47496	4.34776	3.78684	2.02528	2.09185	5.00345	3.76371	4.86723	1.94704	3.55091	1.93755	4.39702	3.54254	4.42858	2.00993	1.97841	3.78903	4.96812	3.03522	2.84719	2.9381	2.71501	3.74254	2.93985	1.929	2.00463	4.3077	3.69169	3.59256	3.87339	3.58965	4.04624
TPTE2P1	3.81606	4.22772	1.91915	5.54468	3.96802	4.18486	4.67864	4.89726	2.83619	4.49772	1.92328	4.71582	3.80398	4.80498	5.01232	4.30479	5.11566	3.24469	4.54537	3.04216	2.02528	4.325	3.92144	2.83973	5.26218	2.91775	3.08578	3.02487	4.77849	4.11626	5.11687	3.10119	1.97841	4.95853	5.17316	1.97323	4.92864	3.39172	3.75895	1.95988	1.94433	3.99251	3.07584	4.60275	1.91913	4.41686	3.72024	3.93938	3.92554
DLGAP1	6.00859	3.28928	5.31471	5.67554	4.2717	1.9685	3.49514	5.26309	3.90389	4.65807	5.33253	4.61807	4.25854	4.7456	5.29891	5.37037	5.58246	5.5279	6.11887	4.9191	4.13978	4.50447	1.93492	3.56486	5.80073	5.75332	3.08578	4.32529	4.80309	4.01564	5.47749	3.8469	5.39395	4.73441	5.02239	3.4973	5.15815	5.99228	5.55166	3.89549	5.59459	3.51752	5.81856	5.35249	4.29564	3.59256	5.57022	4.53151	4.04624
FLJ12825	3.33731	4.47396	3.44953	4.21806	3.61849	3.99593	4.40684	3.88603	4.40984	5.14319	3.58274	2.8677	4.62482	2.98019	4.65429	4.04994	4.32503	3.52413	3.54873	3.98257	4.39818	4.50447	1.93492	1.90676	5.20918	2.91775	5.11522	3.48943	4.17783	4.49371	4.9466	4.04224	3.82961	4.80316	4.78285	4.41758	5.12281	2.9381	4.21878	5.00291	1.94433	3.05002	3.81979	1.90476	1.91913	3.87218	3.99637	4.64575	4.1458
BTNL8	4.69896	4.70003	4.07439	3.47352	5.06839	3.24255	4.47548	3.13336	3.27328	3.92182	4.15409	1.92734	4.58704	4.67628	3	4.73563	3.59982	4.75868	4.12367	4.69913	4.13978	4.63693	3.16844	2.83973	4.78303	2.91775	4.02692	3.48943	3.80745	4.75382	4.42858	4.04224	1.97841	4.13066	4.96812	3.97446	4.6311	3.87038	3.13143	1.95988	2.93985	4.77463	4.01569	3.30059	4.57086	3.12125	3.24311	4.24356	4.04624
COL29A1	4.89208	4.6365	4.91236	3.95132	1.93233	3.24255	4.2321	5.09077	1.95319	2.74558	5.65224	2.8677	4.39411	5.52825	4.93905	5.86645	3.40036	5.25997	4.50308	4.9191	3.66739	2.09185	5.18038	4.46493	4.32756	3.84738	4.46645	4.89991	4.39702	5.6593	5.37886	4.83152	2.90638	4.2468	4.60833	4.65104	3.29573	4.74964	4.9651	4.74035	4.85825	4.42873	3.07584	5.28474	5.24103	3.12125	3.52065	3.93938	5.1777
C2orf40	1.90756	4.47396	4.1916	3.01399	2.88928	2.81296	5.29641	4.62629	5.168	1.93246	4.52834	5.16597	3.32509	5.0289	4.08826	4.1925	4.37322	4.84167	4.45659	4.12998	2.02528	4.82494	1.93492	5.92265	3.6535	3.36863	4.69736	5.17639	4.94253	4.79996	5.08552	2.00993	3.82961	3.50842	3.94271	1.97323	4.51706	3.39172	4.42444	4.11976	4.32329	4.96174	3.07584	5.27285	5.61247	5.55385	4.63382	4.64575	5.22943
CXCR2P1	4.9923	1.94309	5.25929	3.47352	5.58796	3.51959	5.93006	4.42459	2.83619	3.79783	5.33766	4.58003	5.74144	5.42487	5.28447	4.04994	4.67023	5.02979	4.20921	4.24687	4.94211	4.325	4.95458	4.29385	5.33442	1.94704	5.67818	3.96569	4.77849	5.15548	5.31337	4.04224	2.90638	5.72911	4.64285	5.62728	5.67439	3.39172	4.15171	4.89292	2.93985	5.4723	3.53889	4.96695	4.6919	4.92492	5.08148	5.85346	5.51933
NEU4	4.75648	1.94309	5.78474	1.97415	3.3381	3.71919	4.53545	3.88603	5.14106	4.73225	5.41377	3.94441	4.45018	5.05824	3.74614	4.04994	4.45744	4.32061	5.30456	1.96301	2.02528	2.09185	3.64332	4.71687	1.89017	5.05463	4.46645	3.48943	4.07861	4.95928	3.61807	4.99867	2.90638	4.60468	4.57081	4.23987	4.04609	5.55719	2.71501	1.95988	4.85825	4.89214	4.45775	4.23514	4.98181	5.49791	3.24311	2.86145	3.77426
NTNG1	4.08637	4.47396	3.73054	1.97415	4.91892	1.9685	4.58843	3.98932	3.55175	5.15081	4.05421	4.24944	4.07535	2.98019	3	4.69445	3.12583	3.87538	2.83132	3.50591	4.79493	2.09185	3.16844	5.39656	2.62465	3.36863	4.1739	4.53581	4.77849	3.89392	3.89542	2.00993	1.97841	1.93815	4.06248	3.03522	3.77455	3.6726	5.15604	5.5914	3.87268	3.79801	2.00463	4.63772	3.69169	4.06497	3.87339	4.70816	4.99051
CR2	1.90756	4.75542	4.64555	4.31511	2.88928	2.81296	4.47548	3.40816	2.83619	5.42432	5.5268	2.8677	4.25854	4.9431	4.2046	5.59119	3.59982	5.10133	4.45659	5.4547	2.02528	2.09185	4.65821	4.76828	3.6535	4.43571	1.99235	4.63732	4.07861	5.72008	5.44304	2.00993	3.35091	4.93656	5.68895	3.77828	4.91223	5.26871	3.88357	5.72927	3.67499	5.27726	3.81979	5.98601	3.69169	4.92492	6.30085	6.43439	6.42879
GLB1L3	1.90756	4.3657	5.52867	1.97415	4.0884	4.09811	1.91018	3.40816	4.35226	5.29527	4.31152	4.96823	5.01592	3.72499	3.74614	4.30479	4.41717	4.91019	4.78858	1.96301	4.99952	2.09185	3.92144	5.80305	3.02964	1.94704	3.08578	4.58941	5.63242	4.11626	4.50496	2.00993	5.33314	3.04222	4.80589	3.03522	4.87713	5.40632	5.66074	4.20586	5.84039	3.05002	4.16341	5.46403	5.63812	1.9512	3.24311	4.05996	4.66505
ELAVL4	2.88546	3.76773	3.44953	4.63224	3.3381	1.9685	4.89546	2.71364	1.95319	4.1879	4.05421	1.92734	4.50041	4.43104	3.94133	4.04994	3.98165	4.55557	3.54873	1.96301	2.02528	2.09185	4.45767	4.55237	4.40689	2.91775	4.1739	3.77023	4.2616	4.20142	3.61807	2.00993	2.90638	4.49121	3.79225	4.41758	3.92561	2.9381	3.75895	4.40322	2.93985	4.49728	2.00463	4.15098	1.91913	1.9512	3.52065	4.24356	3.29543
GABRB2	4.08637	4.47396	2.98693	4.1	4.81427	3.24255	4.94051	3.60751	3.27328	3.79783	3.93313	5.42949	5.00201	4.59347	4.65429	5.14833	1.91133	3.24469	3.90057	3.98257	4.13978	4.325	4.60063	3.76371	3.97281	3.84738	1.99235	3.02487	4.17783	4.01564	3.89542	2.00993	2.90638	4.13066	5.87498	1.97323	2.84719	2.9381	4.98829	2.8303	4.39477	5.43418	2.00463	4.05141	3.96772	4.06497	4.52478	4.05996	4.42237
SP5	4.08637	4.04178	3.92657	5.67332	3.81697	5.05328	3.02787	4.8196	1.95319	4.96696	5.32731	5.06327	2.87605	4.49176	4.61117	4.96636	5.10011	4.78109	4.98576	3.78684	5.16865	4.74055	1.93492	4.03637	3.30008	3.36863	3.08578	5.21871	4.94253	4.49371	4.42858	4.61172	3.98136	5.83918	5.49768	1.97323	3.92561	4.68341	3.88357	5.32708	4.14201	4.89214	3.81979	5.36618	4.7862	3.12125	1.95233	4.53151	5.59322
ELFN2	4.75648	5.10839	4.1916	4.21806	5.46639	3.87261	5.98072	5.81196	5.71495	6.2682	4.48257	4.24944	5.17746	5.63385	4.65429	4.69445	5.73841	5.07246	4.68374	4.4237	5.80853	3.57965	5.08512	5.92115	5.26621	4.49158	5.72683	5.03987	5.66189	4.01564	5.44304	3.8469	4.57758	4.88847	5.47173	4.5486	5.84328	3.6726	5.02054	5.9862	3.67499	5.37208	2.00463	4.84571	4.40564	4.95073	3.52065	4.98913	5.86864
HRNBP3	3.33731	1.94309	1.91915	3.01399	3.81697	4.09811	1.91018	3.60751	4.02626	5.40115	2.8573	3.79302	3.32509	4.06802	4.30003	4.3966	4.32503	3.24469	2.83132	4.34285	3.66739	2.09185	3.16844	4.29385	5.13992	5.3296	1.99235	3.02487	3.60908	4.39636	4.42858	2.00993	3.63064	4.2468	4.31651	1.97323	4.94437	3.39172	4.2784	3.54301	3.67499	3.99251	2.00463	3.30059	4.15578	3.12125	2.81055	4.24356	3.57564
PIWIL2	6.36019	4.98626	5.30417	3.75463	4.4635	3.99593	4.9993	4.99596	5.23792	4.36622	5.99975	4.44225	5.23992	3.92061	3.46539	5.40601	3.98165	4.55557	6.19224	4.24687	2.02528	4.325	4.75462	4.89204	5.10237	5.94637	1.99235	4.89991	4.07861	6.09222	4.50496	6.34674	4.20263	4.42223	4.31651	3.77828	4.7724	5.53647	4.92737	3.74254	5.9783	5.69103	5.94231	5.10152	3.96772	5.07675	4.72151	4.91017	5.43246
DNAJC5B	3.618	1.94309	4.1916	4.75294	4.90009	1.9685	4.47548	4.65265	4.02626	2.74558	4.76086	4.24944	5.01592	4.59347	5.04408	4.3966	4.82926	4.18284	4.0227	3.78684	3.66739	2.09185	5.34123	5.11228	3.88359	2.91775	3.55091	3.02487	3.32862	4.49371	5.17198	2.00993	3.63064	4.65233	3.31352	4.5486	4.51706	3.39172	1.93243	3.74254	2.93985	5.41306	3.07584	4.3712	1.91913	3.59256	4.99889	5.31451	4.5977
ARX	1.90756	4.22772	3.44953	5.39369	4.70531	3.51959	5.15746	3.40816	5.15027	4.49772	3.30279	1.92734	4.07535	4.18488	3.94133	4.47376	3.40036	3.99712	1.9385	3.04216	2.02528	4.82494	3.92144	5.04885	3.02964	2.91775	4.38593	3.02487	3.60908	4.01564	4.67812	3.56604	3.63064	4.13066	4.16123	3.03522	4.22945	1.9462	3.60463	2.8303	3.87268	3.05002	2.00463	4.3712	5.26427	5.36825	3.99637	1.91031	3.29543
HGD	1.90756	3.28928	4.64555	3.95132	4.18777	2.81296	3.77562	3.40816	3.55175	1.93246	4.15409	4.24944	1.91747	4.85667	3	3.85914	3.12583	5.10133	3.90057	3.04216	4.57012	2.09185	3.16844	3.28494	5.08192	3.36863	1.99235	4.53581	5.30564	3.74168	3.61807	3.10119	2.90638	3.98401	4.24464	3.77828	4.22945	4.51092	3.13143	3.54301	4.24029	3.51752	5.04137	5.13996	4.6919	3.12125	1.95233	3.30932	3.29543
KIF12	4.18513	5.08707	4.86648	3.95132	5.85434	1.9685	5.24777	3.88603	4.7453	5.97104	3.78158	5.34064	5.28612	3.92061	4.2046	5.28297	3.87835	4.4288	5.02563	3.04216	5.83464	5.91841	4.53461	5.7046	4.89169	5.18873	5.71383	3.77023	4.07861	3.74168	4.22638	4.18931	2.90638	5.15258	2.86137	4.96208	5.44219	3.87038	5.14895	5.5736	4.32329	5.25976	4.45775	4.60275	4.82633	4.41686	3.24311	5.6792	4.04624
C4orf39	3.9665	1.94309	2.98693	3.47352	4.90009	2.81296	3.77562	5.13006	3.75112	5.41131	4.31152	3.31415	4.1746	2.98019	4.61117	5.20696	4.73719	4.73495	3.26987	4.24687	2.02528	2.09185	5.28618	5.06024	5.179	3.84738	4.1739	3.77023	5.01794	4.01564	4.99207	2.00993	2.90638	4.2468	5.0695	1.97323	4.98788	1.9462	4.7025	3.89549	3.39408	1.929	2.00463	3.58093	4.40564	4.20942	4.09827	4.67809	4.81978
PNMA5	4.26854	3.28928	4.07439	1.97415	6.33699	3.87261	3.49514	4.46486	4.65855	3.44434	3.78158	1.92734	2.87605	2.98019	4.97752	3.10641	3.75402	3.72323	4.90818	3.50591	2.02528	2.09185	1.93492	5.94296	4.05025	5.43087	3.83167	4.11291	4.17783	4.67334	6.43435	3.56604	2.90638	3.78903	3.31352	4.77075	3.29573	5.93382	1.93243	2.8303	5.47897	3.51752	4.28053	1.90476	3.21438	1.9512	3.87339	3.93938	3.57564
C16orf89	2.88546	1.94309	4.1916	3.95132	3.3381	3.51959	5.09427	4.42459	4.58946	3.1688	4.97441	4.38583	3.80398	4.36154	1.9036	4.98736	4.32503	5.24239	5.23696	4.69913	3.66739	3.57965	1.93492	3.56486	3.97281	1.94704	3.08578	4.84832	5.30564	4.82119	5.29668	4.18931	2.90638	3.98401	4.99629	3.03522	4.14547	4.68341	4.82183	4.89292	4.88115	5.31722	4.84313	5.46082	5.24103	4.41686	4.09827	4.48606	5.41439
RERGL	3.81606	1.94309	3.73054	3.75463	4.0884	2.81296	4.2321	3.88603	5.05713	3.64387	3.58274	3.31415	3.32509	3.72499	3.74614	4.3966	2.70643	1.89419	3.54873	1.96301	2.02528	2.09185	1.93492	2.83973	3.02964	2.91775	3.83167	4.68059	3.80745	3.54254	4.72322	3.10119	2.90638	3.04222	3.79225	3.77828	3.57604	1.9462	2.71501	2.8303	1.94433	3.99251	2.00463	3.58093	4.29564	3.87218	2.81055	4.24356	3.57564
PRB3	5.43943	5.12851	5.39416	5.51065	4.5591	4.48355	3.77562	4.67748	4.35226	4.7089	6.23359	5.19975	3.95492	5.23943	4.91824	4.04994	4.69378	5.53242	4.76474	4.77472	4.39818	2.09185	3.92144	1.90676	5.24547	5.15973	3.08578	3.02487	6.00026	4.86058	4.67812	3.10119	3.63064	3.78903	5.33968	4.33629	3.92561	4.88	4.82183	5.87735	4.56215	4.65749	3.81979	6.44757	4.15578	4.32348	4.77139	3.78821	3.77426
GGTLC1	1.90756	1.94309	4.28787	3.95132	5.17359	4.98994	4.11644	3.13336	4.28736	3.92182	4.48257	4.16509	4.54577	2.98019	4.08826	3.58086	3.40036	4.09764	4.20921	3.04216	5.04953	5.16865	4.53461	3.91532	4.5871	4.62781	1.99235	3.02487	2.87895	4.67334	4.33768	4.71307	2.90638	3.98401	2.86137	3.4973	3.29573	4.94172	4.07537	3.54301	4.14201	3.99251	3.53889	1.90476	3.21438	3.12125	2.81055	3.78821	3.77426
PAX1	4.87248	4.22772	2.98693	1.97415	4.70531	4.56615	5.31818	3.13336	1.95319	5.38709	3.93313	4.90062	4.77609	5.40649	4.08826	5.2744	4.64538	5.11043	5.34112	5.43934	3.66739	5.05547	4.79564	4.22093	3.6535	1.94704	4.29036	3.02487	5.54636	5.38849	4.22638	2.00993	3.63064	3.50842	4.57081	1.97323	5.25845	4.51092	5.20188	1.95988	4.88115	4.34892	4.77355	4.99547	1.91913	3.59256	4.87487	4.98913	6.3117
CGB2	4.26854	4.04178	3.73054	4.63224	5.74704	3.51959	3.97022	4.74441	2.83619	5.21884	3.58274	4.53847	3.60551	1.89913	4.2046	3.10641	3.12583	3.24469	1.9385	1.96301	4.39818	3.57965	3.16844	3.28494	4.44216	3.36863	3.55091	1.93755	1.91666	3.26321	5.08552	2.00993	2.90638	3.50842	1.88259	3.77828	4.36524	3.39172	3.40523	4.45506	4.02267	3.79801	3.81979	4.42747	1.91913	4.20942	3.72024	4.05996	3.77426
ADRA1B	3.9665	4.04178	5.88666	4.98732	5.29373	3.24255	4.9993	5.09077	5.73304	5.97427	3.30279	5.54741	5.33703	3.72499	3.46539	4.89507	3.98165	4.51703	1.9385	3.04216	4.6964	4.05762	4.11194	4.81392	4.50573	4.54154	5.74713	4.53581	3.80745	3.74168	3.61807	4.18931	4.90247	5.65123	4.99629	5.41772	5.18239	1.9462	3.88357	5.41036	4.39477	3.99251	3.53889	3.93078	4.15578	5.22038	4.09827	5.042	5.0966
TAGLN3	4.89208	3.76773	5.59711	3.01399	4.70531	4.56615	1.91018	4.33252	5.00648	5.70678	4.52834	5.37015	2.87605	3.72499	4.2046	5.45241	4.49461	4.99409	5.29895	4.34285	2.02528	4.95615	3.64332	5.77732	5.89205	5.29139	1.99235	3.02487	5.33859	4.01564	5.21918	4.86464	4.36036	3.78903	3.79225	4.73439	4.72147	3.39172	5.23115	3.74254	4.97897	1.929	5.6127	2.85306	4.95535	4.06497	3.99637	4.81057	4.1458
LILRP2	3.33731	1.94309	4.1916	3.01399	4.18777	3.87261	4.11644	3.76174	2.83619	2.74558	4.31152	4.49279	3.32509	4.06802	4.61117	3.10641	3.87835	4.32061	3.26987	3.04216	3.66739	2.09185	3.92144	1.90676	3.02964	3.84738	1.99235	1.93755	3.80745	4.67334	4.50496	2.00993	2.90638	3.04222	3.31352	4.65104	4.22945	4.96027	2.71501	3.54301	1.94433	4.34892	4.28053	4.56482	3.21438	3.59256	4.09827	4.24356	4.04624
C5orf27	1.90756	1.94309	4.86648	1.97415	3.3381	4.32554	4.40684	3.76174	3.27328	3.1688	4.52834	3.79302	3.95492	4.06802	4.50999	4.04994	2.70643	4.95451	3.26987	3.50591	2.02528	2.09185	1.93492	4.29385	3.30008	1.94704	3.08578	4.11291	5.26879	3.89392	4.22638	3.8469	4.10254	3.50842	2.86137	3.03522	3.92561	4.23828	1.93243	4.01819	5.04228	3.79801	4.58834	5.22035	4.6919	5.29361	4.43482	3.78821	4.23001
MCF2	1.90756	4.04178	5.25115	3.47352	5.36614	3.51959	3.77562	3.88603	4.8592	5.14319	3.30279	1.92734	1.91747	4.18488	3.74614	4.1925	4.45744	4.82246	1.9385	3.98257	2.02528	2.09185	4.11194	5.28252	4.11834	3.36863	1.99235	3.02487	3.32862	3.26321	4.42858	4.04224	3.82961	3.50842	4.84832	3.03522	4.14547	2.9381	4.94038	2.8303	3.39408	3.05002	2.00463	3.93078	1.91913	1.9512	3.87339	4.05996	4.47277
PADI4	4.59484	4.22772	3.92657	1.97415	5.19121	3.51959	4.53545	3.40816	3.27328	5.11925	4.52834	3.31415	4.84597	3.72499	4.08826	5.0771	3.12583	5.06225	1.9385	5.14792	4.13978	5.05547	3.64332	3.56486	3.88359	1.94704	3.83167	3.96569	3.95832	5.13838	4.42858	4.79556	2.90638	4.42223	4.16123	3.77828	4.97395	3.39172	3.75895	4.5837	3.67499	3.05002	3.07584	3.30059	5.51136	1.9512	4.25929	4.43573	5.18562
ATP13A5	3.81606	5.16552	6.49084	5.68421	2.88928	5.44384	4.11644	5.6323	3.27328	3.64387	4.80924	4.61807	3.80398	5.18604	4.65429	4.96636	5.5404	5.21074	5.60137	5.68626	4.99952	4.82494	3.92144	1.90676	5.43676	6.27408	1.99235	5.18748	5.79736	5.38849	5.46807	4.61172	6.32324	4.93656	6.08399	4.69469	5.44551	6.66323	5.58094	4.50189	5.68612	5.07103	6.3801	5.5055	5.17439	4.32348	4.98542	1.91031	4.30254
PMP2	3.618	3.76773	3.44953	1.97415	4.0884	3.87261	3.49514	4.56837	4.12747	4.02474	4.23867	4.77044	3.32509	3.44411	3	4.64881	3.40036	4.59107	4.28311	1.96301	2.02528	2.09185	3.64332	2.83973	2.62465	5.45952	1.99235	4.11291	4.39702	2.822	3.89542	2.00993	3.35091	3.04222	4.24464	1.97323	3.57604	2.9381	3.88357	3.89549	4.24029	4.42873	3.81979	3.93078	4.29564	4.06497	5.04836	4.05996	4.5977
MUM1L1	6.08718	5.65344	3.92657	5.10429	5.37591	3.24255	5.67652	5.78077	5.66145	5.73643	3.30279	4.71582	5.59378	5.29904	5.47906	5.78284	5.9556	5.51623	3.74808	3.78684	2.02528	2.09185	5.25459	5.32546	4.05025	5.13895	5.06411	4.40592	5.63242	3.89392	5.43776	2.00993	4.36036	3.50842	5.58405	3.77828	5.56221	2.9381	4.67883	5.24936	5.14298	3.05002	5.47638	5.19051	5.94175	5.74566	4.63382	4.37947	5.90028
ESRRB	2.88546	1.94309	3.44953	4.8741	2.88928	1.9685	4.9807	3.88603	4.28736	4.25433	3.30279	3.59428	3.60551	3.44411	3	3.58086	3.12583	3.87538	3.26987	3.04216	2.02528	5.60152	3.16844	4.59055	4.40689	2.91775	4.02692	1.93755	2.87895	3.54254	3.61807	3.10119	2.90638	4.13066	3.59417	3.97446	5.25222	3.87038	1.93243	1.95988	2.93985	1.929	3.07584	3.58093	3.69169	4.97491	3.72024	3.78821	1.90037
TMEM139	5.00669	4.47396	5.97327	3.47352	3.3381	5.63786	3.77562	4.99596	5.19296	5.48703	5.69643	5.09736	4.33085	4.71236	5.31939	5.10739	4.79491	5.17565	5.78373	4.24687	4.13978	2.09185	3.16844	5.11228	4.50573	5.73719	3.08578	4.8198	5.53337	5.31161	5.01283	5.5134	5.69742	3.78903	4.43501	4.65104	5.30943	5.67351	4.50226	4.74035	5.88602	4.49728	5.64656	5.53672	4.63551	3.87218	4.09827	4.53151	4.30254
NPBWR1	5.15418	4.47396	4.1916	5.19234	5.47682	2.81296	5.70399	5.52939	5.85136	5.80928	5.66362	4.53847	4.88652	4.43104	5.39494	3.85914	6.0295	5.66552	5.49849	4.83875	2.02528	2.09185	3.16844	5.75474	5.74239	5.54051	5.29666	4.63732	5.58196	2.822	5.03245	4.30583	5.46913	4.13066	5.51108	5.0896	5.82091	4.74964	5.05023	4.34536	4.39477	3.05002	3.53889	4.23514	4.40564	5.24304	1.95233	5.29207	5.90352
NR2E1	4.83002	3.28928	5.51196	3.01399	5.62817	1.9685	3.02787	5.17843	5.20088	5.27	5.72168	1.92734	4.9404	5.17622	3.94133	4.04994	4.41717	4.32061	3.26987	1.96301	4.99952	2.09185	4.11194	4.35767	3.49879	4.97946	1.99235	5.32024	1.91666	5.29031	1.88593	3.8469	1.97841	5.16478	5.20405	4.98319	5.02674	2.9381	3.60463	4.76591	5.45545	5.85999	5.55054	5.04655	1.91913	4.41686	4.81595	4.70816	4.81978
FAM163A	4.34041	4.22772	1.91915	1.97415	1.93233	2.81296	3.49514	3.13336	2.83619	4.60054	3.93313	3.59428	4.45018	4.18488	3.74614	4.04994	4.14564	4.09764	2.83132	3.04216	2.02528	2.09185	4.53461	4.89204	3.77894	3.84738	3.55091	1.93755	4.72434	3.89392	4.33768	3.10119	2.90638	4.42223	3.59417	3.4973	4.36524	1.9462	3.75895	5.06552	2.93985	4.55717	2.00463	3.58093	3.21438	3.59256	4.18462	4.24356	4.89744
CEACAM7	6.14575	5.71651	5.42839	5.97831	1.93233	5.28377	3.97022	5.50402	5.52703	5.46298	6.0005	5.85626	4.74987	5.96408	5.83377	6.03455	5.38145	6.28872	6.17261	6.25091	6.20958	4.74055	4.11194	3.56486	4.81313	5.04077	1.99235	6.12175	6.18684	6.46272	5.03245	3.56604	6.03355	6.03746	5.04673	5.89332	4.87713	6.04693	6.2224	4.11976	5.32423	6.11867	6.09528	5.30721	6.07921	4.99765	5.97064	5.33542	5.78705
SYN3	5.08254	4.04178	3.44953	1.97415	4.0884	3.99593	4.58843	3.98932	3.75112	5.46018	1.92328	1.92734	3.95492	4.49176	3.74614	5.22774	4.2718	4.68308	3.74808	3.50591	3.66739	2.09185	3.16844	4.89204	4.50573	5.36898	3.55091	4.32529	3.32862	4.53581	4.76395	3.8469	5.08016	3.50842	5.02239	3.03522	5.42853	3.87038	2.71501	1.95988	4.7805	5.10117	3.07584	3.30059	3.21438	3.12125	3.52065	4.37947	2.84807
INSC	2.88546	4.6365	3.44953	4.21806	4.0884	1.9685	4.67864	3.13336	4.21328	5.02514	3.78158	2.8677	2.87605	3.44411	4.2046	4.04994	4.41717	4.32061	2.83132	4.12998	2.02528	2.09185	1.93492	4.62572	3.02964	1.94704	3.08578	4.11291	4.07861	2.822	4.76395	2.00993	2.90638	3.78903	4.88659	1.97323	4.4214	1.9462	3.13143	5.08784	2.93985	3.99251	2.00463	4.23514	3.96772	4.56284	3.72024	3.93938	4.1458
TREML3	3.9665	5.68841	3.73054	5.72366	2.88928	1.9685	4.11644	3.60751	3.75112	4.75438	3.58274	3.79302	4.50041	4.83164	4.56339	5.12161	3.12583	3.99712	1.9385	4.4237	4.87504	5.13456	5.65421	5.01227	3.02964	4.11812	3.55091	3.02487	3.60908	4.57434	4.42858	4.482	3.35091	4.2468	3.59417	3.97446	4.97395	4.02043	4.8042	4.20586	3.87268	1.929	3.07584	5.7622	3.96772	4.20942	4.38278	3.58965	2.84807
LEP	3.618	3.28928	4.49978	1.97415	2.88928	4.63634	1.91018	4.67748	3.75112	1.93246	4.48257	4.24944	4.33085	2.98019	5.29891	4.1925	4.37322	3.52413	3.90057	4.12998	5.13311	2.09185	3.92144	4.29385	3.6535	2.91775	3.08578	3.48943	4.45306	3.89392	3.14209	4.75628	4.10254	3.50842	5.81299	1.97323	3.77455	4.13991	4.15171	1.95988	4.02267	5.60482	5.87412	2.85306	3.21438	4.56284	3.72024	3.93938	1.90037
PURG	5.02076	4.70003	3.44953	1.97415	3.81697	3.51959	4.8708	4.701	3.27328	2.74558	4.23867	4.49279	3.32509	1.89913	4.30003	4.30479	4.9054	1.89419	2.83132	3.50591	2.02528	3.57965	4.83293	4.55237	4.40689	2.91775	3.55091	3.77023	2.87895	3.26321	4.42858	3.10119	4.20263	1.93815	3.79225	3.77828	4.47164	2.9381	3.60463	1.95988	4.02267	4.13858	2.00463	3.77951	1.91913	3.87218	3.87339	4.15945	4.04624
IL19	4.66693	3.76773	4.49978	1.97415	1.93233	3.87261	3.77562	4.42459	3.27328	3.64387	4.8914	3.79302	3.32509	5.6359	4.44962	5.84851	4.37322	5.67867	5.85104	5.59727	4.79493	2.09185	3.92144	3.28494	4.53449	4.43571	4.02692	5.29771	5.58856	5.77356	4.22638	3.56604	3.98136	4.49121	4.31651	5.375	4.30188	5.39653	4.59914	4.11976	4.7805	4.42873	4.37669	4.70023	5.49108	3.12125	3.87339	4.85348	3.77426
TXNDC3	2.88546	1.94309	4.28787	3.01399	3.81697	1.9685	4.32696	4.59828	2.83619	1.93246	3.78158	3.79302	4.07535	3.92061	4.2046	4.53998	3.87835	4.25629	2.83132	1.96301	4.39818	2.09185	1.93492	3.56486	3.88359	2.91775	3.08578	3.02487	1.91666	3.89392	4.42858	2.00993	1.97841	4.13066	4.37931	4.5486	4.30188	1.9462	2.71501	3.89549	3.87268	4.25416	3.07584	2.85306	4.29564	3.59256	4.32473	4.37947	4.30254
SULT1B1	4.59484	5.18264	4.1916	1.97415	2.88928	4.32554	1.91018	3.13336	3.55175	4.1879	5.45774	3.79302	4.33085	4.06802	4.95879	4.80726	4.32503	5.07246	3.26987	5.12083	4.39818	2.09185	4.60063	3.56486	1.89017	4.73217	4.46645	4.58941	4.45306	4.11626	5.36549	4.40142	4.61935	5.06852	3.79225	1.97323	3.29573	4.02043	4.72491	4.5837	5.47133	3.05002	4.37669	3.93078	4.98181	1.9512	3.87339	4.70816	4.5977
MAP3K15	3.88231	4.10033	4.30431	4.12698	4.66664	2.85665	3.06528	4.26164	2.85885	4.2012	3.83101	4.52432	3.62605	4.39615	4.42178	1.88175	3.77693	4.5733	4.66799	4.94036	4.4043	2.09185	1.93492	3.32155	5.73526	3.87577	3.60428	3.06201	4.64827	2.83928	4.529	3.86719	5.42792	3.09156	4.20625	3.04774	2.85298	3.70851	3.87444	2.87475	4.0486	4.513	2.00463	4.40127	1.91913	3.63629	4.33925	3.81003	3.31569
SHISA7	3.81606	4.47396	3.44953	4.96717	5.15495	4.18486	5.12097	4.15321	4.12747	5.73037	4.15409	5.37938	5.02933	5.31875	3.94133	3.58086	1.91133	4.55557	4.34776	4.65575	3.66739	4.50447	4.45767	3.76371	4.7505	4.62781	3.83167	3.96569	3.32862	4.4475	3.61807	5.20304	5.22564	3.04222	3.94271	3.03522	4.91223	4.23828	4.78575	4.40322	4.14201	3.79801	3.53889	4.82478	4.89619	3.59256	3.24311	2.86145	4.30254
PKHD1L1	3.81606	4.04178	4.4388	4.1	3.3381	2.81296	3.49514	4.33252	3.27328	3.44434	5.13914	4.71582	1.91747	5.15568	3.94133	5.35746	3.40036	4.99409	4.73941	4.83875	2.02528	2.09185	3.64332	3.28494	5.05261	3.84738	3.55091	4.87496	4.95888	4.77753	5.40982	3.56604	4.20263	4.42223	5.29342	3.03522	4.72147	3.6726	3.13143	4.61971	3.67499	4.55717	3.81979	4.98149	3.96772	3.12125	3.99637	5.31451	5.41062
NKAIN2	5.61048	5.82287	4.91236	6.24394	5.6202	4.32554	4.9993	5.79041	4.79468	4.7089	4.8314	4.44225	4.1746	5.7634	5.59846	5.75798	5.39758	5.26564	4.89058	5.44456	4.57012	5.89632	6.21977	4.29385	5.82051	5.11684	4.02692	5.1982	3.32862	5.71412	5.06871	5.78784	5.68514	3.50842	5.90236	5.98156	4.95946	3.6726	6.0747	4.01819	3.67499	5.05495	3.53889	6.02824	3.69169	5.4459	6.32312	4.37947	3.77426
DGKB	4.75648	4.84805	3.73054	1.97415	4.76336	4.09811	4.32696	5.01704	4.12747	3.1688	5.38473	2.8677	1.91747	5.0289	4.79299	4.53998	4.59098	3.52413	5.53382	4.94263	2.02528	2.09185	4.60063	4.35767	5.16282	5.73157	4.02692	4.22956	4.5032	4.39636	4.89477	4.04224	3.63064	4.91326	4.31651	1.97323	2.84719	3.6726	4.91396	1.95988	4.39477	4.13858	4.16341	4.42747	4.57086	4.06497	4.66506	2.86145	3.92554
SGK2	4.27622	1.94309	5.05462	4.52898	3.81697	4.43625	4.11644	3.61269	1.95319	5.34871	3.58274	4.86581	4.1746	4.07059	3.7552	4.69445	4.53102	2.80323	4.90818	3.04216	2.02528	4.05762	4.11194	5.01318	4.47504	5.55201	3.55091	5.65605	4.39702	5.60641	4.57048	2.00993	4.53888	4.55422	3.79225	3.77828	5.07532	3.87713	3.13143	3.26485	4.68483	3.79801	3.07584	3.77951	3.69169	4.49539	2.81055	4.64878	3.58707
GAL3ST1	3.33731	4.04178	2.98693	3.95132	4.0884	1.9685	3.49514	4.46486	3.90389	4.94088	2.8573	4.49279	1.91747	4.36154	4.08826	4.3966	3.12583	2.80323	4.90818	1.96301	3.66739	5.22857	1.93492	4.41428	5.11535	4.94459	3.55091	3.96569	3.60908	3.74168	4.33768	4.18931	1.97841	3.50842	4.70458	1.97323	4.59623	3.87038	3.40523	1.95988	4.14201	4.93993	5.09541	3.93078	3.21438	4.62168	3.72024	3.30932	3.77426
GDF5	4.34041	3.28928	5.08294	4.1	4.34408	4.25981	5.15746	4.15321	5.00648	4.3133	4.38365	5.78703	4.72189	3.72499	4.95879	3.85914	3.12583	5.06636	5.26395	3.04216	2.02528	2.09185	4.53461	4.03637	5.49039	3.84738	4.1739	4.75595	5.18772	4.45615	1.88593	4.90259	4.83563	5.23005	3.59417	3.77828	3.57604	5.15303	5.16978	4.71318	4.14201	4.13858	5.07632	5.34778	3.69169	4.20942	3.52065	4.24356	4.40173
CYP2C9	3.9665	3.76773	4.64555	3.01399	4.18777	5.41391	4.11644	4.42459	3.75112	3.1688	4.31152	3.59428	1.91747	4.7456	5.74487	5.46175	5.59973	4.37771	4.73941	4.60769	4.94211	2.09185	4.79564	1.90676	4.40689	4.21709	1.99235	5.24725	5.76829	5.61895	5.18444	5.04161	4.97704	4.42223	3.59417	4.33629	4.69343	5.17364	4.88559	2.8303	4.97897	3.99251	5.00044	4.42747	4.7417	3.12125	4.63382	3.30932	4.69518
CRB2	3.81606	4.56236	4.9723	4.39697	5.36614	3.51959	4.58843	4.07721	5.66145	4.02474	4.78575	3.59428	3.80398	4.92327	4.61117	5.18474	3.98165	5.14463	4.34776	4.24687	2.02528	5.25516	3.16844	5.01227	5.6519	4.66543	3.08578	4.22956	3.95832	4.87888	4.86595	4.30583	3.82961	5.45842	4.52986	3.03522	4.74774	3.39172	3.88357	3.54301	3.67499	4.61014	3.53889	4.63772	3.69169	4.86748	4.74718	4.94375	5.55769
C1orf61	5.37802	3.28928	4.1916	3.95132	4.18777	3.99593	3.02787	3.40816	3.27328	5.48186	4.52834	2.8677	3.32509	4.90233	3.74614	4.47376	3.12583	4.59107	2.83132	1.96301	4.99952	2.09185	5.04658	4.22093	3.6535	3.64917	3.08578	1.93755	3.32862	4.39636	5.67472	2.00993	3.82961	4.13066	4.43501	1.97323	4.95946	5.47104	3.13143	2.8303	4.80811	1.929	4.90272	5.30721	3.21438	1.9512	3.87339	4.31603	4.1458
GDF1	5.10048	4.52637	4.396	4.11558	4.31062	2.89814	3.76177	4.52222	4.74663	4.78905	3.01318	4.66546	1.91747	4.01775	4.68936	4.67406	3.61523	3.7485	4.34841	3.72174	3.73977	2.09185	1.93492	5.05573	2.96605	3.23794	4.15146	3.97239	3.80231	3.74339	3.82169	4.61058	3.14113	3.04222	4.7551	1.97323	4.14729	5.04459	4.49246	1.95988	3.4906	4.37012	4.55764	3.09872	5.03403	4.83868	3.61162	3.1953	1.90037
RIMS4	5.49002	5.22929	3.44953	4.84698	4.4635	3.24255	5.12097	3.13336	4.97829	6.19032	4.73438	4.65317	4.45018	4.54543	5.64987	5.43776	5.623	5.75324	4.12367	4.80795	4.13978	4.05762	5.24334	5.18967	5.00354	3.84738	3.08578	5.63521	3.95832	4.49371	5.46325	2.00993	4.10254	3.98401	5.42232	4.41758	2.84719	2.9381	5.23115	4.5837	3.87268	5.76426	2.00463	5.67518	5.2753	4.89726	4.32473	4.31603	4.84068
LOC100132111	5.41409	4.56236	5.40435	3.75463	3.96802	5.34072	3.77562	4.701	5.37774	3.1688	3.78158	3.79302	4.80074	4.59347	5.02856	4.72167	4.98898	4.51703	3.74808	4.69913	3.66739	4.325	3.64332	5.28755	4.62582	5.5911	3.08578	4.11291	4.2616	3.89392	3.61807	5.82714	5.4917	3.78903	4.60759	4.60266	4.81616	4.02043	3.88357	4.11976	4.24029	3.51406	4.70084	4.05141	4.92694	5.56821	4.92116	4.37947	5.20087
PCDHAC2	5.75892	3.28928	1.91915	4.8001	1.93233	3.51959	5.05337	2.71364	4.02626	1.93246	4.47821	3.31415	5.29504	4.93883	5.06803	4.79425	4.16174	5.53296	4.0227	3.98257	2.02528	5.07012	4.55475	4.79335	3.70148	4.27857	4.29458	4.82363	4.53268	4.37378	1.88593	4.43442	2.97956	3.04222	5.51139	4.67252	4.71463	3.6726	3.98721	3.99557	2.93985	5.57459	2.00463	4.9952	4.80435	3.12125	3.87339	5.66278	5.32112
CKMT2	3.9665	3.76773	5.39929	3.47352	4.51373	5.51323	5.99133	3.60751	6.11009	4.02474	4.05421	4.58003	3.95492	3.44411	3.74614	4.47376	3.98165	4.87743	5.25682	3.50591	2.02528	2.09185	3.16844	5.93234	3.6535	4.37271	5.81506	3.48943	4.2616	4.01564	3.89542	5.04161	4.94155	3.50842	4.16123	1.97323	2.84719	5.40146	3.88357	4.01819	4.7805	4.61014	5.41195	4.82478	6.0725	6.35884	4.85618	4.31603	4.7233
CDH16	5.8375	5.93085	6.22374	5.42748	6.01335	5.85822	4.75315	5.30922	5.22357	4.63024	5.44737	5.23762	5.36682	5.81497	4.93905	4.59777	5.50179	5.05178	4.0227	5.22877	6.14461	5.0089	4.79564	4.03637	2.62465	5.56034	4.53565	6.11395	6.06707	4.11626	5.79355	4.61172	6.38659	1.93815	5.44313	4.5486	4.55837	4.74964	5.1417	5.37152	5.73101	4.65749	5.62861	4.93608	5.71415	5.57988	5.16562	3.93938	5.40682
CCDC154	5.42034	3.28928	5.18765	1.97415	5.14524	5.40186	3.77562	4.27931	4.12747	4.02474	5.34271	3.59428	3.32509	3.92061	5.04408	4.47376	3.75402	4.18284	5.2084	1.96301	4.79493	3.57965	3.64332	4.13635	4.91467	5.44348	1.99235	3.77023	4.17783	4.98715	4.72322	4.92377	4.53172	5.52901	4.48486	4.12249	4.7724	5.88238	3.75895	3.54301	5.64226	4.80738	5.38469	4.3077	1.91913	5.03934	3.24311	4.43573	4.94686
LOC283731	1.90756	4.70003	2.98693	3.01399	4.6004	3.51959	4.53545	4.15321	4.58946	4.53459	4.15409	4.53847	4.82397	3.92061	4.76242	3.58086	4.49461	4.98138	3.74808	1.96301	2.02528	2.09185	3.92144	4.83496	3.88359	4.73217	1.99235	4.40592	3.80745	4.27495	3.14209	2.00993	2.90638	4.80316	4.24464	1.97323	3.77455	3.39172	3.40523	3.54301	2.93985	4.93993	2.00463	4.3077	4.40564	4.62168	4.43482	4.37947	2.84807
C6orf176	4.50883	1.94309	2.98693	1.97415	1.93233	3.99593	4.53545	3.88603	3.27328	3.92182	4.84791	4.65317	3.32509	3.44411	3	4.30479	3.12583	4.74006	1.9385	4.80988	2.02528	3.57965	1.93492	3.19459	3.30008	4.97946	3.08578	4.31022	3.80745	3.74168	4.42858	3.8469	2.90638	1.93815	4.48486	1.97323	3.52569	4.02043	4.07537	1.95988	4.14201	3.05002	2.00463	1.90476	5.25287	3.12125	3.72024	3.30932	4.7233
C22orf34	4.66693	1.94309	1.91915	3.75463	4.4635	1.9685	3.97022	5.16531	1.95319	3.1688	4.05421	4.24944	3.32509	4.43104	5.19057	5.12161	4.41717	3.52413	2.83132	3.50591	2.02528	2.09185	4.36611	3.91532	4.47504	3.64917	4.02692	4.11291	3.80745	4.8414	4.33768	3.8469	1.97841	4.13066	4.24464	4.23987	3.92561	2.9381	3.40523	3.54301	3.87268	3.79801	4.90272	2.85306	3.96772	1.9512	3.99637	4.97461	5.27988
SPAG6	3.33731	3.28928	3.44953	3.95132	4.34408	3.24255	3.49514	5.11486	4.02626	2.74558	4.37535	4.24944	4.1746	5.45044	3.46539	3.85914	4.06954	4.09764	4.28311	3.04216	3.66739	3.57965	4.95458	1.90676	3.02964	1.94704	3.83167	3.02487	5.55633	5.6593	4.22638	2.00993	1.97841	3.98401	4.57081	3.97446	3.77455	2.9381	3.13143	3.54301	3.67499	3.05002	5.09541	5.69467	3.96772	1.9512	3.52065	3.58965	5.30772
LRIT2	3.33731	3.28928	3.73054	3.47352	4.2717	3.99593	4.96116	3.76174	3.90389	4.86672	3.58274	4.32213	1.91747	4.28074	4.76242	3.85914	4.91741	4.09764	1.9385	3.78684	4.13978	2.09185	3.16844	3.76371	4.17888	1.94704	3.08578	1.93755	4.39702	3.26321	4.08505	2.00993	4.65761	3.04222	3.31352	1.97323	2.84719	3.39172	3.88357	5.02923	2.93985	1.929	3.53889	3.58093	4.15578	4.06497	1.95233	3.58965	4.47277
P2RY12	3.9665	4.80433	3.44953	4.52898	3.96802	2.81296	4.67864	4.56837	3.27328	3.44434	4.60814	3.31415	5.21016	4.90233	4.79299	4.1925	4.67023	4.73495	4.0227	3.78684	2.02528	2.09185	4.60063	3.56486	4.89169	1.94704	4.87941	4.47524	3.32862	4.89637	3.89542	2.00993	1.97841	4.86198	4.90435	4.5486	4.4214	1.9462	3.40523	5.06552	4.02267	4.96174	2.00463	4.91961	4.29564	3.59256	4.25929	5.35974	5.14404
LRRIQ1	5.21327	4.3657	4.28787	4.46744	3.96802	3.24255	3.97022	5.07372	4.28736	4.53459	4.37535	6.19414	4.1746	5.04386	4.99533	4.64881	3.87835	4.32061	4.65295	4.24687	2.02528	2.09185	1.93492	3.91532	5.28567	4.90622	1.99235	1.93755	5.25548	5.40404	3.14209	4.89527	4.65761	5.2584	4.06248	4.23987	4.14547	4.68341	1.93243	5.02923	3.67499	3.99251	5.2852	5.34778	4.29564	3.87218	2.81055	4.31603	5.10663
VSIG8	4.91077	6.03793	4.98518	3.02015	5.05593	4.48355	5.44259	2.71364	5.13159	4.63024	5.22199	5.20014	5.30979	5.78059	4.46231	5.65629	5.92239	5.08234	5.47117	5.73341	6.64147	5.34484	5.00345	3.28494	3.49879	6.05352	4.59609	6.28176	6.0021	4.60987	4.62763	3.10119	6.35649	1.93815	5.55071	4.48753	4.51706	5.13109	5.78181	5.2846	6.5976	3.05002	5.1275	4.7283	4.49546	4.20942	2.81055	5.84407	5.26799
RPSAP52	4.66693	4.70003	5.51876	4.21806	5.10341	3.99593	5.27304	3.98932	5.28965	5.61096	3.58274	4.8408	5.2922	4.06802	4.44962	4.04994	3.98165	3.99712	4.40516	3.04216	5.45005	2.09185	5.04658	5.57762	4.76709	5.14952	4.90787	4.40592	5.48401	3.89392	3.14209	5.55859	4.53172	4.34202	1.88259	6.01444	5.24589	4.51092	4.67883	5.36219	5.05653	4.13858	5.23277	4.15098	5.20267	5.19609	3.52065	4.78727	5.02948
BCL8	4.80697	4.70003	2.98693	4.75294	5.01565	3.99593	3.97022	4.65265	3.27328	5.44279	4.43191	2.8677	5.70709	4.71236	4.72938	5.28297	4.06954	3.52413	1.9385	1.96301	3.66739	2.09185	5.11989	5.65124	3.97281	4.62781	4.02692	3.02487	4.07861	1.91419	4.99207	2.00993	4.42429	4.88847	4.80589	3.97446	5.00129	5.77534	5.37333	4.34536	4.60686	3.99251	2.00463	4.98149	3.69169	3.59256	3.24311	4.15945	4.63268
MESP2	5.48691	5.06437	4.75488	3.01399	5.15495	3.51959	4.53545	4.8364	5.51313	2.74558	5.39332	3.59428	4.58704	3.72499	4.76242	4.73563	5.68235	5.49129	4.0227	1.96301	4.99952	4.82494	4.79564	5.13108	4.05025	3.36863	4.02692	4.11291	3.32862	5.26151	5.28799	4.482	3.35091	3.98401	5.28209	5.02213	4.94437	5.05566	4.90001	5.40629	4.64757	4.49728	4.69048	4.05141	4.29564	5.65117	2.81055	5.22773	4.36608
ZCCHC5	4.08637	4.47396	3.44953	3.01399	3.3381	3.24255	4.84447	4.59828	2.83619	2.74558	4.05421	4.0653	4.07535	4.06802	3.74614	4.3966	3.12583	4.18284	1.9385	3.50591	2.02528	2.09185	5.02567	4.46493	5.10892	2.91775	4.46645	4.63732	2.87895	4.33927	3.61807	3.8469	1.97841	4.60468	2.86137	3.03522	2.84719	2.9381	4.83875	4.20586	1.94433	3.51752	3.53889	3.30059	4.29564	3.59256	3.99637	4.15945	3.92554
DUSP26	3.81606	4.04178	4.86648	4.39697	4.91892	3.87261	6.03356	3.98932	6.18675	4.36622	4.52834	3.59428	4.82397	4.36154	4.61117	4.59777	3.12583	4.91019	3.90057	3.04216	2.02528	2.09185	3.92144	5.99931	3.49879	4.54154	5.76411	5.11476	4.39702	4.98715	5.33683	3.56604	4.20263	4.73441	5.51628	3.4973	4.47164	4.32138	3.13143	4.11976	4.45722	4.49728	3.81979	4.98149	5.93397	6.35592	5.38668	4.37947	5.34763
RSPO4	4.63238	4.22772	3.92657	4.78669	5.58796	2.81296	4.40684	4.72324	4.55051	6.21634	4.8914	4.44225	5.51278	3.44411	4.3805	5.83742	4.14564	5.28728	2.83132	3.50591	2.02528	5.41557	5.06637	6.29604	4.6766	4.54154	1.99235	3.96569	3.60908	3.26321	5.35151	4.71307	1.97841	4.60468	5.44974	3.03522	5.56003	3.87038	3.98721	4.50189	4.02267	5.33186	3.07584	4.7283	3.96772	1.9512	3.72024	3.58965	5.34763
FAM196B	5.33918	5.04013	1.91915	3.75463	3.61849	4.18486	5.63903	4.78374	3.55175	5.72623	4.23867	3.31415	4.62482	4.06802	4.30003	4.80726	4.32503	4.51703	3.74808	3.50591	2.02528	2.09185	5.16623	4.89204	4.93635	4.21709	4.1739	4.89991	3.60908	4.39636	4.50496	4.83152	1.97841	4.13066	4.16123	1.97323	5.57485	3.87038	4.7025	4.11976	3.87268	1.929	2.00463	4.84571	4.40564	3.12125	1.95233	4.57293	3.57564
PCDH10	4.9923	5.41185	4.78579	3.01399	4.34408	3.87261	4.40684	5.76348	4.89708	5.3723	5.49883	5.46556	4.1746	3.44411	4.30003	4.9204	5.61596	5.43989	3.26987	3.50591	2.02528	2.09185	3.92144	4.62572	3.88359	5.83447	6.57677	3.96569	3.32862	4.33927	5.87665	3.56604	3.82961	3.98401	4.37931	3.03522	5.41421	4.02043	4.91396	4.01819	4.60686	3.99251	3.53889	3.30059	4.92694	1.9512	3.24311	4.64575	4.30254
FAM184B	5.56696	4.24783	5.57679	4.37058	5.53771	6.10176	4.97651	5.14793	5.33611	4.89093	5.66937	5.82357	3.38433	4.70434	5.46228	4.73127	5.47378	5.52324	5.72946	5.43723	2.02528	5.57429	4.39634	5.67586	4.56341	5.35687	4.04344	1.93755	5.51662	5.10575	5.31814	6.02452	5.92714	3.83322	5.79939	3.57274	5.16518	6.09592	3.81433	2.86907	4.28757	4.62678	5.52024	3.61916	5.15366	4.80152	4.95809	1.91031	5.08563
C4orf7	4.83002	4.80433	6.17183	4.31511	5.48687	5.46445	4.71753	6.17041	5.55537	4.1879	6.18542	6.12462	6.10541	5.52517	6.1107	5.76935	5.28478	5.84699	6.0313	4.86739	5.36812	5.05547	4.70912	5.68894	5.29311	5.85324	1.99235	4.58941	6.43339	5.66809	5.29668	4.18931	6.08457	6.98496	5.27036	4.98319	4.59623	6.24279	5.19571	6.0359	6.00177	4.34892	6.26343	6.2812	5.72085	3.87218	6.0349	6.37384	6.46891
KRTAP5-9	4.40331	1.94309	2.98693	3.95132	4.5591	4.09811	3.49514	4.46486	3.55175	3.79783	4.43191	4.38583	2.87605	4.88017	3.74614	4.1925	5.31914	5.30748	5.37379	1.96301	2.02528	5.44588	3.92144	1.90676	4.79837	3.64917	1.99235	3.02487	3.80745	5.41883	5.06871	5.65931	3.63064	4.88847	3.79225	4.83523	4.04609	5.48977	1.93243	4.01819	4.45722	3.79801	3.53889	4.05141	3.96772	5.03934	5.27151	4.94375	3.92554
GUCY2D	4.08637	4.3657	3.73054	4.71628	5.14524	3.51959	4.2321	5.547	4.02626	5.52529	3.93313	2.8677	4.45018	5.59843	5.56138	4.80726	5.2612	4.51703	3.74808	5.28531	5.64348	5.57429	4.60063	4.89204	5.05261	4.66543	3.55091	4.11291	4.17783	4.33927	5.56066	2.00993	2.90638	3.50842	4.93761	3.97446	5.64636	4.23828	3.13143	4.92767	4.02267	5.4185	4.37669	4.75464	4.15578	5.05852	3.87339	3.78821	4.04624
RASGEF1C	5.03381	3.28928	3.92657	3.01399	3.3381	1.9685	3.49514	2.71364	4.28736	4.75438	4.15409	2.8677	5.08973	4.06802	3	1.88175	3.59982	4.18284	1.9385	1.96301	4.13978	5.30293	3.16844	5.31006	3.49879	4.11812	3.08578	3.02487	4.07861	3.54254	5.52421	3.8469	4.20263	1.93815	2.86137	3.4973	4.55837	5.39653	3.40523	2.8303	4.02267	3.51752	3.53889	2.85306	3.69169	3.12125	3.72024	2.86145	3.77426
KCNK4	4.18513	3.28928	2.98693	3.47352	3.81697	4.56653	3.49514	3.88603	2.83619	5.12058	3.30279	3.59428	3.32509	1.89913	4.30003	3.99185	2.70643	4.05362	2.83132	1.96301	5.30508	3.57965	1.93492	4.32802	3.90624	2.91775	1.99235	3.48943	1.91666	3.85912	3.61807	3.62591	1.97841	5.4735	3.31352	1.97323	4.61331	4.87978	2.71501	3.68295	3.39408	3.05002	4.88429	2.85306	3.21438	3.59256	4.47283	2.86145	4.20931
CLEC12B	1.90756	1.94309	4.4388	4.31511	4.2717	1.9685	3.77562	4.15321	4.58946	4.68423	4.95918	1.92734	4.25854	3.44411	4.76242	4.77301	4.41717	2.80323	1.9385	3.04216	3.66739	2.09185	4.11194	3.56486	3.02964	3.36863	3.55091	3.02487	4.33387	4.70191	5.08552	4.40142	3.82961	3.98401	3.59417	5.07384	5.09363	4.23828	3.40523	3.74254	4.75095	3.51752	4.95461	3.30059	4.7862	5.61943	4.79426	4.37947	3.57564
DCDC1	4.85455	4.04178	2.98693	4.1	4.45333	4.18486	3.77562	4.46486	3.27328	4.27274	3.58274	4.44225	4.33085	4.63226	4.3805	3.58086	4.26273	3.24469	3.54873	4.4237	2.02528	2.09185	4.11194	1.90676	4.24609	4.58669	1.99235	3.77023	3.32862	4.07614	3.61807	3.56604	3.35091	3.04222	4.43501	1.97323	4.42454	3.6726	3.13143	3.54301	3.39408	4.25416	4.01569	4.0924	1.91913	4.18202	3.87339	1.91031	2.84807
FCAR	5.1633	3.76773	4.86648	3.47352	1.93233	4.32554	3.77562	3.88603	4.50808	5.54677	5.25673	4.53847	4.72189	4.59347	3.46539	5.51588	4.59098	5.53242	3.26987	5.0424	2.02528	2.09185	5.19398	5.34012	4.44216	4.58669	3.83167	3.77023	3.32862	5.13838	4.72322	4.89527	3.82961	4.88847	3.94271	3.03522	4.66341	5.01102	3.98721	3.74254	4.80811	4.13858	3.53889	4.23514	5.68284	1.9512	4.18462	4.15945	3.77426
ZNF541	5.42813	1.94309	5.63678	1.97415	3.81697	3.71919	4.58843	4.8829	3.27328	2.74558	5.52943	3.59428	4.25854	4.36154	4.89622	4.04994	4.2718	4.68308	5.56057	3.78684	3.66739	2.09185	3.92144	4.03637	4.6766	5.34709	1.99235	3.02487	5.37763	4.53581	5.49102	3.56604	1.97841	3.98401	4.06248	4.12249	4.36524	4.60531	4.53684	3.54301	5.1204	5.0019	5.55054	4.47784	3.96772	4.62168	4.09827	4.70816	4.23001
SPDEF	2.88546	3.76773	5.85448	4.39697	4.90009	5.08662	4.32696	5.54125	4.68941	5.36849	5.82674	5.42562	4.90533	5.83477	4.93905	5.14833	4.8609	5.97541	5.57414	4.60769	5.62038	2.09185	3.16844	4.98568	3.49879	3.99806	3.83167	5.41328	6.07853	5.50792	4.42858	4.40142	5.52257	5.1766	5.11095	5.7128	5.38726	5.75882	3.40523	5.63135	5.68787	6.30196	5.15691	6.07569	5.65005	4.62168	3.99637	3.30932	4.86054
C2orf39	3.33731	5.08707	1.91915	5.04206	5.08048	3.87261	4.40684	4.78374	4.58946	3.1688	3.93313	4.61807	3.60551	5.4545	3	3.58086	4.32503	3.52413	3.90057	4.24687	2.02528	2.09185	4.97983	4.13635	1.89017	3.84738	4.02692	3.48943	5.328	5.45598	4.22638	4.30583	3.63064	3.50842	3.79225	4.23987	4.36524	3.87038	4.21878	3.89549	3.39408	3.51752	2.00463	5.62753	4.57086	4.32348	4.74718	3.30932	5.31821
ZYG11A	5.51651	5.16552	5.86319	3.01399	4.97038	5.33847	4.11644	5.36405	5.5833	5.67946	5.9037	4.53847	2.87605	5.18604	5.38448	5.00724	5.56051	4.47496	5.15166	5.18494	4.6964	2.09185	4.53461	4.03637	5.3004	5.73719	4.02692	4.63732	5.04426	4.92911	5.72593	6.10872	6.00608	5.35185	5.79338	1.97323	4.7724	5.19307	4.82183	2.8303	5.63596	4.13858	5.1841	4.42747	4.49546	4.62168	4.83658	4.76255	5.65241
OPN4	4.40331	3.28928	3.44953	1.97415	2.88928	3.71919	4.11644	3.60751	3.90389	4.63024	4.78575	2.8677	3.60551	3.92061	4.08826	3.58086	4.2718	4.82246	4.40516	3.98257	2.02528	2.09185	3.92144	1.90676	4.11834	4.58669	3.08578	3.96569	2.87895	4.20142	4.22638	4.97529	1.97841	1.93815	4.57081	3.03522	4.22945	4.45549	4.62731	2.8303	4.39477	1.929	4.01569	2.85306	4.49546	3.87218	3.24311	3.58965	3.77426
SLCO4C1	4.92854	5.3064	4.64555	4.78669	3.61849	3.87261	3.97022	6.29717	3.27328	3.92182	5.06621	4.49279	4.1746	6.00668	5.73209	5.37663	5.81012	6.01547	5.90316	5.29382	2.02528	2.09185	5.91485	4.97161	5.35612	3.36863	3.83167	5.10098	5.82576	4.86058	5.9713	3.10119	4.78415	5.19902	6.03835	3.97446	4.04609	4.71779	4.56907	4.76591	4.75095	5.49789	3.81979	5.84095	5.28594	4.83533	6.10683	5.01653	4.63268
HTRA4	4.18513	4.3657	5.21641	3.01399	4.4635	4.18486	3.49514	4.07721	3.27328	3.79783	4.60814	3.59428	5.01592	5.01329	5.01232	3.58086	4.45744	3.99712	4.45659	3.50591	4.39818	2.09185	5.54573	4.46493	4.2826	4.78986	3.55091	3.96569	4.2616	4.64276	5.3214	2.00993	3.63064	4.99892	3.59417	4.77075	4.4214	5.14224	2.71501	3.54301	4.68483	5.07103	2.00463	4.47784	4.29564	1.9512	4.87487	4.73622	4.04624
KLHL38	3.9665	4.22772	3.73054	1.97415	2.88928	4.32554	5.24777	4.07721	5.14106	5.70789	4.80924	4.65317	4.39411	3.92061	1.9036	4.1925	3.12583	1.89419	3.90057	1.96301	2.02528	2.09185	3.16844	4.81392	2.62465	1.94704	5.14567	3.96569	2.87895	3.26321	3.61807	3.8469	3.98136	3.98401	3.59417	1.97323	4.30188	4.13991	3.13143	4.81275	2.93985	5.41306	2.00463	3.77951	4.40564	5.46782	4.32473	3.78821	2.84807
C8orf47	3.33731	4.75542	4.78579	4.98732	4.51373	4.09811	3.49514	5.86721	3.27328	4.11223	4.15409	5.07501	4.45018	5.30574	4.2046	5.41701	5.41284	5.37326	4.81114	5.27654	2.02528	5.98884	5.43462	4.22093	4.2333	4.11812	3.83167	3.77023	5.51693	4.67334	5.75596	2.00993	4.57758	5.18799	5.79167	3.97446	5.51001	4.71779	5.60719	4.28019	4.39477	5.84162	4.52748	5.35249	4.63551	5.67703	4.43482	4.15945	4.962
LOC100240735	4.78251	1.94309	3.92657	3.47352	3.96802	2.81296	4.2321	1.91687	2.83619	3.44434	3.78158	3.31415	3.60551	2.98019	4.61117	3.85914	2.70643	3.87538	2.83132	3.04216	2.02528	2.09185	4.11194	3.28494	4.11834	4.37271	3.55091	3.48943	3.60908	3.54254	4.72322	2.00993	1.97841	3.78903	3.94271	3.4973	3.29573	2.9381	3.13143	2.8303	3.67499	4.83766	4.16341	3.30059	1.91913	3.12125	3.24311	4.61084	4.30254
SRMS	5.39993	3.28928	5.39929	1.97415	2.88928	4.77466	3.49514	3.40816	4.50808	4.79533	4.73438	4.16509	4.07535	3.72499	3.94133	4.96636	4.41717	4.18284	5.39102	3.50591	3.66739	2.09185	1.93492	4.22093	3.77894	4.86363	1.99235	5.07173	3.80745	4.33927	3.14209	5.45997	4.61935	3.04222	3.59417	3.4973	4.36524	5.36507	3.13143	1.95988	5.13188	4.65749	4.92949	3.77951	4.29564	4.56284	2.81055	4.67809	4.23001
ANO5	4.34041	3.28928	5.0075	4.21806	3.61849	4.60258	5.98381	4.59828	5.91282	2.74558	4.8914	4.0653	5.00201	4.28074	4.44962	5.33698	4.529	5.4032	5.06157	4.24687	3.66739	2.09185	5.46948	5.76582	3.6535	3.36863	5.44945	3.77023	5.29979	4.67334	5.37226	3.56604	4.78415	4.80316	4.84832	3.4973	2.84719	4.68341	3.13143	4.45506	4.88115	4.70021	3.07584	5.39186	5.70493	6.07291	5.12139	4.53151	4.94686
RAB3C	1.90756	1.94309	4.1916	1.97415	1.93233	1.9685	3.77562	3.88603	4.87859	1.93246	4.37535	4.38583	4.07535	4.63686	3	3.85914	3.59982	4.4288	4.50308	3.50591	2.02528	2.09185	1.93492	4.81392	3.30008	1.94704	4.02692	4.7891	3.80745	4.20142	4.9466	3.56604	1.97841	3.50842	4.31651	1.97323	3.29573	4.23828	3.60463	3.89549	3.67499	3.51752	4.01569	3.93078	4.89619	4.32348	3.52065	4.87331	4.36608
KCNJ4	3.618	1.94309	3.44953	1.97415	4.93687	3.51959	3.49514	4.65265	3.55175	5.39771	2.8573	3.59428	4.80074	3.92061	1.9036	3.58086	2.70643	2.80323	5.66642	3.04216	5.49042	4.05762	3.64332	5.12182	3.30008	4.94459	1.99235	3.02487	3.80745	3.74168	4.22638	3.56604	1.97841	3.50842	4.06248	3.03522	4.4214	4.64607	4.65385	1.95988	5.88602	1.929	4.01569	3.93078	1.91913	3.12125	4.38278	3.58965	2.84807
ODF3L2	4.59484	1.94309	2.98693	1.97415	4.34408	3.51959	3.77562	3.13336	2.83619	4.56877	3.78158	4.68564	4.25854	3.44411	3.46539	3.10641	3.87835	2.80323	3.54873	3.78684	2.02528	2.09185	4.65821	3.91532	3.30008	4.37271	3.83167	3.02487	3.60908	3.54254	5.01283	4.40142	1.97841	3.04222	3.79225	3.03522	5.15815	4.64607	3.40523	3.74254	3.39408	1.929	4.28053	1.90476	1.91913	4.56284	3.52065	3.93938	3.29543
SAA4	1.90756	3.28928	4.9723	1.97415	2.88928	4.48355	4.96116	4.59828	5.36392	4.88271	4.43191	4.77044	5.06679	4.9431	4.6935	3.85914	1.91133	4.59107	4.83253	4.60769	5.09368	4.89561	1.93492	4.98568	3.30008	4.54154	3.83167	4.22956	5.22708	5.30642	4.42858	4.40142	4.10254	5.38377	3.79225	5.38783	4.04609	5.38119	1.93243	4.74035	4.97897	4.61014	4.69048	5.1662	3.21438	5.58342	3.24311	5.44793	4.23001
FOLR3	4.66693	4.6365	4.89012	4.1	4.6004	5.34345	4.40684	4.07721	4.79468	5.6832	5.20699	5.2447	5.12155	2.98019	3.46539	5.09261	3.59982	4.62394	4.76474	5.16071	5.52601	5.58365	5.13605	4.22093	2.62465	5.68656	5.49705	1.93755	5.85479	4.72866	4.42858	5.22803	5.57033	4.13066	4.96812	3.4973	5.28214	5.6679	3.40523	5.44476	5.89579	3.79801	5.5586	2.85306	5.58027	5.22038	4.18462	5.59706	4.23001
SLC13A5	5.47084	3.76773	5.96591	4.52898	6.22936	5.61938	4.81626	6.31232	5.91802	4.97934	6.01315	4.81868	5.95538	5.4112	5.84215	5.73826	5.8784	5.86921	5.3868	4.49323	6.27058	5.22857	5.80757	5.8064	4.81313	5.92613	5.04536	3.77023	6.05667	1.91419	5.71129	3.56604	5.03939	1.93815	6.20822	5.04018	5.48251	4.83271	5.44857	3.54301	6.00492	3.05002	6.0702	4.7794	6.166	6.65098	5.60158	4.24356	5.74812
SLC27A6	4.91077	4.22772	4.36901	3.47352	2.88928	1.9685	4.32696	5.30051	3.27328	2.74558	5.10975	4.24944	3.32509	3.72499	4.44962	4.94408	4.91741	5.4724	5.45812	4.69913	2.02528	2.09185	4.11194	5.70959	5.3246	2.91775	1.99235	5.44366	5.03136	5.07081	4.22638	2.00993	3.98136	4.65233	5.59384	4.5486	4.92864	4.13991	5.51929	4.45506	4.14201	5.05495	3.81979	5.15769	4.29564	4.06497	3.99637	4.37947	5.78795
SYT3	5.47084	4.3657	2.98693	5.46266	5.55132	4.25981	4.71753	4.59828	3.75112	5.41461	4.37535	4.90062	4.82397	4.06802	5.32591	5.28297	4.37322	5.2301	4.12367	5.406	2.02528	2.09185	4.97983	5.13108	4.44216	4.54154	4.29036	4.47524	3.60908	4.01564	5.05107	3.10119	1.97841	4.42223	5.37131	3.77828	5.20498	3.6726	4.74616	3.74254	3.39408	5.91392	2.00463	4.3712	3.69169	4.41686	3.72024	3.78821	4.30254
VCX3A	5.19742	1.94309	5.31106	4.67623	3.81697	1.9685	4.96116	2.71364	1.95319	4.94088	3.30279	5.1184	4.33085	4.18488	5.74067	5.06091	4.64538	2.80323	4.68374	3.78684	5.63598	2.09185	4.25413	3.56486	4.11834	4.54154	4.46645	4.58941	4.58971	4.92911	4.72322	3.10119	1.97841	3.04222	5.18897	1.97323	4.4214	1.9462	4.2784	4.01819	5.01197	4.98236	4.87398	4.42747	4.63551	1.9512	4.87487	4.61084	1.90037
BAI3	4.459	4.04178	2.98693	1.97415	1.93233	3.71919	4.8708	4.50198	4.40984	3.44434	4.78575	3.79302	3.95492	4.06802	3.46539	4.53998	3.12583	5.20401	2.83132	3.50591	2.02528	2.09185	1.93492	4.51069	3.77894	3.36863	4.38593	4.47524	4.94253	3.26321	4.80091	4.40142	3.35091	3.50842	4.70458	3.4973	1.89203	3.39172	2.71501	4.20586	2.93985	3.51752	3.81979	4.42747	4.57086	3.12125	4.09827	4.05996	4.79772
HOXA13	3.9665	5.16552	2.98693	5.92896	5.37591	5.12677	4.75315	5.4312	4.68941	5.44578	4.15409	5.27154	4.54577	5.27063	5.02856	4.1925	5.67678	4.84167	3.74808	3.50591	4.39818	2.09185	5.56194	4.79175	5.4005	3.99806	3.08578	3.02487	2.87895	5.20923	4.9466	3.56604	4.72545	5.31622	5.54548	4.41758	5.52773	3.87038	5.75269	4.28019	3.39408	5.02047	5.75257	5.61865	3.69169	5.31179	3.99637	4.92734	5.36134
ELMOD1	3.81606	4.22772	4.64555	3.47352	4.63822	3.24255	5.45612	4.07721	5.00648	5.21265	2.8573	4.32213	4.45018	4.18488	3.94133	1.88175	3.12583	4.73495	3.26987	3.04216	2.02528	3.57965	5.11989	5.16582	3.88359	4.66543	4.95934	5.68347	5.09164	3.74168	3.89542	4.40142	3.35091	4.2468	3.59417	4.96208	4.79568	3.39172	4.07537	1.95988	4.02267	3.05002	3.07584	3.30059	4.98181	5.56904	3.24311	3.93938	4.04624
MYADML2	4.63238	3.28928	3.92657	3.95132	4.0884	4.09811	5.68971	4.42459	5.75909	4.36622	3.93313	3.79302	1.91747	4.54543	3.46539	4.04994	4.71604	4.51703	2.83132	3.78684	3.66739	2.09185	4.25413	5.53984	4.2826	2.91775	5.13077	1.93755	4.07861	3.54254	4.72322	2.00993	3.35091	3.04222	3.31352	1.97323	1.89203	4.13991	4.07537	1.95988	4.32329	3.79801	2.00463	4.05141	5.56054	6.01379	3.52065	1.91031	3.77426
EPHA7	5.24276	4.70003	4.75488	1.97415	4.34408	3.99593	3.77562	5.92412	4.55051	5.28539	6.00601	5.61635	4.1746	6.03781	5.67494	5.00724	5.7192	6.02561	5.96304	6.19302	2.02528	4.05762	5.69522	5.19727	6.03556	5.49609	6.02859	5.66047	5.61338	5.12039	5.92097	4.18931	4.65761	4.95853	5.98855	3.03522	4.59623	5.42502	5.90924	3.89549	4.7805	6.06647	5.61917	5.63948	5.42637	4.67375	5.85693	2.86145	4.81978
C15orf51	3.33731	1.94309	3.92657	1.97415	3.81697	3.51959	4.63587	4.27931	3.55175	3.79783	2.8573	3.79302	4.07535	4.36154	3	3.85914	4.41717	4.37771	2.83132	3.50591	4.39818	2.09185	4.25413	4.55237	4.7505	2.91775	3.55091	3.96569	3.95832	4.11626	4.22638	3.56604	1.97841	1.93815	4.99629	3.03522	3.77455	1.9462	4.21878	1.95988	1.94433	1.929	2.00463	3.58093	1.91913	3.12125	2.81055	4.43573	4.63268
EMX2	4.26854	3.76773	4.86648	3.95132	5.50597	4.09811	5.63677	3.76174	5.35916	5.9078	3.58274	3.94441	5.6257	4.18488	3	4.9204	3.59982	3.24469	3.90057	4.34285	4.13978	3.57965	5.3655	4.76828	4.63416	4.43571	5.15997	4.92334	4.5032	4.60987	4.22638	3.10119	4.78415	4.77019	5.5337	1.97323	4.92864	3.6726	3.40523	3.74254	4.24029	4.77463	3.81979	4.56482	4.6919	5.25381	4.79426	5.17362	4.84068
KCNH1	4.85182	6.03927	5.63893	5.97326	4.76336	4.52667	4.84447	6.12225	4.40984	4.25433	6.18484	5.85993	4.58704	5.11042	5.97	5.61041	5.9794	5.88994	5.65202	5.8905	2.02528	2.09185	6.00333	5.21905	6.03925	4.3007	4.1739	5.16492	5.52799	5.18726	5.24041	4.18931	5.92285	4.13066	5.6474	5.20645	4.8385	5.719	6.02378	3.26485	5.74665	4.34892	4.77355	6.18015	5.21597	4.92492	5.64183	5.26152	4.66505
AMH	5.66554	3.76773	4.07439	4.31511	4.51373	5.19541	3.49514	5.44241	1.95319	2.74558	4.31152	5.66291	3.95492	4.92327	5.18051	4.04994	5.27085	4.59107	2.83132	5.14792	2.02528	4.325	1.93492	4.22093	5.84362	4.11812	4.38593	4.22956	3.80745	4.87888	3.14209	2.00993	4.75582	5.27603	5.58005	4.41758	4.69343	4.02043	5.62823	4.34536	4.51261	3.79801	4.73398	4.98149	4.40564	4.06497	3.52065	4.15945	1.90037
KIAA0319	4.9923	6.02519	4.81454	5.36234	4.40736	4.43625	4.32696	5.28698	4.02626	3.44434	4.60814	5.1184	4.74987	5.95378	4.76242	5.49221	5.56051	5.36121	5.14274	5.659	4.6964	3.57965	5.95668	4.59055	4.79837	4.58669	1.99235	4.47524	4.66224	4.92911	5.8875	5.65931	5.25791	4.5514	5.39989	4.73439	5.33447	6.03601	5.79179	3.74254	5.72204	4.77463	5.27536	6.16308	4.29564	4.83533	5.91406	3.58965	4.79772
CASQ2	4.87248	5.08707	5.7515	4.67623	5.60776	5.36263	6.45193	4.8196	6.5029	5.08455	4.64329	4.81868	5.61999	4.28074	4.3805	5.00724	4.93032	5.60821	4.68374	4.49323	5.13311	4.05762	4.45767	6.35905	4.82737	3.64917	6.1469	5.56373	5.09164	5.29578	5.17198	3.8469	3.63064	4.65233	4.67486	5.0574	5.23282	3.87038	4.15171	5.23554	3.39408	4.73904	3.53889	5.22035	6.39445	6.42736	5.81147	5.11905	5.1613
BFSP2	3.9665	1.94309	3.92657	1.97415	4.34408	2.81296	3.49514	3.13336	1.95319	2.74558	3.58274	1.92734	3.95492	4.49176	4.08826	4.73563	1.91133	3.52413	4.0227	4.24687	3.66739	2.09185	4.11194	3.91532	3.97281	3.84738	3.55091	4.22956	2.87895	4.60987	5.11687	2.00993	3.63064	3.98401	4.31651	4.23987	3.57604	4.13991	3.88357	3.74254	1.94433	3.99251	3.53889	3.77951	4.15578	3.59256	4.18462	5.21316	4.93113
CDHR2	3.618	4.47396	4.89012	3.47352	4.2717	3.24255	4.11644	3.13336	4.28736	4.96696	2.8573	3.31415	3.80398	4.36154	3.46539	4.04994	2.70643	2.80323	3.54873	4.24687	4.79493	2.09185	3.16844	1.90676	3.6535	4.73217	4.1739	3.48943	3.80745	4.33927	1.88593	4.61172	3.98136	3.98401	3.31352	3.4973	4.6311	4.32138	3.60463	1.95988	5.01197	3.05002	3.81979	4.63772	3.69169	4.67375	2.81055	4.37947	3.77426
SLC25A41	3.618	1.94309	1.91915	4.52898	4.51373	5.20312	3.49514	4.27931	1.95319	3.92182	2.8573	4.68564	2.87605	4.18488	5.25342	1.88175	4.73719	2.80323	4.61986	4.34285	4.6964	2.09185	1.93492	3.28494	2.62465	2.91775	1.99235	4.53581	4.39702	4.39636	4.50496	5.56682	5.1992	3.98401	4.82767	1.97323	4.14547	4.9222	1.93243	1.95988	4.02267	4.73904	4.16341	3.30059	4.40564	4.06497	4.18462	3.30932	2.84807
FLJ33360	4.59484	1.94309	2.98693	1.97415	3.81697	4.60258	3.97022	3.88603	4.6253	4.11223	5.22199	3.31415	3.80398	3.72499	4.2046	4.47376	4.37322	2.80323	3.26987	1.96301	4.39818	4.63693	1.93492	3.76371	5.6519	4.43571	3.08578	4.11291	1.91666	4.87888	5.08552	3.56604	4.36036	3.78903	4.24464	3.77828	4.55837	4.32138	1.93243	4.68418	4.24029	4.13858	2.00463	2.85306	4.15578	4.06497	4.09827	4.24356	3.77426
INSM1	5.64386	3.28928	3.92657	3.47352	1.93233	1.9685	4.47548	4.07721	2.83619	1.93246	4.23867	1.92734	3.80398	4.06802	4.30003	4.94408	4.06954	4.51703	4.50308	3.04216	2.02528	2.09185	4.83293	3.91532	3.02964	4.3007	3.08578	3.48943	4.33387	3.74168	4.42858	3.10119	5.12822	5.30073	5.24548	3.4973	3.77455	5.21143	3.13143	3.89549	3.67499	4.34892	4.84313	3.93078	4.40564	1.9512	4.72151	5.15639	4.66505
GBX2	5.64213	4.56236	5.53507	5.26233	5.02957	5.02924	4.32696	3.60751	4.21328	5.16558	4.80924	4.998	4.95678	4.06802	3	1.88175	4.8609	4.09764	4.0227	3.04216	2.02528	2.09185	4.36611	4.59055	3.97281	5.46338	4.29036	4.96633	4.17783	5.08129	4.33768	4.71307	4.61935	1.93815	4.06248	4.41758	4.4214	5.65037	4.78575	5.63135	5.57126	1.929	5.24393	5.05824	3.21438	1.9512	4.79426	5.01653	5.37869
CUX2	2.88546	3.28928	4.49978	3.01399	1.93233	3.99593	4.53545	3.76174	1.95319	4.49772	4.56999	3.79302	3.95492	4.63686	3.74614	4.69445	4.529	4.4288	3.90057	1.96301	4.57012	4.05762	4.53461	4.68858	3.77894	2.91775	3.83167	3.77023	4.33387	4.27495	3.89542	2.00993	2.90638	3.98401	4.75841	1.97323	4.81768	4.68341	3.98721	4.78997	1.94433	4.83766	2.00463	4.3712	3.96772	3.59256	4.4819	5.14745	4.962
DNAH11	5.70853	3.77456	5.22792	5.71151	4.80161	5.59853	4.48374	5.84264	4.03828	5.77721	4.44297	4.07933	5.27966	5.52603	4.92838	5.03918	3.88842	4.38676	5.88567	4.35241	2.02528	2.09185	4.12154	4.04616	5.35256	6.16627	4.60503	4.59546	5.29519	5.68574	4.25542	5.32723	5.39092	4.43466	5.04554	5.45693	5.67418	5.74602	4.81398	4.03026	5.8656	5.25715	5.64989	5.70536	4.50597	5.13389	4.44465	4.07078	5.36464
BPI	3.9665	4.04178	3.92657	3.01399	4.40736	1.9685	4.53545	3.13336	3.90389	3.64387	2.8573	5.01202	4.39411	3.72499	4.3805	4.04994	4.32503	3.99712	3.26987	1.96301	2.02528	2.09185	5.28618	4.79175	3.88359	1.94704	3.55091	1.93755	2.87895	4.33927	4.08505	3.10119	4.20263	3.04222	4.16123	3.77828	4.14547	2.9381	3.75895	3.74254	1.94433	4.61014	2.00463	4.05141	3.21438	3.87218	4.09827	2.86145	4.30254
INSRR	4.34041	4.70003	4.07439	1.97415	2.88928	3.71919	4.63587	4.3807	1.95319	4.56877	3.93313	4.24944	4.45018	1.89913	3.94133	4.77301	1.91133	4.18284	3.54873	3.04216	2.02528	2.09185	4.11194	3.76371	4.90335	3.99806	3.08578	3.96569	1.91666	4.72866	4.22638	2.00993	2.90638	4.73441	3.94271	3.03522	3.77455	3.39172	3.40523	1.95988	2.93985	3.99251	3.07584	3.30059	3.21438	1.9512	3.72024	4.67809	4.87944
PTPRQ	4.26854	5.01416	2.98693	4.1	2.88928	6.03715	4.81626	5.95468	4.55051	3.44434	5.40576	1.92734	4.07535	4.90233	5.66748	4.47376	5.15167	4.18284	5.48056	4.55397	2.02528	5.52248	4.60063	2.83973	5.24115	5.25561	4.1739	3.96569	4.39702	4.60987	4.57048	2.00993	3.98136	5.72037	5.0695	5.24785	4.22945	5.95171	4.15171	3.26485	2.93985	4.80738	2.00463	4.3712	4.92694	4.83533	3.72024	3.93938	4.74965
ADAMTS16	5.30643	5.88841	2.98693	4.67623	5.51801	4.32554	5.80367	5.25809	5.39526	4.73225	4.56999	5.30799	5.92321	4.88017	4.50999	4.86794	4.67023	5.17565	4.71246	3.04216	4.13978	3.57965	5.67554	5.58778	4.82737	4.37271	5.00478	5.75746	3.95832	5.07081	5.11687	4.83152	3.63064	5.53265	5.13903	4.80422	4.79568	3.39172	3.60463	4.01819	2.93985	4.25416	3.07584	4.84571	5.25287	4.97491	5.34652	5.01653	4.1458
C22orf15	2.88546	1.94309	2.98693	3.75463	3.3381	2.81296	3.02787	4.3807	3.75112	2.74558	1.92328	2.8677	3.95492	5.09809	3.74614	3.10641	4.2718	3.72323	2.83132	4.24687	3.66739	2.09185	3.92144	4.13635	4.82737	1.94704	3.55091	3.48943	4.66224	5.07081	4.22638	3.10119	4.10254	3.98401	3.79225	3.4973	4.22945	3.6726	3.60463	1.95988	2.93985	3.51752	3.53889	4.84571	1.91913	3.12125	4.18462	4.73622	4.66505
CRYBB3	4.75648	1.94309	5.42839	4.67623	4.2717	4.43625	3.97022	4.21998	3.75112	3.64387	4.23867	1.92734	3.80398	4.80498	4.08826	4.47376	4.61898	4.18284	3.26987	3.78684	5.3863	4.82494	3.16844	2.83973	5.04488	4.43571	1.99235	3.48943	3.80745	4.87888	5.49102	2.00993	5.28023	3.04222	4.37931	4.8909	4.22945	5.26871	4.50226	3.26485	4.56215	3.05002	4.69048	4.3712	3.96772	4.06497	3.52065	3.30932	4.1458
WDR63	3.33731	4.56236	2.98693	4.71628	4.88033	3.24255	4.96116	4.67748	3.55175	3.64387	4.60814	3.59428	4.80074	5.14493	3.94133	4.53998	4.21245	4.25629	4.45659	3.50591	4.13978	2.09185	4.97983	2.83973	4.5616	2.91775	4.1739	5.10098	5.20404	5.13838	3.89542	3.10119	3.98136	4.34202	4.16123	3.03522	4.66341	3.39172	3.98721	5.05381	1.94433	4.25416	3.07584	5.26675	4.15578	3.12125	3.24311	4.94375	5.02948
RNASE10	4.59484	4.75542	6.06186	5.05865	5.15495	3.99593	5.36364	5.96228	5.82976	5.33617	5.8251	4.0653	5.65243	5.73616	3.94133	5.28297	5.59668	4.89415	5.61116	3.50591	6.1401	2.09185	4.75462	5.8913	3.77894	5.63403	3.08578	5.73732	3.32862	5.74247	5.55724	3.56604	3.82961	1.93815	5.74315	3.4973	5.81163	4.32138	5.38038	4.50189	5.15376	5.72261	5.5249	5.19822	3.69169	6.08529	4.60029	3.58965	4.30254
C14orf162	4.34041	5.16552	3.92657	4.39697	3.96802	3.51959	3.77562	4.74441	5.11189	3.64387	4.31152	4.16509	3.80398	5.20483	5.42887	5.09261	4.96659	5.4032	4.0227	5.39401	4.13978	2.09185	5.41552	3.56486	5.22328	3.36863	4.1739	4.71991	3.95832	4.49371	5.87479	3.10119	4.20263	3.04222	5.23227	4.23987	4.14547	2.9381	5.8772	1.95988	5.45949	3.79801	4.16341	5.72252	3.21438	4.67375	4.38278	1.91031	3.57564
ROPN1	4.08637	4.04178	5.02389	1.97415	4.9861	2.81296	3.02787	4.15321	3.27328	2.74558	3.93313	3.59428	3.32509	3.44411	4.30003	4.1925	2.70643	4.65449	3.26987	3.78684	5.09368	2.09185	3.16844	3.56486	4.98556	3.64917	1.99235	3.02487	4.80309	3.54254	3.89542	3.10119	3.63064	3.04222	3.79225	1.97323	4.14547	4.02043	3.60463	4.20586	2.93985	3.99251	2.00463	3.58093	3.21438	4.86748	1.95233	3.30932	3.92554
ZNF257	3.618	4.6365	4.64555	3.47352	3.61849	5.42549	4.8708	3.98932	4.02626	2.74558	4.05421	4.16509	4.92326	5.40171	5.4976	4.47376	3.59982	4.80231	3.74808	3.50591	2.02528	2.09185	4.70912	4.76828	4.61128	3.36863	3.83167	3.48943	5.328	4.60987	4.22638	5.31286	3.35091	4.42223	5.88826	3.03522	3.57604	3.6726	3.75895	5.41836	5.54869	4.49728	3.81979	4.56482	3.21438	3.12125	4.38278	5.25503	5.10663
HSD17B3	5.65742	3.76773	4.07439	3.75463	5.25368	5.48987	4.94051	5.04648	4.21328	5.93583	4.05421	5.70233	5.19423	4.49176	4.89622	4.1925	4.87584	4.55557	5.76973	3.98257	2.02528	5.54429	3.64332	3.91532	5.16282	5.86166	3.83167	4.11291	5.19598	5.50261	5.35151	4.04224	3.98136	5.3714	4.31651	5.18365	5.48822	5.74945	3.60463	4.28019	2.93985	3.05002	3.53889	4.15098	4.57086	4.83533	6.02141	5.15639	3.57564
TEKT3	3.33731	3.28928	3.44953	3.75463	1.93233	1.9685	3.77562	4.15321	1.95319	5.19985	2.8573	4.88169	4.54577	4.43104	3.94133	3.58086	3.75402	1.89419	1.9385	1.96301	2.02528	2.09185	3.92144	4.13635	4.86723	3.36863	3.55091	3.77023	4.77849	4.20142	4.67812	3.10119	1.97841	3.78903	4.31651	4.48753	5.05049	1.9462	4.07537	2.8303	3.39408	4.13858	3.07584	4.3077	1.91913	4.06497	3.72024	3.58965	4.23001
MRGPRX3	4.40331	3.28928	5.75692	5.23411	5.34025	3.51959	5.19042	4.33252	4.77074	5.37978	4.67585	3.31415	5.56469	3.44411	4.50999	5.12161	5.01005	5.21074	5.42275	5.54782	2.02528	5.22857	1.93492	6.36676	4.5871	5.59129	1.99235	4.84832	5.14307	3.26321	5.05107	5.20304	4.83563	3.50842	3.94271	1.97323	4.4214	5.86369	5.1417	5.83601	5.80412	3.99251	6.06921	4.52342	3.21438	5.58342	3.24311	4.48606	2.84807
C10orf93	5.08254	4.3657	3.44953	3.01399	4.0884	3.24255	3.49514	3.40816	2.83619	3.79783	4.15409	3.79302	4.07535	3.72499	1.9036	4.04994	2.70643	4.9403	4.0227	3.04216	3.66739	2.09185	1.93492	4.35767	3.49879	3.64917	4.1739	3.02487	3.95832	4.27495	4.33768	3.10119	2.90638	1.93815	3.59417	3.77828	5.00129	4.56054	3.88357	2.8303	1.94433	4.34892	3.81979	4.3712	4.40564	3.12125	2.81055	3.30932	4.04624
HHIPL2	4.69896	1.94309	3.92657	5.36885	4.51373	3.51959	4.71753	3.60751	4.50808	5.36074	4.15409	2.8677	4.45018	5.38174	4.08826	5.12161	3.12583	3.24469	2.83132	5.406	2.02528	4.74055	3.64332	5.1401	4.5871	4.49158	4.29036	3.02487	5.14307	4.01564	4.57048	3.10119	4.72545	1.93815	4.70458	4.12249	4.7724	1.9462	3.13143	3.89549	4.32329	3.51752	3.81979	4.3712	4.49546	4.76226	3.87339	4.64575	4.55974
MAPK4	5.32324	4.88746	4.72147	4.67623	4.0884	3.51959	5.46901	4.3807	4.99265	5.65857	4.52834	5.27154	3.60551	3.44411	4.61117	5.2994	5.20814	5.47792	3.74808	3.78684	4.79493	2.09185	5.3655	5.16582	3.30008	3.84738	4.1739	3.02487	4.45306	4.20142	5.14556	2.00993	4.42429	4.80316	5.62287	3.77828	4.55837	4.45549	5.39399	3.89549	4.45722	5.76574	3.07584	5.18259	5.10946	4.49539	4.4819	3.58965	4.1458
PTH2R	5.98704	5.77545	5.54746	3.75463	4.2717	5.97829	5.28101	6.00684	5.78467	5.38709	6.07898	6.04826	5.54762	4.28074	5.41481	5.71502	5.98659	5.14463	5.87266	3.04216	2.02528	2.09185	3.92144	5.74529	5.94248	6.00532	1.99235	3.48943	4.2616	5.47732	4.76395	6.06003	2.90638	5.83918	4.06248	1.97323	3.29573	5.85331	5.94275	2.8303	6.10456	5.61297	5.70835	3.77951	3.21438	1.9512	6.00808	5.44793	3.77426
TDRD5	5.37802	5.41185	4.07439	5.19234	6.30932	4.8195	1.91018	5.79758	4.28736	4.11223	6.04648	5.65626	6.09712	5.13381	5.1484	5.40601	5.98804	5.3886	5.76661	5.69475	6.17284	5.94107	5.26547	4.29385	3.49879	4.49158	1.99235	3.48943	3.80745	1.91419	5.8459	6.11807	6.00136	5.7441	6.04615	3.77828	5.63025	6.08131	3.98721	3.74254	5.72953	6.18292	6.04676	4.15098	4.89619	3.87218	6.06428	5.55811	5.55317
PPP1R1B	5.97894	3.76773	6.09797	4.31511	1.93233	5.36723	3.49514	6.12132	4.21328	4.77536	5.8874	5.08636	4.25854	5.27063	5.979	5.0439	5.89382	6.07032	6.38177	6.0879	5.20097	3.57965	3.64332	5.53014	5.93415	5.22383	3.08578	5.07173	6.07982	4.98715	5.22996	5.06137	5.54447	5.08399	5.92099	3.97446	5.2192	5.95171	6.09691	5.88479	6.15937	6.14526	6.45659	6.21516	5.69534	4.76226	1.95233	3.93938	5.22943
CHRDL1	3.81606	4.47396	5.37265	4.8741	5.14524	3.24255	5.99859	5.1972	5.8186	4.53459	5.70197	5.15699	5.32642	5.11042	5.26932	5.82685	5.57756	5.86978	4.94113	4.60769	2.02528	2.09185	4.83293	5.4157	5.6844	4.21709	5.14567	5.91473	4.88876	5.29578	5.97602	4.30583	1.97841	5.4014	6.10307	4.8909	4.55837	2.9381	4.82183	4.5837	4.56215	6.10421	2.00463	5.82282	5.53927	5.6819	5.4794	5.79501	5.94591
HCG22	4.50883	3.28928	4.36901	1.97415	3.3381	5.00352	4.47548	3.40816	3.55175	4.60054	5.23635	4.53847	4.07535	2.98019	4.30003	4.59777	3.87835	4.85995	3.54873	3.78684	4.79493	2.09185	1.93492	2.83973	3.49879	3.64917	3.55091	5.1982	1.91666	2.822	3.89542	3.56604	3.82961	3.50842	3.79225	3.03522	4.36524	4.39294	5.60719	2.8303	4.7805	3.05002	3.81979	3.30059	3.21438	3.59256	3.87339	4.92734	4.69518
SYN2	5.76552	4.56236	4.1916	6.00247	6.04209	4.63634	3.02787	5.85651	4.68941	5.87239	4.43191	4.44225	5.21786	5.73202	5.98047	5.66498	5.78687	5.5456	4.65295	5.27654	4.39818	2.09185	5.5697	5.23278	4.63416	4.88548	1.99235	4.53581	4.82631	3.89392	5.27904	2.00993	5.10498	4.34202	6.09146	4.69469	5.20498	4.45549	6.00191	4.28019	4.45722	5.84162	4.45775	5.19822	4.57086	4.32348	4.25929	3.78821	4.23001
ASXL3	5.79077	4.75542	2.98693	3.47352	4.40736	2.81296	5.17978	4.50198	3.55175	5.55893	4.52834	4.61807	4.58704	4.49176	3	4.3966	4.77657	4.55557	4.28311	1.96301	4.13978	2.09185	5.00345	4.68858	4.61128	1.94704	3.55091	4.87496	4.66224	3.74168	4.33768	2.00993	4.28729	3.98401	4.67486	3.03522	3.77455	2.9381	3.88357	4.28019	3.67499	4.77463	3.07584	4.91961	4.15578	3.59256	3.87339	4.37947	4.30254
HIST2H3D	4.18513	3.28928	3.92657	4.21806	3.61849	4.52667	4.63587	4.07721	3.55175	2.74558	2.8573	1.92734	1.91747	4.59347	3.46539	4.1925	3.12583	2.80323	2.83132	3.04216	3.66739	4.325	1.93492	1.90676	3.02964	1.94704	3.55091	1.93755	3.32862	3.54254	3.89542	2.00993	2.90638	3.98401	2.86137	3.4973	3.57604	3.87038	3.13143	3.26485	1.94433	4.13858	4.16341	4.3077	3.21438	3.87218	4.09827	4.15945	3.77426
TNFSF18	1.90756	5.76255	4.1916	4.52898	4.34408	4.93034	4.71753	5.43405	4.65855	3.79783	6.04041	5.23762	5.12155	5.18604	5.54976	5.0771	4.32503	5.26564	4.65295	5.84979	2.02528	2.09185	5.59867	4.13635	5.16282	3.36863	3.08578	6.10085	3.95832	5.82797	5.34426	5.38766	4.57758	4.73441	4.31651	5.43965	4.91223	5.44683	4.87057	4.11976	4.39477	5.45857	5.64365	5.5055	3.69169	4.92492	5.98033	1.91031	3.92554
TDH	5.21327	4.22772	4.07439	4.21806	3.81697	3.71919	4.2321	5.50841	2.83619	4.45773	3.78158	4.61807	3.95492	5.1223	4.50999	3.85914	5.21385	3.72323	4.73941	4.80795	5.16865	4.89561	4.53461	3.28494	5.3004	3.99806	3.08578	1.93755	3.80745	1.91419	5.01283	2.00993	5.20824	3.98401	5.12994	4.23987	4.91223	4.32138	4.53684	4.01819	4.80811	4.80738	5.37749	4.70023	3.21438	3.59256	5.30036	1.91031	4.87944
HOXB8	3.618	5.36836	4.28787	5.89642	5.02957	3.87261	3.49514	5.16531	4.35226	5.48186	4.37535	5.50946	4.1746	3.92061	5.49034	5.40601	5.26606	5.30255	4.83253	4.77472	5.20097	2.09185	5.40206	4.76828	5.13393	4.21709	4.69736	4.53581	4.07861	3.89392	4.33768	2.00993	5.95378	5.18799	5.30963	3.77828	5.20498	4.80685	5.35496	4.61971	4.32329	3.51752	5.35484	4.90241	3.21438	4.67375	5.14859	3.30932	5.23619
CLDN9	5.37343	4.56236	4.9334	3.01399	5.30603	4.69703	4.84447	4.53638	2.83619	6.15525	4.52834	5.42949	4.45018	3.92061	4.6935	4.30479	4.06954	4.47496	5.59534	3.04216	5.09368	2.09185	1.93492	4.94179	4.2826	4.3007	4.64953	3.77023	5.35383	4.53581	4.08505	4.92377	3.98136	5.20969	3.94271	4.12249	4.87713	3.39172	4.07537	1.95988	3.87268	3.79801	3.07584	4.3077	4.57086	4.06497	1.95233	3.30932	5.48367
ABCG5	4.63238	1.94309	5.02389	4.39697	3.81697	2.81296	3.49514	3.60751	3.90389	3.1688	1.92328	4.16509	3.60551	1.89913	5.30588	4.1925	4.21245	4.18284	4.45659	3.50591	2.02528	2.09185	3.92144	2.83973	4.11834	4.66543	1.99235	3.48943	2.87895	3.74168	3.14209	3.10119	3.82961	3.50842	4.48486	1.97323	4.51706	5.65635	1.93243	2.8303	4.32329	3.51752	4.16341	3.77951	1.91913	4.06497	3.52065	3.58965	1.90037
IRX6	3.618	5.88051	3.44953	6.16468	6.02554	4.85995	5.48534	4.93736	5.15924	4.8144	4.73438	5.98772	5.36682	6.03065	6.07517	5.51209	4.41717	5.63996	4.54537	5.97832	4.87504	5.34484	5.74258	4.74337	6.23877	2.91775	3.08578	5.03987	5.26879	4.39636	5.48208	3.8469	5.71558	6.13882	5.7421	3.77828	5.08334	4.83271	5.94927	3.26485	4.32329	5.7278	2.00463	5.4078	5.1269	5.87815	5.82654	5.29781	5.37869
ZBTB16	5.51369	5.12851	4.75488	1.97415	4.34408	1.9685	5.46476	4.50198	5.63363	5.36849	4.76086	4.38583	3.80398	5.45044	1.9036	5.00724	4.93032	4.65449	3.54873	4.96481	4.79493	2.09185	4.11194	5.18967	3.02964	4.11812	5.62792	5.128	4.17783	5.44957	4.97006	5.06137	4.75582	4.2468	4.52986	1.97323	3.92561	4.23828	1.93243	3.74254	5.01197	5.76426	3.07584	5.84526	4.98181	5.56532	3.24311	4.37947	4.5977
SPIN2A	3.81606	4.04178	4.28787	3.47352	1.93233	4.32554	4.47548	4.78374	2.83619	3.1688	4.05421	2.8677	3.60551	3.92061	4.3805	3.85914	4.37322	4.47496	4.85284	4.65575	2.02528	2.09185	4.36611	3.76371	4.53449	4.3007	3.83167	3.96569	3.60908	3.54254	4.08505	3.10119	1.97841	4.13066	4.80589	4.12249	2.84719	4.45549	2.71501	1.95988	2.93985	3.79801	2.00463	3.93078	3.21438	3.12125	3.52065	3.58965	4.04624
USP44	4.08637	4.88746	3.92657	3.01399	4.18777	3.71919	3.77562	5.48096	4.40984	3.44434	4.05421	2.8677	3.60551	5.01329	5.05896	4.59777	5.18422	5.11931	4.40516	4.94263	3.66739	2.09185	5.15146	4.46493	5.179	1.94704	1.99235	4.8198	4.33387	4.4475	4.99207	3.8469	4.28729	4.42223	5.52884	4.80422	4.30188	2.9381	5.0863	3.54301	2.93985	4.55717	3.81979	5.12127	3.69169	5.03934	3.87339	5.00309	5.05333
PI16	3.81606	5.9232	4.4388	4.1	4.78959	3.51959	5.53268	4.27931	5.41184	4.36622	4.94333	5.59809	5.24694	4.88017	4.65429	5.39461	5.28021	5.12795	4.81114	4.12998	2.02528	2.09185	4.25413	5.64005	4.5871	3.84738	4.1739	5.7357	4.45306	5.39246	5.78676	3.10119	3.63064	5.15258	5.10103	4.5486	5.07272	4.60531	4.07537	5.5914	4.14201	5.69882	4.16341	5.09119	5.63812	5.71365	5.51121	5.52603	5.50617
FREM2	5.97561	5.63216	6.07272	5.02468	2.88928	3.51959	5.8287	6.63273	5.99098	4.65807	5.92481	6.07431	4.69189	5.89264	4.87287	4.94408	6.3363	5.65728	5.38253	5.00562	5.84503	3.57965	6.2526	5.69557	4.87964	6.02199	5.33206	5.28175	5.77668	4.4475	6.27992	2.00993	4.72545	4.80316	5.81141	5.19524	4.55837	3.87038	6.43139	4.40322	5.23782	4.98236	5.27536	6.52514	5.85182	6.36451	5.66457	3.93938	3.92554
LOC441666	5.34431	4.3657	5.63461	1.97415	1.93233	3.87261	4.94051	3.98932	4.46142	4.25433	4.37535	4.44225	5.02933	4.18488	5.55563	5.30729	5.4719	4.59107	4.28311	3.50591	2.02528	5.22857	5.20703	5.29933	4.63416	4.99576	4.53565	4.22956	5.14307	5.3804	4.67812	5.65344	3.35091	5.56023	5.7279	4.83523	5.10363	4.97795	3.75895	1.95988	5.50417	4.61014	5.50645	4.60275	3.21438	1.9512	3.72024	4.76255	4.42237
NALCN	4.87248	5.61302	1.91915	5.14478	4.67309	2.81296	5.42354	5.59544	4.55051	5.36074	4.67585	5.05111	5.22539	4.77636	4.72938	4.47376	5.25126	4.75868	2.83132	3.78684	2.02528	2.09185	5.32396	5.46341	5.41064	3.64917	3.83167	4.89991	3.60908	4.98715	5.03245	4.04224	4.10254	4.65233	4.84832	4.12249	4.36524	3.39172	5.56858	5.38504	3.39408	5.33186	3.07584	4.7283	4.89619	4.20942	4.32473	4.67809	5.0416
IL17REL	3.33731	4.6365	1.91915	3.01399	3.81697	4.09811	3.49514	3.76174	3.27328	4.68423	4.43191	3.31415	4.07535	5.56563	3.46539	5.12161	3.40036	4.32061	4.0227	3.50591	4.39818	2.09185	4.11194	2.83973	4.5871	2.91775	1.99235	4.75595	5.03136	5.32173	4.33768	3.56604	2.90638	5.98722	4.60833	3.77828	4.74774	4.32138	3.60463	4.11976	2.93985	5.36573	2.00463	4.63772	3.69169	3.59256	3.99637	5.0658	5.69653
BTBD16	4.92854	4.6365	5.21641	4.21806	4.83753	5.8197	3.49514	4.07721	3.55175	4.49772	6.07356	4.79528	4.1746	4.36154	5.97101	5.5825	5.13051	4.37771	5.90024	3.98257	3.66739	2.09185	3.92144	3.56486	3.97281	5.97109	4.02692	3.48943	4.45306	5.62584	4.50496	6.05837	4.20263	1.93815	4.64285	4.80422	4.47164	5.98901	3.88357	3.74254	6.09611	3.05002	5.49676	4.3077	3.69169	4.56284	4.85618	3.30932	3.57564
LGALS4	4.7287	1.94309	3.92657	1.97415	4.78959	4.43625	3.02787	4.07721	4.21328	3.79783	5.34271	4.44225	1.91747	4.83164	5.99043	4.1925	2.70643	3.24469	5.6261	1.96301	2.02528	3.57965	3.92144	2.83973	5.48851	6.26757	4.53565	4.98613	4.6944	5.5233	4.83479	5.61179	3.82961	5.05231	4.06248	3.97446	1.89203	5.04138	3.60463	3.74254	6.05339	4.13858	5.83019	4.05141	3.69169	3.12125	3.52065	4.31603	4.77438
SLC5A5	4.26854	3.76773	5.54746	3.75463	5.27434	5.37626	3.97022	5.34174	4.02626	5.30483	5.12961	4.58003	5.56704	5.15568	5.1484	5.02602	4.06954	5.81154	5.61308	5.09146	3.66739	2.09185	4.11194	1.90676	4.44216	4.54154	3.55091	4.53581	4.2616	5.06	5.08552	4.18931	5.1168	4.6953	5.71873	4.83523	5.41421	5.9735	4.21878	4.50189	5.33048	4.34892	5.02144	5.19822	4.86283	5.43428	3.99637	4.87331	4.79772
LAMB4	3.81606	3.76773	4.07439	3.75463	3.3381	1.9685	5.17978	4.62629	4.7453	4.36622	2.8573	5.5598	3.80398	3.92061	3.46539	4.1925	3.98165	3.87538	5.14274	4.24687	2.02528	2.09185	3.64332	4.35767	4.50573	4.99576	3.08578	5.82793	5.61534	2.822	3.89542	4.95036	5.52578	5.3714	3.31352	3.4973	4.47164	2.9381	4.33188	5.10884	4.14201	1.929	4.73398	3.93078	3.96772	1.9512	3.72024	5.63276	4.79772
SNORD116-20	4.26854	3.76773	1.91915	3.75463	1.93233	3.71919	4.58843	4.07721	4.55051	1.93246	4.37535	4.16509	3.32509	4.28074	3	4.30479	4.14564	4.09764	4.28311	4.34285	2.02528	2.09185	3.92144	5.09237	4.63416	3.36863	3.83167	3.96569	4.58971	4.70191	3.14209	2.00993	4.36036	4.13066	5.14791	1.97323	4.74774	3.39172	4.33188	2.8303	1.94433	4.13858	2.00463	4.47784	4.57086	4.32348	1.95233	4.24356	4.66505
RHBG	4.459	4.84805	5.22545	3.75463	4.34408	5.44737	3.49514	4.50198	2.83619	5.00296	4.73438	3.31415	4.58704	4.49176	5.24516	5.0771	4.71604	5.09196	4.87215	5.53677	5.81245	2.09185	3.92144	4.81392	4.05025	4.54154	3.08578	4.94546	5.28156	5.20923	4.83479	3.10119	5.20824	3.50842	4.75841	3.4973	4.74774	5.76785	5.05957	3.54301	5.39191	3.79801	4.37669	4.15098	4.15578	4.62168	4.89272	4.37947	4.55974
ABCC6P2	4.59484	3.76773	4.602	3.01399	3.81697	2.81296	3.49514	4.07721	1.95319	4.79533	3.93313	5.23762	3.32509	4.06802	4.93905	3.58086	3.40036	4.85995	4.68374	3.78684	2.02528	2.09185	3.92144	4.22093	3.6535	3.84738	3.08578	4.11291	4.45306	3.26321	3.61807	3.10119	3.82961	3.04222	4.43501	4.69469	3.92561	4.02043	4.53684	3.54301	3.39408	4.91676	3.53889	4.60275	1.91913	4.67375	4.25929	3.58965	4.04624
PCDHA4	4.46632	4.81572	5.3112	3.88733	4.03492	3.51959	4.19995	4.5129	4.39213	3.32445	5.85555	4.09399	5.18122	4.85228	5.39822	5.12889	3.59982	6.08325	3.90057	1.96301	2.02528	2.09185	4.72189	1.90676	4.06732	3.62322	4.34505	3.77023	5.01079	4.74517	4.40828	4.18931	1.97841	4.12154	6.06199	1.97323	3.29911	4.05523	5.05613	3.56802	5.09934	4.63348	2.00463	4.90068	4.819	1.9512	4.03094	4.81666	4.1458
DES	5.25656	5.24348	6.25739	5.47655	6.25713	6.01806	6.78884	5.22068	6.91553	5.06583	5.12961	5.20767	6.12144	5.11042	4.82145	5.55781	4.91741	6.13781	5.43382	5.00562	5.99915	2.09185	5.21958	6.79449	5.33759	5.13895	6.71039	5.67326	4.95888	5.87809	5.65182	5.52304	3.82961	5.09881	4.99629	3.77828	5.09363	4.88	4.53684	4.54455	5.77526	4.86582	5.72825	5.94929	6.76743	7.01499	6.44027	5.84628	5.55317
SFTA1P	4.40331	3.76773	4.602	3.01399	3.81697	3.24255	4.47548	3.40816	3.90389	3.79783	3.78158	4.68564	5.07845	3.44411	3	3.58086	3.59982	3.24469	2.83132	3.50591	2.02528	2.09185	3.64332	4.03637	4.61128	5.37936	4.53565	4.47524	4.92543	3.54254	4.22638	4.18931	2.90638	4.49121	1.88259	3.77828	4.04609	3.87038	3.75895	5.55211	1.94433	3.05002	4.28053	3.30059	5.00646	3.87218	4.25929	4.61084	4.36608
GGT8P	4.18513	1.94309	3.44953	3.01399	3.61849	4.52667	4.67864	1.91687	4.46142	2.74558	4.23867	3.94441	2.87605	2.98019	3.46539	4.04994	3.75402	3.87538	4.40516	1.96301	4.57012	2.09185	4.60063	1.90676	5.36497	3.36863	1.99235	5.29771	4.2616	4.27495	3.89542	3.56604	3.63064	3.04222	4.06248	1.97323	4.79568	4.23828	4.2784	1.95988	4.14201	3.05002	2.00463	4.75464	3.21438	3.59256	4.43482	3.93938	4.42237
INA	6.08936	6.30345	5.91814	3.47352	3.81697	5.72133	1.91018	5.52327	5.4198	5.83317	5.34271	4.9834	3.80398	5.21382	5.51836	5.24725	5.81143	5.71771	5.98739	5.79223	4.13978	4.74055	6.20785	3.56486	5.85653	5.87454	4.38593	3.77023	4.86903	2.822	5.37886	4.04224	1.97841	5.30856	5.8252	5.92154	3.29573	6.13516	5.73052	3.26485	6.14553	4.25416	6.21998	5.52415	4.6919	5.40308	6.12072	4.43573	5.11639
RP1	2.88546	4.04178	1.91915	3.95132	4.67309	2.81296	4.58843	4.33252	5.57657	3.64387	4.05421	5.8378	4.62482	5.1223	3.74614	4.3966	3.12583	4.18284	3.26987	3.04216	4.13978	2.09185	3.92144	4.76828	4.47504	3.64917	4.53565	4.11291	4.77849	5.0915	3.14209	2.00993	3.63064	4.77019	4.06248	3.03522	4.51706	1.9462	3.75895	5.39372	3.39408	5.02047	3.81979	5.22035	4.15578	3.12125	3.52065	3.93938	4.97655
FAT3	4.66693	4.6365	3.44953	4.71628	5.08048	3.51959	5.70571	5.62674	4.7453	4.49772	4.31152	5.01202	5.26712	4.67628	4.30003	5.45241	4.91741	5.05178	4.45659	3.50591	4.13978	4.95615	5.02567	5.38446	5.82994	3.64917	3.55091	4.63732	4.90754	4.57434	4.72322	2.00993	1.97841	5.81149	5.25816	1.97323	4.14547	3.87038	4.7025	4.68418	1.94433	5.10117	2.00463	3.77951	3.96772	3.59256	4.43482	5.07712	4.55974
TMEM90A	1.90756	3.76773	2.98693	3.01399	3.3381	2.81296	4.47548	2.71364	1.95319	4.85001	2.8573	4.53847	3.32509	4.18488	3	3.10641	3.12583	3.24469	1.9385	3.78684	4.13978	2.09185	3.92144	4.29385	3.49879	3.36863	3.83167	4.22956	3.32862	3.54254	3.14209	4.04224	4.28729	1.93815	4.16123	4.33629	4.4214	1.9462	1.93243	2.8303	2.93985	4.25416	2.00463	3.58093	3.69169	3.87218	3.24311	3.93938	3.57564
GPR156	5.84897	4.80433	3.73054	4.78669	4.95399	4.43625	4.8708	3.60751	5.09096	5.65169	4.23867	5.2963	4.80074	4.06802	5.23668	5.40039	4.61898	5.07246	4.0227	5.24873	2.02528	4.63693	4.25413	5.24598	5.48085	5.80054	3.83167	3.02487	5.14307	4.33927	4.83479	4.86464	4.48094	3.50842	5.02239	3.77828	5.55785	4.32138	4.2784	5.43745	5.13188	5.33894	2.00463	4.05141	5.43928	4.06497	3.99637	4.15945	4.1458
OTOP3	5.96794	5.94739	4.72147	1.97415	4.0884	6.06941	4.53545	6.37729	5.13159	5.20631	5.19924	5.27154	1.91747	6.13222	4.99533	5.30729	6.06156	5.95327	5.70798	6.12861	4.79493	2.09185	3.16844	4.85495	5.81644	5.76726	1.99235	6.1409	5.6432	6.10528	5.41562	3.10119	6.42266	1.93815	5.80825	4.23987	5.60948	5.44259	5.48734	2.8303	5.5602	4.93993	6.20196	5.19051	5.60215	5.89578	5.51664	5.67773	4.66505
SLC4A9	3.618	3.28928	4.95337	4.21806	3.3381	4.60258	3.02787	3.88603	1.95319	3.79783	3.30279	1.92734	1.91747	4.36154	3.46539	4.59777	4.49461	3.52413	4.0227	1.96301	2.02528	2.09185	4.11194	4.46493	3.97281	4.43571	1.99235	3.02487	3.80745	3.89392	4.83479	3.56604	3.63064	3.78903	4.16123	1.97323	3.57604	4.77921	3.75895	2.8303	4.39477	3.51752	2.00463	3.58093	1.91913	1.9512	3.24311	1.91031	3.57564
C4orf6	3.618	3.28928	2.98693	3.01399	3.3381	4.43625	3.77562	3.60751	1.95319	1.93246	4.56999	1.92734	3.32509	3.72499	3	3.58086	3.12583	3.24469	5.09425	3.04216	4.57012	2.09185	3.16844	2.83973	1.89017	4.21709	1.99235	1.93755	3.60908	4.75382	3.14209	3.8469	1.97841	4.5514	3.79225	3.77828	3.92561	4.13991	2.71501	2.8303	3.67499	1.929	3.07584	1.90476	3.96772	1.9512	1.95233	1.91031	3.57564
ABHD1	3.81606	4.22772	3.92657	5.39958	4.2717	4.09811	3.49514	5.05582	4.02626	4.8144	3.78158	3.59428	3.32509	5.20483	4.89622	4.96636	4.64538	4.62394	3.74808	4.98576	4.57012	2.09185	4.36611	4.03637	4.97624	3.64917	3.55091	3.48943	3.80745	2.822	5.11687	2.00993	2.90638	3.98401	5.0583	4.12249	4.74774	4.02043	5.11903	2.8303	2.93985	4.55717	4.69048	4.63772	4.15578	5.03934	3.87339	4.05996	4.1458
C1orf114	3.33731	4.47396	3.73054	3.01399	3.3381	3.24255	3.49514	4.46486	3.55175	4.11223	4.15409	4.24944	2.87605	4.71236	4.08826	3.85914	4.67023	4.98138	3.90057	1.96301	4.39818	2.09185	3.64332	4.29385	3.77894	3.36863	1.99235	3.48943	4.77849	4.82119	5.01283	3.10119	3.82961	3.04222	4.24464	3.03522	3.57604	3.39172	3.75895	4.20586	1.94433	4.13858	3.53889	5.12127	4.7417	3.12125	3.99637	2.86145	4.7233
GPR120	4.34041	4.22772	4.07439	4.52898	3.3381	1.9685	4.53545	2.71364	1.95319	3.44434	2.8573	2.8677	4.50041	4.85667	4.08826	4.47376	4.91741	4.7098	5.07279	3.04216	2.02528	2.09185	4.45767	4.03637	4.96666	3.84738	3.83167	3.48943	3.32862	4.49371	4.99207	2.00993	1.97841	4.42223	5.17316	3.03522	3.77455	1.9462	4.2784	4.34536	4.24029	3.99251	2.00463	3.77951	3.96772	3.87218	3.24311	4.43573	2.84807
ST8SIA6	5.36877	5.27014	3.44953	3.01399	3.61849	3.24255	1.91018	4.46486	4.87859	3.44434	4.37535	4.91869	4.82397	4.43104	3.74614	4.96636	5.21948	5.29754	5.39927	4.60769	4.6964	2.09185	3.64332	4.29385	4.65592	3.64917	1.99235	5.17639	5.05671	4.87888	4.62763	3.56604	3.35091	3.78903	4.92134	5.26678	4.6311	4.02043	4.99935	4.11976	2.93985	3.51752	3.07584	4.60275	3.69169	3.59256	4.43482	4.15945	3.92554
NME5	2.88546	3.76773	4.1916	3.01399	4.0884	3.87261	4.53545	4.85252	3.75112	1.93246	4.52834	4.44225	4.50041	4.99697	3.74614	3.85914	4.21245	4.59107	4.81114	3.50591	3.66739	2.09185	1.93492	4.35767	4.40689	2.91775	3.55091	3.48943	5.49945	5.02542	3.89542	2.00993	4.28729	3.04222	4.31651	1.97323	4.14547	4.88	3.13143	3.89549	2.93985	4.55717	4.01569	5.30174	4.6919	4.67375	3.87339	4.05996	4.30254
CHRNA7	4.97736	3.28928	3.44953	5.45304	5.39	4.09811	4.2321	5.77618	4.71826	4.86672	4.48257	5.2154	5.04226	5.29904	4.76242	5.36398	5.75784	5.73562	4.0227	5.02447	2.02528	2.09185	4.45767	4.61406	5.47297	4.21709	3.83167	5.1982	4.39702	5.46531	4.33768	2.00993	4.78415	5.71313	5.52884	5.00315	5.30416	3.87038	4.7025	4.54455	3.87268	5.60755	2.00463	4.82478	4.95535	5.11063	1.95233	4.24356	4.5977
WDR17	5.46416	3.76773	4.81454	3.01399	4.2717	5.53743	4.2321	4.15321	4.40984	5.38345	4.52834	1.92734	4.88652	4.43104	4.65429	5.09261	4.2718	5.10133	3.26987	3.78684	3.66739	2.09185	4.70912	4.62572	3.02964	4.54154	3.55091	4.22956	4.33387	3.89392	4.57048	2.00993	3.63064	4.13066	5.67399	3.03522	3.77455	2.9381	3.60463	3.54301	3.39408	4.25416	3.81979	4.3712	4.49546	3.87218	3.87339	4.76255	4.97655
C19orf46	4.69896	4.04178	5.77249	5.50659	4.2717	5.83894	3.77562	4.76451	3.27328	3.92182	5.7503	5.41369	3.60551	5.68436	5.04408	4.3966	4.71604	5.6149	5.6261	4.4237	5.13311	5.39928	1.93492	3.56486	5.08192	5.26307	1.99235	4.22956	5.60125	5.70433	5.08552	5.48252	5.73991	5.55693	4.24464	3.97446	4.94437	6.05413	3.98721	4.85483	5.18419	3.99251	5.58516	5.47956	5.02959	5.52076	3.52065	4.57293	4.84068
NLGN1	5.19742	5.16552	3.44953	5.60534	4.6004	3.51959	4.53545	5.62106	4.46142	5.11925	4.76086	5.66939	4.90533	4.54543	4.2046	5.25657	5.20814	5.4032	4.0227	4.80795	2.02528	2.09185	5.4583	4.87393	5.3075	4.37271	4.02692	5.42886	4.07861	4.01564	5.37886	4.04224	4.36036	4.49121	5.73782	3.03522	4.6311	3.39172	5.03072	3.54301	2.93985	5.11531	3.07584	5.32305	4.86283	4.06497	3.72024	4.57293	4.63268
FGF9	4.08637	4.3657	4.28787	4.1	4.40736	1.9685	5.0801	5.27287	4.58946	4.11223	3.58274	5.10806	2.87605	5.78675	4.08826	4.04994	4.94279	4.25629	3.54873	4.12998	2.02528	2.09185	4.45767	4.89204	4.36883	2.91775	3.83167	5.14075	4.45306	3.74168	3.61807	2.00993	3.82961	3.04222	4.88659	4.12249	3.77455	3.39172	3.13143	2.8303	1.94433	5.20073	3.07584	4.52342	4.86283	4.83533	3.99637	4.05996	3.92554
ZDHHC19	4.459	4.3657	4.91236	3.01399	3.81697	2.81296	3.49514	3.88603	3.27328	3.92182	3.58274	4.49279	4.1746	4.54543	3	4.30479	4.14564	3.99712	4.34776	3.98257	4.94211	2.09185	4.45767	1.90676	1.89017	4.37271	1.99235	1.93755	3.80745	3.54254	4.99207	2.00993	1.97841	3.78903	4.24464	4.33629	4.59623	3.6726	4.90001	1.95988	1.94433	1.929	3.53889	3.77951	3.21438	3.87218	3.24311	4.24356	3.29543
METTL11B	3.618	4.75542	2.98693	4.63224	4.51373	3.24255	4.63587	4.33252	3.27328	3.64387	2.8573	4.81868	4.50041	3.44411	3	4.1925	3.98165	2.80323	4.0227	3.50591	2.02528	2.09185	4.45767	3.76371	4.90335	4.37271	1.99235	3.02487	2.87895	3.89392	3.89542	2.00993	3.35091	3.04222	1.88259	3.97446	3.29573	4.39294	4.21878	3.89549	1.94433	3.05002	2.00463	3.30059	3.69169	3.87218	3.72024	4.24356	1.90037
C9orf152	3.9665	4.04178	5.71617	4.21806	3.3381	4.7977	3.97022	5.33393	3.90389	3.92182	5.4438	5.37479	3.32509	5.60546	4.91824	4.86794	4.87584	5.81154	5.92267	4.49323	4.57012	2.09185	3.64332	3.56486	3.97281	2.91775	3.55091	5.32739	6.02047	5.36354	4.89477	3.8469	5.48064	3.50842	5.34906	5.07384	4.74774	5.62941	4.94038	5.2626	5.24598	5.65265	5.09541	5.98031	5.36827	3.12125	4.32473	3.30932	5.44616
KCNJ1	1.90756	3.28928	4.07439	3.47352	2.88928	2.81296	3.77562	2.71364	3.55175	4.11223	1.92328	3.59428	3.32509	2.98019	3	3.58086	2.70643	2.80323	3.26987	3.78684	5.25779	2.09185	4.60063	4.03637	4.90335	3.64917	3.55091	1.93755	4.45306	2.822	3.61807	2.00993	3.35091	3.50842	3.59417	3.77828	4.8385	2.9381	3.13143	4.28019	4.02267	3.51752	3.07584	3.58093	3.69169	1.9512	4.25929	3.78821	4.04624
AMDHD1	3.9665	3.76773	1.91915	5.96941	5.78979	4.38393	4.9993	6.09227	6.09268	5.60767	3.93313	3.31415	5.74496	5.75593	4.65429	5.0771	5.82828	4.65449	4.54537	4.86739	3.66739	5.43107	4.86705	5.98163	4.69633	2.91775	3.83167	3.02487	3.95832	3.89392	6.05896	2.00993	4.10254	4.42223	4.82767	5.02213	5.19762	3.87038	5.38038	1.95988	4.14201	4.25416	4.01569	4.3712	4.49546	6.22342	4.43482	5.52862	4.55974
PDZRN4	4.75648	4.84805	4.4388	1.97415	5.06839	3.87261	5.67261	4.50198	5.15027	3.44434	5.36678	5.08636	5.26053	4.36154	4.2046	4.83877	4.06954	4.92555	4.58416	4.86739	2.02528	3.57965	5.49056	4.51069	5.02067	5.6708	1.99235	5.23799	1.91666	4.72866	5.25053	2.00993	3.35091	5.57307	4.31651	3.03522	4.14547	5.0954	4.59914	2.8303	4.02267	4.61014	2.00463	3.93078	4.7862	3.59256	4.92613	4.91017	4.89744
ENHO	4.87248	4.47396	4.4388	4.1	4.51373	3.24255	4.11644	5.50623	4.35226	4.41407	4.64329	3.59428	4.33085	5.17622	5.65388	4.89507	3.59982	5.45214	4.34776	4.69913	2.02528	2.09185	4.36611	5.01227	5.03699	3.84738	3.83167	3.02487	4.33387	4.8414	5.19641	3.10119	5.40384	3.98401	5.0583	3.97446	3.77455	5.22026	5.09477	3.89549	5.05653	5.0019	5.02144	5.18259	4.29564	3.12125	4.66506	3.78821	4.69518
C19orf77	5.00669	4.04178	5.77624	4.31511	5.15495	5.45085	3.77562	4.98496	1.95319	5.83583	4.64329	4.16509	4.1746	3.72499	5.40997	4.77301	4.41717	4.91019	5.70931	3.50591	4.13978	5.64936	4.97983	4.81392	3.88359	5.16969	1.99235	4.22956	2.87895	5.23643	4.92159	5.47146	4.42429	3.04222	4.06248	1.97323	5.16644	5.7965	3.40523	3.54301	5.09622	1.929	5.61917	4.15098	1.91913	4.86748	2.81055	4.70816	4.79772
CHRNA9	2.88546	4.80433	4.89012	3.01399	4.73535	3.24255	5.70051	4.15321	4.12747	6.03881	2.8573	4.53847	4.58704	3.72499	1.9036	4.3966	1.91133	4.37771	2.83132	1.96301	4.39818	2.09185	4.53461	5.35864	3.88359	4.94459	4.1739	5.67739	5.16166	3.89392	1.88593	4.30583	3.63064	1.93815	4.06248	3.4973	4.81768	3.39172	4.33188	1.95988	4.02267	3.51752	2.00463	3.58093	4.15578	3.59256	2.81055	4.61084	4.66505
LY6H	3.9665	3.28928	4.4388	3.75463	4.6004	3.51959	3.77562	3.40816	4.40984	1.93246	4.67585	4.74402	4.50041	4.80498	3.46539	4.80726	4.41717	3.52413	2.83132	4.12998	5.13311	4.95615	1.93492	4.89204	3.6535	3.64917	4.29036	4.32529	4.45306	4.27495	4.76395	3.56604	4.28729	4.13066	2.86137	3.03522	4.30188	4.80685	4.53684	4.01819	2.93985	4.13858	3.53889	3.93078	5.1269	4.56284	4.43482	4.70816	3.29543
KRT82	1.90756	3.76773	3.92657	3.01399	3.81697	3.24255	3.77562	3.13336	4.21328	4.89808	3.58274	3.94441	3.32509	3.72499	4.44962	1.88175	3.75402	1.89419	4.87215	4.12998	5.4353	2.09185	4.25413	4.29385	3.30008	5.24012	1.99235	4.32529	5.08038	2.822	4.08505	2.00993	4.42429	4.34202	1.88259	3.77828	3.57604	3.39172	3.60463	4.61971	5.78012	3.51752	3.53889	3.58093	4.57086	4.20942	2.81055	1.91031	2.84807
STAC2	3.81606	4.47396	5.2071	3.01399	4.5591	2.81296	4.89546	3.98932	4.83881	5.50441	5.18312	4.32213	4.45018	4.67628	3.74614	4.77301	3.59982	4.91019	5.15166	3.98257	4.39818	2.09185	5.84361	5.25864	3.30008	4.21709	5.14567	3.96569	4.62745	4.11626	5.01283	4.99867	3.63064	3.78903	4.06248	3.4973	4.94437	5.18349	4.46495	4.74035	5.28393	4.49728	4.01569	5.41921	4.63551	4.97491	4.38278	4.48606	3.57564
SLC23A1	4.26854	4.04178	5.39929	1.97415	5.06839	5.10725	3.77562	3.88603	3.27328	4.1879	5.12961	4.24944	4.74987	4.67628	5.32591	4.3966	3.87835	4.37771	4.97145	3.50591	3.66739	5.52248	1.93492	4.03637	4.5871	5.14952	3.83167	5.64235	4.7523	5.18726	4.22638	4.04224	4.36036	3.78903	4.88659	1.97323	4.55837	4.13991	4.42444	3.26485	5.55451	3.99251	4.87398	4.98149	4.15578	1.9512	4.09827	5.17362	4.55974
RANBP17	5.67496	4.70003	5.68768	3.75463	3.96802	3.51959	4.78592	4.56837	3.90389	1.93246	4.67585	5.60228	5.14123	5.20483	5.62655	4.3966	5.67223	5.58159	5.39927	1.96301	4.57012	2.09185	5.58816	5.44726	4.5616	5.4556	4.29036	4.22956	5.60125	4.27495	5.7414	5.6253	5.47684	6.02281	5.62287	5.70882	5.81242	5.68609	4.95295	4.45506	5.1204	3.05002	3.81979	5.02192	5.09114	5.42828	4.25929	4.73622	4.87944
IFNG	2.88546	3.76773	5.22545	4.1	5.2465	3.51959	4.81626	4.91109	4.21328	3.79783	3.58274	3.59428	5.48265	4.9431	5.4334	4.3966	3.98165	4.85995	3.26987	4.12998	5.13311	2.09185	3.92144	3.28494	4.40689	2.91775	5.58477	3.77023	4.6944	4.49371	5.17198	2.00993	2.90638	5.3585	3.79225	5.54144	5.03881	5.04138	3.60463	3.26485	2.93985	4.65749	4.84313	4.05141	4.7417	4.06497	4.63382	5.22054	4.23001
C20orf197	5.52481	1.94309	5.81914	4.39697	4.0884	5.36723	4.11644	4.33252	4.02626	5.5319	4.80924	4.32213	5.24694	2.98019	5.62206	4.30479	4.14564	4.18284	5.6916	4.24687	5.28299	2.09185	4.11194	4.83496	4.47504	4.70009	3.08578	4.7891	4.39702	5.81726	4.9466	5.17607	4.97704	3.04222	4.16123	1.97323	4.47164	4.45549	4.50226	5.49446	6.27909	3.51752	5.26522	4.3712	5.83738	4.32348	3.72024	4.48606	5.48367
NXF3	5.56289	3.28928	3.92657	4.21806	3.3381	4.38393	4.32696	2.71364	3.27328	3.1688	3.93313	2.8677	3.80398	3.92061	3.46539	3.85914	3.75402	3.52413	5.2084	3.98257	2.02528	2.09185	1.93492	3.76371	4.11834	4.3007	1.99235	3.96569	5.12342	5.48601	5.31337	3.10119	4.53172	4.13066	5.48357	3.77828	4.4214	4.02043	3.60463	5.00291	4.64757	3.05002	4.9782	4.93608	5.14348	1.9512	3.87339	3.58965	3.77426
RTBDN	5.44309	3.28928	4.28787	3.47352	5.6596	5.30678	3.77562	2.71364	4.77074	5.71342	4.7061	4.61807	4.80074	4.18488	4.56339	4.30479	3.87835	1.89419	3.74808	3.04216	3.66739	2.09185	1.93492	2.83973	2.62465	4.11812	1.99235	3.48943	3.80745	4.4475	5.03245	4.75628	5.81877	3.78903	4.57081	4.48753	4.59623	4.32138	3.13143	4.01819	5.52412	4.55717	5.1841	4.05141	3.69169	3.12125	4.09827	4.94375	3.77426
CYorf15B	1.90756	1.94309	5.39929	1.97415	4.76336	4.48355	5.01699	1.91687	5.17652	4.49772	5.37136	4.8408	4.9404	5.86118	5.7698	1.88175	5.5792	1.89419	4.99952	3.04216	2.02528	2.09185	1.93492	5.52765	5.92261	4.11812	5.04536	3.02487	5.94904	5.57121	5.70361	4.75628	5.99066	5.62162	1.88259	5.17167	5.93674	5.04138	5.77626	5.64227	5.04228	5.23159	4.64224	5.19822	5.58777	4.95073	1.95233	5.83041	5.81413
LCN12	4.63238	3.28928	5.25115	3.75463	3.96802	5.26539	3.02787	4.53638	1.95319	3.64387	4.76086	3.79302	2.87605	4.36154	4.44962	4.1925	4.529	1.89419	3.26987	1.96301	4.13978	2.09185	1.93492	2.83973	3.88359	3.36863	1.99235	3.02487	4.17783	4.57434	4.42858	5.29361	2.90638	4.73441	4.24464	3.4973	3.77455	5.65635	3.88357	1.95988	4.02267	3.79801	4.01569	4.42747	3.21438	1.9512	3.72024	3.93938	3.29543
BAAT	1.90756	4.22772	3.73054	1.97415	3.81697	1.9685	3.49514	4.33252	4.21328	3.1688	1.92328	4.16509	2.87605	4.06802	4.79299	3.58086	3.98165	3.72323	3.74808	3.04216	2.02528	2.09185	3.16844	3.56486	4.53449	2.91775	1.99235	4.22956	3.32862	3.54254	3.61807	4.83152	4.48094	3.98401	4.16123	3.03522	3.77455	3.6726	4.33188	3.26485	4.64757	3.51752	2.00463	4.3077	3.21438	3.12125	4.09827	3.30932	3.57564
SERPINB11	5.07096	5.63944	4.9723	5.42212	5.31201	5.94183	1.91018	5.46617	4.02626	3.1688	4.85242	5.19975	1.91747	5.51884	5.57521	5.40601	5.48378	6.12378	6.29466	5.76218	6.2411	2.09185	5.67554	3.76371	5.3246	4.37271	3.08578	5.49231	6.40276	5.58745	6.1024	4.04224	6.26876	5.26733	5.15652	4.65104	4.74774	5.73104	5.44299	5.25604	5.68435	4.49728	6.18887	5.08054	5.80084	4.32348	6.10206	3.78821	5.95964
SULT1E1	5.89592	4.22772	5.05462	1.97415	5.91517	3.87261	5.09427	5.25298	4.58946	4.11223	6.00124	5.61438	5.26712	5.841	5.98337	4.98736	4.06954	4.89415	5.12415	5.20759	2.02528	5.77197	3.64332	2.83973	5.97165	6.15203	5.87867	5.64699	5.98533	4.87888	4.22638	3.56604	6.14043	6.27747	5.36701	4.12249	5.81786	5.26113	5.63394	5.01629	6.17013	3.51752	5.33044	5.11156	5.24103	3.59256	1.95233	2.86145	4.81978
SCN11A	3.81606	3.28928	2.98693	1.97415	3.3381	2.81296	3.97022	3.60751	4.58946	2.74558	4.43191	2.8677	3.95492	4.18488	4.30003	3.85914	4.45744	4.55557	2.83132	4.12998	2.02528	2.09185	3.64332	2.83973	3.88359	2.91775	3.55091	3.02487	3.32862	3.89392	4.22638	3.10119	1.97841	1.93815	5.04673	3.03522	4.22945	3.39172	2.71501	3.74254	2.93985	4.49728	2.00463	3.30059	4.15578	3.59256	3.99637	4.83259	3.57564
PLP1	3.9665	4.04178	2.98693	4.1	4.67309	3.24255	5.13357	4.65265	4.77074	3.79783	4.8724	3.79302	3.80398	3.72499	4.44962	5.2744	5.43019	5.43674	4.76474	4.55397	5.7923	2.09185	3.16844	4.13635	3.49879	3.36863	4.29036	5.58783	5.10255	2.822	4.92159	3.8469	5.39892	3.98401	4.78285	1.97323	4.36524	2.9381	1.93243	4.28019	4.24029	5.03813	2.00463	4.63772	4.86283	4.8004	5.16562	3.78821	4.77438
OPCML	1.90756	4.04178	1.91915	3.47352	4.0884	1.9685	3.97022	2.71364	4.02626	4.83261	4.05421	3.79302	4.80074	3.44411	3.74614	4.64881	4.87584	3.24469	5.16889	1.96301	2.02528	4.05762	5.02567	4.55237	4.2826	3.36863	3.08578	3.77023	3.95832	3.26321	1.88593	2.00993	4.53172	4.34202	4.57081	3.4973	3.29573	3.39172	3.60463	3.74254	2.93985	4.25416	2.00463	3.77951	3.69169	4.32348	3.52065	3.93938	4.04624
ESRRG	4.92854	1.94309	5.02389	4.8741	3.61849	4.56615	5.49701	5.47612	5.64265	4.36622	5.1484	4.58003	4.25854	5.31231	4.61117	4.83877	5.57424	5.57012	5.36932	4.4237	2.02528	2.09185	4.75462	5.49597	4.81313	3.36863	5.04536	4.8198	5.54888	4.91311	5.06871	2.00993	4.69285	1.93815	5.51369	3.77828	5.08334	4.39294	5.45132	4.68418	4.14201	5.18978	4.80975	5.51096	5.4329	5.6255	3.87339	4.05996	4.77438
BCL2L15	4.50883	3.28928	4.81454	3.95132	2.88928	4.7977	3.97022	4.93736	4.02626	4.02474	5.36678	5.07501	4.1746	5.48493	4.65429	5.29128	3.98165	5.13639	5.81641	3.04216	4.13978	2.09185	3.16844	3.76371	4.71518	2.91775	3.08578	5.05614	5.94268	5.7488	3.89542	4.04224	4.61935	4.88847	5.22543	4.33629	4.04609	5.8893	3.98721	4.68418	4.68483	5.07103	5.19691	5.48256	5.20267	3.59256	4.32473	5.08807	4.89744
FBLL1	2.88546	4.22772	5.0075	3.47352	4.81427	4.94614	4.11644	4.21998	4.12747	3.1688	3.93313	3.94441	4.33085	3.44411	5.2098	3.10641	3.98165	5.07246	2.83132	4.49323	5.62038	5.27987	4.60063	2.83973	4.5871	3.64917	1.99235	3.77023	3.60908	3.54254	4.22638	3.56604	3.98136	4.13066	5.35365	3.03522	2.84719	4.32138	3.98721	4.40322	2.93985	4.77463	2.00463	1.90476	1.91913	4.32348	4.25929	3.58965	2.84807
CLCNKB	3.9665	4.22772	5.64531	3.47352	4.34408	3.24255	3.77562	3.88603	2.83619	4.49772	4.67585	4.77044	3.60551	4.59347	3.94133	4.64881	3.98165	4.51703	5.29895	3.78684	2.02528	3.57965	3.64332	4.51069	4.36883	4.70009	1.99235	4.32529	4.82631	2.822	4.83479	4.83152	3.35091	4.13066	3.94271	4.23987	4.91223	5.67534	4.07537	1.95988	4.32329	3.99251	4.37669	4.84571	1.91913	4.32348	1.95233	3.58965	3.57564
CLEC9A	4.59484	3.28928	5.0075	1.97415	4.97038	1.9685	4.67864	3.98932	4.12747	1.93246	5.24327	1.92734	4.50041	4.43104	5.02856	4.98736	3.12583	4.59107	4.0227	3.50591	2.02528	2.09185	3.16844	4.13635	4.63416	4.37271	4.29036	4.40592	3.80745	4.72866	4.42858	3.8469	2.90638	4.5514	4.06248	4.77075	3.77455	3.39172	3.75895	4.01819	4.80811	4.34892	4.01569	3.93078	3.69169	3.87218	3.87339	5.23478	5.28566
NRXN3	5.34431	5.66345	4.72147	6.13244	4.73535	3.71919	5.09427	6.27658	4.7453	5.34871	4.97441	6.01558	5.32642	5.89474	5.65785	5.46175	5.83945	5.87597	5.41123	5.70093	2.02528	5.25516	5.81783	4.87393	6.03178	6.07386	4.69736	4.68059	5.67152	5.93353	6.06844	4.04224	6.12863	5.03539	6.07439	4.5486	4.79568	4.13991	5.94927	4.54455	4.75095	5.59064	4.52748	5.94929	4.98181	4.56284	4.72151	4.76255	5.37447
TEX19	2.88546	3.28928	3.92657	3.95132	3.96802	4.69703	4.53545	5.14461	4.21328	4.56877	2.8573	3.59428	3.60551	4.77636	3.46539	4.30479	3.87835	3.72323	2.83132	4.24687	3.66739	4.63693	5.38067	3.56486	1.89017	3.84738	4.77978	1.93755	5.24862	1.91419	5.19641	4.482	3.98136	3.04222	4.43501	4.12249	4.7724	4.02043	4.98829	3.74254	4.32329	4.49728	3.07584	4.3077	4.15578	4.67375	3.24311	3.30932	3.29543
SCT	4.59484	4.6365	4.75488	4.1	5.48355	3.71919	5.57875	4.42459	5.31272	1.93246	3.93313	4.91869	5.27358	4.06802	4.08826	4.04994	4.32503	4.25629	4.12367	1.96301	4.13978	5.27987	4.60063	5.23278	4.5871	3.36863	5.14567	1.93755	2.87895	4.79996	4.22638	2.00993	3.82961	5.03539	4.48486	4.41758	3.92561	1.9462	3.40523	3.26485	3.39408	4.42873	3.81979	3.30059	4.92694	5.01908	5.24644	5.0541	4.69518
SLC26A7	3.33731	3.76773	4.55375	4.31602	3.81697	1.9685	3.49514	3.88603	4.35226	3.64387	3.58274	4.53847	3.32509	4.06802	3.74614	4.83877	3.12583	3.72323	3.54873	1.96301	4.6964	2.09185	4.11194	3.56486	4.84113	3.64917	3.08578	3.02487	4.17783	3.26321	4.80091	3.10119	3.35091	3.04222	3.31352	3.97446	4.30188	3.39172	1.93243	4.40322	3.39408	4.49728	4.01569	2.85306	4.63551	1.9512	4.52478	5.13824	4.91465
GCGR	4.26854	4.04178	5.16702	3.01399	4.2717	5.09709	4.32696	5.99814	3.55175	4.96696	3.30279	4.90062	3.32509	5.11042	5.5116	4.3966	4.81247	3.99712	4.20921	1.96301	5.04953	4.50447	3.64332	4.85495	4.99468	4.11812	1.99235	3.02487	4.92543	5.07081	5.29668	4.40142	4.65761	5.09881	4.99629	3.97446	4.6311	4.39294	5.26313	3.89549	5.31137	4.80738	5.81856	4.3712	3.69169	5.32053	3.99637	4.43573	3.29543
MT1A	4.18513	1.94309	3.44953	3.01399	4.40975	1.9685	4.40684	3.13336	5.28364	2.74558	3.58274	4.53847	4.80074	3.92061	4.08826	4.86794	4.32503	3.72323	2.83132	3.04216	4.57012	2.09185	4.45767	4.59055	3.6535	3.84738	4.38593	4.11291	2.87895	3.54254	4.80091	4.71307	1.97841	3.78903	3.31352	5.24785	3.29573	2.9381	2.75161	2.8303	3.39408	1.929	3.53889	4.3712	4.15578	4.8004	3.24311	4.06431	4.7233
TRIM74	2.88546	5.16552	4.57024	4.21806	1.93233	4.56615	4.53545	4.46486	3.55175	4.1879	4.31152	4.53847	1.91747	5.23112	4.98991	3.85914	4.73719	3.24469	5.08369	1.96301	3.66739	5.05547	4.86705	2.83973	4.90403	4.86363	3.55091	4.11291	4.95228	4.70191	5.28799	4.04224	4.72545	4.42594	1.88259	3.97446	3.29573	4.99486	4.46495	3.74254	5.20303	3.51752	3.81979	4.70023	1.91913	4.62168	4.38278	3.30932	1.90037
IDO2	3.618	1.94309	4.89012	3.47352	3.61849	1.9685	4.32696	4.3807	2.83619	3.44434	4.15409	1.92734	4.1746	4.28074	4.08826	4.1925	3.75402	3.52413	2.83132	1.96301	2.02528	2.09185	3.16844	3.56486	4.32756	3.36863	4.59609	3.48943	3.80745	4.57434	4.62763	3.10119	1.97841	5.08399	4.37931	4.33629	4.74774	3.39172	3.88357	4.11976	3.67499	5.14198	4.01569	1.90476	4.15578	3.12125	3.24311	4.98913	4.93113
FAM106C	5.059	3.28928	1.91915	4.67623	3.61849	4.75032	4.32696	4.15321	4.35226	4.79533	3.93313	3.59428	3.60551	3.44411	3.94133	3.85914	4.8609	3.99712	2.83132	4.12998	2.02528	2.09185	4.65821	4.92589	5.42281	1.94704	3.83167	1.93755	4.39702	3.26321	4.08505	2.00993	4.10254	3.50842	3.59417	3.4973	5.14093	2.9381	4.94038	4.20586	3.87268	4.13858	3.07584	4.3077	4.49546	4.8004	4.56407	4.24356	3.77426
ZNF883	5.94065	4.9233	5.66929	4.21806	5.46639	6.02201	5.41855	4.3807	4.8592	5.59239	5.68056	4.53847	5.02933	4.99697	5.5407	5.42232	5.36089	5.53467	5.88181	5.71674	4.13978	2.09185	4.36611	5.06024	4.44216	6.00402	5.80598	4.58941	4.80309	4.60987	5.50393	6.07329	5.82295	4.60468	5.81533	4.23987	5.38726	6.02611	4.78575	4.20586	5.71116	4.61014	5.96336	3.77951	4.7417	4.20942	4.69421	5.0541	4.89744
CD300E	5.37802	1.94309	5.18765	3.75463	1.93233	3.24255	4.47548	3.76174	3.75112	3.64387	4.43191	4.68564	4.77609	4.36154	3.46539	5.31498	4.56103	5.12795	3.26987	4.80795	2.02528	2.09185	4.83293	4.85495	4.71518	3.99806	4.69736	4.11291	3.60908	4.20142	4.76395	4.04224	3.35091	4.42223	3.79225	4.41758	4.95946	4.02043	3.75895	3.74254	2.93985	3.51752	2.00463	3.58093	5.3518	1.9512	4.63382	3.58965	4.51832
CAMP	1.90756	1.94309	4.64555	1.97415	1.93233	3.99593	3.02787	3.60751	3.27328	2.74558	4.73438	3.59428	3.60551	5.23112	4.65429	4.89507	4.93032	4.73495	4.78858	3.98257	3.66739	5.82303	5.77894	4.89204	1.89017	3.64917	3.55091	1.93755	4.2616	4.60987	5.74307	4.66523	2.90638	1.93815	2.86137	5.23798	3.77455	3.39172	3.60463	4.34536	3.87268	4.34892	5.40535	4.23514	4.29564	4.67375	4.32473	4.53151	4.55974
KEL	1.90756	3.76773	3.73054	4.31511	3.3381	2.81296	3.97022	4.07721	2.83619	4.3133	4.23867	5.01202	3.80398	5.13381	4.30003	4.53998	5.50396	4.18284	3.54873	3.50591	2.02528	5.65662	5.51487	3.56486	5.05261	3.36863	3.08578	3.96569	5.14307	4.64276	5.15903	3.56604	3.35091	5.95908	3.59417	3.97446	3.92561	3.87038	3.88357	3.89549	3.87268	5.75831	2.00463	3.30059	3.21438	3.59256	4.60029	5.7318	5.80518
KLKB1	3.618	1.94309	3.92657	3.75463	3.81697	3.24255	3.97022	2.71364	3.55175	3.1688	2.8573	3.59428	3.95492	3.72499	4.3805	3.10641	3.12583	3.52413	3.26987	1.96301	2.02528	2.09185	4.25413	3.28494	5.37637	3.36863	3.08578	3.77023	4.39702	4.11626	4.62763	2.00993	1.97841	4.60468	4.16123	3.03522	4.4214	2.9381	3.13143	3.89549	2.93985	1.929	3.07584	4.3712	4.15578	3.12125	1.95233	4.53151	4.30254
GABRR2	4.08637	3.28928	1.91915	3.47352	1.93233	2.81296	3.49514	3.60751	3.27328	4.45773	3.93313	3.94441	1.91747	4.06802	3.94133	4.59777	4.21245	2.80323	2.83132	3.04216	2.02528	2.09185	4.25413	4.51069	4.7505	2.91775	3.08578	3.02487	3.60908	4.11626	4.33768	2.00993	3.63064	3.50842	4.31651	3.03522	5.02674	3.6726	3.13143	4.01819	2.93985	3.79801	2.00463	3.93078	3.69169	3.12125	3.52065	3.78821	4.5977
CNR2	4.08637	1.94309	4.07439	1.97415	1.93233	3.24255	3.97022	3.13336	1.95319	2.74558	4.7061	3.31415	4.07535	4.06802	3.94133	4.77301	3.12583	4.47496	4.28311	4.7386	3.66739	2.09185	3.16844	4.35767	3.77894	2.91775	1.99235	4.11291	2.87895	5.02542	4.67812	2.00993	1.97841	4.34202	3.94271	1.97323	3.57604	3.39172	3.13143	4.5837	2.93985	4.25416	3.07584	4.88442	3.96772	3.12125	4.56407	5.81422	5.80182
LOC100101266	3.33731	1.94309	4.07439	1.97415	3.3381	3.71919	3.49514	3.40816	1.95319	3.79783	2.8573	4.65317	3.80398	4.36154	4.3805	4.30479	3.75402	3.87538	3.74808	3.78684	4.13978	5.47355	4.45767	4.13635	5.08192	4.21709	3.08578	3.02487	4.5032	3.89392	3.14209	3.8469	4.20263	4.6953	4.43501	3.77828	4.14547	1.9462	3.40523	3.54301	4.45722	3.05002	3.07584	3.77951	3.96772	3.87218	3.52065	3.58965	3.29543
SLC6A3	4.94554	1.94309	3.73054	3.01399	3.3381	1.9685	4.2321	4.89726	4.50808	4.1879	1.92328	3.94441	3.80398	4.85667	5.05896	4.1925	4.21245	4.59107	2.83132	4.7386	2.02528	2.09185	4.97983	3.76371	4.32756	3.99806	3.55091	4.32529	2.87895	4.72866	4.33768	3.10119	4.28729	1.93815	4.24464	3.4973	3.77455	4.51092	3.75895	3.54301	5.10851	3.05002	4.01569	3.77951	4.40564	3.59256	3.72024	1.91031	4.42237
C6orf25	4.40331	4.56236	1.91915	1.97415	3.81697	4.75032	4.53545	4.33252	1.95319	3.44434	3.58274	1.92734	4.45018	4.06802	1.9036	4.53998	5.07541	4.25629	2.83132	4.65575	2.02528	2.09185	3.92144	4.29385	2.62465	4.49158	1.99235	5.03987	3.60908	4.27495	4.08505	3.56604	3.63064	3.04222	4.75841	3.77828	2.84719	3.87038	3.60463	4.01819	4.64757	1.929	2.00463	4.15098	4.15578	3.59256	3.24311	3.30932	4.04624
ANKRD31	3.9665	4.3657	2.98693	4.39697	4.18777	4.09811	3.02787	3.13336	4.21328	3.1688	3.30279	3.59428	4.07535	3.92061	3	1.88175	3.12583	2.80323	1.9385	1.96301	4.39818	2.09185	3.64332	1.90676	3.6535	3.64917	1.99235	5.27346	4.33387	3.54254	3.14209	3.10119	3.63064	1.93815	4.31651	1.97323	4.22945	2.9381	4.15171	4.61971	4.32329	3.51752	2.00463	4.05141	1.91913	4.06497	3.72024	3.58965	2.84807
LOC100134868	1.90756	3.28928	3.44953	3.95132	3.61849	4.87873	4.58843	3.98932	3.90389	1.93246	4.43191	4.16509	2.87605	3.92061	4.3805	4.04994	4.2718	3.24469	3.26987	1.96301	2.02528	2.09185	3.16844	3.91532	1.89017	5.01141	1.99235	1.93755	4.39702	4.57434	4.22638	4.18931	1.97841	4.13066	1.88259	4.65104	4.66341	4.13991	1.93243	2.8303	4.68483	3.05002	2.00463	3.58093	1.91913	1.9512	3.52065	3.58965	1.90037
MYO1H	5.32866	3.76773	5.06906	1.97415	2.88928	5.39774	4.11644	4.78374	3.75112	2.74558	5.0166	4.32213	4.45018	4.85667	4.93905	4.3966	5.02999	3.87538	4.71246	5.20759	5.28299	5.27987	4.36611	2.83973	5.39792	5.01141	3.08578	5.65155	4.66224	5.22313	5.15903	5.14684	5.1992	3.98401	5.56548	1.97323	4.04609	4.56054	4.15171	4.28019	6.00086	1.929	4.58834	4.23514	3.69169	4.83533	3.24311	4.64575	4.1458
ST8SIA5	3.9665	3.28928	4.1916	4.39697	1.93233	1.9685	5.0801	3.60751	5.09096	4.7089	2.8573	4.79528	4.07535	4.18488	3.74614	4.1925	4.95488	3.52413	4.0227	4.34285	2.02528	4.74055	4.25413	5.34954	3.88359	3.84738	4.77978	3.48943	3.32862	3.89392	4.89477	3.10119	4.42429	3.04222	3.59417	3.77828	5.01424	3.6726	4.2784	3.54301	2.93985	4.73904	2.00463	4.15098	5.32526	5.38266	3.99637	2.86145	4.1458
MATN1	3.09748	3.8952	3.54349	4.49796	4.85171	3.44928	4.28641	3.71471	3.57678	4.61085	2.89207	3.76674	4.46378	3.80871	1.9036	3.87908	3.15487	2.82064	3.11725	3.04216	3.66739	5.30293	1.93492	3.63097	4.2942	3.7636	1.99235	3.56487	3.62736	2.83928	3.76626	2.00993	1.97841	4.50072	4.24542	3.86426	3.99851	2.9381	3.96192	4.14161	3.75325	4.35323	2.00463	3.82414	3.26634	1.9512	4.3216	4.40391	4.26247
GRIN2A	4.7287	1.94309	4.07439	3.95132	5.83558	4.38393	5.63677	5.18483	5.42755	5.22495	4.7061	4.32213	5.68124	3.44411	4.30003	4.64881	5.07541	4.99409	5.08369	3.04216	4.39818	2.09185	4.11194	6.15073	5.00354	3.99806	4.64953	5.25621	4.07861	4.60987	5.25053	3.56604	4.61935	5.98497	5.58998	3.97446	5.69707	3.87038	4.2784	4.28019	3.39408	6.11544	3.81979	5.18259	4.86283	4.32348	4.09827	4.83259	5.20826
CDHR5	4.55386	4.04178	4.9723	1.97415	2.88928	2.81296	3.49514	4.07721	3.27328	2.74558	3.30279	4.16509	2.87605	4.18488	3.46539	4.1925	4.2718	3.99712	2.83132	3.50591	3.66739	4.05762	3.64332	2.83973	4.69633	3.84738	3.08578	3.48943	1.91666	4.33927	3.61807	4.482	3.63064	1.93815	4.24464	3.03522	4.6311	4.39294	3.13143	2.8303	4.14201	3.79801	5.22124	4.3077	3.21438	4.20942	3.87339	4.48606	2.84807
KLHL14	4.459	4.04178	4.1916	1.97415	3.3381	3.71919	4.71753	4.07721	3.55175	4.1879	4.60814	5.81948	3.60551	4.96194	4.08826	4.73563	4.59098	4.32061	4.54537	4.98576	2.02528	2.09185	4.11194	4.13635	4.32756	3.36863	3.55091	4.75595	5.03136	4.79996	4.50496	2.00993	3.35091	3.50842	5.39598	3.03522	3.57604	3.39172	3.98721	4.54455	3.67499	5.02047	3.07584	4.99547	4.6919	3.12125	4.83658	5.58888	5.63135
LOC349196	4.66693	4.70003	4.4388	4.71628	3.3381	2.81296	3.02787	3.76174	1.95319	3.92182	3.85443	4.81868	4.1746	4.43104	3.74614	4.92331	5.12377	4.19683	3.26987	4.80795	4.13978	2.09185	3.92144	4.13635	5.1943	3.99806	3.83167	3.02487	4.40471	4.49371	3.61807	3.10119	3.82961	3.04222	4.78285	3.4973	4.7724	4.23828	3.60463	1.95988	3.87268	4.49728	2.00463	4.82821	3.69169	4.06497	4.09827	4.05996	4.51832
TCAP	4.59484	3.76773	5.6768	4.52898	5.27434	5.01659	6.46422	4.3807	6.67643	4.36622	3.93313	4.74402	5.33177	4.43104	4.97752	4.3966	4.84539	5.64441	4.20921	4.49323	3.66739	6.47797	3.64332	6.4728	4.94672	4.3007	6.36429	3.96569	4.45306	5.12949	4.57048	4.04224	3.63064	4.77019	4.82767	4.12249	3.57604	3.6726	5.44015	3.26485	4.96129	4.55717	5.02144	5.46082	6.42899	6.78065	5.87932	4.73622	3.77426
CLNK	3.9665	4.3657	3.44953	3.01399	3.81697	2.81296	4.32696	3.88603	1.95319	1.93246	4.05421	3.59428	4.25854	4.28074	4.3805	4.64881	3.75402	3.72323	3.74808	3.50591	3.66739	2.09185	1.93492	3.56486	3.77894	3.36863	3.55091	4.11291	3.60908	4.53581	4.83479	2.00993	1.97841	3.04222	4.16123	3.77828	4.14547	2.9381	1.93243	2.8303	3.39408	4.55717	3.07584	3.93078	3.96772	1.9512	3.52065	4.91017	4.66505
PRSS30P	3.618	3.28928	2.98693	1.97415	3.3381	5.70664	3.49514	4.07721	3.27328	3.64387	5.09934	3.59428	1.91747	3.72499	3.94133	4.04994	4.37322	2.80323	5.20085	3.04216	2.02528	2.09185	1.93492	4.22093	3.02964	3.64917	3.55091	3.48943	3.60908	4.33927	4.9466	2.00993	1.97841	3.78903	4.24464	1.97323	4.14547	1.9462	3.40523	3.89549	3.39408	3.51752	2.00463	2.85306	3.21438	4.20942	4.18462	3.30932	3.77426
WNT16	5.93666	3.28928	3.73054	4.98732	3.61849	5.74952	4.47548	5.6444	4.55051	4.02474	5.38907	4.24944	3.95492	4.28074	5.54679	4.04994	1.91133	4.51703	5.4033	3.78684	2.02528	2.09185	4.79564	4.71687	5.28186	3.64917	3.55091	5.57604	5.06874	4.97347	4.67812	5.40913	3.98136	4.42223	5.26431	4.96208	5.15815	5.43395	4.38028	3.26485	4.85825	3.99251	5.19691	4.67012	4.49546	4.49539	4.4819	4.76255	4.79772
METTL7B	5.02049	4.75542	5.14502	5.8564	5.52387	3.24255	5.84173	4.3807	5.14106	5.68195	4.31152	4.91869	5.39393	5.11042	5.66175	5.71848	4.89018	5.85626	5.3868	3.50591	4.99952	5.96178	5.80906	5.92413	4.32756	4.94459	5.65699	4.47524	3.32862	4.49371	5.58661	4.55125	2.90638	3.98401	6.03251	4.83523	5.63681	3.39172	4.82183	4.01819	4.51261	5.18978	3.53889	4.96695	5.84007	5.51633	4.63382	4.94375	4.74965
SLC12A3	3.9665	1.94309	4.55375	1.97415	5.04299	2.81296	3.77562	3.13336	3.75112	1.93246	4.60814	3.59428	4.95678	4.06802	3.74614	4.77301	4.37322	4.87743	5.61116	3.50591	2.02528	4.82494	4.11194	4.13635	4.2826	5.14952	1.99235	4.63732	3.60908	4.77753	4.62763	5.08015	1.97841	3.04222	4.80589	1.97323	4.4214	3.6726	2.71501	3.89549	3.67499	4.34892	3.07584	4.05141	3.96772	1.9512	4.4819	5.1979	4.89744
EXTL1	3.33731	4.6365	1.91915	3.47352	4.81427	3.51959	4.81626	4.15321	4.50808	4.1879	3.78158	4.38583	4.74987	1.89913	3	4.30479	3.59982	3.72323	2.83132	3.98257	4.13978	2.09185	4.45767	5.18192	5.12786	3.84738	4.1739	3.77023	2.87895	3.74168	3.89542	3.56604	1.97841	4.73441	4.24464	3.03522	3.57604	1.9462	3.60463	3.54301	1.94433	4.13858	2.00463	3.30059	4.49546	5.46249	4.18462	4.15945	3.92554
CCBE1	5.15418	4.47396	4.75488	5.13177	5.79989	3.87261	5.70571	4.62629	5.0198	5.66792	3.58274	5.85919	5.57851	4.59347	5.55271	5.06091	4.45744	4.96818	3.74808	4.60769	4.57012	5.16865	5.4583	5.61433	5.08192	4.43571	5.64286	4.8198	5.79548	4.27495	4.76395	5.3483	3.98136	3.98401	5.02239	5.0896	5.73261	3.87038	5.21389	5.92224	3.87268	3.51752	4.16341	4.15098	5.22874	3.12125	4.4819	4.92734	5.52695
PLAC1	5.10458	3.28928	5.51876	5.00646	5.56409	5.87877	5.24777	5.37806	5.2086	6.04526	5.62782	5.98401	4.95678	4.67628	5.61752	4.3966	3.75402	5.04097	6.08592	5.16071	4.39818	5.72596	3.92144	4.03637	4.44216	6.16488	3.83167	5.15304	5.55139	5.74032	5.77838	5.21576	5.72955	3.04222	4.31651	3.97446	5.30943	5.1635	5.61183	5.41036	5.66983	4.98236	5.50162	4.42747	5.3839	4.06497	3.24311	4.97461	5.22253
RPL21P44	3.33731	1.94309	2.98693	3.47352	2.88928	2.81296	3.49514	2.71364	3.27328	3.44434	3.30279	3.59428	3.32509	1.89913	3.94133	4.30479	4.06954	3.87538	2.83132	3.50591	3.66739	4.05762	1.93492	3.76371	4.2333	3.64917	3.08578	4.22956	3.80745	4.39636	3.89542	4.30583	4.20263	3.04222	1.88259	1.97323	4.36524	3.39172	3.75895	2.8303	3.67499	3.99251	3.53889	4.05141	1.91913	4.20942	3.99637	4.15945	4.30254
AQP6	4.26854	4.47396	5.29711	3.47352	3.61849	4.38393	3.49514	4.15321	4.50808	3.44434	1.92328	4.65317	2.87605	4.28074	4.44962	4.1925	3.40036	4.62394	4.0227	3.50591	4.6964	2.09185	4.25413	3.91532	4.11834	4.62781	1.99235	3.77023	5.04426	3.89392	4.22638	2.00993	5.54746	3.50842	4.06248	3.4973	4.36524	3.6726	2.71501	3.89549	5.3868	3.51752	4.92949	4.3077	4.92694	3.59256	1.95233	2.86145	1.90037
CCR3	5.0466	3.28928	3.44953	4.58348	4.34408	1.9685	3.97022	4.33252	2.83619	4.92715	3.93313	4.79528	4.72189	4.06802	3	4.3966	3.12583	3.87538	1.9385	4.34285	4.39818	3.57965	4.36611	4.29385	2.62465	3.64917	3.55091	3.02487	3.80745	4.33927	3.89542	3.10119	1.97841	3.50842	4.43501	3.4973	4.92864	3.87038	1.93243	3.26485	3.39408	3.51752	2.00463	3.30059	4.86283	3.87218	2.81055	4.24356	3.57564
IFNE	3.81606	4.04178	5.45062	4.21806	1.93233	5.09709	5.35754	4.07721	4.50808	5.21265	4.37535	4.81868	4.07535	3.72499	4.79299	4.73563	2.70643	3.99712	4.28311	1.96301	5.20097	2.09185	4.11194	2.83973	3.02964	5.04077	1.99235	5.51196	5.46765	5.24921	4.80091	5.35657	5.46121	4.80316	1.88259	5.49717	5.13197	4.68341	4.15171	5.44112	5.22089	1.929	2.00463	5.04655	5.02959	5.42218	4.90976	5.042	4.1458
GUCA1A	5.13521	5.21445	4.89012	3.75463	5.31787	2.81296	4.58843	4.3807	3.75112	2.74558	3.58274	5.02552	5.05474	3.72499	4.56339	4.53998	3.59982	3.87538	5.16038	3.04216	5.13311	5.41557	5.16623	4.46493	4.81313	4.88548	4.59609	3.48943	4.77849	3.26321	4.76395	3.8469	4.20263	4.42223	3.59417	4.33629	5.05049	4.56054	4.65385	3.74254	3.67499	3.05002	3.81979	4.42747	4.15578	4.20942	4.09827	4.89216	4.36608
LOC157381	4.08637	3.28928	3.44953	3.95132	4.34408	5.54756	3.02787	2.71364	4.35226	5.58887	5.15744	3.94441	4.1746	5.33123	4.91824	5.12161	3.40036	3.87538	4.83253	3.04216	4.6964	5.0089	1.93492	1.90676	5.00354	4.81596	4.74051	4.96633	5.36833	5.10139	5.08552	2.00993	4.10254	5.08399	4.31651	3.4973	4.72147	4.51092	4.46495	5.58487	5.56302	5.48538	4.45775	2.85306	4.15578	5.03934	4.32473	4.73622	4.74965
MTUS2	4.78251	4.6365	4.1916	4.58348	5.32926	2.81296	5.37547	3.76174	5.40368	5.11089	4.43191	4.38583	4.54577	1.89913	5.20032	4.86794	5.66288	4.73495	4.12367	3.98257	2.02528	5.0089	4.11194	5.21905	2.62465	5.24012	3.55091	5.1982	4.72434	4.01564	4.86595	4.30583	4.10254	3.98401	5.20405	3.03522	5.40675	4.13991	4.59914	4.97455	3.67499	3.51752	3.07584	4.60275	5.17439	4.32348	3.72024	3.58965	4.5977
LOC100131496	3.33731	3.28928	3.92657	1.97415	1.93233	4.52667	4.63587	1.91687	3.75112	5.06583	4.15409	3.79302	4.07535	3.92061	1.9036	3.10641	3.12583	1.89419	3.26987	3.78684	4.57012	2.09185	4.11194	4.35767	3.88359	4.62781	4.77978	3.02487	4.66224	4.60987	3.14209	4.61172	1.97841	3.78903	2.86137	4.5486	4.4214	4.56054	4.07537	3.89549	3.87268	3.79801	3.53889	3.77951	3.96772	3.12125	4.56407	3.30932	3.77426
BARX1	5.92952	5.95036	2.98693	5.62201	5.71421	2.81296	3.02787	6.2123	5.37774	6.12317	4.67585	4.24944	5.67199	5.9208	6.09387	6.03083	6.14062	6.04019	5.04997	5.45967	4.39818	6.12944	5.88146	6.17656	6.16406	5.8418	5.59186	3.77023	2.87895	4.86058	5.95709	5.21576	2.90638	5.7113	6.11697	5.32548	3.57604	3.39172	5.8751	4.28019	4.02267	5.74433	4.9782	6.05751	3.96772	5.9797	5.94318	3.78821	6.06188
PPP1R9A	5.64386	3.76773	5.55931	3.01399	4.0884	5.04146	5.36961	5.67411	5.11189	4.02474	5.67453	4.44225	3.60551	5.27063	4.87287	5.55456	5.56225	6.03761	6.0103	4.69913	4.13978	2.09185	5.85368	5.26479	4.11834	4.37271	4.74051	5.05614	5.79163	4.8414	5.3214	4.04224	5.55626	5.26733	5.9096	3.97446	3.92561	5.28337	1.93243	5.36219	5.02744	6.0182	5.24393	5.91822	5.49108	5.55385	4.43482	4.91017	5.06464
CRNN	5.28865	5.80687	6.36021	3.47352	3.61849	6.00649	5.73029	5.79758	5.96941	5.97498	6.06448	5.81773	5.62943	5.15568	6.5041	6.55487	5.72578	6.65145	6.38062	5.54419	6.17362	5.22857	5.28618	5.28252	5.59882	5.8489	3.83167	6.59864	6.23913	6.28143	5.74635	2.00993	6.06786	3.98401	5.58405	5.00315	5.42502	6.30893	6.69361	1.95988	6.1633	5.6639	5.83717	5.33812	6.32094	4.56284	6.31526	5.80914	6.65675
LOC284276	3.9665	3.28928	3.92657	5.04206	4.5591	3.51959	3.97022	3.98932	3.90389	4.41407	4.37535	4.44225	3.80398	4.63686	1.9036	4.80726	3.40036	4.55557	4.12367	3.78684	4.39818	2.09185	3.16844	3.56486	4.98556	4.43571	3.55091	4.98613	5.28774	4.53581	4.08505	4.04224	1.97841	4.60468	4.67486	3.4973	4.47164	2.9381	3.40523	3.26485	4.14201	1.929	2.00463	4.56482	4.40564	3.12125	4.09827	3.58965	4.04624
LRRN4	4.75648	4.22772	4.49978	3.75463	4.4635	4.52667	4.32696	4.15321	5.00648	5.58887	4.23867	4.61807	4.80074	2.98019	4.3805	3.10641	2.70643	4.25629	4.68374	3.04216	4.6964	2.09185	4.53461	5.29933	4.65592	5.44759	4.46645	3.77023	4.84823	3.74168	3.14209	4.75628	3.82961	3.50842	4.48486	3.97446	4.47164	2.9381	4.07537	5.81271	4.80811	3.05002	3.07584	3.58093	4.98181	3.59256	3.52065	3.58965	3.57564
TEX11	5.03381	3.76773	4.72147	1.97415	3.96802	4.25981	3.02787	4.85252	5.03269	3.44434	4.56999	1.92734	4.98755	4.54543	3.94133	4.47376	4.67023	4.18284	3.90057	4.12998	5.36812	2.09185	4.53461	3.28494	4.40689	3.99806	5.00478	4.22956	3.32862	4.53581	5.06871	4.40142	2.90638	4.65233	5.10103	3.4973	3.77455	4.13991	3.13143	3.26485	4.45722	4.25416	4.45775	4.05141	3.69169	3.12125	3.87339	3.30932	2.84807
PCSK1N	4.96178	5.53009	5.50142	1.97415	5.78353	4.48355	4.11644	4.46486	4.35226	6.1551	3.93313	5.58957	5.38516	5.21382	5.5116	4.89507	5.64815	5.42378	4.61986	5.67525	4.57012	4.89561	4.79564	5.09237	3.88359	4.49158	5.60885	3.77023	5.57292	3.89392	5.56404	3.56604	4.42429	3.50842	5.94683	3.77828	5.66874	4.80685	5.56496	5.65275	3.87268	5.50987	4.28053	5.09119	4.40564	5.1264	2.81055	4.24356	4.77438
DRD5	3.33731	5.32844	3.92657	4.52898	5.95656	1.9685	3.97022	4.67748	5.57657	2.74558	3.93313	3.79302	4.62482	3.44411	4.56339	4.47376	5.02999	4.47496	2.83132	1.96301	4.57012	2.09185	3.16844	4.71687	3.49879	4.58669	3.08578	4.84832	4.88876	4.70191	3.14209	3.8469	3.35091	4.42223	4.60833	1.97323	3.57604	3.87038	4.50226	4.61971	4.32329	4.55717	3.07584	4.3077	4.40564	4.32348	2.81055	5.12878	3.57564
TYRP1	5.24974	5.67623	4.68516	5.48981	3.81697	4.18486	5.68225	4.74441	5.08004	4.45773	4.31152	5.58074	4.95678	4.90233	4.08826	4.53998	4.95488	4.80231	4.12367	5.37508	2.02528	3.57965	5.38796	5.082	5.47097	5.42213	4.02692	5.31292	4.33387	5.23643	4.67812	4.04224	3.82961	4.34202	4.82767	1.97323	4.14547	3.87038	4.15171	4.45506	3.39408	4.65749	4.64224	5.26675	4.49546	4.06497	2.81055	4.61084	2.84807
C8orf85	4.459	3.28928	3.73054	3.01399	4.5591	3.24255	3.02787	4.3807	3.55175	5.15081	3.78158	3.94441	4.39411	4.06802	5.28447	5.0771	4.41717	4.85995	4.58416	1.96301	2.02528	2.09185	3.92144	4.22093	4.5871	4.49158	1.99235	1.93755	3.80745	3.74168	3.61807	2.00993	3.98136	3.50842	5.30431	1.97323	4.04609	4.02043	4.85497	3.54301	3.67499	1.929	4.16341	4.23514	3.21438	3.12125	3.24311	4.48606	4.23001
C6orf10	4.50883	4.22772	4.36901	4.63224	4.83753	5.44026	5.10788	4.46486	4.50808	5.10232	5.22199	5.07501	4.74987	3.72499	5.61053	4.53998	5.42737	4.4288	5.30456	5.18494	4.13978	5.30293	5.23167	4.41428	5.81174	4.54154	4.02692	4.58941	1.91666	4.20142	4.33768	2.00993	2.90638	1.93815	5.34906	5.10466	5.25222	5.74253	4.38028	4.01819	3.87268	4.25416	2.00463	5.24107	3.21438	5.01908	1.95233	4.94375	1.90037
AMAC1L2	3.33731	4.3657	2.98693	4.67623	3.3381	3.24255	3.97022	4.15321	2.83619	3.64387	1.92328	3.94441	4.25854	4.18488	3	3.10641	4.06954	3.72323	4.58416	3.04216	4.13978	2.09185	1.93492	4.41428	4.17888	1.94704	3.08578	3.02487	1.91666	3.26321	4.57048	3.10119	4.42429	3.50842	3.31352	1.97323	4.51706	2.9381	2.71501	4.01819	3.39408	3.05002	3.53889	4.05141	3.69169	1.9512	3.99637	3.78821	4.1458
CA3	3.81606	4.04178	5.25929	3.01399	4.4635	5.04895	6.26341	4.78374	6.08804	4.7089	4.50096	4.49279	3.95492	3.44411	5.33856	4.59777	4.87584	5.18744	4.40516	4.12998	3.66739	2.09185	4.25413	5.90723	5.34153	3.6764	5.50655	3.48943	4.95888	4.72866	5.2473	3.10119	4.63582	4.83364	4.92134	3.4973	5.02674	4.64607	3.98721	3.26485	4.71917	4.61014	4.84313	4.60275	6.11271	6.42176	4.81131	4.53151	4.23001
LMO3	5.20543	3.76773	5.12151	5.07449	2.88928	5.46774	4.71753	3.88603	4.71826	3.44434	4.73438	5.28416	3.80398	4.28074	4.50999	4.86794	4.91741	4.75868	3.26987	3.04216	4.13978	5.0089	4.25413	3.28494	4.7505	5.29807	3.55091	5.26497	3.80745	4.8414	4.97006	4.40142	3.63064	3.50842	4.99629	4.41758	4.22945	4.02043	4.07537	4.01819	5.02744	3.99251	5.82876	4.42747	4.7417	4.20942	3.87339	4.43573	3.57564
HABP2	1.90756	4.22772	3.90779	4.21806	4.08406	2.81296	3.79809	1.91687	4.72187	4.53459	3.30279	5.13823	4.33085	4.59347	3.46539	4.77301	3.75402	4.48587	3.88964	3.98257	4.13978	2.09185	3.16844	4.26228	4.63416	3.82478	4.38241	4.7891	3.95832	3.54254	3.14209	4.18931	1.97841	3.78903	4.70029	3.97446	5.02674	3.87038	3.40523	4.34475	4.14201	4.83766	3.07584	3.9783	4.55961	4.79418	2.86536	4.72744	3.29543
MYO16	4.55386	4.70003	3.73054	4.46744	4.0884	1.9685	4.2321	3.98932	4.28736	5.50198	3.30279	1.92734	4.33085	3.44411	4.44962	5.26561	4.87584	4.32061	1.9385	3.04216	4.94211	2.09185	3.64332	5.1401	3.49879	4.70009	4.38593	4.58941	4.7523	4.11626	4.89477	3.8469	1.97841	3.50842	4.64285	3.4973	5.06179	1.9462	3.40523	5.67724	3.87268	4.13858	4.28053	4.56482	5.34319	4.49539	4.18462	4.64575	5.31821
C22orf31	3.618	4.3657	2.98693	1.97415	4.5591	4.18486	4.2321	4.98496	4.7453	2.74558	2.8573	4.61807	3.80398	4.54543	4.50999	4.53998	4.75736	4.25629	4.65295	1.96301	2.02528	2.09185	4.60063	3.56486	4.97624	4.21709	1.99235	4.22956	3.32862	2.822	4.72322	4.18931	2.90638	4.80316	4.78285	4.41758	3.92561	3.6726	4.65385	1.95988	4.32329	4.61014	4.01569	4.80273	1.91913	3.12125	4.83658	3.93938	4.36608
KLK14	5.94887	6.01452	6.4058	3.95132	5.87672	5.16277	4.91866	4.27931	6.09543	4.94088	5.90546	5.89431	5.6257	5.26311	5.76476	5.46175	6.14022	5.3886	5.82959	5.0424	6.28508	5.59273	5.38796	6.06329	4.84113	6.21727	4.02692	6.50733	5.04426	6.14057	5.53191	3.10119	6.36833	4.88847	5.62628	4.33629	5.14093	5.9914	5.86044	3.54301	6.71962	4.42873	6.20453	4.88442	4.92694	5.65117	4.94183	4.70816	5.75745
SSTR1	3.618	1.94309	1.91915	1.97415	4.34408	2.81296	4.47548	3.40816	4.21328	3.1688	4.48257	3.79302	3.95492	3.72499	4.56339	4.94408	4.06954	4.91019	4.12367	3.98257	2.02528	2.09185	5.00345	3.91532	4.7505	3.36863	3.55091	4.96633	3.32862	4.4475	4.42858	3.8469	1.97841	5.01761	5.11095	3.03522	2.84719	3.6726	1.93243	3.26485	4.14201	5.08644	2.00463	3.58093	1.91913	4.06497	4.09827	4.05996	4.5977
MTTP	1.90756	4.22772	3.44953	3.75463	4.0884	3.24255	3.49514	3.76174	4.71826	3.44434	3.93313	5.01202	3.32509	4.80498	4.08826	1.88175	4.32503	3.52413	4.45659	3.50591	2.02528	5.09707	4.8985	4.29385	4.47504	2.91775	3.08578	1.93755	4.2616	3.54254	4.62763	4.04224	2.90638	4.6953	4.06248	3.03522	4.04609	1.9462	4.46495	1.95988	2.93985	4.34892	2.00463	4.80273	3.96772	4.20942	4.43482	4.24356	3.77426
SLC24A2	4.18513	5.3064	3.73054	4.52898	4.0884	4.18486	5.15746	4.78374	4.12747	3.44434	3.30279	4.77044	4.72189	4.06802	4.50999	4.30479	4.32503	2.80323	3.74808	4.60769	3.66739	2.09185	4.83293	4.89204	5.179	4.62781	5.30589	4.22956	3.32862	4.33927	3.89542	4.04224	2.90638	3.04222	1.88259	3.77828	4.66341	2.9381	4.38028	4.45506	2.93985	3.05002	2.00463	4.67012	3.96772	3.87218	4.38278	4.91017	1.90037
DBH	3.618	3.28928	3.44953	1.97415	1.93233	3.71919	4.58843	3.40816	1.95319	4.56877	2.8573	1.92734	4.39411	4.77636	4.72938	4.3966	4.2718	4.68308	3.26987	4.12998	2.02528	2.09185	3.92144	4.29385	4.40689	3.99806	3.08578	4.32529	3.60908	5.03729	4.92159	2.00993	2.90638	3.98401	4.64285	4.83523	4.74774	3.6726	3.60463	3.54301	3.67499	4.49728	2.00463	3.93078	3.96772	3.87218	4.43482	5.09871	4.63268
?|388795	5.33396	1.94309	3.44953	1.97415	3.96802	3.51959	3.02787	3.76174	1.95319	4.3133	3.78158	5.6788	2.87605	4.06802	4.72938	3.58086	4.06954	3.24469	4.85284	3.04216	2.02528	4.74055	3.16844	3.56486	4.81313	4.62781	3.08578	3.77023	2.87895	3.54254	4.42858	2.00993	4.10254	3.78903	4.06248	3.03522	4.30188	4.23828	1.93243	3.26485	2.93985	3.51752	3.07584	2.85306	1.91913	3.12125	1.95233	4.37947	3.92554
COLEC10	4.18513	4.70003	2.98693	4.39697	2.88928	3.24255	1.91018	4.93736	4.12747	2.74558	3.78158	4.68564	1.91747	4.18488	4.50999	4.04994	4.84539	3.24469	4.45659	3.78684	4.39818	2.09185	4.36611	2.83973	4.11834	3.36863	3.08578	5.08667	4.17783	3.26321	4.92159	4.04224	2.90638	3.98401	3.59417	3.03522	5.14093	3.6726	3.13143	1.95988	4.45722	4.49728	4.16341	4.3712	3.96772	4.06497	4.25929	2.86145	4.5977
FLJ16779	3.81606	4.84805	3.44953	4.92338	5.01565	4.25981	5.38121	3.76174	5.2086	6.19608	3.78158	4.53847	4.80074	4.49176	4.61117	4.77301	4.67023	3.99712	5.0128	3.04216	2.02528	2.09185	4.45767	5.12182	5.26218	4.92586	1.99235	4.53581	3.95832	1.91419	3.61807	2.00993	4.92248	4.65233	3.31352	3.03522	5.03881	1.9462	4.65385	2.8303	5.2617	3.05002	3.53889	4.23514	3.21438	4.76226	2.81055	5.50137	3.92554
RGS13	5.15418	4.98626	4.602	1.97415	3.96802	2.81296	4.32696	4.3807	4.02626	2.74558	4.15409	4.38583	1.91747	4.28074	4.56339	4.9204	1.91133	4.18284	4.45659	3.50591	2.02528	2.09185	4.45767	4.46493	4.2826	3.36863	3.08578	4.47524	3.95832	4.60987	4.9466	3.10119	3.63064	4.80316	4.67486	4.12249	4.4214	3.39172	3.60463	3.89549	4.39477	3.51752	3.53889	4.52342	4.57086	1.9512	5.17381	5.77704	5.83256
CDK15	5.19742	4.88746	2.98693	3.01399	4.63822	4.18486	5.30384	3.13336	4.40984	3.44434	1.92328	4.44225	4.45018	1.89913	3.94133	4.64881	3.75402	4.37771	3.54873	3.50591	2.02528	2.09185	4.25413	4.65831	5.19445	3.64917	3.83167	4.40592	3.32862	3.89392	4.08505	3.56604	1.97841	3.04222	4.06248	1.97323	4.22945	2.9381	3.40523	3.54301	3.39408	3.51752	2.00463	3.93078	3.21438	4.20942	4.4819	4.61084	3.29543
PPFIA2	4.18513	4.98626	4.72147	1.97415	4.18777	2.81296	4.96116	4.91109	3.27328	3.44434	2.8573	4.32213	4.84597	4.59347	4.56339	4.47376	5.15843	3.99712	2.83132	3.50591	2.02528	2.09185	5.23167	4.90936	4.81313	4.11812	4.59609	3.77023	3.32862	4.4475	4.86595	3.56604	3.63064	4.80316	3.94271	3.97446	5.02674	1.9462	4.78575	3.74254	3.67499	4.77463	2.00463	4.47784	1.91913	3.59256	4.52478	3.78821	2.84807
SERPINC1	3.618	4.3657	2.98693	3.47352	4.18777	2.81296	4.47548	3.76174	4.12747	3.79783	2.8573	4.24944	2.87605	2.98019	3	3.58086	3.98165	3.52413	4.0227	3.78684	2.02528	2.09185	4.45767	3.76371	3.97281	3.36863	4.53565	4.40592	4.2616	4.11626	3.14209	2.00993	3.63064	3.04222	3.31352	4.12249	3.29573	3.87038	3.13143	1.95988	5.14298	3.51752	3.53889	4.15098	3.96772	1.9512	2.81055	4.64575	3.77426
WDR93	4.40331	4.3657	2.98693	4.46744	4.5591	3.24255	3.77562	4.33252	1.95319	4.1879	3.30279	4.90062	3.80398	3.92061	4.56339	4.59777	4.529	3.52413	4.45659	3.98257	2.02528	5.65662	3.64332	4.03637	4.85439	1.94704	1.99235	3.48943	4.33387	4.39636	3.89542	3.10119	4.10254	3.78903	5.08033	3.03522	4.94437	4.32138	3.98721	3.54301	3.87268	3.79801	3.53889	4.67012	1.91913	3.12125	3.99637	3.58965	4.51832
SLED1	2.88546	1.94309	4.55375	3.01399	4.4635	4.25981	3.97022	1.91687	2.83619	1.93246	1.92328	1.92734	3.60551	3.72499	3.74614	3.58086	4.37322	3.72323	3.90057	3.04216	5.25779	5.22857	3.64332	1.90676	1.89017	3.99806	1.99235	3.02487	2.87895	4.60987	4.80091	3.8469	3.35091	3.50842	2.86137	3.4973	2.84719	4.02043	4.33188	3.74254	4.02267	1.929	4.37669	3.30059	3.69169	3.59256	3.99637	2.86145	1.90037
CNTN3	5.29467	5.62467	4.36901	3.01399	4.73535	3.71919	5.03384	3.40816	4.28736	2.74558	4.23867	5.20767	5.44894	4.88017	4.3805	4.73563	4.06954	5.18296	3.74808	3.78684	2.02528	2.09185	5.73054	5.43015	5.06758	4.58669	3.55091	5.05614	4.82631	5.02542	4.92159	3.56604	2.90638	4.97929	4.52986	4.23987	4.59623	4.23828	5.21976	3.74254	4.71917	4.25416	3.53889	4.63772	4.57086	3.12125	5.0366	5.21316	5.0416
SFTPA2	2.88546	4.22772	1.91915	4.21806	3.81697	2.81296	3.49514	1.91687	5.29558	4.65807	3.58274	3.79302	4.25854	3.44411	3	3.58086	4.14564	5.1605	4.0227	4.12998	3.66739	2.09185	3.64332	3.28494	5.67896	3.99806	3.55091	5.63998	4.5032	5.65477	4.72322	3.10119	3.63064	4.13066	3.59417	3.03522	5.53258	3.39172	4.67883	5.91708	3.67499	4.13858	3.53889	3.93078	3.21438	3.12125	2.81055	3.58965	3.29543
BCMO1	4.83002	5.42764	5.75692	3.47352	5.4519	5.80533	4.96116	4.3807	5.08004	3.1688	5.51869	4.58003	5.36682	5.16612	3.94133	4.64881	4.91741	5.01829	5.24372	4.77472	2.02528	4.74055	3.64332	3.28494	3.6535	6.06882	3.55091	4.22956	4.62745	5.58147	5.03245	4.55125	5.32071	4.2468	5.52388	4.86403	4.04609	4.94172	5.77304	4.40322	5.45134	5.02047	5.23277	4.63772	3.69169	5.26421	5.68549	4.98913	3.29543
RTDR1	4.34041	5.16552	4.07439	3.47352	2.88928	5.25901	4.58843	4.74441	4.8592	3.79783	5.18312	5.71465	3.32509	5.1223	4.61117	4.59777	4.61898	4.99409	5.46795	4.4237	2.02528	2.09185	3.92144	1.90676	5.23676	4.86363	4.1739	3.48943	4.72434	5.14703	4.62763	3.8469	3.98136	4.77019	4.24464	3.4973	3.92561	4.32138	4.94038	3.26485	4.02267	4.34892	4.9782	4.86553	3.96772	5.36081	4.18462	3.93938	4.66505
C2orf50	4.18513	3.76773	4.55375	4.67623	4.18777	4.25981	1.91018	3.88603	1.95319	4.25433	3.93313	3.31415	1.91747	4.36154	3	4.04994	3.87835	4.51703	3.54873	1.96301	2.02528	2.09185	1.93492	3.56486	4.17888	4.84052	3.08578	3.02487	4.17783	4.53581	1.88593	3.10119	1.97841	3.04222	3.94271	1.97323	3.92561	4.02043	4.07537	3.89549	4.56215	1.929	4.16341	4.75464	3.21438	1.9512	3.24311	4.24356	3.92554
C6orf15	4.55386	6.1913	5.76997	4.71628	6.11089	5.7239	5.64568	4.50198	4.91474	4.41407	3.58274	6.37294	5.72927	6.46443	5.45085	6.00119	5.95217	5.21074	5.19316	6.50619	6.49142	5.69029	6.20673	5.27673	3.77894	4.97946	3.08578	6.06922	5.53337	3.54254	5.43239	3.56604	5.84755	5.50603	6.09458	4.5486	4.72147	4.60531	5.91282	4.78997	6.23689	4.25416	4.9782	5.73193	3.96772	6.30356	5.25921	5.16512	6.08547
PRG4	4.81006	5.74464	4.27631	4.56137	4.73477	4.32802	5.26559	4.9599	5.22555	4.11706	4.73495	5.65737	5.42049	4.41459	5.2209	5.44405	5.55093	5.44097	3.75145	4.55507	3.70777	2.09185	4.75634	5.71825	4.53647	4.61706	5.11539	6.6817	4.0862	4.34169	5.47332	3.82829	4.66053	5.30073	4.97046	3.9828	5.00236	4.39489	3.88923	4.81583	5.21528	4.35064	4.18261	4.75568	5.71319	5.36915	5.38312	5.68703	5.09955
FOXD3	5.50504	4.47396	5.08294	5.07449	4.97038	4.87873	3.97022	5.09899	3.27328	4.97934	5.47745	4.49279	4.39411	3.72499	5.01232	5.24725	5.02999	4.7098	3.90057	4.86739	4.57012	2.09185	5.18038	3.76371	5.347	4.73217	4.64953	1.93755	3.32862	4.64276	5.28799	3.8469	5.25791	5.365	4.31651	5.0574	4.74774	5.48243	4.67883	4.01819	5.69475	5.42904	5.80793	5.21315	4.63551	4.49539	5.2948	2.86145	4.36608
SERPIND1	1.90756	3.76773	4.36901	1.97415	2.88928	3.99593	3.02787	3.13336	3.75112	4.45773	4.90951	4.24944	3.60551	3.44411	3.46539	3.58086	3.40036	5.78992	2.83132	3.50591	4.13978	4.50447	3.16844	4.55237	4.84113	1.94704	3.08578	4.89991	3.60908	3.74168	4.08505	4.92377	2.90638	3.04222	4.16123	1.97323	4.22945	3.87038	3.88357	3.74254	5.53047	4.42873	2.00463	3.77951	4.29564	3.87218	3.24311	4.05996	3.29543
GRP	2.88546	5.99783	4.64555	5.04206	5.71421	1.9685	5.85952	5.58247	4.46142	4.79533	4.52834	5.92629	4.97249	5.4204	5.63095	4.04994	5.4996	4.68308	5.09425	3.04216	4.39818	5.86886	5.57722	5.43015	5.84591	5.11684	5.50189	3.77023	4.6944	4.39636	4.57048	2.00993	5.36778	5.6393	3.31352	5.7281	5.14093	1.9462	5.49212	5.61998	3.87268	5.5251	3.07584	5.10152	1.91913	4.83533	5.27151	4.76255	4.04624
CNGA4	4.08637	3.76773	1.91915	3.47352	3.3381	1.9685	3.02787	4.21998	4.12747	3.44434	2.8573	4.0653	3.60551	4.88017	3.46539	4.1925	3.87835	3.72323	3.74808	3.04216	2.02528	2.09185	3.64332	1.90676	4.40689	3.99806	1.99235	3.02487	4.86903	4.92911	3.14209	3.8469	1.97841	1.93815	4.16123	1.97323	4.30188	2.9381	3.13143	3.26485	3.87268	3.05002	2.00463	5.04655	3.69169	4.32348	3.72024	3.93938	4.77438
MAP7D2	6.24744	6.01958	3.73054	4.78669	5.01565	5.97433	4.71753	5.88958	5.77537	5.22495	2.8573	5.92684	5.6257	6.01785	5.65189	5.8029	6.2276	6.05737	6.24242	5.91273	4.13978	5.73148	5.81783	5.43015	5.37356	5.98772	4.69736	3.77023	4.7523	6.29434	6.09541	6.08037	4.78415	6.18121	5.81688	3.77828	5.38321	3.87038	6.13367	5.28149	3.39408	5.86486	4.01569	5.66483	4.63551	5.64289	5.64852	4.31603	4.93113
EGOT	3.9665	3.28928	4.36901	4.8741	3.61849	4.63634	1.91018	2.71364	4.46142	4.77536	4.52834	4.38583	3.95492	2.98019	3.94133	3.10641	3.12583	4.37771	5.23696	1.96301	4.57012	4.05762	3.64332	3.56486	4.53449	4.84052	1.99235	3.96569	4.2616	4.57434	4.22638	4.04224	2.90638	3.04222	3.31352	3.03522	3.92561	4.64607	3.13143	3.74254	3.87268	4.34892	4.45775	3.30059	3.96772	3.12125	3.24311	4.15945	3.92554
GLT25D2	5.90069	6.14889	4.95337	6.0069	4.4635	4.09811	5.81489	6.32026	5.19296	4.73225	5.00308	5.74242	4.86678	5.80696	5.72619	5.87535	6.38318	6.12039	4.68374	6.19761	4.79493	5.53357	6.22597	5.3761	6.09669	4.84052	4.87941	5.66908	4.82631	5.13838	6.183	3.56604	4.85917	5.23979	6.0952	5.49717	5.69062	4.02043	6.16941	4.61971	3.87268	5.5964	5.96575	6.19449	5.3839	5.48327	5.57022	4.67809	5.1777
SYT14	4.7287	5.51348	4.4388	5.24378	4.34408	1.9685	4.40684	5.80178	4.71826	4.60054	5.41377	5.34575	4.88652	5.18604	5.31939	5.55128	4.8609	5.8495	5.16038	5.88957	4.79493	2.09185	5.18038	3.91532	5.75546	5.27038	4.74051	3.77023	5.54122	2.822	4.9466	3.8469	1.97841	4.42223	5.75849	5.50573	4.59623	4.32138	4.7025	4.71318	4.32329	5.91469	2.00463	5.47653	4.63551	3.12125	4.25929	3.30932	3.92554
C19orf18	4.26854	1.94309	4.36901	3.75463	1.93233	4.7977	3.77562	3.76174	4.21328	4.02474	4.05421	3.79302	1.91747	3.44411	5.19057	4.30479	3.75402	3.87538	4.68374	4.24687	5.04953	3.57965	3.64332	4.51069	4.73323	2.91775	4.29036	3.48943	4.66224	4.27495	4.42858	4.40142	4.88141	4.60468	4.37931	1.97323	3.29573	4.32138	4.21878	2.8303	4.60686	4.42873	3.81979	3.77951	4.63551	3.87218	3.24311	3.30932	4.7233
FAM150B	4.40331	3.76773	4.602	5.13177	2.88928	4.48355	3.02787	4.42459	4.21328	4.36622	4.31152	4.93594	3.60551	4.28074	4.97752	4.80726	4.32503	3.87538	4.54537	5.59423	4.99952	3.57965	4.25413	4.29385	5.32791	4.49158	1.99235	1.93755	4.45306	3.74168	4.42858	4.04224	4.57758	5.18799	5.12058	3.97446	3.29573	4.99486	4.9651	2.8303	4.39477	5.55983	4.9782	4.56482	3.96772	4.67375	5.20478	3.78821	5.0416
ST18	4.26854	1.94309	1.91915	4.75294	1.93233	1.9685	4.2321	5.13742	4.21328	2.74558	4.37535	4.0653	3.32509	4.06802	4.30003	4.3966	4.61898	4.25629	4.78858	3.98257	2.02528	2.09185	4.92758	5.07129	4.17888	1.94704	4.1739	3.77023	4.45306	4.49371	4.57048	3.10119	3.98136	4.80316	4.48486	4.41758	1.89203	2.9381	3.13143	3.26485	4.14201	4.91676	3.53889	4.47784	4.29564	3.59256	3.87339	4.61084	4.77438
ROPN1L	4.459	4.47396	2.98693	4.92338	4.6004	3.99593	3.49514	4.8196	3.75112	4.41407	4.48257	4.0653	4.45018	5.38174	3.46539	4.47376	3.12583	4.62394	4.40516	3.50591	4.39818	2.09185	3.16844	3.91532	3.88359	3.64917	4.64953	3.77023	5.36357	5.48314	3.14209	4.30583	3.35091	4.13066	4.78285	3.03522	5.03881	3.39172	3.13143	4.95955	3.67499	3.51752	3.07584	5.33319	4.7417	3.12125	3.24311	4.67809	5.36579
PKD1L2	3.81606	5.25709	4.9723	4.67623	5.19121	4.63634	4.53545	4.15321	3.27328	5.30009	4.56999	4.53847	4.1746	5.22258	3.74614	4.86794	4.81247	4.51703	4.90818	3.98257	4.13978	2.09185	4.75462	3.91532	3.77894	5.06796	3.08578	3.77023	3.32862	3.89392	5.38533	3.8469	3.63064	1.93815	4.99629	3.03522	4.4214	5.53025	4.8042	4.95955	4.39477	3.99251	2.00463	5.36618	4.15578	5.14153	5.04836	4.05996	3.92554
SLC22A16	2.88546	4.04178	4.49978	3.75463	1.93233	1.9685	4.40684	3.13336	3.90389	3.64387	3.30279	3.59428	4.07535	3.92061	4.6935	4.47376	4.21245	3.87538	4.58416	3.04216	4.87504	4.89561	5.31492	4.59055	3.49879	3.84738	4.1739	3.02487	5.66024	4.39636	4.22638	3.10119	3.35091	5.44394	4.52986	3.77828	3.29573	3.6726	3.88357	3.54301	3.39408	3.79801	2.00463	3.93078	5.28594	1.9512	4.09827	3.58965	4.51832
KIR2DL4	3.33731	3.76773	5.28991	4.39697	5.05593	4.25981	5.33848	4.99596	4.12747	3.44434	4.56999	4.32213	5.3422	5.25541	5.41956	4.3966	4.67023	5.11043	3.54873	4.49323	4.57012	3.57965	1.93492	3.28494	3.49879	4.70009	5.28719	3.77023	4.58971	4.87888	5.33683	3.8469	3.82961	4.93656	4.31651	5.43965	5.1745	5.34212	3.40523	3.89549	4.02267	3.51752	5.26522	5.27285	4.15578	4.62168	4.77139	4.67809	4.77438
PRH2	4.9923	4.04178	6.14046	4.21806	4.18777	3.99593	4.11644	5.09899	4.35226	4.02474	6.50696	5.43706	5.15983	5.91457	5.51498	4.30479	4.90402	6.055	5.16889	5.0424	4.39818	2.09185	3.92144	3.91532	4.36883	3.64917	4.64953	3.02487	6.16981	4.27495	4.80091	3.10119	4.36036	3.78903	4.48486	4.5486	4.47164	5.05566	4.15171	5.9256	4.32329	4.13858	4.37669	6.62164	4.82633	4.67375	3.87339	4.05996	4.47277
MNX1	5.12529	4.22772	3.73054	5.42212	5.13525	4.48355	3.77562	3.98932	3.27328	5.01421	4.37535	4.9834	4.58704	2.98019	3.94133	4.3966	4.67023	4.09764	4.54537	3.78684	2.02528	4.95615	4.75462	3.76371	3.77894	4.58669	4.38593	1.93755	4.2616	5.02542	5.208	3.8469	5.06706	3.04222	5.48357	4.12249	4.95946	4.71779	4.7025	4.71318	5.32423	3.05002	5.41841	4.60275	4.40564	3.12125	3.52065	3.58965	1.90037
IL13RA2	4.18513	5.01416	5.37817	5.60534	3.81697	1.9685	5.64127	5.14461	3.75112	4.3133	5.09934	5.61635	5.08973	4.59347	4.61117	5.19604	4.529	5.28728	4.0227	4.98576	2.02528	3.57965	4.65821	5.73987	5.37356	4.94459	4.95934	5.31292	4.88876	4.20142	4.08505	5.33108	3.98136	5.365	4.75841	4.60266	5.25222	4.90166	5.02054	4.01819	5.45949	4.42873	4.52748	3.30059	5.36014	3.12125	4.18462	4.24356	4.30254
ANO3	3.618	3.76773	2.98693	1.97415	3.61849	5.33341	4.53545	4.42459	5.17652	3.44434	3.58274	3.59428	4.1746	3.44411	4.84797	3.85914	4.56103	4.68308	3.54873	3.78684	2.02528	2.09185	3.64332	4.22093	4.05025	4.49158	3.08578	4.11291	3.80745	3.26321	4.50496	4.30583	4.53172	4.6953	4.67486	1.97323	4.51706	5.19307	3.13143	5.53681	5.78131	1.929	3.07584	3.93078	3.96772	3.59256	1.95233	3.30932	3.29543
DIO1	4.08637	1.94309	4.28787	3.75463	2.88928	5.74834	3.02787	3.76174	3.27328	2.74558	4.56999	1.92734	2.87605	2.98019	3.74614	3.10641	3.12583	3.24469	5.45139	1.96301	2.02528	2.09185	3.16844	4.29385	3.88359	3.84738	3.08578	3.48943	3.60908	5.01311	4.08505	4.04224	4.75582	3.50842	2.86137	3.4973	3.29573	4.13991	3.13143	3.74254	4.64757	1.929	4.64224	4.42747	3.21438	3.12125	3.52065	3.30932	4.23001
ENPP3	5.23565	4.3657	4.4388	3.95132	1.93233	3.24255	4.11644	4.62629	1.95319	3.1688	4.60814	5.64244	2.87605	5.4813	4.30003	4.53998	3.75402	4.96818	4.50308	3.98257	2.02528	2.09185	4.11194	3.76371	4.73323	3.99806	3.83167	5.16492	5.68683	4.33927	4.62763	2.00993	4.69285	4.34202	4.78285	3.03522	4.85831	4.39294	3.88357	5.09849	4.51261	4.70021	4.58834	5.55798	4.82633	3.12125	4.09827	4.48606	4.63268
GRIN3B	5.47164	4.62822	4.35612	5.91893	5.61652	5.33902	5.41931	4.96887	2.83619	6.07724	3.93313	5.37002	5.42503	4.93647	4.73892	4.6074	4.56627	3.59232	3.26987	4.24687	5.47453	4.325	4.25413	5.46034	4.50926	4.19491	4.64953	4.54261	5.43781	4.76299	3.89319	5.45239	2.90638	4.5497	4.8551	4.33629	5.16551	5.4763	3.43446	4.44055	4.02	4.42802	4.95435	5.29859	5.2903	5.16688	3.72024	3.97568	4.82131
GLP1R	2.88546	3.28928	3.44953	3.01399	2.88928	3.24255	4.11644	4.27931	3.75112	3.64387	4.43191	3.94441	4.25854	4.54543	4.08826	4.47376	3.98165	4.09764	2.83132	4.12998	2.02528	2.09185	3.92144	4.65831	3.6535	2.91775	3.83167	4.8198	1.91666	4.20142	3.61807	4.18931	4.10254	4.73441	5.0583	1.97323	4.72147	2.9381	3.60463	2.8303	2.93985	3.05002	2.00463	3.93078	4.15578	1.9512	4.63382	4.05996	2.84807
C2orf82	3.618	3.28928	3.44953	3.01399	4.34408	3.24255	1.91018	3.13336	1.95319	3.64387	1.92328	3.79302	1.91747	3.44411	3.46539	1.88175	3.87835	1.89419	4.50308	3.04216	4.87504	4.325	3.16844	2.83973	3.77894	3.64917	3.83167	3.02487	3.32862	2.822	4.42858	2.00993	1.97841	1.93815	4.16123	3.03522	4.22945	4.13991	2.71501	3.89549	1.94433	3.51752	3.07584	1.90476	3.21438	3.12125	3.87339	2.86145	3.92554
UPK1A	3.9665	3.76773	4.49978	4.1	3.61849	5.08642	3.77562	4.93533	4.35226	5.37628	4.78575	4.95244	3.95492	5.32504	4.87287	4.96636	3.12583	5.24836	4.58416	4.9191	4.87504	2.09185	4.36611	4.03637	4.5616	4.97946	4.02692	6.5617	2.87895	5.36776	4.67812	4.18931	3.63064	4.34202	4.57081	3.77828	4.91525	4.45549	5.14814	1.95988	4.71917	5.03813	5.68684	3.77951	1.91913	3.59256	3.24311	4.21722	5.61736
EFHB	3.81606	4.75542	4.4388	3.01399	4.76336	5.01659	4.11644	4.62629	1.95319	3.44434	4.73438	3.79302	4.50041	4.96194	4.2046	4.69445	4.89018	5.11043	5.25682	3.50591	3.66739	2.09185	4.11194	4.46493	4.5871	5.09324	1.99235	4.22956	5.01794	4.98715	4.50496	3.56604	2.90638	3.98401	4.75841	3.97446	4.94437	1.9462	4.50226	4.20586	1.94433	4.42873	4.28053	5.1662	4.63551	3.87218	3.72024	3.93938	4.91465
KRT32	5.03381	3.28928	3.73054	3.47352	4.2717	3.87261	1.91018	3.13336	4.7453	4.49772	5.48059	5.10806	1.91747	4.80498	3.94133	4.73563	4.529	4.47496	4.83253	4.60769	4.57012	2.09185	3.16844	5.43713	5.5508	2.91775	4.87941	4.40592	4.62745	4.33927	4.42858	2.00993	3.35091	5.28448	3.94271	4.23987	4.72147	3.6726	4.97686	4.40322	4.71917	5.35924	4.80975	4.63772	1.91913	4.67375	2.81055	2.86145	4.63268
SLC6A13	2.88546	3.28928	3.92657	3.75463	3.61849	3.87261	3.49514	3.60751	3.75112	4.45773	2.8573	4.0653	1.91747	3.72499	4.44962	3.58086	3.75402	3.87538	2.83132	1.96301	2.02528	2.09185	1.93492	4.87393	4.44216	1.94704	3.83167	3.48943	3.32862	3.54254	5.06871	2.00993	3.82961	1.93815	3.31352	3.97446	4.92864	2.9381	3.13143	2.8303	4.02267	3.51752	4.84313	3.58093	4.40564	3.12125	3.24311	1.91031	3.57564
LRP2	5.13521	4.84805	2.98693	4.92338	4.88033	3.51959	3.49514	4.56837	1.95319	4.95416	3.93313	5.12847	4.39411	4.28074	4.76242	4.64881	3.75402	4.68308	3.26987	4.4237	3.66739	5.48653	4.75462	4.51069	4.94672	4.54154	4.1739	3.48943	4.62745	4.57434	5.13151	3.8469	3.82961	3.04222	5.40376	3.4973	4.79568	2.9381	4.42444	3.54301	4.24029	5.11531	4.77355	5.19051	4.40564	4.06497	4.60029	3.30932	1.90037
DKKL1	5.10458	4.75542	3.44953	4.21806	5.59915	1.9685	4.2321	5.03696	4.28736	4.25433	4.15409	5.39271	4.33085	3.92061	4.44962	4.73563	3.87835	4.65449	4.45659	4.12998	2.02528	2.09185	3.16844	3.91532	5.06016	4.21709	4.02692	4.11291	2.87895	1.91419	5.01283	4.61172	2.90638	4.97929	3.31352	3.03522	3.57604	4.85705	4.74616	2.8303	2.93985	4.25416	3.81979	4.47784	3.21438	4.89726	3.52065	4.70816	3.77426
HMSD	5.5699	4.98626	4.68516	1.97415	3.96802	5.42549	3.77562	4.8364	4.97829	3.64387	3.30279	4.74402	4.54577	4.18488	5.38977	4.64881	4.56103	5.1605	5.4073	4.80795	2.02528	2.09185	4.8985	3.56486	5.64779	4.84052	3.55091	3.48943	4.17783	5.51055	5.22996	4.30583	5.45305	5.75976	4.73239	3.4973	3.77455	5.49336	5.17644	4.45506	4.7805	3.05002	5.70373	4.60275	3.21438	3.59256	4.87487	5.01653	4.81978
FAM129C	2.88546	3.28928	4.07439	3.75463	1.93233	4.32554	4.53545	4.15321	3.90389	3.44434	5.294	3.94441	4.39411	4.49176	4.30003	5.0439	4.41717	4.68308	2.83132	4.83875	4.6964	2.09185	3.16844	3.91532	4.40689	3.36863	3.83167	3.02487	3.95832	5.02542	5.33683	2.00993	1.97841	4.42223	4.90435	3.03522	4.6311	4.13991	3.88357	4.87433	4.14201	4.70021	3.07584	4.98149	4.57086	3.12125	4.94183	6.07139	5.9428
UCN	4.55386	3.28928	4.28787	3.75463	5.04299	4.8967	3.77562	3.76174	1.95319	4.1879	3.78158	4.32213	1.91747	4.49176	4.3805	1.88175	3.98165	1.89419	1.9385	3.04216	5.16865	5.41557	3.64332	3.28494	4.47504	3.36863	4.02692	3.02487	3.32862	4.20142	4.83479	3.8469	4.20263	3.50842	3.31352	3.03522	4.14547	3.87038	2.71501	4.50189	4.45722	3.99251	4.58834	2.85306	4.15578	3.12125	1.95233	4.61084	3.92554
HES7	4.55386	4.04178	4.72147	3.01399	4.34408	3.87261	3.49514	3.40816	4.02626	5.50681	4.56999	4.58003	4.50041	3.72499	5.07324	3.58086	3.12583	3.87538	4.12367	3.78684	5.36812	3.57965	3.92144	2.83973	3.88359	4.11812	5.08195	3.02487	3.60908	1.91419	4.22638	5.84041	4.88141	3.98401	3.31352	4.77075	3.77455	4.88	3.40523	2.8303	4.75095	1.929	5.02144	4.42747	4.15578	4.20942	3.87339	2.86145	4.66505
CHRDL2	5.4931	5.06437	5.26722	3.75463	4.4635	3.99593	5.70744	5.52939	5.79842	3.92182	5.79719	5.43706	4.77609	5.41582	4.65429	5.80883	4.71604	5.83993	4.54537	4.89408	2.02528	2.09185	4.70912	5.72867	3.77894	3.84738	5.30589	5.86385	5.35383	5.66374	5.67691	4.97529	4.36036	4.6953	5.59192	4.23987	5.27051	5.24539	4.42444	5.21371	4.68483	3.79801	3.81979	5.62045	6.11199	6.01553	5.14859	5.0541	5.81254
CYP8B1	3.618	3.76773	4.07439	3.01399	1.93233	4.43625	3.49514	1.91687	4.12747	3.64387	3.30279	2.8677	4.25854	3.92061	3.46539	3.58086	3.59982	4.37771	4.45659	1.96301	2.02528	3.57965	1.93492	3.28494	3.49879	3.64917	1.99235	4.40592	4.5485	3.74168	4.42858	3.8469	3.63064	3.78903	3.79225	1.97323	3.92561	3.87038	1.93243	3.74254	4.90277	3.51752	2.00463	3.58093	4.29564	1.9512	1.95233	4.31603	4.1458
NRADDP	4.7287	3.28928	4.1916	1.97415	4.34408	4.38393	3.77562	3.88603	2.83619	3.44434	3.58274	1.92734	4.1746	4.06802	4.30003	4.04994	4.21245	3.87538	2.83132	1.96301	4.79493	2.09185	3.64332	3.91532	4.53449	3.64917	3.08578	4.22956	4.2616	4.33927	4.62763	3.10119	2.90638	4.42223	3.59417	4.12249	3.29573	4.39294	3.75895	1.95988	4.56215	3.05002	3.81979	3.58093	4.29564	3.12125	2.81055	1.91031	3.77426
TRIM61	3.81606	4.22772	4.07439	1.97415	3.96802	3.24255	4.84447	3.88603	3.75112	2.74558	3.78158	4.0653	4.39411	4.06802	3	4.69445	3.87835	4.4288	3.74808	1.96301	2.02528	2.09185	4.70912	4.51069	4.53449	3.36863	4.1739	3.96569	2.87895	3.26321	4.33768	4.18931	3.35091	3.50842	4.06248	1.97323	2.84719	1.9462	3.60463	4.01819	5.15376	3.51752	3.07584	3.93078	1.91913	1.9512	3.52065	4.81057	4.5977
GCKR	3.618	3.76773	3.92657	1.97415	3.96802	5.26539	3.49514	3.88603	4.02626	2.74558	4.05421	3.59428	2.87605	4.28074	4.44962	3.10641	3.40036	3.24469	2.83132	3.04216	2.02528	2.09185	3.16844	3.28494	4.2826	4.11812	3.08578	3.77023	4.17783	3.26321	3.14209	4.40142	1.97841	3.04222	3.31352	3.03522	3.92561	4.64607	3.75895	3.74254	4.68483	1.929	4.01569	2.85306	4.40564	3.87218	3.24311	3.78821	4.30254
PIGR	4.69896	5.88581	6.52902	5.02468	3.96802	6.31136	4.32696	6.57386	5.38663	5.69288	6.61154	4.8408	5.51562	6.55978	6.33402	6.28158	6.16247	6.782	6.52774	6.25477	6.15501	5.36399	4.53461	5.84591	4.90335	4.11812	4.46645	6.66693	6.74505	6.332	5.90691	5.3221	6.54021	5.03539	6.37361	6.55134	6.14609	6.63618	4.46495	6.5915	6.35896	5.82165	6.46141	6.81488	6.50526	4.97491	4.52478	4.70816	6.00131
FABP4	5.48691	6.32256	4.81454	5.47655	6.01297	5.38504	5.64568	5.37115	6.0799	6.89779	5.12961	6.5538	6.23795	5.21382	5.31269	6.2658	4.81247	5.90113	4.28311	5.83957	5.40349	7.47819	6.02015	6.53559	5.11535	6.28375	5.14567	6.46227	6.14026	4.79996	5.67907	5.04161	4.94155	4.73441	5.21847	4.73439	6.43719	5.31734	5.35116	6.16207	5.84776	4.86582	5.79356	5.61133	5.96508	5.31179	5.26543	6.41505	5.76149
SPESP1	4.80697	5.96737	5.94094	5.99337	3.8834	4.43625	5.10788	4.65265	4.58946	3.92182	3.93313	5.99728	5.08973	4.63517	5.99638	5.63075	4.75736	4.42685	5.14274	4.12998	3.66739	4.50447	5.41552	5.62664	5.94452	5.95583	5.37872	5.7933	5.08038	5.93165	4.67812	5.78065	4.41644	4.60468	4.78285	5.81758	4.51706	3.39172	6.03057	4.71318	4.02267	5.70639	4.28053	4.69994	5.12502	4.20942	5.99886	4.76255	5.2856
ACCN1	4.50883	3.28928	3.92657	3.01399	3.61849	5.37626	5.30384	3.60751	3.90389	4.68423	4.15409	5.1184	4.39411	4.18488	1.9036	4.30479	4.61898	3.72323	2.83132	3.78684	4.13978	2.09185	1.93492	2.83973	3.02964	3.36863	4.53565	4.47524	4.5485	3.89392	5.08552	2.00993	2.90638	4.34202	3.94271	3.4973	4.36524	3.6726	5.60874	4.34536	3.87268	3.05002	2.00463	3.58093	3.69169	3.59256	2.81055	3.58965	4.23001
LOC100128239	4.08637	4.88746	4.36901	4.8995	5.10341	2.81296	4.8708	2.71364	4.89708	5.00296	2.8573	2.8677	4.07535	3.44411	3.46539	4.77301	3.59982	2.80323	1.9385	3.04216	4.13978	2.09185	4.25413	4.41428	4.71518	5.23209	3.83167	4.7891	5.05671	2.822	3.89542	3.10119	3.82961	4.49121	4.82767	3.77828	4.59623	3.39172	4.72491	4.85483	4.60686	3.05002	3.53889	4.3077	4.49546	3.12125	3.72024	4.73622	4.30254
CHRNB4	4.26854	5.50771	1.91915	5.69052	5.83473	3.51959	5.10788	5.56177	5.44966	5.58708	3.30279	4.16509	5.75527	5.58127	5.64578	5.85338	5.88509	5.79709	4.71246	5.45967	5.28299	2.09185	5.40886	5.29382	4.73323	5.04077	3.08578	3.96569	5.41623	3.74168	5.40982	4.04224	4.28729	4.2468	5.68497	5.65572	5.61659	3.39172	5.26814	4.68418	4.02267	5.62602	3.07584	5.90983	3.96772	5.99806	5.87342	4.87331	4.74965
ASTL	5.5483	4.47396	2.98693	3.95132	3.61849	4.52667	4.2321	4.67748	4.12747	4.02474	3.30279	5.31368	3.60551	5.33729	3.94133	4.3966	5.08385	4.25629	4.40516	4.98576	3.66739	2.09185	3.64332	3.76371	4.76709	3.36863	1.99235	4.22956	2.87895	4.20142	5.44304	3.56604	3.35091	3.98401	5.35365	3.4973	3.92561	3.6726	4.21878	3.54301	5.2767	4.55717	3.81979	3.93078	3.96772	3.12125	4.25929	3.58965	4.04624
APOBEC2	3.618	4.04178	4.84135	3.01399	4.78959	3.51959	6.13029	3.40816	6.18134	3.92182	3.30279	3.94441	4.1746	3.92061	3	3.85914	3.40036	4.73495	4.83253	1.96301	2.02528	2.09185	3.16844	5.97163	3.88359	4.3007	5.62792	3.02487	4.2616	4.11626	1.88593	3.8469	1.97841	4.2468	3.94271	3.03522	4.04609	1.9462	4.2784	1.95988	4.60686	3.79801	3.53889	4.3077	6.06557	6.36066	5.44708	3.58965	3.77426
C8orf46	3.9665	3.76773	3.44953	3.47352	4.2717	1.9685	4.11644	3.60751	3.27328	4.7089	3.30279	4.93594	3.60551	4.28074	3.94133	4.04994	4.21245	3.52413	1.9385	1.96301	2.02528	2.09185	4.25413	4.35767	4.69633	3.64917	4.1739	3.77023	3.95832	1.91419	4.08505	3.56604	3.35091	4.34202	4.16123	4.23987	4.97395	1.9462	3.13143	4.01819	2.93985	3.05002	2.00463	4.84571	4.57086	4.32348	3.24311	4.31603	4.47277
C9orf131	3.618	3.28928	4.72147	3.01399	2.88928	3.24255	3.77562	4.21998	1.95319	2.74558	3.78158	1.92734	3.60551	4.36154	4.30003	4.30479	3.40036	4.55557	3.54873	3.04216	4.79493	4.89561	4.11194	4.9992	4.85439	4.762	3.08578	4.68059	4.17783	3.54254	4.67812	3.10119	3.98136	3.98401	3.94271	3.03522	3.29573	4.39294	2.71501	4.34536	4.32329	3.51752	3.07584	4.23514	4.15578	4.67375	3.99637	4.37947	3.77426
SPINK7	4.34041	6.12448	6.06255	3.47352	3.81697	6.37958	6.07814	4.99596	5.7176	5.18657	5.9631	5.50946	6.23885	5.30574	6.08298	5.79183	5.29811	5.68248	5.25033	6.09125	6.60296	5.51096	5.7686	4.03637	3.30008	5.4856	1.99235	6.64154	5.7529	5.9235	4.67812	3.56604	6.30047	3.50842	4.96812	5.38148	4.98788	5.79986	6.20332	5.44476	6.48445	1.929	6.07362	5.00893	5.58405	4.67375	5.75533	5.52073	6.10038
HTR2A	4.59484	4.22772	4.1916	3.01399	4.2717	3.24255	4.71753	4.62629	4.77074	4.1879	4.48257	4.71582	4.07535	2.98019	3.46539	4.47376	4.82926	5.04097	3.74808	4.12998	2.02528	2.09185	4.75462	3.91532	4.5871	2.91775	4.77978	5.32024	1.91666	4.4475	4.08505	4.55125	3.82961	3.04222	4.70458	1.97323	4.8385	2.9381	4.82183	3.26485	3.39408	4.34892	3.07584	3.77951	4.40564	3.12125	2.81055	4.37947	4.69518
AQP10	4.18513	5.44982	3.92657	3.75463	4.70531	4.52667	5.6345	4.86801	4.79468	5.06583	3.58274	5.22298	4.1746	4.77636	5.33856	4.83877	4.84539	5.01829	4.97145	5.57854	2.02528	5.65662	5.10295	2.83973	4.93635	4.66543	4.59609	3.77023	4.39702	4.4475	4.72322	2.00993	1.97841	5.45842	4.24464	4.48753	5.16644	4.23828	5.10303	5.59779	4.64757	3.51752	2.00463	5.05824	4.29564	5.14153	4.52478	4.73622	3.57564
FABP7	6.21866	1.94309	2.98693	4.84698	1.93233	3.87261	3.02787	3.76174	3.75112	2.74558	3.30279	4.81868	1.91747	3.44411	3.74614	4.1925	3.12583	4.25629	4.34776	1.96301	2.02528	2.09185	3.16844	4.13635	4.89169	5.19785	4.46645	3.77023	4.07861	3.89392	4.08505	4.40142	4.97704	3.78903	2.86137	4.33629	4.4214	3.87038	5.94275	3.89549	5.05653	1.929	5.39174	3.30059	3.96772	4.62168	3.52065	3.58965	3.77426
EYA1	5.85775	4.80433	4.81454	5.94472	4.90009	3.71919	5.70051	4.86801	5.168	5.69407	4.78575	6.22415	5.19423	5.18604	4.72938	5.19604	4.79491	5.48869	5.7402	4.49323	3.66739	3.57965	5.42202	5.3353	5.70749	4.73217	5.04536	5.68147	5.77253	4.94449	5.3214	4.40142	4.20263	3.98401	5.71402	3.77828	5.31969	4.56054	5.59764	4.40322	1.94433	5.35264	4.01569	5.52415	5.53927	5.63433	4.4819	4.43573	4.91465
GUCY2C	4.66693	3.76773	4.1916	4.21806	1.93233	5.60965	3.77562	3.60751	3.75112	3.64387	5.58847	5.62598	1.91747	3.72499	5.17015	4.69445	3.59982	3.87538	4.50308	3.78684	2.02528	5.39928	3.64332	3.76371	3.88359	5.24012	1.99235	5.75895	4.33387	4.92911	4.08505	5.16175	5.40864	3.50842	4.16123	1.97323	1.89203	3.87038	3.60463	3.26485	5.56579	3.79801	3.53889	3.93078	5.45162	4.32348	4.32473	5.24842	4.42237
NEK5	4.08637	3.28928	3.73054	3.95132	3.3381	4.18486	3.97022	4.42459	1.95319	1.93246	4.05421	3.94441	3.80398	3.92061	4.2046	1.88175	3.87835	3.24469	4.50308	1.96301	2.02528	2.09185	3.92144	3.56486	3.02964	3.36863	4.38593	3.96569	4.39702	4.94449	4.57048	3.8469	3.98136	3.50842	4.43501	3.97446	4.36524	4.68341	2.71501	1.95988	1.94433	3.05002	3.81979	4.7794	1.91913	4.72029	3.52065	3.78821	4.36608
NEK10	4.40331	3.28928	3.44953	3.47352	1.93233	4.56615	5.13357	4.8829	4.46142	3.1688	4.37535	3.31415	4.1746	4.96194	4.2046	4.30479	4.45744	3.72323	3.26987	4.24687	2.02528	2.09185	3.16844	4.22093	4.71518	3.36863	3.55091	4.71991	4.98962	5.17959	5.01283	3.8469	4.20263	3.78903	5.12994	4.33629	5.1901	1.9462	3.98721	1.95988	4.24029	3.79801	3.07584	5.22741	4.15578	4.76226	4.32473	4.05996	4.962
LRRC50	3.81606	3.76773	4.95337	1.97415	4.85951	4.97591	3.49514	4.8829	2.83619	3.64387	4.64329	4.88169	4.1746	5.30574	1.9036	4.3966	2.70643	3.72323	4.12367	4.4237	3.66739	2.09185	1.93492	3.28494	3.6535	4.58669	4.02692	3.96569	5.34375	5.48314	4.08505	3.8469	3.63064	4.83364	4.70458	4.5486	5.12281	4.71779	3.60463	3.74254	4.45722	3.79801	3.53889	5.38771	4.89619	3.12125	3.87339	2.86145	5.48073
C1orf150	5.41236	4.3657	3.44953	1.97415	1.93233	1.9685	3.97022	4.50198	3.27328	3.44434	4.52834	4.16509	3.32509	4.18488	3.74614	4.98736	3.98165	4.89415	3.26987	4.12998	2.02528	2.09185	4.53461	4.41428	4.05025	3.99806	3.08578	4.32529	3.32862	4.53581	4.22638	3.10119	2.90638	3.50842	4.70458	3.03522	4.79568	3.6726	3.98721	3.89549	2.93985	3.05002	2.00463	4.91961	4.29564	3.59256	4.25929	4.31603	4.42237
LOC728989	4.34041	3.28928	4.07439	3.95132	4.18777	3.99593	4.32696	3.76174	1.95319	4.45773	3.78158	2.8677	4.58704	3.72499	1.9036	4.53998	3.75402	4.09764	3.26987	1.96301	2.02528	2.09185	1.93492	3.28494	3.6535	2.91775	1.99235	1.93755	4.07861	3.26321	4.22638	2.00993	4.10254	4.2468	4.37931	4.12249	4.51706	2.9381	3.40523	3.26485	3.87268	4.61014	2.00463	3.58093	4.63551	4.32348	3.52065	5.17362	4.47277
C1orf220	5.22833	1.94309	4.36901	5.16937	4.40736	4.25981	3.97022	5.04648	3.75112	4.1879	3.30279	3.86423	1.91747	5.09809	4.87287	4.94408	5.20814	4.75868	2.83132	4.12998	2.02528	2.09185	4.60063	3.76371	5.53652	3.64917	3.55091	4.11291	4.5032	4.86058	5.21918	2.00993	3.35091	3.78903	5.22543	1.97323	5.14093	4.02043	4.87057	3.54301	4.60686	4.42873	2.00463	4.91961	3.21438	4.82996	4.32473	5.23365	5.004
KLK4	3.81606	5.46374	4.49978	3.75463	5.10341	3.99593	4.96116	4.76451	4.8592	5.11089	3.78158	5.14773	5.39822	4.63686	4.76242	5.17303	4.41717	3.72323	3.90057	4.55397	5.68452	3.57965	4.95458	4.62572	3.6535	2.91775	1.99235	4.40592	4.17783	4.27495	4.50496	2.00993	3.82961	4.13066	3.79225	5.2173	4.69343	3.87038	4.2784	2.8303	4.39477	4.55717	4.01569	3.58093	4.15578	5.0941	4.38278	4.15945	3.57564
CHRNB2	5.20543	4.75542	3.44953	5.71997	3.3381	4.48355	4.32696	5.26802	3.90389	4.68423	1.92328	5.09736	4.33085	5.34903	4.50999	5.17303	4.95488	5.40672	4.68374	5.23891	3.66739	4.325	4.79564	4.41428	5.97916	2.91775	3.08578	3.77023	4.66224	4.53581	5.49969	3.10119	4.78415	3.98401	5.61768	1.97323	5.01424	4.32138	5.21976	3.74254	4.51261	5.54301	5.11181	4.42747	3.21438	4.62168	4.63382	3.93938	3.92554
SCN2A	4.87248	5.40365	5.68229	4.58348	4.40736	5.74952	5.0801	4.8364	4.50808	5.48186	6.03824	5.27154	4.86678	4.36154	5.69435	5.58832	5.36089	4.4288	5.95764	5.55495	5.4353	5.25516	5.55796	6.1147	5.30398	6.17786	3.08578	5.76908	4.07861	5.72356	5.83389	6.46497	4.20263	5.55693	3.79225	4.23987	5.56221	5.81386	5.85705	6.01658	5.87743	3.05002	4.64224	5.51366	5.46919	3.87218	6.2138	5.58681	4.36608
CAMK2A	4.69896	5.32844	4.9334	4.21806	5.6397	3.71919	6.02283	4.56837	6.02787	5.59412	3.78158	4.38583	5.32098	4.43104	4.99533	5.26561	4.69378	4.80231	3.74808	4.4237	4.94211	5.13456	5.00345	5.85747	5.40813	4.78986	5.63399	4.11291	3.32862	4.75382	4.42858	4.66523	2.90638	4.80316	4.06248	5.47923	5.60216	3.6726	4.21878	4.95955	3.87268	3.05002	2.00463	4.60275	5.72737	6.13876	4.9569	4.64575	4.47277
IL12B	2.88546	3.28928	3.44953	1.97415	3.81697	3.87261	4.96116	3.40816	1.95319	3.1688	3.58274	3.31415	4.72189	2.98019	4.50999	4.3966	3.12583	4.37771	3.26987	1.96301	2.02528	4.95615	3.64332	3.76371	4.5616	2.91775	4.02692	3.02487	3.80745	4.49371	4.22638	2.00993	3.35091	4.65233	3.94271	4.73439	4.30188	3.87038	3.88357	3.74254	1.94433	4.65749	3.07584	4.05141	1.91913	1.9512	4.09827	4.57293	4.30254
KLRF1	4.34041	4.98626	4.07439	4.71628	3.61849	1.9685	3.49514	2.71364	3.75112	3.44434	4.23867	2.8677	3.80398	4.43104	4.6935	4.47376	3.12583	4.37771	4.83253	3.78684	3.66739	2.09185	4.65821	2.83973	3.6535	3.36863	5.21191	3.96569	4.90754	4.53581	4.86595	3.56604	1.97841	3.98401	3.94271	5.27585	4.59623	4.51092	4.15171	1.95988	4.39477	5.25976	5.04137	4.47784	4.49546	5.01908	3.52065	5.07712	5.16961
C10orf81	3.33731	4.3657	6.05708	5.7497	5.22393	5.28967	4.11644	5.99292	5.565	4.25433	5.94933	6.27396	5.10067	6.04643	5.63741	5.47957	5.40377	6.14319	5.83749	5.0595	4.94211	2.09185	4.70912	4.35767	4.61128	3.36863	4.1739	5.79465	6.3107	5.72701	5.05107	4.55125	5.92621	5.95391	5.60877	5.64573	5.96961	5.99705	5.06872	5.80537	5.50417	5.51375	5.39862	6.31078	5.89872	4.72029	3.72024	1.91031	5.70171
ZNF80	3.618	1.94309	5.11906	3.01399	4.61018	4.09811	4.63587	4.33252	1.95319	3.44434	4.63856	1.92734	5.10853	4.06018	5.20849	4.89507	4.50205	4.48802	3.54873	4.21324	4.39818	2.09185	4.25413	4.29385	4.39164	3.64917	5.04536	3.77023	4.5485	4.73537	4.95827	3.10119	3.63064	5.08399	4.79864	5.23816	5.03881	4.02043	4.21878	3.6279	3.96268	4.89214	4.37669	4.65712	4.62639	3.12125	4.20275	5.37113	4.85862
VWA3B	2.88546	4.04178	4.4388	1.97415	5.00117	3.87261	4.11644	4.93736	3.75112	3.44434	4.43191	4.53847	4.82397	5.33729	3.46539	3.58086	4.14564	4.62394	3.74808	1.96301	2.02528	2.09185	1.93492	4.13635	4.44216	2.91775	4.53565	3.77023	5.37763	5.40404	3.14209	3.10119	1.97841	3.98401	4.52986	4.48753	4.55837	3.39172	4.7025	4.83432	1.94433	4.13858	3.07584	5.65718	4.40564	3.87218	3.87339	4.48606	4.94686
C7	3.618	5.35885	5.08294	5.54822	4.97038	4.18486	5.66052	5.23183	5.95045	3.79783	5.63146	5.08636	4.77609	5.18604	4.44962	5.8029	5.44389	5.74263	5.50422	5.23891	4.13978	2.09185	4.11194	6.00068	4.2333	2.91775	5.62483	5.72911	5.13339	5.79254	5.73465	4.04224	4.69285	5.63436	5.37557	3.97446	3.57604	4.02043	3.88357	5.52062	4.60686	5.82737	4.28053	5.81645	5.59506	5.78542	5.82161	6.33795	6.56124
SVOPL	4.08637	5.04013	4.9334	4.39697	5.10341	3.71919	3.49514	5.03696	4.46142	4.53459	4.37535	4.93594	3.95492	5.07203	4.3805	5.16092	4.69378	5.06225	5.37379	4.24687	4.13978	5.46003	4.45767	4.13635	4.50573	4.21709	3.08578	4.53581	5.26219	4.27495	4.42858	2.00993	3.35091	4.49121	5.33487	1.97323	4.30188	4.56054	4.53684	3.89549	3.39408	4.77463	3.53889	4.7283	3.96772	5.16989	2.81055	2.86145	3.57564
KCNF1	1.90756	5.25709	4.602	3.47352	5.71562	2.81296	4.2321	3.60751	5.23792	5.5835	3.58274	5.36542	5.49203	4.36154	4.61117	4.86794	4.49461	5.53242	3.74808	3.78684	5.91006	5.79446	4.65821	4.85495	4.2826	5.43933	4.59609	5.00494	5.20404	3.26321	4.57048	3.8469	4.28729	5.05231	5.12994	4.41758	4.97395	3.39172	4.21878	5.58042	2.93985	4.49728	3.81979	4.84571	5.25287	3.59256	4.09827	5.042	5.79672
CAPN13	3.33731	4.56236	5.50498	5.90435	1.93233	4.98994	1.91018	5.83107	5.33934	4.97934	5.76871	5.63888	4.50041	5.91075	5.45507	5.73668	5.15167	5.67867	5.88811	4.7386	4.13978	2.09185	3.92144	4.85495	3.30008	3.84738	1.99235	5.47985	6.18948	5.48314	5.22996	2.00993	5.84567	4.99892	5.85048	6.24405	5.91447	5.96179	4.21878	5.60809	5.44294	6.27234	5.37012	5.97485	5.77759	5.66441	2.81055	2.86145	5.55993
CDKL2	4.459	4.98626	5.36128	5.00646	5.35087	5.23222	4.11644	4.62629	4.81733	3.1688	4.76086	5.19975	1.91747	3.72499	4.87287	5.49629	4.32503	4.99409	5.10448	4.24687	2.02528	2.09185	5.30564	5.23278	3.6535	4.99576	4.02692	3.48943	4.07861	4.60987	5.28799	4.71307	3.63064	4.60468	5.47475	4.23987	5.46152	5.92559	4.65385	4.20586	5.01197	3.05002	4.28053	4.05141	5.17439	4.67375	4.09827	3.93938	4.74965
WFDC12	4.96178	5.93404	6.02287	4.31511	4.67309	5.62318	5.3111	3.40816	5.27749	5.40796	5.09934	5.5598	6.01025	5.4293	5.58579	5.25657	4.97797	5.12795	4.20921	5.58493	6.37143	6.26646	5.13605	6.19484	3.88359	6.02792	1.99235	6.41626	5.60739	5.20923	5.208	2.00993	5.25013	5.13991	4.06248	5.00315	5.24589	5.72054	5.73148	5.542	6.36453	1.929	5.58875	4.47784	5.28594	5.0941	4.32473	5.65942	5.004
LOC653786	1.90756	3.76773	2.98693	3.75463	3.96802	2.81296	4.2321	4.53638	4.40984	3.44434	3.58274	4.16509	4.25854	3.92061	4.6935	4.04994	4.529	4.18284	2.83132	1.96301	4.6964	5.0089	4.95458	4.89204	3.77894	1.94704	1.99235	3.77023	3.32862	4.01564	4.62763	2.00993	3.98136	4.73441	3.59417	4.41758	3.57604	2.9381	3.13143	4.34536	4.14201	3.79801	2.00463	3.30059	3.21438	1.9512	4.38278	4.53151	3.77426
PCDHGC5	4.87447	5.58269	5.22571	5.43837	5.40154	4.84022	5.68168	4.33252	5.89385	5.74434	4.72944	4.6096	5.93769	3.44411	4.50999	5.83511	4.14564	5.07475	4.90053	4.77678	4.98706	2.09185	5.17929	5.6873	5.09268	6.11155	5.37089	6.11054	5.50877	4.5256	4.4744	5.25402	4.90452	3.50842	4.43501	5.26987	5.75178	4.45549	5.06059	6.20577	5.76737	3.88134	2.00463	5.2503	5.914	5.97897	3.52065	5.79362	5.07391
SCN5A	5.59415	1.94309	5.12151	3.95132	4.93687	4.98994	6.1518	5.16531	5.61656	5.35276	4.31152	4.16509	5.23992	4.49176	5.39494	5.45241	5.81781	5.49902	4.76474	4.89408	3.66739	2.09185	5.49056	5.9861	5.7885	4.49158	5.32357	4.71991	4.62745	4.70191	5.36549	4.75628	4.94155	4.5514	5.51369	3.97446	5.33447	4.74964	5.67075	4.01819	4.24029	5.31722	3.53889	5.48256	5.96123	5.51184	5.18965	4.61084	4.81978
HKDC1	5.72629	6.14889	5.90509	4.67623	5.45559	6.16151	3.49514	4.62629	5.71359	5.74527	5.63682	5.26502	5.67041	5.68773	5.72319	4.64881	4.71604	4.84167	5.99479	4.7386	5.16865	4.05762	4.70912	5.59758	4.32756	6.16408	3.83167	5.92872	5.30564	5.45278	4.89477	5.57876	6.13424	4.65233	5.80663	1.97323	5.65854	5.47104	4.15171	4.85483	6.29122	4.25416	5.58151	5.1662	4.86283	6.09577	4.4819	5.6345	5.05333
PLAC8L1	3.33731	1.94309	4.49978	3.01399	3.3381	3.51959	1.91018	1.91687	2.83619	3.92182	3.58274	1.92734	2.87605	3.44411	4.6935	4.04994	3.40036	3.52413	3.54873	3.50591	3.66739	2.09185	1.93492	3.28494	4.17888	1.94704	4.02692	3.48943	2.87895	3.74168	4.22638	2.00993	3.35091	4.65233	3.79225	4.12249	3.57604	3.6726	4.15171	3.89549	4.32329	3.05002	4.01569	2.85306	3.69169	3.12125	3.72024	1.91031	3.29543
C1orf95	4.50883	4.22772	4.9903	3.01399	3.61849	3.99593	4.63587	4.21998	4.46142	4.92715	4.7061	3.31415	4.69189	5.16612	4.99533	4.86794	4.06954	4.87743	3.90057	4.94263	3.66739	2.09185	4.36611	5.02489	4.65592	3.36863	4.93443	4.96633	5.317	4.67334	4.62763	3.56604	3.35091	4.5514	4.86794	3.4973	5.02674	3.6726	4.33188	4.01819	3.39408	4.80738	2.00463	4.82478	4.98181	4.49539	4.38278	4.53151	4.51832
C1orf186	5.60849	5.14751	4.36901	3.01399	5.85668	3.24255	5.69516	4.72324	5.74522	4.3133	5.0776	4.58003	4.50041	4.90233	3.46539	5.19604	4.529	4.80231	5.73786	4.49323	5.80459	4.63693	4.86705	5.55828	5.66191	5.42213	5.66514	5.3794	3.95832	6.07732	5.15903	4.66523	4.72545	4.83364	5.03477	6.00095	5.05049	5.61827	4.07537	5.55211	5.77526	3.51752	4.01569	5.1662	4.7417	5.6819	3.52065	6.10934	5.13505
SIGLEC11	4.96178	3.28928	5.9336	3.01399	3.96802	5.79591	4.58843	4.46486	3.27328	3.64387	4.98902	4.53847	4.50041	4.36154	5.08696	3.85914	3.98165	4.4288	6.0896	3.78684	2.02528	2.09185	4.92758	5.29933	4.44216	5.46338	4.38593	3.96569	3.80745	4.49371	4.67812	5.50347	5.98763	4.91326	4.43501	3.77828	4.30188	6.28565	3.60463	4.20586	5.22089	4.70021	4.45775	4.63772	4.49546	3.12125	4.4819	4.53151	4.30254
CASC1	4.40331	3.76773	2.98693	4.31511	2.88928	4.09811	3.77562	4.67748	4.02626	2.74558	4.73438	4.8408	3.95492	4.92327	3.94133	4.04994	3.87835	3.24469	4.83253	4.12998	2.02528	2.09185	1.93492	3.28494	4.05025	3.84738	3.08578	3.48943	5.14307	5.16369	4.22638	3.10119	3.82961	4.2468	4.52986	4.12249	4.95946	4.23828	2.71501	4.68418	1.94433	5.02047	4.28053	5.10152	3.69169	4.06497	2.81055	3.93938	4.79772
WISP2	4.08637	5.81051	4.78579	4.78669	5.11436	3.71919	6.11187	3.76174	5.50151	5.60602	5.13914	5.78604	5.81544	5.31875	4.56339	5.10739	4.56103	4.68308	4.73941	4.4237	5.71449	2.09185	5.83842	5.11228	5.58197	3.36863	5.13077	6.16932	4.80309	5.30114	5.76061	4.30583	3.98136	4.5514	5.19659	3.97446	5.61128	4.80685	4.67883	4.28019	3.39408	5.03813	4.01569	5.37063	5.24103	5.56532	6.08877	5.94875	4.94686
NR2E3	3.33731	3.28928	4.28787	1.97415	3.61849	4.09811	4.11644	2.71364	1.95319	3.79783	4.05421	4.0653	3.32509	1.89913	4.50999	3.58086	3.75402	1.89419	3.54873	1.96301	4.39818	2.09185	3.16844	4.29385	4.47504	3.84738	3.08578	3.02487	3.60908	3.89392	4.50496	3.8469	4.20263	3.50842	4.06248	1.97323	4.72147	4.02043	4.59914	2.8303	4.60686	1.929	4.37669	3.58093	3.69169	1.9512	1.95233	3.30932	3.57564
HIST1H3F	4.55386	3.28928	2.98693	4.31511	4.70531	4.09811	3.97022	1.91687	4.35226	3.64387	2.8573	2.8677	3.80398	4.06802	3.74614	3.85914	2.70643	2.80323	3.74808	3.04216	4.13978	5.09707	3.64332	4.13635	3.88359	3.36863	5.06411	3.02487	3.80745	3.54254	4.76395	2.00993	3.35091	4.34202	4.31651	3.03522	4.72147	3.39172	2.71501	4.20586	3.67499	3.51752	4.84313	3.30059	3.21438	3.59256	3.99637	4.31603	4.1458
SLC1A7	4.59484	4.84805	4.36901	3.75463	4.0884	2.81296	5.01699	4.21998	4.12747	2.74558	4.8314	4.58003	4.74987	4.77188	4.3805	4.69445	4.529	4.91019	4.98576	3.98257	3.66739	2.09185	5.13605	4.79175	4.6766	3.36863	3.55091	5.28982	2.87895	4.79996	4.57048	3.8469	1.97841	4.60468	4.64285	3.4973	3.77455	3.39172	3.75895	2.8303	1.94433	4.20061	2.00463	4.70023	4.89619	4.49539	4.60029	4.78727	4.1458
RSPH1	4.08637	5.18264	3.92657	3.95132	4.73535	3.71919	4.75315	5.17843	5.03269	4.53459	4.67585	5.40962	5.00201	5.59365	4.87287	4.98736	3.59982	4.75868	4.58416	4.34285	3.66739	5.58365	3.64332	3.28494	4.90335	2.91775	3.55091	3.48943	5.7529	5.65628	4.50496	3.56604	2.90638	5.55359	4.67486	4.77075	5.35314	4.45549	4.33188	5.15648	4.45722	4.73904	3.81979	5.72013	4.57086	3.59256	3.87339	3.93938	5.58325
NWD1	5.38697	4.88746	5.22545	3.75463	4.51373	5.38504	4.9993	5.36405	4.97829	3.79783	5.41772	5.5371	4.45018	6.01747	3.46539	4.96636	4.06954	5.41707	5.94928	3.98257	3.66739	2.09185	1.93492	3.91532	4.53449	4.66543	4.1739	5.23799	6.12015	5.75902	5.67472	3.56604	4.53172	4.88847	5.65958	4.41758	4.72147	5.08262	5.05957	5.12868	5.57126	4.77463	5.43092	5.93264	5.29626	4.49539	3.72024	4.95949	5.35686
EGR4	4.34041	5.16552	5.55931	4.8995	5.09212	5.54756	3.77562	3.76174	2.83619	5.05606	5.06621	5.07501	4.80074	4.28074	4.44962	5.35078	3.87835	4.80231	4.89058	4.4237	4.13978	3.57965	3.64332	4.59055	4.84113	6.11876	3.55091	1.93755	4.5485	5.35915	4.08505	2.00993	5.39395	3.98401	5.17316	5.26678	4.36524	5.42046	4.07537	3.89549	5.02744	4.49728	4.90272	4.15098	5.75184	4.56284	5.47323	3.58965	4.89744
SGCA	4.80697	4.3657	5.18765	4.52898	5.17359	5.10725	6.15246	4.07721	6.05353	4.88271	4.23867	4.0653	5.00201	3.44411	4.2046	4.30479	4.41717	4.65449	4.28311	4.49323	4.13978	2.09185	4.11194	5.90459	4.95681	5.36898	5.7116	5.41328	4.84823	4.77753	4.22638	4.61172	3.82961	4.83364	4.43501	1.97323	3.29573	4.02043	3.75895	3.74254	4.85825	4.55717	4.01569	4.3712	5.98122	6.21721	5.38246	4.95949	5.10663
COL4A3	4.85182	4.22772	5.12151	4.21806	4.6004	3.99593	5.83779	4.42459	5.47996	3.44434	5.27592	4.74402	5.83307	5.25541	4.50999	5.24725	4.75736	4.09764	5.4033	4.69913	2.02528	2.09185	3.64332	5.6107	5.10892	5.23209	5.57003	4.47524	4.33387	5.38849	5.49102	3.56604	4.10254	5.43387	5.0583	3.4973	4.66341	4.9222	3.60463	4.5837	5.35427	4.73904	3.81979	5.13074	5.71639	5.66183	5.16562	5.63797	5.92405
DRD2	5.40412	4.75542	4.28787	4.31511	3.96802	3.51959	4.67864	4.33252	4.12747	4.89808	4.23867	4.53847	4.07535	4.36154	4.3805	4.59777	4.45744	4.65449	3.74808	3.98257	2.02528	2.09185	4.95458	4.81392	3.49879	4.21709	1.99235	3.77023	5.01794	4.27495	5.01283	3.10119	3.98136	3.98401	4.88659	3.4973	4.6311	4.23828	3.75895	4.11976	4.45722	3.05002	3.07584	5.24107	4.29564	3.12125	2.81055	1.91031	4.04624
LOC150197	4.40331	3.76773	4.49978	3.47352	3.81697	3.71919	3.02787	3.88603	3.27328	4.45773	1.92328	2.8677	1.91747	4.43104	4.84797	4.59777	4.21245	4.4288	2.83132	1.96301	4.57012	4.74055	4.53461	4.65831	4.7505	2.91775	3.55091	3.96569	3.80745	4.01564	4.89477	2.00993	2.90638	4.2468	3.94271	3.4973	4.69343	4.13991	4.42444	4.01819	4.24029	3.79801	3.53889	3.58093	3.21438	3.59256	1.95233	3.58965	3.29543
CLEC17A	3.618	4.04178	5.06906	1.97415	5.01565	2.81296	4.32696	3.13336	3.55175	4.25433	5.31658	4.53847	4.65965	4.49176	3	5.00724	3.40036	5.11931	5.25682	4.86739	4.13978	2.09185	3.64332	4.68858	4.05025	5.25561	3.83167	3.96569	3.80745	4.97347	4.97006	5.50347	5.06706	5.19902	4.99629	5.0896	5.19762	3.39172	3.40523	4.61971	4.14201	4.70021	3.81979	4.42747	5.78277	1.9512	5.28916	5.96936	5.78526
TNFRSF13B	4.18513	3.28928	4.86648	3.75463	4.2717	1.9685	4.75315	4.07721	4.02626	2.74558	5.40981	3.59428	3.60551	5.31875	4.08826	5.52334	3.87835	4.59107	3.90057	5.46452	4.87504	3.57965	4.65821	4.03637	3.49879	2.91775	4.29036	4.89991	3.95832	5.5233	5.46325	3.56604	3.35091	4.6953	5.20405	4.23987	4.51706	4.13991	2.71501	4.61971	4.7805	4.70021	4.37669	5.09119	3.69169	1.9512	4.97143	6.03851	6.04567
KRT3	4.63238	4.95605	4.1916	4.31511	1.93233	4.18486	3.02787	3.13336	4.02626	3.92182	3.93313	4.38583	4.39411	4.88017	4.89622	5.65849	5.31506	4.55557	4.98576	4.4237	5.88265	2.09185	3.16844	4.03637	4.5616	4.81596	3.08578	4.71991	5.39107	5.02542	3.89542	4.04224	4.85917	4.5514	5.15652	4.12249	4.91223	3.87038	3.88357	3.74254	5.30473	4.96174	3.53889	2.85306	4.15578	4.49539	2.81055	4.73622	4.962
SCARNA2	4.26854	3.28928	3.44953	4.1	3.61849	3.87261	3.49514	2.71364	2.83619	4.02474	4.48257	4.49279	4.39411	2.98019	4.76242	3.85914	3.59982	3.24469	1.9385	1.96301	5.04953	4.89561	3.16844	4.68858	4.47504	3.36863	4.29036	1.93755	1.91666	4.77753	4.50496	4.04224	3.82961	4.60468	3.31352	4.41758	4.22945	5.01102	3.13143	3.89549	4.14201	4.65749	4.80975	4.42747	3.21438	4.72029	4.60029	4.95949	4.77438
EPGN	4.50883	5.25709	5.13347	4.67623	5.28093	5.27776	5.90797	3.88603	4.40984	5.76022	5.61851	4.71582	5.96894	4.28074	4.56339	4.89507	3.75402	5.35289	4.71246	4.24687	6.03174	5.87524	4.45767	5.25864	3.77894	5.90525	5.34838	6.24672	5.93867	5.2791	3.14209	4.18931	2.90638	3.04222	1.88259	3.4973	5.60401	5.32998	5.21389	5.3051	6.1875	1.929	5.44294	5.06958	4.92694	3.59256	5.25921	5.56727	5.28566
LILRA4	4.83002	4.75542	5.2071	3.01399	4.34408	1.9685	5.22976	3.13336	3.55175	2.74558	5.48985	4.53847	5.52942	5.23943	4.2046	5.36398	4.89018	5.38484	3.90057	4.34285	5.09368	5.25516	5.13605	4.13635	5.10237	3.84738	4.1739	3.77023	4.58971	5.12039	5.30514	2.00993	1.97841	5.1766	5.51108	4.41758	4.79568	3.39172	3.75895	5.05381	4.14201	5.31722	3.07584	5.19822	4.86283	3.59256	5.31123	5.78947	5.70925
GRM4	5.97053	4.98626	3.73054	3.95132	5.67643	2.81296	5.21068	3.40816	5.565	5.80557	3.30279	4.0653	5.51278	5.20483	4.50999	4.86794	4.73719	4.62394	4.54537	4.98576	5.16865	4.05762	4.65821	5.82006	5.39003	4.11812	4.81569	3.77023	5.14307	3.74168	4.83479	2.00993	4.36036	4.88847	5.77475	3.97446	4.81768	1.9462	5.76222	4.65311	2.93985	5.16672	4.77355	4.15098	4.40564	5.01908	4.52478	5.042	5.1613
RSPH4A	4.94554	3.28928	3.92657	3.75463	2.88928	4.25981	3.97022	5.18483	4.40984	4.11223	4.73438	5.10806	3.32509	5.38687	4.56339	4.83877	4.41717	4.65449	4.76474	3.98257	2.02528	2.09185	4.45767	4.29385	5.32791	1.94704	3.08578	4.22956	5.51973	5.47732	4.9466	4.482	3.35091	4.80316	5.09082	3.77828	5.20498	2.9381	4.85497	4.45506	3.67499	4.34892	4.16341	5.59799	4.63551	3.87218	2.81055	4.57293	5.33815
TTLL10	5.23565	3.28928	3.73054	3.47352	3.96802	4.32554	4.2321	4.42459	3.55175	3.44434	4.8314	4.32213	1.91747	5.23943	3.94133	4.3966	4.14564	3.52413	4.58416	4.24687	4.39818	4.325	3.16844	4.03637	4.86723	1.94704	1.99235	3.48943	4.7523	5.567	4.50496	3.10119	3.63064	4.77019	4.75841	4.48753	4.66341	4.13991	3.75895	1.95988	4.64757	3.05002	4.01569	5.24107	4.15578	4.20942	5.15722	3.93938	4.69518
JAKMIP2	5.87412	5.8346	5.79181	6.11265	5.44814	4.38393	5.70226	5.58126	4.65855	4.88271	4.95559	5.42562	5.65243	6.06802	6.10153	5.9524	6.07893	6.03015	5.57361	5.33001	4.39818	2.09185	5.79526	5.09237	4.91108	5.02089	4.1739	4.58941	3.92536	5.06501	5.91005	3.10119	5.10307	5.16166	5.6997	4.88516	5.54667	6.0918	6.10654	4.83432	3.87268	4.70021	5.02144	4.39451	4.63551	4.54096	5.26543	5.48969	5.01377
CHD5	4.85182	3.28928	1.91915	1.97415	5.26074	3.51959	4.53545	3.88603	3.27328	5.43061	4.15409	4.24944	4.45018	4.28074	4.08826	4.53998	5.15843	4.75868	3.90057	3.04216	4.87504	2.09185	3.16844	5.07129	4.2333	4.11812	5.5205	3.48943	4.5485	4.20142	4.33768	3.10119	3.82961	4.60468	4.52986	4.65104	4.69343	3.87038	4.38028	3.26485	3.39408	4.49728	3.07584	3.58093	3.69169	3.12125	3.52065	4.31603	4.04624
TCAM1P	4.87248	4.56236	4.36901	3.95132	5.09212	4.85995	4.94051	3.40816	4.12747	4.79533	5.62782	5.08636	5.33703	4.43104	5.59598	5.14833	3.59982	4.78109	4.50308	1.96301	2.02528	4.05762	4.11194	4.90936	5.39533	4.21709	3.83167	1.93755	5.33859	5.35022	5.73805	5.29361	4.28729	4.86198	4.06248	4.73439	4.94437	5.58432	5.0863	4.11976	6.06037	5.10117	4.16341	4.52342	5.18882	4.49539	2.81055	4.24356	3.29543
ZDHHC8P1	3.618	5.27014	4.36901	4.67623	5.06839	2.81296	4.63587	5.27763	3.27328	6.11616	4.31152	5.2447	5.31544	5.1223	5.58579	5.62078	5.35735	5.42378	3.26987	4.89408	4.87504	2.09185	5.49558	4.79175	5.96519	5.21541	4.02692	3.96569	4.33387	3.74168	4.57048	3.56604	3.98136	5.15258	4.98246	3.97446	4.89509	4.39294	5.58437	5.33233	3.67499	5.25976	3.81979	5.29052	3.69169	4.20942	4.99889	3.78821	3.92554
EMR4P	4.83002	1.94309	4.81454	3.47352	4.0884	3.51959	4.78592	4.42459	3.55175	4.1879	4.64329	3.79302	2.87605	4.77636	4.56339	4.64881	4.32503	4.37771	3.54873	4.24687	4.13978	2.09185	5.19398	4.22093	4.73323	4.78986	3.55091	3.48943	4.66224	4.67334	4.83479	2.00993	3.35091	4.77019	3.94271	5.00315	5.07272	3.39172	3.75895	3.74254	4.60686	4.86582	3.07584	3.58093	4.6919	1.9512	3.72024	5.042	4.97655
KIF5A	5.25656	4.04178	4.68516	3.47352	3.96802	4.38393	4.47548	5.30051	3.55175	5.24826	4.15409	4.77044	3.95492	4.18488	5.20032	5.33698	4.98898	5.22377	4.40516	3.78684	2.02528	2.09185	4.36611	4.71687	4.96666	4.43571	3.08578	3.77023	3.80745	3.74168	5.208	3.8469	4.20263	3.98401	5.21847	3.77828	5.2878	4.74964	4.72491	3.74254	4.56215	3.99251	2.00463	4.3077	3.69169	3.59256	2.81055	3.78821	4.47277
FRMPD1	4.63238	4.04178	3.92657	1.97415	3.81697	2.81296	5.12097	2.71364	4.02626	4.3133	1.92328	1.92734	4.69189	3.92061	3.94133	4.1925	3.40036	2.80323	4.45659	4.65575	3.66739	5.13456	3.16844	4.79175	3.77894	4.37271	3.83167	5.93013	4.5032	3.89392	4.08505	4.04224	3.82961	3.50842	3.59417	3.4973	4.14547	4.02043	4.2784	4.74035	4.64757	4.25416	2.00463	4.05141	4.40564	4.32348	3.72024	4.91017	4.81978
RAB3B	5.38697	6.04878	6.20533	4.67623	4.76336	4.25981	4.32696	5.67293	4.12747	5.25932	5.7006	5.2516	4.92326	5.7742	5.54679	5.26561	5.85976	5.30255	6.08444	5.64166	4.94211	3.57965	6.0052	5.65434	4.85439	6.01999	5.06411	3.02487	4.33387	3.74168	5.10154	5.02074	6.06786	3.78903	5.21134	4.5486	5.38321	5.98264	5.79254	4.11976	5.66031	4.42873	2.00463	6.1304	4.7417	4.83533	5.53484	3.58965	4.23001
PGM5P2	3.9665	3.28928	4.49978	1.97415	3.3381	3.71919	4.2321	3.76174	4.02626	3.44434	3.58274	4.32213	3.60551	4.49176	3.46539	3.10641	3.75402	3.87538	2.83132	3.50591	2.02528	2.09185	4.11194	4.22093	4.05025	3.36863	1.99235	4.75595	4.17783	4.01564	3.14209	3.56604	1.97841	3.04222	4.06248	1.97323	4.30188	1.9462	3.13143	4.01819	1.94433	3.05002	2.00463	4.15098	4.63551	3.87218	2.81055	4.05996	3.57564
DCDC2	3.618	4.56236	4.53979	3.75463	2.88928	3.87261	3.77562	4.95906	3.55175	3.1688	4.7884	4.55886	3.80398	4.89515	4.55165	4.80726	4.79866	5.26786	4.54537	4.87665	5.28299	2.09185	3.64332	4.51069	5.7908	4.11812	1.99235	4.32529	5.05671	4.94162	4.57048	4.61172	4.33021	3.98401	5.11095	3.4973	3.76938	4.56707	1.93243	4.01819	4.68483	5.16672	4.45775	4.95184	4.53995	3.12125	2.81055	3.02335	4.47277
IL1F10	4.40331	5.24348	5.62573	3.95132	4.2717	5.32301	4.11644	4.15321	3.27328	4.1879	5.10975	3.59428	4.25854	4.54543	4.79299	4.04994	4.45744	4.4288	4.65295	5.16071	6.00776	2.09185	3.92144	5.23278	1.89017	5.22383	1.99235	5.80463	5.63242	4.72866	4.67812	5.18979	5.25791	4.49121	3.59417	3.77828	4.14547	5.05566	4.2784	4.45506	6.0337	1.929	5.68931	3.77951	3.21438	4.67375	4.09827	4.24356	4.55974
ART5	3.33731	4.3657	3.44953	1.97415	4.76336	3.51959	5.19042	5.30922	3.55175	4.3133	1.92328	4.38583	4.88652	3.72499	4.44962	4.53998	5.43847	5.40672	3.90057	3.98257	2.02528	2.09185	5.00345	5.43366	4.92566	4.11812	3.55091	4.47524	3.60908	3.26321	5.14556	2.00993	3.35091	3.98401	4.37931	3.77828	4.7724	3.39172	4.65385	3.74254	3.67499	3.05002	2.00463	3.77951	3.69169	4.67375	4.18462	4.15945	4.1458
HIST1H1D	4.89208	4.22772	4.28787	5.43277	5.5763	5.26539	5.0801	5.09899	5.15027	5.20631	4.73438	3.94441	4.72189	4.67628	4.30003	3.58086	3.12583	3.72323	3.54873	4.24687	5.34883	2.09185	4.11194	4.59055	3.97281	4.84052	4.77978	1.93755	3.80745	4.89637	5.29668	4.04224	4.92248	4.65233	3.59417	4.98319	5.06179	4.45549	2.71501	4.28019	4.39477	4.73904	5.09541	4.3712	3.96772	4.62168	5.13978	5.24167	5.15278
NMUR1	3.33731	1.94309	2.98693	3.01399	3.61849	2.81296	3.49514	4.74441	3.27328	5.29038	3.58274	3.94441	4.25854	4.54543	3.46539	4.30479	4.71604	4.32061	4.12367	3.50591	4.6964	2.09185	3.64332	4.83496	3.88359	3.99806	1.99235	4.32529	4.17783	4.11626	4.92159	4.04224	2.90638	3.98401	4.31651	4.12249	4.66341	2.9381	4.42444	3.54301	2.93985	5.0019	3.53889	3.58093	4.49546	4.32348	3.87339	4.64575	4.36608
CD19	4.18513	4.04178	5.23423	3.75463	4.76336	4.09811	4.8708	4.92446	3.90389	4.65807	5.65555	4.16509	4.86678	5.61894	4.72938	5.72189	4.67023	5.11931	5.02563	5.63652	5.13311	2.09185	5.13605	4.29385	3.49879	2.91775	4.87941	5.128	4.62745	5.81172	6.04777	2.00993	4.42429	5.50999	5.55678	4.41758	5.28214	5.02652	3.98721	5.4723	4.71917	5.39032	4.90272	5.49713	4.92694	3.12125	5.54714	6.35071	6.289
PNMT	5.18081	3.28928	4.4388	3.47352	3.81697	4.52667	5.36364	4.53638	4.91474	4.11223	3.93313	3.79302	2.87605	4.9431	4.56339	4.1925	3.12583	3.72323	4.9566	4.65575	4.79493	4.50447	1.93492	4.92589	3.88359	4.21709	4.53565	3.02487	1.91666	4.11626	4.76395	3.8469	3.63064	1.93815	4.43501	3.4973	4.04609	4.39294	4.2784	1.95988	4.68483	5.10117	5.29475	4.3712	5.15926	5.4459	4.52478	2.86145	3.57564
DLGAP2	5.22089	4.6365	4.1916	1.97415	4.90009	3.87261	3.77562	2.71364	3.55175	4.02474	3.30279	4.65317	3.80398	4.28074	4.08826	4.04994	4.21245	3.24469	4.0227	3.78684	4.94211	2.09185	3.64332	1.90676	3.6535	4.84052	1.99235	3.96569	3.60908	4.72866	4.42858	2.00993	5.1168	3.50842	4.95318	3.03522	4.6311	2.9381	3.13143	1.95988	2.93985	3.51752	3.53889	3.58093	3.96772	3.12125	3.52065	4.15945	4.7233
KIRREL3	4.63238	4.04178	4.1916	3.01399	2.88928	4.43625	4.40684	5.94897	4.28736	5.27522	4.73438	3.59428	4.07535	4.59347	5.5047	4.3966	4.37322	5.32899	4.68374	5.36851	4.13978	2.09185	4.8985	4.79175	5.71551	4.11812	3.83167	5.0228	5.03136	4.11626	3.89542	3.56604	4.36036	4.83364	5.66975	4.12249	4.22945	4.51092	5.72857	4.94392	4.83392	4.49728	4.28053	5.30174	4.95535	1.9512	4.38278	4.76255	4.84068
GPR15	5.09371	3.28928	5.38891	3.01399	3.81697	4.38393	4.40684	4.8364	1.95319	4.02474	5.88234	1.92734	5.61021	4.9431	5.15943	5.8864	5.41284	5.78253	5.47746	5.72614	2.02528	2.09185	5.04658	4.68858	4.17888	4.11812	4.95934	5.86855	5.13339	5.91655	5.68333	4.40142	4.90247	4.49121	6.01727	4.86403	5.47668	5.20237	4.83875	5.40216	4.80811	4.55717	4.52748	5.35712	5.55224	1.9512	5.10201	5.61459	5.87607
FBXO15	5.13521	5.21445	1.91915	4.92338	5.02957	3.99593	3.97022	4.42459	4.40984	3.92182	3.93313	5.33014	4.25854	5.08531	4.44962	4.69445	4.21245	4.89415	1.9385	4.12998	2.02528	5.19987	4.8985	4.03637	5.08885	2.91775	3.83167	3.77023	4.7523	4.91311	5.18444	3.10119	3.35091	4.60468	5.00956	3.77828	4.72147	4.02043	4.83875	4.54455	2.93985	4.61014	3.07584	5.11156	3.69169	5.36081	4.4819	4.61084	4.962
MYO3B	4.91077	5.35885	3.92657	4.52898	4.78959	6.10175	4.67864	5.37806	4.58946	5.36849	6.02771	6.05038	5.16876	4.88017	5.13697	5.28297	5.71441	4.95451	5.90375	4.49323	5.13311	4.74055	4.45767	4.13635	4.40689	5.49609	5.08195	5.85115	5.75851	5.86385	4.80091	6.14563	4.99362	5.85394	5.36701	3.4973	5.62857	4.02043	4.15171	6.0435	5.64637	4.34892	4.16341	5.05824	4.57086	4.06497	3.24311	5.72701	5.89641
LOC441455	4.92854	4.84805	4.602	4.39697	3.96802	4.09811	4.53545	3.13336	2.83619	4.68423	4.23867	4.65317	4.92326	4.71236	4.76242	4.80726	3.59982	4.55557	1.9385	4.86739	2.02528	2.09185	4.92758	4.79175	1.89017	4.21709	4.77978	5.0228	4.84823	4.27495	4.80091	4.30583	3.63064	1.93815	4.06248	4.12249	3.57604	4.32138	2.71501	3.89549	4.02267	4.70021	3.81979	4.05141	3.21438	3.12125	4.63382	4.61084	4.94686
RBM24	4.63238	5.29477	5.23423	4.52898	5.32926	4.91388	5.99811	4.701	6.01357	5.84615	4.15409	5.44078	5.17746	4.92327	4.72938	5.53061	5.31091	5.09196	4.34776	5.09146	4.79493	2.09185	4.83293	5.93376	5.42281	5.63609	5.83227	4.92334	5.41217	5.11102	5.93559	4.66523	5.31432	4.2468	4.99629	4.23987	3.92561	4.02043	4.50226	5.37152	4.24029	3.99251	2.00463	5.41164	5.95888	6.23103	5.61317	4.61084	4.91465
RPH3A	3.81606	3.28928	3.92657	3.95132	4.0884	2.81296	3.02787	3.13336	3.27328	4.56877	3.58274	4.32213	4.25854	4.71236	3.94133	4.1925	3.59982	5.10133	3.90057	4.24687	4.6964	2.09185	4.25413	3.91532	3.6535	4.21709	3.55091	1.93755	1.91666	4.33927	3.89542	4.66523	1.97841	3.50842	4.90435	3.03522	4.22945	2.9381	5.76644	3.54301	1.94433	3.99251	2.00463	3.58093	4.86283	1.9512	3.24311	4.05996	4.23001
KRT1	6.13445	6.68482	6.32765	5.94761	6.47745	4.18486	6.73261	5.95184	6.0489	6.36826	5.42919	4.49279	6.25546	6.35303	5.70107	6.25684	6.63111	5.93115	5.39102	5.98576	7.11989	6.66549	5.39511	6.08777	5.67528	5.4856	6.50545	6.97724	6.8925	4.64276	5.56066	5.14684	5.75941	5.5853	6.66887	5.91222	6.3266	6.26985	6.54784	6.8738	6.63212	6.43618	5.00044	5.19822	5.89974	6.01784	4.90976	6.88789	5.76248
H2AFB1	3.618	1.94309	4.4388	4.31511	4.51373	3.51959	3.49514	2.71364	3.90389	3.79783	3.93313	2.8677	4.33085	1.89913	3	4.04994	3.87835	3.24469	2.83132	1.96301	4.79493	2.09185	3.16844	5.48456	4.36883	5.92738	1.99235	3.77023	3.60908	6.01331	4.42858	6.02114	3.82961	4.77019	3.79225	4.23987	2.84719	4.13991	4.07537	2.8303	5.08348	4.61014	4.01569	3.77951	4.15578	3.12125	3.52065	4.15945	4.04624
TMC1	3.618	4.22772	3.44953	3.47352	4.0884	1.9685	3.02787	4.07721	4.12747	1.93246	3.58274	1.92734	3.80398	2.98019	3	4.3966	4.41717	4.55557	4.90818	4.24687	4.39818	4.74055	3.92144	4.46493	3.6535	1.94704	3.55091	3.48943	3.95832	2.822	4.50496	4.97529	2.90638	3.04222	3.59417	3.97446	4.6311	2.9381	2.71501	3.54301	2.93985	3.79801	4.01569	3.93078	3.96772	4.62168	4.87487	3.78821	3.92554
C2orf72	5.09371	5.88841	3.92657	5.49831	4.90009	4.25981	3.77562	5.43966	3.55175	5.67819	3.30279	3.31415	4.74987	4.96194	5.29891	5.5825	6.01719	5.30748	4.0227	5.28531	5.52601	2.09185	5.4583	5.31006	3.77894	4.90622	3.08578	4.58941	4.77849	2.822	5.74798	4.61172	4.83563	3.78903	5.43637	4.60266	5.67158	4.32138	5.07762	3.26485	4.32329	5.12891	5.5586	5.45097	4.29564	4.8004	4.74718	1.91031	4.04624
HES5	5.059	5.18264	5.49418	3.01399	4.51373	5.76955	4.9807	4.33252	4.40984	4.79533	4.56999	4.53847	4.80074	5.29219	4.44962	5.0771	4.8609	4.75868	5.66642	4.65575	5.76111	5.46003	4.53461	4.22093	3.30008	5.72582	1.99235	5.75144	5.49945	5.54718	4.22638	5.6843	5.64448	4.91326	4.73239	5.20645	4.59623	5.77038	4.74616	5.16527	5.60674	4.25416	5.57781	4.7283	5.1269	4.06497	4.18462	5.22773	5.11639
HIST1H4I	4.459	3.76773	2.98693	4.52898	4.83753	4.56615	3.49514	2.71364	3.90389	3.92182	3.58274	3.31415	2.87605	4.18488	4.08826	3.85914	3.87835	2.80323	1.9385	1.96301	4.39818	2.09185	3.16844	4.41428	3.02964	3.64917	3.08578	3.48943	3.32862	3.74168	1.88593	2.00993	4.28729	3.78903	3.31352	4.12249	4.14547	3.39172	3.60463	1.95988	2.93985	3.51752	3.53889	1.90476	3.21438	3.12125	3.24311	4.24356	4.30254
CPNE9	3.618	1.94309	3.44953	3.47352	4.5591	4.8967	5.31818	2.71364	4.35226	3.64387	3.58274	3.31415	4.1746	2.98019	3.74614	3.10641	2.70643	3.24469	4.54537	3.04216	4.13978	2.09185	4.11194	3.28494	4.76709	3.64917	1.99235	1.93755	3.32862	3.26321	4.33768	3.10119	3.63064	1.93815	3.59417	1.97323	3.29573	3.39172	2.71501	1.95988	3.87268	4.13858	2.00463	2.85306	1.91913	1.9512	3.24311	3.93938	3.57564
NXNL2	2.88546	4.04178	3.44953	1.97415	4.0884	3.87261	3.49514	3.98932	3.75112	5.01421	1.92328	2.8677	2.87605	4.06802	4.95879	3.58086	4.75736	3.52413	4.0227	4.24687	2.02528	2.09185	4.36611	3.28494	3.88359	3.84738	3.08578	3.02487	3.32862	3.74168	3.14209	2.00993	1.97841	3.78903	4.16123	3.4973	4.04609	2.9381	2.71501	2.8303	1.94433	3.51752	2.00463	3.93078	3.21438	1.9512	3.52065	3.30932	3.77426
GP5	1.90756	4.47396	4.07439	3.47352	4.18777	3.24255	4.8708	4.15321	2.83619	3.44434	4.05421	4.0653	3.60551	4.54543	3	4.3966	4.2718	3.52413	3.90057	3.04216	4.13978	2.09185	4.11194	4.03637	4.40689	3.36863	3.83167	4.22956	4.2616	4.27495	1.88593	2.00993	2.90638	4.13066	4.80589	1.97323	4.22945	3.39172	3.40523	3.54301	1.94433	3.99251	2.00463	4.05141	3.21438	3.12125	3.72024	5.22773	5.41439
KISS1R	3.33731	4.04178	2.98693	5.16937	5.10341	4.56615	3.49514	3.76174	3.27328	4.89808	4.23867	4.74402	4.50041	3.44411	3	4.1925	3.12583	4.25629	3.26987	3.50591	4.6964	2.09185	1.93492	4.13635	2.62465	4.78986	1.99235	3.48943	4.39702	4.4475	4.80091	5.45997	4.90247	3.50842	3.94271	4.23987	4.81768	4.99486	3.60463	4.01819	3.39408	3.51752	5.5703	4.3077	1.91913	4.49539	3.24311	4.24356	4.23001
GABBR2	5.08254	4.70003	4.49978	3.95132	3.61849	4.8195	3.02787	4.21998	5.22357	4.85001	2.8573	3.59428	3.80398	2.98019	4.79299	4.1925	3.87835	4.47496	4.34776	1.96301	4.13978	4.325	4.79564	4.22093	3.6535	4.62781	5.04536	4.53581	3.32862	5.98919	4.76395	5.22803	3.98136	5.3585	5.09082	1.97323	4.59623	5.11959	4.98829	4.28019	4.14201	4.13858	4.37669	3.77951	5.1269	3.12125	4.09827	1.91031	4.04624
ABHD12B	5.91558	4.47396	5.55931	4.31511	3.3381	5.94742	3.02787	5.5212	4.50808	4.95416	4.31152	4.24944	4.07535	4.85667	5.38448	4.04994	3.75402	5.62139	5.08369	3.04216	4.87504	2.09185	3.16844	5.56051	3.77894	4.70009	3.83167	4.22956	4.45306	4.60987	6.04234	4.61172	4.92248	3.50842	5.71873	4.12249	3.92561	1.9462	4.46495	4.45506	5.54574	1.929	6.00834	3.93078	4.29564	5.27431	1.95233	4.05996	4.42237
SLC6A11	4.87248	5.66671	4.68516	5.6643	5.79083	3.24255	5.71419	4.07721	6.20711	5.94457	5.87117	1.92734	5.82062	3.92061	1.9036	5.58543	5.23576	5.66688	1.9385	5.29382	5.67152	2.09185	4.83293	4.65831	3.30008	5.7907	5.99982	6.11187	6.03412	5.50261	4.50496	2.00993	5.43166	4.13066	5.89489	5.47455	5.80845	4.97795	4.91396	6.15807	6.02289	5.62602	2.00463	4.15098	6.0228	6.02789	1.95233	6.0409	5.88792
ATP8A2	4.459	4.75542	3.92657	3.95132	5.12497	1.9685	4.84447	4.76451	5.40779	5.69049	4.15409	4.91869	4.88652	4.28074	4.3805	5.29128	5.24102	5.19015	3.74808	4.4237	4.6964	5.0089	5.27599	4.97161	5.78734	3.64917	4.64953	4.22956	4.39702	4.01564	4.72322	3.10119	3.35091	5.41264	5.23227	4.33629	4.81768	1.9462	5.37689	5.17381	3.39408	4.77463	3.07584	4.99547	4.95535	5.23192	3.52065	5.10903	4.89744
SIGLEC15	3.618	4.84805	3.44953	3.01399	4.4635	3.24255	4.11644	3.13336	3.90389	3.44434	4.15409	2.8677	4.54577	4.67628	4.2046	4.3966	4.45744	4.55557	1.9385	1.96301	2.02528	4.50447	5.6831	5.12182	3.49879	2.91775	3.55091	3.96569	4.17783	3.89392	4.83479	3.10119	3.63064	4.13066	4.16123	3.03522	4.22945	3.6726	2.71501	4.50189	2.93985	4.13858	3.07584	3.77951	3.21438	3.59256	4.89272	4.64575	3.92554
ADAM20	3.33731	1.94309	4.28787	4.75294	4.70531	3.87261	3.77562	4.67748	1.95319	4.3133	4.56999	3.31415	4.07535	4.49176	3.74614	4.77301	3.12583	3.52413	4.87215	4.34285	4.57012	2.09185	1.93492	4.22093	4.2333	4.78986	1.99235	4.40592	3.60908	4.33927	4.50496	4.04224	3.35091	3.04222	4.43501	4.12249	4.6311	4.83271	4.50226	2.8303	4.60686	4.42873	4.58834	3.77951	4.15578	4.62168	4.52478	3.78821	3.29543
SCARNA10	4.55386	3.76773	3.73054	3.75463	3.81697	3.99593	1.91018	1.91687	3.55175	3.1688	3.30279	3.59428	2.87605	4.06802	3.46539	3.85914	3.75402	3.24469	3.26987	3.50591	2.02528	2.09185	1.93492	1.90676	4.87964	4.11812	3.83167	3.77023	3.32862	4.01564	1.88593	3.10119	3.63064	3.04222	3.94271	3.4973	4.22945	4.85705	4.15171	1.95988	3.39408	3.79801	3.07584	4.23514	3.69169	3.87218	3.72024	2.86145	3.57564
TPH1	5.26978	3.28928	2.98693	1.97415	1.93233	1.9685	3.49514	3.60751	3.55175	4.1879	3.30279	2.8677	2.87605	3.44411	3.94133	4.30479	3.98165	2.80323	3.74808	1.96301	3.66739	2.09185	1.93492	2.83973	5.24972	2.91775	1.99235	1.93755	3.95832	4.33927	3.89542	3.56604	3.82961	4.42223	4.06248	1.97323	4.7724	1.9462	3.40523	2.8303	3.67499	3.99251	3.81979	2.85306	3.69169	3.12125	3.24311	3.58965	4.51832
C3orf43	1.90756	1.94309	3.92657	3.47352	3.96802	3.99593	4.11644	1.91687	4.68941	3.1688	3.78158	1.92734	2.87605	3.72499	3	4.1925	3.12583	3.24469	2.83132	3.04216	3.66739	2.09185	1.93492	4.35767	3.77894	3.64917	3.83167	3.77023	3.32862	3.74168	4.22638	2.00993	3.98136	1.93815	2.86137	3.4973	2.84719	4.51092	3.60463	3.26485	4.32329	1.929	3.81979	3.77951	3.96772	5.19609	4.09827	4.05996	3.29543
NLRP9	4.18513	1.94309	3.73054	1.97415	3.3381	4.09811	3.02787	2.71364	4.02626	2.74558	3.30279	4.32213	3.32509	3.44411	4.08826	3.85914	3.12583	3.72323	4.28311	4.12998	2.02528	2.09185	1.93492	3.56486	5.09569	3.64917	3.08578	3.48943	3.80745	4.27495	4.33768	3.8469	4.28729	4.13066	4.16123	4.23987	4.55837	3.39172	3.98721	3.26485	4.71917	3.05002	4.16341	3.58093	3.69169	1.9512	3.72024	3.93938	3.92554
HAR1B	3.81606	4.83326	3.73054	3.01399	4.5591	3.71919	5.51839	3.72785	3.27328	4.49772	3.58274	4.38583	4.54489	1.89913	1.9036	3.10641	3.12583	4.37771	3.26987	3.78684	2.02528	2.09185	3.92144	3.84109	4.40689	4.78986	3.55091	4.22956	3.32862	4.33927	4.22638	4.04224	3.82961	1.93815	3.94271	3.03522	3.29573	1.9462	3.75895	1.95988	4.7805	3.19059	2.00463	4.05141	1.91913	3.59256	2.81055	4.24356	4.63268
MYT1	4.7287	3.28928	4.1916	1.97415	2.88928	3.51959	4.32696	4.33252	1.95319	4.97934	3.78158	3.94441	3.80398	5.22258	3.74614	4.53998	3.40036	4.73495	4.12367	3.50591	2.02528	2.09185	4.25413	4.46493	5.19944	4.49158	1.99235	3.96569	3.60908	2.822	4.08505	3.8469	4.65761	3.78903	3.94271	1.97323	4.14547	3.6726	4.95295	2.8303	5.56302	5.03813	3.07584	4.05141	1.91913	3.12125	3.24311	3.78821	4.5977
LOC149134	5.48377	3.28928	4.9723	4.1	4.51373	4.9613	3.77562	4.42459	1.95319	4.3133	5.20699	4.24944	1.91747	4.85667	5.67859	4.47376	5.15167	4.4288	4.61986	3.04216	2.02528	2.09185	4.36611	3.91532	5.60131	4.88548	1.99235	3.96569	4.62745	4.60987	5.47749	4.40142	5.33314	3.50842	5.64108	1.97323	5.02674	4.85705	4.07537	3.54301	5.46744	4.34892	4.95461	4.47784	3.21438	5.16989	4.18462	3.93938	3.92554
PHACTR3	6.35483	5.35885	5.87883	5.43798	4.73535	5.78908	4.9807	5.716	3.75112	6.18564	4.15409	4.38583	4.45018	5.70547	4.44962	4.77301	5.03952	4.98138	4.76474	4.24687	2.02528	2.09185	3.16844	4.22093	4.82737	5.02637	4.29036	4.47524	4.94253	4.64276	5.92248	4.66523	6.00608	3.78903	4.78285	3.03522	4.47164	4.83271	4.07537	4.28019	5.4635	4.34892	5.82444	5.03444	3.96772	3.59256	3.99637	4.91017	3.77426
FOXL2	4.459	5.9823	4.95337	5.95465	5.82069	5.61938	5.76239	4.74441	5.48628	5.93024	1.92328	6.03952	5.76731	5.53736	5.59093	5.41157	5.90697	5.70072	3.90057	4.49323	6.03325	6.3152	5.80757	5.87533	4.85439	5.62559	5.15997	3.48943	5.6094	4.27495	5.43776	2.00993	5.30112	3.78903	5.89652	5.88178	5.97381	4.13991	5.09477	5.38941	3.67499	4.13858	3.53889	6.04039	4.89619	5.35316	5.85764	5.33542	5.20087
NPSR1	5.15418	5.41986	4.602	4.67623	4.18777	4.75032	3.77562	4.53638	4.21328	3.79783	3.30279	1.92734	2.87605	4.49176	4.50999	4.89507	6.04934	4.18284	5.04997	4.55397	4.39818	2.09185	3.92144	2.83973	4.40689	3.84738	4.38593	3.96569	4.07861	2.822	6.19711	3.56604	1.97841	3.04222	5.66975	4.12249	4.22945	4.60531	4.50226	4.54455	4.9233	1.929	3.81979	4.3712	3.21438	4.8004	3.99637	3.58965	1.90037
PLIN1	1.90756	1.94309	3.44953	5.50249	3.3381	4.18486	5.27304	4.07721	4.81733	4.7089	3.30279	4.32213	3.60551	4.85667	4.6935	4.53998	4.94279	4.09764	3.54873	3.98257	2.02528	2.09185	4.53461	3.56486	4.91467	3.99806	3.08578	3.02487	4.45306	3.89392	5.208	3.10119	4.48094	3.78903	4.93761	4.48753	4.47164	3.87038	3.88357	3.54301	3.67499	4.42873	3.07584	4.47784	3.21438	3.59256	4.32473	5.83506	4.7233
RXFP1	4.40331	6.12276	3.92657	3.01399	1.93233	3.51959	3.77562	5.6225	4.35226	3.64387	3.78158	4.998	2.87605	2.98019	1.9036	4.64881	4.98898	4.32061	3.26987	3.50591	5.77041	2.09185	4.25413	3.28494	4.47504	4.37271	4.38593	4.40592	2.87895	4.01564	4.72322	4.40142	3.35091	3.78903	4.48486	3.03522	4.55837	2.9381	4.15171	4.11976	1.94433	3.05002	3.07584	4.80273	3.21438	5.4459	3.24311	4.37947	4.04624
KCNJ10	3.81606	4.22772	4.86648	3.95132	4.85951	3.99593	5.01699	4.96193	3.55175	4.11223	4.95918	1.92734	4.50041	4.88017	4.6935	4.80726	4.96659	5.16815	3.26987	4.49323	4.79493	4.05762	4.53461	4.9992	5.12786	1.94704	5.19962	3.96569	3.80745	5.12949	5.06871	3.56604	3.63064	5.15258	4.16123	4.80422	5.02674	3.6726	4.33188	4.01819	2.93985	4.65749	2.00463	4.52342	3.21438	4.41686	4.4819	5.83041	5.46864
CHIT1	3.9665	5.92868	6.12484	5.24378	5.74704	3.51959	6.3109	4.97363	5.26481	3.79783	5.80627	5.77688	6.20529	6.36124	6.21042	5.23764	5.78614	5.36121	4.58416	4.94263	6.20435	5.72032	6.61868	5.58978	5.20918	5.80267	3.08578	4.75595	3.60908	5.74353	6.34118	3.10119	4.75582	6.06898	5.40376	6.05364	5.50204	4.51092	4.8042	4.85483	5.92143	6.07168	4.37669	5.70517	4.63551	5.03934	6.29561	5.779	5.61569
NDP	1.90756	4.75542	3.92657	4.1	3.3381	3.87261	4.2321	5.02713	4.46142	5.0753	4.05421	4.93594	4.97249	4.59347	3.74614	5.00724	4.61898	5.05178	3.90057	3.78684	2.02528	5.16865	5.69286	4.85495	5.08192	3.36863	4.02692	4.58941	4.17783	4.01564	5.26981	3.8469	4.53172	5.06852	5.19659	4.33629	4.59623	4.13991	5.11112	4.45506	1.94433	3.51752	3.53889	4.56482	3.21438	4.76226	4.43482	3.93938	4.47277
KCNC1	3.618	3.28928	1.91915	3.95132	1.93233	2.81296	4.32696	3.76174	4.21328	4.11223	1.92328	4.53847	3.60551	4.18488	3	3.58086	3.40036	3.99712	4.0227	3.78684	3.66739	2.09185	3.16844	4.35767	5.45008	2.91775	1.99235	3.48943	4.7523	3.74168	4.22638	3.10119	2.90638	3.04222	4.67486	1.97323	4.22945	4.32138	3.40523	3.26485	2.93985	3.79801	3.07584	3.93078	4.15578	3.87218	3.52065	3.78821	2.84807
IGSF22	5.61762	3.28928	4.07439	1.97415	4.7078	2.81296	4.2321	4.62709	3.27328	3.17211	2.8573	4.06858	3.80398	4.07193	4.92059	4.05321	4.7411	4.80316	4.02488	3.78684	2.02528	2.09185	3.92362	4.29655	5.09697	4.73464	3.55434	5.00622	4.66623	4.01564	4.50778	3.10119	2.90638	4.80755	5.07396	3.78059	4.22945	3.3951	2.71501	4.12067	4.86104	3.99251	4.16857	4.05467	4.40564	3.61304	2.81055	4.89326	5.06789
LOC729156	1.90756	3.90627	1.91915	4.33687	1.93233	4.69363	4.30666	3.04292	3.98021	4.29227	3.32294	4.51801	3.83234	4.23786	4.78558	3.49999	3.62696	3.69328	3.51797	4.588	4.9073	4.5209	4.30865	1.90676	4.43535	3.30802	4.34415	4.52256	1.91666	3.26999	1.88593	3.74276	3.34051	1.93815	4.40349	4.47897	3.23526	3.55709	3.79898	4.19781	3.45984	3.72302	4.10008	4.3036	1.91913	4.89264	4.41365	3.57325	3.37628
AR	5.21327	5.44982	4.1916	4.94588	4.51373	3.24255	5.45167	5.18483	4.91474	3.1688	5.28207	5.45519	4.74987	5.29219	4.6935	5.2744	5.59668	5.2301	4.71246	4.83875	2.02528	2.09185	4.25413	5.31006	5.26218	4.21709	5.21191	5.44846	4.5485	5.06	3.61807	5.18979	4.53172	4.2468	5.66688	1.97323	5.00129	3.87038	4.65385	4.45506	4.02267	5.95347	2.00463	5.50826	5.10946	4.95073	4.32473	4.57293	4.23001
PNMA3	4.18513	1.94309	4.49978	5.21388	4.18777	3.71919	4.47548	4.93736	3.90389	4.8144	3.93313	3.59428	4.39411	5.60546	4.72938	5.48805	4.49461	5.31712	3.26987	4.7386	4.79493	5.0089	4.95458	4.22093	5.40813	4.11812	3.83167	4.32529	4.39702	4.92911	5.53566	2.00993	1.97841	5.37764	5.18116	4.23987	5.26453	4.23828	4.38028	4.5837	4.56215	5.75063	3.81979	4.63772	4.15578	3.59256	4.72151	5.44793	5.22253
C5orf58	4.18513	3.28928	4.1916	4.1	4.67309	3.24255	3.77562	3.60751	3.27328	3.64387	4.67585	2.8677	3.95492	1.89913	4.2046	4.1925	5.02015	4.09764	1.9385	1.96301	2.02528	2.09185	3.92144	5.03707	4.47504	2.91775	3.08578	3.48943	2.87895	4.94449	4.72322	4.482	2.90638	4.13066	4.06248	3.03522	5.45838	3.6726	2.71501	4.01819	4.02267	4.49728	3.07584	2.85306	4.49546	1.9512	3.72024	4.89216	4.36608
C10orf107	4.26854	4.22772	4.07439	1.97415	3.61849	3.51959	4.32696	4.33252	3.27328	3.44434	3.58274	3.79302	3.80398	4.71236	4.08826	3.10641	3.75402	4.09764	3.90057	3.50591	2.02528	2.09185	4.11194	4.03637	5.32791	1.94704	3.83167	4.53581	5.12342	4.94449	3.89542	2.00993	3.82961	4.49121	4.16123	1.97323	3.77455	2.9381	3.60463	1.95988	2.93985	3.05002	2.00463	4.67012	4.15578	1.9512	1.95233	3.30932	4.7233
KLRC2	3.81606	4.3657	5.08185	1.97415	4.70472	3.71919	4.91572	2.83006	3.27328	3.44434	4.89159	4.09508	5.17978	4.77636	5.47015	4.30479	4.85555	4.65892	3.90057	3.50591	4.6964	5.0089	3.16844	4.13635	4.61848	4.40521	4.90787	4.11291	4.90143	4.62167	5.31926	3.56604	3.63064	5.01761	3.31352	5.08587	5.08334	5.3504	3.60463	3.54301	3.39408	4.5828	5.25474	5.03921	3.96772	4.20942	3.52065	4.87331	4.09521
NPY1R	4.97736	3.76773	5.12151	3.47352	2.88928	4.52667	4.40684	4.74441	5.06876	5.49708	5.31658	4.16509	3.95492	1.89913	3.46539	4.89507	4.06954	5.36527	4.65295	4.34285	2.02528	3.57965	3.64332	4.83496	5.51031	4.92586	4.29036	4.47524	5.10255	3.54254	5.08552	2.00993	4.97704	3.04222	4.60833	3.03522	4.59623	4.60531	1.93243	4.81275	5.04228	4.49728	2.00463	5.37063	4.92694	4.41686	3.72024	5.57174	5.1777
SOX2OT	5.84368	5.5924	5.97223	5.90087	5.46992	5.46774	4.11644	6.17893	4.77074	4.02474	5.5268	5.36062	4.33085	5.58127	5.85024	5.77074	6.4766	5.85444	5.64025	5.76377	4.39818	2.09185	5.92042	2.83973	6.02756	5.16969	4.38593	3.96569	5.26879	4.8414	5.97009	5.11504	5.75672	4.6953	6.19184	5.67693	4.91223	5.31086	5.98372	5.00291	4.80811	4.49728	5.06027	5.93359	4.49546	5.47819	5.7564	4.73622	4.94686
RPS26P11	1.90756	1.94309	4.07439	4.21806	3.61849	3.51959	3.02787	2.71364	3.27328	2.74558	1.92328	3.31415	3.80398	2.98019	4.08826	3.10641	3.87835	3.24469	1.9385	3.50591	3.66739	4.74055	3.64332	3.28494	3.49879	3.36863	1.99235	3.77023	3.80745	2.822	3.14209	3.8469	3.35091	1.93815	3.31352	3.97446	2.84719	4.51092	3.13143	2.8303	1.94433	1.929	5.04137	1.90476	3.21438	4.49539	4.25929	4.15945	4.77438
CHST8	4.69896	3.76773	5.06906	4.21806	4.18777	4.56615	4.58843	3.13336	4.55051	5.61096	4.64329	3.59428	4.1746	4.18488	4.3805	4.69445	3.59982	4.95451	5.11444	4.4237	2.02528	2.09185	3.92144	4.55237	4.87964	4.88548	1.99235	5.10098	3.32862	4.57434	5.06871	3.56604	4.28729	3.50842	4.84832	4.48753	4.79568	4.68341	4.87057	4.01819	2.93985	3.99251	5.17076	4.3077	4.92694	4.49539	4.25929	4.61084	5.15278
CDR1	4.11583	4.76361	1.91915	4.1319	4.02162	3.71919	4.90768	4.32281	2.83619	3.74943	4.43191	4.11739	5.08906	3.45779	1.9036	3.85914	4.25235	4.24729	4.12367	3.78684	2.02528	2.09185	4.70087	4.49743	5.03653	4.29991	3.83167	4.27383	2.87895	2.822	3.14209	2.00993	4.34304	3.04222	3.33708	1.97323	3.73392	3.39172	4.10249	3.54301	1.94433	1.929	2.00463	4.16977	4.29564	1.9512	3.24311	4.53151	3.85605
DNAH6	5.47739	4.04178	2.98693	4.96717	4.51373	5.32301	4.47548	5.09077	4.65855	3.92182	4.15409	4.0653	3.95492	5.29219	4.3805	3.85914	4.59098	4.47496	4.40516	3.50591	2.02528	2.09185	4.36611	4.62572	5.45223	3.36863	3.55091	3.48943	5.26879	5.40781	4.9466	2.00993	3.35091	3.50842	5.25816	4.12249	4.69343	5.60663	4.2784	4.40322	3.67499	4.25416	4.52748	5.45097	4.29564	1.9512	2.81055	4.53151	5.29131
UNC5C	5.11508	5.36836	4.07439	4.58348	4.6004	3.51959	5.44259	5.07372	3.90389	3.79783	4.8724	4.79528	5.33703	3.92061	4.89622	4.1925	5.08385	4.4288	4.0227	1.96301	4.87504	2.09185	5.25459	5.71813	4.65592	4.54154	5.09897	5.23799	4.17783	4.4475	3.61807	3.10119	3.98136	4.60468	4.06248	4.41758	4.74774	3.6726	3.98721	4.01819	3.39408	4.80738	2.00463	4.93608	4.57086	4.49539	4.09827	4.81057	4.79772
GALNT9	5.21327	3.28928	3.73054	3.47352	3.3381	4.56615	4.81626	3.60751	3.90389	5.02514	4.15409	4.61807	3.32509	4.18488	3.74614	4.59777	4.21245	3.87538	2.83132	3.50591	2.02528	2.09185	3.64332	3.91532	4.40689	3.36863	3.08578	3.96569	1.91666	3.54254	4.76395	3.8469	3.35091	3.78903	4.67486	3.97446	4.79568	1.9462	4.07537	3.26485	4.24029	4.25416	4.52748	3.30059	3.96772	1.9512	1.95233	2.86145	3.77426
MYOZ1	4.459	4.75542	5.31781	3.95132	4.93687	5.32824	6.31777	4.3807	6.38513	4.45773	4.76086	4.88169	4.92326	3.72499	4.3805	4.3966	5.04886	5.00639	5.13357	3.78684	3.66739	2.09185	5.02567	6.19445	5.21864	5.23209	5.95142	4.68059	3.80745	4.64276	5.14556	4.40142	4.48094	4.49121	5.49768	4.48753	1.89203	5.08262	2.71501	4.61971	5.22089	3.05002	4.80975	4.84571	6.1594	6.56399	5.53231	4.73622	4.42237
C11orf20	4.89208	4.04178	3.73054	4.21806	4.5591	5.13602	4.91866	4.59828	4.35226	5.49916	4.05421	4.0653	4.97249	2.98019	4.08826	3.68943	3.87835	4.9998	3.74808	3.98257	6.1576	2.09185	4.53461	3.66779	4.27118	4.99576	4.98272	5.15304	4.97456	4.73508	5.05107	5.07684	4.42429	5.24651	4.48486	1.97323	4.6482	4.90189	2.71501	5.1849	5.02744	3.05002	5.38928	4.52342	5.05131	4.76226	4.44465	1.91031	5.06753
IL17B	3.9665	4.04178	4.1916	3.47352	2.88928	3.87261	3.49514	2.71364	4.46142	4.36622	2.8573	4.0653	3.80398	2.98019	3.74614	3.10641	3.59982	3.72323	4.97145	1.96301	4.39818	4.63693	1.93492	4.13635	3.02964	5.49952	3.83167	3.02487	2.87895	4.57434	3.89542	4.18931	3.35091	3.50842	3.31352	3.4973	3.29573	3.6726	4.2784	1.95988	4.80811	3.05002	5.29475	3.30059	4.49546	3.87218	3.24311	3.58965	2.84807
SPSB4	5.21327	4.9233	4.91236	1.97415	5.47682	3.24255	5.20069	5.08237	4.97829	5.72311	3.30279	5.07501	5.4951	3.44411	5.92586	5.28297	5.01005	5.00639	4.28311	4.24687	4.39818	5.34484	5.13605	5.50424	5.27803	4.88548	4.1739	4.75595	3.32862	3.89392	4.57048	2.00993	4.75582	5.38377	5.29891	4.65104	5.19762	4.45549	5.88236	3.74254	4.02267	4.55717	3.81979	5.02192	4.49546	5.19609	4.60029	5.33034	4.55974
LOC145837	5.02049	4.04178	4.1916	3.95132	3.3381	3.24255	3.97022	3.40816	3.27328	4.25433	4.15409	3.79302	1.91747	3.72499	3.74614	3.10641	1.91133	3.72323	4.20921	3.50591	3.66739	2.09185	3.16844	3.56486	4.53449	4.66543	3.08578	3.77023	3.80745	3.26321	3.89542	3.10119	2.90638	4.2468	4.16123	1.97323	4.14547	1.9462	3.88357	3.89549	2.93985	4.61014	2.00463	3.30059	3.69169	4.20942	3.24311	4.31603	1.90037
FAM19A3	3.81606	1.94309	3.44953	3.01399	4.2717	3.51959	3.77562	1.91687	5.45667	5.14319	3.58274	3.94441	3.32509	2.98019	3.46539	4.77301	3.59982	4.51703	2.83132	3.50591	4.79493	2.09185	4.11194	4.46493	4.81313	2.91775	4.46645	1.93755	3.32862	1.91419	4.22638	4.04224	3.35091	3.78903	3.59417	3.4973	3.92561	3.39172	4.15171	4.01819	2.93985	3.05002	3.53889	1.90476	4.7862	3.87218	4.18462	4.43573	3.29543
HIST1H2AD	4.29999	3.4586	4.08214	5.0213	5.42907	5.11065	4.47035	4.5994	4.85237	4.26296	1.92328	3.92532	4.82824	4.46901	3.57435	1.88175	3.53996	4.09023	1.9385	2.3779	4.78691	2.09185	3.8938	4.53367	2.99007	4.43097	4.7023	3.66071	3.50171	3.84912	1.88593	3.76908	4.31926	1.93815	4.21527	4.49142	4.27983	4.71648	4.27726	4.49653	4.46769	3.78412	4.39144	3.76917	4.37615	4.49177	5.05055	4.58346	4.47848
PTPRN	5.83194	5.27014	4.07439	4.46744	5.65254	4.7245	5.91791	4.80206	5.25829	4.65807	4.80924	5.70372	5.61613	4.06802	4.2046	5.38873	5.16507	5.08234	4.83253	4.4237	5.20097	2.09185	5.73663	5.68211	5.00354	5.58884	4.38593	4.11291	4.39702	4.01564	4.22638	5.68953	4.75582	4.83364	3.31352	3.77828	5.71071	4.32138	5.41019	4.68418	3.87268	1.929	4.28053	3.93078	5.31589	5.16989	4.4819	4.98913	4.23001
FAM90A1	5.71077	5.39521	5.80201	6.01016	5.22393	3.24255	5.22976	3.76174	3.27328	3.1688	5.55219	5.34575	4.80074	4.80498	5.46732	5.26561	5.42737	5.21074	6.02442	4.12998	4.13978	3.57965	4.70912	5.24598	4.44216	5.19785	3.83167	4.32529	4.17783	5.67662	5.74798	4.61172	5.70081	4.34202	4.93761	1.97323	4.98788	5.08262	3.88357	3.74254	5.36549	5.16672	5.39862	4.3712	4.86283	5.23192	3.72024	4.91017	4.99051
LOC342346	1.90756	4.04178	2.98693	3.95132	3.81697	2.81296	3.97022	3.76174	1.95319	3.1688	3.58274	4.95244	4.1746	4.96194	3	4.47376	3.40036	3.72323	1.9385	1.96301	2.02528	2.09185	3.64332	3.91532	3.77894	2.91775	1.99235	4.32529	3.80745	4.20142	3.14209	3.56604	2.90638	1.93815	4.06248	3.77828	4.04609	3.87038	2.71501	2.8303	3.67499	4.25416	2.00463	4.3712	1.91913	4.41686	4.09827	4.24356	3.92554
FER1L6	3.33731	6.06138	4.62473	5.91698	5.00117	4.32554	4.89546	5.97321	5.10158	4.68423	5.31658	4.96823	5.40663	5.77652	5.04408	5.50431	5.84118	5.47778	5.10429	4.9191	4.57012	2.09185	5.42202	5.18967	4.2826	5.67616	4.38593	5.74211	6.14178	5.08097	5.32922	4.86464	4.77973	1.93815	5.69978	4.80422	5.74965	4.45549	5.24753	5.45191	5.51761	5.55654	3.07584	6.00082	6.02452	5.95046	4.56407	5.36417	5.29688
TTC23L	5.32324	4.22772	3.73054	4.46744	2.88928	4.66769	1.91018	4.15321	2.83619	3.92182	3.78158	4.65317	3.32509	4.63686	4.56339	4.1925	4.37322	3.72323	4.54537	3.50591	2.02528	2.09185	3.92144	3.56486	5.311	2.91775	3.08578	3.48943	4.6944	4.11626	4.42858	2.00993	4.61935	4.65233	4.75841	1.97323	4.51706	4.45549	3.40523	4.28019	4.02267	4.55717	2.00463	4.42747	1.91913	4.41686	4.38278	3.78821	4.04624
TF	3.9665	4.9233	6.04237	4.1	5.5565	6.30374	5.04994	6.2778	3.27328	5.29038	5.94839	5.44447	3.60551	5.87369	5.99091	5.8041	5.30669	6.34721	6.33147	5.8313	4.87504	5.96832	3.92144	4.41428	5.41064	5.77926	4.02692	5.55414	6.3446	6.2115	5.01283	4.71307	6.30142	4.73441	5.95066	6.0078	5.3791	6.24454	5.56677	5.97355	6.13822	5.25064	6.12079	6.35374	6.08008	6.22625	5.39896	5.0541	5.81173
DUSP13	4.18513	5.19892	5.42839	3.01399	5.56409	4.97591	5.74541	3.13336	5.97785	3.1688	5.59058	5.43706	5.22539	5.49205	5.04408	5.20696	4.69378	5.09196	5.56289	5.22877	3.66739	5.84164	4.8985	5.79274	4.40689	5.47471	5.50189	4.53581	3.80745	5.34102	4.33768	5.46576	5.18036	3.78903	3.59417	3.97446	4.55837	4.02043	5.10303	4.20586	5.28393	4.42873	4.77355	4.95184	5.65866	6.22219	5.23311	4.57293	3.77426
GRB14	4.26854	3.28928	5.76483	5.38766	4.2717	5.19541	4.91866	5.15165	5.30711	4.99133	2.8573	5.03854	4.07535	4.36154	5.38448	4.53998	5.1964	4.87743	5.77075	5.36851	4.87504	5.32454	4.79564	5.47267	3.88359	5.08083	3.55091	4.68059	4.6944	4.01564	5.70555	6.03075	5.67787	4.2468	5.47475	4.33629	4.85831	5.44259	4.21878	3.89549	5.81992	4.91676	5.02144	5.10152	4.86283	5.52076	5.62063	2.86145	4.66505
SYT5	5.1633	4.56236	4.36901	4.31511	6.02483	4.75032	5.54892	5.38483	4.40984	5.72831	4.37535	4.49279	5.97755	4.71236	4.79299	5.86093	3.98165	5.34865	5.21577	3.50591	4.79493	2.09185	5.68557	3.56486	4.40689	5.04077	4.53565	4.8198	5.34375	4.49371	5.24041	4.40142	1.97841	3.50842	4.16123	4.8909	5.88171	4.68341	4.53684	3.26485	4.24029	4.13858	4.73398	4.3077	3.69169	3.59256	3.24311	2.86145	3.92554
RSPH10B2	4.59484	1.94309	2.98693	3.95132	1.93233	4.85995	3.02787	4.701	1.95319	3.79783	3.78158	1.92734	2.87605	4.71236	3.94133	1.88175	4.06954	4.09764	4.12367	3.50591	2.02528	2.09185	3.64332	3.76371	4.91467	3.99806	3.08578	3.77023	5.03136	5.00036	4.62763	3.8469	4.10254	3.50842	4.73239	1.97323	4.8385	4.77921	3.75895	3.26485	4.02267	3.99251	4.45775	5.13074	3.21438	3.59256	2.81055	3.58965	4.87944
FIGN	4.66693	4.88746	5.21641	3.47352	5.5565	4.56615	5.34498	5.57231	5.74042	5.67052	4.73438	5.02552	5.74496	4.67628	3.46539	4.73563	5.01005	5.24836	4.61986	3.50591	4.57012	2.09185	4.86705	5.71694	5.52393	4.54154	5.90757	5.35449	5.6094	4.49371	4.76395	5.3483	4.57758	5.71497	5.62798	5.54144	5.80764	4.80685	4.21878	5.79388	4.60686	5.68299	4.69048	5.02192	6.01928	4.06497	3.72024	4.81057	5.63965
TMOD4	3.33731	1.94309	4.49978	4.21806	3.96802	3.87261	5.99279	2.71364	6.15437	3.1688	3.93313	1.92734	4.25854	3.72499	3	3.10641	3.87835	4.4288	2.83132	3.50591	4.99952	2.09185	3.16844	5.92461	4.81313	4.21709	5.62171	3.77023	4.07861	3.89392	4.33768	3.8469	2.90638	3.50842	3.79225	4.23987	3.29573	2.9381	3.40523	4.01819	4.02267	3.51752	4.01569	4.15098	5.96354	6.27525	4.81595	4.31603	4.1458
SLC8A2	5.14482	5.43522	5.31781	3.47352	5.58335	5.21064	5.01699	5.08237	4.94785	5.91492	4.05421	3.31415	5.8189	4.83164	5.53763	5.64267	5.11566	5.45808	5.60923	4.86739	4.39818	2.09185	5.28618	4.55237	4.69633	5.67792	3.83167	4.32529	4.82631	4.79996	5.39164	5.06137	4.36036	4.49121	4.37931	5.31772	5.35761	5.59694	4.97686	3.26485	6.09351	4.55717	5.49676	4.42747	3.69169	4.20942	3.87339	3.93938	1.90037
ENTPD8	5.70673	4.56236	5.79639	4.8995	4.18777	5.06472	4.32696	4.46486	1.95319	4.85001	5.09934	1.92734	4.72189	5.21382	4.08826	4.1925	3.87835	5.623	5.22299	4.24687	4.57012	5.30293	3.64332	4.13635	3.30008	5.30465	3.83167	4.22956	5.70403	4.86058	4.33768	6.1021	4.61935	1.93815	4.24464	3.97446	4.59623	5.85682	4.56907	5.07684	4.97897	3.05002	5.09541	5.76017	5.34319	4.06497	2.81055	4.70816	3.77426
ALDOB	4.18513	4.04178	1.91915	4.1	1.93233	4.25981	3.02787	2.71364	3.27328	1.93246	3.93313	3.31415	1.91747	4.43104	4.93905	4.04994	2.70643	3.24469	4.78858	4.12998	2.02528	2.09185	3.16844	3.56486	5.00354	3.99806	3.55091	4.58941	2.87895	4.01564	3.14209	3.56604	4.10254	5.48538	4.16123	3.03522	3.57604	4.23828	3.98721	3.26485	5.56579	4.13858	3.07584	3.77951	4.15578	4.06497	2.81055	3.93938	4.30254
PPYR1	3.9665	4.47396	3.44953	4.21806	4.90009	5.12677	5.13357	3.40816	5.22357	5.3942	5.04227	4.65317	4.07535	3.44411	4.50999	4.30479	4.06954	4.85995	4.40516	3.50591	5.04953	2.09185	3.92144	4.51069	4.61128	4.62781	5.37872	5.20861	4.7523	4.20142	3.14209	3.8469	2.90638	5.15258	4.70458	5.30977	5.02674	3.6726	3.75895	5.29936	5.01197	4.83766	2.00463	3.58093	4.98181	4.76226	4.38278	5.46797	4.7233
CLDN18	4.08637	5.18264	4.78579	1.97415	4.4635	5.07585	4.32696	4.07721	4.21328	4.92715	5.39332	4.68564	3.80398	4.28074	4.2046	4.04994	4.79491	4.80231	4.78858	3.78684	4.13978	2.09185	4.45767	4.35767	5.20435	4.37271	3.08578	5.0228	3.80745	4.82119	4.08505	3.56604	4.78415	4.88847	1.88259	3.4973	4.74774	6.15882	4.82183	4.11976	5.49003	3.05002	5.29475	4.75464	3.69169	4.06497	3.72024	1.91031	5.34763
KCTD19	3.9665	3.28928	3.73054	3.47352	1.93233	3.51959	1.91018	3.13336	2.83619	4.56877	3.58274	3.79302	3.60551	3.72499	3.74614	4.04994	4.49461	3.24469	2.83132	1.96301	4.13978	2.09185	3.64332	2.83973	4.76709	1.94704	3.08578	3.02487	2.87895	3.54254	4.57048	2.00993	3.98136	1.93815	4.16123	3.03522	4.4214	3.6726	3.13143	1.95988	2.93985	4.42873	2.00463	4.05141	3.69169	1.9512	3.24311	4.24356	3.77426
PP14571	5.15418	4.22772	5.25929	4.71628	4.2717	5.93021	3.97022	5.02713	4.12747	4.95416	5.42158	4.68564	3.32509	4.59347	5.1484	4.64881	4.97797	5.19715	5.90777	4.12998	2.02528	2.09185	4.53461	5.21194	4.86723	4.21709	3.08578	4.40592	5.82239	5.71172	4.22638	5.30339	4.48094	4.13066	4.31651	3.97446	4.30188	5.27613	4.33188	4.20586	4.88115	4.42873	4.84313	4.52342	5.47482	3.12125	4.72151	3.30932	5.62102
CPA5	1.90756	3.28928	4.908	1.97415	1.93233	3.78817	3.86891	3.40816	3.27328	3.44434	4.10438	1.92734	3.74488	4.3533	5.04363	3.34359	3.68903	3.40869	4.52851	1.96301	4.74841	2.09185	4.58816	4.26802	4.12339	5.05951	4.08422	4.62398	3.32862	5.09348	1.88593	3.8469	1.97841	3.78903	3.94271	3.03522	4.49125	4.20201	2.95249	4.19376	3.31818	4.58706	3.07584	3.30059	1.91913	3.12125	2.89148	4.13811	4.9524
ISM2	5.29467	4.6365	4.9723	4.92338	5.02957	4.66769	4.2321	5.49955	4.12747	5.23095	4.90951	5.2963	4.07535	5.37652	5.51498	4.04994	5.2612	5.17565	5.7283	5.86065	4.6964	2.09185	4.45767	5.56705	5.23233	4.62781	4.02692	3.02487	4.88876	4.01564	5.45333	5.22803	5.41806	5.24921	5.72337	3.97446	5.13197	5.69473	4.91396	3.89549	4.02267	5.76278	4.77355	4.90241	3.21438	5.18324	5.41462	4.15945	4.7233
LRRC69	5.43943	4.56236	4.28787	5.8016	5.35087	4.09811	4.2321	4.21998	5.23792	4.7089	4.48257	4.0653	5.27358	3.92061	5.1484	5.20696	5.01005	4.7098	4.28311	3.78684	4.39818	5.0089	5.00345	4.46493	5.17371	5.15973	4.02692	5.15304	4.58971	4.01564	4.97006	5.02074	4.28729	3.50842	4.64285	4.23987	4.81768	1.9462	3.60463	1.95988	3.39408	5.23159	4.64224	4.7283	3.96772	1.9512	3.52065	4.24356	4.1458
ATP2B2	3.81606	4.22772	3.73054	4.31511	4.0884	1.9685	5.16881	4.46486	5.2162	4.7089	3.93313	1.92734	3.95492	4.54543	4.3805	4.89507	4.14564	4.82246	4.28311	3.50591	3.66739	2.09185	5.64859	5.14891	4.44216	3.84738	4.81569	4.32529	4.80309	3.89392	4.99207	3.56604	5.4917	4.83364	5.50847	4.23987	4.92864	3.87038	4.15171	3.89549	4.71917	4.13858	4.87398	3.30059	4.7417	5.70497	4.09827	4.24356	4.89744
KCNH8	5.9701	4.56236	4.9334	5.37526	4.34408	2.81296	3.97022	5.33787	4.21328	1.93246	5.13914	5.07501	3.80398	4.9431	5.15943	5.17303	5.49292	5.21733	4.54537	4.49323	2.02528	2.09185	5.33272	4.51069	5.84952	4.96243	1.99235	3.48943	4.86903	5.23643	5.31337	3.10119	5.44041	3.04222	5.68091	4.73439	3.29573	4.32138	5.10303	3.26485	5.01197	4.77463	5.37749	5.59602	3.21438	4.72029	4.4819	5.16512	5.30235
TTTY15	1.90756	1.94309	5.17749	1.97415	5.20799	6.11448	5.58432	2.71364	5.6146	4.41407	5.47102	5.66617	5.47945	5.88043	5.54679	1.88175	5.59203	1.89419	5.52606	1.96301	2.02528	5.39928	1.93492	5.91252	5.96096	4.81596	5.52497	3.48943	5.86204	5.16369	5.32922	4.86464	5.72498	5.13991	2.86137	5.04018	6.03092	5.1077	6.07156	5.92727	4.64757	6.14425	4.52748	5.38355	5.78784	4.89726	1.95233	5.84845	5.93734
DAND5	3.618	3.28928	2.98693	3.01399	4.0884	3.24255	3.02787	3.98932	3.75112	3.1688	3.30279	1.92734	2.87605	3.72499	4.08826	1.88175	3.12583	3.52413	2.83132	3.04216	4.39818	3.57965	1.93492	2.83973	3.97281	3.36863	3.08578	3.77023	3.60908	3.26321	4.33768	2.00993	4.48094	3.04222	4.06248	3.03522	4.4214	4.45549	4.72491	3.89549	4.14201	3.51752	3.07584	4.42747	3.21438	4.56284	3.87339	3.78821	3.92554
IL1F8	4.459	5.08707	5.47911	3.95132	2.88928	5.59746	1.91018	4.33252	4.50808	4.68423	5.3055	3.79302	4.74987	4.80498	4.89622	5.0439	4.529	4.96818	4.61986	5.62314	5.84162	3.57965	4.83293	5.73545	1.89017	5.29807	1.99235	5.78287	5.03136	5.35915	4.86595	5.75168	4.94155	3.50842	4.67486	3.4973	4.22945	5.1077	5.03072	4.5837	5.93784	1.929	5.37749	4.3712	3.21438	4.8004	5.24644	5.14745	4.66505
TMEM200C	5.26978	5.08707	3.73054	5.37526	4.34408	3.71919	4.96116	4.98496	2.83619	4.89808	4.05421	3.31415	4.9404	4.85667	5.33856	4.73563	4.32503	5.10133	4.20921	4.77472	2.02528	2.09185	5.08512	4.85495	5.36204	4.54154	3.08578	5.05614	4.33387	4.64276	4.67812	3.56604	3.63064	5.32366	4.88659	3.4973	3.92561	2.9381	5.45943	4.01819	3.39408	4.80738	2.00463	4.84571	4.49546	4.20942	4.09827	4.73622	5.1613
DTHD1	2.88546	5.27014	3.73054	4.46744	4.63822	4.8195	4.91866	4.56837	3.90389	3.44434	4.92681	4.0653	4.90533	5.24753	4.30003	4.73563	3.59982	4.82246	4.34776	4.7386	4.57012	2.09185	4.60063	4.13635	4.05025	4.73217	3.83167	4.58941	5.28774	5.45912	4.08505	5.20304	5.1992	4.88847	4.78285	4.12249	4.6311	3.87038	3.40523	3.54301	5.58957	4.70021	3.53889	5.67372	4.15578	4.56284	3.72024	5.07712	5.10663
AMTN	1.90756	6.67688	5.23423	5.27988	6.57772	3.99593	6.42853	5.95852	5.03269	5.52971	5.12961	6.67136	6.11913	5.80898	6.47392	5.829	4.71604	5.7231	5.16889	5.73519	3.66739	5.43107	6.41636	5.75163	6.42341	6.10586	1.99235	5.10098	5.86906	2.822	5.62664	5.62857	5.93664	6.41188	5.73347	5.81886	5.84803	2.9381	6.02981	5.32708	5.51761	4.34892	4.37669	5.90769	6.02337	6.42794	1.95233	6.11453	5.91606
[truncated: 1,495 more rows]
[truncated: 50 more columns]
