# Supplementary material for: Characterization of long non-coding RNA and messenger RNA profiles in laryngeal cancer by weighted gene co-expression network analysis
Source: Aging (Albany NY). 2019 Nov 18;11(22):10074–99. doi: 10.18632/aging.102419 (PMC6914418; doi:10.18632/aging.102419)
Supplement: Supplementary Table 3 [file aging-11-102419-s002..xlsx]

## Sheet: Sheet2
Supplementary Table 3. The clinical characteristics of these LC patients(NA represents the missing data).
sample ID	age at initial pathologic diagnosis	history of smoking	history of alcohol consumption	intermediate dimension	lymph node count	neck lymph node dissection	pathologic N	radiation therapy	targeted molecular therapy	tumor status	success of follow-up treatment	EVENT	OS
TCGA-CR-7398	53	40	YES	0	23	YES	N0	NO	NO	TUMOR FREE	Complete Remission/Response	0	156
TCGA-CR-7399	60	135	YES	0	57	YES	N2c	YES	YES	TUMOR FREE	Complete Remission/Response	0	181
TCGA-CR-7364	66	150	NO	0	36	YES	N0	NO	NO	TUMOR FREE	NA	0	1435
TCGA-CR-7371	45	60	NO	0	104	YES	N1	NO	NO	NA	NA	1	94
TCGA-CR-7389	55	34	YES	0	NA	NO	NX	YES	YES	TUMOR FREE	NA	0	392
TCGA-CR-7374	67	45	YES	0	NA	NO	NX	YES	YES	WITH TUMOR	NA	0	30
TCGA-CR-7402	68	108	YES	0	NA	NO	NX	YES	YES	TUMOR FREE	NA	0	911
TCGA-CR-7370	72	112	YES	0	NA	NO	NX	YES	NO	TUMOR FREE	NA	0	105
TCGA-CR-7388	70	110	YES	0	NA	NO	NX	NA	NA	WITH TUMOR	Persistent Disease	1	823
TCGA-DQ-7595	53	80	YES	0.2	NA	NO	NX	YES	YES	TUMOR FREE	Complete Remission/Response	0	1190
TCGA-BB-7870	58	40	YES	0.3	83	YES	N0	YES	NO	TUMOR FREE	Complete Remission/Response	0	2016
TCGA-BB-7864	61	80	YES	0.3	54	YES	N2c	YES	YES	TUMOR FREE	Complete Remission/Response	0	1527
TCGA-DQ-7589	70	100	YES	0.3	NA	NO	NX	YES	YES	TUMOR FREE	Complete Remission/Response	0	1409
TCGA-DQ-5629	64	63	YES	0.3	47	YES	NX	YES	YES	TUMOR FREE	NA	1	941
TCGA-CN-6997	66	80	NO	0.4	25	YES	N2c	YES	YES	TUMOR FREE	Complete Remission/Response	1	988
TCGA-CV-5431	73	NA	YES	0.4	29	YES	N2c	YES	NO	TUMOR FREE	Complete Remission/Response	1	522
TCGA-CV-5444	64	NA	YES	0.4	21	YES	N1	NO	NO	TUMOR FREE	NA	0	2437
TCGA-CV-5435	57	NA	YES	0.4	66	YES	N2b	YES	YES	WITH TUMOR	NA	1	2319
TCGA-CV-7101	80	NA	YES	0.4	0	NO	NX	NA	NA	TUMOR FREE	NA	1	160
TCGA-D6-6517	59	30	YES	0.4	3	YES	N0	NO	YES	WITH TUMOR	Stable Disease	0	292
TCGA-CN-4722	61	NA	NO	0.5	53	YES	N0	NO	NO	TUMOR FREE	Complete Remission/Response	0	1483
TCGA-BB-7862	67	90	YES	0.5	48	YES	N2c	YES	NO	TUMOR FREE	Complete Remission/Response	0	1117
TCGA-CV-5443	63	NA	YES	0.5	11	YES	N0	NO	NO	TUMOR FREE	NA	0	2784
TCGA-BA-6868	53	60	YES	0.5	NA	NO	NX	YES	YES	WITH TUMOR	Progressive Disease	1	472
TCGA-CN-5360	68	50	YES	0.6	54	YES	N0	YES	YES	TUMOR FREE	Complete Remission/Response	0	2169
TCGA-CN-4723	67	NA	YES	0.6	55	YES	N0	NO	NO	TUMOR FREE	Complete Remission/Response	0	1699
TCGA-CV-5430	61	NA	YES	0.6	9	YES	N2a	YES	NO	TUMOR FREE	Complete Remission/Response	0	4241
TCGA-CN-4735	52	120	YES	0.6	70	YES	N2b	YES	YES	TUMOR FREE	Complete Remission/Response	0	1737
TCGA-CN-6012	66	100	NO	0.6	35	YES	N2c	YES	YES	TUMOR FREE	Complete Remission/Response	0	1460
TCGA-BA-5555	54	62	YES	0.6	68	YES	N2c	NO	NO	TUMOR FREE	Complete Remission/Response	0	520
TCGA-CV-5432	68	NA	NA	0.6	65	YES	N0	NO	NO	TUMOR FREE	NA	0	3930
TCGA-CV-5441	58	NA	YES	0.6	62	YES	N2b	YES	NO	TUMOR FREE	NA	0	2886
TCGA-CV-7089	74	NA	YES	0.6	22	YES	N2c	NA	NA	TUMOR FREE	NA	1	1972
TCGA-CV-5978	53	NA	YES	0.6	55	YES	N3	NA	NA	WITH TUMOR	NA	1	215
TCGA-BA-6870	60	40	YES	0.6	NA	NO	NX	YES	YES	NA	NA	1	451
TCGA-CN-5363	48	15	YES	0.6	28	YES	N3	NA	NA	WITH TUMOR	Persistent Disease	1	253
TCGA-CN-6022	49	NA	NA	0.6	33	YES	N1	NO	NO	WITH TUMOR	Progressive Disease	1	281
TCGA-BA-4076	39	30	YES	0.6	NA	YES	NX	YES	YES	WITH TUMOR	Progressive Disease	1	415
TCGA-D6-8568	62	43	YES	0.7	3	YES	N0	NO	YES	TUMOR FREE	Complete Remission/Response	0	759
TCGA-CN-5355	64	40	YES	0.7	27	YES	N0	NO	NO	TUMOR FREE	Complete Remission/Response	0	1278
TCGA-CV-7418	62	60	YES	0.7	28	YES	N2b	YES	NO	TUMOR FREE	Complete Remission/Response	1	789
TCGA-CN-6988	47	40	YES	0.7	81	YES	N2b	NA	NA	TUMOR FREE	Complete Remission/Response	0	318
TCGA-CV-7410	61	38	NO	0.7	10	YES	N1	NA	NA	WITH TUMOR	NA	1	6417
TCGA-CV-7415	60	NA	NO	0.7	82	YES	N2c	NA	NA	WITH TUMOR	NA	1	695
TCGA-BA-4078	83	75	NO	0.7	52	YES	NA	YES	NO	WITH TUMOR	NA	1	276
TCGA-CN-4727	56	80	YES	0.8	37	YES	N0	YES	YES	TUMOR FREE	Complete Remission/Response	0	1560
TCGA-BA-6869	62	46	YES	0.8	80	YES	N0	YES	NO	TUMOR FREE	Complete Remission/Response	0	644
TCGA-CN-5356	56	NA	NO	0.8	97	YES	N0	NO	NO	TUMOR FREE	Complete Remission/Response	0	1409
TCGA-CN-6023	73	35	YES	0.8	31	YES	N2c	YES	YES	TUMOR FREE	Complete Remission/Response	0	1584
TCGA-CN-6010	53	67.5	YES	0.8	39	YES	N2c	YES	YES	TUMOR FREE	Complete Remission/Response	0	1523
TCGA-CV-7421	76	NA	NO	0.8	11	YES	N0	NO	NO	NA	NA	1	2
TCGA-CN-4738	53	72	YES	0.8	39	YES	N0	NA	NA	NA	NA	1	436
TCGA-CV-7242	60	40	YES	0.8	43	YES	N0	NA	NA	TUMOR FREE	NA	0	1095
TCGA-CV-5440	52	NA	YES	0.8	47	YES	N2b	YES	NO	TUMOR FREE	NA	0	3270
TCGA-CV-7248	63	30	NO	0.8	24	YES	N2c	NA	NA	TUMOR FREE	NA	1	521
TCGA-CV-7437	77	NA	NO	0.8	NA	NO	NX	NA	NA	WITH TUMOR	NA	1	506
TCGA-CV-7177	82	NA	NO	0.8	NA	NO	NX	NA	NA	WITH TUMOR	NA	1	663
TCGA-BB-4217	68	60	YES	0.8	51	YES	N2c	YES	NO	WITH TUMOR	Partial Remission/Response	0	187
TCGA-CN-4739	71	82.5	YES	0.8	54	YES	N0	YES	YES	WITH TUMOR	Progressive Disease	1	1394
TCGA-D6-6826	64	NA	NO	0.8	5	YES	N2b	NO	NO	TUMOR FREE	Progressive Disease	1	348
TCGA-CN-6989	64	50	YES	0.8	56	YES	N2c	YES	YES	WITH TUMOR	Progressive Disease	1	980
TCGA-CN-6992	61	90	YES	0.9	48	YES	N2b	YES	YES	TUMOR FREE	Complete Remission/Response	0	1066
TCGA-CV-6962	65	NA	NO	0.9	NA	NO	NX	YES	NA	TUMOR FREE	Complete Remission/Response	1	126
TCGA-CN-6021	63	60	NO	0.9	NA	NO	NX	NA	NA	WITH TUMOR	NA	1	276
TCGA-CV-7250	64	60	YES	1	48	YES	N0	YES	NO	TUMOR FREE	Complete Remission/Response	1	2900
TCGA-CV-7247	55	NA	NO	1	9	YES	N0	NA	NA	WITH TUMOR	NA	1	577
TCGA-CV-7261	57	41	NO	1	17	YES	N0	YES	NO	TUMOR FREE	NA	0	1512
TCGA-CV-7245	62	60	NO	1	46	YES	N0	NA	NA	TUMOR FREE	NA	0	797
TCGA-CV-7440	38	21	NO	1	NA	NO	NX	NA	NA	NA	NA	1	675
TCGA-CV-7422	60	80	YES	1	27	YES	N1	YES	NO	WITH TUMOR	Progressive Disease	1	1037
TCGA-CV-7433	49	16	NO	1.1	43	YES	N2b	YES	YES	WITH TUMOR	Progressive Disease	1	601
TCGA-CV-7424	67	50	NO	1.2	4	YES	N2b	NA	NA	WITH TUMOR	NA	1	453
TCGA-F7-8298	58	26	YES	1.3	14	YES	N0	NO	NO	TUMOR FREE	Complete Remission/Response	0	995
TCGA-CV-6935	67	NA	YES	1.3	4	YES	N2c	NA	NA	WITH TUMOR	NA	1	295
TCGA-CV-7430	56	40	NO	1.4	10	YES	N0	NA	NA	WITH TUMOR	NA	1	495
TCGA-D6-A6ES	50	NA	NO	NA	13	YES	N0	YES	NO	TUMOR FREE	Complete Remission/Response	0	389
TCGA-CV-A6K1	65	43	YES	NA	44	YES	N0	YES	NO	TUMOR FREE	Complete Remission/Response	0	685
TCGA-D6-A6EK	67	72	NO	NA	3	YES	N1	YES	YES	TUMOR FREE	Complete Remission/Response	0	875
TCGA-F7-7848	47	20	YES	NA	4	YES	N1	YES	NO	TUMOR FREE	Complete Remission/Response	0	1131
TCGA-CN-A49B	71	40	YES	NA	39	YES	N1	YES	NO	TUMOR FREE	Complete Remission/Response	0	904
TCGA-CN-A497	63	NA	NO	NA	69	YES	N1	NO	NO	TUMOR FREE	Complete Remission/Response	0	1065
TCGA-CN-5361	80	25	YES	NA	56	YES	N2a	NA	NO	TUMOR FREE	Complete Remission/Response	1	2120
TCGA-F7-A623	70	42	YES	NA	6	YES	N2b	YES	NO	TUMOR FREE	Complete Remission/Response	0	616
TCGA-CN-A641	47	15	YES	NA	70	YES	N2b	YES	NA	TUMOR FREE	Complete Remission/Response	0	367
TCGA-CN-A63T	60	46	YES	NA	80	YES	N2b	YES	YES	TUMOR FREE	Complete Remission/Response	0	225
TCGA-CV-A461	65	NA	NO	NA	21	YES	NA	YES	NO	TUMOR FREE	Complete Remission/Response	1	2064
TCGA-CV-A45Z	75	40	YES	NA	10	YES	N0	NO	NO	WITH TUMOR	NA	1	1466
TCGA-CV-A45Y	61	39	YES	NA	15	YES	N0	YES	NO	TUMOR FREE	NA	1	2703
TCGA-CV-A45W	75	NA	YES	NA	48	YES	N0	NO	NO	TUMOR FREE	NA	1	1398
TCGA-F7-A50I	72	0.9	YES	NA	NA	NO	N0	NA	NA	TUMOR FREE	NA	0	92
TCGA-CV-5434	60	NA	NO	NA	30	YES	N2b	YES	NO	TUMOR FREE	NA	1	3314
TCGA-BA-A6DA	41	25	YES	NA	87	YES	N2c	YES	NA	TUMOR FREE	NA	0	351
TCGA-BA-A6DI	62	40	YES	NA	NA	NO	NX	YES	NA	WITH TUMOR	NA	1	336
TCGA-HD-7229	60	NA	NO	NA	NA	NA	N0	YES	YES	WITH TUMOR	Progressive Disease	0	1027
TCGA-KU-A66S	69	50	NO	NA	7	YES	N1	YES	NO	WITH TUMOR	Progressive Disease	1	406
TCGA-CV-A460	72	51	NO	NA	80	YES	N2	YES	NO	WITH TUMOR	Progressive Disease	1	1838
TCGA-CR-6474	51	74	YES	NA	31	YES	N2b	YES	NO	WITH TUMOR	Progressive Disease	1	564
TCGA-F7-A622	75	NA	YES	NA	NA	NO	NX	NO	NO	WITH TUMOR	Progressive Disease	1	359
TCGA-D6-6824	61	40	YES	NA	25	YES	N0	NO	NO	TUMOR FREE	Stable Disease	0	77
