# Supplementary material for: Characterization of long non-coding RNA and messenger RNA profiles in laryngeal cancer by weighted gene co-expression network analysis
Source: Aging (Albany NY). 2019 Nov 18;11(22):10074–99. doi: 10.18632/aging.102419 (PMC6914418; doi:10.18632/aging.102419)
Supplement: Supplementary Table 7 [file aging-11-102419-s001..xlsx]

## Sheet: Sheet1
Supplementary Table 7. The coexpression and combined score between nodes base on String network in the co-expression pink module.
node1	node2	coexpression	combined_score
CFI	CFH	0.119	0.999
C1R	C1S	0.874	0.998
C1R	SERPING1	0.703	0.995
RSAD2	IFIT2	0.813	0.994
OAS1	IFI6	0.838	0.994
C1S	SERPING1	0.451	0.994
RSAD2	OASL	0.801	0.993
IFIT2	OASL	0.793	0.993
OAS1	RSAD2	0.796	0.993
RSAD2	OAS2	0.789	0.992
IFI6	OASL	0.78	0.991
IFI6	OAS2	0.774	0.991
RSAD2	XAF1	0.802	0.99
IFIT2	OAS2	0.681	0.989
RSAD2	IFI6	0.733	0.989
IFITM2	IFITM3	0.892	0.988
OAS1	IFIT2	0.664	0.987
XAF1	OAS2	0.783	0.987
XAF1	OASL	0.751	0.984
IFITM1	IFI6	0.566	0.984
XAF1	IFI6	0.741	0.984
OAS1	XAF1	0.733	0.984
IFIT2	IFI6	0.56	0.983
IFITM2	IFITM1	0.832	0.983
IFITM1	OAS2	0.525	0.983
HLA-G	HLA-C	0.099	0.981
IFIT2	XAF1	0.655	0.98
TRIM22	OAS2	0.556	0.975
OAS1	IFITM1	0.319	0.975
IFITM1	IFITM3	0.74	0.973
IFITM3	RSAD2	0.164	0.972
IFITM1	OASL	0.327	0.971
IFITM1	RSAD2	0.217	0.97
IFITM1	IFIT2	0.214	0.97
IFITM3	IFIT2	0.117	0.962
IFITM3	IFI6	0.201	0.962
OAS1	IFITM3	0.151	0.96
OAS1	OAS2	0.791	0.959
IFITM3	OASL	0.131	0.958
IFITM2	IFI6	0.158	0.956
IFITM3	OAS2	0.12	0.955
IFITM2	RSAD2	0.084	0.954
OAS1	TRIM22	0.254	0.954
IFITM1	XAF1	0.325	0.954
IFITM2	OAS1	0.109	0.952
SP100	TRIM21	0.154	0.951
TRIM22	OASL	0.162	0.95
OASL	TRIM21	0.329	0.949
OAS1	SP100	0.178	0.947
IFITM2	OAS2	0.097	0.946
IFITM2	IFIT2	0.093	0.945
OAS1	TRIM21	0.29	0.944
TRIM5	OAS2	0.159	0.944
OAS2	TRIM21	0.295	0.942
TRIM5	OASL	0.126	0.941
SP100	OAS2	0.246	0.938
IFITM2	OASL	0.09	0.938
OAS1	TRIM5	0.139	0.937
SP100	OASL	0.179	0.934
TRIM22	SP100	0.23	0.932
UBE2L6	TRIM21	0.231	0.928
IFITM3	XAF1	0.148	0.926
HLA-C	OAS2	0.097	0.918
TRIM5	HLA-C	0	0.916
TRIM5	SP100	0.134	0.916
OAS1	HLA-C	0.092	0.915
IFITM1	HLA-C	0.098	0.911
HLA-C	IFI6	0.092	0.91
DDX60	RSAD2	0.812	0.909
IFITM2	HLA-C	0.092	0.908
IFITM3	HLA-C	0.078	0.908
RSAD2	HLA-C	0.062	0.907
HLA-C	OASL	0.093	0.906
HLA-G	RSAD2	0.062	0.906
IFITM2	XAF1	0.099	0.906
HLA-C	TRIM21	0.09	0.905
HLA-G	OAS1	0.058	0.905
HLA-G	OASL	0.059	0.905
HLA-C	IFIT2	0.076	0.905
HLA-G	IFI6	0	0.904
HLA-G	IFITM3	0	0.904
IFITM2	HLA-G	0	0.904
HLA-C	SP100	0.075	0.903
HLA-G	IFITM1	0	0.903
HLA-G	XAF1	0	0.902
HLA-G	OAS2	0	0.902
HLA-G	SP100	0.054	0.901
HLA-G	IFIT2	0	0.9
HLA-G	TRIM5	0	0.9
HLA-G	TRIM21	0	0.9
HLA-G	TRIM22	0	0.9
HLA-C	XAF1	0	0.9
TRIM22	HLA-C	0	0.9
DDX60	OAS2	0.768	0.894
DDX60	IFIT2	0.74	0.872
OAS1	DDX60	0.726	0.86
DDX60	OASL	0.623	0.851
RSAD2	PARP12	0.632	0.824
DDX60	XAF1	0.74	0.821
OAS2	OASL	0.785	0.82
OAS1	OASL	0.785	0.81
OAS2	PARP12	0.731	0.8
OAS1	UBE2L6	0.68	0.799
DDX60	TRIM22	0.74	0.796
OAS2	UBE2L6	0.612	0.773
DDX60	IFI6	0.549	0.771
XAF1	PARP12	0.69	0.77
OAS1	PLSCR1	0.55	0.761
RSAD2	PLSCR1	0.522	0.75
TRIM22	XAF1	0.641	0.716
IFI6	UBE2L6	0.563	0.714
IL15	IL12RB2	0	0.705
UBE2L6	OASL	0.336	0.692
C1S	CFH	0.249	0.679
OAS1	PARP12	0.579	0.679
CFH	SERPING1	0.129	0.675
DDX60	PARP12	0.588	0.671
PARP12	OASL	0.563	0.658
DDX60	PLSCR1	0.554	0.658
C1R	CFH	0.225	0.656
XAF1	TNFSF10	0.317	0.638
RSAD2	TRIM22	0.335	0.637
IFI6	PARP12	0.562	0.633
CFI	SERPING1	0.081	0.615
PLSCR1	OAS2	0.312	0.604
DDX60	DDX60L	0.595	0.603
RSAD2	UBE2L6	0.352	0.589
IFIT2	PARP12	0.375	0.564
PLSCR1	IFI6	0.212	0.543
IFITM1	TRIM22	0.255	0.532
IFITM1	DDX60	0.174	0.529
IFITM1	UBE2L6	0.343	0.523
TRIM22	IFIT2	0.329	0.517
UBE2L6	PARP12	0.267	0.516
PLSCR1	OASL	0.182	0.512
RSAD2	TNFSF10	0.301	0.511
DDX60	UBE2L6	0.335	0.505
IFIT2	PLSCR1	0.199	0.499
OAS1	TNFSF10	0.253	0.498
IL15	TNFSF10	0.063	0.496
XAF1	PLSCR1	0.182	0.49
TRIM22	IFI6	0.141	0.484
IFIT2	TNFSF10	0.263	0.484
TRIM22	UBE2L6	0.323	0.475
OAS2	TNFSF10	0.254	0.472
HLA-C	IL15	0	0.471
RSAD2	TRIM21	0.276	0.468
IFIT2	UBE2L6	0.196	0.465
TRIM5	TRIM21	0.108	0.464
MLKL	TNFSF10	0.091	0.464
IFITM1	PLSCR1	0.18	0.452
IFI6	TNFSF10	0.096	0.449
PARP10	PARP12	0.197	0.447
IFITM3	DDX60	0.09	0.445
XAF1	UBE2L6	0.333	0.44
PARP12	TRIM21	0.386	0.434
IFITM2	UBE2L6	0.185	0.433
RSAD2	TRIM5	0.142	0.431
DDX60	TRIM5	0.216	0.422
IFITM3	TRIM22	0.119	0.407
IFIT2	SP100	0.206	0.406
